# Supplementary material for: Selective transduction and photoinhibition of pre-Bötzinger complex neurons that project to the facial nucleus in rats affects nasofacial activity
Source: eLife. 2023 Sep 29;12:e85398. doi: 10.7554/eLife.85398 (PMC10653671; doi:10.7554/eLife.85398)
Supplement: Figure 2—source data 1. [file elife-85398-fig2-data1.xlsx]

## Sheet: SAP
Two Way Analysis of Variance SigmaPlot v11				Analysis Summary				Mann-Whitney Analysis													DATA GtACr2-GFP																DATA control								SAP GtACr2-GFP
									Below threshold?	P value	Mean rank of GtACR2	Mean rank of control	Mean rank diff.	Mann-Whitney U	Adjusted P Value						SAP																SAP
Data source: Data 1 in Notebook3				Column A	mix GtAcr2 + cre																																								rats	basal	P1	P2	recovery
				vs.	vs.			baseline	No	>0.999999	9	9	0	30	>0.999999						time	20200214A	20200214B	20200214C	20200616A	20200616B	20200616C	20200616D	20210111A	20210111B	20210111C	20210111D	20210112E				time	20210304A	20210304B	20210304C	20210304D	20210304E			20200214A	139.362	110.742	158.405	137.318
Balanced Design				Column B	control			P1	Yes	0.006141	6.917	14	-7.083	5	0.024564						0	138.823	133.346	136.865	104.997	108.146	95.8745	121.094	145.852	144.736	148.983	153.986	150.518				0	104.782	130.7	133.134	147.076	134.653			20200214B	134.954	99.6326	134.817	132.787
								P2	No	0.048481	10.58	5.2	5.383	11	0.193924						1	138.429	137.16	134.19	107.747	108.564	95.3538	121.3	143.828	141.487	152.399	151.237	149.256				1	103.905	129.395	137.028	150.254	135.316			20200214C	144.315	120.231	143.389	145.444
Dependent Variable: data				Test details				recovery	Yes	0.009373	7	13.8	-6.8	6	0.037492						2	137.547	133.38	131.927	108.223	108.339	96.5658	117.681	142.437	139.37	151.937	150.106	148.506				2	103.686	131.729	133.497	149.618	138.214			20200616A	108.316	83.9356	107.841	105.106
				Test name	Mann-Whitney test																3	140.399	135.995	141.768	107.399	107.738	95.6745	116.358	144.976	137.28	153.248	153.989	150.369				3	104.733	130.799	134.688	150.077	135.28			20200616B	110.738	88.4635	128.597	106.994
Normality Test:	Failed	(P < 0.050)		Comparison for each test	Compare ranks																4	140.026	135.743	144.928	106.51	109.421	93.7241	114.985	143.815	143.051	154.533	153.854	148.532				4	106.069	132.283	135.919	149.235	137.158			20200616C	98.1264	100.602	113.886	93.6144
				Multiple comparisons	Set P value threshold																5	139.301	131.978	143.965	107.332	110.348	96.3343	120.388	141.992	144.701	155.361	149.368	149.827				5	107.398	131.246	134.588	148.486	135.472			20200616D	118.976	115.152	125.377	117.849
Equal Variance Test:	Failed	(P < 0.050)		Method	Bonferroni-Dunn method																6	140.037	137.485	142.789	106.268	111.29	100.899	120.002	143.552	136.379	155.999	151.715	149.478				6	105.99	130.417	134.896	148.946	138.525			20210111A	144.484	98.8443	156.281	140.936
				Alpha	0.05																7	139.551	132.524	144.333	108.333	108.367	97.1505	121.634	146.074	139.352	155.896	153.52	149.03				7	104.828	128.231	134.408	148.24	134.215			20210111B	140.827	101.252	154.024	141.431
																					8	138.312	134.651	145.032	109.218	108.371	96.3847	118.769	143.494	143.128	156.595	152.028	148.373				8	106.12	128.123	133.211	150.672	136.569			20210111C	153.013	129.01	153.978	151.09
				Number of tests performed	4																9	140.318	136.864	144.103	108.636	106.977	96.7295	118.84	142.395	142.351	154.123	149.482	151.133				9	104.953	130.517	136.649	147.514	134.54			20210111D	151.485	96.7849	162.893	151.159
				Number of rows omitted	0																10	137.566	132.504	142.977	107.348	110.805	98.6267	117.377	145.31	136.979	150.761	153.261	147.729				10	106.907	130.676	133.699	149.228	135.675			20210112E	149.225	84.1492	154.7	145.191
																					11	138.205	137.357	146.159	108.592	112.675	97.4098	117.872	145.144	138.51	151.38	152.874	150.44				11	103.801	130.65	132.93	147.385	136.168
																					12	138.861	133.79	141.75	108.674	111.176	98.1426	117.935	142.676	142.154	153.218	148.844	147.87				12	105.568	131.918	135.435	148.789	133.925
																					13	138.223	133.688	144.385	108.032	111.925	96.745	120.042	145.212	142.456	153.362	150.445	150.634				13	106.519	131.358	133.068	147.042	136.786
																					14	139.918	136.706	146.787	109.365	106.11	98.9958	121.978	146.153	139.255	152.447	153.384	148.075				14	105.957	131.48	133.962	148.947	135.159
																					15	139.317	133.711	143.977	107.815	110.586	98.2442	120.287	142.934	137.547	153.103	152.679	150.537				15	106.993	130.118	135.022	148.947	135.409
																					16	140.471	135.466	147.053	107.962	112.2	96.8723	118.021	145.673	146.01	152.615	152.343	147.849				16	107.398	129.64	132.235	149.154	135.392
																					17	141.757	131.464	142.415	109.349	116.98	103.234	117.46	140.634	137.972	145.316	137.772	145.311				17	106.806	132.367	133.313	149.711	135.546
																					18	135.48	123.559	130.462	102.847	109.77	100.196	112.234	127.208	120.889	132.988	122.721	132.555				18	108.451	129.929	133.941	149.475	135.348
																					19	127.457	114.429	122.17	94.8061	102.315	98.9205	113.872	114.157	108.773	127.009	111.445	118.872				19	107.333	131.444	133.856	150.872	136.443
																					20	119.758	106.674	117.803	88.2776	97.0877	103.063	122.834	103.458	101.392	126.194	102.731	105.815				20	104.59	129.522	136.686	148.61	135.901
																					21	113.386	100.813	116.209	83.9357	92.0556	111.64	119.791	95.5531	99.0834	132.01	95.7696	96.5995				21	105.023	129.169	130.481	150.497	135.38
																					22	107.667	96.969	119.708	81.6391	87.3956	117.353	126.337	94.9579	103.27	143.212	91.1015	87.6141				22	106.355	131.444	133.389	148.697	137.55
																					23	106.322	97.8954	123.708	86.6866	86.0158	114.948	124.69	104.079	118.551	147.941	91.467	82.1355				23	103.842	129.789	134.055	150.736	134.261
																					24	113.912	104.696	131.502	97.5258	94.8232	117.865	125.203	117.134	142.202	151.286	99.4534	82.4106				24	104.509	130.371	132.766	148.059	136
																					25	127.84	113.584	135.423	107.907	108.075	113.928	128.494	128.808	150.254	157.807	113.243	89.2253				25	105.782	131.286	138.384	148.964	134.612
																					26	138.669	123.86	139.778	110.79	118.042	115.524	123.923	134.65	154.671	154.943	129.714	101.72				26	105.013	131.414	134.871	147.928	136.169
																					27	144.938	130.04	140.034	110.484	124.485	115.692	127.909	144.355	153.299	153.688	143.812	116.809				27	105.607	129.945	136.561	148.871	135.881
																					28	148.272	133.678	142.721	104.952	124.769	112.803	124.035	151.97	152.21	155.646	156.034	127.104				28	103.878	129.569	135.517	147.097	136.321
																					29	152.979	132.857	143.976	105.027	127.948	111.749	127.056	153.052	157.633	155.302	159.983	143.763				29	105.831	127.464	132.963	148.854	135.706
																					30	156.887	134.986	145.734	106.999	127.301	111.18	124.238	159.944	159.789	155.474	162.856	152.667				30	103.533	129.607	137.368	148.175	134.383
																					31	159.167	136.559	145.361	109.127	127.906	112.505	126.299	158.844	157.567	154.245	162.458	153.289				31	105.179	130.223	130.278	149.472	137.646
																					32	163.452	132.138	145.8	110.371	127.65	109.602	124.841	158.829	152.297	150.435	162.988	154.399				32	104.532	130.923	135.66	148.466	134.841
																					33	164.053	136.061	144.335	112.576	124.814	112.541	123.287	163.103	160.549	148.196	164.313	161.952				33	105.19	132.123	133.715	148.825	137.094
																					34	164.573	141.164	143.846	112.176	127.272	108.988	125.595	161.92	157.326	147.969	162.742	163.383				34	105.359	130.775	135.042	149.505	134.831
																					35	165.699	141.932	143.262	113.225	124.391	110.855	124.236	160.729	150.188	148.756	167	166.257				35	105.379	130.255	132.427	148.88	135.933
																					36	162.63	138.186	143.572	110.893	123.707	109.088	124.972	165.925	164.041	147.939	164.793	156.342				36	106.718	129.075	132.929	151.045	134.413
																					37	163.306	141.174	142.416	108.649	124.102	109.018	122.92	160.088	151.119	148.802	164.568	164.265				37	105.132	129.135	134.782	150.306	135.056
																					38	162.168	141.163	143.274	108.025	122.635	111.448	126.284	163.162	157.182	148.09	164.982	164.119				38	106.683	128.769	133.48	151.297	135.298
																					39	155.061	137.193	143.428	108.477	120.16	105.493	121.528	162.849	162.049	150.032	163.268	162.806				39	104.973	130.012	135.208	147.907	136.337
																					40	157.625	135.522	145.417	106.959	119.399	110.03	126.707	162.705	148.397	150.292	162.452	168.664				40	104.441	131.094	137.889	150.818	137.968
																					41	154.01	137.254	147.079	109.593	120.986	106.668	122.335	165.751	162.094	148.952	162.61	169.855				41	104.66	131.158	133.709	150.032	134.788
																					42	152.798	137.523	147.597	106.158	117.397	106.603	126.662	159.832	154.879	148.315	163.005	169.273				42	101.949	129.01	135.21	151.076	136.465
																					43	156.794	134.153	145.295	110.134	118.762	107.192	121.71	164.049	155.831	148.957	162.344	169.12				43	104.073	130.262	134.288	147.726	135.192
																					44	152.556	133.156	146.94	105.394	110.575	106.442	126.73	159.706	159.953	144.92	162.672	166.991				44	103.658	128.47	136.05	149.131	137.868
																					45	155.945	136.69	147.185	107.166	121.89	106.917	119.93	162.103	149.639	146.429	162.516	164.034				45	104.822	130.614	132.616	145.318	136.137
																					46	152.762	135.964	147.937	106.583	108.782	104.457	125.397	165.315	160.306	148.003	160.495	166.334				46	102.802	130.428	134.216	148.989	136.552
																					47	152.371	131.537	145.428	104.832	117.946	106.139	122.61	158.639	147.948	150.017	160.935	166.25				47	103.985	131.148	133.948	147.012	135.797
																					48	155.015	134.379	146.194	107.679	119.886	104.891	121.455	163.041	159.881	148.085	163.47	168.18				48	102.133	129.803	132.868	148.654	135.162
																					49	152.424	137.758	145.349	109.848	113.918	107.423	122.186	162.043	154.039	151.095	159.629	169.958				49	103.187	128.823	134.934	147.781	136.72
																					50	152.263	135.162	144.158	106.46	106.279	103.854	124.475	158.561	155.551	150.54	162.367	170.462				50	101.027	128.796	134.796	151.187	136.068
																					51	151.489	133.482	145.251	109.05	104.921	101.407	124.728	163.847	157.255	151.576	163.19	168.503				51	103.362	128.816	133.835	148.725	137.745
																					52	152.15	133.262	143.597	109.045	101.888	98.5317	119.072	157.993	152.977	150.952	160.368	167.693				52	99.9766	130.69	135.781	149.807	134.426
																					53	150.436	136.627	145.787	100.678	102.912	93.7382	110.551	160.877	159.23	152.408	160.733	168.044				53	101.707	130.536	133.709	148.518	136.575
																					54	154.904	138.188	145.15	103.632	102.702	91.2552	112.686	161.526	150.511	153.184	162.445	165.809				54	102.181	131.617	134.725	150.051	134.677
																					55	152.77	135.187	144.738	91.8854	102.862	88.3375	111.799	156.521	159.291	149.056	163.282	164.079				55	102.198	130.029	133.787	147.708	136.378
																					56	152.864	133.771	146.372	91.788	105.178	88.2216	112.247	161.237	154.244	153.508	160.504	160.886				56	102.879	129.289	134.03	150.015	134.129
																					57	156.865	133.998	145.523	95.0936	105.751	86.9331	115.386	158.746	156.779	152.223	162.059	166.66				57	103.189	129.839	131.897	147.989	135.52
																					58	154.414	136.83	143.928	96.6494	106.598	88.8449	115.983	159.656	157.529	151.853	163.639	143.718				58	103.374	130.502	134.959	150.95	135.892
																					59	151.064	135.488	145.529	99.0073	108.551	89.5127	119.872	162.175	149.938	154.807	161.28	137.246				59	104.487	132.959	135.524	148.971	138.208
																					60	151.539	136.36	144.992	99.7573	109.871	91.7121	117.506	154.272	156.094	154.262	159.839	139.586				60	102.6	132.683	135.893	150.449	135.338
																					61	149.644	135.333	143.983	101.246	105.184	93.7111	119.052	157.712	133.955	152.528	160.869	140.923				61	102.093	131.442	136.059	150.728	136.689
																					62	150.791	132.786	145.788	102.484		94.4094	117.136	160.275	130.235	153.731	160.994	145.745				62	102.174	131.014	137.158	150.321	136.465
																					63	148.451	135.068	144.73	105.409		96.0171	118.169	153	130.138	152.849	160.789	142.892				63	99.6812	130.44	133.865	150.184	136.942
																					64	137.316	134.655	144.639	101.778		96.1949	117.572	133.162	135.154	154.305	155.096	142.343				64	100.891	130.309	134.534	149.79	136.54
																					65	132.822	135.204	145.871	102.852			115.199	131.68	140.733	152.785	153.161	147.373				65	102.364	129.958	135.642	149.91	135.794
																					66	132.602	131.943	146.114	104.141				137.395	138.732	153.23	145.086	144.997				66	101.221	130.611	133.937	149.054	137.273
																					67	134.039	132.281	144.736	102.921				137.205	137.424	150.857	137.995	144.993				67	102.06	131.365	135.945	149.942	136.547
																					68	132.552	132.642	146.294					135.964	137.555	151.287	142.192	149.808				68	101.612	131.214	134.154	148.138	136.345
																					69	134.389	133.716	143.278					139.478	138.137	148.822	143.961	145.624				69	102.598	131.404	134.472	149.981	135.229
																					70	136.522	135.047	142.254					140.16	146.29	151.639	142.976	145.575				70	103.17	131.741	135.446	150.382	138.325
																					71	137.01	135.271	140.437					142.176	140.857	152.627	148.436					71	103.094		134.63	150.941	136.472
																					72	133.841	131.843	139.852					139.3	139.383	154.855	146.565					72	102.432		134.188	148.713	139.61
																					73	137.414	129.951	140.524					139.252	138.092	154.157	149.585					73	102.846		135.413	151.155	137.053
																					74	141.798	131.661	142.429					142.529	139.673		146.279					74	100.384		134.226	151.12	138.063
																					75	137.19	134.891	143.249					141.168			150.186					75	103.107		136.135	152.172	134.886
																					76	138.967	134.441	139.982					138.132			148.045					76			135.677	149.934	137.17
																					77	138.808	135.413	143.665					141.925			149.003					77				150.126	136.63
																					78		133.113	143.814								151.488					78				149.419	137.254
																					79		133.283	143.116													79					136.756
																					80		135.047	144.175													80					137.665
																					81		132.606	144.952													81					134.566
																					82		135.41	142.669													82					136.223
																					83		136.628	145.773
																					84		136.811
																					85		133.777
																					86		132.548
																					87		132.537
																					88		133.868
																					89		131.358
																					90		126.399
																					91		126.453
																					92		122.396
																					93		128.986
																					94		125.781
																					95		127.477
																					96		131.233
																					97		127.565
																					98		131.609
																					99		128.327
																					100		131.619
																					101		134.321
																					102		130.091
																					103		133.025

## Sheet: HR
Two Way Analysis of Variance SigmaPlot v11				Analysis Summary				Mann-Whitney Analysis													DATA GtACr2-GFP																DATA control								HR GtACr2-GFP
									Below threshold?	P value	Mean rank of GtACR2	Mean rank of control	Mean rank diff.	Mann-Whitney U	Adjusted P Value						HR																HR
Data source: Data 1 in Notebook3				Column A	mix GtAcr2 + cre																																								rats	basal	P1	P2	reovery
				vs.	vs.			baseline	No	>0.999999	9	9	0	30	>0.999999						time	20200214A	20200214B	20200214C	20200616A	20200616B	20200616C	20200616D	20210111A	20210111B	20210111C	20210111D	20210112E				time	20210304A	20210304B	20210304C	20210304D	20210304E			20200214A	352.897	359.465	345.697	362.88
Balanced Design				Column B	control			P1	No	0.036522	7.333	13	-5.667	10	0.146089						0	355.151	328.775	324.952	334.936	393.586	422.587	431.995	398.24	471.052	410.633	307.608	354.425				0	360.682	304.696	376.857	319.528	317.433			20200214B	328.445	263.325	271.62	322.568
								P2	No	0.159987	7.833	11.8	-3.967	16	0.639948						1	350.289	331.316	325.739	338.214	392.721	422.088	426.382	397.952	461.351	410.094	303.288	356.825				1	360.833	309.279	378.514	317.295	315.171			20200214C	325.195	298.349	297.106	328.372
Dependent Variable: data				Test details				recovery	No	0.328378	9.833	7	2.833	20	>0.999999						2	352.148	335.187	322.776	338.699	393.867	415.78	429.455	403.594	462.086	406.096	309.264	355.931				2	356.953	307.292	381.643	317.672	316.665			20200616A	333.731	327.771	319.417	325.801
				Test name	Mann-Whitney test																3	349.618	323.809	329.553	335.426	396.238	422.503	425.362	400.961	466.926	407.789	303.308	356.695				3	358.09	305.69	381.791	315.832	314.139			20200616B	393.886	372.235	413.608	403.125
Normality Test:	Failed	(P < 0.050)		Comparison for each test	Compare ranks																4	356.704	344.22	321.877	331.492	397.424	431.226	434.073	398.374	471.451	408.07	307.648	356.734				4	358.258	305.665	378.529	320.458	314.239			20200616C	415.289	410.489	391.183	422.264
				Multiple comparisons	Set P value threshold																5	352.664	316.211	319.871	330.876	393.664	415.25	441.018	401.624	461.744	406.759	303.683	358.208				5	360.969	307.6	381.303	317.282	314.372			20200616D	432.848	431.736	380.56	429.222
Equal Variance Test:	Failed	(P < 0.050)		Method	Bonferroni-Dunn method																6	353.232	325.602	322.955	331.032	392.94	407.417	436.589	404.485	461.695	406.08	308.91	353.803				6	359.281	303.777	377.852	316.202	316.531			20210111A	401.167	348.287	388.773	404.945
				Alpha	0.05																7	347.876	326.837	324.167	332.197	393.329	423.444	436.753	401.969	472.441	405.044	306.226	355.343				7	356.43	300.074	379.245	320.175	317.854			20210111B	464.834	442.261	453.695	470.683
																					8	352.902	316.922	321.515	336.229	389.555	418.088	432.402	397.584	467.854	401.353	308.483	357.48				8	357.856	294.475	382.166	319.274	309.059			20210111C	403.736	406.436	414.859	401.052
				Number of tests performed	4																9	351.713	343.499	325.44	335.792	393.033	411.176	429.829	402.024	460.632	400.853	311.468	361.386				9	361.767	296.8	384.615	314.216	315.238			20210111D	306.913	222.368	272.878	321.341
				Number of rows omitted	0																10	355.932	324.869	322.425	331.374	396.063	407.886	433.979	402.13	459.852	404.628	304.264	355.313				10	355.417	301.298	385.285	317.045	309.948			20210112E	358.626	299.387	305.693	363.824
																					11	350.665	331.161	320.682	332.964	391.372	421.05	433.596	398.213	468.75	407.691	305.024	359.005				11	360.423	301.588	382.361	318.243	313.84
																					12	352.306	331.393	323.69	333.93	391.8	417.175	435.065	400.639	466.386	402.937	307.488	362.419				12	361.446	312.928	383.387	319.366	311.074
																					13	355.257	315.109	326.463	336.31	391.023	411.679	426.81	401.68	461.538	402.685	309.129	361.234				13	359.515	312.447	386.282	318.304	315.38
																					14	351.788	329.864	325.195	332.715	392.143	413.465	430.736	397.332	459.826	401.587	306.514	355.037				14	359.032	314.05	378.549	313.548	310.519
																					15	354.267	321.799	326.141	333.948	393.402	414.985	431.655	397.96	468.75	403.816	310.005	357.786				15	361.061	311.838	384.115	318.623	314.433
																					16	357.011	317.065	323.327	327.281	390.982	421.831	432.377	405.952	466.034	405.405	270.732	357.476				16	362.244	311.545	389.211	314.727	320.634
																					17	347.002	252.484	299.969	322.692	381.623	411.775	430.592	378.95	448.417	408.509	254.714	297.743				17	364.203	305.972	380.53	318.756	309.773
																					18	342.111	273.479	299.588	322.895	370.003	413.036	427.152	359.747	443.27	406.6	239.541	279.627				18	362.993	305.957	387.087	315.286	314.461
																					19	347.423	276.569	299.363	325.15	364.775	419.875	432.562	342.582	436.616	408.163	228.514	296.173				19	358.876	309.894	379.653	311.827	310.043
																					20	353.717	268.209	298.304	325.123	376.723	410.901	436.591	342.906	446.57	413.829	217.838	301.42				20	356.576	309.845	379.473	308.876	311.732
																					21	357.568	260.653	298.849	327.869	375.782	412.091	425.808	354.325	444.981	416.667	216.503	300.296				21	357.846	306.187	378.21	309.345	311.291
																					22	360.824	261.846	291.469	323.059	379.797	405.5	417.042	360.703	441.822	416.964	217.569	310.944				22	355.963	299.285	377.566	310.859	317.822
																					23	364.351	276.436	297.133	329.454	392.157	400.74	420.18	371.461	452.512	418.314	238.862	295.216				23	351.131	287.4	379.722	310.303	313.355
																					24	368.76	268.644	302.447	328.196	392.863	395.274	401.684	377.033	455.764	416.936	241.779	281.751				24	353.332	297.088	378.223	309.096	317.201
																					25	375.197	280.796	294.752	322.479	401.923	401.551	410.818	383.069	460.702	414.312	245.528	294.461				25	353.447	295.634	378.549	306.439	313.681
																					26	376.157	280.431	293.385	319.261	410.594	400.701	397.238	384.2	457.928	414.499	248.874	315.278				26	354.856	301.888	378.327	312.045	313.301
																					27	375.014	282.413	300.169	316.915	407.458	396.004	393.876	383.098	458.147	410.959	248.446	285.278				27	353.749	299.661	379.014	309.157	316.079
																					28	371.84	279.332	301.781	317.011	411.454	387.609	376.254	392.445	448.395	410.426	269.422	337.33				28	355.182	295.662	380.689	309.617	308.149
																					29	367.523	270.83	297.516	317.269	411.097	376.493	386.531	387.556	444.503	411.591	272.833	299.981				29	354.773	294.275	379.23	307.545	307.62
																					30	368.862	264.999	293.231	311.735	413.001	368.18	377.401	387.591	453.612	416.403	267.085	301.091				30	345.26	297.703	377.894	312.024	307.877
																					31	367.993	266	296.172	323.32	414.467	373.241	387.587	391.948	454.259	415.193	270.938	306.295				31	355.03	295.529	374.584	307.578	313.585
																					32	366.516	266.972	295.255	320.425	412.052	375.694	376.246	388.297	447.761	411.198	281.157	333.411				32	351.073	298.593	372.9	310.251	308.902
																					33	360.301	296.592	294.729	320.347	415.902	383.888	390.605	391.457	451.766	411.807	269.528	306.212				33	354.444	305.601	376.998	309.033	308.35
																					34	359.16	317.775	294.907	319.911	415.15	396.668	379.791	399.063	450.68	413.793	268.618	307.543				34	351.133	300.655	377.823	310.594	310.326
																					35	354.533	312.645	296	323.159	419.474	379.671	383.785	385.071	443.457	411.629	273.65	307.195				35	348.957	295.618	376.467	309.595	308.218
																					36	349.048	291.408	294.02	316.007	416.586	385.528	369.463	396.039	454.773	412.371	272.319	195.817				36	353.489	289.647	380.29	308.492	311.432
																					37	353.616	285.117	295.198	316.523	407.073	380.47	372.671	394.051	451.422	414.153	271.614	303.277				37	347.545	289.518	377.903	305.907	313.738
																					38	340.881	272.435	293.422	316.683	413.066	382.933	368.796	390.887	447.867	412.654	265.409	302.317				38	354.186	287.379	375	308.041	308.393
																					39	350.604	274.732	289.745	317.121	406.844	388.737	374.421	395.103	454.131	413.793	262.389	331.412				39	352.454	290.602	378.552	307.001	311.282
																					40	344.846	263.746	295.758	320.08	414.338	397.499	369.831	386.782	449.122	410.741	266.106	333.712				40	355.04	298.382	375.38	302.09	313.161
																					41	339.202	301.629	291.675	321.62	409.428	394.079	378.633	397.617	452.27	407.667	266.939	314.364				41	348.55	294.31	376.41	308.213	305.673
																					42	349.619	291.094	291.852	321.251	397.654	388.218	377.542	388.563	453.688	406.89	264.129	344.329				42	353.312	297.106	375.517	302.763	306.351
																					43	346.263	275.98	288.621	325.431	404.904	389.793	372.916	392.577	449.883	404.669	261.378	347.535				43	347.281	289.329	381.366	303.947	305.168
																					44	352.267	272.931	289.484	322.389	404.235	387.976	378.631	393	461.892	408.085	264.501	344.793				44	350.462	290.241	378.147	303.649	309.838
																					45	344.176	295.104	290.581	322.149	402.207	388.364	384.214	385.616	450.266	405.196	265.538	339.225				45	348.281	283.417	375.686	306.254	311.57
																					46	345.089	272.142	292.949	319.162	401.755	388.343	375.978	395.441	461.655	404.658	264.555	342.304				46	353.728	288.994	378.541	303.189	309.81
																					47	347.184	272.305	288.771	323.028	396.018	405.544	377.565	388.057	452.409	405.713	256.588	342.47				47	350.584	296.133	373.511	306.732	313.195
																					48	343.494	268.502	291.811	317.803	401.701	396.854	389.949	391.247	452.925	405.193	263.158	347.68				48	347.911	301.321	380.609	311.087	309.194
																					49	344.716	276.513	286.739	324.311	402.761	393.466	381.595	392.732	458.834	409.351	262.595	358.626				49	349.329	298.934	380.387	314.842	309.462
																					50	347.806	254.923	289.603	318.514	402.315	393.266	389.386	385.789	451.417	410.333	267.783	352.712				50	347.255	293.549	378.382	309.081	306.214
																					51	341.669	269.206	288.682	323.598	413.793	398.992	386.466	397.354	456.362	409.556	257.338	357.93				51	344.159	289.394	377.358	308.991	309.378
																					52	346.088	253.386	290.318	320.135	407.817	410.104	408.163	390.263	451.799	409.638	271.528	359.028				52	343.213	300.979	374.28	306.123	311.348
																					53	342.198	259.12	290.336	318.779	405.361	422.397	407.715	387.697	456.763	404.241	268.26	362.439				53	345.638	300.232	371.631	309.438	309.278
																					54	343.884	276.445	294.535	275.105	409.537	412.046	416.639	396.714	458.577	408.163	269.694	359.61				54	347.187	297.308	374.127	310.454	313.52
																					55	346.925	249.139	291.21	271.643	415.401	421.353	414.182	388.919	454.977	404.998	268.35	357.508				55	349.718	302.585	375.033	311.145	311.042
																					56	343.881	266.646	286.622	309.858	404.615	414.691	423.618	391.72	455.94	407.432	275.149	361.786				56	346.787	301.924	380.095	309.773	314.614
																					57	340.353	268.549	298.174	321.485	405.405	422.12	421.245	394.004	455.331	407.159	275.542	348.165				57	349.981	298.666	371.917	305.378	310.042
																					58	335.419	281.371	290.711	325.926	401.92	412.996	426.229	384.989	460.012	410.959	274.726	361.056				58	345.936	301.711	375.331	306.492	310.551
																					59	342.139	241.306	289.25	331.992	402.695	426.132	426.762	392.893	453.055	403.838	273.973	370.289				59	350.041	307.447	375.215	310.164	301.448
																					60	338.997	253.514	291.08	330.239	409.506	418.961	422.286	388.156	460.359	402.235	273.332	364.249				60	347.743	302.411	371.272	311.257	310.853
																					61	348.409	248.593	293.154	326.512	397.894	428.48	425.142	386.836	452.526	404.04	276.236	374.309				61	351.368	311.456	378.426	309.949	312.866
																					62	342.764	261.411	289.689	327.547		420.96	424.824	392.832	462.818	405.404	275.679	374.75				62	344.585	309.523	377.358	308.161	309.744
																					63	320.005	277.041	289.693	332.351		416.314	431.69	380.408	465.192	400	273.286	367.236				63	353.07	305.296	379.338	309.176	308.976
																					64	296.924	251.005	286.936	328.602		434.26	425.897	389.888	472.93	399.776	283.029	371.443				64	349.808	307.155	375.156	306.517	311.329
																					65	325.042	242.164	291.437	324.374			431.989	395.131	468.631	402.002	293.668	370.807				65	345.826	309.073	377.67	305.149	311.002
																					66	334.234	259.463	290.25	326.149				399.837	466.681	399.316	295.916	371.021				66	351.904	311.788	377.632	308.676	319.514
																					67	343.631	255.689	290.575	325.701				397.234	463.972	399.87	308.928	371.129				67	355.459	312.104	388.85	306.124	314.183
																					68	351.021	247.418	294.661					399.999	468.913	400.347	323.833	375.03				68	348.345	315.03	380.952	312.296	309.938
																					69	357.732	255.924	308.585					404.361	472.441	402.703	317.083	369.296				69	349.14	319.572	385.266	308.392	310.445
																					70	357.868	254.804	315.105					406.087	469.407	400.445	324.48	373.714				70	352.802	317.95	375.197	314.505	308.124
																					71	362.277	256.383	324.235					398.523	464.951	404.68	331.017					71	350.774		383.575	311.154	308.886
																					72	361.615	253.978	325.598					403.845	466.511	402.196	327.722					72	354.477		382.705	310.881	311.68
																					73	360.807	239.969	319.995					405.752	469.538	399.44	323.845					73	356.815		378.074	313.656	310.798
																					74	363.199	257.473	324.476					402.326	474.308		331.492					74	351.488		384.225	310.96	311.122
																					75	364.156	262.22	330.133					395.948			335.416					75	354.251		384.525	310.418	315.637
																					76	365.158	256.908	329.271					403.974			334.095					76			384.192	310.689	316.212
																					77	364.345	254.851	328.856					408.703			327.503					77				309.64	318.523
																					78		239.28	329.764								326.229					78				314.815	319.77
																					79		263.762	330.631													79					319.121
																					80		259.755	329.982													80					314.568
																					81		236.485	326.489													81					320.481
																					82		254.151	328.253													82					313.554
																					83		257.182	327.398
																					84		283.849
																					85		254.154
																					86		258.149
																					87		257.219
																					88		266.659
																					89		286.33
																					90		234.269
																					91		289.43
																					92		309.53
																					93		317.985
																					94		325.621
																					95		310.567
																					96		323.705
																					97		316.763
																					98		327.731
																					99		323.243
																					100		315.351
																					101		337.419
																					102		314.105
																					103		309.203

## Sheet: DIA activity (AUC)
Two Way Analysis of Variance SigmaPlot v11					Analysis Summary				Mann-Whitney Analysis											DATA GtACr2-GFP									DATA control									DATA GtACr2-GFP
										Below threshold?	P value	Mean rank of GtACR2	Mean rank of control	Mean rank diff.	Mann-Whitney U	Adjusted P Value				AUC DIA									AUC DIA									DIA AMPL
Data source: Data 1 in DIA activity					Table Analyzed	Two-way ANOVA , not RM														rats	basal	P1	P2	5 cycles after stim					rats	basal	P1	P2	5 cycles after stim
									baseline	No	>0.999999	9	9	0	30	>0.999999				20200214A	0.236334	0.118362	0.362135	0.257103					20210304A	0.047459	0.0483704	0.0491387	0.044667					time	20200214A	20200214B	20200214C	20200616A	20200616B	20200616C	20200616D	20210111A	20210111B	20210111C	20210111D
General Linear Model					Column A	GtACR2			P1	No	0.036522	7.333	13	-5.667	10	0.146089				20200214B	1.06922	0.29623	0.872115	1.06499					20210304B	0.0692843	0.0699142	0.0695101	0.0725152					0	0.312118	0.854973	0.539794	0.177946	0.148089	0.187492	0.330302	0.035201	0.024057	0.097177	0.02945
					vs.	vs.			P2	No	0.382676	8.25	10.8	-2.55	21	>0.999999				20200214C	0.590749	0.188669	0.596623	0.607493					20210304C	0.0336295	0.033256	0.0327769	0.0322073					1	0.328829	0.846518	0.516946	0.17049	0.151644	0.183463	0.312131	0.036861	0.0256	0.097026	0.034419
Dependent Variable: Data					Column B	control			recovery	No	0.081771	10.42	5.6	4.817	13	0.327085				20200616A	0.157731	0.21889	0.161051	0.178323					20210304D	0.0360688	0.0370723	0.0379116	0.0340078					2	0.328178	0.853481	0.524353	0.174831	0.145613	0.205586	0.30354	0.029368	0.02612	0.092411	0.035647
																				20200616B	0.131724	0.13581	0.0452563	0.137303					20210304E	0.123619	0.122559	0.120695	0.120616					3	0.305995	0.912678	0.540424	0.172101	0.145517	0.205956	0.317707	0.03416	0.024337	0.091281	0.032704
Normality Test:	Failed	(P < 0.050)			Test details															20200616C	0.197863	0.142033	0.312843	0.222447														4	0.349166	0.991623	0.561882	0.165431	0.148995	0.179619	0.314943	0.034121	0.024431	0.093144	0.030495
					Test name	Mann-Whitney test														20200616D	0.276565	0.121556	0.190434	0.291484														5	0.315594	0.88294	0.549842	0.16859	0.153826	0.171919	0.287226	0.032485	0.025018	0.089627	0.031417
Equal Variance Test:	Failed	(P < 0.050)			Comparison for each test	Compare ranks														20210111A	0.0389917	0.00859769	0.0280356	0.0381155														6	0.320765	0.849884	0.518834	0.170211	0.172397	0.190801	0.309474	0.039961	0.023834	0.094611	0.033472
					Multiple comparisons	Set P value threshold														20210111B	0.0267244	0.00764964	0.0172312	0.0279047														7	0.317554	0.923378	0.537534	0.188378	0.157536	0.196588	0.295078	0.034579	0.02605	0.093342	0.033035
					Method	Bonferroni-Dunn method														20210111C	0.125504	0.0779188	0.136194	0.12533														8	0.299677	0.857758	0.546067	0.184796	0.163749	0.190924	0.276844	0.032245	0.023781	0.094073	0.030645
					Alpha	0.05														20210111D	0.0397138	0.0240844	0.0269731	0.0410709														9	0.333813	0.86082	0.514567	0.186611	0.17043	0.188999	0.298289	0.031791	0.026024	0.090254	0.030293
																				20210112E	0.0167964	0.00702348	0.0134553	0.0149596														10	0.321186	0.795813	0.526034	0.178047	0.150038	0.193295	0.321427	0.03347	0.023316	0.088791	0.02927
					Number of tests performed	4																																11	0.306039	0.835726	0.521148	0.180735	0.158441	0.185709	0.275482	0.033455	0.025224	0.08969	0.031979
					Number of rows omitted	0																																12	0.341569	0.824391	0.552968	0.174515	0.144383	0.198822	0.292987	0.031532	0.023968	0.099573	0.03088
																																						13	0.352384	0.877583	0.485973	0.185745	0.163421	0.193288	0.29988	0.033928	0.024974	0.089	0.032023
																																						14	0.314639	0.858514	0.565534	0.175166	0.168001	0.193093	0.301991	0.034696	0.025815	0.085965	0.03373
																				DATA GtACr2-GFP									DATA control									15	0.314566	0.911826	0.594819	0.164922	0.160289	0.197734	0.316415	0.033227	0.024835	0.085415	0.029288
																				AUC DIA (%)									AUC DIA (%)									16	0	0	0	0	0	0	0	0	0	0	0
																				rats	basal	P1	P2	5 cycles after stim					rats	basal	P1	P2	5 cycles after stim					17	0	0	0	0	0	0	0	0	0	0	0
																				20200214A	100	50.0825	153.23	108.788					20210304A	100	101.92	103.539	94.1169					18	0	0	0	0	0	0	0	0	0	0.080552	0
																				20200214B	100	27.7052	81.5655	99.604					20210304B	100	100.909	100.326	104.663					19	0	0	0	0	0	0	0	0	0	0.075057	0
																				20200214C	100	31.9373	100.994	102.834					20210304C	100	98.8895	97.4647	95.771					20	0	0	0	0	0	0	0.16525	0	0	0.071133	0
																				20200616A	100	138.774	102.105	113.055					20210304D	100	102.782	105.109	94.2862					21	0	0	0	0	0	0	0.183689	0	0	0.078888	0
																				20200616B	100	103.102	34.3569	104.235					20210304E	100	99.1428	97.6347	97.5709					22	0	0	0.26691	0	0	0	0.207838	0	0	0.083883	0
																				20200616C	100	71.7833	158.111	112.425														23	0	0	0.333567	0	0	0	0.241204	0	0	0.088562	0
																				20200616D	100	43.9519	68.8568	105.394														24	0	0	0.41036	0	0	0	0.264388	0	0.010713	0.095252	0
																				20210111A	100	22.0501	71.9017	97.7529														25	0	0	0.464524	0.117841	0	0	0.264292	0.016039	0.013846	0.085187	0
																				20210111B	100	28.6242	64.4773	104.417														26	0	0	0.54018	0.132801	0	0.208345	0.247797	0.01648	0.015146	0.092262	0
																				20210111C	100	62.0845	108.517	99.8606														27	0	0	0.474711	0.296297	0.049626	0.215863	0.269921	0.021301	0.018119	0.092396	0
																				20210111D	100	60.6449	67.9187	103.417														28	0	0.668355	0.532462	0	0.053033	0.222051	0.269455	0.022562	0.018514	0.098785	0.017135
																				20210112E	100	41.8153	80.108	89.0642														29	0	0.666901	0.506449	0.184214	0.064255	0.248182	0.255645	0.021002	0.01908	0.091396	0.022707
																																						30	0	0.707788	0.480248	0.16076	0.107255	0.200074	0.267508	0.022031	0.018798	0.085181	0.01845
																																						31	0	0.717162	0.458797	0.149914	0.087599	0.17448	0.242797	0.022591	0.019427	0.089833	0.018741
																																						32	0	0.798209	0.566164	0.173034	0.117918	0.174861	0.257561	0.026165	0.020092	0.095044	0.021809
																																						33	0	0.716633	0.527334	0.170244	0.08036	0.163746	0.279652	0.029266	0.019657	0.092081	0.021833
																																						34	0	0.728902	0.593663	0.09082	0.099938	0.166177	0.259849	0.024546	0.01651	0.094764	0.021088
																																						35	0	0.781727	0.545466	0.14391	0.095375	0.183888	0.256744	0.026652	0.020652	0.093311	0.022575
																																						36	0.327986	0.7889	0.51477	0.161837	0.108339	0.195514	0.266378	0.022139	0.017147	0.094334	0.023752
																																						37	0.330425	0.805559	0.57927	0.115657	0.11062	0.176793	0.282665	0.025418	0.020525	0.090462	0.029204
																																						38	0.324119	0.804523	0.529875	0.168662	0.107081	0.171656	0.280218	0.026523	0.020428	0.091523	0.021552
																																						39	0.301131	0.767954	0.548321	0.176511	0.132328	0.212993	0.257861	0.027181	0.020367	0.090931	0.022619
																																						40	0.27008	0.817395	0.573836	0.196388	0.122996	0.207649	0.258598	0.026563	0.019579	0.093996	0.020723
																																						41	0.288222	0.75681	0.508616	0.174928	0.138462	0.194013	0.272803	0.027303	0.01981	0.09413	0.022561
																																						42	0.304726	0.727473	0.597392	0.153876	0.1203	0.188284	0.25116	0.024242	0.022498	0.098431	0.021697
																																						43	0.260886	0.839761	0.559517	0.152539	0.118752	0.183191	0.273621	0.025564	0.020609	0.088223	0.023329
																																						44	0.297105	0.765983	0.544194	0.17066	0.484412	0.192126	0.294103	0.031186	0.021301	0.09523	0.02266
																																						45	0.336843	0.845794	0.545086	0.165004	0.232533	0.185486	0.249776	0.026137	0.020412	0.093353	0.022227
																																						46	0.260815	0.822526	0.549481	0.164736	0.04946	0.204661	0.279009	0.025955	0.01919	0.084271	0.022095
																																						47	0.306127	0.750054	0.547418	0.167904	0.147313	0.169217	0.265373	0.026294	0.019479	0.104904	0.022627
																																						48	0.351529	0.748799	0.589299	0.174154	0.163862	0.191431	0.27876	0.027067	0.020942	0.093467	0.020765
																																						49	0.337857	0.755636	0.560876	0.167639	0.167506	0.192312	0.260525	0.028316	0.021259	0.095223	0.026313
																																						50	0.250726	0.84464	0.520745	0.180234	0.180488	0.260249	0.275485	0.023507	0.019874	0.09513	0.025769
																																						51	0.261312	0.790196	0.578083	0.107486	0.177069	0.260156	0.362232	0.027048	0.017083	0.093189	0.02339
																																						52	0.357908	0.74256	0.57503	0.142785	0.16877	0.265288	0.375731	0.023931	0.020379	0.092531	0.022508
																																						53	0.228987	0.787651	0.528434	0.810159	0.172495	0.239931	0.373543	0.023503	0.019356	0.093566	0.021338
																																						54	0.263509	0.776697	0.564279	0.082524	0.171123	0.250694	0.325596	0.026091	0.020524	0.096245	0.023158
																																						55	0.331051	0.841412	0.552085	0.109206	0.171994	0.28132	0.318611	0.029232	0.019419	0.092588	0.02198
																																						56	0.333016	0.77345	0.558022	0.231468	0.156525	0.253744	0.338846	0.026241	0.019532	0.087746	0.024023
																																						57	0.306858	0.730889	0.600702	0.226577	0.172653	0.270205	0.365569	0.029045	0.020418	0.091273	0.022918
																																						58	0.298888	0.794309	0.511082	0.155089	0.159202	0.215736	0.315787	0.027177	0.020718	0.096187	0.022795
																																						59	0.32724	0.78979	0.58145	0.188872	0.153772	0.262817	0.30768	0.02723	0.020048	0.095247	0.025665
																																						60	0.328408	0.822942	0.525504	0.256205	0.163719	0.235417	0.307572	0.024172	0.044004	0.09053	0.024881
																																						61	0.36541	0.796595	0.489338	0.190022	0.187294	0.235747	0.3267	0.02701	0.023048	0.087686	0.022452
																																						62	0.327665	0.795243	0.519175	0.189759		0.238567	0.322093	0.040237	0.028996	0.091355	0.022307
																																						63	0.813536	0.754163	0.524036	0.154515		0.253699	0.308046	0.032718	0.026225	0.092605	0.019184
																																						64	0.569512	0.707134	0.489812	0.227685		0.228713	0.317447	0.039655	0.026244	0.095802	0.062923
																																						65	0.340825	0.815754	0.456704	0.213123			0.320805	0.039336	0.026982	0.092983	0
																																						66	0.321847	0.800163	0.474519	0.200921				0.038707	0.02679	0.086205	0.03274
																																						67	0.393595	0.758203	0.522118	0.20447				0.035337	0.028826	0.096895	0.033012
																																						68	0.378064	0.793753	0.602276					0.035609	0.025124	0.101805	0.03522
																																						69	0.365647	0.745819	0.566596					0.032824	0.027556	0.09986	0.036971
																																						70	0.404136	0.764942	0.634813					0.040755	0.024629	0.091439	0.037451
																																						71	0.333738	0.754421	0.635202					0.034468	0.024536	0.094982	0.034507
																																						72	0.417284	0.770585	0.578088					0.032181	0.027267	0.095708	0.034935
																																						73	0.327012	0.750828	0.565081					0.033192	0.028494	0.092658	0.034751
																																						74	0.377207	0.792094	0.637764					0.036263	0.025827		0.033007
																																						75	0.37361	0.746721	0.583993					0.037822			0.033638
																																						76	0.351403	0.716747	0.589911					0.031434			0.034113
																																						77	0.32962	0.806788	0.612341					0.035955			0.034703
																																						78		0.843802	0.536046								0.034043
																																						79		0.70605	0.546039
																																						80		0.727539	0.529007
																																						81		0.792971	0.605585
																																						82		0.773642	0.53461
																																						83		0.812681	0.588288
																																						84		0.725694
																																						85		0.813706
																																						86		0.802033
																																						87		0.768572
																																						88		1.08871
																																						89		1.43761
																																						90		0.80772
																																						91		0.971523
																																						92		0.92638
																																						93		0.854825
																																						94		0.840043
																																						95		0.929331
																																						96		0.945537
																																						97		0.957948
																																						98		1.01496
																																						99		0.889651
																																						100		0.928097
																																						101		0.897071
																																						102		0.935465
																																						103		0.895963
[truncated: 7 more columns]

## Sheet: MP Activity (AUC)
Two Way Analysis of Variance SigmaPlot v11					Analysis Summary				Mann-Whitney Analysis											DATA GtACr2-GFP								DATA control
					Column A	GtACR2			Below threshold?	P value	Mean rank of GtACR2	Mean rank of control	Mean rank diff.	Mann-Whitney U	Adjusted P Value					AUC MP								AUC MP
Data source: Data 1 in Notebook2					vs.	vs.			No	>0.999999	6.5	6.5	0	17.5	>0.999999					rats	basal	P1	P2	reovery				rats	basal	P1	P2	recovery
					Column B	control			Yes	0.002525	9	3	6	0	0.010101					20200616C	0.0298506	0.0510655	0.144094	0.0381952				20210304A	0.0375323	0.0364312	0.0366561	0.0378672
General Linear Model									Yes	0.002525	9	3	6	0	0.010101					0.011253	0.0126588	0.0173695	0.0175376	0.0238662				20210304B	0.0284343	0.0286672	0.028497	0.0285001
					Test details				No	0.14899	7.857	4.6	3.257	8	0.59596					20210111A	0.0428552	0.10913	0.135702	0.0576181				20210304C	0.0603969	0.0584828	0.0531418	0.0610946
Dependent Variable: data					Test name	Mann-Whitney test														20210111B	0.0785758	0.178781	0.119908	0.0861082				20210304D	0.185046	0.174623	0.17009	0.127972
					Comparison for each test	Compare ranks														20210111C	0.0291246	0.0699103	0.125179	0.028466				20210304E	0.392089	0.384068	0.393503	0.416008
Normality Test:	Failed	(P < 0.050)			Multiple comparisons	Set P value threshold														20210111D	0.0432345	0.0618195	0.0499729	0.0406684
					Method	Bonferroni-Dunn method														20210112E	0.0499235	0.383034	0.132322	0.0734473
Equal Variance Test:	Passed	(P = 0.064)			Alpha	0.05
					Number of tests performed	4
					Number of rows omitted	0
																				DATA GtACr2-GFP								DATA control
																				AUC MP (%)								AUC MP (%)
																				rats	basal	P1	P2	reovery				rats	basal	P1	P2	recovery
																				20200616C	100	171.07	482.717	127.955				20210304A	100	97.0664	97.6656	100.892
																				20200616D	100	137.213	138.541	188.535				20210304B	100	100.819	100.221	100.232
																				20210111A	100	254.648	316.653	134.448				20210304C	100	96.8307	87.9875	101.155
																				20210111B	100	227.526	152.601	109.586				20210304D	100	94.3673	91.9174	69.1568
																				20210111C	100	240.039	429.807	97.7387				20210304E	100	97.9541	100.361	106.1
																				20210111D	100	142.987	115.586	94.0648
																				20210112E	100	767.243	265.05	147.12

## Sheet: Abd activity (AUC)
Two Way Analysis of Variance SigmaPlot v11					Analysis Summary				Mann-Whitney Analysis											DATA GtACr2-GFP								DATA control
																				AUC Abd								AUC Abd
Data source: Data 1 in Notebook3					Column A	GtACr2				Below threshold?	P value	Mean rank of GtACr2	Mean rank of control	Mean rank diff.	Mann-Whitney U	Adjusted P Value				rats	basal	P1	P2	reovery				rats	basal	P1	P2	reovery
					vs.	vs.			baseline	No	>0.999999	5.5	5.5	0	12.5	>0.999999				20210111A	0.0204356	0.0241161	0.0336134	0.0187012				20210304A	100	107.373	104.865	123.241
Balanced Design					Column B	control			P1	Yes	0.007937	8	3	5	0	0.031746				20210111B	0.0104608	0.0151323	0.0285324	0.0134708				20210304B	100	98.3826	87.3061	105.148
									P2	Yes	0.007937	8	3	5	0	0.031746				20210111C	0.00840216	0.0108458	0.0192119	0.0110133				20210304C	100	103.044	108.958	188.643
Dependent Variable: data					Test details				recovery	No	0.547619	4.8	6.2	-1.4	9	>0.999999				20210111D	0.00640489	0.0144903	0.00964849	0.00612379				20210304D	100	104.864	102.151	101.445
					Test name	Mann-Whitney test														20210112E	0.00687538	0.0206811	0.0180506	0.00713619				20210304E	100	103.751	98.3997	108.812
Normality Test:	Failed	(P < 0.050)			Comparison for each test	Compare ranks
					Multiple comparisons	Set P value threshold
Equal Variance Test:	Failed	(P < 0.050)			Method	Bonferroni-Dunn method
					Alpha	0.05
					Number of tests performed	4
					Number of rows omitted	0
																				DATA GtACr2-GFP								DATA control
																				AUC Abd(%)								AUC Abd (%)
																				rats	basal	P1	P2	reovery				rats	basal	P1	P2	reovery
																				20210111A	100	118.01	164.484	91.5126				20210304A	100	107.373	104.865	123.241
																				20210111B	100	144.657	272.755	128.774				20210304B	100	98.3826	87.3061	105.148
																				20210111C	100	129.084	228.654	131.077				20210304C	100	103.044	108.958	188.643
																				20210111D	100	226.238	150.643	95.6112				20210304D	100	104.864	102.151	101.445
																				20210112E	100	300.799	262.539	103.793				20210304E	100	103.751	98.3997	108.812

## Sheet: apnea duration
DATA GtACr2-GFP					DATA control				apnea duration				missed res cycles
	apnea duration	1 resp cycle	missed res cycles		rats	apnea duration	missed res cycles		control	Data Set-B			control	Data Set-B
20200214A	19.9704	0.46992	42.4975		20210304A	0	0		vs.	vs.			vs.	vs.
20200214B	12.0673	0.677452	17.8128		20210304B	0	0		GtACR2-muGFP	Data Set-A			GtACR2-muGFP	Data Set-A
20200214C	5.62	0.60736	9.25317		20210304C	0	0
20200616A	9.018	0.549883	16.3998		20210304D	0	0		Unpaired t test with Welch's correction				Unpaired t test
20200616B	11.05	0.574235	19.243		20210304E	0	0		P value	<0.0001			P value	0.0025
20200616C	8.8437	0.441849	20.0152						P value summary	****			P value summary	**
20200616D	3.213	0.720398	4.46004						Significantly different (P < 0.05)?	Yes			Significantly different (P < 0.05)?	Yes
20210111A	8.97	0.595711	15.0576						One- or two-tailed P value?	Two-tailed			One- or two-tailed P value?	Two-tailed
20210111B	7.3931	0.567587	13.0255						Welch-corrected t, df	t=6.839, df=11.00			t, df	t=3.616, df=15
20210111C	2.03	0.514898	3.94253
20210111D	12.12	0.776542	15.6076						How big is the difference?				How big is the difference?
20210112E	11.81	0.672179	17.5697						Mean of column A	9.342			Mean of column A	16.24
									Mean of column B	0			Mean of column B	0
average	9.34213		16.2404						Difference between means (B - A) ± SEM	-9.342 ± 1.366			Difference between means (B - A) ± SEM	-16.24 ± 4.491
SD	4.7318		9.85317						95% confidence interval	-12.35 to -6.336			95% confidence interval	-25.81 to -6.667
confidence 95%	3.008		6.2603						R squared (eta squared)	0.8096			R squared (eta squared)	0.4657
bottom limit	6.33413		9.98008
upper limit	12.3501		22.5007						Data analyzed				Data analyzed
n	12		12						Sample size, column A	12			Sample size, column A	12
									Sample size, column B	5			Sample size, column B	5
