# Supplementary material for: Selective transduction and photoinhibition of pre-Bötzinger complex neurons that project to the facial nucleus in rats affects nasofacial activity
Source: eLife. 2023 Sep 29;12:e85398. doi: 10.7554/eLife.85398 (PMC10653671; doi:10.7554/eLife.85398)
Supplement: Figure 3—source data 1. [file elife-85398-fig3-data1.xlsx]

## Sheet: SAP
Two Way Analysis of Variance SigmaPlot v11				Analysis Summary				Mann-Whitney Analysis													DATA DATA peBotC to 7n										DATA control								SAP preBotC--7n						SAP preBotC--7n
																					SAP										SAP
Two Way Analysis of Variance				Table Analyzed	SAP				Below threshold?	P value	Mean rank of preBotC to 7n	Mean rank of control	Mean rank diff.	Mann-Whitney U	Adjusted P Value																								rats	basal	P1	P2	recovery		rats	basal	P1	P2	recovery
								off	No	>0.999999	6	6	0	15	>0.999999						time	20200618A	20200618B	20210114A	20210114B	20210318A	20210318B				time	20210304A	20210304B	20210304C	20210304D	20210304E			20200618A	128.111	127.007	127.946	125.784		20200618A	100	99.1389	99.8715	98.1842
Data source: Data 1 in HR - normality test				Column A	preBotC to 7n			on - P1	No	0.082251	4.333	8	-3.667	5	0.329004						0	119.446	115.123	132.596	145.25	166.835	116.381				0	104.782	130.7	133.134	147.076	134.653			20200618B	115.052	116.37	117.149	114.182		20200618B	100	101.146	101.822	99.2441
				vs.	vs.			on - P2	No	0.246753	7.167	4.6	2.567	8	0.987013						1	126.77	117.244	135.579	145.025	170.786	113.386				1	103.905	129.395	137.028	150.254	135.316			20210114A	134.511	131.431	135.845	135.466		20210114A	100	97.7102	100.992	100.71
General Linear Model				Column B	control			off	No	0.536797	5.333	6.8	-1.467	11	>0.999999						2	125.73	115.972	134.268	145.014	172.235	115.993				2	103.686	131.729	133.497	149.618	138.214			20210114B	143.093	134.315	146.155	143.759		20210114B	100	93.8655	102.14	100.466
																					3	121.988	115.861	135.761	141.84	173.475	111.298				3	104.733	130.799	134.688	150.077	135.28			20210318A	168.433	164.224	171.258	170.364		20210318A	100	97.5014	101.677	101.147
Dependent Variable: data				Test details																	4	129.46	115.808	133.822	147.177	169.402	114.863				4	106.069	132.283	135.919	149.235	137.158			20210318B	115.61	92.8047	110.591	116.267		20210318B	100	80.2736	95.6579	100.568
				Test name	Mann-Whitney test																5	127.298	113.29	133.758	147.488	169.446	112.434				5	107.398	131.246	134.588	148.486	135.472
Normality Test:	Failed	(P < 0.050)		Comparison for each test	Compare ranks																6	124.944	114.569	133.931	140.577	168.87	115.94				6	105.99	130.417	134.896	148.946	138.525
				Multiple comparisons	Set P value threshold																7	130.052	115.411	130.948	144.271	167.162	115.952				7	104.828	128.231	134.408	148.24	134.215
Equal Variance Test:	Failed	(P < 0.050)		Method	Bonferroni-Dunn method																8	127.649	112.974	134.686	150.401	169.195	116.45				8	106.12	128.123	133.211	150.672	136.569
				Alpha	0.05																9	126.307	115.8	132.449	145.479	169.946	116.136				9	104.953	130.517	136.649	147.514	134.54
																					10	131.64	115.996	135.388	141.697	169.164	114.735				10	106.907	130.676	133.699	149.228	135.675
				Number of tests performed	4																11	124.768	116.882	131.783	148.128	167.234	115.786				11	103.801	130.65	132.93	147.385	136.168
				Number of rows omitted	0																12	126.449	116.242	135.317	147.843	166.584	114.099				12	105.568	131.918	135.435	148.789	133.925
																					13	130.688	114.374	134.048	138.82	163.848	116.44				13	106.519	131.358	133.068	147.042	136.786
																					14	125.936	114.428	134.139	146.765	166.695	113.067				14	105.957	131.48	133.962	148.947	135.159
																					15	126.259	113.632	135.078	145.703	171.442	116.906				15	106.993	130.118	135.022	148.947	135.409
																					16	130.111	116.072	131.92	142.889	168.509	114.56				16	107.398	129.64	132.235	149.154	135.392
				Statistics - only period P1																	17	123.063	114.714	134.65	148.001	167.552	105.884				17	106.806	132.367	133.313	149.711	135.546
																					18	128.37	113.89	130.344	131.753	160.39	95.8726				18	108.451	129.929	133.941	149.475	135.348
				Normality Test:	Failed	(P < 0.050)															19	129.637	114.88	128.839	131.055	159.488	90.6142				19	107.333	131.444	133.856	150.872	136.443
																					20	125.446	117.157	130.784	128.008	164.271	87.7115				20	104.59	129.522	136.686	148.61	135.901
																					21	131.577	116.417	133.459	136.693	168.613	89.1898				21	105.023	129.169	130.481	150.497	135.38
				Test execution ended by user request, Rank Sum Test begun																	22	127.663	118.27	135.677	140.405	173.57	94.0277				22	106.355	131.444	133.389	148.697	137.55
																					23	126.094	118.238	133.809	149.234	172.474	94.4485				23	103.842	129.789	134.055	150.736	134.261
				Mann-Whitney Rank Sum Test	Thursday, November 24, 2022, 9:18:29 AM																24	129.672	117.024	136.344	149.78	172.98	97.088				24	104.509	130.371	132.766	148.059	136
																					25	124.314	117.749	135.785	146.709	173.334	101.071				25	105.782	131.286	138.384	148.964	134.612
				Data source: Data 1 in Notebook2																	26	130.349	116.156	136.872	146.943	174.68	102.611				26	105.013	131.414	134.871	147.928	136.169
																					27	129.214	115.92	135.375	151.635	171.45	107.309				27	105.607	129.945	136.561	148.871	135.881
				Group	N	Missing	Median	0.25	0.75												28	127.075	116.451	134.392	141.147	169.617	106.13				28	103.878	129.569	135.517	147.097	136.321
				preBotC to 7n	6	0	97.606	93.865	99.139												29	130.458	116.042	136.124	142.348	172.334	111.901				29	105.831	127.464	132.963	148.854	135.706
				control	5	0	100.058	99.517	100.366												30	130.242	115.066	134.079	152.189	173.654	111.996				30	103.533	129.607	137.368	148.175	134.383
																					31	125.052	115.96	135.12	145.732	170.638	114.935				31	105.179	130.223	130.278	149.472	137.646
				Mann-Whitney U Statistic= 5.000																	32	128.077	114.591	134.056	146.61	168.872	116.133				32	104.532	130.923	135.66	148.466	134.841
																					33	130.496	114.75	133.728	143.728	166.283	116.27				33	105.19	132.123	133.715	148.825	137.094
				T = 40.000 n(small)= 5 n(big)= 6 P(est.)= 0.083 P(exact)= 0.082																	34	124.196	114.97	135.935	145.493	169.898	118.267				34	105.359	130.775	135.042	149.505	134.831
																					35	129.653	117.6	133.741	152.752	171.091	116.907				35	105.379	130.255	132.427	148.88	135.933
																					36	127.996	116.901	134.449	145.404	168.955	118.471				36	106.718	129.075	132.929	151.045	134.413
																					37	122.944	115.158	135.661	142.106	167.3	116.561				37	105.132	129.135	134.782	150.306	135.056
																					38	128.256	117.249	132.739	151.174	167.928	118.383				38	106.683	128.769	133.48	151.297	135.298
																					39	127.922	113.36	137.085	147.887	171.918	112.888				39	104.973	130.012	135.208	147.907	136.337
																					40	123.846	115.093	133.815	145.531	174.148	117.31				40	104.441	131.094	137.889	150.818	137.968
																					41	131.167	114.937	133.466	145.842	171.531	114.791				41	104.66	131.158	133.709	150.032	134.788
																					42	129.517	113.96	135.497	142.614	167.929	115.471				42	101.949	129.01	135.21	151.076	136.465
																					43	124.287	115.401	133.556	147.407	172.108	115.034				43	104.073	130.262	134.288	147.726	135.192
																					44	128.769	115.508	136.134	152.421	170.471	115.083				44	103.658	128.47	136.05	149.131	137.868
																					45	129.664	115.275	133.93	143.118	173.571	116.671				45	104.822	130.614	132.616	145.318	136.137
																					46	123.199	117.327	135.517	143.986	169.939	112.868				46	102.802	130.428	134.216	148.989	136.552
																					47	128.392	115.705	134.455	146.185	165.357	117.625				47	103.985	131.148	133.948	147.012	135.797
																					48	125.154	115.196	135.403	147.416	169.733	113.982				48	102.133	129.803	132.868	148.654	135.162
																					49	123.318	115.33	134.002	149.484	171.592	117.452				49	103.187	128.823	134.934	147.781	136.72
																					50	129.363	115.373	135.798	146.7	172.598	115.884				50	101.027	128.796	134.796	151.187	136.068
																					51	124.145	116.403	134.211	143.322	166.714	120.185				51	103.362	128.816	133.835	148.725	137.745
																					52	126.728	116.255	137.045	150.769	166.168	115.618				52	99.9766	130.69	135.781	149.807	134.426
																					53	127.825	115.023	134.739	148.429	166.573	119.325				53	101.707	130.536	133.709	148.518	136.575
																					54	123.532	115.878	136.16	144.796	169.281	117.672				54	102.181	131.617	134.725	150.051	134.677
																					55	127.508	115.298	134.514	144.787	171.128	120.275				55	102.198	130.029	133.787	147.708	136.378
																					56	127.157	113.753	136.456	146.708	171.399	116.552				56	102.879	129.289	134.03	150.015	134.129
																					57	123.262	114.705	134.465	148.709	170.882	119.541				57	103.189	129.839	131.897	147.989	135.52
																					58	127.567	114.013	136.733	147.807	167.792	117.946				58	103.374	130.502	134.959	150.95	135.892
																					59	125.899	115.263		143.792	165.179	121.284				59	104.487	132.959	135.524	148.971	138.208
																					60	107.782	115.703		147.011	167.293	119.173				60	102.6	132.683	135.893	150.449	135.338
																					61	114.307	115.113		149.333	168.943	122.452				61	102.093	131.442	136.059	150.728	136.689
																					62	123.06	115.374		144.109	172.484	118.66				62	102.174	131.014	137.158	150.321	136.465
																					63		119.653		143.171	173.986	121.581				63	99.6812	130.44	133.865	150.184	136.942
																					64		108.698		147.051	170.407	118.131				64	100.891	130.309	134.534	149.79	136.54
																					65		112.977		147.653	169.243	119.986				65	102.364	129.958	135.642	149.91	135.794
																					66		111.25		146.516						66	101.221	130.611	133.937	149.054	137.273
																					67				142.998						67	102.06	131.365	135.945	149.942	136.547
																					68				149.35						68	101.612	131.214	134.154	148.138	136.345
																					69				149.299						69	102.598	131.404	134.472	149.981	135.229
																					70				146.841						70	103.17	131.741	135.446	150.382	138.325
																					80				141.777						71	103.094		134.63	150.941	136.472
																					81				148.103						72	102.432		134.188	148.713	139.61
																					82				147.775						73	102.846		135.413	151.155	137.053
																					83				142.346						74	100.384		134.226	151.12	138.063
																					84				144.865						75	103.107		136.135	152.172	134.886
																					85				150.132						76			135.677	149.934	137.17
																					86				143.34						77				150.126	136.63
																					87				140.801						78				149.419	137.254
																					88				150.733						79					136.756
																					89				145.772						80					137.665
																					90				142.912						81					134.566
																					91				144.483						82					136.223
																					92				149.995
																					93				146.348
																					94				141.26
																					95

## Sheet: HR
Two Way Analysis of Variance SigmaPlot v11				Analysis Summary				Mann-Whitney Analysis													DATA preBotC to 7n										DATA control
																					HR										HR								HR preBotC--7n						HR preBotC--7n
Two Way Analysis of Variance				Table Analyzed	HR				Below threshold?	P value	Mean rank of preBotC to 7n	Mean rank of control	Mean rank diff.	Mann-Whitney U	Adjusted P Value
								off	No	>0.999999	6	6	0	15	>0.999999						time	20200618A	20200618B	20210114A	20210114B	20210318A	20210318B				time	20210304A	20210304B	20210304C	20210304D	20210304E			rats	basal	P1	P2	recovery		rats	basal	P1	P2	recovery
Data source: Data 1 in Notebook2				Column A	preBotC to 7n			on - P1	No	0.536797	5.333	6.8	-1.467	11	>0.999999						0	401.679	355.029	324.173	382.628	325.076	331.341				0	360.682	304.696	376.857	319.528	317.433			20200618A	403.639	403.122	399.641	400.026		20200618A	100	99.8719	99.0096	99.1048
				vs.	vs.			on - P2	No	0.662338	5.5	6.6	-1.1	12	>0.999999						1	415.622	349.538	326.915	393.042	332.993	323.824				1	360.833	309.279	378.514	317.295	315.171			20200618B	351.979	355.739	353.094	354.411		20200618B	100	101.068	100.317	100.691
General Linear Model				Column B	control			off	No	0.536797	5.333	6.8	-1.467	11	>0.999999						2	397.969	352.119	326.667	390.382	333.372	321.032				2	356.953	307.292	381.643	317.672	316.665			20210114A	325.998	323.697	321.728	324.581		20210114A	100	99.2944	98.6901	99.5654
																					3	405.465	357.62	325.203	384.407	330.37	323.452				3	358.09	305.69	381.791	315.832	314.139			20210114B	391.671	400.365	387.011	406.092		20210114B	100	102.22	98.8103	103.682
Dependent Variable: data				Test details																	4	408.227	356.068	324.752	386.506	332.19	326.743				4	358.258	305.665	378.529	320.458	314.239			20210318A	331.502	327.95	318.251	330.159		20210318A	100	98.9287	96.0028	99.5951
				Test name	Mann-Whitney test																5	397.829	352.674	326.528	383.776	338.036	325.508				5	360.969	307.6	381.303	317.282	314.372			20210318B	329.082	315.05	313	316.86		20210318B	100	95.736	95.1132	96.2862
Normality Test:	Failed	(P < 0.050)		Comparison for each test	Compare ranks																6	402.479	359.424	327.209	380.11	331.707	326.028				6	359.281	303.777	377.852	316.202	316.531
				Multiple comparisons	Set P value threshold																7	408.479	354.343	323.865	385.646	327.788	326.64				7	356.43	300.074	379.245	320.175	317.854
Equal Variance Test:	Passed	(P = 0.200)		Method	Bonferroni-Dunn method																8	390.445	355.832	321.824	380.563	325.889	326.992				8	357.856	294.475	382.166	319.274	309.059
				Alpha	0.05																9	405.405	352.241	324.158	370.457	336.33	330.489				9	361.767	296.8	384.615	314.216	315.238
																					10	402.255	352.347	325.193	386.542	332.34	324.698				10	355.417	301.298	385.285	317.045	309.948
				Number of tests performed	4																11	392.233	350.277	325.062	380.664	334.553	334.942				11	360.423	301.588	382.361	318.243	313.84
				Number of rows omitted	0																12	411.288	351.245	326.594	372.823	329.651	328.335				12	361.446	312.928	383.387	319.366	311.074
																					13	397.302	356.355	326.929	374.817	330.509	334.656				13	359.515	312.447	386.282	318.304	315.38
																					14	397.723	352.068	327.527	374.046	330.794	330.286				14	359.032	314.05	378.549	313.548	310.519
																					15	414.333	358.788	325.81	380.126	329.27	331.492				15	361.061	311.838	384.115	318.623	314.433
																					16	397.145	352.846	325.405	391.227	331.152	320.64				16	362.244	311.545	389.211	314.727	320.634
																					17	399.869	352.941	324.324	371.046	325.542	317.358				17	364.203	305.972	380.53	318.756	309.773
																					18	409.005	349.137	325.334	379.747	328.51	318.514				18	362.993	305.957	387.087	315.286	314.461
																					19	396.998	355.313	321.326	406.281	330.515	309.809				19	358.876	309.894	379.653	311.827	310.043
				Statistics - only period P1																	20	399.061	353.504	323.798	403.27	327.897	317.505				20	356.576	309.845	379.473	308.876	311.732
																					21	401.018	358.919	323.45	414.068	332.42	324.73				21	357.846	306.187	378.21	309.345	311.291
				Normality Test:	Passed	(P = 0.354)															22	390.985	349.802	324.101	402.341	323.046	313.759				22	355.963	299.285	377.566	310.859	317.822
																					23	405.493	351.549	321.595	399.54	326.986	312.436				23	351.131	287.4	379.722	310.303	313.355
				Equal Variance Test:	Passed	(P = 0.313)															24	401.375	357.438	321.475	386.669	322.71	312.589				24	353.332	297.088	378.223	309.096	317.201
																					25	394.15	352.731	323.266	371.924	318.771	311.362				25	353.447	295.634	378.549	306.439	313.681
				Group Name	N	Missing	Mean	Std Dev	SEM												26	410.681	350.74	321.524	389.704	318.548	317.408				26	354.856	301.888	378.327	312.045	313.301
				preBotC to 7n	6	0	99.52	2.215	0.904												27	392.696	355.588	319.762	373.586	317.198	310.68				27	353.749	299.661	379.014	309.157	316.079
				control	5	0	100.233	0.749	0.335												28	403.18	355.143	318.763	374.925	314.942	314.266				28	355.182	295.662	380.689	309.617	308.149
																					29	406.215	355.807	323.13	379.205	314.387	314.075				29	354.773	294.275	379.23	307.545	307.62
				Difference	-0.713																30	389.146	353.102	318.4	363.592	315.586	317.089				30	345.26	297.703	377.894	312.024	307.877
																					31	400.796	353.682	314.136	368.285	312.68	307.951				31	355.03	295.529	374.584	307.578	313.585
				t = -0.683 with 9 degrees of freedom. (P = 0.512)																	32	410	350.683	318.04	370.634	321.636	314.633				32	351.073	298.593	372.9	310.251	308.902
																					33	398.717	353.584	321.463	366.477	312.252	317.006				33	354.444	305.601	376.998	309.033	308.35
				95 percent confidence interval for difference of means: -3.076 to 1.649																	34	394.408	355.566	325.06	370.02	327.85	313.634				34	351.133	300.655	377.823	310.594	310.326
																					35	404.908	349.356	324.022	361.317	320.101	309.145				35	348.957	295.618	376.467	309.595	308.218
				The difference in the mean values of the two groups is not great enough to reject the possibility that the difference is due to random sampling variability. There is not a statistically significant difference between the input groups (P = 0.512).																	36	390.099	356.084	327.521	364.246	327.508	314.554				36	353.489	289.647	380.29	308.492	311.432
																					37	399.19	356.87	324.319	384.615	323.553	312.288				37	347.545	289.518	377.903	305.907	313.738
																					38	409.877	355.397	324.931	366.303	321.382	314.567				38	354.186	287.379	375	308.041	308.393
																					39	388.995	349.08	319.967	364.487	322.591	309.601				39	352.454	290.602	378.552	307.001	311.282
																					40	401.234	354.612	315.877	373.965	321.985	313.13				40	355.04	298.382	375.38	302.09	313.161
																					41	410.665	360.045	319.272	368.924	320.748	321.617				41	348.55	294.31	376.41	308.213	305.673
																					42	393.471	357.797	317.661	365.549	327.852	306.143				42	353.312	297.106	375.517	302.763	306.351
																					43	401.913	348.758	321.757	380.825	314.483	315.461				43	347.281	289.329	381.366	303.947	305.168
																					44	414.866	354.602	315.869	358.762	319.774	314.013				44	350.462	290.241	378.147	303.649	309.838
																					45	395.018	350.061	326.494	375.901	315.938	315.576				45	348.281	283.417	375.686	306.254	311.57
																					46	393.786	356.479	319.374	383.585	312.832	314.501				46	353.728	288.994	378.541	303.189	309.81
																					47	402.482	347.369	320.729	359.635	324.594	310.755				47	350.584	296.133	373.511	306.732	313.195
																					48	390.704	356.537	324.28	367.644	319.441	309.069				48	347.911	301.321	380.609	311.087	309.194
																					49	407.279	358.761	325.409	370.809	320.233	315.732				49	349.329	298.934	380.387	314.842	309.462
																					50	404.891	356.314	326.271	372.554	313.032	321.984				50	347.255	293.549	378.382	309.081	306.214
																					51	390.573	349.521	323.45	361.505	327.85	319.56				51	344.159	289.394	377.358	308.991	309.378
																					52	403.907	356.734	323.922	365.45	324.522	310.054				52	343.213	300.979	374.28	306.123	311.348
																					53	391.782	354.416	322.883	363.862	314.772	313.64				53	345.638	300.232	371.631	309.438	309.278
																					54	395.133	351.948	324.126	367.705	326.64	318.073				54	347.187	297.308	374.127	310.454	313.52
																					55	414.904	354.848	325.203	371.14	323.95	315.851				55	349.718	302.585	375.033	311.145	311.042
																					56	400.042	356.669	325.672	369.287	326.085	318.766				56	346.787	301.924	380.095	309.773	314.614
																					57	396.433	349.677	324.583	368.681	327.274	318.572				57	349.981	298.666	371.917	305.378	310.042
																					58	410.272	351.797	323.56	372.657	319.188	317.582				58	345.936	301.711	375.331	306.492	310.551
																					59	390.996	356.725		359.931	326.958	315.427				59	350.041	307.447	375.215	310.164	301.448
																					60	398.185	352.081		369.478	331.652	318.217				60	347.743	302.411	371.272	311.257	310.853
																					61	405.311	353.528		367.339	331.377	320.148				61	351.368	311.456	378.426	309.949	312.866
																					62	411.85	360.345		361.738	327.862	320.692				62	344.585	309.523	377.358	308.161	309.744
																							350.974		369.377	328.163	315.303				63	353.07	305.296	379.338	309.176	308.976
																							350.169		367.578	332.875	317.382				64	349.808	307.155	375.156	306.517	311.329
																							355.936		376.63	331.791	312.813				65	345.826	309.073	377.67	305.149	311.002
																							361.35		375.63						66	351.904	311.788	377.632	308.676	319.514
																									373.976						67	355.459	312.104	388.85	306.124	314.183
																									372.495						68	348.345	315.03	380.952	312.296	309.938
																									372.451						69	349.14	319.572	385.266	308.392	310.445
																									372.485						70	352.802	317.95	375.197	314.505	308.124
																									379.406						71	350.774		383.575	311.154	308.886
																									378.525						72	354.477		382.705	310.881	311.68
																									385.484						73	356.815		378.074	313.656	310.798
																									382.01						74	351.488		384.225	310.96	311.122
																									384.673						75	354.251		384.525	310.418	315.637
																									383.083						76			384.192	310.689	316.212
																									376.872						77				309.64	318.523
																									390.208						78				314.815	319.77
																									384.598						79					319.121
																									395.334						80					314.568
																									385.75						81					320.481
																									384.441						82					313.554
																									385.293
																									383.388
																									390.512
																					87		257.219
																					88		266.659
																					89		286.33
																					90		234.269
																					91		289.43
																					92		309.53
																					93		317.985
																					94		325.621
																					95		310.567
																					96		323.705
																					97		316.763
																					98		327.731
																					99		323.243
																					100		315.351
																					101		337.419
																					102		314.105
																					103		309.203

## Sheet: DIA activity (AUC)
Two Way Analysis of Variance SigmaPlot v11					Analysis Summary				Mann-Whitney Analysis											DATA preBotC to 7n									DATA control							DATA peBotC to 7n										DATA control
										Below threshold?	P value	Mean rank of GtACR2	Mean rank of control	Mean rank diff.	Mann-Whitney U	Adjusted P Value				AUC DIA									AUC DIA							DIA AMPL										DIA amp
Two Way Analysis of Variance					Table Analyzed	DIA data			off	No	>0.999999	6	6	0	15	>0.999999				rats	off	P1	P2	off					rats	basal	P1	P2	5 cycles after stim			time	20200618A	20200618B	20210114A	20210114B	20210318A	20210318B
									on - P1	No	0.930736	5.833	6.2	-0.3667	14	>0.999999				20200618A	0.219061	0.22405	0.237923	0.219432					20210304A	0.047459	0.0483704	0.0491387	0.044667			0	0.274069	0.190614	0.018027	0.076675	0.070615	0.047818				time	20210304A	20210304B	20210304C
Data source: Data 1 in DIA activity					Column A	preBotC to 7n			on - P2	No	0.662338	6.5	5.4	1.1	12	>0.999999				20200618B	0.200432	0.215129	0.20069	0.204446					20210304B	0.0692843	0.0699142	0.0695101	0.0725152			1	0.257593	0.189728	0.017233	0.076883	0.067096	0.045844				0	0.04232	0.046328	0.030767
					vs.	vs.			off	No	0.246753	7.167	4.6	2.567	8	0.987013				20210114A	0.025156	0.0270309	0.0248302	0.027383					20210304C	0.0336295	0.033256	0.0327769	0.0322073			2	0.276822	0.208914	0.016581	0.072428	0.069849	0.048776				1	0.041436	0.051601	0.027386
General Linear Model					Column B	control														20210114B	0.102914	0.0923859	0.107734	0.098204					20210304D	0.0360688	0.0370723	0.0379116	0.0340078			3	0.255764	0.207951	0.018094	0.071895	0.06587	0.052682				2	0.04284	0.053182	0.030478
																				20210318A	0.129201	0.0986654	0.121208	0.12464					20210304E	0.123619	0.122559	0.120695	0.120616			4	0.257821	0.189113	0.018207	0.076273	0.07307	0.047768				3	0.044089	0.047868	0.028298
Dependent Variable: data					Test details															20210318B	0.069887	0.0666896	0.0749137	0.0694032												5	0.296792	0.188827	0.018313	0.072036	0.074621	0.048118				4	0.045989	0.049142	0.029667
					Test name	Mann-Whitney test																														6	0.255191	0.188486	0.017981	0.075869	0.069496	0.046955				5	0.04123	0.052065	0.029305
Normality Test:	Failed	(P < 0.050)			Comparison for each test	Compare ranks																														7	0.283334	0.201594	0.017656	0.079262	0.071819	0.04604				6	0.043041	0.049157	0.027932
					Multiple comparisons	Set P value threshold																														8	0.250968	0.193869	0.017514	0.085113	0.071306	0.046243				7	0.042702	0.046622	0.026631
Equal Variance Test:	Failed	(P < 0.050)			Method	Bonferroni-Dunn method																														9	0.26231	0.192746	0.018563	0.076082	0.073166	0.045869				8	0.04551	0.049511	0.02734
					Alpha	0.05														DATA preBotC to 7n									DATA control							10	0.250808	0.196295	0.017313	0.070632	0.076426	0.048769				9	0.043137	0.051204	0.029857
																				AUC DIA (%)									AUC DIA (%)							11	0.281854	0.186472	0.016783	0.077934	0.075184	0.046161				10	0.046147	0.047923	0.027293
					Number of tests performed	4														rats	off	P1	P2	off					rats	basal	P1	P2	5 cycles after stim			12	0.263552	0.190934	0.015402	0.076821	0.075847	0.052494				11	0.043182	0.048759	0.028157
					Number of rows omitted	0														20200618A	100	102.278	108.611	100.169					20210304A	100	101.92	103.539	94.1169			13	0.267926	0.185908	0.017551	0.084001	0.075522	0.046007				12	0.043888	0.051166	0.029315
																				20200618B	100	107.333	100.129	102.003					20210304B	100	100.909	100.326	104.663			14	0.269658	0.199559	0.017312	0.073681	0.072601	0.049302				13	0.045129	0.048298	0.030957
																				20210114A	100	107.453	98.705	108.853					20210304C	100	98.8895	97.4647	95.771			15	0.289528	0.190858	0.016825	0.071592	0.071556	0.047851				14	0.042705	0.047445	0.02943
																				20210114B	100	89.7705	104.684	95.4238					20210304D	100	102.782	105.109	94.2862			16	0.252868	0.192081	0.016593	0.069753	0.056816	0.030139				15	0.046822	0.048679	0.027988
																				20210318A	100	76.3657	93.813	96.4696					20210304E	100	99.1428	97.6347	97.5709			17	0.249952	0.148412	0.014329	0.046818	0.053321	0.022315				16	0.044057	0.053605	0.029579
																				20210318B	100	95.4249	107.193	99.3078												18	0.227917	0.187997	0.013399	0.049344	0.051485	0.032429				17	0.045444	0.052725	0.027749
					Statistics - only period P1																															19	0.273651	0.195633	0.013864	0.053844	0.052309	0.037935				18	0.045639	0.048803	0.028176
																																				20	0.232566	0.189219	0.014502	0.059731	0.057737	0.0362				19	0.043727	0.053568	0.028484
					Normality Test:	Passed	(P = 0.164)																													21	0.231254	0.18789	0.015943	0.06604	0.063614	0.043486				20	0.043813	0.049628	0.031098
																																				22	0.267951	0.192564	0.015994	0.067066	0.070743	0.045205				21	0.04254	0.052192	0.028549
					Equal Variance Test:	Passed	(P = 0.066)																													23	0.25511	0.187277	0.016756	0.067873	0.072169	0.044466				22	0.04506	0.045902	0.028062
																																				24	0.25287	0.190389	0.015801	0.064505	0.069639	0.047105				23	0.04322	0.050948	0.031612
					Group Name	N	Missing	Mean	Std Dev	SEM																										25	0.250622	0.204361	0.016857	0.071487	0.068575	0.048329				24	0.04426	0.050858	0.027274
					preBotC to 7n	6	0	96.437	12.021	4.907																										26	0.252983	0.203441	0.016264	0.08559	0.069361	0.0469				25	0.047974	0.049971	0.02909
					control	5	0	100.729	1.701	0.761																										27	0.243512	0.192838	0.01668	0.077336	0.078782	0.044818				26	0.042454	0.050441	0.029815
																																				28	0.262864	0.188083	0.014966	0.074832	0.074375	0.053499				27	0.044876	0.052917	0.028871
					Difference	-4.291																														29	0.261284	0.191183	0.01685	0.07886	0.074264	0.051091				28	0.043417	0.051405	0.028682
																																				30	0.294907	0.193165	0.016462	0.08578	0.06618	0.049528				29	0.048553	0.051872	0.029503
					t = -0.785 with 9 degrees of freedom. (P = 0.453)																															31	0.280602	0.200723	0.016195	0.080774	0.078113	0.047324				30	0.041218	0.048697	0.029784
																																				32	0.281692	0.19603	0.017259	0.081657	0.075609	0.048628				31	0.04196	0.049456	0.029387
					95 percent confidence interval for difference of means: -16.663 to 8.080																															33	0.292311	0.177143	0.016719	0.084828	0.077309	0.049067				32	0.048506	0.04919	0.028239
																																				34	0.282065	0.191364	0.01715	0.08414	0.075733	0.050422				33	0.044794	0.050478	0.031518
																																				35	0.291194	0.211696	0.018183	0.079127	0.071534	0.052032				34	0.043813	0.052964	0.029339
																																				36	0.277465	0.188204	0.017048	0.084022	0.071948	0.049605				35	0.045764	0.050376	0.028594
																																				37	0.280574	0.198956	0.016286	0.077188	0.080337	0.050015				36	0.044369	0.053104	0.028359
																																				38	0.283932	0.19979	0.016732	0.080819	0.073826	0.05362				37	0.043798	0.047229	0.028565
																																				39	0.265343	0.208047	0.017188	0.084723	0.07604	0.048417				38	0.042419	0.053295	0.030193
																																				40	0.261333	0.205132	0.017933	0.079129	0.07164	0.047992				39	0.042205	0.052727	0.027822
																																				41	0.269985	0.216631	0.018665	0.080519	0.080437	0.046417				40	0.04463	0.051024	0.027607
																																				42	0.285981	0.216207	0.016539	0.080629	0.071492	0.04983				41	0.044897	0.051119	0.028299
																																				43	0.260957	0.178951	0.016304	0.083279	0.079303	0.046953				42	0.042045	0.052704	0.027934
																																				44	0.267687	0.188254	0.01752	0.077712	0.077845	0.051752				43	0.042636	0.049665	0.030191
																																				45	0.258951	0.196692	0.017878	0.077966	0.075549	0.04876				44	0.046456	0.05161	0.027725
																																				46	0.269479	0.193264	0.019173	0.080039	0.07567	0.048331				45	0.04623	0.050552	0.031761
																																				47	0.276861	0.193354	0.018029	0.068376	0.072591	0.049349				46	0.04365	0.050445	0.027383
																																				48	0.276632	0.186895	0.017979	0.08257	0.074129	0.048586				47	0.045446	0.048009	0.029003
																																				49	0.287215	0.198224	0.017931	0.078074	0.079165	0.048506				48	0.044292	0.052717	0.029626
																																				50	0.282839	0.188366	0.017599	0.07698	0.077417	0.050643				49	0.039536	0.05207	0.026775
																																				51	0.302287	0.206846	0.019145	0.085086	0.08349	0.04639				50	0.042925	0.05032	0.027411
																																				52	0.291187	0.187383	0.016975	0.078756	0.08035	0.050198				51	0.046289	0.049809	0.031174
																																				53	0.291077	0.19957	0.018679	0.082009	0.077906	0.051524				52	0.043887	0.053368	0.027198
																																				54	0.272208	0.2009	0.018162	0.077665	0.079104	0.047889				53	0.044017	0.051924	0.027212
																																				55	0.28153	0.194733	0.018606	0.080395	0.078346	0.045023				54	0.046204	0.051954	0.028793
																																				56	0.264018	0.193796	0.017689	0.080475	0.076878	0.045308				55	0.042968	0.049313	0.027221
																																				57	0.259442	0.181401	0.017914	0.083176	0.080749	0.045362				56	0.041515	0.053197	0.028356
																																				58	0.293507	0.181944	0.01807	0.08243	0.077705	0.048524				57	0.046166	0.053207	0.027658
																																				59	0.648016	0.220847		0.072871	0.073485	0.047495				58	0.042569	0.050737	0.028617
																																				60	0.313885	0.196679		0.073757	0.07932	0.049366				59	0.040241	0.049443	0.029343
																																				61	0.246047	0.206089		0.076739	0.076989	0.050439				60	0.045338	0.050471	0.029192
																																				62	0.244228	0.193001		0.07799	0.073374	0.049834				61	0.04519	0.05061	0.029146
																																						0.600396		0.076971	0.074088	0.049409				62	0.044911	0.04976	0.02651
																																						0.145894		0.075959	0.071611	0.05041				63	0.043184	0.051329	0.028861
																																						0.173214		0.074078	0.075909	0.047053				64	0.045788	0.048696	0.030165
																																						0.181907		0.076882						65	0.042825	0.052574	0.02868
																																								0.081988						66	0.043415	0.050137	0.030361
																																								0.070519						67	0.042874	0.052248	0.027327
																																								0.082977						68	0.045758	0.051944	0.028571
																																								0.080341						69	0.042727	0.051189	0.029889
																																								0.081614						70	0.041844	0.051335	0.027755
																																								0.078369						71	0.043317		0.026334
																																								0.078765						72	0.044778		0.026403
																																								0.08149						73	0.047262		0.027104
																																								0.072932						74	0.040391		0.027877
																																								0.075288						75	0.04409		0.028981
																																								0.075572						76			0.031934
																																								0.074919						77
																																								0.078686						78
																																								0.072398						79
																																								0.088221						80
																																								0.074573						81
																																								0.077112						82
																																								0.07467
																																								0.079386
[truncated: 2 more columns]

## Sheet: MP Activity (AUC)
Two Way Analysis of Variance SigmaPlot v11					Analysis Summary				Mann-Whitney Analysis											DATA preBotC to 7n								DATA control
										Below threshold?	P value	Mean rank of preotC to 7n	Mean rank of control	Mean rank diff.	Mann-Whitney U	Adjusted P Value				AUC MP								AUC MP
Two Way Analysis of Variance					Table Analyzed	MP data			baseline	No	>0.999999	6	6	0	15	>0.999999				rats	off	P1	P2	off				rats	basal	P1	P2	recovery
									P1	Yes	0.004329	3.5	9	-5.5	0	0.017316				20200618A	0.0399532	0.0248891	0.0342638	0.0495401				20210304A	0.0375323	0.0364312	0.0366561	0.0378672
Data source: Data 1 in Notebook2					Column A	preBotC to 7n			P2	Yes	0.004329	3.5	9	-5.5	0	0.017316				20200618B	0.0659958	0.0408333	0.0580099	0.0638738				20210304B	0.0284343	0.0286672	0.028497	0.0285001
					vs.	vs.			recovery	No	0.792208	6.333	5.6	0.7333	13	>0.999999				20210114A	0.20055	0.0515414	0.12722	0.126053				20210304C	0.0603969	0.0584828	0.0531418	0.0610946
General Linear Model					Column B	control														20210114B	0.208269	0.0825927	0.179094	0.231467				20210304D	0.185046	0.174623	0.17009	0.127972
																				20210318A	0.533908	0.252567	0.368184	0.800564				20210304E	0.392089	0.384068	0.393503	0.416008
Dependent Variable: data					Test details															20210318B	0.0802793	0.0574874	0.0630259	0.0603858
					Test name	Mann-Whitney test
Normality Test:	Failed	(P < 0.050)			Comparison for each test	Compare ranks
					Multiple comparisons	Set P value threshold
Equal Variance Test:	Failed	(P < 0.050)			Method	Bonferroni-Dunn method
					Alpha	0.05
																				DATA preBotC to 7n								DATA control
					Number of tests performed	4														AUC MP								AUC MP (%)
					Number of rows omitted	0														rats	off	P1	P2	off				rats	basal	P1	P2	recovery
																				20200618A	100	62.2956	85.7599	123.996				20210304A	100	97.0664	97.6656	100.892
																				20200618B	100	61.8726	87.8993	96.7845				20210304B	100	100.819	100.221	100.232
																				20210114A	100	25.7	63.4352	62.8537				20210304C	100	96.8307	87.9875	101.155
																				20210114B	100	39.6568	85.992	111.139				20210304D	100	94.3673	91.9174	69.1568
																				20210318A	100	47.3053	68.9601	149.944				20210304E	100	97.9541	100.361	106.1
																				20210318B	100	71.6092	78.5083	75.2197

## Sheet: Abd activity (AUC)
Two Way Analysis of Variance SigmaPlot v11					Analysis Summary				Mann-Whitney Analysis											DATA preBotC to 7n								DATA control
										Below threshold?	P value	Mean rank of GtACR2	Mean rank of control	Mean rank diff.	Mann-Whitney U	Adjusted P Value				AUC Abd								AUC Abd
Two Way Analysis of Variance					Table Analyzed	Abd data			off	No	>0.999999	5	5	0	10	>0.999999				rats	off	P1	P2	off				rats	basal	P1	P2	reovery
									on - P1	No	0.285714	6.25	4	2.25	5	>0.999999				20210114A	0.0108686	0.014587	0.0104957	0.0106214				20210304A	100	107.373	104.865	123.241
Data source: Data 1 in Abd activity					Column A	preBotC to 7n			on - P2	No	0.285714	3.75	6	-2.25	5	>0.999999				20210114B	0.0143261	0.0186232	0.0128843	0.0175478				20210304B	100	98.3826	87.3061	105.148
					vs.	vs.			off	No	0.111111	3.25	6.4	-3.15	3	0.444444				20210318A	0.129201	0.0986654	0.121208	0.12464				20210304C	100	103.044	108.958	188.643
General Linear Model					Column B	control														20210318B	0.00596907	0.00799377	0.00592112	0.00584327				20210304D	100	104.864	102.151	101.445
																												20210304E	100	103.751	98.3997	108.812
Dependent Variable: data					Test details
					Test name	Mann-Whitney test
Normality Test:	Failed	(P < 0.050)			Comparison for each test	Compare ranks
					Multiple comparisons	Set P value threshold
Equal Variance Test:	Passed	(P = 0.067)			Method	Bonferroni-Dunn method
					Alpha	0.05
					Number of tests performed	4														DATA preBotC to 7n								DATA control
					Number of rows omitted	0														AUC Abd								AUC Abd (%)
																				rats	off	P1	P2	off				rats	basal	P1	P2	reovery
																				20210114A	100	134.212	96.5689	97.7254				20210304A	100	107.373	104.865	123.241
																				20210114B	100	129.995	89.9361	122.489				20210304B	100	98.3826	87.3061	105.148
																				20210318A	100	76.3657	93.813	96.4696				20210304C	100	103.044	108.958	188.643
																				20210318B	100	133.92	99.1967	97.8925				20210304D	100	104.864	102.151	101.445
																												20210304E	100	103.751	98.3997	108.812
					Statistics - only period P1
					Normality Test:	Failed	(P < 0.050)
					Test execution ended by user request, Rank Sum Test begun
					Mann-Whitney Rank Sum Test	Thursday, November 24, 2022, 9:22:51 AM
					Data source: Data 1 in DIA - P1 period
					Group	N	Missing	Median	0.25	0.75
					preBotC to 7n	4	0	131.958	103.18	134.066
					control	5	0	103.751	101.879	105.491
					Mann-Whitney U Statistic= 5.000
					T = 25.000 n(small)= 4 n(big)= 5 P(est.)= 0.270 P(exact)= 0.286

## Sheet: apnea duration
DATA preBotC--7n					DATA control				apnea duration				missed res cycles
	apnea duration	1 resp cycle	missed res cycles		rats	apnea duration	missed res cycles		Column B	control			Column B	control
20200618A	0		0		20210304A	0	0		vs.	vs.			vs.	vs.
20200618B	0		0		20210304B	0	0		Column A	GtACR2+CRE			Column A	treated
20210114A	0		0		20210304C	0	0
20210114B	0		0		20210304D	0	0		Unpaired t test				Unpaired t test
20210318A	0		0		20210304E	0	0		P value	0.3893			P value	0.3893
20210318B	4.19	0.8303	5.04637						P value summary	ns			P value summary	ns
									Significantly different (P < 0.05)?	No			Significantly different (P < 0.05)?	No
									One- or two-tailed P value?	Two-tailed			One- or two-tailed P value?	Two-tailed
									t, df	t=0.9045, df=9			t, df	t=0.9045, df=9
									How big is the difference?				How big is the difference?
									Mean of column A	0.6983			Mean of column A	0.845
									Mean of column B	0			Mean of column B	0
average	0.698333		0.841061						Difference between means (B - A) ± SEM	-0.6983 ± 0.7720			Difference between means (B - A) ± SEM	-0.8450 ± 0.9342
SD	1.71056		2.06017						95% confidence interval	-2.445 to 1.048			95% confidence interval	-2.958 to 1.268
confidence 95%			2.172						R squared (eta squared)	0.08333			R squared (eta squared)	0.08333
bottom limit	-1.097		-1.327
upper limit	2.493		3.017
n	6		6

## Sheet: ETA-dEMG
DATA preBotC to 7n								DATA preBotC to 7n								DATA preBotC to 7n								DATA preBotC to 7n									dEMG peak					Statistics
dEMG-baseline								dEMG-laser on								ΔdEMG-baseline								ΔdEMG - laser ON										dia baseline	dia laser ON
Time	20200618A	20200618B	20210114A	Rat 20210114B	Rat 20210318A	Rat 20210318B		Time	20200618A	20200618B	20210114A	Rat 20210114B	Rat 20210318A	Rat 20210318B		Time	20200618A	20200618B	20210114A	Rat 20210114B	Rat 20210318A	Rat 20210318B		Time	20200618A	20200618B	20210114A	Rat 20210114B	Rat 20210318A	Rat 20210318B			rat 20200618A	0.0229215	0.0214382			Column B	laser ON
-0.2	0.00036456	0.00136509	0.00334507	0.0059421	0.00748058	0.00717944		-0.2	0.000395902	0.0054148	0.00336117	0.0082148	0.00781738	0.00721937		-0.2	-0.00253167	-0.00293763	-0.00405437	-0.0206422	-0.0135935	-0.00382456		-0.2	-0.00250601	0.00211429	-0.00164006	-0.0104065	-0.0132302	-0.00409248			rat 20200618B	0.0141609	0.0132828			vs.	vs.
-0.1998	0.00036483	0.00135902	0.0033482	0.00593711	0.00749155	0.00718036		-0.1998	0.00039625	0.00539901	0.00336212	0.00819189	0.007825	0.00722242		-0.1998	-0.0025314	-0.0029437	-0.00405124	-0.0206472	-0.0135826	-0.00382365		-0.1998	-0.00250566	0.00209851	-0.00163912	-0.0104294	-0.0132226	-0.00408943			Rat 20210114A	0.00917062	0.00847574			Column A	baseline
-0.1996	0.000365047	0.00135189	0.00335178	0.0059373	0.00750283	0.0071767		-0.1996	0.000396111	0.00538268	0.0033628	0.00818302	0.00783292	0.00722394		-0.1996	-0.00253118	-0.00295083	-0.00404766	-0.020647	-0.0135713	-0.00382731		-0.1996	-0.0025058	0.00208218	-0.00163844	-0.0104382	-0.0132147	-0.00408791			Rat 20210114B	0.0488425	0.039534
-0.1994	0.000365751	0.00134494	0.00335618	0.00593413	0.00751472	0.00717517		-0.1994	0.000395554	0.00536454	0.0033632	0.00816863	0.00784085	0.00722577		-0.1994	-0.00253048	-0.00295777	-0.00404326	-0.0206502	-0.0135594	-0.00382883		-0.1994	-0.00250636	0.00206403	-0.00163804	-0.0104526	-0.0132068	-0.00408608			Rat 20210318A	0.049396	0.0395374			Paired t test
-0.1992	0.000366238	0.00134102	0.00335897	0.00592651	0.00752691	0.00717182		-0.1992	0.000394927	0.00534469	0.00336312	0.00815973	0.00784938	0.0072276		-0.1992	-0.00252999	-0.0029617	-0.00404047	-0.0206578	-0.0135472	-0.00383218		-0.1992	-0.00250698	0.00204419	-0.00163811	-0.0104615	-0.0131982	-0.00408425			Rat 20210318B	0.0302384	0.0200549			P value	0.0404
-0.199	0.000366292	0.00133738	0.00336151	0.00591869	0.00754306	0.00716694		-0.199	0.00039437	0.00532124	0.00336341	0.00814702	0.0078573	0.00722912		-0.199	-0.00252993	-0.00296534	-0.00403793	-0.0206656	-0.0135311	-0.00383706		-0.199	-0.00250754	0.00202073	-0.00163782	-0.0104742	-0.0131903	-0.00408273								P value summary	*
-0.1988	0.000366346	0.00133261	0.00336298	0.00591211	0.0075647	0.00716451		-0.1988	0.000393883	0.00530308	0.00336509	0.00813474	0.00786371	0.00722973		-0.1988	-0.00252988	-0.00297011	-0.00403647	-0.0206722	-0.0135094	-0.0038395		-0.1988	-0.00250803	0.00200257	-0.00163615	-0.0104865	-0.0131839	-0.00408212			Mean	0.02912	0.0237205			Significantly different (P < 0.05)?	Yes
-0.1986	0.000366617	0.00132838	0.00336514	0.00590917	0.00759122	0.00716634		-0.1986	0.000393744	0.00528972	0.0033673	0.00813598	0.0078695	0.00723309		-0.1986	-0.00252961	-0.00297434	-0.0040343	-0.0206752	-0.0134829	-0.00383767		-0.1986	-0.00250817	0.00198921	-0.00163394	-0.0104853	-0.0131781	-0.00407876			Std. Deviation	0.0171	0.01312			One- or two-tailed P value?	Two-tailed
-0.1984	0.000366509	0.00132352	0.0033675	0.00590329	0.00761743	0.00716755		-0.1984	0.000393396	0.00527158	0.00336797	0.00813783	0.00787742	0.00723827		-0.1984	-0.00252972	-0.0029792	-0.00403194	-0.020681	-0.0134567	-0.00383645		-0.1984	-0.00250852	0.00197107	-0.00163327	-0.0104834	-0.0131702	-0.00407358			Std. Error of Mean	0.00698	0.005355			t, df	t=2.747, df=5
-0.1982	0.000366455	0.00131871	0.0033695	0.00589634	0.00764303	0.00717243		-0.1982	0.000393256	0.00524603	0.00336875	0.00813314	0.00788687	0.00724223		-0.1982	-0.00252977	-0.00298401	-0.00402994	-0.020688	-0.0134311	-0.00383158		-0.1982	-0.00250865	0.00194553	-0.00163248	-0.0104881	-0.0131607	-0.00406962								Number of pairs	6
-0.198	0.000366725	0.00131455	0.00337179	0.00589132	0.0076662	0.007177		-0.198	0.000392073	0.00521794	0.00337085	0.00812796	0.00789815	0.00724497		-0.198	-0.0025295	-0.00298816	-0.00402765	-0.020693	-0.0134079	-0.003827		-0.198	-0.00250984	0.00191743	-0.00163038	-0.0104933	-0.0131495	-0.00406688			Lower 95% CI of mean	0.01118	0.009955
-0.1978	0.000367104	0.0013116	0.00337461	0.00588454	0.00768418	0.00718401		-0.1978	0.000391029	0.00519284	0.00337259	0.0081252	0.00790912	0.00724893		-0.1978	-0.00252912	-0.00299112	-0.00402483	-0.0206998	-0.0133899	-0.00381999		-0.1978	-0.00251088	0.00189234	-0.00162864	-0.0104961	-0.0131385	-0.00406291			Upper 95% CI of mean	0.04706	0.03749			How big is the difference?
-0.1976	0.000367321	0.00130959	0.00337642	0.00588121	0.00770521	0.00718798		-0.1976	0.000390611	0.00517582	0.00337431	0.00811315	0.00792284	0.00725473		-0.1976	-0.0025289	-0.00299312	-0.00402302	-0.0207031	-0.0133689	-0.00381603		-0.1976	-0.0025113	0.00187532	-0.00162692	-0.0105081	-0.0131248	-0.00405712								Mean of differences (B - A)	-0.005401
-0.1974	0.000367321	0.00130766	0.00337834	0.00587915	0.0077232	0.00719011		-0.1974	0.000390472	0.00515439	0.003375	0.00809629	0.00793899	0.00726204		-0.1974	-0.0025289	-0.00299506	-0.0040211	-0.0207052	-0.0133509	-0.0038139		-0.1974	-0.00251144	0.00185388	-0.00162624	-0.010525	-0.0131086	-0.00404981			Minimum	0.009171	0.008476			SD of differences	0.004816
-0.1972	0.000367537	0.0013059	0.00337952	0.00587895	0.00773813	0.00718889		-0.1972	0.000390054	0.00512942	0.00337688	0.00807956	0.00795606	0.00727088		-0.1972	-0.00252869	-0.00299681	-0.00401992	-0.0207054	-0.013336	-0.00381512		-0.1972	-0.00251186	0.00182891	-0.00162436	-0.0105417	-0.0130915	-0.00404097			Maximum	0.0494	0.03954			SEM of differences	0.001966
-0.197	0.000367754	0.0013035	0.00338087	0.0058787	0.00775124	0.00718523		-0.197	0.000389567	0.00510841	0.00337971	0.00806758	0.00797557	0.00728063		-0.197	-0.00252847	-0.00299922	-0.00401857	-0.0207056	-0.0133229	-0.00381877		-0.197	-0.00251234	0.00180791	-0.00162152	-0.0105537	-0.013072	-0.00403122			Range	0.04023	0.03106			95% confidence interval	-0.01046 to -0.0003472
-0.1968	0.000367917	0.00129983	0.00338015	0.00587867	0.00776404	0.00717517		-0.1968	0.00038894	0.00509573	0.00338199	0.00807195	0.00799721	0.007291		-0.1968	-0.00252831	-0.00300289	-0.00401929	-0.0207057	-0.0133101	-0.00382883		-0.1968	-0.00251297	0.00179522	-0.00161925	-0.0105493	-0.0130504	-0.00402085								R squared (partial eta squared)	0.6015
-0.1966	0.000367971	0.00129699	0.00337991	0.00587747	0.00777806	0.00717609		-0.1966	0.000389288	0.00507927	0.00338267	0.00808386	0.00801946	0.00730014		-0.1966	-0.00252826	-0.00300572	-0.00401953	-0.0207068	-0.0132961	-0.00382792		-0.1966	-0.00251262	0.00177876	-0.00161856	-0.0105374	-0.0130281	-0.00401171
-0.1964	0.000367754	0.00129325	0.00338016	0.00587572	0.00778873	0.00717822		-0.1964	0.000389985	0.00505675	0.00338521	0.00809162	0.00804049	0.00730745		-0.1964	-0.00252847	-0.00300947	-0.00401929	-0.0207086	-0.0132854	-0.00382578		-0.1964	-0.00251193	0.00175624	-0.00161603	-0.0105296	-0.0130071	-0.00400439								Normality of Residuals
-0.1962	0.000367808	0.00128627	0.00337779	0.00587621	0.00779269	0.00718493		-0.1962	0.000389567	0.00502212	0.00338539	0.00809724	0.00806243	0.00731629		-0.1962	-0.00252842	-0.00301644	-0.00402165	-0.0207081	-0.0132814	-0.00381908		-0.1962	-0.00251234	0.00172161	-0.00161584	-0.010524	-0.0129852	-0.00399555								Test name	Statistics	P value	Passed normality test (alpha=0.05)?	P value summary
-0.196	0.000367592	0.00127896	0.00337669	0.00587462	0.00778873	0.00718798		-0.196	0.000389219	0.00499526	0.00338574	0.00809603	0.00808499	0.00732391		-0.196	-0.00252863	-0.00302376	-0.00402275	-0.0207097	-0.0132854	-0.00381603		-0.196	-0.00251269	0.00169476	-0.00161549	-0.0105252	-0.0129626	-0.00398794
-0.1958	0.000367483	0.00127232	0.00337555	0.00587319	0.00777714	0.00719194		-0.1958	0.000389288	0.00497742	0.00338631	0.0080945	0.00810785	0.00733367		-0.1958	-0.00252874	-0.00303039	-0.0040239	-0.0207111	-0.013297	-0.00381207		-0.1958	-0.00251262	0.00167691	-0.00161493	-0.0105268	-0.0129398	-0.00397818								Shapiro-Wilk (W)	0.7478	0.019	No	*
-0.1956	0.0003677	0.00126706	0.0033748	0.00587223	0.0077677	0.00719346		-0.1956	0.000389636	0.00497022	0.00338888	0.00809253	0.0081301	0.00734281		-0.1956	-0.00252853	-0.00303565	-0.00402464	-0.0207121	-0.0133064	-0.00381054		-0.1956	-0.00251227	0.00166972	-0.00161236	-0.0105287	-0.0129175	-0.00396904								Kolmogorov-Smirnov (distance)	0.292	0.1	Yes	ns
-0.1954	0.000367646	0.00126394	0.00337372	0.0058709	0.00775672	0.0071956		-0.1954	0.000390193	0.00495241	0.00339124	0.00809572	0.00815296	0.00735196		-0.1954	-0.00252858	-0.00303878	-0.00402573	-0.0207134	-0.0133174	-0.00380841		-0.1954	-0.00251172	0.0016519	-0.00161	-0.0105255	-0.0128946	-0.00395989
-0.1952	0.0003677	0.00126216	0.00337286	0.00586736	0.00774758	0.0071962		-0.1952	0.000391377	0.00492538	0.00339062	0.00810724	0.00817429	0.00735927		-0.1952	-0.00252853	-0.00304055	-0.00402659	-0.020717	-0.0133265	-0.0038078		-0.1952	-0.00251053	0.00162487	-0.00161062	-0.010514	-0.0128733	-0.00395258
-0.195	0.0003677	0.00125896	0.00337271	0.00586411	0.00773661	0.00719956		-0.195	0.000391098	0.00489651	0.00339225	0.00812525	0.00819319	0.00736049		-0.195	-0.00252853	-0.00304376	-0.00402673	-0.0207202	-0.0133375	-0.00380445		-0.195	-0.00251081	0.00159601	-0.00160898	-0.010496	-0.0128544	-0.00395136
-0.1948	0.0003677	0.00125435	0.00337244	0.00585714	0.00772533	0.00720535		-0.1948	0.000391098	0.00487255	0.0033933	0.00814001	0.00821209	0.00736049		-0.1948	-0.00252853	-0.00304837	-0.004027	-0.0207272	-0.0133488	-0.00379866		-0.1948	-0.00251081	0.00157204	-0.00160793	-0.0104812	-0.0128355	-0.00395136
-0.1946	0.000368025	0.00124499	0.00337343	0.0058533	0.00771832	0.00721205		-0.1946	0.000391446	0.00485989	0.00339538	0.00815286	0.00823098	0.00736018		-0.1946	-0.0025282	-0.00305772	-0.00402602	-0.020731	-0.0133558	-0.00379195		-0.1946	-0.00251046	0.00155938	-0.00160585	-0.0104684	-0.0128166	-0.00395166
-0.1944	0.0003677	0.00123209	0.00337325	0.00585067	0.00771436	0.00721693		-0.1944	0.000392351	0.00484313	0.00339692	0.00815571	0.00824836	0.00736171		-0.1944	-0.00252853	-0.00307062	-0.00402619	-0.0207336	-0.0133598	-0.00378707		-0.1944	-0.00250956	0.00154262	-0.00160431	-0.0104655	-0.0127992	-0.00395014
-0.1942	0.000367754	0.00122246	0.00337447	0.00585182	0.00771283	0.00721693		-0.1942	0.000392839	0.00482385	0.00340043	0.00815973	0.00826634	0.00736476		-0.1942	-0.00252847	-0.00308025	-0.00402497	-0.0207325	-0.0133613	-0.00378707		-0.1942	-0.00250907	0.00152335	-0.0016008	-0.0104615	-0.0127813	-0.00394709
-0.194	0.000367808	0.00121715	0.00337602	0.00585292	0.00771527	0.00721663		-0.194	0.000393813	0.00480011	0.00340392	0.0081647	0.00828188	0.00737085		-0.194	-0.00252842	-0.00308556	-0.00402342	-0.0207314	-0.0133589	-0.00378738		-0.194	-0.0025081	0.00149961	-0.00159732	-0.0104566	-0.0127657	-0.003941
-0.1938	0.000368133	0.00121216	0.00337821	0.00585407	0.00772198	0.00721998		-0.1938	0.000394927	0.00477739	0.00340858	0.00817534	0.00829651	0.00737878		-0.1938	-0.00252809	-0.00309055	-0.00402123	-0.0207302	-0.0133521	-0.00378403		-0.1938	-0.00250698	0.00147689	-0.00159265	-0.0104459	-0.0127511	-0.00393307
-0.1936	0.000368187	0.00120321	0.00338035	0.00585421	0.00773142	0.00722699		-0.1936	0.000395206	0.00475911	0.0034136	0.00818142	0.00831358	0.00738701		-0.1936	-0.00252804	-0.0030995	-0.00401909	-0.0207301	-0.0133427	-0.00377702		-0.1936	-0.00250671	0.0014586	-0.00158764	-0.0104398	-0.012734	-0.00392484
-0.1934	0.000368458	0.00119208	0.00338372	0.00585524	0.00774118	0.00723309		-0.1934	0.000395066	0.00474445	0.00341973	0.00818015	0.00833492	0.00739615		-0.1934	-0.00252777	-0.00311063	-0.00401572	-0.0207291	-0.0133329	-0.00377092		-0.1934	-0.00250684	0.00144395	-0.00158151	-0.0104411	-0.0127127	-0.0039157
-0.1932	0.000368783	0.00118016	0.0033871	0.00585723	0.00775367	0.0072343		-0.1932	0.000395623	0.00472467	0.00342691	0.00817651	0.00835808	0.00740438		-0.1932	-0.00252744	-0.00312256	-0.00401235	-0.0207271	-0.0133204	-0.0037697		-0.1932	-0.00250629	0.00142416	-0.00157433	-0.0104447	-0.0126895	-0.00390747
-0.193	0.000368512	0.00117094	0.00338919	0.00585995	0.00776678	0.00723278		-0.193	0.000396528	0.00470952	0.00343325	0.00817225	0.00838247	0.007412		-0.193	-0.00252771	-0.00313178	-0.00401026	-0.0207244	-0.0133073	-0.00377123		-0.193	-0.00250538	0.00140901	-0.00156798	-0.010449	-0.0126651	-0.00389985
-0.1928	0.000368837	0.00116215	0.00339281	0.0058628	0.00778019	0.00723156		-0.1928	0.00039632	0.00469124	0.0034383	0.00816692	0.00840197	0.00741596		-0.1928	-0.00252739	-0.00314056	-0.00400663	-0.0207215	-0.0132939	-0.00377244		-0.1928	-0.00250559	0.00139073	-0.00156293	-0.0104543	-0.0126456	-0.00389589
-0.1926	0.000368783	0.00115642	0.00339582	0.00586372	0.00779452	0.00723187		-0.1926	0.000395902	0.00467117	0.00344407	0.00815298	0.00841538	0.00741413		-0.1926	-0.00252744	-0.0031463	-0.00400362	-0.0207206	-0.0132796	-0.00377214		-0.1926	-0.00250601	0.00137067	-0.00155716	-0.0104683	-0.0126322	-0.00389772
-0.1924	0.000368458	0.00115063	0.00339853	0.00586348	0.00780701	0.00722333		-0.1924	0.00039618	0.00464649	0.00344937	0.00813745	0.00842758	0.00741718		-0.1924	-0.00252777	-0.00315209	-0.00400091	-0.0207208	-0.0132671	-0.00378067		-0.1924	-0.00250573	0.00134599	-0.00155186	-0.0104838	-0.01262	-0.00389467
-0.1922	0.000368675	0.00114364	0.00340138	0.00586177	0.00782103	0.00720504		-0.1922	0.000395971	0.00462043	0.00345466	0.00811533	0.00844007	0.00742419		-0.1922	-0.00252755	-0.00315907	-0.00399806	-0.0207225	-0.0132531	-0.00379896		-0.1922	-0.00250594	0.00131992	-0.00154657	-0.0105059	-0.0126075	-0.00388766
-0.192	0.000369054	0.00113643	0.00340307	0.00585979	0.00783323	0.00718828		-0.192	0.000395971	0.00459772	0.00345896	0.00809583	0.0084544	0.00743273		-0.192	-0.00252717	-0.00316629	-0.00399637	-0.0207245	-0.0132409	-0.00381573		-0.192	-0.00250594	0.00129722	-0.00154227	-0.0105254	-0.0125932	-0.00387912
-0.1918	0.000369541	0.00112926	0.00340402	0.00585733	0.0078445	0.007177		-0.1918	0.000395623	0.00457879	0.00346332	0.0080838	0.00846872	0.00744522		-0.1918	-0.00252668	-0.00317345	-0.00399543	-0.020727	-0.0132296	-0.003827		-0.1918	-0.00250629	0.00127828	-0.00153792	-0.0105375	-0.0125789	-0.00386663
-0.1916	0.000369649	0.00112289	0.00340361	0.00585405	0.00785456	0.00717456		-0.1916	0.000396041	0.00455924	0.00346957	0.00807582	0.00848457	0.00745619		-0.1916	-0.00252658	-0.00317983	-0.00399583	-0.0207303	-0.0132196	-0.00382944		-0.1916	-0.00250587	0.00125874	-0.00153167	-0.0105454	-0.012563	-0.00385565
-0.1914	0.000369378	0.00111949	0.00340284	0.00584947	0.00786401	0.00718127		-0.1914	0.000397016	0.00454095	0.00347178	0.0080654	0.00849829	0.00746381		-0.1914	-0.00252685	-0.00318323	-0.0039966	-0.0207349	-0.0132101	-0.00382274		-0.1914	-0.0025049	0.00124045	-0.00152945	-0.0105559	-0.0125493	-0.00384803
-0.1912	0.000369324	0.0011143	0.00340181	0.00584521	0.00787254	0.00718767		-0.1912	0.000397573	0.00452634	0.00347518	0.00804883	0.00851627	0.00746778		-0.1912	-0.0025269	-0.00318842	-0.00399763	-0.0207391	-0.0132016	-0.00381634		-0.1912	-0.00250434	0.00122584	-0.00152605	-0.0105724	-0.0125313	-0.00384407
-0.191	0.000369595	0.00110865	0.00340124	0.00584484	0.00787895	0.00719194		-0.191	0.000397712	0.00451256	0.00347689	0.00803813	0.00853151	0.0074693		-0.191	-0.00252663	-0.00319406	-0.0039982	-0.0207395	-0.0131952	-0.00381207		-0.191	-0.0025042	0.00121205	-0.00152434	-0.0105831	-0.0125161	-0.00384255
-0.1908	0.000369757	0.00110432	0.00340058	0.00584752	0.00788321	0.00719224		-0.1908	0.000397294	0.00449201	0.003477	0.00802049	0.00854279	0.00747204		-0.1908	-0.00252647	-0.0031984	-0.00399887	-0.0207368	-0.0131909	-0.00381176		-0.1908	-0.00250462	0.0011915	-0.00152424	-0.0106008	-0.0125048	-0.0038398
-0.1906	0.000370028	0.0010995	0.00340009	0.005852	0.00788778	0.00718859		-0.1906	0.000396807	0.0044667	0.00347736	0.00800029	0.00855407	0.00747418		-0.1906	-0.0025262	-0.00320321	-0.00399935	-0.0207323	-0.0131863	-0.00381542		-0.1906	-0.0025051	0.00116619	-0.00152388	-0.010621	-0.0124935	-0.00383767
-0.1904	0.000369595	0.0010987	0.0034009	0.00585802	0.00789053	0.0071834		-0.1904	0.000396807	0.0044414	0.00347832	0.00797667	0.00857357	0.00747814		-0.1904	-0.00252663	-0.00320401	-0.00399855	-0.0207263	-0.0131836	-0.0038206		-0.1904	-0.0025051	0.00114089	-0.00152292	-0.0106446	-0.012474	-0.00383371
-0.1902	0.000369649	0.00110064	0.00339947	0.00586516	0.00789236	0.00717883		-0.1902	0.000397016	0.00442776	0.00347866	0.00795949	0.00860283	0.00748241		-0.1902	-0.00252658	-0.00320207	-0.00399997	-0.0207192	-0.0131818	-0.00382517		-0.1902	-0.0025049	0.00112725	-0.00152257	-0.0106618	-0.0124448	-0.00382944
-0.19	0.000369757	0.00110164	0.00339895	0.0058728	0.00789418	0.00717487		-0.19	0.000397433	0.00441461	0.0034802	0.00794281	0.00862905	0.00748576		-0.19	-0.00252647	-0.00320108	-0.00400049	-0.0207115	-0.0131799	-0.00382914		-0.19	-0.00250448	0.0011141	-0.00152103	-0.0106784	-0.0124186	-0.00382609
-0.1898	0.000370028	0.00110076	0.00339734	0.00587881	0.00789479	0.00717365		-0.1898	0.00039799	0.00439003	0.00348185	0.00791654	0.00865434	0.00748728		-0.1898	-0.0025262	-0.00320195	-0.0040021	-0.0207055	-0.0131793	-0.00383036		-0.1898	-0.00250392	0.00108952	-0.00151939	-0.0107047	-0.0123933	-0.00382457
-0.1896	0.000370136	0.00109967	0.00339704	0.00588653	0.00789449	0.00717517		-0.1896	0.000397921	0.00435989	0.0034804	0.00788567	0.00868177	0.0074882		-0.1896	-0.00252609	-0.00320305	-0.0040024	-0.0206978	-0.0131796	-0.00382883		-0.1896	-0.00250399	0.00105939	-0.00152083	-0.0107356	-0.0123658	-0.00382365
-0.1894	0.00037057	0.00109703	0.00339598	0.00589607	0.00789449	0.00717914		-0.1894	0.000397433	0.00433339	0.00348095	0.0078642	0.00871256	0.00749003		-0.1894	-0.00252566	-0.00320568	-0.00400346	-0.0206882	-0.0131796	-0.00382487		-0.1894	-0.00250448	0.00103288	-0.00152029	-0.0107571	-0.012335	-0.00382182
-0.1892	0.00037057	0.0010919	0.00339491	0.0059031	0.00789266	0.00718401		-0.1892	0.000397085	0.00431238	0.00348249	0.00784559	0.00874609	0.00749003		-0.1892	-0.00252566	-0.00321081	-0.00400454	-0.0206812	-0.0131815	-0.00381999		-0.1892	-0.00250483	0.00101187	-0.00151875	-0.0107757	-0.0123015	-0.00382182
-0.189	0.000370786	0.00108838	0.00339426	0.00591069	0.00789297	0.00718401		-0.189	0.000396459	0.00429719	0.00348569	0.00782851	0.00877565	0.00749033		-0.189	-0.00252544	-0.00321434	-0.00400519	-0.0206736	-0.0131812	-0.00381999		-0.189	-0.00250545	0.000996684	-0.00151554	-0.0107927	-0.012272	-0.00382152
-0.1888	0.000371328	0.00108766	0.00339433	0.0059177	0.00789479	0.00718279		-0.1888	0.000396598	0.00428885	0.00348915	0.00782213	0.00880003	0.00749216		-0.1888	-0.0025249	-0.00321505	-0.00400512	-0.0206666	-0.0131793	-0.00382121		-0.1888	-0.00250531	0.000988341	-0.00151208	-0.0107991	-0.0122476	-0.00381969
-0.1886	0.000371544	0.00108703	0.00339442	0.00592115	0.00789723	0.00718157		-0.1886	0.000397225	0.00428278	0.00349366	0.00781474	0.00882229	0.00749247		-0.1886	-0.00252468	-0.00321569	-0.00400502	-0.0206632	-0.0131769	-0.00382243		-0.1886	-0.00250469	0.000982278	-0.00150758	-0.0108065	-0.0122253	-0.00381938
-0.1884	0.000371111	0.00108349	0.00339415	0.00592055	0.00789845	0.00718036		-0.1884	0.000397503	0.00427804	0.00349638	0.00781238	0.00884301	0.00749186		-0.1884	-0.00252511	-0.00321923	-0.00400529	-0.0206638	-0.0131757	-0.00382365		-0.1884	-0.00250441	0.000977531	-0.00150485	-0.0108089	-0.0122046	-0.00381999
-0.1882	0.00037084	0.00107598	0.00339351	0.00592472	0.00790272	0.00717914		-0.1882	0.000397433	0.00426353	0.00349943	0.00779684	0.00886008	0.00749033		-0.1882	-0.00252539	-0.00322674	-0.00400593	-0.0206596	-0.0131714	-0.00382487		-0.1882	-0.00250448	0.000963025	-0.0015018	-0.0108244	-0.0121875	-0.00382152
-0.188	0.000370732	0.00106792	0.00339192	0.00593207	0.00790851	0.00718066		-0.188	0.000397225	0.00424472	0.00350359	0.0077524	0.00887806	0.00748667		-0.188	-0.00252549	-0.00323479	-0.00400752	-0.0206522	-0.0131656	-0.00382335		-0.188	-0.00250469	0.000944214	-0.00149764	-0.0108689	-0.0121695	-0.00382517
-0.1878	0.000370786	0.00106194	0.00339037	0.00593997	0.00791369	0.00718218		-0.1878	0.000397016	0.00422932	0.00350775	0.00770716	0.00889361	0.00748546		-0.1878	-0.00252544	-0.00324078	-0.00400907	-0.0206443	-0.0131604	-0.00382182		-0.1878	-0.0025049	0.000928811	-0.00149348	-0.0109141	-0.012154	-0.00382639
-0.1876	0.00037084	0.00105824	0.00338839	0.00594657	0.0079207	0.00718097		-0.1876	0.000397155	0.00421953	0.00351134	0.00767458	0.00890793	0.00748363		-0.1876	-0.00252539	-0.00324447	-0.00401105	-0.0206377	-0.0131534	-0.00382304		-0.1876	-0.00250476	0.000919024	-0.0014899	-0.0109467	-0.0121397	-0.00382822
-0.1874	0.000370624	0.00105473	0.00338663	0.00595191	0.00792924	0.00717761		-0.1874	0.000397712	0.00420224	0.00351796	0.00765311	0.00891982	0.00748332		-0.1874	-0.0025256	-0.00324799	-0.00401281	-0.0206324	-0.0131449	-0.00382639		-0.1874	-0.0025042	0.00090173	-0.00148327	-0.0109681	-0.0121278	-0.00382853
-0.1872	0.000370624	0.00105173	0.00338657	0.00595331	0.00793808	0.00717213		-0.1872	0.000397642	0.00417559	0.0035235	0.00763706	0.00893293	0.00748332		-0.1872	-0.0025256	-0.00325099	-0.00401287	-0.020631	-0.013136	-0.00383188		-0.1872	-0.00250427	0.000875083	-0.00147773	-0.0109842	-0.0121147	-0.00382853
-0.187	0.000371274	0.00104696	0.00338642	0.00595462	0.00794539	0.00716725		-0.187	0.000397573	0.00415182	0.0035297	0.00761985	0.00895121	0.00748637		-0.187	-0.00252495	-0.00325575	-0.00401303	-0.0206297	-0.0131287	-0.00383676		-0.187	-0.00250434	0.000851311	-0.00147154	-0.0110014	-0.0120964	-0.00382548
-0.1868	0.000371923	0.00104089	0.00338649	0.00595253	0.00795088	0.00716877		-0.1868	0.000397503	0.00414465	0.00353783	0.00760844	0.00897163	0.00748728		-0.1868	-0.0025243	-0.00326182	-0.00401295	-0.0206318	-0.0131232	-0.00383523		-0.1868	-0.00250441	0.000844145	-0.0014634	-0.0110128	-0.012076	-0.00382457
-0.1866	0.000372681	0.00103655	0.00338512	0.00595307	0.00795514	0.00716603		-0.1866	0.000397433	0.00413799	0.0035448	0.00759436	0.00899602	0.00748728		-0.1866	-0.00252354	-0.00326616	-0.00401432	-0.0206313	-0.013119	-0.00383798		-0.1866	-0.00250448	0.000837479	-0.00145644	-0.0110269	-0.0120516	-0.00382457
-0.1864	0.000372952	0.00103288	0.00338341	0.00595951	0.00796033	0.00716115		-0.1864	0.000397294	0.00412275	0.00355069	0.00757427	0.00901644	0.00747905		-0.1864	-0.00252327	-0.00326984	-0.00401603	-0.0206248	-0.0131138	-0.00384285		-0.1864	-0.00250462	0.000822247	-0.00145054	-0.011047	-0.0120312	-0.00383279
-0.1862	0.000373114	0.00102938	0.00338297	0.00597088	0.00796368	0.00715689		-0.1862	0.000397085	0.00410588	0.00355655	0.00755193	0.00902985	0.00747052		-0.1862	-0.00252311	-0.00327334	-0.00401648	-0.0206134	-0.0131104	-0.00384712		-0.1862	-0.00250483	0.000805372	-0.00144469	-0.0110693	-0.0120178	-0.00384133
-0.186	0.000373223	0.0010262	0.00338227	0.00598624	0.00796429	0.00715445		-0.186	0.000397294	0.00408853	0.00356144	0.00752315	0.00904143	0.00746686		-0.186	-0.002523	-0.00327651	-0.00401718	-0.0205981	-0.0131098	-0.00384956		-0.186	-0.00250462	0.000788021	-0.0014398	-0.0110981	-0.0120062	-0.00384499
-0.1858	0.000373277	0.001023	0.00338218	0.00599332	0.00796764	0.0071511		-0.1858	0.00039806	0.00407442	0.00356289	0.00749	0.00905698	0.00746412		-0.1858	-0.00252295	-0.00327971	-0.00401726	-0.020591	-0.0131065	-0.00385291		-0.1858	-0.00250385	0.00077391	-0.00143834	-0.0111313	-0.0119906	-0.00384773
-0.1856	0.000373927	0.00101935	0.00338181	0.00599156	0.00797069	0.0071453		-0.1856	0.00039806	0.00406482	0.00356445	0.0074591	0.00907039	0.00746016		-0.1856	-0.0025223	-0.00328336	-0.00401763	-0.0205928	-0.0131034	-0.0038587		-0.1856	-0.00250385	0.000764308	-0.00143678	-0.0111622	-0.0119772	-0.00385169
-0.1854	0.000375064	0.00101461	0.00338189	0.00598173	0.00797191	0.00713829		-0.1854	0.000398408	0.00405869	0.00356507	0.00742813	0.00908502	0.00745376		-0.1854	-0.00252116	-0.00328811	-0.00401755	-0.0206026	-0.0131022	-0.00386571		-0.1854	-0.0025035	0.000758186	-0.00143616	-0.0111931	-0.0119626	-0.00385809
-0.1852	0.000375768	0.00100859	0.00338218	0.00597244	0.00797404	0.00712793		-0.1852	0.000398478	0.00404782	0.0035686	0.00739714	0.00909904	0.00744949		-0.1852	-0.00252046	-0.00329412	-0.00401726	-0.0206119	-0.0131001	-0.00387608		-0.1852	-0.00250343	0.000747313	-0.00143264	-0.0112241	-0.0119486	-0.00386236
-0.185	0.000376201	0.00100427	0.0033807	0.00596038	0.00797404	0.00711696		-0.185	0.000398756	0.00403798	0.0035681	0.00737023	0.00911336	0.00744797		-0.185	-0.00252003	-0.00329844	-0.00401874	-0.0206239	-0.0131001	-0.00388705		-0.185	-0.00250315	0.000737469	-0.00143313	-0.011251	-0.0119342	-0.00386388
-0.1848	0.000376255	0.00100132	0.00338065	0.00594871	0.00797526	0.00710781		-0.1848	0.000398826	0.00402658	0.00356496	0.0073453	0.00912708	0.00744705		-0.1848	-0.00251997	-0.0033014	-0.00401879	-0.0206356	-0.0130989	-0.00389619		-0.1848	-0.00250309	0.000726073	-0.00143627	-0.011276	-0.0119205	-0.0038648
-0.1846	0.000376742	0.000998242	0.00338131	0.00593851	0.00797465	0.00710294		-0.1846	0.000398895	0.00401442	0.0035646	0.00731841	0.00914262	0.00744766		-0.1846	-0.00251948	-0.00330447	-0.00401814	-0.0206458	-0.0130995	-0.00390107		-0.1846	-0.00250302	0.00071391	-0.00143663	-0.0113028	-0.011905	-0.00386419
-0.1844	0.000377229	0.000995857	0.00338149	0.00593045	0.00797374	0.00709288		-0.1844	0.000398965	0.00400205	0.00356228	0.00729102	0.0091603	0.00744979		-0.1844	-0.002519	-0.00330686	-0.00401795	-0.0206539	-0.0131004	-0.00391113		-0.1844	-0.00250295	0.000701543	-0.00143896	-0.0113302	-0.0118873	-0.00386205
-0.1842	0.000377609	0.000994784	0.00338084	0.00592347	0.00797282	0.0070813		-0.1842	0.000399452	0.00398707	0.00356007	0.0072686	0.00917859	0.0074501		-0.1842	-0.00251862	-0.00330793	-0.0040186	-0.0206608	-0.0131013	-0.00392271		-0.1842	-0.00250246	0.00068656	-0.00144116	-0.0113527	-0.011869	-0.00386175
-0.184	0.000377554	0.000993737	0.00338024	0.00592061	0.00796977	0.0070688		-0.184	0.00039987	0.00396483	0.00355973	0.00725692	0.00919901	0.00745162		-0.184	-0.00251867	-0.00330898	-0.0040192	-0.0206637	-0.0131043	-0.00393521		-0.184	-0.00250204	0.000664324	-0.00144151	-0.0113643	-0.0118486	-0.00386023
-0.1838	0.000377717	0.000992441	0.00337867	0.00591595	0.00796459	0.00706331		-0.1838	0.0003998	0.00394106	0.00356076	0.00724645	0.00921821	0.00745376		-0.1838	-0.00251851	-0.00331027	-0.00402078	-0.0206684	-0.0131095	-0.00394069		-0.1838	-0.00250211	0.000640552	-0.00144048	-0.0113748	-0.0118294	-0.00385809
-0.1836	0.0003775	0.000990878	0.00337647	0.0059143	0.00796033	0.00705935		-0.1836	0.000399661	0.00392531	0.00356213	0.00722945	0.00923681	0.0074565		-0.1836	-0.00251873	-0.00331184	-0.00402297	-0.02067	-0.0131138	-0.00394465		-0.1836	-0.00250225	0.000624801	-0.00143911	-0.0113918	-0.0118108	-0.00385535
-0.1834	0.000377554	0.000989423	0.00337321	0.00591288	0.00795545	0.0070563		-0.1834	0.000400009	0.00391596	0.00356416	0.00721167	0.00925509	0.00745985		-0.1834	-0.00251867	-0.00331329	-0.00402623	-0.0206714	-0.0131187	-0.0039477		-0.1834	-0.0025019	0.000615455	-0.00143708	-0.0114096	-0.0117925	-0.003852
-0.1832	0.000377446	0.00098675	0.00336963	0.00591356	0.00794935	0.00705539		-0.1832	0.000400845	0.0039048	0.00356722	0.0071931	0.00927094	0.00746046		-0.1832	-0.00251878	-0.00331597	-0.00402981	-0.0206708	-0.0131248	-0.00394862		-0.1832	-0.00250107	0.000604292	-0.00143402	-0.0114282	-0.0117767	-0.00385139
-0.183	0.000377392	0.00098367	0.00336676	0.00591488	0.00794326	0.00705021		-0.183	0.000400775	0.00389104	0.00356878	0.00717645	0.0092874	0.00746199		-0.183	-0.00251883	-0.00331905	-0.00403268	-0.0206694	-0.0131309	-0.0039538		-0.183	-0.00250114	0.000590538	-0.00143246	-0.0114448	-0.0117602	-0.00384986
-0.1828	0.000377284	0.000981899	0.00336291	0.00591858	0.00793838	0.0070435		-0.1828	0.000400984	0.00387389	0.00357118	0.00716224	0.00930142	0.00746168		-0.1828	-0.00251894	-0.00332082	-0.00403653	-0.0206657	-0.0131357	-0.0039605		-0.1828	-0.00250093	0.000573387	-0.00143005	-0.011459	-0.0117462	-0.00385017
-0.1826	0.0003775	0.00098153	0.00335909	0.00592305	0.00793594	0.00703619		-0.1826	0.000400984	0.00385436	0.00357261	0.00715021	0.00931483	0.00746321		-0.1826	-0.00251873	-0.00332119	-0.00404035	-0.0206613	-0.0131382	-0.00396782		-0.1826	-0.00250093	0.000553851	-0.00142862	-0.011471	-0.0117328	-0.00384864
-0.1824	0.000377717	0.000981755	0.00335594	0.00592704	0.00793442	0.00703162		-0.1824	0.000400705	0.00383554	0.0035764	0.00714017	0.00932611	0.00746625		-0.1824	-0.00251851	-0.00332096	-0.00404351	-0.0206573	-0.0131397	-0.00397239		-0.1824	-0.00250121	0.000535037	-0.00142483	-0.0114811	-0.0117215	-0.0038456
-0.1822	0.000377392	0.000981503	0.00335431	0.00593249	0.00793411	0.00702613		-0.1822	0.000400288	0.00381936	0.0035792	0.00712748	0.00933739	0.007469		-0.1822	-0.00251883	-0.00332121	-0.00404513	-0.0206518	-0.01314	-0.00397788		-0.1822	-0.00250162	0.000518854	-0.00142203	-0.0114938	-0.0117102	-0.00384285
-0.182	0.000377338	0.000981912	0.00335169	0.00593643	0.00793442	0.00702125		-0.182	0.000400357	0.00380695	0.00358162	0.0071233	0.00934836	0.00746961		-0.182	-0.00251889	-0.0033208	-0.00404775	-0.0206479	-0.0131397	-0.00398275		-0.182	-0.00250155	0.000506439	-0.00141961	-0.011498	-0.0116992	-0.00384224
-0.1818	0.000377067	0.000982028	0.00334982	0.00594248	0.00793929	0.00701881		-0.1818	0.000400357	0.00379456	0.00358212	0.00711411	0.00935781	0.00747235		-0.1818	-0.00251916	-0.00332069	-0.00404962	-0.0206418	-0.0131348	-0.00398519		-0.1818	-0.00250155	0.000494055	-0.00141911	-0.0115071	-0.0116898	-0.0038395
-0.1816	0.000376905	0.000980978	0.00334883	0.0059473	0.00794448	0.0070179		-0.1816	0.000400357	0.00378063	0.00358222	0.0071084	0.00936756	0.00747265		-0.1816	-0.00251932	-0.00332174	-0.00405061	-0.020637	-0.0131296	-0.00398611		-0.1816	-0.00250155	0.000480121	-0.00141901	-0.0115129	-0.01168	-0.0038392
-0.1814	0.000377284	0.000980217	0.00334765	0.00595088	0.00795179	0.0070179		-0.1814	0.000400427	0.00376991	0.00358228	0.00711125	0.00937732	0.00747357		-0.1814	-0.00251894	-0.0033225	-0.00405179	-0.0206334	-0.0131223	-0.00398611		-0.1814	-0.00250148	0.000469407	-0.00141895	-0.01151	-0.0116703	-0.00383828
-0.1812	0.000377175	0.000979938	0.00334713	0.00595403	0.00796124	0.00701881		-0.1812	0.000400775	0.00376361	0.00358535	0.00710453	0.00938433	0.00747418		-0.1812	-0.00251905	-0.00332278	-0.00405231	-0.0206303	-0.0131129	-0.00398519		-0.1812	-0.00250114	0.000463102	-0.00141589	-0.0115167	-0.0116633	-0.00383767
-0.181	0.000377175	0.00097814	0.00334705	0.00595826	0.0079716	0.00701881		-0.181	0.000400775	0.00375262	0.0035858	0.0070934	0.00939073	0.00747235		-0.181	-0.00251905	-0.00332458	-0.00405239	-0.0206261	-0.0131025	-0.00398519		-0.181	-0.00250114	0.00045211	-0.00141543	-0.0115279	-0.0116569	-0.0038395
-0.1808	0.000377121	0.000975783	0.00334776	0.00596066	0.00798136	0.00701699		-0.1808	0.00040168	0.00373843	0.00358572	0.00708007	0.00939743	0.00747204		-0.1808	-0.0025191	-0.00332693	-0.00405168	-0.0206237	-0.0130928	-0.00398702		-0.1808	-0.00250023	0.000437925	-0.00141552	-0.0115412	-0.0116502	-0.0038398
-0.1806	0.000376796	0.000974728	0.00334815	0.00596316	0.00799172	0.00701546		-0.1806	0.000402237	0.00372595	0.00358534	0.00706616	0.00940231	0.00747265		-0.1806	-0.00251943	-0.00332799	-0.00405129	-0.0206212	-0.0130824	-0.00398854		-0.1806	-0.00249967	0.000425445	-0.0014159	-0.0115551	-0.0116453	-0.0038392
-0.1804	0.000377229	0.000973897	0.00334791	0.00596667	0.00800208	0.00701455		-0.1804	0.000402585	0.0037128	0.00358346	0.00705067	0.00940627	0.00747326		-0.1804	-0.002519	-0.00332882	-0.00405154	-0.0206177	-0.013072	-0.00398946		-0.1804	-0.00249933	0.000412292	-0.00141777	-0.0115706	-0.0116413	-0.00383859
-0.1802	0.000377338	0.000973082	0.00334748	0.00597105	0.00801184	0.00701211		-0.1802	0.000403003	0.00369476	0.00358344	0.00703666	0.00940932	0.00747326		-0.1802	-0.00251889	-0.00332963	-0.00405196	-0.0206133	-0.0130623	-0.0039919		-0.1802	-0.00249891	0.000394249	-0.0014178	-0.0115846	-0.0116383	-0.00383859
-0.18	0.0003775	0.000971804	0.00334624	0.00597343	0.00802159	0.00701119		-0.18	0.000403142	0.0036795	0.00358363	0.0070229	0.00941267	0.00747235		-0.18	-0.00251873	-0.00333091	-0.0040532	-0.0206109	-0.0130525	-0.00399281		-0.18	-0.00249877	0.000378995	-0.0014176	-0.0115984	-0.0116349	-0.0038395
-0.1798	0.000377392	0.000970684	0.00334397	0.00597817	0.00803043	0.00701119		-0.1798	0.00040356	0.0036643	0.00358147	0.00701044	0.00941389	0.00747265		-0.1798	-0.00251883	-0.00333203	-0.00405547	-0.0206061	-0.0130437	-0.00399281		-0.1798	-0.00249835	0.000363791	-0.00141976	-0.0116108	-0.0116337	-0.0038392
-0.1796	0.000377446	0.000969221	0.00334224	0.00598271	0.00803683	0.00700754		-0.1796	0.000403351	0.00364784	0.00357776	0.00699883	0.0094142	0.00747326		-0.1796	-0.00251878	-0.00333349	-0.00405721	-0.0206016	-0.0130373	-0.00399647		-0.1796	-0.00249856	0.000347334	-0.00142348	-0.0116224	-0.0116334	-0.00383859
-0.1794	0.0003775	0.000966556	0.00333923	0.00598757	0.0080414	0.00700205		-0.1794	0.00040349	0.00363085	0.00357551	0.00698917	0.0094145	0.00747357		-0.1794	-0.00251873	-0.00333616	-0.00406021	-0.0205967	-0.0130327	-0.00400196		-0.1794	-0.00249842	0.000330348	-0.00142573	-0.0116321	-0.0116331	-0.00383828
-0.1792	0.000377392	0.000963912	0.00333603	0.00599141	0.00804536	0.00699656		-0.1792	0.00040356	0.00362056	0.0035738	0.00698478	0.00941663	0.00747235		-0.1792	-0.00251883	-0.0033388	-0.00406341	-0.0205929	-0.0130288	-0.00400744		-0.1792	-0.00249835	0.000320055	-0.00142744	-0.0116365	-0.011631	-0.0038395
-0.179	0.000377717	0.000960847	0.00333252	0.00599492	0.00804689	0.00699504		-0.179	0.000403351	0.00360672	0.00357096	0.0069822	0.00941785	0.00747143		-0.179	-0.00251851	-0.00334187	-0.00406692	-0.0205894	-0.0130272	-0.00400897		-0.179	-0.00249856	0.000306214	-0.00143027	-0.0116391	-0.0116297	-0.00384041
-0.1788	0.000378042	0.000957855	0.0033304	0.00599697	0.00804872	0.00699413		-0.1788	0.000403351	0.00359038	0.00356811	0.00698126	0.00941938	0.00747296		-0.1788	-0.00251818	-0.00334486	-0.00406904	-0.0205873	-0.0130254	-0.00400988		-0.1788	-0.00249856	0.000289877	-0.00143313	-0.01164	-0.0116282	-0.00383889
-0.1786	0.000378529	0.000954849	0.00332733	0.00600021	0.00804811	0.0069923		-0.1786	0.000403142	0.00357321	0.00356576	0.00697696	0.00941877	0.00747326		-0.1786	-0.0025177	-0.00334787	-0.00407211	-0.0205841	-0.013026	-0.00401171		-0.1786	-0.00249877	0.000272705	-0.00143548	-0.0116443	-0.0116288	-0.00383859
-0.1784	0.000378529	0.000953069	0.00332459	0.00600106	0.00804353	0.00699016		-0.1784	0.000403142	0.00356106	0.0035635	0.00697096	0.00941724	0.00747448		-0.1784	-0.0025177	-0.00334965	-0.00407485	-0.0205833	-0.0130306	-0.00401384		-0.1784	-0.00249877	0.000260554	-0.00143774	-0.0116503	-0.0116304	-0.00383737
-0.1782	0.000378475	0.000951946	0.00332155	0.00599753	0.00803805	0.0069862		-0.1782	0.000403142	0.0035449	0.00356221	0.00696578	0.00941785	0.00747662		-0.1782	-0.00251775	-0.00335077	-0.00407789	-0.0205868	-0.0130361	-0.0040178		-0.1782	-0.00249877	0.00024439	-0.00143903	-0.0116555	-0.0116297	-0.00383523
-0.178	0.000378637	0.000949478	0.0033186	0.00598982	0.00803073	0.00698163		-0.178	0.000403003	0.00352928	0.00356066	0.00696324	0.00941603	0.00747905		-0.178	-0.00251759	-0.00335324	-0.00408085	-0.0205945	-0.0130434	-0.00402238		-0.178	-0.00249891	0.000228777	-0.00144057	-0.011658	-0.0116316	-0.00383279
-0.1778	0.000378962	0.000946789	0.00331521	0.00598752	0.00802464	0.00697523		-0.1778	0.000403699	0.00351823	0.0035588	0.00695673	0.0094145	0.0074821		-0.1778	-0.00251726	-0.00335593	-0.00408423	-0.0205968	-0.0130495	-0.00402878		-0.1778	-0.00249821	0.000217719	-0.00144244	-0.0116645	-0.0116331	-0.00382975
-0.1776	0.000378583	0.000943599	0.00331146	0.00598947	0.0080222	0.00696883		-0.1776	0.000404604	0.00351131	0.0035575	0.00695304	0.00941145	0.00748424		-0.1776	-0.00251764	-0.00335912	-0.00408799	-0.0205948	-0.0130519	-0.00403518		-0.1776	-0.00249731	0.000210799	-0.00144374	-0.0116682	-0.0116362	-0.00382761
-0.1774	0.00037815	0.00093902	0.00330917	0.00599198	0.00802159	0.00696426		-0.1774	0.000405648	0.0035058	0.00355607	0.006946	0.00940871	0.00748576		-0.1774	-0.00251808	-0.0033637	-0.00409027	-0.0205923	-0.0130525	-0.00403975		-0.1774	-0.00249626	0.000205291	-0.00144517	-0.0116753	-0.0116389	-0.00382609
-0.1772	0.000378042	0.000933621	0.00330676	0.0059957	0.00801641	0.00695999		-0.1772	0.000406135	0.00348914	0.00355437	0.00694152	0.00940475	0.0074885		-0.1772	-0.00251818	-0.00336909	-0.00409268	-0.0205886	-0.0130577	-0.00404402		-0.1772	-0.00249578	0.000188638	-0.00144686	-0.0116797	-0.0116429	-0.00382335
-0.177	0.000377717	0.000928028	0.00330396	0.00600081	0.00800757	0.00695603		-0.177	0.000406275	0.00346701	0.00355305	0.00693754	0.00939835	0.00749186		-0.177	-0.00251851	-0.00337469	-0.00409548	-0.0205835	-0.0130666	-0.00404798		-0.177	-0.00249564	0.000166507	-0.00144819	-0.0116837	-0.0116493	-0.00381999
-0.1768	0.000376905	0.000923455	0.00330138	0.00600469	0.00799477	0.00695267		-0.1768	0.000406553	0.00344368	0.0035537	0.00693757	0.00939073	0.0074949		-0.1768	-0.00251932	-0.00337926	-0.00409807	-0.0205796	-0.0130794	-0.00405133		-0.1768	-0.00249536	0.000143175	-0.00144754	-0.0116837	-0.0116569	-0.00381695
-0.1766	0.00037685	0.000920979	0.00329997	0.0060095	0.00798288	0.00695054		-0.1766	0.000406692	0.00342727	0.00355292	0.00693737	0.00938585	0.00749734		-0.1766	-0.00251938	-0.00338174	-0.00409947	-0.0205748	-0.0130912	-0.00405347		-0.1766	-0.00249522	0.000126764	-0.00144832	-0.0116839	-0.0116618	-0.00381451
-0.1764	0.00037685	0.000919634	0.00329741	0.00601262	0.00797099	0.00694749		-0.1764	0.000407388	0.00341774	0.00355293	0.0069355	0.00937823	0.00750039		-0.1764	-0.00251938	-0.00338308	-0.00410203	-0.0205717	-0.0131031	-0.00405651		-0.1764	-0.00249452	0.000117237	-0.0014483	-0.0116858	-0.0116694	-0.00381146
-0.1762	0.000376959	0.000919345	0.00329555	0.00601526	0.00795941	0.00694444		-0.1762	0.000408433	0.00340472	0.0035531	0.00693275	0.00937061	0.00750222		-0.1762	-0.00251927	-0.00338337	-0.00410389	-0.0205691	-0.0131147	-0.00405956		-0.1762	-0.00249348	0.00010421	-0.00144814	-0.0116885	-0.011677	-0.00380963
-0.176	0.000376905	0.000918319	0.00329577	0.00601878	0.00794722	0.00694231		-0.176	0.000409616	0.00338652	0.0035535	0.0069285	0.00936543	0.00750313		-0.176	-0.00251932	-0.0033844	-0.00410367	-0.0205655	-0.0131269	-0.0040617		-0.176	-0.00249229	8.60102e-05	-0.00144774	-0.0116928	-0.0116822	-0.00380872
-0.1758	0.000376526	0.000916543	0.00329615	0.0060254	0.00793015	0.00694262		-0.1758	0.000410382	0.0033681	0.00355479	0.006922	0.00935903	0.00750496		-0.1758	-0.0025197	-0.00338617	-0.00410329	-0.0205589	-0.013144	-0.00406139		-0.1758	-0.00249153	6.75966e-05	-0.00144645	-0.0116993	-0.0116886	-0.00380689
-0.1756	0.000375713	0.000914257	0.00329595	0.00603382	0.007914	0.00694323		-0.1756	0.00041073	0.00335496	0.00355486	0.00691064	0.00935202	0.0075071		-0.1756	-0.00252051	-0.00338846	-0.0041035	-0.0205505	-0.0131601	-0.00406078		-0.1756	-0.00249118	5.44526e-05	-0.00144638	-0.0117106	-0.0116956	-0.00380475
-0.1754	0.00037528	0.000911179	0.00329578	0.00603632	0.00790059	0.0069414		-0.1754	0.000411148	0.00334115	0.00355421	0.00690161	0.00934348	0.00750649		-0.1754	-0.00252095	-0.00339154	-0.00410366	-0.020548	-0.0131735	-0.00406261		-0.1754	-0.00249076	4.06483e-05	-0.00144703	-0.0117196	-0.0117041	-0.00380536
-0.1752	0.000375064	0.000908095	0.00329567	0.00603584	0.00789388	0.00693987		-0.1752	0.000411356	0.00332568	0.0035551	0.00689517	0.00933617	0.00750588		-0.1752	-0.00252116	-0.00339462	-0.00410377	-0.0205485	-0.0131802	-0.00406413		-0.1752	-0.00249055	2.51705e-05	-0.00144614	-0.0117261	-0.0117114	-0.00380597
-0.175	0.000375334	0.000905562	0.00329505	0.00603258	0.00789388	0.00693835		-0.175	0.000411913	0.00331373	0.00355347	0.00689344	0.00932824	0.00750435		-0.175	-0.00252089	-0.00339715	-0.0041044	-0.0205517	-0.0131802	-0.00406566		-0.175	-0.00249	1.32242e-05	-0.00144777	-0.0117278	-0.0117194	-0.0038075
-0.1748	0.000375605	0.000903385	0.00329499	0.00602559	0.00789906	0.00693621		-0.1748	0.000412261	0.00330661	0.00355467	0.00688781	0.00932062	0.00750344		-0.1748	-0.00252062	-0.00339933	-0.00410445	-0.0205587	-0.0131751	-0.00406779		-0.1748	-0.00248965	6.1074e-06	-0.00144657	-0.0117334	-0.011727	-0.00380841
-0.1746	0.000375172	0.000901329	0.00329397	0.00601813	0.00790699	0.00693286		-0.1746	0.000413166	0.00329693	0.00355464	0.00687742	0.00931361	0.00750466		-0.1746	-0.00252105	-0.00340139	-0.00410547	-0.0205662	-0.0131671	-0.00407114		-0.1746	-0.00248874	-3.5812e-06	-0.00144659	-0.0117438	-0.011734	-0.00380719
-0.1744	0.000374251	0.000899461	0.00329382	0.00600873	0.0079143	0.00693164		-0.1744	0.000414002	0.00328148	0.00355252	0.00686652	0.00930752	0.00750252		-0.1744	-0.00252197	-0.00340325	-0.00410563	-0.0205756	-0.0131598	-0.00407236		-0.1744	-0.00248791	-1.90304e-05	-0.00144872	-0.0117547	-0.0117401	-0.00380933
-0.1742	0.000373981	0.000897693	0.00329313	0.00600065	0.0079204	0.00693012		-0.1742	0.000414768	0.00326504	0.00355007	0.00684945	0.00930173	0.00749704		-0.1742	-0.00252225	-0.00340502	-0.00410631	-0.0205837	-0.0131537	-0.00407389		-0.1742	-0.00248714	-3.54685e-05	-0.00145117	-0.0117718	-0.0117459	-0.00381481
-0.174	0.000374089	0.000893834	0.00329177	0.00599173	0.00792832	0.00693012		-0.174	0.000414976	0.00324929	0.00354773	0.00683717	0.00929655	0.00749003		-0.174	-0.00252214	-0.00340888	-0.00410767	-0.0205926	-0.0131458	-0.00407389		-0.174	-0.00248693	-5.12195e-05	-0.0014535	-0.0117841	-0.0117511	-0.00382182
-0.1738	0.000374631	0.000888077	0.00328911	0.00598423	0.00793655	0.0069289		-0.1738	0.000414489	0.00323199	0.00354411	0.00683098	0.00929197	0.00748454		-0.1738	-0.0025216	-0.00341464	-0.00411033	-0.0206001	-0.0131376	-0.00407511		-0.1738	-0.00248742	-6.85117e-05	-0.00145712	-0.0117903	-0.0117556	-0.00382731
-0.1736	0.000374089	0.000883855	0.00328743	0.00597887	0.00794722	0.00692677		-0.1736	0.00041435	0.00321627	0.00354157	0.00682524	0.00928893	0.0074821		-0.1736	-0.00252214	-0.00341886	-0.00411201	-0.0206054	-0.0131269	-0.00407724		-0.1736	-0.00248756	-8.42364e-05	-0.00145966	-0.011796	-0.0117587	-0.00382975
-0.1734	0.000373818	0.000881117	0.00328477	0.0059733	0.00795453	0.00692372		-0.1734	0.000415255	0.00320578	0.00353823	0.0068196	0.00928649	0.00747997		-0.1734	-0.00252241	-0.0034216	-0.00411467	-0.020611	-0.0131196	-0.00408029		-0.1734	-0.00248666	-9.47245e-05	-0.00146301	-0.0118017	-0.0117611	-0.00383188
-0.1732	0.000373764	0.000879002	0.00328182	0.00596845	0.00795819	0.00691854		-0.1732	0.000416856	0.00319926	0.003532	0.00681333	0.00928588	0.00747844		-0.1732	-0.00252246	-0.00342371	-0.00411762	-0.0206159	-0.0131159	-0.00408547		-0.1732	-0.00248505	-0.000101247	-0.00146923	-0.0118079	-0.0117617	-0.0038334
-0.173	0.000374197	0.000877624	0.00327848	0.00596507	0.00795972	0.00691305		-0.173	0.000417831	0.00318894	0.00352679	0.00680638	0.00928557	0.00747692		-0.173	-0.00252203	-0.00342509	-0.00412096	-0.0206193	-0.0131144	-0.00409096		-0.173	-0.00248408	-0.000111565	-0.00147444	-0.0118149	-0.011762	-0.00383493
-0.1728	0.000375172	0.000876947	0.00327496	0.00596159	0.0079588	0.00690635		-0.1728	0.000418457	0.00317519	0.00352267	0.00679806	0.00928557	0.00747326		-0.1728	-0.00252105	-0.00342577	-0.00412448	-0.0206227	-0.0131153	-0.00409766		-0.1728	-0.00248345	-0.000125312	-0.00147857	-0.0118232	-0.011762	-0.00383859
-0.1726	0.000376309	0.000874431	0.00327137	0.00596052	0.00795728	0.00690025		-0.1726	0.000418388	0.00315584	0.00351591	0.00679109	0.00928679	0.00747174		-0.1726	-0.00251992	-0.00342828	-0.00412807	-0.0206238	-0.0131168	-0.00410376		-0.1726	-0.00248352	-0.000144667	-0.00148533	-0.0118302	-0.0117608	-0.00384011
-0.1724	0.00037685	0.000870823	0.00326891	0.00596012	0.00795332	0.00689629		-0.1724	0.000419084	0.00313507	0.00351016	0.00678663	0.00928618	0.0074693		-0.1724	-0.00251938	-0.00343189	-0.00413053	-0.0206242	-0.0131208	-0.00410772		-0.1724	-0.00248283	-0.000165437	-0.00149107	-0.0118346	-0.0117614	-0.00384255
-0.1722	0.000376959	0.000867487	0.00326713	0.00596017	0.00794844	0.00689293		-0.1722	0.000419919	0.00311928	0.00350415	0.00678364	0.00928374	0.00747083		-0.1722	-0.00251927	-0.00343523	-0.00413231	-0.0206241	-0.0131257	-0.00411107		-0.1722	-0.00248199	-0.00018123	-0.00149708	-0.0118376	-0.0117639	-0.00384102
-0.172	0.000377175	0.000865148	0.00326598	0.00596253	0.00794173	0.00688684		-0.172	0.000419919	0.00310959	0.00349557	0.00678217	0.00928131	0.00747143		-0.172	-0.00251905	-0.00343757	-0.00413346	-0.0206218	-0.0131324	-0.00411717		-0.172	-0.00248199	-0.000190912	-0.00150567	-0.0118391	-0.0117663	-0.00384041
-0.1718	0.000377771	0.000863631	0.00326382	0.0059647	0.00793198	0.00688288		-0.1718	0.000419919	0.0031074	0.00348739	0.0067827	0.00927948	0.00747143		-0.1718	-0.00251845	-0.00343908	-0.00413562	-0.0206196	-0.0131421	-0.00412113		-0.1718	-0.00248199	-0.000193109	-0.00151384	-0.0118386	-0.0117681	-0.00384041
-0.1716	0.00037815	0.000862789	0.00326251	0.00596729	0.00792101	0.00687861		-0.1716	0.000420476	0.00310569	0.00348141	0.00678521	0.00927643	0.00747357		-0.1716	-0.00251808	-0.00343993	-0.00413694	-0.020617	-0.0131531	-0.0041254		-0.1716	-0.00248143	-0.000194815	-0.00151982	-0.011836	-0.0117712	-0.00383828
-0.1714	0.000377988	0.000863303	0.00325988	0.00596972	0.0079079	0.00687617		-0.1714	0.000421033	0.00309672	0.00347696	0.00678782	0.00927155	0.0074754		-0.1714	-0.00251824	-0.00343941	-0.00413957	-0.0206146	-0.0131662	-0.00412784		-0.1714	-0.00248088	-0.000203783	-0.00152428	-0.0118334	-0.0117761	-0.00383645
-0.1712	0.000377825	0.000864201	0.00325706	0.00597049	0.00789266	0.00687251		-0.1712	0.000421311	0.00308251	0.00347179	0.00679065	0.0092679	0.00747753		-0.1712	-0.0025184	-0.00343851	-0.00414238	-0.0206138	-0.0131815	-0.00413149		-0.1712	-0.0024806	-0.000217996	-0.00152944	-0.0118306	-0.0117797	-0.00383432
-0.171	0.000377771	0.000865908	0.00325575	0.00597091	0.0078759	0.00686946		-0.171	0.000421311	0.00307672	0.00347016	0.00679134	0.00926454	0.00747723		-0.171	-0.00251845	-0.00343681	-0.00414369	-0.0206134	-0.0131982	-0.00413454		-0.171	-0.0024806	-0.000223786	-0.00153108	-0.0118299	-0.0117831	-0.00383462
-0.1708	0.000377771	0.000867892	0.00325485	0.00597258	0.00785944	0.00686703		-0.1708	0.000421659	0.0030725	0.00346672	0.00678717	0.00925845	0.00747601		-0.1708	-0.00251845	-0.00343482	-0.00414459	-0.0206117	-0.0132147	-0.00413698		-0.1708	-0.00248025	-0.000228002	-0.00153451	-0.0118341	-0.0117892	-0.00383584
-0.1706	0.000377933	0.000868077	0.00325352	0.00597215	0.00784115	0.00686398		-0.1706	0.000422216	0.00306162	0.00346514	0.00678074	0.00924686	0.00747448		-0.1706	-0.00251829	-0.00343464	-0.00414592	-0.0206122	-0.013233	-0.00414003		-0.1706	-0.00247969	-0.000238883	-0.0015361	-0.0118405	-0.0118007	-0.00383737
-0.1704	0.000377717	0.000868535	0.00325356	0.00597308	0.00782317	0.0068591		-0.1704	0.000421938	0.00305675	0.0034628	0.00677387	0.0092365	0.00747143		-0.1704	-0.00251851	-0.00343418	-0.00414589	-0.0206112	-0.013251	-0.0041449		-0.1704	-0.00247997	-0.000243752	-0.00153843	-0.0118474	-0.0118111	-0.00384041
-0.1702	0.000378042	0.0008706	0.00325331	0.00597199	0.0078061	0.00685179		-0.1702	0.000421938	0.00304367	0.00346071	0.00677206	0.00922431	0.0074693		-0.1702	-0.00251818	-0.00343211	-0.00414614	-0.0206123	-0.013268	-0.00415222		-0.1702	-0.00247997	-0.000256837	-0.00154053	-0.0118492	-0.0118233	-0.00384255
-0.17	0.000378204	0.00087332	0.00325308	0.00597023	0.00778842	0.00684447		-0.17	0.000422216	0.00302849	0.0034599	0.00676307	0.00921334	0.00746747		-0.17	-0.00251802	-0.0034294	-0.00414636	-0.0206141	-0.0132857	-0.00415953		-0.17	-0.00247969	-0.000272016	-0.00154134	-0.0118582	-0.0118343	-0.00384438
-0.1698	0.000378367	0.00087518	0.00325359	0.00596884	0.00777227	0.00683868		-0.1698	0.000422008	0.00301727	0.00345817	0.0067503	0.00920084	0.00746656		-0.1698	-0.00251786	-0.00342754	-0.00414585	-0.0206155	-0.0133019	-0.00416533		-0.1698	-0.0024799	-0.000283235	-0.00154307	-0.011871	-0.0118468	-0.00384529
-0.1696	0.0003788	0.000875635	0.00325397	0.00596756	0.0077555	0.00683258		-0.1696	0.000422008	0.00301053	0.00345814	0.00673721	0.00918682	0.00746625		-0.1696	-0.00251743	-0.00342708	-0.00414547	-0.0206168	-0.0133186	-0.00417142		-0.1696	-0.0024799	-0.000289979	-0.0015431	-0.011884	-0.0118608	-0.0038456
-0.1694	0.000378637	0.000875183	0.00325418	0.00596441	0.00774026	0.0068271		-0.1694	0.000421799	0.00300453	0.0034577	0.00672911	0.00917432	0.00746564		-0.1694	-0.00251759	-0.00342753	-0.00414527	-0.0206199	-0.0133339	-0.00417691		-0.1694	-0.00248011	-0.000295974	-0.00154353	-0.0118921	-0.0118733	-0.00384621
-0.1692	0.000378475	0.000874099	0.00325472	0.00596064	0.00772563	0.00682557		-0.1692	0.000421799	0.00300078	0.00345791	0.00672081	0.00916152	0.00746412		-0.1692	-0.00251775	-0.00342862	-0.00414473	-0.0206237	-0.0133485	-0.00417843		-0.1692	-0.00248011	-0.000299728	-0.00154333	-0.0119004	-0.0118861	-0.00384773
-0.169	0.000378421	0.000871142	0.00325505	0.0059581	0.00771314	0.00682161		-0.169	0.000422147	0.00299873	0.00345662	0.00671396	0.00915177	0.00746381		-0.169	-0.00251781	-0.00343157	-0.00414439	-0.0206262	-0.013361	-0.00418239		-0.169	-0.00247976	-0.000301775	-0.00154462	-0.0119073	-0.0118958	-0.00384803
-0.1688	0.000378583	0.000870333	0.00325458	0.00595633	0.00770186	0.00681826		-0.1688	0.000422704	0.00299654	0.00345498	0.00670518	0.00914049	0.00746351		-0.1688	-0.00251764	-0.00343238	-0.00414486	-0.020628	-0.0133723	-0.00418575		-0.1688	-0.00247921	-0.000303965	-0.00154626	-0.0119161	-0.0119071	-0.00384834
-0.1686	0.000378421	0.000871385	0.00325327	0.00595317	0.00769485	0.0068146		-0.1686	0.000422843	0.0029942	0.0034535	0.00669792	0.00912982	0.00746138		-0.1686	-0.00251781	-0.00343133	-0.00414617	-0.0206311	-0.0133793	-0.0041894		-0.1686	-0.00247907	-0.000306309	-0.00154774	-0.0119233	-0.0119178	-0.00385047
-0.1684	0.000378312	0.000870909	0.00325066	0.00595118	0.00768571	0.00680912		-0.1684	0.000422564	0.00299084	0.00345317	0.00669228	0.00912068	0.00745924		-0.1684	-0.00251791	-0.00343181	-0.00414879	-0.0206331	-0.0133884	-0.00419489		-0.1684	-0.00247935	-0.000309665	-0.00154807	-0.011929	-0.0119269	-0.00385261
-0.1682	0.000378258	0.000869615	0.00324846	0.00594705	0.00767748	0.00680515		-0.1682	0.000422425	0.00298338	0.00345186	0.00668478	0.00911245	0.00745863		-0.1682	-0.00251797	-0.0034331	-0.00415099	-0.0206373	-0.0133966	-0.00419885		-0.1682	-0.00247949	-0.000317124	-0.00154937	-0.0119365	-0.0119352	-0.00385322
-0.168	0.000378258	0.000866872	0.00324537	0.00594399	0.00766925	0.00680028		-0.168	0.000422147	0.00297364	0.00345008	0.0066752	0.00910696	0.00746016		-0.168	-0.00251797	-0.00343584	-0.00415407	-0.0206403	-0.0134049	-0.00420373		-0.168	-0.00247976	-0.000326863	-0.00155115	-0.0119461	-0.0119406	-0.00385169
-0.1678	0.000378475	0.000865594	0.00324158	0.00594299	0.00766346	0.00679479		-0.1678	0.000421868	0.00296256	0.00344796	0.00666561	0.00910239	0.00746016		-0.1678	-0.00251775	-0.00343712	-0.00415786	-0.0206413	-0.0134107	-0.00420922		-0.1678	-0.00248004	-0.000337948	-0.00155327	-0.0119556	-0.0119452	-0.00385169
-0.1676	0.000378258	0.000863907	0.00323652	0.00594141	0.00765645	0.00678748		-0.1676	0.000421451	0.00295198	0.00344509	0.00665801	0.00909508	0.00746016		-0.1676	-0.00251797	-0.00343881	-0.00416292	-0.0206429	-0.0134177	-0.00421653		-0.1676	-0.00248046	-0.000348528	-0.00155615	-0.0119632	-0.0119525	-0.00385169
-0.1674	0.000378258	0.000862324	0.00323235	0.00593946	0.00764822	0.00677833		-0.1674	0.000421242	0.00294438	0.00344248	0.00665118	0.0090838	0.00746077		-0.1674	-0.00251797	-0.00344039	-0.0041671	-0.0206449	-0.0134259	-0.00422567		-0.1674	-0.00248067	-0.000356127	-0.00155876	-0.0119701	-0.0119638	-0.00385108
-0.1672	0.000378367	0.000862044	0.00322726	0.00593756	0.00763541	0.00676888		-0.1672	0.000421381	0.00293866	0.00343854	0.00664375	0.00907161	0.00746229		-0.1672	-0.00251786	-0.00344067	-0.00417218	-0.0206468	-0.0134387	-0.00423512		-0.1672	-0.00248053	-0.000361845	-0.0015627	-0.0119775	-0.011976	-0.00384956
-0.167	0.000378854	0.000862122	0.00322227	0.00593599	0.007622	0.00675913		-0.167	0.000421659	0.00293534	0.00343352	0.00664004	0.00906277	0.00746168		-0.167	-0.00251737	-0.00344059	-0.00417717	-0.0206483	-0.0134521	-0.00424488		-0.167	-0.00248025	-0.000365162	-0.00156771	-0.0119812	-0.0119848	-0.00385017
-0.1668	0.000378583	0.00086164	0.00321608	0.00593449	0.00760981	0.00674877		-0.1668	0.000421799	0.00293135	0.00342841	0.00663455	0.00906033	0.00746107		-0.1668	-0.00251764	-0.00344108	-0.00418336	-0.0206498	-0.0134643	-0.00425524		-0.1668	-0.00248011	-0.00036916	-0.00157283	-0.0119867	-0.0119873	-0.00385078
-0.1666	0.000378204	0.000860416	0.00320987	0.0059336	0.00760341	0.00673749		-0.1666	0.000421311	0.00292493	0.00342304	0.00662986	0.00906338	0.00746046		-0.1666	-0.00251802	-0.0034423	-0.00418957	-0.0206507	-0.0134707	-0.00426652		-0.1666	-0.0024806	-0.000375578	-0.0015782	-0.0119914	-0.0119842	-0.00385139
-0.1664	0.000378421	0.000859193	0.00320451	0.00593275	0.00760067	0.00672621		-0.1664	0.00042152	0.00291673	0.00341832	0.00662501	0.00906643	0.00745924		-0.1664	-0.00251781	-0.00344352	-0.00419493	-0.0206516	-0.0134735	-0.00427779		-0.1664	-0.00248039	-0.000383776	-0.00158292	-0.0119962	-0.0119812	-0.00385261
-0.1662	0.000378367	0.000858644	0.00319894	0.00593408	0.00759762	0.00671646		-0.1662	0.000421799	0.00290856	0.00341502	0.00662078	0.00907222	0.00745833		-0.1662	-0.00251786	-0.00344407	-0.0042005	-0.0206502	-0.0134765	-0.00428755		-0.1662	-0.00248011	-0.000391942	-0.00158621	-0.0120005	-0.0119754	-0.00385352
-0.166	0.000378746	0.000858837	0.00319497	0.00593406	0.00759762	0.00670701		-0.166	0.000421799	0.00290071	0.00341028	0.00662087	0.00907526	0.00745802		-0.166	-0.00251748	-0.00344388	-0.00420447	-0.0206503	-0.0134765	-0.004297		-0.166	-0.00248011	-0.000399793	-0.00159095	-0.0120004	-0.0119723	-0.00385383
-0.1658	0.00037907	0.000859249	0.00319191	0.00593436	0.00759427	0.00669847		-0.1658	0.000421938	0.00289484	0.003404	0.00661748	0.00907679	0.0074568		-0.1658	-0.00251716	-0.00344347	-0.00420753	-0.02065	-0.0134799	-0.00430553		-0.1658	-0.00247997	-0.000405665	-0.00159724	-0.0120038	-0.0119708	-0.00385504
-0.1656	0.000379016	0.000860105	0.0031896	0.00593434	0.00759061	0.00669025		-0.1656	0.000422216	0.00289095	0.00339975	0.00661255	0.00907892	0.00745711		-0.1656	-0.00251721	-0.00344261	-0.00420985	-0.02065	-0.0134835	-0.00431376		-0.1656	-0.00247969	-0.000409562	-0.00160148	-0.0120087	-0.0119687	-0.00385474
-0.1654	0.00037907	0.000860989	0.00318856	0.0059354	0.00758878	0.00668354		-0.1654	0.000422843	0.00288832	0.00339619	0.00660553	0.00908014	0.0074565		-0.1654	-0.00251716	-0.00344173	-0.00421088	-0.0206489	-0.0134853	-0.00432047		-0.1654	-0.00247907	-0.000412184	-0.00160505	-0.0120157	-0.0119675	-0.00385535
-0.1652	0.000379125	0.000861358	0.00318821	0.00593703	0.00758787	0.00667623		-0.1652	0.000422843	0.00288665	0.0033939	0.00659572	0.00907953	0.00745559		-0.1652	-0.0025171	-0.00344136	-0.00421123	-0.0206473	-0.0134863	-0.00432778		-0.1652	-0.00247907	-0.000413859	-0.00160734	-0.0120255	-0.0119681	-0.00385626
-0.165	0.000379233	0.00086216	0.00318909	0.00593721	0.00758421	0.00667196		-0.165	0.000422634	0.00288582	0.00339169	0.00658188	0.00907831	0.00745467		-0.165	-0.00251699	-0.00344056	-0.00421035	-0.0206471	-0.0134899	-0.00433205		-0.165	-0.00247928	-0.000414683	-0.00160954	-0.0120394	-0.0119693	-0.00385718
-0.1648	0.000379504	0.000863652	0.00319048	0.00593912	0.00758116	0.00667043		-0.1648	0.000422564	0.00288584	0.0033916	0.00656053	0.00907405	0.00745284		-0.1648	-0.00251672	-0.00343906	-0.00420896	-0.0206452	-0.013493	-0.00433357		-0.1648	-0.00247935	-0.000414671	-0.00160964	-0.0120607	-0.0119736	-0.00385901
-0.1646	0.000380099	0.000865549	0.00319108	0.00594166	0.00757506	0.00666617		-0.1646	0.000422286	0.00288448	0.00339111	0.00653895	0.0090649	0.00744949		-0.1646	-0.00251613	-0.00343717	-0.00420836	-0.0206427	-0.0134991	-0.00433784		-0.1646	-0.00247962	-0.000416027	-0.00161013	-0.0120823	-0.0119827	-0.00386236
-0.1644	0.000380749	0.000868033	0.0031932	0.00594284	0.00756714	0.00665824		-0.1644	0.000422216	0.00288114	0.00339094	0.00652356	0.00905576	0.00744431		-0.1644	-0.00251548	-0.00343468	-0.00420624	-0.0206415	-0.013507	-0.00434576		-0.1644	-0.00247969	-0.000419362	-0.00161029	-0.0120977	-0.0119918	-0.00386754
-0.1642	0.00038129	0.000871115	0.00319407	0.005943	0.00755708	0.00664575		-0.1642	0.000422077	0.00287791	0.00338943	0.00651376	0.0090457	0.00744126		-0.1642	-0.00251494	-0.0034316	-0.00420537	-0.0206413	-0.013517	-0.00435826		-0.1642	-0.00247983	-0.000422594	-0.0016118	-0.0121075	-0.0120019	-0.00387059
-0.164	0.000381615	0.000870955	0.0031929	0.00594377	0.00754733	0.0066302		-0.164	0.000422425	0.00287374	0.00338697	0.006496	0.00903534	0.00743852		-0.164	-0.00251461	-0.00343176	-0.00420655	-0.0206405	-0.0135268	-0.00437381		-0.164	-0.00247949	-0.000426762	-0.00161426	-0.0121253	-0.0120123	-0.00387333
-0.1638	0.000382048	0.000873795	0.00319204	0.00594446	0.00753514	0.00661496		-0.1638	0.000422356	0.0028709	0.00338532	0.00647628	0.00902436	0.0074373		-0.1638	-0.00251418	-0.00342892	-0.00420741	-0.0206399	-0.013539	-0.00438904		-0.1638	-0.00247956	-0.000429607	-0.00161592	-0.012145	-0.0120232	-0.00387455
-0.1636	0.000382969	0.000877857	0.00319127	0.00594494	0.00752294	0.00659881		-0.1636	0.000422286	0.00286858	0.0033849	0.00645913	0.00900973	0.00743394		-0.1636	-0.00251326	-0.00342486	-0.00420818	-0.0206394	-0.0135512	-0.0044052		-0.1636	-0.00247962	-0.000431927	-0.00161634	-0.0121621	-0.0120379	-0.0038779
-0.1634	0.00038351	0.000881584	0.0031897	0.00594401	0.00751136	0.00658296		-0.1634	0.000422286	0.00286594	0.00338268	0.0064447	0.00899632	0.00743212		-0.1634	-0.00251272	-0.00342113	-0.00420974	-0.0206403	-0.0135628	-0.00442105		-0.1634	-0.00247962	-0.000434571	-0.00161856	-0.0121766	-0.0120513	-0.00387973
-0.1632	0.00038324	0.000882756	0.00318778	0.00594487	0.00749856	0.0065668		-0.1632	0.00042152	0.00286128	0.00338148	0.0064357	0.00898291	0.00742602		-0.1632	-0.00251299	-0.00341996	-0.00421166	-0.0206394	-0.0135756	-0.0044372		-0.1632	-0.00248039	-0.00043923	-0.00161975	-0.0121856	-0.0120647	-0.00388583
-0.163	0.00038324	0.000882912	0.00318494	0.00594402	0.00748485	0.00655126		-0.163	0.000421381	0.00285371	0.00337895	0.00643173	0.00896889	0.00741871		-0.163	-0.00251299	-0.0034198	-0.0042145	-0.0206403	-0.0135893	-0.00445275		-0.163	-0.00248053	-0.000446795	-0.00162229	-0.0121895	-0.0120787	-0.00389314
-0.1628	0.000383998	0.000881019	0.00318096	0.00594422	0.00747357	0.00653785		-0.1628	0.000421242	0.00284797	0.00337637	0.00642884	0.00895761	0.00741413		-0.1628	-0.00251223	-0.0034217	-0.00421848	-0.0206401	-0.0136006	-0.00446616		-0.1628	-0.00248067	-0.000452538	-0.00162487	-0.0121924	-0.01209	-0.00389772
-0.1626	0.000384052	0.000880644	0.0031762	0.00594418	0.00746351	0.00652535		-0.1626	0.000421103	0.00284835	0.0033742	0.00642348	0.00894695	0.00741109		-0.1626	-0.00251217	-0.00342207	-0.00422324	-0.0206401	-0.0136106	-0.00447865		-0.1626	-0.00248081	-0.000452155	-0.00162703	-0.0121978	-0.0121007	-0.00390076
-0.1624	0.000383943	0.000881336	0.00317064	0.00594286	0.00745528	0.00652047		-0.1624	0.000421381	0.00284274	0.00337299	0.00640901	0.0089375	0.00740987		-0.1624	-0.00251228	-0.00342138	-0.0042288	-0.0206415	-0.0136188	-0.00448353		-0.1624	-0.00248053	-0.00045777	-0.00162825	-0.0122122	-0.0121101	-0.00390198
-0.1622	0.000383943	0.000882603	0.0031639	0.00594067	0.0074501	0.00650767		-0.1622	0.000421799	0.00283208	0.00336896	0.00639283	0.00892866	0.00741017		-0.1622	-0.00251228	-0.00342011	-0.00423554	-0.0206437	-0.013624	-0.00449633		-0.1622	-0.00248011	-0.000468427	-0.00163227	-0.0122284	-0.0121189	-0.00390168
-0.162	0.000384106	0.000885364	0.00315649	0.00593708	0.00744522	0.00649548		-0.162	0.000421868	0.0028237	0.00336447	0.00638198	0.00891951	0.00740895		-0.162	-0.00251212	-0.00341735	-0.00424295	-0.0206472	-0.0136289	-0.00450852		-0.162	-0.00248004	-0.000476802	-0.00163677	-0.0122393	-0.0121281	-0.0039029
-0.1618	0.000384593	0.000887848	0.00314841	0.00593572	0.00744309	0.00648116		-0.1618	0.000421033	0.00281651	0.00335745	0.00638024	0.00891342	0.00740438		-0.1618	-0.00251163	-0.00341487	-0.00425104	-0.0206486	-0.013631	-0.00452285		-0.1618	-0.00248088	-0.000483999	-0.00164378	-0.012241	-0.0121342	-0.00390747
-0.1616	0.000384593	0.000888256	0.00314106	0.00593422	0.00744278	0.00646592		-0.1616	0.000420824	0.00280621	0.00335311	0.00637117	0.00890793	0.00739859		-0.1616	-0.00251163	-0.00341446	-0.00425838	-0.0206501	-0.0136313	-0.00453809		-0.1616	-0.00248109	-0.000494296	-0.00164813	-0.0122501	-0.0121397	-0.00391326
-0.1614	0.000384539	0.000888653	0.00313529	0.00593321	0.00744278	0.00644793		-0.1614	0.000420824	0.00279639	0.0033499	0.00635715	0.00890336	0.00738884		-0.1614	-0.00251169	-0.00341406	-0.00426415	-0.0206511	-0.0136313	-0.00455607		-0.1614	-0.00248109	-0.000504116	-0.00165133	-0.0122641	-0.0121442	-0.00392301
-0.1612	0.000384539	0.000888952	0.00312989	0.00593363	0.00744431	0.00642965		-0.1612	0.000420476	0.00278397	0.00334699	0.00634277	0.00890031	0.00737786		-0.1612	-0.00251169	-0.00341376	-0.00426956	-0.0206507	-0.0136298	-0.00457436		-0.1612	-0.00248143	-0.000516535	-0.00165424	-0.0122785	-0.0121473	-0.00393399
-0.161	0.000384268	0.000888633	0.00312613	0.00593179	0.00744492	0.0064138		-0.161	0.000420824	0.00276561	0.00334532	0.00633134	0.00889879	0.00736659		-0.161	-0.00251196	-0.00341408	-0.00427331	-0.0206525	-0.0136292	-0.00459021		-0.161	-0.00248109	-0.000534898	-0.00165592	-0.0122899	-0.0121488	-0.00394526
-0.1608	0.000384106	0.000887957	0.00312037	0.00592992	0.00744736	0.00640496		-0.1608	0.000421381	0.00275372	0.00334209	0.00632392	0.00889605	0.00735378		-0.1608	-0.00251212	-0.00341476	-0.00427908	-0.0206544	-0.0136268	-0.00459905		-0.1608	-0.00248053	-0.00054679	-0.00165914	-0.0122973	-0.0121516	-0.00395807
-0.1606	0.000384106	0.000888011	0.0031156	0.00592959	0.00745193	0.00639886		-0.1606	0.000422008	0.00274546	0.00333899	0.00631748	0.00889513	0.00734312		-0.1606	-0.00251212	-0.0034147	-0.00428384	-0.0206547	-0.0136222	-0.00460514		-0.1606	-0.0024799	-0.000555044	-0.00166224	-0.0123038	-0.0121525	-0.00396873
-0.1604	0.000384431	0.000888924	0.00311068	0.00592758	0.00745955	0.00638911		-0.1604	0.000421799	0.00272948	0.00333508	0.006313	0.00889544	0.00733123		-0.1604	-0.0025118	-0.00341379	-0.00428876	-0.0206567	-0.0136146	-0.0046149		-0.1604	-0.00248011	-0.000571024	-0.00166615	-0.0123083	-0.0121522	-0.00398062
-0.1602	0.000384539	0.000892091	0.00310717	0.00592719	0.00746686	0.00637905		-0.1602	0.000421451	0.00271375	0.00332994	0.00630872	0.00889757	0.00732056		-0.1602	-0.00251169	-0.00341062	-0.00429228	-0.0206571	-0.0136073	-0.00462496		-0.1602	-0.00248046	-0.000586758	-0.0016713	-0.0123125	-0.01215	-0.00399129
-0.16	0.000384647	0.000894934	0.00310588	0.00592719	0.00747387	0.00636655		-0.16	0.00042159	0.00270176	0.00332499	0.00630409	0.00889787	0.00731081		-0.16	-0.00251158	-0.00340778	-0.00429356	-0.0206571	-0.0136002	-0.00463745		-0.16	-0.00248032	-0.000598748	-0.00167625	-0.0123172	-0.0121497	-0.00400104
-0.1598	0.000384918	0.000895255	0.00310526	0.0059258	0.0074818	0.00635375		-0.1598	0.000422077	0.00269068	0.00332265	0.00629938	0.00889726	0.00729984		-0.1598	-0.00251131	-0.00340746	-0.00429419	-0.0206585	-0.0135923	-0.00465025		-0.1598	-0.00247983	-0.000609822	-0.00167859	-0.0123219	-0.0121503	-0.00401201
-0.1596	0.000384864	0.000896679	0.00310392	0.00592382	0.00749155	0.00634126		-0.1596	0.000422008	0.00268169	0.00332262	0.00629454	0.00889726	0.00728917		-0.1596	-0.00251136	-0.00340604	-0.00429552	-0.0206605	-0.0135826	-0.00466275		-0.1596	-0.0024799	-0.000618814	-0.00167862	-0.0123267	-0.0121503	-0.00402268
-0.1594	0.000385135	0.000899836	0.0031044	0.00592363	0.00750161	0.00632541		-0.1594	0.000422286	0.0026739	0.00332109	0.00629249	0.00889513	0.00728063		-0.1594	-0.00251109	-0.00340288	-0.00429505	-0.0206607	-0.0135725	-0.0046786		-0.1594	-0.00247962	-0.000626604	-0.00168015	-0.0123288	-0.0121525	-0.00403122
-0.1592	0.000385243	0.00090204	0.00310566	0.00592291	0.00751167	0.00630803		-0.1592	0.000422495	0.00265905	0.00332044	0.00628904	0.00889483	0.00727057		-0.1592	-0.00251098	-0.00340067	-0.00429379	-0.0206614	-0.0135625	-0.00469597		-0.1592	-0.00247942	-0.000641456	-0.00168079	-0.0123322	-0.0121528	-0.00404127
-0.159	0.000385784	0.000903759	0.00310812	0.00592096	0.00752416	0.00628914		-0.159	0.000422495	0.00264509	0.00332065	0.00628553	0.00889361	0.00726113		-0.159	-0.00251044	-0.00339896	-0.00429133	-0.0206634	-0.01355	-0.00471487		-0.159	-0.00247942	-0.000655413	-0.00168058	-0.0123357	-0.012154	-0.00405072
-0.1588	0.000385784	0.000904955	0.00311083	0.00592027	0.00753666	0.00626871		-0.1588	0.000422634	0.00263581	0.00332053	0.00628242	0.00889269	0.00725168		-0.1588	-0.00251044	-0.00339776	-0.00428861	-0.020664	-0.0135375	-0.00473529		-0.1588	-0.00247928	-0.000664694	-0.00168071	-0.0123388	-0.0121549	-0.00406017
-0.1586	0.000385839	0.000906385	0.00311485	0.00592007	0.00754733	0.00625408		-0.1586	0.000422564	0.00262524	0.00332056	0.00628007	0.00889178	0.00724284		-0.1586	-0.00251039	-0.00339633	-0.00428459	-0.0206643	-0.0135268	-0.00474992		-0.1586	-0.00247935	-0.000675263	-0.00168068	-0.0123412	-0.0121558	-0.00406901
-0.1584	0.000385947	0.000906919	0.00311944	0.00592003	0.0075583	0.00624128		-0.1584	0.000422634	0.00261014	0.00331917	0.00627678	0.008893	0.00723796		-0.1584	-0.00251028	-0.0033958	-0.00428	-0.0206643	-0.0135158	-0.00476272		-0.1584	-0.00247928	-0.000690366	-0.00168206	-0.0123445	-0.0121546	-0.00407389
-0.1582	0.000385676	0.00090735	0.0031225	0.00591982	0.00756927	0.0062233		-0.1582	0.000422704	0.00259204	0.00331795	0.00627563	0.00889239	0.00723674		-0.1582	-0.00251055	-0.00339536	-0.00427694	-0.0206645	-0.0135048	-0.00478071		-0.1582	-0.00247921	-0.000708465	-0.00168328	-0.0123456	-0.0121552	-0.00407511
-0.158	0.000385784	0.000907887	0.00312538	0.00592001	0.00757994	0.0062041		-0.158	0.000422773	0.00257406	0.00331444	0.00627375	0.008893	0.00723613		-0.158	-0.00251044	-0.00339483	-0.00427407	-0.0206643	-0.0134942	-0.00479991		-0.158	-0.00247914	-0.000726444	-0.0016868	-0.0123475	-0.0121546	-0.00407572
-0.1578	0.000385568	0.000909795	0.00312851	0.00591863	0.00758787	0.00618611		-0.1578	0.000423261	0.00255734	0.00331268	0.0062723	0.00889178	0.007234		-0.1578	-0.00251066	-0.00339292	-0.00427093	-0.0206657	-0.0134863	-0.00481789		-0.1578	-0.00247865	-0.000743169	-0.00168855	-0.012349	-0.0121558	-0.00407785
-0.1576	0.000385405	0.000912209	0.00312948	0.00591856	0.00759671	0.00616752		-0.1576	0.000423609	0.00253215	0.00331031	0.00626988	0.00889147	0.00722912		-0.1576	-0.00251082	-0.00339051	-0.00426997	-0.0206658	-0.0134774	-0.00483648		-0.1576	-0.0024783	-0.000768354	-0.00169093	-0.0123514	-0.0121561	-0.00408273
-0.1574	0.000385622	0.000914743	0.0031297	0.00591819	0.00760311	0.00615137		-0.1574	0.000423609	0.00250846	0.00330781	0.00626808	0.00889056	0.0072215		-0.1574	-0.0025106	-0.00338797	-0.00426974	-0.0206661	-0.013471	-0.00485264		-0.1574	-0.0024783	-0.000792048	-0.00169343	-0.0123532	-0.012157	-0.00409035
-0.1572	0.00038573	0.000917651	0.00312845	0.00591853	0.00761073	0.00613796		-0.1572	0.000423469	0.00247646	0.00330528	0.00626745	0.00889056	0.00721144		-0.1572	-0.0025105	-0.00338506	-0.004271	-0.0206658	-0.0134634	-0.00486605		-0.1572	-0.00247844	-0.000824046	-0.00169596	-0.0123538	-0.012157	-0.0041004
-0.157	0.000385947	0.000919984	0.00312754	0.00591895	0.00761713	0.00612729		-0.157	0.000423539	0.00244843	0.00330354	0.00626553	0.00888964	0.00720139		-0.157	-0.00251028	-0.00338273	-0.0042719	-0.0206654	-0.013457	-0.00487672		-0.157	-0.00247837	-0.000852077	-0.0016977	-0.0123557	-0.012158	-0.00411046
-0.1568	0.000385893	0.000922293	0.00312411	0.0059197	0.00762292	0.00612119		-0.1568	0.000423818	0.00243117	0.00330084	0.00626355	0.00888843	0.00718859		-0.1568	-0.00251033	-0.00338042	-0.00427533	-0.0206646	-0.0134512	-0.00488281		-0.1568	-0.00247809	-0.000869332	-0.0017004	-0.0123577	-0.0121592	-0.00412326
-0.1566	0.00038573	0.000924099	0.00311986	0.00591888	0.00762901	0.00611754		-0.1566	0.000423678	0.00241302	0.00329849	0.00626323	0.00888812	0.00717822		-0.1566	-0.0025105	-0.00337862	-0.00427958	-0.0206654	-0.0134451	-0.00488647		-0.1566	-0.00247823	-0.000887485	-0.00170275	-0.012358	-0.0121595	-0.00413363
-0.1564	0.000385893	0.000924843	0.00311413	0.00591849	0.00763694	0.00611601		-0.1564	0.000424096	0.00239408	0.00329682	0.00626147	0.00888964	0.00716634		-0.1564	-0.00251033	-0.00337787	-0.00428531	-0.0206658	-0.0134372	-0.00488799		-0.1564	-0.00247781	-0.00090643	-0.00170442	-0.0123598	-0.012158	-0.00414551
-0.1562	0.000386055	0.000925249	0.00310837	0.00591864	0.00764608	0.00611266		-0.1562	0.000423748	0.00237988	0.00329459	0.00626232	0.00888964	0.00715689		-0.1562	-0.00251017	-0.00337747	-0.00429107	-0.0206657	-0.013428	-0.00489135		-0.1562	-0.00247816	-0.000920625	-0.00170664	-0.0123589	-0.012158	-0.00415496
-0.156	0.000386163	0.00092488	0.00310126	0.00591744	0.0076534	0.00610687		-0.156	0.000423957	0.00236689	0.00329241	0.00626225	0.00888873	0.00715384		-0.156	-0.00251006	-0.00337784	-0.00429819	-0.0206669	-0.0134207	-0.00489714		-0.156	-0.00247795	-0.000933618	-0.00170882	-0.012359	-0.0121589	-0.00415801
-0.1558	0.000386651	0.000925018	0.00309454	0.00591687	0.00766132	0.00610138		-0.1558	0.000423957	0.00235046	0.00328965	0.00626344	0.00888904	0.0071517		-0.1558	-0.00250958	-0.0033777	-0.0043049	-0.0206674	-0.0134128	-0.00490262		-0.1558	-0.00247795	-0.000950051	-0.00171158	-0.0123578	-0.0121586	-0.00416014
-0.1556	0.000386542	0.000924999	0.00308763	0.00591643	0.00767108	0.0060962		-0.1556	0.000423748	0.00233096	0.00328742	0.00626652	0.00888995	0.00714561		-0.1556	-0.00250968	-0.00337772	-0.00431181	-0.0206679	-0.013403	-0.00490781		-0.1556	-0.00247816	-0.000969547	-0.00171381	-0.0123547	-0.0121577	-0.00416624
-0.1554	0.000386651	0.000925545	0.00308255	0.00591843	0.00768235	0.0060895		-0.1554	0.000423678	0.00230629	0.00328636	0.00626781	0.00888934	0.0071389		-0.1554	-0.00250958	-0.00337717	-0.00431689	-0.0206659	-0.0133918	-0.00491451		-0.1554	-0.00247823	-0.000994214	-0.00171488	-0.0123534	-0.0121583	-0.00417295
-0.1552	0.00038638	0.000926373	0.00307735	0.00591879	0.0076918	0.00608309		-0.1552	0.000423539	0.00228345	0.00328471	0.00627022	0.00888904	0.00713006		-0.1552	-0.00250985	-0.00337634	-0.00432209	-0.0206655	-0.0133823	-0.00492091		-0.1552	-0.00247837	-0.00101706	-0.00171653	-0.012351	-0.0121586	-0.00418178
-0.155	0.000386542	0.000926558	0.00307305	0.00591917	0.00770216	0.0060773		-0.155	0.000423609	0.00226647	0.00328599	0.00627158	0.00888782	0.00712092		-0.155	-0.00250968	-0.00337616	-0.00432639	-0.0206651	-0.013372	-0.0049267		-0.155	-0.0024783	-0.00103404	-0.00171524	-0.0123497	-0.0121598	-0.00419093
-0.1548	0.000386488	0.000926153	0.00306894	0.00591905	0.00771253	0.00607029		-0.1548	0.000423818	0.00225421	0.00328561	0.00627276	0.00888721	0.00711513		-0.1548	-0.00250974	-0.00337656	-0.00433051	-0.0206653	-0.0133616	-0.00493371		-0.1548	-0.00247809	-0.0010463	-0.00171562	-0.0123485	-0.0121604	-0.00419672
-0.1546	0.00038638	0.000926867	0.00306567	0.00591935	0.0077232	0.00606267		-0.1546	0.000423887	0.00224139	0.00328752	0.00627261	0.00888751	0.0071133		-0.1546	-0.00250985	-0.00337585	-0.00433378	-0.020665	-0.0133509	-0.00494133		-0.1546	-0.00247802	-0.00105911	-0.00171371	-0.0123486	-0.0121601	-0.00419855
-0.1544	0.000386434	0.000927086	0.00306363	0.00591996	0.00773539	0.00605597		-0.1544	0.000423818	0.00222027	0.00328785	0.00627409	0.0088869	0.00711452		-0.1544	-0.00250979	-0.00337563	-0.00433581	-0.0206644	-0.0133387	-0.00494804		-0.1544	-0.00247809	-0.00108023	-0.00171338	-0.0123472	-0.0121607	-0.00419733
-0.1542	0.000385947	0.000927346	0.00306188	0.00592127	0.00774666	0.00604957		-0.1542	0.000423748	0.00219618	0.00328881	0.00627755	0.00888782	0.00711208		-0.1542	-0.00251028	-0.00337537	-0.00433756	-0.020663	-0.0133275	-0.00495444		-0.1542	-0.00247816	-0.00110432	-0.00171242	-0.0123437	-0.0121598	-0.00419977
-0.154	0.000385514	0.000927031	0.00306005	0.00592216	0.00776129	0.00604256		-0.154	0.000423678	0.00217454	0.00328984	0.00628013	0.00888812	0.00710934		-0.154	-0.00251071	-0.00337568	-0.00433939	-0.0206622	-0.0133128	-0.00496145		-0.154	-0.00247823	-0.00112597	-0.0017114	-0.0123411	-0.0121595	-0.00420251
-0.1538	0.000385622	0.000926388	0.00306148	0.00592256	0.00777775	0.00603738		-0.1538	0.000423191	0.00215806	0.00329222	0.00628345	0.00889025	0.00710477		-0.1538	-0.0025106	-0.00337633	-0.00433796	-0.0206618	-0.0132964	-0.00496663		-0.1538	-0.00247872	-0.00114245	-0.00170902	-0.0123378	-0.0121573	-0.00420708
-0.1536	0.000385676	0.000924653	0.00306247	0.00592389	0.00779452	0.00603219		-0.1536	0.000423261	0.00214726	0.00329311	0.00628465	0.00889239	0.00709745		-0.1536	-0.00251055	-0.00337806	-0.00433697	-0.0206604	-0.0132796	-0.00497181		-0.1536	-0.00247865	-0.00115325	-0.00170813	-0.0123366	-0.0121552	-0.0042144
-0.1534	0.000385405	0.000920915	0.0030645	0.00592391	0.00781372	0.00602854		-0.1534	0.000423261	0.00214292	0.00329416	0.00628715	0.00889513	0.00708983		-0.1534	-0.00251082	-0.0033818	-0.00433494	-0.0206604	-0.0132604	-0.00497547		-0.1534	-0.00247865	-0.00115758	-0.00170707	-0.0123341	-0.0121525	-0.00422202
-0.1532	0.000385243	0.0009165	0.00306603	0.00592428	0.00782987	0.00602488		-0.1532	0.000423052	0.00214028	0.00329579	0.00628891	0.00889696	0.00708374		-0.1532	-0.00251098	-0.00338622	-0.00433341	-0.02066	-0.0132442	-0.00497913		-0.1532	-0.00247886	-0.00116023	-0.00170544	-0.0123323	-0.0121506	-0.00422811
-0.153	0.000385026	0.000912364	0.00306507	0.00592449	0.00784694	0.00602092		-0.153	0.000422634	0.0021365	0.00329792	0.00629195	0.00889848	0.00707947		-0.153	-0.0025112	-0.00339035	-0.00433437	-0.0206598	-0.0132272	-0.00498309		-0.153	-0.00247928	-0.00116401	-0.00170331	-0.0123293	-0.0121491	-0.00423238
-0.1528	0.000384918	0.000911613	0.00306564	0.00592488	0.00786523	0.00601848		-0.1528	0.000422704	0.00213049	0.00329983	0.00629572	0.00889757	0.00707368		-0.1528	-0.00251131	-0.0033911	-0.0043338	-0.0206594	-0.0132089	-0.00498553		-0.1528	-0.00247921	-0.00117002	-0.0017014	-0.0123255	-0.01215	-0.00423817
-0.1526	0.000385243	0.000911385	0.00306609	0.00592412	0.00788321	0.00601634		-0.1526	0.000422843	0.00212176	0.00330219	0.00629668	0.00889696	0.00706911		-0.1526	-0.00251098	-0.00339133	-0.00433336	-0.0206602	-0.0131909	-0.00498766		-0.1526	-0.00247907	-0.00117874	-0.00169904	-0.0123246	-0.0121506	-0.00424274
-0.1524	0.00038546	0.000910508	0.00306423	0.00592394	0.00790394	0.00601482		-0.1524	0.000423191	0.00211293	0.00330378	0.00629632	0.00889787	0.00706453		-0.1524	-0.00251077	-0.00339221	-0.00433522	-0.0206604	-0.0131702	-0.00498919		-0.1524	-0.00247872	-0.00118757	-0.00169745	-0.0123249	-0.0121497	-0.00424732
-0.1522	0.000385405	0.000909784	0.00306375	0.00592383	0.00792253	0.00601421		-0.1522	0.000423261	0.00210688	0.00330601	0.00629386	0.00889818	0.00705996		-0.1522	-0.00251082	-0.00339293	-0.00433569	-0.0206605	-0.0131516	-0.0049898		-0.1522	-0.00247865	-0.00119363	-0.00169523	-0.0123274	-0.0121494	-0.00425189
-0.152	0.000385568	0.000908942	0.00306205	0.00592278	0.00794204	0.00601269		-0.152	0.000423609	0.00210234	0.00330719	0.00629257	0.00890214	0.00705478		-0.152	-0.00251066	-0.00339377	-0.00433739	-0.0206615	-0.0131321	-0.00499132		-0.152	-0.0024783	-0.00119817	-0.00169404	-0.0123287	-0.0121455	-0.00425707
-0.1518	0.000385622	0.000907331	0.00305915	0.00592186	0.00796429	0.00601086		-0.1518	0.000424374	0.00209499	0.00331059	0.00629079	0.00890488	0.00705204		-0.1518	-0.0025106	-0.00339538	-0.00434029	-0.0206625	-0.0131098	-0.00499315		-0.1518	-0.00247754	-0.00120551	-0.00169064	-0.0123305	-0.0121427	-0.00425981
-0.1516	0.000385893	0.000904594	0.0030563	0.00591992	0.00799081	0.00600994		-0.1516	0.000425001	0.0020882	0.00331183	0.00628905	0.00890854	0.0070496		-0.1516	-0.00251033	-0.00339812	-0.00434314	-0.0206644	-0.0130833	-0.00499406		-0.1516	-0.00247691	-0.0012123	-0.00168941	-0.0123322	-0.0121391	-0.00426225
-0.1514	0.000385784	0.000902288	0.00305263	0.00591821	0.00801915	0.0060069		-0.1514	0.000425488	0.00208104	0.00331141	0.00628648	0.00891494	0.0070496		-0.1514	-0.00251044	-0.00340043	-0.00434682	-0.0206661	-0.013055	-0.00499711		-0.1514	-0.00247642	-0.00121947	-0.00168982	-0.0123348	-0.0121327	-0.00426225
-0.1512	0.000385514	0.000901013	0.00304883	0.00591802	0.00804689	0.00600629		-0.1512	0.000425697	0.00207596	0.00331172	0.00628455	0.00891951	0.0070499		-0.1512	-0.00251071	-0.0034017	-0.00435061	-0.0206663	-0.0130272	-0.00499772		-0.1512	-0.00247621	-0.00122454	-0.00168951	-0.0123367	-0.0121281	-0.00426195
-0.151	0.000385514	0.000899664	0.00304497	0.00591677	0.00806975	0.00600415		-0.151	0.000426045	0.00207162	0.0033125	0.00628372	0.00892561	0.00705021		-0.151	-0.00251071	-0.00340305	-0.00435448	-0.0206675	-0.0130044	-0.00499985		-0.151	-0.00247587	-0.00122888	-0.00168874	-0.0123375	-0.012122	-0.00426164
-0.1508	0.000385514	0.000897144	0.00304126	0.00591652	0.00808621	0.00600293		-0.1508	0.000426463	0.00206938	0.00331153	0.00628268	0.00893171	0.0070496		-0.1508	-0.00251071	-0.00340557	-0.00435818	-0.0206678	-0.0129879	-0.00500107		-0.1508	-0.00247545	-0.00123112	-0.0016897	-0.0123386	-0.0121159	-0.00426225
-0.1506	0.000385568	0.000896013	0.00303846	0.00591691	0.00809626	0.00600263		-0.1506	0.000426881	0.00206177	0.003311	0.00627468	0.00893963	0.0070499		-0.1506	-0.00251066	-0.0034067	-0.00436098	-0.0206674	-0.0129779	-0.00500138		-0.1506	-0.00247503	-0.00123874	-0.00169023	-0.0123466	-0.012108	-0.00426195
-0.1504	0.000385297	0.000893755	0.00303483	0.0059161	0.00810602	0.0060011		-0.1504	0.000427716	0.00205064	0.00331123	0.00626324	0.00894908	0.00704929		-0.1504	-0.00251093	-0.00340896	-0.00436462	-0.0206682	-0.0129681	-0.0050029		-0.1504	-0.0024742	-0.00124987	-0.00169	-0.012358	-0.0120985	-0.00426256
-0.1502	0.000385189	0.000890832	0.00303161	0.00591671	0.00811608	0.00600141		-0.1502	0.000428969	0.00204004	0.00331182	0.00625124	0.00895883	0.00704868		-0.1502	-0.00251104	-0.00341188	-0.00436784	-0.0206676	-0.012958	-0.0050026		-0.1502	-0.00247294	-0.00126047	-0.00168942	-0.01237	-0.0120888	-0.00426316
-0.15	0.000385243	0.000888651	0.0030307	0.0059162	0.00812339	0.00600141		-0.15	0.000429735	0.0020306	0.00331253	0.00624953	0.00897316	0.00704929		-0.15	-0.00251098	-0.00341406	-0.00436874	-0.0206681	-0.0129507	-0.0050026		-0.15	-0.00247218	-0.0012699	-0.00168871	-0.0123717	-0.0120744	-0.00426256
-0.1498	0.000385297	0.000887333	0.00302881	0.00591575	0.0081301	0.00600141		-0.1498	0.000430431	0.00202511	0.0033134	0.0062478	0.00899206	0.00704777		-0.1498	-0.00251093	-0.00341538	-0.00437063	-0.0206686	-0.012944	-0.0050026		-0.1498	-0.00247148	-0.00127539	-0.00168784	-0.0123735	-0.0120555	-0.00426408
-0.1496	0.000385514	0.000887068	0.00302875	0.00591559	0.00813833	0.0060011		-0.1496	0.000430431	0.00202129	0.00331462	0.00624052	0.0090073	0.00704503		-0.1496	-0.00251071	-0.00341565	-0.00437069	-0.0206687	-0.0129358	-0.0050029		-0.1496	-0.00247148	-0.00127922	-0.00168661	-0.0123807	-0.0120403	-0.00426682
-0.1494	0.000385189	0.000886499	0.00302865	0.00591518	0.00815082	0.00600019		-0.1494	0.000430849	0.00201616	0.00331671	0.00623231	0.00901583	0.00704106		-0.1494	-0.00251104	-0.00341622	-0.00437079	-0.0206691	-0.0129233	-0.00500382		-0.1494	-0.00247106	-0.00128435	-0.00168453	-0.0123889	-0.0120318	-0.00427078
-0.1492	0.000385026	0.000886012	0.00302958	0.00591437	0.0081685	0.0060011		-0.1492	0.000431266	0.0020076	0.00331908	0.00622685	0.00902436	0.00703985		-0.1492	-0.0025112	-0.0034167	-0.00436986	-0.02067	-0.0129056	-0.0050029		-0.1492	-0.00247064	-0.00129291	-0.00168215	-0.0123944	-0.0120232	-0.004272
-0.149	0.000384702	0.000885912	0.00303053	0.00591337	0.00818984	0.00600171		-0.149	0.000430849	0.00199776	0.00331938	0.00622294	0.00903899	0.00703588		-0.149	-0.00251152	-0.0034168	-0.00436892	-0.0206709	-0.0128843	-0.00500229		-0.149	-0.00247106	-0.00130274	-0.00168185	-0.0123983	-0.0120086	-0.00427597
-0.1488	0.000384485	0.000886071	0.00303177	0.00591293	0.00820721	0.00600171		-0.1488	0.000430918	0.0019891	0.00332112	0.00621868	0.00905271	0.00703344		-0.1488	-0.00251174	-0.00341664	-0.00436768	-0.0206714	-0.0128669	-0.00500229		-0.1488	-0.00247099	-0.0013114	-0.00168011	-0.0124026	-0.0119949	-0.0042784
-0.1486	0.000384593	0.000885621	0.00303456	0.0059118	0.00822275	0.00600202		-0.1486	0.000431336	0.0019835	0.0033236	0.00621422	0.00907008	0.0070307		-0.1486	-0.00251163	-0.00341709	-0.00436489	-0.0206725	-0.0128514	-0.00500199		-0.1486	-0.00247058	-0.00131701	-0.00167763	-0.012407	-0.0119775	-0.00428115
-0.1484	0.000384918	0.000885538	0.00303869	0.00591146	0.00823525	0.00600354		-0.1484	0.000431336	0.00197953	0.0033288	0.00620908	0.00908654	0.00702826		-0.1484	-0.00251131	-0.00341718	-0.00436075	-0.0206729	-0.0128389	-0.00500046		-0.1484	-0.00247058	-0.00132098	-0.00167243	-0.0124122	-0.0119611	-0.00428359
-0.1482	0.000385135	0.000885227	0.0030419	0.00591117	0.00824927	0.00600598		-0.1482	0.000431475	0.0019765	0.00333385	0.00620731	0.00910056	0.00702796		-0.1482	-0.00251109	-0.00341749	-0.00435754	-0.0206732	-0.0128249	-0.00499802		-0.1482	-0.00247044	-0.00132401	-0.00166739	-0.0124139	-0.011947	-0.00428389
-0.148	0.000385135	0.000885146	0.00304536	0.00591091	0.00826207	0.00600781		-0.148	0.000431684	0.00197299	0.00333823	0.00620917	0.00911154	0.00702582		-0.148	-0.00251109	-0.00341757	-0.00435408	-0.0206734	-0.012812	-0.0049962		-0.148	-0.00247023	-0.00132752	-0.00166301	-0.0124121	-0.0119361	-0.00428602
-0.1478	0.000385514	0.000884854	0.00304833	0.00591003	0.00827609	0.00601086		-0.1478	0.000431684	0.00196776	0.00334375	0.00621482	0.0091219	0.007024		-0.1478	-0.00251071	-0.00341786	-0.00435112	-0.0206743	-0.012798	-0.00499315		-0.1478	-0.00247023	-0.00133275	-0.00165748	-0.0124064	-0.0119257	-0.00428785
-0.1476	0.000385351	0.000884821	0.00305233	0.00590925	0.00829011	0.00601391		-0.1476	0.000431336	0.00196348	0.0033489	0.00622473	0.00912952	0.00702339		-0.1476	-0.00251087	-0.00341789	-0.00434711	-0.0206751	-0.012784	-0.0049901		-0.1476	-0.00247058	-0.00133703	-0.00165233	-0.0123965	-0.0119181	-0.00428846
-0.1474	0.000385297	0.000884983	0.00305551	0.0059092	0.00830383	0.00601421		-0.1474	0.000430849	0.00195806	0.00335426	0.00623639	0.00913561	0.00702064		-0.1474	-0.00251093	-0.00341773	-0.00434393	-0.0206751	-0.0127703	-0.0049898		-0.1474	-0.00247106	-0.00134245	-0.00164697	-0.0123849	-0.011912	-0.00429121
-0.1472	0.000385243	0.000884887	0.0030579	0.0059086	0.00831785	0.00601604		-0.1472	0.000429665	0.00195246	0.00335785	0.00623856	0.00914019	0.0070182		-0.1472	-0.00251098	-0.00341783	-0.00434154	-0.0206757	-0.0127563	-0.00498797		-0.1472	-0.00247225	-0.00134804	-0.00164339	-0.0123827	-0.0119074	-0.00429364
-0.147	0.000385351	0.000883839	0.00305926	0.00590764	0.00833431	0.00601513		-0.147	0.000429317	0.00194751	0.00336099	0.00623836	0.00914293	0.00701485		-0.147	-0.00251087	-0.00341888	-0.00434019	-0.0206767	-0.0127398	-0.00498888		-0.147	-0.00247259	-0.00135299	-0.00164025	-0.0123829	-0.0119047	-0.004297
-0.1468	0.000385514	0.000883032	0.00306136	0.00590701	0.00835107	0.00601573		-0.1468	0.000429387	0.00194426	0.0033646	0.00624436	0.00914567	0.00701241		-0.1468	-0.00251071	-0.00341968	-0.00433809	-0.0206773	-0.012723	-0.00498827		-0.1468	-0.00247252	-0.00135625	-0.00163664	-0.0123769	-0.0119019	-0.00429944
-0.1466	0.00038546	0.00088215	0.00306347	0.0059074	0.00836875	0.00601604		-0.1466	0.000429178	0.00194153	0.00336825	0.00625439	0.00914781	0.00701028		-0.1466	-0.00251077	-0.00342057	-0.00433597	-0.0206769	-0.0127054	-0.00498797		-0.1466	-0.00247273	-0.00135897	-0.00163298	-0.0123669	-0.0118998	-0.00430157
-0.1464	0.000384972	0.000881296	0.00306711	0.0059078	0.00838643	0.00601939		-0.1464	0.00042883	0.00193861	0.00337231	0.00625833	0.00914476	0.00700784		-0.1464	-0.00251125	-0.00342142	-0.00433233	-0.0206765	-0.0126877	-0.00498461		-0.1464	-0.00247308	-0.00136189	-0.00162892	-0.0123629	-0.0119028	-0.00430401
-0.1462	0.000384647	0.000880363	0.00306914	0.00590781	0.00840807	0.00602366		-0.1462	0.000428203	0.00193464	0.00337474	0.00625816	0.00914628	0.00700479		-0.1462	-0.00251158	-0.00342235	-0.0043303	-0.0206765	-0.0126661	-0.00498035		-0.1462	-0.00247371	-0.00136587	-0.00162649	-0.0123631	-0.0119013	-0.00430706
-0.146	0.000384918	0.000880161	0.00307091	0.0059082	0.00842697	0.00602915		-0.146	0.000427577	0.00192971	0.00337568	0.00626097	0.00914872	0.00700236		-0.146	-0.00251131	-0.00342255	-0.00432854	-0.0206761	-0.0126472	-0.00497486		-0.146	-0.00247433	-0.0013708	-0.00162555	-0.0123603	-0.0118989	-0.00430949
-0.1458	0.000385081	0.000879924	0.00307271	0.00590793	0.00844617	0.00603616		-0.1458	0.000426741	0.0019221	0.00337541	0.00626948	0.00915177	0.00700083		-0.1458	-0.00251115	-0.00342279	-0.00432673	-0.0206764	-0.012628	-0.00496785		-0.1458	-0.00247517	-0.00137841	-0.00162583	-0.0123518	-0.0118958	-0.00431102
-0.1456	0.000385297	0.000879956	0.00307489	0.00590863	0.00846568	0.00604408		-0.1456	0.000425836	0.0019138	0.00337391	0.00628182	0.00915451	0.00699992		-0.1456	-0.00251093	-0.00342276	-0.00432455	-0.0206757	-0.0126084	-0.00495993		-0.1456	-0.00247607	-0.0013867	-0.00162732	-0.0123394	-0.0118931	-0.00431193
-0.1454	0.000385405	0.000880239	0.00307658	0.0059091	0.00848213	0.00605261		-0.1454	0.000425349	0.00190488	0.00337349	0.00629867	0.00915786	0.006999		-0.1454	-0.00251082	-0.00342248	-0.00432287	-0.0206752	-0.012592	-0.00495139		-0.1454	-0.00247656	-0.00139562	-0.00162775	-0.0123226	-0.0118897	-0.00431285
-0.1452	0.00038573	0.000879946	0.00307717	0.00590893	0.00849737	0.00606237		-0.1452	0.000425071	0.00189337	0.00337348	0.00631249	0.00916183	0.00699809		-0.1452	-0.0025105	-0.00342277	-0.00432227	-0.0206754	-0.0125767	-0.00494164		-0.1452	-0.00247684	-0.00140713	-0.00162775	-0.0123088	-0.0118858	-0.00431376
-0.145	0.000386055	0.000879361	0.00307756	0.00590908	0.008512	0.00607365		-0.145	0.000424792	0.00188193	0.00337429	0.0063174	0.00916731	0.00699687		-0.145	-0.00251017	-0.00342335	-0.00432189	-0.0206752	-0.0125621	-0.00493036		-0.145	-0.00247712	-0.00141858	-0.00162694	-0.0123039	-0.0118803	-0.00431498
-0.1448	0.000385839	0.000879734	0.00307715	0.00591	0.00852298	0.00608614		-0.1448	0.000424374	0.00187363	0.00337309	0.00631544	0.0091731	0.00699565		-0.1448	-0.00251039	-0.00342298	-0.00432229	-0.0206743	-0.0125511	-0.00491786		-0.1448	-0.00247754	-0.00142687	-0.00162814	-0.0123058	-0.0118745	-0.0043162
-0.1446	0.000385676	0.000879742	0.00307777	0.00591016	0.00853517	0.00609681		-0.1446	0.000424305	0.00186698	0.00337367	0.00631026	0.00918011	0.00699352		-0.1446	-0.00251055	-0.00342297	-0.00432167	-0.0206742	-0.012539	-0.0049072		-0.1446	-0.00247761	-0.00143352	-0.00162756	-0.012311	-0.0118675	-0.00431833
-0.1444	0.000385514	0.000880548	0.00307824	0.0059101	0.00854706	0.006109		-0.1444	0.000424235	0.00185828	0.00337357	0.00630676	0.00918926	0.00699016		-0.1444	-0.00251071	-0.00342217	-0.0043212	-0.0206742	-0.0125271	-0.004895		-0.1444	-0.00247768	-0.00144222	-0.00162766	-0.0123145	-0.0118583	-0.00432169
-0.1442	0.00038546	0.000881078	0.00307904	0.0059102	0.00855559	0.00612272		-0.1442	0.000423469	0.00184978	0.00337467	0.00631358	0.00919779	0.0069859		-0.1442	-0.00251077	-0.00342164	-0.0043204	-0.0206741	-0.0125185	-0.00488129		-0.1442	-0.00247844	-0.00145072	-0.00162657	-0.0123077	-0.0118498	-0.00432595
-0.144	0.00038573	0.000881155	0.00308088	0.00590992	0.00856626	0.006134		-0.144	0.000422982	0.00184548	0.00337566	0.00632719	0.00920694	0.0069798		-0.144	-0.0025105	-0.00342156	-0.00431856	-0.0206744	-0.0125079	-0.00487001		-0.144	-0.00247893	-0.00145503	-0.00162558	-0.0122941	-0.0118407	-0.00433205
-0.1438	0.00038573	0.000881644	0.0030826	0.00590845	0.00857479	0.00614344		-0.1438	0.000422704	0.00183817	0.00337764	0.00634806	0.00921578	0.00697645		-0.1438	-0.0025105	-0.00342107	-0.00431684	-0.0206759	-0.0124993	-0.00486056		-0.1438	-0.00247921	-0.00146234	-0.0016236	-0.0122732	-0.0118318	-0.0043354
-0.1436	0.00038573	0.000881435	0.00308511	0.00590929	0.0085815	0.00615442		-0.1436	0.000422634	0.00183046	0.00337924	0.00637154	0.0092237	0.00697005		-0.1436	-0.0025105	-0.00342128	-0.00431433	-0.020675	-0.0124926	-0.00484959		-0.1436	-0.00247928	-0.00147004	-0.00162199	-0.0122497	-0.0118239	-0.0043418
-0.1434	0.000385676	0.000881161	0.00308748	0.0059087	0.00858729	0.00616417		-0.1434	0.000422982	0.00182476	0.00338208	0.00639481	0.00923254	0.00696517		-0.1434	-0.00251055	-0.00342155	-0.00431197	-0.0206756	-0.0124868	-0.00483984		-0.1434	-0.00247893	-0.00147575	-0.00161916	-0.0122264	-0.0118151	-0.00434668
-0.1432	0.000385514	0.000880921	0.00309034	0.00590668	0.00859521	0.00617027		-0.1432	0.000423469	0.00181717	0.00338426	0.00641758	0.00924229	0.00696029		-0.1432	-0.00251071	-0.00342179	-0.0043091	-0.0206776	-0.0124789	-0.00483374		-0.1432	-0.00247844	-0.00148333	-0.00161697	-0.0122037	-0.0118053	-0.00435156
-0.143	0.000385622	0.000880933	0.00309429	0.00590612	0.00860131	0.00617362		-0.143	0.000423052	0.00181061	0.0033867	0.00643633	0.00925296	0.00695603		-0.143	-0.0025106	-0.00342178	-0.00430515	-0.0206782	-0.0124728	-0.00483039		-0.143	-0.00247886	-0.0014899	-0.00161453	-0.0121849	-0.0117946	-0.00435582
-0.1428	0.000385784	0.000880636	0.00309793	0.00590471	0.00860619	0.00617423		-0.1428	0.000422008	0.00180854	0.00338865	0.00645205	0.00926241	0.00695298		-0.1428	-0.00251044	-0.00342208	-0.00430151	-0.0206796	-0.0124679	-0.00482978		-0.1428	-0.0024799	-0.00149197	-0.00161259	-0.0121692	-0.0117852	-0.00435887
-0.1426	0.000386001	0.000881761	0.00310279	0.00590486	0.00860862	0.00617606		-0.1426	0.000420685	0.00180639	0.00339221	0.00646492	0.00926881	0.00695085		-0.1426	-0.00251022	-0.00342095	-0.00429666	-0.0206795	-0.0124655	-0.00482795		-0.1426	-0.00248123	-0.00149411	-0.00160902	-0.0121563	-0.0117788	-0.004361
-0.1424	0.000385947	0.000881498	0.00310811	0.00590231	0.00861228	0.0061791		-0.1424	0.000420058	0.00180346	0.003398	0.00647503	0.00927399	0.0069481		-0.1424	-0.00251028	-0.00342122	-0.00429133	-0.020682	-0.0124618	-0.0048249		-0.1424	-0.00248185	-0.00149705	-0.00160323	-0.0121462	-0.0117736	-0.00436375
-0.1422	0.000386055	0.00088051	0.00311366	0.00589941	0.00861259	0.00618337		-0.1422	0.000419919	0.00180115	0.00340472	0.00648113	0.00927734	0.00694444		-0.1422	-0.00251017	-0.00342221	-0.00428579	-0.0206849	-0.0124615	-0.00482063		-0.1422	-0.00248199	-0.00149936	-0.00159651	-0.0121401	-0.0117703	-0.0043674
-0.142	0.00038573	0.000879514	0.00311976	0.00589718	0.0086135	0.00619343		-0.142	0.000419641	0.00179827	0.00341034	0.00647923	0.0092807	0.0069414		-0.142	-0.0025105	-0.0034232	-0.00427968	-0.0206871	-0.0124606	-0.00481058		-0.142	-0.00248227	-0.00150223	-0.00159089	-0.012142	-0.0117669	-0.00437045
-0.1418	0.00038573	0.000879371	0.00312669	0.00589412	0.00861472	0.00620562		-0.1418	0.000419084	0.00179486	0.00341564	0.00646849	0.00928283	0.00693774		-0.1418	-0.0025105	-0.00342334	-0.00427276	-0.0206902	-0.0124594	-0.00479838		-0.1418	-0.00248283	-0.00150564	-0.00158559	-0.0121528	-0.0117648	-0.00437411
-0.1416	0.000385676	0.000879522	0.00313215	0.00589238	0.00861655	0.00622147		-0.1416	0.000418527	0.00178984	0.00342173	0.00645427	0.00928313	0.00693103		-0.1416	-0.00251055	-0.00342319	-0.00426729	-0.0206919	-0.0124576	-0.00478253		-0.1416	-0.00248338	-0.00151067	-0.00157951	-0.012167	-0.0117645	-0.00438082
-0.1414	0.000385784	0.000879614	0.00313877	0.00589036	0.0086196	0.00623702		-0.1414	0.000418666	0.00178635	0.00342703	0.00644449	0.00928405	0.00692341		-0.1414	-0.00251044	-0.0034231	-0.00426068	-0.020694	-0.0124545	-0.00476699		-0.1414	-0.00248324	-0.00151415	-0.0015742	-0.0121768	-0.0117636	-0.00438844
-0.1412	0.000385405	0.000879727	0.00314313	0.00588792	0.00862112	0.00625408		-0.1412	0.000419084	0.00178617	0.00343224	0.0064369	0.0092871	0.00691397		-0.1412	-0.00251082	-0.00342299	-0.00425631	-0.0206964	-0.012453	-0.00474992		-0.1412	-0.00248283	-0.00151434	-0.00156899	-0.0121844	-0.0117605	-0.00439788
-0.141	0.000385405	0.000879967	0.00314715	0.00588535	0.00862203	0.00627359		-0.141	0.000419084	0.00178681	0.00343611	0.0064224	0.0092935	0.0069033		-0.141	-0.00251082	-0.00342275	-0.00425229	-0.020699	-0.0124521	-0.00473041		-0.141	-0.00248283	-0.0015137	-0.00156512	-0.0121989	-0.0117541	-0.00440855
-0.1408	0.000385514	0.000880347	0.00315208	0.00588178	0.00862447	0.00629371		-0.1408	0.000418944	0.00178721	0.00343959	0.0064039	0.00930203	0.00689141		-0.1408	-0.00251071	-0.00342237	-0.00424737	-0.0207025	-0.0124496	-0.0047103		-0.1408	-0.00248297	-0.0015133	-0.00156164	-0.0122174	-0.0117456	-0.00442044
-0.1406	0.000385405	0.000880755	0.00315548	0.00587907	0.0086263	0.00630895		-0.1406	0.000418596	0.0017885	0.00344225	0.00638799	0.00930874	0.006878		-0.1406	-0.00251082	-0.00342196	-0.00424396	-0.0207053	-0.0124478	-0.00469506		-0.1406	-0.00248331	-0.00151201	-0.00155899	-0.0122333	-0.0117389	-0.00443385
-0.1404	0.000384972	0.000881249	0.00315896	0.00587601	0.00862844	0.00631962		-0.1404	0.000418318	0.00178892	0.00344382	0.00637775	0.00930904	0.0068655		-0.1404	-0.00251125	-0.00342147	-0.00424048	-0.0207083	-0.0124457	-0.00468439		-0.1404	-0.00248359	-0.00151159	-0.00155741	-0.0122435	-0.0117386	-0.00444635
-0.1402	0.000385081	0.000881022	0.00316202	0.00587342	0.00863026	0.00633485		-0.1402	0.000418248	0.00178597	0.00344329	0.00637082	0.00930478	0.00685301		-0.1402	-0.00251115	-0.00342169	-0.00423742	-0.0207109	-0.0124439	-0.00466915		-0.1402	-0.00248366	-0.00151453	-0.00155794	-0.0122504	-0.0117428	-0.00445884
-0.14	0.000385297	0.000880479	0.00316312	0.00587063	0.00863057	0.00635253		-0.14	0.000418388	0.00178499	0.00344319	0.00636725	0.00929959	0.0068402		-0.14	-0.00251093	-0.00342224	-0.00423632	-0.0207137	-0.0124436	-0.00465147		-0.14	-0.00248352	-0.00151551	-0.00155804	-0.012254	-0.011748	-0.00447164
-0.1398	0.000385351	0.000880149	0.00316579	0.00586818	0.00862965	0.00637082		-0.1398	0.000418248	0.00178507	0.00344214	0.00636654	0.00929685	0.00683106		-0.1398	-0.00251087	-0.00342257	-0.00423366	-0.0207161	-0.0124445	-0.00463319		-0.1398	-0.00248366	-0.00151543	-0.0015591	-0.0122547	-0.0117508	-0.00448079
-0.1396	0.000385405	0.000880031	0.00316787	0.00586536	0.00863026	0.00638758		-0.1396	0.000417831	0.00178616	0.00344226	0.0063672	0.00929594	0.00682161		-0.1396	-0.00251082	-0.00342268	-0.00423157	-0.020719	-0.0124439	-0.00461642		-0.1396	-0.00248408	-0.00151435	-0.00155897	-0.0122541	-0.0117517	-0.00449024
-0.1394	0.000385189	0.000879831	0.00316994	0.00586224	0.00862935	0.00640343		-0.1394	0.000417761	0.00178785	0.00344161	0.00636958	0.00929411	0.00681064		-0.1394	-0.00251104	-0.00342288	-0.0042295	-0.0207221	-0.0124448	-0.00460057		-0.1394	-0.00248415	-0.00151266	-0.00155962	-0.0122517	-0.0117535	-0.00450121
-0.1392	0.000385297	0.000879293	0.00317399	0.00586189	0.00862905	0.00641288		-0.1392	0.000417691	0.00178936	0.0034422	0.00637349	0.00929289	0.00679997		-0.1392	-0.00251093	-0.00342342	-0.00422545	-0.0207224	-0.0124451	-0.00459112		-0.1392	-0.00248422	-0.00151115	-0.00155904	-0.0122478	-0.0117547	-0.00451188
-0.139	0.000385514	0.000878835	0.00317865	0.0058638	0.00862996	0.00641563		-0.139	0.00041797	0.00178705	0.00344304	0.00637529	0.0092938	0.00678869		-0.139	-0.00251071	-0.00342388	-0.0042208	-0.0207205	-0.0124442	-0.00458838		-0.139	-0.00248394	-0.00151346	-0.00155819	-0.012246	-0.0117538	-0.00452315
-0.1388	0.000385135	0.000878794	0.00318311	0.00586561	0.00862935	0.00641502		-0.1388	0.00041797	0.00178118	0.00344582	0.00637616	0.00929716	0.0067762		-0.1388	-0.00251109	-0.00342392	-0.00421633	-0.0207187	-0.0124448	-0.00458899		-0.1388	-0.00248394	-0.00151932	-0.00155541	-0.0122451	-0.0117504	-0.00453565
-0.1386	0.000385081	0.000878872	0.00318942	0.00586567	0.00862844	0.00641624		-0.1386	0.000417413	0.00177541	0.00344686	0.00637617	0.00930142	0.00676401		-0.1386	-0.00251115	-0.00342384	-0.00421002	-0.0207186	-0.0124457	-0.00458777		-0.1386	-0.0024845	-0.0015251	-0.00155438	-0.0122451	-0.0117462	-0.00454784
-0.1384	0.000384864	0.000878759	0.00319603	0.00586517	0.00862905	0.00642081		-0.1384	0.000417204	0.0017723	0.00344954	0.00637556	0.00930996	0.00675273		-0.1384	-0.00251136	-0.00342396	-0.00420341	-0.0207192	-0.0124451	-0.0045832		-0.1384	-0.00248471	-0.0015282	-0.00155169	-0.0122457	-0.0117376	-0.00455912
-0.1382	0.000384972	0.000878575	0.00320441	0.0058654	0.00862874	0.00642873		-0.1382	0.000417134	0.0017721	0.0034542	0.00637458	0.00932062	0.00674358		-0.1382	-0.00251125	-0.00342414	-0.00419503	-0.0207189	-0.0124454	-0.00457527		-0.1382	-0.00248478	-0.00152841	-0.00154704	-0.0122467	-0.011727	-0.00456826
-0.138	0.000384918	0.00087882	0.00321312	0.00586577	0.00862844	0.00643879		-0.138	0.000416786	0.00177132	0.00345688	0.0063746	0.00933312	0.00673596		-0.138	-0.00251131	-0.0034239	-0.00418632	-0.0207185	-0.0124457	-0.00456522		-0.138	-0.00248512	-0.00152919	-0.00154435	-0.0122467	-0.0117145	-0.00457588
-0.1378	0.000384972	0.000879977	0.00322006	0.00586651	0.00862691	0.00644885		-0.1378	0.000416508	0.00176559	0.00345933	0.00637338	0.00934653	0.0067253		-0.1378	-0.00251125	-0.00342274	-0.00417938	-0.0207178	-0.0124472	-0.00455516		-0.1378	-0.0024854	-0.00153492	-0.0015419	-0.0122479	-0.0117011	-0.00458655
-0.1376	0.000385243	0.000881434	0.00322716	0.00586667	0.00862508	0.00646043		-0.1376	0.000416299	0.00175627	0.00346047	0.0063726	0.00936055	0.0067125		-0.1376	-0.00251098	-0.00342128	-0.00417228	-0.0207177	-0.012449	-0.00454358		-0.1376	-0.00248561	-0.00154424	-0.00154077	-0.0122487	-0.0116871	-0.00459935
-0.1374	0.000385189	0.00088351	0.00323514	0.00586741	0.00862325	0.00647171		-0.1374	0.000416369	0.00174314	0.00346194	0.00637208	0.00937396	0.00669787		-0.1374	-0.00251104	-0.00341921	-0.00416431	-0.0207169	-0.0124509	-0.0045323		-0.1374	-0.00248554	-0.00155737	-0.00153929	-0.0122492	-0.0116736	-0.00461398
-0.1372	0.000385081	0.00088542	0.00324299	0.00586557	0.00862051	0.00648177		-0.1372	0.000415881	0.00173206	0.00346456	0.00637014	0.00938463	0.00668263		-0.1372	-0.00251115	-0.0034173	-0.00415645	-0.0207187	-0.0124536	-0.00452224		-0.1372	-0.00248603	-0.00156845	-0.00153668	-0.0122511	-0.011663	-0.00462922
-0.137	0.000385297	0.000887308	0.00325044	0.0058646	0.00861746	0.00649152		-0.137	0.000415046	0.00172656	0.00346728	0.00636851	0.00939256	0.00666769		-0.137	-0.00251093	-0.00341541	-0.004149	-0.0207197	-0.0124567	-0.00451249		-0.137	-0.00248686	-0.00157395	-0.00153396	-0.0122527	-0.011655	-0.00464416
-0.1368	0.000385351	0.000888212	0.00325849	0.00586463	0.00861381	0.00649975		-0.1368	0.000414071	0.0017277	0.00347025	0.00636739	0.00939865	0.00665245		-0.1368	-0.00251087	-0.0034145	-0.00414095	-0.0207197	-0.0124603	-0.00450426		-0.1368	-0.00248784	-0.00157281	-0.00153099	-0.0122539	-0.011649	-0.0046594
-0.1366	0.000385893	0.000888396	0.00326479	0.0058653	0.00860954	0.00650188		-0.1366	0.000413375	0.00173018	0.00347229	0.006362	0.00940505	0.00663752		-0.1366	-0.00251033	-0.00341432	-0.00413465	-0.020719	-0.0124646	-0.00450212		-0.1366	-0.00248854	-0.00157033	-0.00152895	-0.0122593	-0.0116426	-0.00467433
-0.1364	0.000385839	0.000888459	0.00327132	0.00586681	0.00860466	0.00650767		-0.1364	0.000413236	0.00172853	0.0034733	0.00635685	0.00940932	0.00662258		-0.1364	-0.00251039	-0.00341426	-0.00412813	-0.0207175	-0.0124695	-0.00449633		-0.1364	-0.00248867	-0.00157197	-0.00152793	-0.0122644	-0.0116383	-0.00468927
-0.1362	0.000386218	0.00088824	0.00327609	0.0058687	0.00859826	0.00651529		-0.1362	0.000413445	0.001722	0.00347651	0.00635074	0.00941145	0.00660551		-0.1362	-0.00251001	-0.00341448	-0.00412335	-0.0207156	-0.0124759	-0.00448871		-0.1362	-0.00248847	-0.0015785	-0.00152472	-0.0122705	-0.0116362	-0.00470634
-0.136	0.000386326	0.000887696	0.0032821	0.00587005	0.00859369	0.00652261		-0.136	0.000413654	0.00171861	0.00347656	0.00634395	0.00941206	0.00659119		-0.136	-0.0025099	-0.00341502	-0.00411734	-0.0207143	-0.0124804	-0.0044814		-0.136	-0.00248826	-0.0015819	-0.00152468	-0.0122773	-0.0116355	-0.00472066
-0.1358	0.000386218	0.000887684	0.00328593	0.00587006	0.0085879	0.00653145		-0.1358	0.000413514	0.00171551	0.003477	0.00633714	0.00941176	0.00658418		-0.1358	-0.00251001	-0.00341503	-0.00411351	-0.0207143	-0.0124862	-0.00447256		-0.1358	-0.0024884	-0.001585	-0.00152424	-0.0122841	-0.0116358	-0.00472767
-0.1356	0.000386109	0.000887285	0.00329062	0.00587048	0.00858119	0.00653724		-0.1356	0.000412958	0.001711	0.00347704	0.00632875	0.00940871	0.00657442		-0.1356	-0.00251012	-0.00341543	-0.00410882	-0.0207138	-0.0124929	-0.00446677		-0.1356	-0.00248895	-0.00158951	-0.00152419	-0.0122925	-0.0116389	-0.00473743
-0.1354	0.00038573	0.000887816	0.00329471	0.00587139	0.00857449	0.00654029		-0.1354	0.000411565	0.00170734	0.00347647	0.00632151	0.00940536	0.00656162		-0.1354	-0.0025105	-0.0034149	-0.00410473	-0.0207129	-0.0124996	-0.00446372		-0.1354	-0.00249035	-0.00159317	-0.00152476	-0.0122997	-0.0116422	-0.00475023
-0.1352	0.000385243	0.000887391	0.00329737	0.00587033	0.00856778	0.00653907		-0.1352	0.000410521	0.00170521	0.00347514	0.00631337	0.00939865	0.00655126		-0.1352	-0.00251098	-0.00341532	-0.00410208	-0.020714	-0.0125063	-0.00446494		-0.1352	-0.00249139	-0.0015953	-0.00152609	-0.0123079	-0.011649	-0.00476059
-0.135	0.000385243	0.000887636	0.00329957	0.00587015	0.0085623	0.00653754		-0.135	0.000410521	0.00170213	0.00347457	0.00630352	0.00939317	0.00653815		-0.135	-0.00251098	-0.00341508	-0.00409987	-0.0207142	-0.0125118	-0.00446646		-0.135	-0.00249139	-0.00159837	-0.00152667	-0.0123177	-0.0116544	-0.0047737
-0.1348	0.000385351	0.000888295	0.00330008	0.00586878	0.00855742	0.00653785		-0.1348	0.000410312	0.00170219	0.00347417	0.00629367	0.00938829	0.00652444		-0.1348	-0.00251087	-0.00341442	-0.00409936	-0.0207155	-0.0125167	-0.00446616		-0.1348	-0.0024916	-0.00159831	-0.00152707	-0.0123276	-0.0116593	-0.00478741
-0.1346	0.00038573	0.000888982	0.00330163	0.00586561	0.00855041	0.0065412		-0.1346	0.000409686	0.00170086	0.00347409	0.00628232	0.00938128	0.00651164		-0.1346	-0.0025105	-0.00341373	-0.00409781	-0.0207187	-0.0125237	-0.00446281		-0.1346	-0.00249223	-0.00159965	-0.00152715	-0.0123389	-0.0116663	-0.00480021
-0.1344	0.000385893	0.000890557	0.00330364	0.00586074	0.00854279	0.00654547		-0.1344	0.000409129	0.00169754	0.00347549	0.00627133	0.00937153	0.00649914		-0.1344	-0.00251033	-0.00341216	-0.0040958	-0.0207236	-0.0125313	-0.00445854		-0.1344	-0.00249278	-0.00160297	-0.00152575	-0.0123499	-0.0116761	-0.00481271
-0.1342	0.000386218	0.000893013	0.00330497	0.00585537	0.00853517	0.00655034		-0.1342	0.000409268	0.00169656	0.00347698	0.00625874	0.00936147	0.00648939		-0.1342	-0.00251001	-0.0034097	-0.00409447	-0.020729	-0.012539	-0.00445366		-0.1342	-0.00249264	-0.00160394	-0.00152426	-0.0123625	-0.0116861	-0.00482246
-0.134	0.00038638	0.000894902	0.00330679	0.00584971	0.00852694	0.00655583		-0.134	0.000409338	0.00170349	0.00347835	0.0062469	0.00935507	0.00647963		-0.134	-0.00250985	-0.00340781	-0.00409265	-0.0207346	-0.0125472	-0.00444818		-0.134	-0.00249257	-0.00159701	-0.00152288	-0.0123744	-0.0116925	-0.00483222
-0.1338	0.000386597	0.000895923	0.00330783	0.00584509	0.00852206	0.00655827		-0.1338	0.000409198	0.00171013	0.00347776	0.00623648	0.0093511	0.00646744		-0.1338	-0.00250963	-0.00340679	-0.00409162	-0.0207392	-0.0125521	-0.00444574		-0.1338	-0.00249271	-0.00159038	-0.00152347	-0.0123848	-0.0116965	-0.00484441
-0.1336	0.000386542	0.000897257	0.00330961	0.00583706	0.00851688	0.00656193		-0.1336	0.000408989	0.00171312	0.00347807	0.0062307	0.00934745	0.00645464		-0.1336	-0.00250968	-0.00340546	-0.00408983	-0.0207473	-0.0125572	-0.00444208		-0.1336	-0.00249292	-0.00158739	-0.00152316	-0.0123906	-0.0117002	-0.00485721
-0.1334	0.000387084	0.000896573	0.00331108	0.00582861	0.00851018	0.00656711		-0.1334	0.000408641	0.00171475	0.00347785	0.00622603	0.00934196	0.00644245		-0.1334	-0.00250914	-0.00340614	-0.00408837	-0.0207557	-0.0125639	-0.0044369		-0.1334	-0.00249327	-0.00158576	-0.00152339	-0.0123952	-0.0117056	-0.0048694
-0.1332	0.000386651	0.000892117	0.00331398	0.00582085	0.00850438	0.00656985		-0.1332	0.00040892	0.0017152	0.0034794	0.00621974	0.00933068	0.00643239		-0.1332	-0.00250958	-0.0034106	-0.00408546	-0.0207635	-0.0125697	-0.00443415		-0.1332	-0.00249299	-0.00158531	-0.00152183	-0.0124015	-0.0117169	-0.00487946
-0.133	0.000386597	0.000889262	0.00331738	0.00581259	0.00849981	0.00657046		-0.133	0.000408989	0.00171248	0.00348157	0.00621218	0.00931514	0.00642751		-0.133	-0.00250963	-0.00341345	-0.00408206	-0.0207717	-0.0125743	-0.00443354		-0.133	-0.00249292	-0.00158803	-0.00151967	-0.0124091	-0.0117325	-0.00488434
-0.1328	0.000386867	0.00088763	0.00332173	0.00580408	0.00849585	0.00657046		-0.1328	0.000409268	0.00170879	0.00348536	0.0062069	0.00930234	0.00641928		-0.1328	-0.00250936	-0.00341509	-0.00407771	-0.0207802	-0.0125783	-0.00443354		-0.1328	-0.00249264	-0.00159172	-0.00151588	-0.0124144	-0.0117453	-0.00489257
-0.1326	0.000387084	0.000883499	0.00332633	0.00579884	0.00849219	0.00657077		-0.1326	0.000408989	0.00170606	0.00348795	0.00620016	0.00929136	0.00640648		-0.1326	-0.00250914	-0.00341922	-0.00407311	-0.0207855	-0.0125819	-0.00443324		-0.1326	-0.00249292	-0.00159445	-0.00151329	-0.0124211	-0.0117562	-0.00490537
-0.1324	0.000387084	0.0008795	0.00333277	0.00579616	0.00849006	0.00657077		-0.1324	0.000409059	0.00170521	0.00349004	0.00618905	0.00928374	0.00639094		-0.1324	-0.00250914	-0.00342322	-0.00406667	-0.0207882	-0.0125841	-0.00443324		-0.1324	-0.00249285	-0.0015953	-0.0015112	-0.0124322	-0.0117639	-0.00492091
-0.1322	0.000387246	0.00087474	0.00333883	0.00579697	0.00848823	0.00657259		-0.1322	0.000408641	0.00170779	0.00349222	0.00617704	0.00927917	0.00637722		-0.1322	-0.00250898	-0.00342798	-0.00406062	-0.0207874	-0.0125859	-0.00443141		-0.1322	-0.00249327	-0.00159272	-0.00150902	-0.0124442	-0.0117684	-0.00493463
-0.132	0.0003873	0.000870682	0.00334359	0.0057973	0.00848762	0.0065732		-0.132	0.000408224	0.00170911	0.00349387	0.00616415	0.00927491	0.00636381		-0.132	-0.00250893	-0.00343203	-0.00405586	-0.020787	-0.0125865	-0.0044308		-0.132	-0.00249369	-0.0015914	-0.00150737	-0.0124571	-0.0117727	-0.00494804
-0.1318	0.0003873	0.000868291	0.0033504	0.00579749	0.00848701	0.00657199		-0.1318	0.000407876	0.00171014	0.0034925	0.00614949	0.0092685	0.00635192		-0.1318	-0.00250893	-0.00343442	-0.00404904	-0.0207868	-0.0125871	-0.00443202		-0.1318	-0.00249404	-0.00159037	-0.00150874	-0.0124718	-0.0117791	-0.00495993
-0.1316	0.00038703	0.000867948	0.00335721	0.00579357	0.00848732	0.00657229		-0.1316	0.000407528	0.0017121	0.003492	0.00613559	0.00926058	0.00634278		-0.1316	-0.0025092	-0.00343477	-0.00404224	-0.0207907	-0.0125868	-0.00443172		-0.1316	-0.00249438	-0.0015884	-0.00150923	-0.0124857	-0.011787	-0.00496907
-0.1314	0.00038703	0.000867476	0.00336516	0.00578988	0.00848457	0.00656863		-0.1314	0.000407319	0.0017115	0.00349143	0.00612162	0.00925326	0.0063376		-0.1314	-0.0025092	-0.00343524	-0.00403428	-0.0207944	-0.0125895	-0.00443537		-0.1314	-0.00249459	-0.00158901	-0.00150981	-0.0124996	-0.0117943	-0.00497425
-0.1312	0.00038703	0.000866748	0.00337256	0.00578484	0.00848305	0.00656711		-0.1312	0.000407528	0.00170892	0.00349232	0.00610729	0.00924565	0.00633425		-0.1312	-0.0025092	-0.00343597	-0.00402688	-0.0207995	-0.0125911	-0.0044369		-0.1312	-0.00249438	-0.00159159	-0.00150891	-0.012514	-0.011802	-0.0049776
-0.131	0.000386921	0.000866067	0.0033793	0.00578095	0.00848	0.0065665		-0.131	0.000407458	0.00170493	0.00349215	0.00609556	0.00923863	0.00633272		-0.131	-0.0025093	-0.00343665	-0.00402015	-0.0208034	-0.0125941	-0.00443751		-0.131	-0.00249445	-0.00159558	-0.00150909	-0.0125257	-0.011809	-0.00497913
-0.1308	0.000386651	0.0008639	0.00338558	0.0057761	0.00847726	0.00656619		-0.1308	0.000407458	0.00170074	0.00349077	0.00608568	0.00922858	0.00633211		-0.1308	-0.00250958	-0.00343882	-0.00401386	-0.0208082	-0.0125969	-0.00443781		-0.1308	-0.00249445	-0.00159977	-0.00151046	-0.0125356	-0.011819	-0.00497974
-0.1306	0.000386651	0.00086273	0.00339163	0.0057732	0.0084733	0.00656558		-0.1306	0.000407528	0.00169704	0.00348985	0.0060796	0.00921791	0.00632937		-0.1306	-0.00250958	-0.00343999	-0.00400781	-0.0208111	-0.0126008	-0.00443842		-0.1306	-0.00249438	-0.00160347	-0.00151139	-0.0125417	-0.0118297	-0.00498248
-0.1304	0.000386867	0.00086267	0.00339682	0.00577005	0.00846903	0.00656376		-0.1304	0.000407876	0.00169186	0.0034853	0.00607795	0.00920267	0.00632571		-0.1304	-0.00250936	-0.00344005	-0.00400262	-0.0208143	-0.0126051	-0.00444025		-0.1304	-0.00249404	-0.00160865	-0.00151593	-0.0125433	-0.0118449	-0.00498614
-0.1302	0.000386705	0.000862471	0.00340209	0.00576644	0.00846263	0.00656406		-0.1302	0.000407876	0.00168691	0.00348355	0.00607885	0.00918926	0.00632175		-0.1302	-0.00250952	-0.00344024	-0.00399735	-0.0208179	-0.0126115	-0.00443995		-0.1302	-0.00249404	-0.0016136	-0.00151769	-0.0125424	-0.0118583	-0.0049901
-0.13	0.000386488	0.000861358	0.0034058	0.00576421	0.00845531	0.00656345		-0.13	0.000408084	0.00168353	0.00348106	0.00607792	0.00917036	0.0063187		-0.13	-0.00250974	-0.00344136	-0.00399364	-0.0208201	-0.0126188	-0.00444056		-0.13	-0.00249383	-0.00161698	-0.00152017	-0.0125433	-0.0118772	-0.00499315
-0.1298	0.000386813	0.000860284	0.00340982	0.00576311	0.00844617	0.00656284		-0.1298	0.000407945	0.0016817	0.00347936	0.0060736	0.00915299	0.00631565		-0.1298	-0.00250941	-0.00344243	-0.00398962	-0.0208212	-0.012628	-0.00444116		-0.1298	-0.00249397	-0.0016188	-0.00152187	-0.0125477	-0.0118946	-0.0049962
-0.1296	0.000386867	0.000859746	0.00341296	0.00576492	0.00843642	0.0065604		-0.1296	0.000407876	0.0016787	0.0034808	0.00606664	0.0091347	0.00631169		-0.1296	-0.00250936	-0.00344297	-0.00398649	-0.0208194	-0.0126377	-0.0044436		-0.1296	-0.00249404	-0.0016218	-0.00152044	-0.0125546	-0.0119129	-0.00500016
-0.1294	0.000387246	0.000859169	0.00341595	0.00576643	0.00842605	0.00655827		-0.1294	0.000407179	0.00167395	0.0034775	0.00606338	0.0091158	0.00630681		-0.1294	-0.00250898	-0.00344355	-0.00398349	-0.0208179	-0.0126481	-0.00444574		-0.1294	-0.00249473	-0.00162656	-0.00152374	-0.0125579	-0.0119318	-0.00500504
-0.1292	0.000387625	0.000859113	0.00341892	0.00577041	0.00841508	0.00655644		-0.1292	0.000406692	0.00167197	0.00347742	0.00606189	0.00909843	0.00630407		-0.1292	-0.0025086	-0.0034436	-0.00398053	-0.0208139	-0.012659	-0.00444757		-0.1292	-0.00249522	-0.00162854	-0.00152382	-0.0125594	-0.0119492	-0.00500778
-0.129	0.000387625	0.00085819	0.00342113	0.00577475	0.00840228	0.00655553		-0.129	0.000406692	0.00166707	0.00347771	0.0060632	0.00908106	0.00630011		-0.129	-0.0025086	-0.00344453	-0.00397831	-0.0208096	-0.0126718	-0.00444848		-0.129	-0.00249522	-0.00163344	-0.00152352	-0.0125581	-0.0119665	-0.00501174
-0.1288	0.00038768	0.000856936	0.00342377	0.00578125	0.00838978	0.00655553		-0.1288	0.000406762	0.00166248	0.00347869	0.00606377	0.00906582	0.00629767		-0.1288	-0.00250855	-0.00344578	-0.00397568	-0.0208031	-0.0126843	-0.00444848		-0.1288	-0.00249515	-0.00163802	-0.00152254	-0.0125575	-0.0119818	-0.00501418
-0.1286	0.000388004	0.000854692	0.00342628	0.00578674	0.00837576	0.00655736		-0.1286	0.00040704	0.00165827	0.00347926	0.0060654	0.00904936	0.00629676		-0.1286	-0.00250822	-0.00344802	-0.00397316	-0.0207976	-0.0126984	-0.00444665		-0.1286	-0.00249487	-0.00164224	-0.00152198	-0.0125559	-0.0119982	-0.00501509
-0.1284	0.000388546	0.000852418	0.00342907	0.00579398	0.00836174	0.00655796		-0.1284	0.000406831	0.00165079	0.00347973	0.00606638	0.00903137	0.00629645		-0.1284	-0.00250768	-0.0034503	-0.00397038	-0.0207903	-0.0127124	-0.00444604		-0.1284	-0.00249508	-0.00164972	-0.00152151	-0.0125549	-0.0120162	-0.0050154
-0.1282	0.000388762	0.000850911	0.00343311	0.00580289	0.00834985	0.00655918		-0.1282	0.000406762	0.00164382	0.00347734	0.00606836	0.00901674	0.00629493		-0.1282	-0.00250746	-0.0034518	-0.00396633	-0.0207814	-0.0127243	-0.00444482		-0.1282	-0.00249515	-0.00165669	-0.00152389	-0.0125529	-0.0120309	-0.00501692
-0.128	0.000388708	0.000849807	0.00343688	0.0058104	0.00833827	0.00656132		-0.128	0.00040704	0.00163844	0.00347791	0.00606948	0.00900303	0.00629127		-0.128	-0.00250752	-0.00345291	-0.00396257	-0.0207739	-0.0127359	-0.00444269		-0.128	-0.00249487	-0.00166206	-0.00152332	-0.0125518	-0.0120446	-0.00502058
-0.1278	0.000388167	0.000848406	0.00344015	0.00581398	0.0083276	0.00656376		-0.1278	0.00040711	0.00163486	0.00347781	0.00607051	0.00899084	0.00628944		-0.1278	-0.00250806	-0.00345431	-0.00395929	-0.0207703	-0.0127465	-0.00444025		-0.1278	-0.0024948	-0.00166565	-0.00152342	-0.0125507	-0.0120568	-0.00502241
-0.1276	0.000388167	0.000847654	0.00344277	0.00581377	0.00831785	0.00656437		-0.1276	0.000407249	0.00163183	0.00347634	0.00607032	0.00897895	0.00628456		-0.1276	-0.00250806	-0.00345506	-0.00395667	-0.0207705	-0.0127563	-0.00443964		-0.1276	-0.00249466	-0.00166868	-0.0015249	-0.0125509	-0.0120687	-0.00502729
-0.1274	0.000388059	0.000847256	0.00344687	0.0058152	0.00831023	0.00656437		-0.1274	0.000407319	0.00162996	0.00347418	0.00607044	0.0089695	0.0062806		-0.1274	-0.00250817	-0.00345546	-0.00395257	-0.0207691	-0.0127639	-0.00443964		-0.1274	-0.00249459	-0.00167054	-0.00152706	-0.0125508	-0.0120781	-0.00503125
-0.1272	0.000388221	0.000846881	0.0034512	0.00582091	0.00830383	0.00656254		-0.1272	0.000407249	0.00162619	0.0034732	0.00606971	0.00895883	0.00627664		-0.1272	-0.002508	-0.00345583	-0.00394825	-0.0207634	-0.0127703	-0.00444147		-0.1272	-0.00249466	-0.00167432	-0.00152803	-0.0125515	-0.0120888	-0.00503521
-0.127	0.000388221	0.000846313	0.00345464	0.0058283	0.00829712	0.00655979		-0.127	0.00040704	0.00162227	0.00347223	0.00606847	0.00894999	0.00627207		-0.127	-0.002508	-0.0034564	-0.0039448	-0.020756	-0.012777	-0.00444421		-0.127	-0.00249487	-0.00167824	-0.001529	-0.0125528	-0.0120976	-0.00503978
-0.1268	0.000388275	0.000845324	0.00345967	0.0058363	0.00828889	0.00655705		-0.1268	0.00040718	0.00161591	0.00347249	0.0060665	0.00894359	0.00627146		-0.1268	-0.00250795	-0.00345739	-0.00393977	-0.020748	-0.0127852	-0.00444696		-0.1268	-0.00249473	-0.0016846	-0.00152875	-0.0125548	-0.012104	-0.00504039
-0.1266	0.000388383	0.000844625	0.00346401	0.00584473	0.00827975	0.00655126		-0.1266	0.000406831	0.00161085	0.00347082	0.00606478	0.0089375	0.00627085		-0.1266	-0.00250784	-0.00345809	-0.00393543	-0.0207396	-0.0127944	-0.00445275		-0.1266	-0.00249508	-0.00168965	-0.00153042	-0.0125565	-0.0121101	-0.005041
-0.1264	0.000388546	0.000843941	0.00346728	0.00585379	0.00826817	0.00654486		-0.1264	0.000406623	0.00160308	0.00347084	0.0060619	0.00892652	0.00627146		-0.1264	-0.00250768	-0.00345877	-0.00393217	-0.0207305	-0.012806	-0.00445915		-0.1264	-0.00249529	-0.00169743	-0.00153039	-0.0125594	-0.0121211	-0.00504039
-0.1262	0.000388113	0.000843197	0.0034714	0.00586179	0.00825384	0.00653785		-0.1262	0.000406623	0.0015973	0.00347068	0.00605951	0.00891403	0.0062739		-0.1262	-0.00250811	-0.00345952	-0.00392804	-0.0207225	-0.0128203	-0.00446616		-0.1262	-0.00249529	-0.00170321	-0.00153056	-0.0125617	-0.0121336	-0.00503795
-0.126	0.000388383	0.000842159	0.00347304	0.00586896	0.00824439	0.00653084		-0.126	0.000406971	0.00158908	0.00347065	0.00605627	0.0088997	0.00627816		-0.126	-0.00250784	-0.00346056	-0.0039264	-0.0207154	-0.0128297	-0.00447317		-0.126	-0.00249494	-0.00171142	-0.00153059	-0.012565	-0.0121479	-0.00503369
-0.1258	0.000388762	0.000840864	0.0034757	0.00587523	0.00824043	0.00652474		-0.1258	0.000406901	0.00157843	0.00347032	0.00605225	0.00888355	0.00628182		-0.1258	-0.00250746	-0.00346185	-0.00392374	-0.0207091	-0.0128337	-0.00447926		-0.1258	-0.00249501	-0.00172208	-0.00153091	-0.012569	-0.0121641	-0.00503003
-0.1256	0.000389358	0.000839699	0.00347778	0.00588162	0.00824043	0.00652047		-0.1256	0.000407319	0.00156894	0.0034696	0.00604738	0.00886618	0.00628578		-0.1256	-0.00250687	-0.00346302	-0.00392166	-0.0207027	-0.0128337	-0.00448353		-0.1256	-0.00249459	-0.00173157	-0.00153163	-0.0125739	-0.0121814	-0.00502607
-0.1254	0.000389466	0.000838852	0.00347893	0.00588614	0.00824135	0.00651438		-0.1254	0.00040711	0.00156325	0.00346938	0.0060436	0.00884819	0.00628914		-0.1254	-0.00250676	-0.00346386	-0.00392051	-0.0206982	-0.0128328	-0.00448963		-0.1254	-0.0024948	-0.00173726	-0.00153185	-0.0125777	-0.0121994	-0.00502271
-0.1252	0.000389358	0.00083851	0.00348126	0.00588941	0.00824074	0.0065092		-0.1252	0.00040704	0.00156111	0.00346898	0.00604201	0.00883082	0.0062931		-0.1252	-0.00250687	-0.00346421	-0.00391818	-0.0206949	-0.0128334	-0.00449481		-0.1252	-0.00249487	-0.0017394	-0.00153225	-0.0125792	-0.0122168	-0.00501875
-0.125	0.000389466	0.000838257	0.00348338	0.00589092	0.00824074	0.00650341		-0.125	0.000407597	0.00155921	0.00347121	0.00604568	0.00881223	0.00629676		-0.125	-0.00250676	-0.00346446	-0.00391607	-0.0206934	-0.0128334	-0.0045006		-0.125	-0.00249431	-0.0017413	-0.00153003	-0.0125756	-0.0122354	-0.00501509
-0.1248	0.000388979	0.000837291	0.0034852	0.00589231	0.00824074	0.00649883		-0.1248	0.000407597	0.00155803	0.00347234	0.0060517	0.00879089	0.00629919		-0.1248	-0.00250725	-0.00346542	-0.00391424	-0.020692	-0.0128334	-0.00450517		-0.1248	-0.00249431	-0.00174248	-0.0015289	-0.0125696	-0.0122567	-0.00501266
-0.1246	0.0003886	0.000836191	0.00348624	0.0058921	0.00824165	0.00649365		-0.1246	0.000407667	0.0015576	0.00347504	0.00605369	0.00876651	0.00630163		-0.1246	-0.00250763	-0.00346652	-0.0039132	-0.0206922	-0.0128325	-0.00451035		-0.1246	-0.00249424	-0.00174291	-0.00152619	-0.0125676	-0.0122811	-0.00501022
-0.1244	0.000388492	0.000834882	0.00348731	0.00589079	0.00824135	0.00648847		-0.1244	0.000407806	0.00155643	0.00347563	0.00605379	0.00874395	0.00630559		-0.1244	-0.00250773	-0.00346783	-0.00391213	-0.0206935	-0.0128328	-0.00451553		-0.1244	-0.0024941	-0.00174408	-0.0015256	-0.0125675	-0.0123037	-0.00500625
-0.1242	0.000388817	0.000834026	0.00348779	0.00588955	0.00823952	0.00648451		-0.1242	0.000407528	0.00155461	0.00347723	0.00605462	0.00872231	0.00630986		-0.1242	-0.00250741	-0.00346869	-0.00391165	-0.0206948	-0.0128346	-0.0045195		-0.1242	-0.00249438	-0.00174589	-0.00152401	-0.0125666	-0.0123253	-0.00500199
-0.124	0.000388708	0.000833172	0.00348731	0.00588827	0.00823556	0.00648207		-0.124	0.000407179	0.00154895	0.00347861	0.00605857	0.00870159	0.00631443		-0.124	-0.00250752	-0.00346954	-0.00391213	-0.020696	-0.0128386	-0.00452194		-0.124	-0.00249473	-0.00175155	-0.00152263	-0.0125627	-0.012346	-0.00499742
-0.1238	0.000388925	0.000832295	0.00348792	0.00588738	0.00822915	0.00648207		-0.1238	0.00040704	0.00153858	0.00347852	0.00606337	0.0086833	0.00631809		-0.1238	-0.0025073	-0.00347042	-0.00391152	-0.0206969	-0.012845	-0.00452194		-0.1238	-0.00249487	-0.00176193	-0.00152272	-0.0125579	-0.0123643	-0.00499376
-0.1236	0.000388979	0.000832559	0.00348867	0.00588686	0.00822032	0.00648055		-0.1236	0.000406692	0.00153048	0.00347687	0.00606908	0.00866532	0.00632236		-0.1236	-0.00250725	-0.00347016	-0.00391077	-0.0206975	-0.0128538	-0.00452346		-0.1236	-0.00249522	-0.00177003	-0.00152437	-0.0125522	-0.0123823	-0.00498949
-0.1234	0.000388654	0.000832948	0.0034887	0.00588798	0.00820965	0.0064778		-0.1234	0.00040711	0.00152565	0.00347728	0.00607513	0.00864672	0.00632693		-0.1234	-0.00250757	-0.00346977	-0.00391074	-0.0206963	-0.0128645	-0.0045262		-0.1234	-0.0024948	-0.00177485	-0.00152396	-0.0125461	-0.0124009	-0.00498492
-0.1232	0.000388871	0.000833262	0.00348878	0.00589027	0.00819898	0.00647171		-0.1232	0.000407319	0.0015238	0.00347683	0.00608048	0.00863179	0.00632876		-0.1232	-0.00250736	-0.00346945	-0.00391067	-0.0206941	-0.0128751	-0.0045323		-0.1232	-0.00249459	-0.0017767	-0.00152441	-0.0125408	-0.0124158	-0.00498309
-0.123	0.000389033	0.000833554	0.00348936	0.00589362	0.00818557	0.00646409		-0.123	0.000407597	0.00152295	0.00347741	0.00608536	0.00861655	0.00632754		-0.123	-0.00250719	-0.00346916	-0.00391008	-0.0206907	-0.0128886	-0.00453992		-0.123	-0.00249431	-0.00177756	-0.00152382	-0.0125359	-0.0124311	-0.00498431
-0.1228	0.000389358	0.00083377	0.0034899	0.00589881	0.00817277	0.00645555		-0.1228	0.000407806	0.00152235	0.00347538	0.00608988	0.00860253	0.00632571		-0.1228	-0.00250687	-0.00346895	-0.00390954	-0.0206855	-0.0129014	-0.00454845		-0.1228	-0.0024941	-0.00177815	-0.00152586	-0.0125314	-0.0124451	-0.00498614
-0.1226	0.000389196	0.000833575	0.00349071	0.00590497	0.00816058	0.00644824		-0.1226	0.000408293	0.00152228	0.00347408	0.00609322	0.00859277	0.00632388		-0.1226	-0.00250703	-0.00346914	-0.00390874	-0.0206793	-0.0129135	-0.00455577		-0.1226	-0.00249362	-0.00177822	-0.00152715	-0.012528	-0.0124548	-0.00498797
-0.1224	0.000388925	0.000833276	0.00349128	0.00591038	0.00814716	0.00644153		-0.1224	0.000408433	0.00152008	0.0034747	0.00609631	0.00858272	0.00632449		-0.1224	-0.0025073	-0.00346944	-0.00390816	-0.0206739	-0.012927	-0.00456247		-0.1224	-0.00249348	-0.00178043	-0.00152653	-0.0125249	-0.0124649	-0.00498736
-0.1222	0.000388654	0.000832971	0.0034919	0.00591295	0.00813406	0.00643574		-0.1222	0.000408433	0.00151568	0.00347247	0.00609831	0.00857052	0.00632449		-0.1222	-0.00250757	-0.00346974	-0.00390754	-0.0206714	-0.0129401	-0.00456826		-0.1222	-0.00249348	-0.00178483	-0.00152877	-0.0125229	-0.0124771	-0.00498736
-0.122	0.000388654	0.000833628	0.00349339	0.00591706	0.00812248	0.00642812		-0.122	0.000407876	0.00151152	0.00347087	0.00610236	0.00855315	0.00632419		-0.122	-0.00250757	-0.00346909	-0.00390605	-0.0206673	-0.0129516	-0.00457588		-0.122	-0.00249404	-0.00178899	-0.00153036	-0.0125189	-0.0124945	-0.00498766
-0.1218	0.000388817	0.000833457	0.00349508	0.00592016	0.00811242	0.00642172		-0.1218	0.000407597	0.00150636	0.00346888	0.00611121	0.00853212	0.0063248		-0.1218	-0.00250741	-0.00346926	-0.00390436	-0.0206642	-0.0129617	-0.00458228		-0.1218	-0.00249431	-0.00179415	-0.00153236	-0.01251	-0.0125155	-0.00498705
-0.1216	0.000388546	0.000833273	0.003496	0.00592201	0.00810266	0.00642172		-0.1216	0.000407249	0.00150002	0.00346806	0.00611867	0.00851078	0.00632663		-0.1216	-0.00250768	-0.00346944	-0.00390344	-0.0206623	-0.0129715	-0.00458228		-0.1216	-0.00249466	-0.00180049	-0.00153318	-0.0125026	-0.0125368	-0.00498522
-0.1214	0.000388167	0.000833577	0.0034972	0.00592379	0.00809291	0.00641928		-0.1214	0.00040711	0.00149113	0.00346594	0.00612288	0.00849372	0.00632845		-0.1214	-0.00250806	-0.00346914	-0.00390224	-0.0206605	-0.0129812	-0.00458472		-0.1214	-0.0024948	-0.00180937	-0.0015353	-0.0124984	-0.0125539	-0.00498339
-0.1212	0.000387842	0.000833985	0.00349837	0.0059252	0.00808346	0.00641044		-0.1212	0.00040711	0.00148109	0.00346305	0.00612743	0.00848091	0.00632632		-0.1212	-0.00250838	-0.00346873	-0.00390107	-0.0206591	-0.0129907	-0.00459356		-0.1212	-0.0024948	-0.00181941	-0.00153819	-0.0124938	-0.0125667	-0.00498553
-0.121	0.000387517	0.000834224	0.00350032	0.00592663	0.00807676	0.00639978		-0.121	0.000407249	0.00147279	0.00346113	0.00614352	0.00846903	0.00632236		-0.121	-0.00250871	-0.00346849	-0.00389912	-0.0206577	-0.0129974	-0.00460423		-0.121	-0.00249466	-0.00182772	-0.0015401	-0.0124777	-0.0125786	-0.00498949
-0.1208	0.000386705	0.000833848	0.00350207	0.00592873	0.00807036	0.00638758		-0.1208	0.000407806	0.00146297	0.00345863	0.00616301	0.00845775	0.0063126		-0.1208	-0.00250952	-0.00346887	-0.00389738	-0.0206556	-0.0130038	-0.00461642		-0.1208	-0.0024941	-0.00183754	-0.0015426	-0.0124582	-0.0125899	-0.00499924
-0.1206	0.000386488	0.000833093	0.00350425	0.0059325	0.00806487	0.00637692		-0.1206	0.000407876	0.00145353	0.00345391	0.00617775	0.00844434	0.00630346		-0.1206	-0.00250974	-0.00346962	-0.00389519	-0.0206518	-0.0130093	-0.00462709		-0.1206	-0.00249404	-0.00184698	-0.00154733	-0.0124435	-0.0126033	-0.00500839
-0.1204	0.000386272	0.000832728	0.00350595	0.00593643	0.00805969	0.00636686		-0.1204	0.000407528	0.00144348	0.00345084	0.0061815	0.00842971	0.0062998		-0.1204	-0.00250995	-0.00346999	-0.00389349	-0.0206479	-0.0130144	-0.00463715		-0.1204	-0.00249438	-0.00185702	-0.0015504	-0.0124398	-0.0126179	-0.00501205
-0.1202	0.000385839	0.00083259	0.00350674	0.00593927	0.00805725	0.00635771		-0.1202	0.000407806	0.00143196	0.00344925	0.00618569	0.0084166	0.00629889		-0.1202	-0.00251039	-0.00347013	-0.0038927	-0.020645	-0.0130169	-0.00464629		-0.1202	-0.0024941	-0.00186854	-0.00155199	-0.0124356	-0.012631	-0.00501296
-0.12	0.000385893	0.00083183	0.00350738	0.0059425	0.00805664	0.00635284		-0.12	0.000407876	0.00142243	0.00344787	0.00619235	0.00840014	0.00629828		-0.12	-0.00251033	-0.00347089	-0.00389206	-0.0206418	-0.0130175	-0.00465117		-0.12	-0.00249404	-0.00187807	-0.00155337	-0.0124289	-0.0126475	-0.00501357
-0.1198	0.000385568	0.000830775	0.00350887	0.00594753	0.00805481	0.00635253		-0.1198	0.000407945	0.0014141	0.00344471	0.00619927	0.00837789	0.00629523		-0.1198	-0.00251066	-0.00347194	-0.00389057	-0.0206368	-0.0130193	-0.00465147		-0.1198	-0.00249397	-0.00188641	-0.00155653	-0.012422	-0.0126697	-0.00501662
-0.1196	0.000384864	0.000830151	0.00351119	0.005951	0.00805481	0.00635375		-0.1196	0.000407806	0.00140466	0.00344422	0.0062042	0.00835168	0.00628883		-0.1196	-0.00251136	-0.00347256	-0.00388826	-0.0206333	-0.0130193	-0.00465025		-0.1196	-0.0024941	-0.00189585	-0.00155702	-0.0124171	-0.0126959	-0.00502302
-0.1194	0.000383185	0.000829858	0.0035138	0.00595609	0.00805603	0.00635314		-0.1194	0.000407806	0.00139387	0.00344245	0.00620842	0.00832456	0.00627999		-0.1194	-0.00251304	-0.00347286	-0.00388564	-0.0206282	-0.0130181	-0.00465086		-0.1194	-0.0024941	-0.00190664	-0.00155879	-0.0124128	-0.012723	-0.00503186
-0.1192	0.000381724	0.000829421	0.00351618	0.00596061	0.00805786	0.0063507		-0.1192	0.000407458	0.00138519	0.00344136	0.00621017	0.0082959	0.00627146		-0.1192	-0.0025145	-0.00347329	-0.00388326	-0.0206237	-0.0130163	-0.0046533		-0.1192	-0.00249445	-0.00191531	-0.00155987	-0.0124111	-0.0127517	-0.00504039
-0.119	0.000380803	0.00082906	0.00351793	0.00596456	0.00805786	0.00634888		-0.119	0.000407249	0.00137951	0.00344032	0.00621177	0.00826421	0.00626475		-0.119	-0.00251542	-0.00347366	-0.00388151	-0.0206198	-0.0130163	-0.00465513		-0.119	-0.00249466	-0.001921	-0.00156092	-0.0124095	-0.0127834	-0.0050471
-0.1188	0.000380965	0.000829002	0.00351957	0.00596649	0.00805756	0.00634522		-0.1188	0.000406831	0.00137319	0.00344144	0.00621227	0.00823098	0.00626414		-0.1188	-0.00251526	-0.00347371	-0.00387988	-0.0206178	-0.0130166	-0.00465879		-0.1188	-0.00249508	-0.00192732	-0.00155979	-0.012409	-0.0128166	-0.00504771
-0.1186	0.000381128	0.000828424	0.00352085	0.00597073	0.00805816	0.00634187		-0.1186	0.000406692	0.00136607	0.00344185	0.00621398	0.00819532	0.00626628		-0.1186	-0.0025151	-0.00347429	-0.0038786	-0.0206136	-0.013016	-0.00466214		-0.1186	-0.00249522	-0.00193444	-0.00155939	-0.0124073	-0.0128523	-0.00504557
-0.1184	0.000380803	0.00082796	0.00352159	0.00597494	0.00805725	0.00633912		-0.1184	0.000406483	0.00135949	0.00344377	0.00621437	0.00816149	0.00626445		-0.1184	-0.00251542	-0.00347476	-0.00387786	-0.0206094	-0.0130169	-0.00466488		-0.1184	-0.00249543	-0.00194101	-0.00155746	-0.0124069	-0.0128861	-0.0050474
-0.1182	0.000380316	0.000827902	0.00352292	0.00597733	0.00805695	0.00633668		-0.1182	0.000406623	0.00135628	0.00344805	0.00621471	0.00812431	0.0062617		-0.1182	-0.00251591	-0.00347481	-0.00387652	-0.020607	-0.0130172	-0.00466732		-0.1182	-0.00249529	-0.00194422	-0.00155319	-0.0124065	-0.0129233	-0.00505014
-0.118	0.000379287	0.000827687	0.00352428	0.00597988	0.00805451	0.00633242		-0.118	0.000406901	0.00135437	0.00344911	0.00621362	0.00808712	0.00625347		-0.118	-0.00251694	-0.00347503	-0.00387516	-0.0206044	-0.0130196	-0.00467159		-0.118	-0.00249501	-0.00194613	-0.00155212	-0.0124076	-0.0129605	-0.00505837
-0.1178	0.000377933	0.000827335	0.00352532	0.00598262	0.00805329	0.00632784		-0.1178	0.00040704	0.0013492	0.00344926	0.00621131	0.00804994	0.00624189		-0.1178	-0.00251829	-0.00347538	-0.00387412	-0.0206017	-0.0130208	-0.00467616		-0.1178	-0.00249487	-0.00195131	-0.00155197	-0.0124099	-0.0129977	-0.00506996
-0.1176	0.000377446	0.000827349	0.00352736	0.00598332	0.00805207	0.00632419		-0.1176	0.000407249	0.00134259	0.00344869	0.00620983	0.00800909	0.0062297		-0.1176	-0.00251878	-0.00347537	-0.00387208	-0.020601	-0.0130221	-0.00467982		-0.1176	-0.00249466	-0.00195791	-0.00155254	-0.0124114	-0.0130385	-0.00508215
-0.1174	0.000377717	0.000827257	0.00352897	0.00598196	0.00805298	0.00631992		-0.1174	0.000406971	0.00133531	0.00344787	0.00620829	0.00796734	0.00621659		-0.1174	-0.00251851	-0.00347546	-0.00387048	-0.0206024	-0.0130211	-0.00468409		-0.1174	-0.00249494	-0.00196519	-0.00155337	-0.012413	-0.0130803	-0.00509525
-0.1172	0.000377121	0.000827349	0.00352949	0.00597966	0.0080542	0.00631474		-0.1172	0.00040711	0.00132793	0.00344795	0.0062073	0.00792649	0.00620196		-0.1172	-0.0025191	-0.00347537	-0.00386995	-0.0206047	-0.0130199	-0.00468927		-0.1172	-0.0024948	-0.00197257	-0.00155328	-0.012414	-0.0131211	-0.00510988
-0.117	0.000376742	0.000828186	0.00353167	0.00597568	0.00805573	0.00631108		-0.117	0.000407667	0.00132156	0.00344705	0.00620834	0.00789388	0.00618551		-0.117	-0.00251948	-0.00347453	-0.00386777	-0.0206086	-0.0130184	-0.00469293		-0.117	-0.00249424	-0.00197895	-0.00155419	-0.0124129	-0.0131537	-0.00512634
-0.1168	0.000376688	0.000829072	0.00353278	0.00597219	0.00805603	0.00630803		-0.1168	0.000407806	0.00131732	0.00344937	0.0062097	0.00786767	0.00616813		-0.1168	-0.00251954	-0.00347364	-0.00386667	-0.0206121	-0.0130181	-0.00469597		-0.1168	-0.0024941	-0.00198318	-0.00155187	-0.0124116	-0.0131799	-0.00514372
-0.1166	0.000376634	0.000829769	0.0035328	0.00596783	0.00805999	0.00630559		-0.1166	0.000408015	0.00131674	0.00344892	0.00621082	0.00784389	0.00615472		-0.1166	-0.00251959	-0.00347295	-0.00386664	-0.0206165	-0.0130141	-0.00469841		-0.1166	-0.0024939	-0.00198377	-0.00155231	-0.0124104	-0.0132037	-0.00515713
-0.1164	0.000376417	0.000829705	0.00353293	0.00596168	0.00806426	0.00630407		-0.1164	0.000408572	0.00131572	0.00344896	0.00621062	0.00782561	0.00614619		-0.1164	-0.00251981	-0.00347301	-0.00386652	-0.0206226	-0.0130099	-0.00469994		-0.1164	-0.00249334	-0.00198479	-0.00155228	-0.0124106	-0.013222	-0.00516566
-0.1162	0.000376255	0.000830086	0.00353395	0.00595864	0.00806914	0.00630163		-0.1162	0.000408293	0.00131267	0.00344842	0.00621233	0.00780732	0.00612881		-0.1162	-0.00251997	-0.00347263	-0.00386549	-0.0206257	-0.013005	-0.00470237		-0.1162	-0.00249362	-0.00198784	-0.00155282	-0.0124089	-0.0132403	-0.00518304
-0.116	0.000376255	0.000830459	0.00353327	0.00595899	0.00807462	0.0062998		-0.116	0.000407806	0.00130807	0.00344781	0.00621271	0.00779421	0.00611022		-0.116	-0.00251997	-0.00347226	-0.00386617	-0.0206253	-0.0129995	-0.0047042		-0.116	-0.0024941	-0.00199244	-0.00155342	-0.0124085	-0.0132534	-0.00520163
-0.1158	0.000376201	0.000831618	0.00353406	0.00596349	0.00808041	0.00629828		-0.1158	0.000407806	0.00130339	0.00344403	0.00621353	0.00778324	0.00609254		-0.1158	-0.00252003	-0.0034711	-0.00386538	-0.0206208	-0.0129937	-0.00470573		-0.1158	-0.0024941	-0.00199712	-0.0015572	-0.0124077	-0.0132644	-0.00521931
-0.1156	0.000376471	0.000832191	0.00353417	0.00596839	0.00808621	0.00629462		-0.1156	0.000407876	0.00129775	0.00344008	0.00621367	0.00777653	0.00607578		-0.1156	-0.00251975	-0.00347052	-0.00386527	-0.0206159	-0.0129879	-0.00470938		-0.1156	-0.00249404	-0.00200276	-0.00156115	-0.0124076	-0.0132711	-0.00523607
-0.1154	0.000376417	0.000832468	0.00353315	0.00596994	0.0080923	0.00629432		-0.1154	0.000408154	0.00129387	0.00343593	0.00621469	0.00776739	0.0060642		-0.1154	-0.00251981	-0.00347025	-0.00386629	-0.0206144	-0.0129818	-0.00470969		-0.1154	-0.00249376	-0.00200664	-0.00156531	-0.0124066	-0.0132802	-0.00524765
-0.1152	0.000376255	0.000832923	0.00353308	0.00596896	0.00809748	0.00629371		-0.1152	0.000408224	0.00128741	0.00343196	0.00621589	0.00775337	0.00605566		-0.1152	-0.00251997	-0.00346979	-0.00386636	-0.0206154	-0.0129766	-0.0047103		-0.1152	-0.00249369	-0.00201309	-0.00156927	-0.0124054	-0.0132942	-0.00525619
-0.115	0.000376038	0.000833002	0.00353189	0.00596719	0.0081048	0.00629188		-0.115	0.000408084	0.00128325	0.00342686	0.00621694	0.00773752	0.00605444		-0.115	-0.00252019	-0.00346971	-0.00386755	-0.0206171	-0.0129693	-0.00471213		-0.115	-0.00249383	-0.00201726	-0.00157437	-0.0124043	-0.0133101	-0.00525741
-0.1148	0.000376201	0.00083328	0.00353236	0.0059607	0.00811181	0.00629066		-0.1148	0.000408015	0.00128073	0.00342271	0.00621896	0.00772228	0.00605963		-0.1148	-0.00252003	-0.00346944	-0.00386708	-0.0206236	-0.0129623	-0.00471335		-0.1148	-0.0024939	-0.00201978	-0.00157852	-0.0124023	-0.0133253	-0.00525222
-0.1146	0.000376147	0.000833527	0.00353232	0.00595237	0.00811821	0.00628914		-0.1146	0.000408154	0.0012768	0.00341999	0.00622113	0.0077107	0.0060642		-0.1146	-0.00252008	-0.00346919	-0.00386713	-0.0206319	-0.0129559	-0.00471487		-0.1146	-0.00249376	-0.00202371	-0.00158124	-0.0124001	-0.0133369	-0.00524765
-0.1144	0.000376255	0.000833678	0.00353248	0.0059495	0.00812491	0.00628883		-0.1144	0.000407945	0.00127444	0.00341742	0.00622393	0.00770369	0.00606542		-0.1144	-0.00251997	-0.00346904	-0.00386696	-0.0206348	-0.0129492	-0.00471518		-0.1144	-0.00249397	-0.00202607	-0.00158382	-0.0123973	-0.0133439	-0.00524643
-0.1142	0.000376526	0.000833525	0.00353298	0.00594929	0.00813314	0.0062867		-0.1142	0.000408015	0.00126758	0.00341533	0.00622737	0.00769607	0.0060645		-0.1142	-0.0025197	-0.00346919	-0.00386646	-0.020635	-0.012941	-0.00471731		-0.1142	-0.0024939	-0.00203293	-0.0015859	-0.0123939	-0.0133515	-0.00524735
-0.114	0.00037658	0.000833931	0.00353287	0.00595227	0.00814046	0.00628456		-0.114	0.000407736	0.001258	0.00341317	0.00622904	0.00768875	0.00606023		-0.114	-0.00251965	-0.00346878	-0.00386658	-0.020632	-0.0129337	-0.00471944		-0.114	-0.00249417	-0.00204251	-0.00158807	-0.0123922	-0.0133589	-0.00525161
-0.1138	0.000376417	0.000835229	0.00353256	0.00595844	0.00814625	0.00628578		-0.1138	0.000407806	0.00124987	0.00340916	0.0062309	0.007679	0.00605597		-0.1138	-0.00251981	-0.00346749	-0.00386688	-0.0206259	-0.0129279	-0.00471822		-0.1138	-0.0024941	-0.00205063	-0.00159208	-0.0123904	-0.0133686	-0.00525588
-0.1136	0.000376201	0.000835469	0.00353227	0.005967	0.00815296	0.00628487		-0.1136	0.000407945	0.00124479	0.00341106	0.00623456	0.00766955	0.00605261		-0.1136	-0.00252003	-0.00346725	-0.00386717	-0.0206173	-0.0129212	-0.00471914		-0.1136	-0.00249397	-0.00205572	-0.00159017	-0.0123867	-0.0133781	-0.00525923
-0.1134	0.000376309	0.000836359	0.00353268	0.00597615	0.00815783	0.00628426		-0.1134	0.000407945	0.00124192	0.00341404	0.00623741	0.00765949	0.00604926		-0.1134	-0.00251992	-0.00346636	-0.00386676	-0.0206082	-0.0129163	-0.00471975		-0.1134	-0.00249397	-0.00205858	-0.0015872	-0.0123838	-0.0133881	-0.00526259
-0.1132	0.000376634	0.00083711	0.0035326	0.00598805	0.00816362	0.00628152		-0.1132	0.000408433	0.00123747	0.00341389	0.00624059	0.00765004	0.00604408		-0.1132	-0.00251959	-0.00346561	-0.00386685	-0.0205963	-0.0129105	-0.00472249		-0.1132	-0.00249348	-0.00206304	-0.00158734	-0.0123807	-0.0133976	-0.00526777
-0.113	0.000376634	0.000837764	0.00353297	0.00599965	0.00816789	0.00627969		-0.113	0.000408433	0.00123144	0.00341363	0.00624537	0.00763877	0.00603616		-0.113	-0.00251959	-0.00346495	-0.00386647	-0.0205847	-0.0129062	-0.00472432		-0.113	-0.00249348	-0.00206907	-0.00158761	-0.0123759	-0.0134088	-0.00527569
-0.1128	0.000376796	0.000839099	0.00353273	0.00601332	0.00817033	0.00627664		-0.1128	0.000408433	0.00122531	0.00341241	0.00624845	0.00762414	0.00603067		-0.1128	-0.00251943	-0.00346362	-0.00386671	-0.020571	-0.0129038	-0.00472737		-0.1128	-0.00249348	-0.0020752	-0.00158882	-0.0123728	-0.0134235	-0.00528118
-0.1126	0.000377121	0.000840339	0.00353228	0.00602612	0.00817429	0.00627298		-0.1126	0.000408502	0.00121821	0.00341027	0.006251	0.00760676	0.00602732		-0.1126	-0.0025191	-0.00346238	-0.00386716	-0.0205582	-0.0128998	-0.00473102		-0.1126	-0.00249341	-0.00208229	-0.00159097	-0.0123703	-0.0134408	-0.00528453
-0.1124	0.000376959	0.000841145	0.00353221	0.00603683	0.00817764	0.00626658		-0.1124	0.000408502	0.00121206	0.00341027	0.00625464	0.00758482	0.00603067		-0.1124	-0.00251927	-0.00346157	-0.00386724	-0.0205475	-0.0128965	-0.00473743		-0.1124	-0.00249341	-0.00208845	-0.00159097	-0.0123666	-0.0134628	-0.00528118
-0.1122	0.00037685	0.000842198	0.00353266	0.00604784	0.00818039	0.00625835		-0.1122	0.000408224	0.00120866	0.00341034	0.00625778	0.00755922	0.00602976		-0.1122	-0.00251938	-0.00346052	-0.00386679	-0.0205365	-0.0128937	-0.00474565		-0.1122	-0.00249369	-0.00209185	-0.0015909	-0.0123635	-0.0134884	-0.00528209
-0.112	0.00037658	0.000842693	0.00353347	0.00605878	0.00818191	0.00625165		-0.112	0.000408224	0.00120427	0.00341327	0.00625878	0.007533	0.00602671		-0.112	-0.00251965	-0.00346002	-0.00386597	-0.0205255	-0.0128922	-0.00475236		-0.112	-0.00249369	-0.00209624	-0.00158797	-0.0123625	-0.0135146	-0.00528514
-0.1118	0.000376796	0.000842953	0.00353355	0.00606937	0.0081813	0.00624342		-0.1118	0.000408433	0.00120049	0.0034182	0.00626053	0.00750618	0.00602335		-0.1118	-0.00251943	-0.00345976	-0.0038659	-0.020515	-0.0128928	-0.00476059		-0.1118	-0.00249348	-0.00210002	-0.00158304	-0.0123607	-0.0135414	-0.00528849
-0.1116	0.00037685	0.000844241	0.00353509	0.00607964	0.008181	0.00623488		-0.1116	0.00040892	0.00119726	0.00342093	0.00626018	0.00747875	0.00602061		-0.1116	-0.00251938	-0.00345847	-0.00386436	-0.0205047	-0.0128931	-0.00476912		-0.1116	-0.00249299	-0.00210325	-0.00158031	-0.0123611	-0.0135689	-0.00529124
-0.1114	0.000377121	0.000846513	0.0035361	0.0060868	0.00818161	0.00622604		-0.1114	0.000408989	0.00119564	0.00342282	0.00626096	0.00744979	0.00601939		-0.1114	-0.0025191	-0.0034562	-0.00386335	-0.0204975	-0.0128925	-0.00477796		-0.1114	-0.00249292	-0.00210487	-0.00157842	-0.0123603	-0.0135978	-0.00529246
-0.1112	0.000377175	0.000847974	0.0035359	0.00609261	0.00818313	0.00621842		-0.1112	0.00040885	0.00119652	0.00342184	0.00625902	0.00741992	0.00602396		-0.1112	-0.00251905	-0.00345474	-0.00386355	-0.0204917	-0.012891	-0.00478558		-0.1112	-0.00249306	-0.00210399	-0.0015794	-0.0123622	-0.0136277	-0.00528788
-0.111	0.000377121	0.000848729	0.00353683	0.00609812	0.00818526	0.00621355		-0.111	0.00040892	0.00119683	0.0034222	0.00626032	0.00739127	0.00602945		-0.111	-0.0025191	-0.00345399	-0.00386261	-0.0204862	-0.0128889	-0.00479046		-0.111	-0.00249299	-0.00210367	-0.00157904	-0.0123609	-0.0136563	-0.0052824
-0.1108	0.000377067	0.000848639	0.00353634	0.00610119	0.00818587	0.00620745		-0.1108	0.000409059	0.00119539	0.00342127	0.00626128	0.0073675	0.00603585		-0.1108	-0.00251916	-0.00345408	-0.0038631	-0.0204831	-0.0128882	-0.00479656		-0.1108	-0.00249285	-0.00210512	-0.00157997	-0.01236	-0.0136801	-0.005276
-0.1106	0.000376363	0.000848501	0.00353611	0.00610606	0.00818709	0.00620257		-0.1106	0.000408781	0.00119728	0.00342023	0.00626222	0.00734952	0.00604225		-0.1106	-0.00251986	-0.00345421	-0.00386333	-0.0204783	-0.012887	-0.00480143		-0.1106	-0.00249313	-0.00210323	-0.001581	-0.012359	-0.0136981	-0.0052696
-0.1104	0.00037593	0.000849243	0.003538	0.00611131	0.00819258	0.00619709		-0.1104	0.000408641	0.00120024	0.00341823	0.00626529	0.00733336	0.00604743		-0.1104	-0.0025203	-0.00345347	-0.00386144	-0.020473	-0.0128815	-0.00480692		-0.1104	-0.00249327	-0.00210026	-0.001583	-0.012356	-0.0137142	-0.00526442
-0.1102	0.000375551	0.000849854	0.0035368	0.00611634	0.00819837	0.00619282		-0.1102	0.000408433	0.00120222	0.00341711	0.00626733	0.00732087	0.00605322		-0.1102	-0.00252067	-0.00345286	-0.00386264	-0.020468	-0.0128758	-0.00481119		-0.1102	-0.00249348	-0.00209828	-0.00158412	-0.0123539	-0.0137267	-0.00525862
-0.11	0.00037528	0.000850714	0.00353738	0.00612006	0.00820416	0.00618703		-0.11	0.000408711	0.00120142	0.00341432	0.00627012	0.00731233	0.00605963		-0.11	-0.00252095	-0.003452	-0.00386207	-0.0204643	-0.01287	-0.00481698		-0.11	-0.0024932	-0.00209908	-0.00158691	-0.0123511	-0.0137353	-0.00525222
-0.1098	0.000375064	0.000850832	0.00353755	0.00611953	0.00821026	0.00618307		-0.1098	0.000409059	0.00119946	0.00341111	0.00627291	0.00730928	0.00606785		-0.1098	-0.00252116	-0.00345188	-0.00386189	-0.0204648	-0.0128639	-0.00482094		-0.1098	-0.00249285	-0.00210104	-0.00159012	-0.0123483	-0.0137383	-0.00524399
-0.1096	0.000374847	0.000850422	0.00353709	0.00611763	0.00821757	0.00618307		-0.1096	0.000409129	0.00119557	0.00340665	0.00627645	0.00730928	0.00607547		-0.1096	-0.00252138	-0.00345229	-0.00386236	-0.0204667	-0.0128565	-0.00482094		-0.1096	-0.00249278	-0.00210494	-0.00159459	-0.0123448	-0.0137383	-0.00523637
-0.1094	0.000374901	0.000850108	0.00353849	0.0061194	0.00822733	0.00618429		-0.1094	0.000409129	0.001191	0.0034016	0.00627911	0.00731599	0.00608279		-0.1094	-0.00252132	-0.00345261	-0.00386095	-0.0204649	-0.0128468	-0.00481972		-0.1094	-0.00249278	-0.0021095	-0.00159963	-0.0123421	-0.0137316	-0.00522906
-0.1092	0.000374847	0.000850092	0.0035394	0.00612485	0.00823586	0.00618672		-0.1092	0.000408711	0.00118896	0.0033961	0.00628352	0.00732148	0.00609285		-0.1092	-0.00252138	-0.00345262	-0.00386004	-0.0204595	-0.0128383	-0.00481728		-0.1092	-0.0024932	-0.00211155	-0.00160514	-0.0123377	-0.0137261	-0.005219
-0.109	0.000374739	0.000850141	0.00353924	0.00613297	0.00824592	0.00618642		-0.109	0.000408502	0.00118654	0.00339004	0.00628843	0.00732483	0.00610138		-0.109	-0.00252149	-0.00345257	-0.0038602	-0.0204514	-0.0128282	-0.00481759		-0.109	-0.00249341	-0.00211396	-0.00161119	-0.0123328	-0.0137228	-0.00521047
-0.1088	0.000374793	0.000851546	0.00353959	0.00614065	0.00825811	0.00618368		-0.1088	0.000408084	0.00118144	0.00338342	0.00629289	0.00732788	0.00610931		-0.1088	-0.00252143	-0.00345117	-0.00385985	-0.0204437	-0.012816	-0.00482033		-0.1088	-0.00249383	-0.00211907	-0.00161782	-0.0123284	-0.0137197	-0.00520254
-0.1086	0.000374847	0.000852798	0.00354027	0.00614859	0.00827213	0.0061791		-0.1086	0.000408084	0.00117702	0.0033763	0.00629695	0.00733489	0.0061154		-0.1086	-0.00252138	-0.00344992	-0.00385917	-0.0204357	-0.012802	-0.0048249		-0.1086	-0.00249383	-0.00212348	-0.00162493	-0.0123243	-0.0137127	-0.00519645
-0.1084	0.00037436	0.000852963	0.00354125	0.00615679	0.00828554	0.00617179		-0.1084	0.000408433	0.00117458	0.00337217	0.00630002	0.00734921	0.00611906		-0.1084	-0.00252187	-0.00344975	-0.0038582	-0.0204275	-0.0127886	-0.00483222		-0.1084	-0.00249348	-0.00212593	-0.00162907	-0.0123212	-0.0136984	-0.00519279
-0.1082	0.000373981	0.000853953	0.00354068	0.00616467	0.00829865	0.00616569		-0.1082	0.000408433	0.00117311	0.00336625	0.0063045	0.00736811	0.00612272		-0.1082	-0.00252225	-0.00344876	-0.00385876	-0.0204196	-0.0127755	-0.00483831		-0.1082	-0.00249348	-0.0021274	-0.00163498	-0.0123168	-0.0136795	-0.00518913
-0.108	0.000373764	0.000855152	0.00354079	0.00617137	0.00830901	0.00616021		-0.108	0.000407876	0.00117095	0.00336161	0.00630671	0.00738944	0.00612942		-0.108	-0.00252246	-0.00344756	-0.00385865	-0.020413	-0.0127651	-0.0048438		-0.108	-0.00249404	-0.00212955	-0.00163962	-0.0123145	-0.0136582	-0.00518243
-0.1078	0.000373656	0.000856569	0.00354107	0.00617473	0.00831998	0.0061535		-0.1078	0.000407876	0.00116831	0.00335884	0.00631082	0.00741505	0.00613918		-0.1078	-0.00252257	-0.00344615	-0.00385837	-0.0204096	-0.0127541	-0.0048505		-0.1078	-0.00249404	-0.0021322	-0.00164239	-0.0123104	-0.0136326	-0.00517267
-0.1076	0.000373764	0.000858931	0.00354188	0.00617796	0.00832821	0.00614771		-0.1076	0.000407528	0.00116445	0.00335539	0.00631537	0.00744004	0.00615198		-0.1076	-0.00252246	-0.00344378	-0.00385757	-0.0204064	-0.0127459	-0.0048563		-0.1076	-0.00249438	-0.00213606	-0.00164585	-0.0123059	-0.0136076	-0.00515987
-0.1074	0.000373331	0.000863085	0.00354238	0.00617748	0.0083337	0.00614009		-0.1074	0.00040711	0.00116076	0.00335386	0.00631909	0.00746321	0.00616417		-0.1074	-0.00252289	-0.00343963	-0.00385706	-0.0204068	-0.0127404	-0.00486392		-0.1074	-0.0024948	-0.00213974	-0.00164738	-0.0123022	-0.0135844	-0.00514768
-0.1072	0.000373439	0.000867379	0.00354249	0.00617562	0.00833858	0.00613582		-0.1072	0.00040711	0.00115749	0.00335113	0.00632362	0.00748546	0.0061785		-0.1072	-0.00252279	-0.00343534	-0.00385695	-0.0204087	-0.0127355	-0.00486818		-0.1072	-0.0024948	-0.00214301	-0.00165011	-0.0122976	-0.0135621	-0.00513335
-0.107	0.000373548	0.000869688	0.0035422	0.00617293	0.00834315	0.00613674		-0.107	0.00040711	0.00115477	0.00335001	0.00632756	0.00750344	0.00619404		-0.107	-0.00252268	-0.00343303	-0.00385724	-0.0204114	-0.012731	-0.00486727		-0.107	-0.0024948	-0.00214574	-0.00165123	-0.0122937	-0.0135442	-0.00511781
-0.1068	0.000373493	0.000874843	0.00354276	0.00616887	0.00834559	0.00613217		-0.1068	0.000407249	0.00115374	0.00334975	0.00633252	0.00751593	0.00620806		-0.1068	-0.00252273	-0.00342787	-0.00385669	-0.0204154	-0.0127285	-0.00487184		-0.1068	-0.00249466	-0.00214677	-0.00165148	-0.0122887	-0.0135317	-0.00510379
-0.1066	0.000373006	0.000881848	0.00354275	0.00616693	0.00834833	0.00612333		-0.1066	0.000406971	0.00115393	0.00334857	0.00633819	0.00752355	0.00621934		-0.1066	-0.00252322	-0.00342087	-0.00385669	-0.0204174	-0.0127258	-0.00488068		-0.1066	-0.00249494	-0.00214658	-0.00165267	-0.0122831	-0.013524	-0.00509251
-0.1064	0.000373006	0.000888556	0.0035423	0.00616665	0.00835351	0.00611266		-0.1064	0.000406762	0.00115233	0.00334685	0.00634376	0.0075266	0.00622818		-0.1064	-0.00252322	-0.00341416	-0.00385715	-0.0204177	-0.0127206	-0.00489135		-0.1064	-0.00249515	-0.00214818	-0.00165438	-0.0122775	-0.013521	-0.00508367
-0.1062	0.000373169	0.000892418	0.00354131	0.00616729	0.00836052	0.00609894		-0.1062	0.000406483	0.00115161	0.00334563	0.00634866	0.00752782	0.00623062		-0.1062	-0.00252306	-0.0034103	-0.00385813	-0.020417	-0.0127136	-0.00490506		-0.1062	-0.00249543	-0.00214889	-0.0016556	-0.0122726	-0.0135198	-0.00508123
-0.106	0.000373223	0.000895044	0.00354081	0.00616688	0.00836723	0.00608767		-0.106	0.000406623	0.00115307	0.0033436	0.00635562	0.00753148	0.00623641		-0.106	-0.002523	-0.00340767	-0.00385863	-0.0204174	-0.0127069	-0.00491634		-0.106	-0.00249529	-0.00214743	-0.00165764	-0.0122656	-0.0135161	-0.00507544
-0.1058	0.000373277	0.000898672	0.00354033	0.00616202	0.00836875	0.00607608		-0.1058	0.000406623	0.0011559	0.00334007	0.0063623	0.00753422	0.00624738		-0.1058	-0.00252295	-0.00340404	-0.00385911	-0.0204223	-0.0127054	-0.00492792		-0.1058	-0.00249529	-0.00214461	-0.00166116	-0.012259	-0.0135134	-0.00506447
-0.1056	0.000373277	0.000903049	0.00353961	0.0061553	0.00836692	0.00606846		-0.1056	0.000406623	0.001158	0.00333737	0.00637043	0.00753605	0.00626201		-0.1056	-0.00252295	-0.00339967	-0.00385984	-0.020429	-0.0127072	-0.00493554		-0.1056	-0.00249529	-0.00214251	-0.00166386	-0.0122508	-0.0135116	-0.00504984
-0.1054	0.000373385	0.000906398	0.00353879	0.00614689	0.00836083	0.00606481		-0.1054	0.000406901	0.00115874	0.00333444	0.00637777	0.00753483	0.00627847		-0.1054	-0.00252284	-0.00339632	-0.00386065	-0.0204374	-0.0127133	-0.0049392		-0.1054	-0.00249501	-0.00214177	-0.00166679	-0.0122435	-0.0135128	-0.00503338
-0.1052	0.000373385	0.000909832	0.00353855	0.00613943	0.00835534	0.00606694		-0.1052	0.000406762	0.00115866	0.00333121	0.00638501	0.00753148	0.00629462		-0.1052	-0.00252284	-0.00339288	-0.00386089	-0.0204449	-0.0127188	-0.00493707		-0.1052	-0.00249515	-0.00214185	-0.00167003	-0.0122362	-0.0135161	-0.00501723
-0.105	0.000373277	0.000912785	0.0035375	0.00613218	0.00834741	0.00607212		-0.105	0.000406901	0.00115716	0.00332858	0.00639098	0.00752691	0.00630803		-0.105	-0.00252295	-0.00338993	-0.00386194	-0.0204521	-0.0127267	-0.00493188		-0.105	-0.00249501	-0.00214335	-0.00167265	-0.0122303	-0.0135207	-0.00500382
-0.1048	0.000373277	0.000916155	0.0035363	0.00612434	0.0083404	0.00607669		-0.1048	0.000407319	0.00115576	0.00332523	0.00639495	0.00752569	0.00631657		-0.1048	-0.00252295	-0.00338656	-0.00386315	-0.02046	-0.0127337	-0.00492731		-0.1048	-0.00249459	-0.00214474	-0.001676	-0.0122263	-0.0135219	-0.00499528
-0.1046	0.000373277	0.000918497	0.00353631	0.00611635	0.00833339	0.00607913		-0.1046	0.000407528	0.00115497	0.00332262	0.00639674	0.00752691	0.00632388		-0.1046	-0.00252295	-0.00338422	-0.00386313	-0.020468	-0.0127407	-0.00492487		-0.1046	-0.00249438	-0.00214554	-0.00167861	-0.0122245	-0.0135207	-0.00498797
-0.1044	0.000373114	0.000921407	0.00353521	0.00611008	0.00832699	0.00608248		-0.1044	0.000407806	0.00115492	0.0033197	0.00640119	0.00753117	0.00633211		-0.1044	-0.00252311	-0.00338131	-0.00386423	-0.0204742	-0.0127471	-0.00492152		-0.1044	-0.0024941	-0.00214559	-0.00168154	-0.0122201	-0.0135164	-0.00497974
-0.1042	0.00037279	0.000923633	0.00353304	0.00610429	0.00832059	0.00608767		-0.1042	0.000408015	0.00115634	0.0033177	0.00640825	0.00753636	0.0063376		-0.1042	-0.00252344	-0.00337908	-0.0038664	-0.02048	-0.0127535	-0.00491634		-0.1042	-0.0024939	-0.00214417	-0.00168353	-0.012213	-0.0135112	-0.00497425
-0.104	0.000372302	0.00092548	0.00353078	0.00609918	0.00831724	0.00609285		-0.104	0.000407945	0.00115649	0.00331411	0.00641863	0.00754215	0.00634095		-0.104	-0.00252392	-0.00337724	-0.00386866	-0.0204851	-0.0127569	-0.00491116		-0.104	-0.00249397	-0.00214402	-0.00168712	-0.0122026	-0.0135055	-0.0049709
-0.1038	0.000371544	0.000926953	0.00352957	0.00609539	0.00831694	0.00609651		-0.1038	0.000407528	0.00115368	0.00331254	0.00642999	0.00755129	0.00635101		-0.1038	-0.00252468	-0.00337576	-0.00386987	-0.0204889	-0.0127572	-0.0049075		-0.1038	-0.00249438	-0.00214683	-0.00168869	-0.0121913	-0.0134963	-0.00496084
-0.1036	0.000370624	0.00092647	0.0035275	0.00609141	0.0083209	0.00610138		-0.1036	0.00040711	0.00114811	0.00331081	0.00644083	0.00756653	0.00636259		-0.1036	-0.0025256	-0.00337625	-0.00387194	-0.0204929	-0.0127532	-0.00490262		-0.1036	-0.0024948	-0.0021524	-0.00169042	-0.0121804	-0.0134811	-0.00494926
-0.1034	0.000370299	0.000927651	0.00352547	0.00608719	0.00832943	0.00610626		-0.1034	0.000406135	0.00114214	0.00331088	0.0064518	0.00758726	0.00637478		-0.1034	-0.00252593	-0.00337506	-0.00387397	-0.0204971	-0.0127447	-0.00489775		-0.1034	-0.00249578	-0.00215837	-0.00169036	-0.0121695	-0.0134603	-0.00493707
-0.1032	0.000369812	0.000927288	0.00352413	0.00608524	0.0083398	0.00611053		-0.1032	0.000405578	0.00113717	0.00330918	0.0064623	0.00761286	0.00638545		-0.1032	-0.00252641	-0.00337543	-0.00387531	-0.0204991	-0.0127343	-0.00489348		-0.1032	-0.00249633	-0.00216334	-0.00169205	-0.012159	-0.0134347	-0.0049264
-0.103	0.000369541	0.000923824	0.00352189	0.00608466	0.00835077	0.00611601		-0.103	0.000405439	0.00113516	0.00330829	0.00647128	0.00764334	0.00639338		-0.103	-0.00252668	-0.00337889	-0.00387755	-0.0204997	-0.0127234	-0.00488799		-0.103	-0.00249647	-0.00216534	-0.00169295	-0.01215	-0.0134043	-0.00491847
-0.1028	0.000369487	0.000919822	0.00352104	0.0060864	0.00836083	0.00612394		-0.1028	0.000405509	0.00113416	0.00330699	0.00647862	0.00767961	0.00639734		-0.1028	-0.00252674	-0.00338289	-0.0038784	-0.0204979	-0.0127133	-0.00488007		-0.1028	-0.0024964	-0.00216635	-0.00169425	-0.0121426	-0.013368	-0.00491451
-0.1026	0.000368783	0.000915889	0.00351965	0.00608871	0.00837363	0.00613369		-0.1026	0.000405578	0.00113349	0.00330757	0.00648429	0.00771862	0.00639886		-0.1026	-0.00252744	-0.00338683	-0.00387979	-0.0204956	-0.0127005	-0.00487032		-0.1026	-0.00249633	-0.00216701	-0.00169366	-0.012137	-0.013329	-0.00491299
-0.1024	0.000367375	0.000912654	0.00351931	0.00609188	0.00838704	0.00614192		-0.1024	0.000404952	0.0011328	0.00330673	0.00649015	0.00775794	0.00639947		-0.1024	-0.00252885	-0.00339006	-0.00388013	-0.0204924	-0.0126871	-0.00486209		-0.1024	-0.00249696	-0.00216771	-0.0016945	-0.0121311	-0.0132897	-0.00491238
-0.1022	0.000366238	0.000909753	0.00351767	0.00609499	0.00839953	0.00614802		-0.1022	0.000403768	0.00113183	0.00330486	0.00649623	0.00780061	0.00640069		-0.1022	-0.00252999	-0.00339296	-0.00388178	-0.0204893	-0.0126746	-0.00485599		-0.1022	-0.00249814	-0.00216867	-0.00169638	-0.012125	-0.013247	-0.00491116
-0.102	0.000365534	0.000907251	0.00351723	0.00609845	0.00841051	0.00614954		-0.102	0.000402585	0.00113023	0.00330395	0.00650071	0.0078445	0.00640221		-0.102	-0.00253069	-0.00339546	-0.00388221	-0.0204859	-0.0126636	-0.00485447		-0.102	-0.00249933	-0.00217027	-0.00169729	-0.0121205	-0.0132031	-0.00490963
-0.1018	0.000364181	0.000903585	0.00351657	0.0061007	0.00842057	0.00614923		-0.1018	0.00040168	0.00112907	0.00330425	0.00650511	0.00788931	0.00640465		-0.1018	-0.00253205	-0.00339913	-0.00388287	-0.0204836	-0.0126536	-0.00485477		-0.1018	-0.00250023	-0.00217143	-0.00169699	-0.0121161	-0.0131583	-0.0049072
-0.1016	0.00036234	0.000898813	0.00351672	0.00610241	0.0084291	0.00615167		-0.1016	0.000401262	0.00112701	0.00330412	0.00650738	0.00793137	0.00640679		-0.1016	-0.00253389	-0.0034039	-0.00388272	-0.0204819	-0.012645	-0.00485233		-0.1016	-0.00250065	-0.0021735	-0.00169711	-0.0121139	-0.0131162	-0.00490506
-0.1014	0.00036039	0.000894347	0.00351521	0.00610345	0.0084352	0.00615564		-0.1014	0.000401541	0.00112381	0.00330524	0.00651169	0.00797191	0.00640862		-0.1014	-0.00253584	-0.00340837	-0.00388423	-0.0204809	-0.0126389	-0.00484837		-0.1014	-0.00250037	-0.0021767	-0.00169599	-0.0121096	-0.0130757	-0.00490323
-0.1012	0.000359795	0.000889024	0.0035142	0.00610351	0.00843916	0.00616021		-0.1012	0.000401332	0.00112041	0.00330483	0.00652552	0.00800726	0.00641258		-0.1012	-0.00253643	-0.00341369	-0.00388524	-0.0204808	-0.012635	-0.0048438		-0.1012	-0.00250058	-0.00218009	-0.00169641	-0.0120957	-0.0130403	-0.00489927
-0.101	0.000359632	0.000885794	0.00351407	0.00610429	0.0084419	0.00616722		-0.101	0.000401123	0.0011192	0.00330478	0.00654404	0.00803835	0.00641593		-0.101	-0.00253659	-0.00341692	-0.00388537	-0.02048	-0.0126322	-0.00483679		-0.101	-0.00250079	-0.00218131	-0.00169645	-0.0120772	-0.0130093	-0.00489592
-0.1008	0.000359253	0.000883185	0.00351427	0.00610309	0.00844129	0.00617423		-0.1008	0.000401332	0.00111838	0.00330466	0.0065554	0.00806365	0.00641837		-0.1008	-0.00253697	-0.00341953	-0.00388517	-0.0204812	-0.0126328	-0.00482978		-0.1008	-0.00250058	-0.00218213	-0.00169657	-0.0120659	-0.012984	-0.00489348
-0.1006	0.000358766	0.000881917	0.00351326	0.00610068	0.00843946	0.00618276		-0.1006	0.00040175	0.00111702	0.00330449	0.00655609	0.00809108	0.00642111		-0.1006	-0.00253746	-0.0034208	-0.00388619	-0.0204836	-0.0126347	-0.00482124		-0.1006	-0.00250016	-0.00218348	-0.00169675	-0.0120652	-0.0129565	-0.00489074
-0.1004	0.000358116	0.000878532	0.00351266	0.00609898	0.00843581	0.0061913		-0.1004	0.00040175	0.00111415	0.00330568	0.0065641	0.00811394	0.00642507		-0.1004	-0.00253811	-0.00342418	-0.00388678	-0.0204853	-0.0126383	-0.00481271		-0.1004	-0.00250016	-0.00218636	-0.00169556	-0.0120572	-0.0129337	-0.00488677
-0.1002	0.000357142	0.000873138	0.0035114	0.00609678	0.00842819	0.00619953		-0.1002	0.000401193	0.0011092	0.00330406	0.00657799	0.00813162	0.00642721		-0.1002	-0.00253908	-0.00342958	-0.00388804	-0.0204875	-0.0126459	-0.00480448		-0.1002	-0.00250072	-0.00219131	-0.00169717	-0.0120433	-0.012916	-0.00488464
-0.1	0.000356113	0.000867886	0.00351031	0.00609418	0.00841996	0.00620745		-0.1	0.000400705	0.00110409	0.00330362	0.00659176	0.00815052	0.00642873		-0.1	-0.00254011	-0.00343483	-0.00388913	-0.0204901	-0.0126542	-0.00479656		-0.1	-0.00250121	-0.00219642	-0.00169761	-0.0120295	-0.0128971	-0.00488312
-0.0998	0.000355571	0.000862348	0.0035083	0.00609169	0.00841142	0.00621324		-0.0998	0.000401123	0.00110053	0.00330161	0.00660386	0.00818039	0.00643117		-0.0998	-0.00254065	-0.00344037	-0.00389115	-0.0204926	-0.0126627	-0.00479076		-0.0998	-0.00250079	-0.00219998	-0.00169963	-0.0120174	-0.0128672	-0.00488068
-0.0996	0.000355301	0.000857962	0.00350619	0.00609007	0.00840045	0.00621172		-0.0996	0.000401471	0.00109839	0.00330035	0.00661454	0.008213	0.0064333		-0.0996	-0.00254093	-0.00344475	-0.00389325	-0.0204943	-0.0126737	-0.00479229		-0.0996	-0.00250044	-0.00220212	-0.00170089	-0.0120067	-0.0128346	-0.00487855
-0.0994	0.000354922	0.000854172	0.00350198	0.00608779	0.00838856	0.00621507		-0.0994	0.000401401	0.00109689	0.00329916	0.00662337	0.00823952	0.00643483		-0.0994	-0.0025413	-0.00344854	-0.00389746	-0.0204965	-0.0126856	-0.00478894		-0.0994	-0.00250051	-0.00220361	-0.00170208	-0.0119979	-0.0128081	-0.00487702
-0.0992	0.000354164	0.000851545	0.00349899	0.00608528	0.00837454	0.00622239		-0.0992	0.00040175	0.00109545	0.00329881	0.00663213	0.00825567	0.00643788		-0.0992	-0.00254206	-0.00345117	-0.00390046	-0.020499	-0.0126996	-0.00478162		-0.0992	-0.00250016	-0.00220506	-0.00170243	-0.0119891	-0.0127919	-0.00487397
-0.099	0.000353622	0.000847899	0.00349637	0.00608156	0.00836113	0.00623214		-0.099	0.000401958	0.0010946	0.00329984	0.00663813	0.00826116	0.00644123		-0.099	-0.0025426	-0.00345482	-0.00390308	-0.0205028	-0.012713	-0.00477187		-0.099	-0.00249995	-0.00220591	-0.00170139	-0.0119831	-0.0127864	-0.00487062
-0.0988	0.000353514	0.00084346	0.00349391	0.00607957	0.00834589	0.00624067		-0.0988	0.000402167	0.00109339	0.00329939	0.00664542	0.00826207	0.00644336		-0.0988	-0.00254271	-0.00345926	-0.00390554	-0.0205047	-0.0127282	-0.00476333		-0.0988	-0.00249974	-0.00220712	-0.00170185	-0.0119758	-0.0127855	-0.00486849
-0.0986	0.000353568	0.000839907	0.00349187	0.00607698	0.00833278	0.00624464		-0.0986	0.000403003	0.00109201	0.00329959	0.00665131	0.00826177	0.00644702		-0.0986	-0.00254266	-0.00346281	-0.00390757	-0.0205073	-0.0127413	-0.00475937		-0.0986	-0.00249891	-0.0022085	-0.00170164	-0.0119699	-0.0127858	-0.00486483
-0.0984	0.000353297	0.000837643	0.00348984	0.00607467	0.00832029	0.00624616		-0.0984	0.000404256	0.00108856	0.00329925	0.00665928	0.00826146	0.00645129		-0.0984	-0.00254293	-0.00346507	-0.0039096	-0.0205096	-0.0127538	-0.00475785		-0.0984	-0.00249766	-0.00221195	-0.00170198	-0.011962	-0.0127861	-0.00486056
-0.0982	0.000353297	0.000836194	0.00348736	0.00607372	0.00830962	0.00624464		-0.0982	0.000405857	0.00108378	0.00329865	0.00666866	0.00826116	0.00645708		-0.0982	-0.00254293	-0.00346652	-0.00391208	-0.0205106	-0.0127645	-0.00475937		-0.0982	-0.00249605	-0.00221673	-0.00170258	-0.0119526	-0.0127864	-0.00485477
-0.098	0.000353135	0.000835177	0.00348577	0.00607281	0.00829773	0.00624342		-0.098	0.000407388	0.00108059	0.00329994	0.00667563	0.00827	0.00646348		-0.098	-0.00254309	-0.00346754	-0.00391367	-0.0205115	-0.0127764	-0.00476059		-0.098	-0.00249452	-0.00221992	-0.0017013	-0.0119456	-0.0127776	-0.00484837
-0.0978	0.000352972	0.000834765	0.00348449	0.00607181	0.00828524	0.00624342		-0.0978	0.000408224	0.0010805	0.00330052	0.0066838	0.00828646	0.00646988		-0.0978	-0.00254325	-0.00346795	-0.00391495	-0.0205125	-0.0127889	-0.00476059		-0.0978	-0.00249369	-0.00222	-0.00170072	-0.0119375	-0.0127611	-0.00484197
-0.0976	0.000352918	0.000833503	0.00348292	0.00607158	0.00827335	0.00624555		-0.0976	0.000408711	0.00108074	0.00330311	0.00669001	0.0083081	0.0064778		-0.0976	-0.00254331	-0.00346921	-0.00391652	-0.0205127	-0.0128008	-0.00475846		-0.0976	-0.0024932	-0.00221977	-0.00169812	-0.0119312	-0.0127395	-0.00483405
-0.0974	0.000352864	0.000831972	0.00348092	0.0060724	0.00826177	0.00624768		-0.0974	0.000410243	0.00108139	0.00330848	0.006698	0.00833309	0.00648451		-0.0974	-0.00254336	-0.00347074	-0.00391852	-0.0205119	-0.0128124	-0.00475632		-0.0974	-0.00249167	-0.00221912	-0.00169275	-0.0119233	-0.0127145	-0.00482734
-0.0972	0.000352593	0.000830603	0.0034784	0.00607322	0.00825019	0.00624921		-0.0972	0.000412192	0.00108271	0.0033129	0.00670544	0.00836113	0.00649213		-0.0972	-0.00254363	-0.00347211	-0.00392104	-0.0205111	-0.0128239	-0.0047548		-0.0972	-0.00248972	-0.0022178	-0.00168833	-0.0119158	-0.0126865	-0.00481972
-0.097	0.00035216	0.000829578	0.00347681	0.00607472	0.00823647	0.00625378		-0.097	0.000415116	0.00108403	0.00331657	0.00671205	0.00839435	0.00649975		-0.097	-0.00254407	-0.00347314	-0.00392263	-0.0205096	-0.0128377	-0.00475023		-0.097	-0.0024868	-0.00221647	-0.00168467	-0.0119092	-0.0126533	-0.0048121
-0.0968	0.000352323	0.000828572	0.00347503	0.00607884	0.00821757	0.00625652		-0.0968	0.000418736	0.00108559	0.0033187	0.00671881	0.00843428	0.00650706		-0.0968	-0.0025439	-0.00347414	-0.00392441	-0.0205055	-0.0128565	-0.00474748		-0.0968	-0.00248318	-0.00221491	-0.00168253	-0.0119024	-0.0126133	-0.00480479
-0.0966	0.000352106	0.000827992	0.00347224	0.00608077	0.0082005	0.00625835		-0.0966	0.000421938	0.00108645	0.00331856	0.00672372	0.00848091	0.00651529		-0.0966	-0.00254412	-0.00347472	-0.0039272	-0.0205036	-0.0128736	-0.00474565		-0.0966	-0.00247997	-0.00221406	-0.00168267	-0.0118975	-0.0125667	-0.00479656
-0.0964	0.000352052	0.000827889	0.00347122	0.00608252	0.00818892	0.00625988		-0.0964	0.000422216	0.00108445	0.00331872	0.00672659	0.00852938	0.00652413		-0.0964	-0.00254417	-0.00347483	-0.00392823	-0.0205018	-0.0128852	-0.00474413		-0.0964	-0.00247969	-0.00221605	-0.00168251	-0.0118947	-0.0125182	-0.00478772
-0.0962	0.000351944	0.000828729	0.0034692	0.00608429	0.00818191	0.00626262		-0.0962	0.000423539	0.00108165	0.00331988	0.00672627	0.0085754	0.00653267		-0.0962	-0.00254428	-0.00347399	-0.00393025	-0.0205	-0.0128922	-0.00474139		-0.0962	-0.00247837	-0.00221885	-0.00168136	-0.011895	-0.0124722	-0.00477918
-0.096	0.000351511	0.000830027	0.00346766	0.00608573	0.00817795	0.00626414		-0.096	0.000426533	0.00107795	0.00332174	0.00672681	0.00861807	0.00653937		-0.096	-0.00254472	-0.00347269	-0.00393178	-0.0204986	-0.0128962	-0.00473986		-0.096	-0.00247538	-0.00222256	-0.0016795	-0.0118944	-0.0124295	-0.00477248
-0.0958	0.000351402	0.00083086	0.00346615	0.00608813	0.00817216	0.00626567		-0.0958	0.000430222	0.00107148	0.00332274	0.00672991	0.00865952	0.0065476		-0.0958	-0.00254482	-0.00347186	-0.00393329	-0.0204962	-0.012902	-0.00473834		-0.0958	-0.00247169	-0.00222903	-0.0016785	-0.0118913	-0.0123881	-0.00476425
-0.0956	0.000351456	0.000830675	0.00346625	0.00608888	0.00816515	0.00626628		-0.0956	0.000433285	0.00106821	0.00332306	0.00673454	0.00869732	0.00655949		-0.0956	-0.00254477	-0.00347204	-0.00393319	-0.0204954	-0.012909	-0.00473773		-0.0956	-0.00246863	-0.0022323	-0.00167817	-0.0118867	-0.0123503	-0.00475236
-0.0954	0.000351402	0.000834048	0.00346635	0.0060904	0.00815966	0.0062675		-0.0954	0.000435026	0.00106309	0.00332405	0.00674047	0.00873207	0.00657808		-0.0954	-0.00254482	-0.00346867	-0.00393309	-0.0204939	-0.0129145	-0.00473651		-0.0954	-0.00246689	-0.00223741	-0.00167719	-0.0118808	-0.0123155	-0.00473377
-0.0952	0.000351565	0.000837879	0.00346667	0.0060908	0.00815326	0.0062675		-0.0952	0.000434747	0.00105344	0.00332377	0.00674709	0.0087659	0.00658814		-0.0952	-0.00254466	-0.00346484	-0.00393277	-0.0204935	-0.0129209	-0.00473651		-0.0952	-0.00246716	-0.00224707	-0.00167747	-0.0118742	-0.0122817	-0.00472371
-0.095	0.000351456	0.00084073	0.00346464	0.00609075	0.00814838	0.0062678		-0.095	0.000435165	0.00104339	0.00332179	0.00675495	0.00879607	0.0065921		-0.095	-0.00254477	-0.00346199	-0.0039348	-0.0204936	-0.0129257	-0.00473621		-0.095	-0.00246675	-0.00225711	-0.00167944	-0.0118663	-0.0122515	-0.00471975
-0.0948	0.00035124	0.000842711	0.00346273	0.00609149	0.00814198	0.00626993		-0.0948	0.000437114	0.00103508	0.00332001	0.00676162	0.00882168	0.00659484		-0.0948	-0.00254499	-0.00346	-0.00393671	-0.0204928	-0.0129321	-0.00473407		-0.0948	-0.0024648	-0.00226543	-0.00168123	-0.0118596	-0.0122259	-0.004717
-0.0946	0.000351294	0.000844393	0.00346133	0.00609235	0.00813375	0.00627085		-0.0946	0.000439133	0.00102941	0.00331604	0.00676883	0.00884575	0.00659942		-0.0946	-0.00254493	-0.00345832	-0.00393811	-0.020492	-0.0129404	-0.00473316		-0.0946	-0.00246278	-0.00227109	-0.0016852	-0.0118524	-0.0122018	-0.00471243
-0.0944	0.000351077	0.000845221	0.0034592	0.00609302	0.00812431	0.00627268		-0.0944	0.000440177	0.00102595	0.00331369	0.00678044	0.00887532	0.00660307		-0.0944	-0.00254515	-0.00345749	-0.00394024	-0.0204913	-0.0129498	-0.00473133		-0.0944	-0.00246173	-0.00227455	-0.00168755	-0.0118408	-0.0121723	-0.00470877
-0.0942	0.000351023	0.000847448	0.00345689	0.00609258	0.00811303	0.0062739		-0.0942	0.000440247	0.00102468	0.00331342	0.00679012	0.00890397	0.00660765		-0.0942	-0.0025452	-0.00345527	-0.00394255	-0.0204917	-0.0129611	-0.00473011		-0.0942	-0.00246166	-0.00227582	-0.00168782	-0.0118311	-0.0121436	-0.0047042
-0.094	0.00035124	0.000850079	0.00345402	0.00609282	0.00809992	0.00627542		-0.094	0.000440177	0.00102561	0.00331287	0.00679618	0.00893049	0.00661405		-0.094	-0.00254499	-0.00345264	-0.00394542	-0.0204915	-0.0129742	-0.00472859		-0.094	-0.00246173	-0.0022749	-0.00168837	-0.0118251	-0.0121171	-0.0046978
-0.0938	0.000351132	0.000852791	0.00345237	0.00609399	0.0080859	0.00627664		-0.0938	0.000439203	0.00102458	0.00331348	0.00679628	0.00894725	0.00662106		-0.0938	-0.00254509	-0.00344992	-0.00394707	-0.0204903	-0.0129882	-0.00472737		-0.0938	-0.00246271	-0.00227593	-0.00168775	-0.011825	-0.0121004	-0.00469079
-0.0936	0.000350861	0.000856088	0.00344915	0.00609309	0.00807066	0.00627694		-0.0936	0.000438715	0.00102056	0.00331593	0.00679723	0.00895304	0.00662715		-0.0936	-0.00254537	-0.00344663	-0.0039503	-0.0204912	-0.0130035	-0.00472706		-0.0936	-0.0024632	-0.00227995	-0.00168531	-0.011824	-0.0120946	-0.0046847
-0.0934	0.000350644	0.000859115	0.00344405	0.00609252	0.00805877	0.00627999		-0.0934	0.000439481	0.00101495	0.00331831	0.00679853	0.00894878	0.00663477		-0.0934	-0.00254558	-0.0034436	-0.00395539	-0.0204918	-0.0130153	-0.00472401		-0.0934	-0.00246243	-0.00228556	-0.00168292	-0.0118227	-0.0120988	-0.00467708
-0.0932	0.000350428	0.000861538	0.00343751	0.00609275	0.00804567	0.00628213		-0.0932	0.000440038	0.00100915	0.00332083	0.00679844	0.00894115	0.006643		-0.0932	-0.0025458	-0.00344118	-0.00396193	-0.0204916	-0.0130285	-0.00472188		-0.0932	-0.00246187	-0.00229136	-0.00168041	-0.0118228	-0.0121064	-0.00466885
-0.093	0.000350049	0.000864064	0.00343149	0.00609112	0.00803256	0.00628578		-0.093	0.000439411	0.00100487	0.00332523	0.00679807	0.00893384	0.00665245		-0.093	-0.00254618	-0.00343865	-0.00396795	-0.0204932	-0.0130416	-0.00471822		-0.093	-0.0024625	-0.00229564	-0.00167601	-0.0118232	-0.0121138	-0.0046594
-0.0928	0.000350373	0.000865493	0.00342571	0.00609199	0.00801915	0.00628731		-0.0928	0.000439342	0.00100155	0.003329	0.00679578	0.00892622	0.00666403		-0.0928	-0.00254585	-0.00343722	-0.00397373	-0.0204923	-0.013055	-0.0047167		-0.0928	-0.00246257	-0.00229896	-0.00167223	-0.0118255	-0.0121214	-0.00464782
-0.0926	0.000350428	0.000868327	0.00341927	0.00609218	0.00800483	0.00628944		-0.0926	0.000440247	0.000999968	0.00333407	0.00679136	0.00891799	0.00667592		-0.0926	-0.0025458	-0.00343439	-0.00398017	-0.0204921	-0.0130693	-0.00471457		-0.0926	-0.00246166	-0.00230054	-0.00166717	-0.0118299	-0.0121296	-0.00463593
-0.0924	0.00035059	0.000871835	0.00341355	0.00609225	0.00799111	0.00629401		-0.0924	0.00044143	0.000999492	0.00333998	0.00678521	0.0089125	0.00668506		-0.0924	-0.00254564	-0.00343088	-0.00398589	-0.0204921	-0.013083	-0.00470999		-0.0924	-0.00246048	-0.00230101	-0.00166126	-0.011836	-0.0121351	-0.00462678
-0.0922	0.000350698	0.000873705	0.00340813	0.00609175	0.00797678	0.00629858		-0.0922	0.000441987	0.000999408	0.00334544	0.00677801	0.00891007	0.0066936		-0.0922	-0.00254553	-0.00342901	-0.00399132	-0.0204926	-0.0130973	-0.00470542		-0.0922	-0.00245992	-0.0023011	-0.00165579	-0.0118432	-0.0121375	-0.00461825
-0.092	0.000350428	0.000877154	0.0034026	0.00609175	0.00796094	0.00630407		-0.092	0.000442335	0.000999014	0.00335056	0.00677314	0.00891433	0.00670457		-0.092	-0.0025458	-0.00342556	-0.00399685	-0.0204926	-0.0131132	-0.00469994		-0.092	-0.00245958	-0.00230149	-0.00165068	-0.0118481	-0.0121333	-0.00460728
-0.0918	0.000350049	0.0008812	0.00339956	0.00609075	0.00794417	0.00630773		-0.0918	0.000442335	0.000998639	0.0033538	0.00677115	0.00892409	0.00671554		-0.0918	-0.00254618	-0.00342152	-0.00399988	-0.0204936	-0.0131299	-0.00469628		-0.0918	-0.00245958	-0.00230187	-0.00164743	-0.0118501	-0.0121235	-0.00459631
-0.0916	0.000349886	0.000884016	0.00339309	0.00608975	0.00792893	0.006312		-0.0916	0.000442962	0.000998259	0.00335711	0.00677217	0.00893689	0.00672377		-0.0916	-0.00254634	-0.0034187	-0.00400635	-0.0204946	-0.0131452	-0.00469201		-0.0916	-0.00245895	-0.00230225	-0.00164413	-0.0118491	-0.0121107	-0.00458808
-0.0914	0.00034994	0.000885841	0.0033885	0.00608822	0.00791369	0.00631687		-0.0914	0.000443101	0.000998331	0.0033607	0.00677188	0.00895396	0.00673292		-0.0914	-0.00254629	-0.00341687	-0.00401094	-0.0204961	-0.0131604	-0.00468713		-0.0914	-0.00245881	-0.00230218	-0.00164054	-0.0118494	-0.0120936	-0.00457893
-0.0912	0.000349994	0.000886684	0.00338376	0.00608588	0.00789784	0.0063184		-0.0912	0.000442753	0.000999828	0.00336298	0.00676948	0.00897011	0.00674084		-0.0912	-0.00254623	-0.00341603	-0.00401569	-0.0204984	-0.0131763	-0.00468561		-0.0912	-0.00245916	-0.00230068	-0.00163825	-0.0118518	-0.0120775	-0.00457101
-0.091	0.00034994	0.000886783	0.00338114	0.00608385	0.00788413	0.00632083		-0.091	0.000442614	0.00100131	0.00336417	0.00676605	0.00898474	0.00674877		-0.091	-0.00254629	-0.00341593	-0.0040183	-0.0205005	-0.01319	-0.00468317		-0.091	-0.0024593	-0.0022992	-0.00163706	-0.0118552	-0.0120629	-0.00456308
-0.0908	0.000350049	0.000884938	0.00337624	0.00608232	0.00787315	0.00632053		-0.0908	0.00044324	0.00100226	0.00336743	0.00676123	0.00900303	0.00675303		-0.0908	-0.00254618	-0.00341778	-0.0040232	-0.020502	-0.013201	-0.00468348		-0.0908	-0.00245867	-0.00229824	-0.0016338	-0.01186	-0.0120446	-0.00455882
-0.0906	0.000350265	0.000882196	0.00337201	0.00608041	0.00785974	0.00631809		-0.0906	0.000444145	0.00100165	0.00336757	0.0067574	0.00902772	0.00675456		-0.0906	-0.00254596	-0.00342052	-0.00402743	-0.0205039	-0.0132144	-0.00468591		-0.0906	-0.00245777	-0.00229886	-0.00163367	-0.0118639	-0.0120199	-0.00455729
-0.0904	0.000350373	0.000882339	0.00336631	0.0060807	0.00784572	0.00631565		-0.0904	0.000444632	0.00100261	0.00336783	0.00675323	0.00905667	0.00675273		-0.0904	-0.00254585	-0.00342038	-0.00403314	-0.0205036	-0.0132284	-0.00468835		-0.0904	-0.00245728	-0.00229789	-0.00163341	-0.011868	-0.0119909	-0.00455912
-0.0902	0.000350373	0.000881292	0.00336086	0.00608107	0.00783262	0.00631382		-0.0902	0.000444981	0.00100402	0.00336729	0.00674828	0.00908593	0.00675273		-0.0902	-0.00254585	-0.00342142	-0.00403858	-0.0205032	-0.0132415	-0.00469018		-0.0902	-0.00245693	-0.00229648	-0.00163395	-0.011873	-0.0119617	-0.00455912
-0.09	0.000350482	0.000878998	0.00335404	0.00607989	0.00781951	0.00631139		-0.09	0.000445189	0.00100582	0.00336629	0.00674426	0.00911611	0.00675425		-0.09	-0.00254574	-0.00342372	-0.0040454	-0.0205044	-0.0132546	-0.00469262		-0.09	-0.00245672	-0.00229469	-0.00163494	-0.011877	-0.0119315	-0.0045576
-0.0898	0.000350157	0.000876448	0.00334669	0.00607889	0.00780549	0.00631017		-0.0898	0.000445398	0.00100697	0.00336613	0.00674175	0.00914445	0.00675821		-0.0898	-0.00254607	-0.00342627	-0.00405275	-0.0205054	-0.0132686	-0.00469384		-0.0898	-0.00245651	-0.00229353	-0.0016351	-0.0118795	-0.0119032	-0.00455363
-0.0896	0.000350049	0.000874821	0.00333833	0.0060778	0.00779452	0.00630742		-0.0896	0.00044505	0.0010066	0.00336165	0.00673864	0.0091731	0.00676279		-0.0896	-0.00254618	-0.00342789	-0.00406111	-0.0205065	-0.0132796	-0.00469658		-0.0896	-0.00245686	-0.00229391	-0.00163959	-0.0118826	-0.0118745	-0.00454906
-0.0894	0.000349778	0.000873266	0.00332951	0.00607909	0.00778446	0.0063062		-0.0894	0.00044512	0.00100556	0.0033654	0.00673534	0.00920023	0.0067701		-0.0894	-0.00254645	-0.00342945	-0.00406993	-0.0205052	-0.0132897	-0.0046978		-0.0894	-0.00245679	-0.00229494	-0.00163583	-0.0118859	-0.0118474	-0.00454175
-0.0892	0.000349561	0.000872121	0.00332178	0.0060789	0.00777227	0.00630468		-0.0892	0.000445468	0.00100484	0.00336972	0.00673292	0.00922675	0.00677925		-0.0892	-0.00254666	-0.00343059	-0.00407766	-0.0205054	-0.0133019	-0.00469933		-0.0892	-0.00245644	-0.00229567	-0.00163151	-0.0118883	-0.0118209	-0.0045326
-0.089	0.000349778	0.000872056	0.00331384	0.00607815	0.00776251	0.00630438		-0.089	0.000445398	0.00100347	0.00337337	0.00673205	0.00924991	0.00678869		-0.089	-0.00254645	-0.00343066	-0.0040856	-0.0205062	-0.0133116	-0.00469963		-0.089	-0.00245651	-0.00229703	-0.00162786	-0.0118892	-0.0117977	-0.00452315
-0.0888	0.000349832	0.000872281	0.00330543	0.00607795	0.00775276	0.00630529		-0.0888	0.000445955	0.00100174	0.00337571	0.00673022	0.00926607	0.00679601		-0.0888	-0.00254639	-0.00343043	-0.00409402	-0.0205064	-0.0133214	-0.00469872		-0.0888	-0.00245596	-0.00229877	-0.00162553	-0.011891	-0.0117815	-0.00451584
-0.0886	0.00034967	0.000871618	0.00329831	0.00607772	0.00774605	0.00630803		-0.0886	0.000447139	0.00100157	0.00337291	0.00672848	0.00928283	0.00680515		-0.0886	-0.00254656	-0.0034311	-0.00410113	-0.0205066	-0.0133281	-0.00469597		-0.0886	-0.00245477	-0.00229894	-0.00162832	-0.0118928	-0.0117648	-0.0045067
-0.0884	0.000349615	0.000870094	0.00329325	0.00607707	0.00774148	0.00630986		-0.0884	0.000447974	0.00100176	0.00336969	0.00672775	0.00929502	0.00681003		-0.0884	-0.00254661	-0.00343262	-0.0041062	-0.0205073	-0.0133326	-0.00469414		-0.0884	-0.00245394	-0.00229875	-0.00163154	-0.0118935	-0.0117526	-0.00450182
-0.0882	0.000349453	0.00086878	0.00328683	0.00607681	0.00773569	0.0063126		-0.0882	0.000448322	0.00100001	0.0033671	0.00672595	0.00929929	0.00681033		-0.0882	-0.00254677	-0.00343394	-0.00411262	-0.0205075	-0.0133384	-0.0046914		-0.0882	-0.00245359	-0.0023005	-0.00163413	-0.0118953	-0.0117483	-0.00450151
-0.088	0.000349724	0.000868206	0.00328081	0.00607698	0.00772716	0.00631352		-0.088	0.000448809	0.000996944	0.0033663	0.00672464	0.00929746	0.00681613		-0.088	-0.0025465	-0.00343451	-0.00411863	-0.0205073	-0.013347	-0.00469049		-0.088	-0.0024531	-0.00230356	-0.00163494	-0.0118966	-0.0117501	-0.00449572
-0.0878	0.000349778	0.000867591	0.00327368	0.00607761	0.00771832	0.0063126		-0.0878	0.000449088	0.000995083	0.0033682	0.00672469	0.00929563	0.00682588		-0.0878	-0.00254645	-0.00343512	-0.00412576	-0.0205067	-0.0133558	-0.0046914		-0.0878	-0.00245282	-0.00230542	-0.00163303	-0.0118966	-0.011752	-0.00448597
-0.0876	0.000349561	0.000867699	0.00326762	0.00607774	0.00770948	0.00631352		-0.0876	0.000449575	0.000993085	0.00336815	0.00672284	0.00929441	0.00683624		-0.0876	-0.00254666	-0.00343502	-0.00413182	-0.0205066	-0.0133646	-0.00469049		-0.0876	-0.00245234	-0.00230742	-0.00163308	-0.0118984	-0.0117532	-0.00447561
-0.0874	0.000349399	0.000868082	0.00326169	0.00607957	0.00770613	0.00631565		-0.0874	0.000449645	0.00099226	0.00336782	0.00672026	0.00929136	0.00684386		-0.0874	-0.00254683	-0.00343463	-0.00413775	-0.0205047	-0.013368	-0.00468835		-0.0874	-0.00245227	-0.00230825	-0.00163341	-0.011901	-0.0117562	-0.00446799
-0.0872	0.000349507	0.000868917	0.00325549	0.00607917	0.00770735	0.00631657		-0.0872	0.000449506	0.000991672	0.00336932	0.00671684	0.00929167	0.00684874		-0.0872	-0.00254672	-0.0034338	-0.00414395	-0.0205051	-0.0133668	-0.00468744		-0.0872	-0.00245241	-0.00230883	-0.00163192	-0.0119044	-0.0117559	-0.00446311
-0.087	0.000349291	0.000869154	0.00324937	0.00607782	0.007711	0.00631657		-0.087	0.000449436	0.000992342	0.00336956	0.00671174	0.00929441	0.00685087		-0.087	-0.00254694	-0.00343356	-0.00415007	-0.0205065	-0.0133631	-0.00468744		-0.087	-0.00245248	-0.00230816	-0.00163167	-0.0119095	-0.0117532	-0.00446098
-0.0868	0.000348641	0.000869266	0.003243	0.00607686	0.00771679	0.00631962		-0.0868	0.000449297	0.000993766	0.00337184	0.00670615	0.00930081	0.00685148		-0.0868	-0.00254758	-0.00343345	-0.00415644	-0.0205075	-0.0133573	-0.00468439		-0.0868	-0.00245261	-0.00230674	-0.0016294	-0.0119151	-0.0117468	-0.00446037
-0.0866	0.000348316	0.000869635	0.00323549	0.00607726	0.00772228	0.00632449		-0.0866	0.000449227	0.000994554	0.00337389	0.00670182	0.00931148	0.00685087		-0.0866	-0.00254791	-0.00343308	-0.00416395	-0.0205071	-0.0133518	-0.00467951		-0.0866	-0.00245268	-0.00230595	-0.00162734	-0.0119194	-0.0117361	-0.00446098
-0.0864	0.000347666	0.000869673	0.00322843	0.00607785	0.00772929	0.00632815		-0.0864	0.000449227	0.000994142	0.00337458	0.00669709	0.00932245	0.00685118		-0.0864	-0.00254856	-0.00343304	-0.00417102	-0.0205065	-0.0133448	-0.00467586		-0.0864	-0.00245268	-0.00230637	-0.00162665	-0.0119242	-0.0117252	-0.00446067
-0.0862	0.00034745	0.000869578	0.00322015	0.00607881	0.007736	0.00632906		-0.0862	0.000449436	0.000992366	0.00337582	0.00669312	0.00932611	0.00685423		-0.0862	-0.00254878	-0.00343314	-0.00417929	-0.0205055	-0.0133381	-0.00467494		-0.0862	-0.00245248	-0.00230814	-0.00162541	-0.0119281	-0.0117215	-0.00445762
-0.086	0.000347287	0.000869627	0.00321194	0.00608078	0.00774362	0.00632541		-0.086	0.000449854	0.000990495	0.00338159	0.00669439	0.00932459	0.00685575		-0.086	-0.00254894	-0.00343309	-0.00418751	-0.0205035	-0.0133305	-0.0046786		-0.086	-0.00245206	-0.00231001	-0.00161964	-0.0119269	-0.011723	-0.0044561
-0.0858	0.000346962	0.000869599	0.00320607	0.00608161	0.0077488	0.00632144		-0.0858	0.000450062	0.000989073	0.00338659	0.00669533	0.00933038	0.00685758		-0.0858	-0.00254926	-0.00343312	-0.00419337	-0.0205027	-0.0133253	-0.00468256		-0.0858	-0.00245185	-0.00231143	-0.00161464	-0.0119259	-0.0117172	-0.00445427
-0.0856	0.0003468	0.000869733	0.00320019	0.00608256	0.00775337	0.00631657		-0.0856	0.000450202	0.000989268	0.0033896	0.00669444	0.00933922	0.00686063		-0.0856	-0.00254943	-0.00343298	-0.00419925	-0.0205018	-0.0133208	-0.00468744		-0.0856	-0.00245171	-0.00231124	-0.00161163	-0.0119268	-0.0117084	-0.00445122
-0.0854	0.000346258	0.000869446	0.00319335	0.00608521	0.00775581	0.006312		-0.0854	0.000450271	0.000988561	0.00339508	0.00668963	0.00935293	0.00686459		-0.0854	-0.00254997	-0.00343327	-0.0042061	-0.0204991	-0.0133183	-0.00469201		-0.0854	-0.00245164	-0.00231195	-0.00160616	-0.0119316	-0.0116947	-0.00444726
-0.0852	0.000345176	0.000869824	0.00318483	0.00608757	0.00775428	0.00630834		-0.0852	0.000449923	0.000989114	0.00340003	0.0066865	0.00936726	0.00686794		-0.0852	-0.00255105	-0.00343289	-0.00421461	-0.0204968	-0.0133198	-0.00469567		-0.0852	-0.00245199	-0.00231139	-0.0016012	-0.0119348	-0.0116803	-0.00444391
-0.085	0.000344363	0.000870354	0.00317749	0.00609665	0.00775154	0.00630407		-0.085	0.000449784	0.000988991	0.00340329	0.00668654	0.00938006	0.00686946		-0.085	-0.00255186	-0.00343236	-0.00422195	-0.0204877	-0.0133226	-0.00469994		-0.085	-0.00245213	-0.00231152	-0.00159795	-0.0119347	-0.0116675	-0.00444238
-0.0848	0.000343822	0.000870895	0.00316929	0.00610729	0.00774484	0.0062995		-0.0848	0.000449366	0.000987414	0.00340805	0.00668755	0.00939256	0.0068716		-0.0848	-0.0025524	-0.00343182	-0.00423015	-0.020477	-0.0133293	-0.00470451		-0.0848	-0.00245254	-0.00231309	-0.00159318	-0.0119337	-0.011655	-0.00444025
-0.0846	0.000343768	0.00087201	0.00316077	0.00611247	0.00773783	0.00629493		-0.0846	0.000449575	0.000985416	0.0034135	0.00668787	0.00940505	0.00687617		-0.0846	-0.00255246	-0.00343071	-0.00423867	-0.0204718	-0.0133363	-0.00470908		-0.0846	-0.00245234	-0.00231509	-0.00158774	-0.0119334	-0.0116426	-0.00443568
-0.0844	0.000343389	0.000873235	0.00315345	0.0061212	0.00772929	0.00628761		-0.0844	0.000449854	0.000983812	0.0034166	0.00668695	0.00941603	0.00688074		-0.0844	-0.00255284	-0.00342948	-0.00424599	-0.0204631	-0.0133448	-0.00471639		-0.0844	-0.00245206	-0.00231669	-0.00158464	-0.0119343	-0.0116316	-0.00443111
-0.0842	0.000343118	0.000873571	0.00314577	0.00613821	0.00771923	0.00627938		-0.0842	0.000449784	0.000982603	0.00341564	0.00668719	0.00942639	0.0068847		-0.0842	-0.00255311	-0.00342914	-0.00425367	-0.0204461	-0.0133549	-0.00472462		-0.0842	-0.00245213	-0.0023179	-0.0015856	-0.0119341	-0.0116212	-0.00442714
-0.084	0.00034301	0.000874286	0.00313837	0.00616706	0.00770917	0.00626902		-0.084	0.000449645	0.000981364	0.00341479	0.00668631	0.00942944	0.00688958		-0.084	-0.00255322	-0.00342843	-0.00426107	-0.0204173	-0.0133649	-0.00473499		-0.084	-0.00245227	-0.00231914	-0.00158645	-0.0119349	-0.0116182	-0.00442227
-0.0838	0.000343118	0.00087483	0.00313058	0.00619684	0.00769912	0.00625104		-0.0838	0.000449436	0.00098137	0.00341259	0.00668495	0.00943949	0.00689354		-0.0838	-0.00255311	-0.00342789	-0.00426886	-0.0203875	-0.013375	-0.00475297		-0.0838	-0.00245248	-0.00231914	-0.00158865	-0.0119363	-0.0116081	-0.00441831
-0.0836	0.000342793	0.000875315	0.00312586	0.00621322	0.00768662	0.00623458		-0.0836	0.000449575	0.000981573	0.00340916	0.0066856	0.00944925	0.00689659		-0.0836	-0.00255343	-0.0034274	-0.00427358	-0.0203711	-0.0133875	-0.00476943		-0.0836	-0.00245234	-0.00231893	-0.00159208	-0.0119357	-0.0115984	-0.00441526
-0.0834	0.000342522	0.000875715	0.00312342	0.00623238	0.00767687	0.00622086		-0.0834	0.000449366	0.000981988	0.00340425	0.00668601	0.00946053	0.00689537		-0.0834	-0.0025537	-0.003427	-0.00427603	-0.0203519	-0.0133973	-0.00478314		-0.0834	-0.00245254	-0.00231852	-0.00159699	-0.0119352	-0.0115871	-0.00441648
-0.0832	0.000342577	0.000875962	0.00312156	0.00625676	0.00766406	0.00620928		-0.0832	0.000449157	0.000982188	0.00339892	0.00669012	0.00947058	0.00689568		-0.0832	-0.00255365	-0.00342675	-0.00427788	-0.0203276	-0.0134101	-0.00479473		-0.0832	-0.00245275	-0.00231832	-0.00160231	-0.0119311	-0.011577	-0.00441617
-0.083	0.000342522	0.000877078	0.00311683	0.00627462	0.00765157	0.00619587		-0.083	0.00044874	0.000981987	0.00339638	0.00669519	0.00948064	0.00689446		-0.083	-0.0025537	-0.00342564	-0.00428261	-0.0203097	-0.0134226	-0.00480814		-0.083	-0.00245317	-0.00231852	-0.00160485	-0.0119261	-0.011567	-0.00441739
-0.0828	0.00034236	0.000878363	0.00310894	0.00628769	0.00764151	0.00618154		-0.0828	0.000448949	0.000980686	0.00339547	0.00669596	0.00948948	0.00689415		-0.0828	-0.00255387	-0.00342435	-0.00429051	-0.0202966	-0.0134326	-0.00482246		-0.0828	-0.00245296	-0.00231982	-0.00160576	-0.0119253	-0.0115581	-0.0044177
-0.0826	0.00034236	0.000879106	0.00310194	0.00629679	0.00763328	0.00616326		-0.0826	0.000449297	0.000979717	0.00339511	0.00669276	0.00950076	0.00689415		-0.0826	-0.00255387	-0.00342361	-0.0042975	-0.0202875	-0.0134408	-0.00484075		-0.0826	-0.00245261	-0.00232079	-0.00160612	-0.0119285	-0.0115468	-0.0044177
-0.0824	0.000342089	0.000878863	0.0030964	0.0063042	0.00762779	0.00614405		-0.0824	0.000449366	0.000979151	0.00339599	0.00669006	0.00951386	0.00689385		-0.0824	-0.00255414	-0.00342385	-0.00430305	-0.0202801	-0.0134463	-0.00485995		-0.0824	-0.00245254	-0.00232136	-0.00160524	-0.0119312	-0.0115337	-0.004418
-0.0822	0.00034171	0.000878795	0.0030939	0.00630401	0.00762475	0.00612729		-0.0822	0.000449366	0.000979525	0.00339794	0.00669025	0.00953002	0.00689598		-0.0822	-0.00255452	-0.00342392	-0.00430554	-0.0202803	-0.0134494	-0.00487672		-0.0822	-0.00245254	-0.00232098	-0.0016033	-0.011931	-0.0115176	-0.00441587
-0.082	0.000341331	0.000879019	0.00309366	0.00631218	0.00762353	0.00611571		-0.082	0.000449854	0.000980498	0.00340153	0.0066915	0.00954556	0.00689873		-0.082	-0.00255489	-0.0034237	-0.00430578	-0.0202721	-0.0134506	-0.0048883		-0.082	-0.00245206	-0.00232001	-0.00159971	-0.0119298	-0.011502	-0.00441312
-0.0818	0.000341006	0.000878939	0.00309383	0.00632231	0.00762444	0.00610534		-0.0818	0.000450341	0.000981517	0.00340673	0.00669378	0.00955989	0.00690055		-0.0818	-0.00255522	-0.00342378	-0.00430562	-0.020262	-0.0134497	-0.00489866		-0.0818	-0.00245157	-0.00231899	-0.00159451	-0.0119275	-0.0114877	-0.0044113
-0.0816	0.000340844	0.000878767	0.00309632	0.00632697	0.0076284	0.00609711		-0.0816	0.000450828	0.00098189	0.00341033	0.00669516	0.00957665	0.00690208		-0.0816	-0.00255538	-0.00342395	-0.00430312	-0.0202574	-0.0134457	-0.00490689		-0.0816	-0.00245108	-0.00231862	-0.00159091	-0.0119261	-0.011471	-0.00440977
-0.0814	0.000341006	0.000878575	0.00309907	0.00633217	0.0076342	0.00608127		-0.0814	0.000451037	0.000981637	0.00341256	0.00669421	0.00959159	0.00690817		-0.0814	-0.00255522	-0.00342414	-0.00430037	-0.0202522	-0.0134399	-0.00492274		-0.0814	-0.00245087	-0.00231887	-0.00158868	-0.011927	-0.011456	-0.00440368
-0.0812	0.000341006	0.000879523	0.00310023	0.00634608	0.00764212	0.0060642		-0.0812	0.000451316	0.00098071	0.00341578	0.00669302	0.00961018	0.00691579		-0.0812	-0.00255522	-0.00342319	-0.00429921	-0.0202382	-0.013432	-0.00493981		-0.0812	-0.0024506	-0.0023198	-0.00158546	-0.0119282	-0.0114374	-0.00439606
-0.081	0.000340952	0.000881737	0.00309884	0.0063706	0.00765248	0.00604652		-0.081	0.000450898	0.00098028	0.00341692	0.0067007	0.00962908	0.00692219		-0.081	-0.00255527	-0.00342098	-0.0043006	-0.0202137	-0.0134216	-0.00495749		-0.081	-0.00245101	-0.00232023	-0.00158431	-0.0119206	-0.0114185	-0.00438965
-0.0808	0.000341277	0.000883763	0.00309776	0.00639597	0.00766498	0.00602671		-0.0808	0.000450898	0.000980393	0.00341697	0.0067166	0.0096498	0.00692981		-0.0808	-0.00255495	-0.00341895	-0.00430168	-0.0201883	-0.0134091	-0.0049773		-0.0808	-0.00245101	-0.00232011	-0.00158426	-0.0119047	-0.0113978	-0.00438203
-0.0806	0.000341602	0.000887017	0.00309664	0.00642032	0.00767717	0.00601025		-0.0806	0.000450689	0.00098033	0.00341739	0.00673504	0.00966931	0.00693713		-0.0806	-0.00255462	-0.0034157	-0.00430281	-0.020164	-0.0133969	-0.00499376		-0.0806	-0.00245122	-0.00232018	-0.00158384	-0.0118862	-0.0113783	-0.00437472
-0.0804	0.000341873	0.000891443	0.00309555	0.00643344	0.00768967	0.00599257		-0.0804	0.000451664	0.000979406	0.00341746	0.00674986	0.00968455	0.00695237		-0.0804	-0.00255435	-0.00341127	-0.00430389	-0.0201509	-0.0133845	-0.00501144		-0.0804	-0.00245025	-0.0023211	-0.00158377	-0.0118714	-0.0113631	-0.00435948
-0.0802	0.000341602	0.000893571	0.00309318	0.00643771	0.0077046	0.00597154		-0.0802	0.000453126	0.000978266	0.0034161	0.0067605	0.00970009	0.00697584		-0.0802	-0.00255462	-0.00340914	-0.00430627	-0.0201466	-0.0133695	-0.00503247		-0.0802	-0.00244879	-0.00232224	-0.00158514	-0.0118608	-0.0113475	-0.00433601
-0.08	0.000341656	0.000894981	0.00308818	0.00644222	0.00771893	0.0059502		-0.08	0.000453334	0.000976015	0.00341569	0.00678492	0.00971442	0.00699687		-0.08	-0.00255457	-0.00340773	-0.00431126	-0.0201421	-0.0133552	-0.0050538		-0.08	-0.00244858	-0.00232449	-0.00158555	-0.0118363	-0.0113332	-0.00431498
-0.0798	0.00034171	0.000898216	0.00308169	0.00644788	0.00773234	0.00593161		-0.0798	0.000453474	0.000974652	0.00341402	0.00681655	0.00972692	0.00701302		-0.0798	-0.00255452	-0.0034045	-0.00431775	-0.0201364	-0.0133418	-0.00507239		-0.0798	-0.00244844	-0.00232585	-0.00158722	-0.0118047	-0.0113207	-0.00429883
-0.0796	0.000342089	0.000902128	0.00307387	0.00645571	0.00774484	0.00591271		-0.0796	0.000453404	0.000973967	0.00341154	0.00684703	0.0097388	0.00702979		-0.0796	-0.00255414	-0.00340059	-0.00432557	-0.0201286	-0.0133293	-0.00509129		-0.0796	-0.00244851	-0.00232654	-0.00158969	-0.0117742	-0.0113088	-0.00428206
-0.0794	0.000342198	0.000906948	0.00306606	0.00646791	0.00775733	0.00589138		-0.0794	0.000454657	0.000974094	0.0034076	0.0068739	0.00975069	0.00705204		-0.0794	-0.00255403	-0.00339577	-0.00433338	-0.0201164	-0.0133168	-0.00511263		-0.0794	-0.00244725	-0.00232641	-0.00159363	-0.0117474	-0.0112969	-0.00425981
-0.0792	0.000342089	0.000912058	0.00306052	0.00648828	0.00776739	0.00586425		-0.0792	0.000455353	0.000974368	0.00340502	0.00688942	0.00976471	0.00706728		-0.0792	-0.00255414	-0.00339066	-0.00433892	-0.020096	-0.0133067	-0.00513975		-0.0792	-0.00244656	-0.00232614	-0.00159621	-0.0117318	-0.0112829	-0.00424457
-0.079	0.000342035	0.000916249	0.00305422	0.00650641	0.00777897	0.00583286		-0.079	0.000455841	0.000974044	0.00340148	0.00689669	0.00978147	0.00707551		-0.079	-0.00255419	-0.00338647	-0.00434523	-0.0200779	-0.0132951	-0.00517115		-0.079	-0.00244607	-0.00232646	-0.00159976	-0.0117246	-0.0112661	-0.00423634
-0.0788	0.000342306	0.000918636	0.00304776	0.00652167	0.00778812	0.00579933		-0.0788	0.000456746	0.00097295	0.00339647	0.00690423	0.00979946	0.00707977		-0.0788	-0.00255392	-0.00338408	-0.00435168	-0.0200626	-0.013286	-0.00520468		-0.0788	-0.00244517	-0.00232756	-0.00160476	-0.011717	-0.0112481	-0.00423208
-0.0786	0.000343172	0.000920938	0.00304202	0.00654054	0.00779452	0.00576946		-0.0786	0.000457651	0.000971416	0.00339281	0.00691106	0.0098211	0.00708313		-0.0786	-0.00255305	-0.00338178	-0.00435742	-0.0200438	-0.0132796	-0.00523455		-0.0786	-0.00244426	-0.00232909	-0.00160842	-0.0117102	-0.0112265	-0.00422872
-0.0784	0.000344147	0.000923914	0.0030354	0.00657134	0.0077997	0.00574904		-0.0784	0.000459461	0.000970468	0.00338803	0.00692642	0.00983786	0.0070877		-0.0784	-0.00255208	-0.0033788	-0.00436404	-0.020013	-0.0132744	-0.00525497		-0.0784	-0.00244245	-0.00233004	-0.00161321	-0.0116948	-0.0112097	-0.00422415
-0.0782	0.000345771	0.000926425	0.00302922	0.00660019	0.00780488	0.00573624		-0.0782	0.000459321	0.000970545	0.00338373	0.00694375	0.00984944	0.00709014		-0.0782	-0.00255045	-0.00337629	-0.00437023	-0.0199841	-0.0132692	-0.00526777		-0.0782	-0.00244259	-0.00232996	-0.0016175	-0.0116775	-0.0111982	-0.00422171
-0.078	0.000346475	0.000929784	0.00302456	0.00663126	0.00781524	0.00572527		-0.078	0.000463777	0.000971065	0.00338095	0.00696277	0.00986255	0.00709471		-0.078	-0.00254975	-0.00337293	-0.00437489	-0.0199531	-0.0132589	-0.00527874		-0.078	-0.00243813	-0.00232944	-0.00162029	-0.0116585	-0.0111851	-0.00421714
-0.0778	0.000346367	0.000933672	0.0030203	0.00665106	0.00782865	0.00571185		-0.0778	0.000470042	0.000973126	0.00338162	0.00697772	0.00987444	0.00709684		-0.0778	-0.00254986	-0.00336904	-0.00437914	-0.0199333	-0.0132455	-0.00529215		-0.0778	-0.00243187	-0.00232738	-0.00161961	-0.0116435	-0.0111732	-0.00421501
-0.0776	0.000345825	0.000936607	0.00301774	0.00666187	0.00784572	0.00569844		-0.0776	0.00047408	0.00097699	0.00338042	0.00698438	0.00988907	0.00709684		-0.0776	-0.0025504	-0.00336611	-0.00438171	-0.0199224	-0.0132284	-0.00530556		-0.0776	-0.00242783	-0.00232352	-0.00162081	-0.0116369	-0.0111585	-0.00421501
-0.0774	0.000345825	0.000940577	0.00301581	0.00667018	0.00785913	0.00568351		-0.0774	0.000474637	0.000979603	0.00337737	0.00700269	0.00990796	0.00709837		-0.0774	-0.0025504	-0.00336214	-0.00438363	-0.0199141	-0.013215	-0.0053205		-0.0774	-0.00242727	-0.0023209	-0.00162387	-0.0116186	-0.0111396	-0.00421348
-0.0772	0.000345717	0.000945599	0.00301498	0.00667757	0.00786828	0.00566674		-0.0772	0.000477769	0.000981484	0.00337364	0.00702633	0.00992839	0.00710751		-0.0772	-0.00255051	-0.00335712	-0.00438446	-0.0199068	-0.0132058	-0.00533726		-0.0772	-0.00242414	-0.00231902	-0.0016276	-0.0115949	-0.0111192	-0.00420434
-0.077	0.000346042	0.000949312	0.00301488	0.00669454	0.00787193	0.00565425		-0.077	0.000482225	0.000984319	0.00337314	0.00704985	0.00995064	0.00711239		-0.077	-0.00255018	-0.0033534	-0.00438456	-0.0198898	-0.0132022	-0.00534976		-0.077	-0.00241969	-0.00231619	-0.00162809	-0.0115714	-0.011097	-0.00419946
-0.0768	0.000346637	0.000950464	0.00301935	0.00671498	0.00787742	0.00564297		-0.0768	0.000485984	0.000985818	0.0033712	0.00706969	0.00997045	0.00711086		-0.0768	-0.00254959	-0.00335225	-0.00438009	-0.0198693	-0.0131967	-0.00536104		-0.0768	-0.00241593	-0.00231469	-0.00163003	-0.0115516	-0.0110772	-0.00420099
-0.0766	0.000347341	0.000953649	0.0030229	0.00672598	0.00788291	0.00563474		-0.0766	0.000487376	0.000991197	0.00337351	0.00708632	0.0099866	0.00710477		-0.0766	-0.00254888	-0.00334907	-0.00437655	-0.0198583	-0.0131912	-0.00536926		-0.0766	-0.00241453	-0.00230931	-0.00162773	-0.0115349	-0.011061	-0.00420708
-0.0764	0.00034772	0.000956997	0.00302271	0.00674163	0.007889	0.00562895		-0.0764	0.00048842	0.000998497	0.00337581	0.0070997	0.0100058	0.00710385		-0.0764	-0.00254851	-0.00334572	-0.00437673	-0.0198427	-0.0131851	-0.00537506		-0.0764	-0.00241349	-0.00230201	-0.00162543	-0.0115216	-0.0110418	-0.004208
-0.0762	0.000348262	0.000959754	0.00302407	0.00676013	0.00789449	0.00562316		-0.0762	0.000488212	0.00100599	0.00337795	0.00710911	0.0100284	0.00710507		-0.0762	-0.00254796	-0.00334296	-0.00437537	-0.0198242	-0.0131796	-0.00538085		-0.0762	-0.0024137	-0.00229452	-0.00162328	-0.0115121	-0.0110192	-0.00420678
-0.076	0.000348803	0.000962076	0.00302444	0.00678171	0.00789998	0.00561615		-0.076	0.000487794	0.00101409	0.00338312	0.00711557	0.0100579	0.00710873		-0.076	-0.00254742	-0.00334064	-0.004375	-0.0198026	-0.0131741	-0.00538786		-0.076	-0.00241412	-0.00228641	-0.00161812	-0.0115057	-0.0109897	-0.00420312
-0.0758	0.000348912	0.000964235	0.00302487	0.00680008	0.00790485	0.00561005		-0.0758	0.000487655	0.00102172	0.00338473	0.00712267	0.0100942	0.007113		-0.0758	-0.00254731	-0.00333848	-0.00437457	-0.0197842	-0.0131693	-0.00539395		-0.0758	-0.00241426	-0.00227879	-0.00161651	-0.0114986	-0.0109534	-0.00419885
-0.0756	0.000348695	0.000965758	0.00302573	0.00682317	0.00791125	0.00560335		-0.0756	0.000487724	0.00102511	0.0033878	0.00712554	0.0101308	0.00711574		-0.0756	-0.00254753	-0.00333696	-0.00437372	-0.0197611	-0.0131629	-0.00540066		-0.0756	-0.00241419	-0.0022754	-0.00161343	-0.0114957	-0.0109168	-0.00419611
-0.0754	0.00034902	0.000966463	0.00302625	0.00685469	0.00791857	0.00559786		-0.0754	0.000488351	0.001029	0.00339113	0.00713049	0.0101655	0.00711757		-0.0754	-0.00254721	-0.00333625	-0.00437319	-0.0197296	-0.0131556	-0.00540615		-0.0754	-0.00241356	-0.00227151	-0.00161011	-0.0114908	-0.0108821	-0.00419428
-0.0752	0.000349236	0.000967339	0.00302849	0.00689296	0.00793107	0.00559268		-0.0752	0.000489186	0.00103842	0.00339268	0.0071364	0.0101942	0.00711757		-0.0752	-0.00254699	-0.00333538	-0.00437095	-0.0196914	-0.0131431	-0.00541133		-0.0752	-0.00241272	-0.00226209	-0.00160856	-0.0114849	-0.0108534	-0.00419428
-0.075	0.000349507	0.000968541	0.00303021	0.00691606	0.00794478	0.00558628		-0.075	0.000489952	0.0010481	0.0033938	0.00714433	0.0102152	0.00711635		-0.075	-0.00254672	-0.00333417	-0.00436923	-0.0196683	-0.0131293	-0.00541773		-0.075	-0.00241196	-0.00225241	-0.00160744	-0.0114769	-0.0108324	-0.0041955
-0.0748	0.000349128	0.000970262	0.00303053	0.00695751	0.0079585	0.00558171		-0.0748	0.000490022	0.00105495	0.00339244	0.00715388	0.0102332	0.00711818		-0.0748	-0.0025471	-0.00333245	-0.00436891	-0.0196268	-0.0131156	-0.0054223		-0.0748	-0.00241189	-0.00224556	-0.0016088	-0.0114674	-0.0108144	-0.00419367
-0.0746	0.00034902	0.000972063	0.00303174	0.0070046	0.00797252	0.00558049		-0.0746	0.000489952	0.00105882	0.00338728	0.0071612	0.0102512	0.00712153		-0.0746	-0.00254721	-0.00333065	-0.0043677	-0.0195797	-0.0131016	-0.00542352		-0.0746	-0.00241196	-0.00224169	-0.00161395	-0.0114601	-0.0107964	-0.00419032
-0.0744	0.000349128	0.000972172	0.00303304	0.00704547	0.00798684	0.00557866		-0.0744	0.000489604	0.0010616	0.00338295	0.00716939	0.010271	0.00712549		-0.0744	-0.0025471	-0.00333054	-0.0043664	-0.0195388	-0.0130873	-0.00542535		-0.0744	-0.00241231	-0.00223891	-0.00161829	-0.0114519	-0.0107766	-0.00418636
-0.0742	0.000349615	0.000972243	0.00303321	0.00707585	0.00800239	0.00557774		-0.0742	0.000488838	0.00106362	0.00337825	0.00717518	0.0102917	0.00713098		-0.0742	-0.00254661	-0.00333047	-0.00436623	-0.0195085	-0.0130717	-0.00542626		-0.0742	-0.00241307	-0.00223688	-0.00162298	-0.0114461	-0.0107559	-0.00418087
-0.074	0.000349561	0.000973198	0.00303367	0.00709902	0.00801763	0.00557835		-0.074	0.000488072	0.00106367	0.00337257	0.00718447	0.0103179	0.00713677		-0.074	-0.00254666	-0.00332952	-0.00436577	-0.0194853	-0.0130565	-0.00542565		-0.074	-0.00241384	-0.00223683	-0.00162866	-0.0114368	-0.0107297	-0.00417508
-0.0738	0.000349561	0.000973828	0.00303803	0.00711554	0.00803256	0.00557805		-0.0738	0.000487446	0.00106463	0.00337022	0.00719398	0.010345	0.00714226		-0.0738	-0.00254666	-0.00332889	-0.00436141	-0.0194688	-0.0130416	-0.00542596		-0.0738	-0.00241447	-0.00223588	-0.00163102	-0.0114273	-0.0107026	-0.00416959
-0.0736	0.000349236	0.000975297	0.00304265	0.00713894	0.00804597	0.00557835		-0.0736	0.000487933	0.00106769	0.00336786	0.00720079	0.0103725	0.00714591		-0.0736	-0.00254699	-0.00332742	-0.00435679	-0.0194454	-0.0130281	-0.00542565		-0.0736	-0.00241398	-0.00223282	-0.00163338	-0.0114205	-0.0106751	-0.00416594
-0.0734	0.000349615	0.00097744	0.00304922	0.00716202	0.00805573	0.00557653		-0.0734	0.000488351	0.00107182	0.00336392	0.00720256	0.0104005	0.00714683		-0.0734	-0.00254661	-0.00332528	-0.00435022	-0.0194223	-0.0130184	-0.00542748		-0.0734	-0.00241356	-0.00222869	-0.00163731	-0.0114187	-0.0106471	-0.00416502
-0.0732	0.000350049	0.000980251	0.0030561	0.00717787	0.00806213	0.00557622		-0.0732	0.000487655	0.00107369	0.00335764	0.00720731	0.010427	0.0071453		-0.0732	-0.00254618	-0.00332246	-0.00434335	-0.0194064	-0.013012	-0.00542779		-0.0732	-0.00241426	-0.00222682	-0.00164359	-0.0114139	-0.0106206	-0.00416654
-0.073	0.000350428	0.000981542	0.00306443	0.00719126	0.00806944	0.00557348		-0.073	0.000486123	0.00107443	0.00335165	0.0072146	0.0104529	0.00714439		-0.073	-0.0025458	-0.00332117	-0.00433501	-0.0193931	-0.0130047	-0.00543053		-0.073	-0.00241579	-0.00222608	-0.00164959	-0.0114067	-0.0105947	-0.00416746
-0.0728	0.000350915	0.000983159	0.00307314	0.00720303	0.0080734	0.00557165		-0.0728	0.000485218	0.00107581	0.00334331	0.00722648	0.0104767	0.00714561		-0.0728	-0.00254531	-0.00331956	-0.0043263	-0.0193813	-0.0130007	-0.00543236		-0.0728	-0.00241669	-0.0022247	-0.00165793	-0.0113948	-0.0105709	-0.00416624
-0.0726	0.000350644	0.000985734	0.0030805	0.00721745	0.00807859	0.00557073		-0.0726	0.000484731	0.00107771	0.00333528	0.00723462	0.0104977	0.00714591		-0.0726	-0.00254558	-0.00331698	-0.00431894	-0.0193669	-0.0129955	-0.00543327		-0.0726	-0.00241718	-0.00222279	-0.00166596	-0.0113866	-0.0105499	-0.00416594
-0.0724	0.000349615	0.000988702	0.00308551	0.00723366	0.00808407	0.00557043		-0.0724	0.000484313	0.00107896	0.00332907	0.0072396	0.0105172	0.00714561		-0.0724	-0.00254661	-0.00331401	-0.00431393	-0.0193507	-0.01299	-0.00543358		-0.0724	-0.0024176	-0.00222155	-0.00167217	-0.0113817	-0.0105304	-0.00416624
-0.0722	0.000349128	0.000991227	0.00309209	0.00724591	0.00808773	0.00557012		-0.0722	0.000484035	0.00108077	0.0033244	0.00724589	0.0105374	0.00714408		-0.0722	-0.0025471	-0.00331149	-0.00430736	-0.0193384	-0.0129864	-0.00543388		-0.0722	-0.00241788	-0.00221974	-0.00167683	-0.0113754	-0.0105102	-0.00416776
-0.072	0.000349778	0.000993317	0.00309932	0.00726054	0.00808895	0.00556982		-0.072	0.000483895	0.00108251	0.00332053	0.00725138	0.0105569	0.00713951		-0.072	-0.00254645	-0.0033094	-0.00430012	-0.0193238	-0.0129852	-0.00543419		-0.072	-0.00241802	-0.002218	-0.00168071	-0.0113699	-0.0104907	-0.00417234
-0.0718	0.000350752	0.000995492	0.00310676	0.00727258	0.00809108	0.00556952		-0.0718	0.000484313	0.0010845	0.00331682	0.00725899	0.0105764	0.00713525		-0.0718	-0.00254547	-0.00330722	-0.00429268	-0.0193117	-0.012983	-0.00543449		-0.0718	-0.0024176	-0.002216	-0.00168441	-0.0113623	-0.0104712	-0.0041766
-0.0716	0.000351456	0.000997185	0.00311762	0.00728456	0.00809413	0.00556738		-0.0716	0.000484522	0.00108497	0.00331648	0.00727244	0.0105925	0.00712945		-0.0716	-0.00254477	-0.00330553	-0.00428182	-0.0192998	-0.01298	-0.00543662		-0.0716	-0.00241739	-0.00221553	-0.00168476	-0.0113488	-0.0104551	-0.00418239
-0.0714	0.000351565	0.000998382	0.00312802	0.00729825	0.00809748	0.00556372		-0.0714	0.000485079	0.00108515	0.003319	0.00728695	0.0106038	0.00712366		-0.0714	-0.00254466	-0.00330433	-0.00427142	-0.0192861	-0.0129766	-0.00544028		-0.0714	-0.00241683	-0.00221536	-0.00168224	-0.0113343	-0.0104438	-0.00418819
-0.0712	0.000351944	0.000999376	0.00313878	0.00731448	0.00810145	0.00556068		-0.0712	0.000485288	0.00108726	0.00332368	0.00729607	0.0106169	0.00711726		-0.0712	-0.00254428	-0.00330334	-0.00426067	-0.0192698	-0.0129727	-0.00544333		-0.0712	-0.00241662	-0.00221325	-0.00167756	-0.0113252	-0.0104307	-0.00419459
-0.071	0.00035189	0.00100093	0.00314831	0.00733654	0.00810693	0.00555885		-0.071	0.00048487	0.00108705	0.00332582	0.00730002	0.0106337	0.00711239		-0.071	-0.00254434	-0.00330179	-0.00425114	-0.0192478	-0.0129672	-0.00544516		-0.071	-0.00241704	-0.00221346	-0.00167541	-0.0113212	-0.0104139	-0.00419946
-0.0708	0.000352269	0.00100194	0.00315766	0.00735995	0.00811333	0.00555732		-0.0708	0.000485079	0.00108453	0.00332993	0.00730232	0.0106529	0.0071072		-0.0708	-0.00254396	-0.00330077	-0.00424178	-0.0192244	-0.0129608	-0.00544668		-0.0708	-0.00241683	-0.00221597	-0.00167131	-0.0113189	-0.0103947	-0.00420464
-0.0706	0.000353135	0.00100168	0.00316518	0.00738926	0.00811943	0.00555824		-0.0706	0.000485914	0.0010837	0.00333065	0.00730717	0.0106721	0.00710172		-0.0706	-0.00254309	-0.00330103	-0.00423426	-0.0191951	-0.0129547	-0.00544577		-0.0706	-0.002416	-0.00221681	-0.00167058	-0.0113141	-0.0103755	-0.00421013
-0.0704	0.000353839	0.00100347	0.00317233	0.00741782	0.00812949	0.00556037		-0.0704	0.000486541	0.00108277	0.00332983	0.00731276	0.0106873	0.00709715		-0.0704	-0.00254239	-0.00329924	-0.00422711	-0.0191665	-0.0129446	-0.00544363		-0.0704	-0.00241537	-0.00221774	-0.0016714	-0.0113085	-0.0103603	-0.0042147
-0.0702	0.000354651	0.00100541	0.00317759	0.00744463	0.00814137	0.00556311		-0.0702	0.000487515	0.00108321	0.00333008	0.00731989	0.0107017	0.00709105		-0.0702	-0.00254157	-0.00329731	-0.00422186	-0.0191397	-0.0129327	-0.00544089		-0.0702	-0.0024144	-0.00221729	-0.00167116	-0.0113014	-0.010346	-0.0042208
-0.07	0.000354705	0.00100361	0.00318259	0.00746821	0.00815265	0.00556586		-0.07	0.000489117	0.00108515	0.00333058	0.00732633	0.0107166	0.00708495		-0.07	-0.00254152	-0.00329911	-0.00421685	-0.0191161	-0.0129215	-0.00543815		-0.07	-0.00241279	-0.00221536	-0.00167065	-0.0112949	-0.010331	-0.00422689
-0.0698	0.000354813	0.00100243	0.00318669	0.00748655	0.00816515	0.00556677		-0.0698	0.00049218	0.00108771	0.00333259	0.00733273	0.0107343	0.0070816		-0.0698	-0.00254141	-0.00330028	-0.00421276	-0.0190978	-0.012909	-0.00543723		-0.0698	-0.00240973	-0.0022128	-0.00166865	-0.0112885	-0.0103133	-0.00423025
-0.0696	0.00035503	0.00100428	0.00319287	0.00750669	0.00817795	0.00557134		-0.0696	0.000494477	0.00109161	0.00333551	0.00734392	0.0107504	0.00708221		-0.0696	-0.0025412	-0.00329844	-0.00420657	-0.0190776	-0.0128962	-0.00543266		-0.0696	-0.00240743	-0.00220889	-0.00166572	-0.0112773	-0.0102972	-0.00422964
-0.0694	0.000354597	0.00100691	0.00320206	0.00754091	0.00819136	0.00557592		-0.0694	0.000494338	0.00109477	0.00333753	0.00735026	0.0107593	0.00708892		-0.0694	-0.00254163	-0.0032958	-0.00419738	-0.0190434	-0.0128828	-0.00542809		-0.0694	-0.00240757	-0.00220573	-0.0016637	-0.011271	-0.0102883	-0.00422293
-0.0692	0.000354813	0.00100837	0.00321387	0.00758124	0.00820599	0.00558171		-0.0692	0.000495591	0.00109431	0.00333992	0.00737264	0.0107626	0.00709593		-0.0692	-0.00254141	-0.00329434	-0.00418557	-0.0190031	-0.0128681	-0.0054223		-0.0692	-0.00240632	-0.0022062	-0.00166132	-0.0112486	-0.010285	-0.00421592
-0.069	0.000355355	0.00100992	0.00322513	0.00761898	0.00821574	0.00558445		-0.069	0.000498654	0.00109168	0.00334138	0.00740414	0.0107672	0.00709867		-0.069	-0.00254087	-0.00329279	-0.00417431	-0.0189653	-0.0128584	-0.00541956		-0.069	-0.00240326	-0.00220882	-0.00165985	-0.0112171	-0.0102804	-0.00421318
-0.0688	0.000355517	0.0010124	0.00323753	0.00764928	0.00822397	0.00558811		-0.0688	0.000500534	0.00109	0.00334037	0.00742347	0.0107718	0.00709318		-0.0688	-0.00254071	-0.00329032	-0.00416192	-0.018935	-0.0128501	-0.0054159		-0.0688	-0.00240138	-0.00221051	-0.00166087	-0.0111978	-0.0102759	-0.00421866
-0.0686	0.000355734	0.00101303	0.00324836	0.00767491	0.00823068	0.00559329		-0.0686	0.000500046	0.00108952	0.00333701	0.00743568	0.0107833	0.00708617		-0.0686	-0.00254049	-0.00328969	-0.00415108	-0.0189094	-0.0128434	-0.00541072		-0.0686	-0.00240186	-0.00221099	-0.00166422	-0.0111856	-0.0102643	-0.00422568
-0.0684	0.000356492	0.00101297	0.00325918	0.00770954	0.00823403	0.00559725		-0.0684	0.000502135	0.00109011	0.00333644	0.0074541	0.010808	0.00708008		-0.0684	-0.00253973	-0.00328975	-0.00414026	-0.0188748	-0.0128401	-0.00540675		-0.0684	-0.00239978	-0.00221039	-0.0016648	-0.0111672	-0.0102396	-0.00423177
-0.0682	0.000357142	0.00101227	0.00326759	0.00774108	0.0082386	0.00560304		-0.0682	0.000505894	0.0010916	0.00333681	0.00747457	0.0108294	0.00707459		-0.0682	-0.00253908	-0.00329044	-0.00413185	-0.0188432	-0.0128355	-0.00540096		-0.0682	-0.00239602	-0.00220891	-0.00166443	-0.0111467	-0.0102182	-0.00423726
-0.068	0.000357737	0.00101203	0.00327599	0.0077669	0.00823982	0.00560944		-0.068	0.000509653	0.00109322	0.00333209	0.00749597	0.0108376	0.00707459		-0.068	-0.00253849	-0.00329068	-0.00412345	-0.0188174	-0.0128343	-0.00539456		-0.068	-0.00239226	-0.00220729	-0.00166915	-0.0111253	-0.01021	-0.00423726
-0.0678	0.000358008	0.00101382	0.00328495	0.00779752	0.0082386	0.00561554		-0.0678	0.00051209	0.00109459	0.00332692	0.00751409	0.0108419	0.00707703		-0.0678	-0.00253822	-0.0032889	-0.0041145	-0.0187868	-0.0128355	-0.00538847		-0.0678	-0.00238982	-0.00220591	-0.00167431	-0.0111072	-0.0102057	-0.00423482
-0.0676	0.000357683	0.00101488	0.00329068	0.00783091	0.00823647	0.00562133		-0.0676	0.000512786	0.00109641	0.00332295	0.00752728	0.0108589	0.00707794		-0.0676	-0.00253854	-0.00328784	-0.00410876	-0.0187534	-0.0128377	-0.00538268		-0.0676	-0.00238913	-0.00220409	-0.00167829	-0.011094	-0.0101887	-0.0042339
-0.0674	0.000357683	0.00101637	0.00329673	0.00786726	0.00823434	0.00562712		-0.0674	0.000513621	0.00109886	0.00332027	0.00753908	0.0108848	0.00707307		-0.0674	-0.00253854	-0.00328634	-0.00410271	-0.0187171	-0.0128398	-0.00537688		-0.0674	-0.00238829	-0.00220165	-0.00168096	-0.0110822	-0.0101628	-0.00423878
-0.0672	0.000357846	0.00101856	0.00330309	0.00790367	0.00823129	0.00563474		-0.0672	0.000514874	0.00110144	0.00331708	0.0075502	0.0109162	0.00706941		-0.0672	-0.00253838	-0.00328415	-0.00409636	-0.0186807	-0.0128428	-0.00536926		-0.0672	-0.00238704	-0.00219906	-0.00168415	-0.0110711	-0.0101314	-0.00424244
-0.067	0.000357575	0.00102106	0.0033101	0.00793545	0.00822946	0.00564358		-0.067	0.000516197	0.00110417	0.00331884	0.00755995	0.0109501	0.00706972		-0.067	-0.00253865	-0.00328165	-0.00408934	-0.0186489	-0.0128447	-0.00536043		-0.067	-0.00238571	-0.00219634	-0.0016824	-0.0110613	-0.0100975	-0.00424213
-0.0668	0.000357142	0.00102471	0.0033151	0.00796172	0.00823373	0.00565425		-0.0668	0.000517172	0.00110691	0.00331707	0.00757044	0.0109796	0.00706545		-0.0668	-0.00253908	-0.00327801	-0.00408434	-0.0186226	-0.0128404	-0.00534976		-0.0668	-0.00238474	-0.0021936	-0.00168417	-0.0110508	-0.010068	-0.0042464
-0.0666	0.000356871	0.00102801	0.00332004	0.00798251	0.00823556	0.00566614		-0.0666	0.000517102	0.00110887	0.00331581	0.00758277	0.0110055	0.00705874		-0.0666	-0.00253935	-0.0032747	-0.00407941	-0.0186018	-0.0128386	-0.00533787		-0.0666	-0.00238481	-0.00219164	-0.00168543	-0.0110385	-0.0100421	-0.00425311
-0.0664	0.000357033	0.00103071	0.00332405	0.00800448	0.00823068	0.00567528		-0.0664	0.000518285	0.00110994	0.00331436	0.00759646	0.0110327	0.00705204		-0.0664	-0.00253919	-0.003272	-0.00407539	-0.0185798	-0.0128434	-0.00532873		-0.0664	-0.00238363	-0.00219057	-0.00168687	-0.0110248	-0.0100149	-0.00425981
-0.0662	0.000356871	0.00103508	0.00332925	0.00802168	0.0082258	0.00568473		-0.0662	0.000519399	0.00111084	0.00331168	0.00761056	0.0110583	0.00704625		-0.0662	-0.00253935	-0.00326764	-0.00407019	-0.0185626	-0.0128483	-0.00531928		-0.0662	-0.00238251	-0.00218966	-0.00168955	-0.0110107	-0.00998934	-0.0042656
-0.066	0.000356871	0.00103661	0.00333576	0.00805201	0.00822032	0.00569418		-0.066	0.000520513	0.00111086	0.00330781	0.00761867	0.011086	0.00704289		-0.066	-0.00253935	-0.00326611	-0.00406368	-0.0185323	-0.0128538	-0.00530983		-0.066	-0.0023814	-0.00218964	-0.00169343	-0.0110026	-0.00996161	-0.00426896
-0.0658	0.000356384	0.00103842	0.00334142	0.00808773	0.00821666	0.00570241		-0.0658	0.000521348	0.00111057	0.00330155	0.00762382	0.0111125	0.00704381		-0.0658	-0.00253984	-0.0032643	-0.00405802	-0.0184966	-0.0128575	-0.0053016		-0.0658	-0.00238056	-0.00218994	-0.00169968	-0.0109974	-0.00993509	-0.00426804
-0.0656	0.00035595	0.00104274	0.00334929	0.00813292	0.0082127	0.00570881		-0.0656	0.000521697	0.00111065	0.00329791	0.00763515	0.0111375	0.00704777		-0.0656	-0.00254028	-0.00325998	-0.00405015	-0.0184514	-0.0128614	-0.0052952		-0.0656	-0.00238021	-0.00218985	-0.00170333	-0.0109861	-0.0099101	-0.00426408
-0.0654	0.000356167	0.00104674	0.00336093	0.00820229	0.00820965	0.00571246		-0.0654	0.000523228	0.00111074	0.00329545	0.00765217	0.0111576	0.00705265		-0.0654	-0.00254006	-0.00325597	-0.00403851	-0.018382	-0.0128645	-0.00529154		-0.0654	-0.00237868	-0.00218977	-0.00170578	-0.0109691	-0.00988998	-0.0042592
-0.0652	0.00035595	0.00104987	0.00337386	0.00825702	0.00820751	0.00571643		-0.0652	0.000523507	0.00111086	0.0032941	0.00766707	0.0111762	0.00706118		-0.0652	-0.00254028	-0.00325285	-0.00402558	-0.0183273	-0.0128666	-0.00528758		-0.0652	-0.0023784	-0.00218965	-0.00170713	-0.0109542	-0.00987139	-0.00425067
-0.065	0.000355896	0.00105409	0.00338939	0.00829277	0.00820294	0.005721		-0.065	0.000527753	0.00111139	0.00329695	0.00767623	0.0111945	0.00707459		-0.065	-0.00254033	-0.00324863	-0.00401005	-0.0182916	-0.0128712	-0.00528301		-0.065	-0.00237416	-0.00218911	-0.00170429	-0.010945	-0.0098531	-0.00423726
-0.0648	0.000355842	0.00105839	0.00340332	0.0083393	0.00819624	0.00572466		-0.0648	0.000534854	0.00111187	0.00330031	0.00768954	0.0112149	0.00708465		-0.0648	-0.00254038	-0.00324432	-0.00399613	-0.018245	-0.0128779	-0.00527935		-0.0648	-0.00236706	-0.00218863	-0.00170093	-0.0109317	-0.00983268	-0.0042272
-0.0646	0.000355517	0.00106214	0.00341571	0.00837848	0.00819593	0.00572801		-0.0646	0.000539866	0.001112	0.00330411	0.00771454	0.0112393	0.00708709		-0.0646	-0.00254071	-0.00324057	-0.00398373	-0.0182058	-0.0128782	-0.005276		-0.0646	-0.00236204	-0.00218851	-0.00169713	-0.0109067	-0.0098083	-0.00422476
-0.0644	0.00035503	0.00106662	0.00342946	0.00843196	0.00820721	0.00573045		-0.0644	0.000541607	0.00111195	0.00330827	0.00774099	0.0112658	0.00708587		-0.0644	-0.0025412	-0.0032361	-0.00396998	-0.0181524	-0.0128669	-0.00527356		-0.0644	-0.0023603	-0.00218855	-0.00169297	-0.0108803	-0.00978178	-0.00422598
-0.0642	0.000354597	0.00106898	0.00344031	0.00849078	0.00823068	0.00573624		-0.0642	0.000543486	0.00111181	0.00331213	0.00775993	0.0112905	0.00708709		-0.0642	-0.00254163	-0.00323373	-0.00395913	-0.0180935	-0.0128434	-0.00526777		-0.0642	-0.00235842	-0.0021887	-0.0016891	-0.0108613	-0.00975709	-0.00422476
-0.064	0.000354164	0.00107024	0.00345238	0.00854844	0.00826177	0.00575392		-0.064	0.000547245	0.00111214	0.00331574	0.00777226	0.0113106	0.00709532		-0.064	-0.00254206	-0.00323248	-0.00394707	-0.0180359	-0.0128124	-0.00525009		-0.064	-0.00235467	-0.00218836	-0.0016855	-0.010849	-0.00973697	-0.00421653
-0.0638	0.000353568	0.00107328	0.0034676	0.00859304	0.00829438	0.00577007		-0.0638	0.000550657	0.00111283	0.00332009	0.0077843	0.0113243	0.00710842		-0.0638	-0.00254266	-0.00322943	-0.00393184	-0.0179913	-0.0127797	-0.00523394		-0.0638	-0.00235125	-0.00218768	-0.00168114	-0.010837	-0.00972326	-0.00420343
-0.0636	0.000353189	0.00107256	0.0034832	0.00862061	0.00832059	0.00578196		-0.0636	0.000554068	0.00111626	0.00332147	0.00779901	0.0113344	0.00712397		-0.0636	-0.00254304	-0.00323016	-0.00391624	-0.0179637	-0.0127535	-0.00522205		-0.0636	-0.00234784	-0.00218424	-0.00167977	-0.0108222	-0.0097132	-0.00418788
-0.0634	0.000352593	0.00107248	0.00349652	0.00863814	0.00834193	0.00580329		-0.0634	0.000555878	0.0011191	0.00332288	0.00781762	0.011342	0.00713342		-0.0634	-0.00254363	-0.00323023	-0.00390292	-0.0179462	-0.0127322	-0.00520071		-0.0634	-0.00234603	-0.00218141	-0.00167835	-0.0108036	-0.00970558	-0.00417843
-0.0632	0.000352485	0.00107424	0.00351251	0.00866575	0.00836174	0.00582829		-0.0632	0.000555947	0.00112066	0.00332304	0.00784555	0.0113469	0.00713525		-0.0632	-0.00254374	-0.00322847	-0.00388693	-0.0179186	-0.0127124	-0.00517572		-0.0632	-0.00234596	-0.00217984	-0.0016782	-0.0107757	-0.0097007	-0.0041766
-0.063	0.000353135	0.00107763	0.0035242	0.0087082	0.00838369	0.00585358		-0.063	0.000556783	0.00112239	0.00332048	0.00787567	0.0113506	0.007145		-0.063	-0.00254309	-0.00322509	-0.00387524	-0.0178761	-0.0126904	-0.00515042		-0.063	-0.00234513	-0.00217812	-0.00168075	-0.0107456	-0.00969705	-0.00416685
-0.0628	0.000353514	0.00108008	0.00353491	0.00874519	0.0084035	0.00587644		-0.0628	0.000557757	0.00112165	0.00331595	0.00789968	0.0113545	0.00715628		-0.0628	-0.00254271	-0.00322264	-0.00386453	-0.0178391	-0.0126706	-0.00512756		-0.0628	-0.00234415	-0.00217885	-0.00168529	-0.0107216	-0.00969308	-0.00415557
-0.0626	0.000353027	0.00108341	0.00354605	0.00876194	0.00842057	0.00589869		-0.0626	0.000558453	0.00112414	0.00331154	0.00791387	0.0113579	0.00716664		-0.0626	-0.0025432	-0.0032193	-0.00385339	-0.0178224	-0.0126536	-0.00510531		-0.0626	-0.00234346	-0.00217636	-0.00168969	-0.0107074	-0.00968973	-0.00414521
-0.0624	0.000353406	0.00108747	0.00355623	0.00877027	0.00843641	0.00592125		-0.0624	0.000558175	0.0011277	0.00330598	0.00792303	0.0113643	0.0071767		-0.0624	-0.00254282	-0.00321525	-0.00384321	-0.0178141	-0.0126377	-0.00508276		-0.0624	-0.00234374	-0.00217281	-0.00169525	-0.0106982	-0.00968333	-0.00413515
-0.0622	0.00035373	0.00109062	0.00356669	0.00878571	0.00845013	0.0059435		-0.0622	0.000557896	0.00113052	0.00330052	0.00793272	0.0113719	0.00718462		-0.0622	-0.0025425	-0.0032121	-0.00383275	-0.0177986	-0.012624	-0.00506051		-0.0622	-0.00234401	-0.00216999	-0.00170071	-0.0106885	-0.00967571	-0.00412723
-0.062	0.000353839	0.00109318	0.00357716	0.00880374	0.00846598	0.0059624		-0.062	0.000557479	0.00113268	0.00329439	0.00794347	0.0113792	0.00719224		-0.062	-0.00254239	-0.00320953	-0.00382228	-0.0177806	-0.0126081	-0.00504161		-0.062	-0.00234443	-0.00216783	-0.00170685	-0.0106778	-0.0096684	-0.00411961
-0.0618	0.00035373	0.00109328	0.00358828	0.00881872	0.00848152	0.00597977		-0.0618	0.000557618	0.00113062	0.00328874	0.00795518	0.0113859	0.00719925		-0.0618	-0.0025425	-0.00320943	-0.00381116	-0.0177656	-0.0125926	-0.00502424		-0.0618	-0.00234429	-0.00216989	-0.00171249	-0.0106661	-0.00966169	-0.0041126
-0.0616	0.000353676	0.00109401	0.00359747	0.00884129	0.00849646	0.00599806		-0.0616	0.00055901	0.00112683	0.00328357	0.00796868	0.0113951	0.00720748		-0.0616	-0.00254255	-0.00320871	-0.00380198	-0.017743	-0.0125777	-0.00500595		-0.0616	-0.0023429	-0.00217368	-0.00171767	-0.0106526	-0.00965255	-0.00410437
-0.0614	0.000353893	0.00109647	0.00360641	0.00888105	0.0085056	0.00601756		-0.0614	0.000560681	0.00112299	0.00327851	0.00798308	0.0114051	0.00721327		-0.0614	-0.00254233	-0.00320625	-0.00379303	-0.0177033	-0.0125685	-0.00498644		-0.0614	-0.00234123	-0.00217752	-0.00172273	-0.0106382	-0.00964249	-0.00409858
-0.0612	0.000354326	0.00109871	0.00361589	0.00893999	0.00851627	0.00603402		-0.0612	0.000561308	0.00112019	0.00327406	0.00800011	0.0114182	0.00721693		-0.0612	-0.0025419	-0.00320401	-0.00378355	-0.0176443	-0.0125579	-0.00496998		-0.0612	-0.0023406	-0.00218032	-0.00172717	-0.0106211	-0.00962938	-0.00409492
-0.061	0.000354488	0.00110232	0.00362194	0.00899445	0.0085373	0.00604987		-0.061	0.000564023	0.00111888	0.00327029	0.00802117	0.0114301	0.00721998		-0.061	-0.00254174	-0.00320039	-0.0037775	-0.0175899	-0.0125368	-0.00495413		-0.061	-0.00233789	-0.00218163	-0.00173094	-0.0106001	-0.0096175	-0.00409187
-0.0608	0.000354868	0.00110753	0.00363217	0.00904489	0.00855498	0.00606328		-0.0608	0.000567016	0.00111879	0.00327162	0.00804238	0.0114386	0.00722272		-0.0608	-0.00254136	-0.00319518	-0.00376727	-0.0175394	-0.0125191	-0.00494072		-0.0608	-0.00233489	-0.00218172	-0.00172961	-0.0105789	-0.00960896	-0.00408913
-0.0606	0.000354759	0.00111144	0.00364375	0.00908328	0.00856595	0.00607456		-0.0606	0.000569592	0.00111985	0.00327344	0.00806316	0.0114502	0.00722882		-0.0606	-0.00254147	-0.00319127	-0.00375569	-0.017501	-0.0125082	-0.00492945		-0.0606	-0.00233232	-0.00218066	-0.00172779	-0.0105581	-0.00959738	-0.00408303
-0.0604	0.000354489	0.00111486	0.00365217	0.00912614	0.00858028	0.00608736		-0.0604	0.000571123	0.00112096	0.00327804	0.00808441	0.0114646	0.00723217		-0.0604	-0.00254174	-0.00318786	-0.00374727	-0.0174582	-0.0124938	-0.00491664		-0.0604	-0.00233079	-0.00217954	-0.0017232	-0.0105368	-0.00958305	-0.00407968
-0.0602	0.000354326	0.00111758	0.00366041	0.00916761	0.0086074	0.00609864		-0.0602	0.000571402	0.00112262	0.00328205	0.00810505	0.0114783	0.00723248		-0.0602	-0.0025419	-0.00318513	-0.00373903	-0.0174167	-0.0124667	-0.00490537		-0.0602	-0.00233051	-0.00217788	-0.00171918	-0.0105162	-0.00956934	-0.00407937
-0.06	0.000354489	0.00111958	0.00367048	0.00922534	0.00863667	0.00611388		-0.06	0.00057349	0.00112254	0.00328967	0.00812205	0.0114898	0.00723552		-0.06	-0.00254174	-0.00318313	-0.00372896	-0.017359	-0.0124375	-0.00489013		-0.06	-0.00232842	-0.00217797	-0.00171157	-0.0104992	-0.00955776	-0.00407633
-0.0598	0.000354434	0.00112515	0.00367748	0.00930163	0.00865556	0.00613095		-0.0598	0.000575509	0.00112287	0.00330006	0.00813695	0.011499	0.0072404		-0.0598	-0.00254179	-0.00317756	-0.00372196	-0.0172827	-0.0124186	-0.00487306		-0.0598	-0.0023264	-0.00217763	-0.00170117	-0.0104843	-0.00954861	-0.00407145
-0.0596	0.000354218	0.00113241	0.00368274	0.00937373	0.00867172	0.00615198		-0.0596	0.000575648	0.00112421	0.00331073	0.00814756	0.0115063	0.00724467		-0.0596	-0.00254201	-0.00317031	-0.0037167	-0.0172106	-0.0124024	-0.00485203		-0.0596	-0.00232626	-0.00217629	-0.0016905	-0.0104737	-0.0095413	-0.00406718
-0.0594	0.000354326	0.0011358	0.00368726	0.00942973	0.00868543	0.00617819		-0.0594	0.000576623	0.00112355	0.00332254	0.00815805	0.0115215	0.00724893		-0.0594	-0.0025419	-0.00316691	-0.00371219	-0.0171546	-0.0123887	-0.00482582		-0.0594	-0.00232529	-0.00217696	-0.0016787	-0.0104632	-0.00952606	-0.00406291
-0.0592	0.000354218	0.00113558	0.00369327	0.00947391	0.00869732	0.00620837		-0.0592	0.000576553	0.001124	0.003333	0.00817081	0.0115435	0.00726021		-0.0592	-0.00254201	-0.00316714	-0.00370617	-0.0171104	-0.0123768	-0.00479564		-0.0592	-0.00232536	-0.00217651	-0.00166824	-0.0104504	-0.00950411	-0.00405164
-0.059	0.000354109	0.00113488	0.00369442	0.00950851	0.00870768	0.00624128		-0.059	0.00057725	0.00112742	0.00334292	0.00818351	0.0115609	0.00728277		-0.059	-0.00254212	-0.00316783	-0.00370502	-0.0170758	-0.0123664	-0.00476272		-0.059	-0.00232466	-0.00217309	-0.00165831	-0.0104377	-0.00948674	-0.00402908
-0.0588	0.000353676	0.00113655	0.00369989	0.00954891	0.00871926	0.00627176		-0.0588	0.000578433	0.00113168	0.00335213	0.00819694	0.0115749	0.00731264		-0.0588	-0.00254255	-0.00316616	-0.00369955	-0.0170354	-0.0123549	-0.00473224		-0.0588	-0.00232348	-0.00216883	-0.00164911	-0.0104243	-0.00947272	-0.00399921
-0.0586	0.000353839	0.00113933	0.00371324	0.0095983	0.00873207	0.00630102		-0.0586	0.0005808	0.00113581	0.00336129	0.0082102	0.0115886	0.0073294		-0.0586	-0.00254239	-0.00316338	-0.0036862	-0.016986	-0.0123421	-0.00470298		-0.0586	-0.00232111	-0.0021647	-0.00163995	-0.0104111	-0.009459	-0.00398245
-0.0584	0.000353676	0.00114185	0.00372661	0.00963968	0.00874273	0.00632144		-0.0584	0.000583585	0.00113814	0.00336684	0.00822265	0.0116145	0.00733245		-0.0584	-0.00254255	-0.00316086	-0.00367283	-0.0169446	-0.0123314	-0.00468256		-0.0584	-0.00231833	-0.00216237	-0.00163439	-0.0103986	-0.00943309	-0.0039794
-0.0582	0.000353893	0.00114654	0.00374129	0.00967314	0.00875554	0.00635131		-0.0582	0.000585534	0.00114181	0.00336885	0.00823316	0.0116401	0.00733733		-0.0582	-0.00254233	-0.00315617	-0.00365815	-0.0169112	-0.0123186	-0.00465269		-0.0582	-0.00231638	-0.0021587	-0.00163238	-0.0103881	-0.00940749	-0.00397452
-0.058	0.000354543	0.00115073	0.00375739	0.00971202	0.00876559	0.00637996		-0.058	0.0005863	0.00114882	0.00336889	0.00824512	0.01167	0.00735104		-0.058	-0.00254168	-0.00315199	-0.00364205	-0.0168723	-0.0123085	-0.00462404		-0.058	-0.00231561	-0.00215168	-0.00163235	-0.0103761	-0.00937762	-0.00396081
-0.0578	0.000354759	0.00115635	0.0037753	0.009748	0.00877778	0.00640435		-0.0578	0.000589989	0.00115648	0.00336818	0.00825561	0.0117066	0.00736902		-0.0578	-0.00254147	-0.00314637	-0.00362415	-0.0168363	-0.0122963	-0.00459966		-0.0578	-0.00231192	-0.00214403	-0.00163306	-0.0103656	-0.00934105	-0.00394283
-0.0576	0.000355301	0.00116186	0.00379319	0.00978659	0.0087851	0.00643056		-0.0576	0.00059521	0.00116577	0.00336765	0.00826686	0.0117389	0.00739158		-0.0576	-0.00254093	-0.00314085	-0.00360625	-0.0167977	-0.012289	-0.00457345		-0.0576	-0.0023067	-0.00213473	-0.00163359	-0.0103544	-0.00930874	-0.00392027
-0.0574	0.000356384	0.00116752	0.00380988	0.00984739	0.00880125	0.0064522		-0.0574	0.000606209	0.00117242	0.00336831	0.00827583	0.0117697	0.00741383		-0.0574	-0.00253984	-0.00313519	-0.00358956	-0.0167369	-0.0122729	-0.00455181		-0.0574	-0.0022957	-0.00212809	-0.00163293	-0.0103454	-0.00927795	-0.00389802
-0.0572	0.000356979	0.00117207	0.00382518	0.00989557	0.00882168	0.00646988		-0.0572	0.000621107	0.00117647	0.00336867	0.00828382	0.0117953	0.00743029		-0.0572	-0.00253925	-0.00313064	-0.00357426	-0.0166887	-0.0122524	-0.00453413		-0.0572	-0.0022808	-0.00212404	-0.00163256	-0.0103374	-0.00925235	-0.00388156
-0.057	0.000357142	0.00117348	0.00383892	0.00993998	0.00884423	0.00648603		-0.057	0.000631062	0.00118331	0.00336903	0.00829072	0.011816	0.00744126		-0.057	-0.00253908	-0.00312923	-0.00356052	-0.0166443	-0.0122299	-0.00451797		-0.057	-0.00227085	-0.00211719	-0.00163221	-0.0103305	-0.00923162	-0.00387059
-0.0568	0.000357304	0.00117473	0.00385277	0.00998591	0.00887441	0.00650432		-0.0568	0.000638998	0.00119045	0.00337056	0.00829825	0.0118382	0.00744675		-0.0568	-0.00253892	-0.00312798	-0.00354667	-0.0165984	-0.0121997	-0.00449969		-0.0568	-0.00226291	-0.00211006	-0.00163067	-0.010323	-0.00920938	-0.0038651
-0.0566	0.000358008	0.00117522	0.00386643	0.0100367	0.00890763	0.00651316		-0.0566	0.000651251	0.00119597	0.00337246	0.00830607	0.0118626	0.00744857		-0.0566	-0.00253822	-0.00312749	-0.00353301	-0.0165476	-0.0121665	-0.00449085		-0.0566	-0.00225066	-0.00210454	-0.00162878	-0.0103152	-0.00918499	-0.00386327
-0.0564	0.00035882	0.00117576	0.00387384	0.0101071	0.00893354	0.00651987		-0.0564	0.000665313	0.00119987	0.00337256	0.0083132	0.0118843	0.00744827		-0.0564	-0.00253741	-0.00312695	-0.0035256	-0.0164772	-0.0121406	-0.00448414		-0.0564	-0.0022366	-0.00210064	-0.00162868	-0.0103081	-0.00916335	-0.00386358
-0.0562	0.000359903	0.00117865	0.00388294	0.0101843	0.00894451	0.00652322		-0.0562	0.000675337	0.00120291	0.00337559	0.00832011	0.0119001	0.00744309		-0.0562	-0.00253632	-0.00312406	-0.00351651	-0.0164	-0.0121296	-0.00448079		-0.0562	-0.00222657	-0.0020976	-0.00162565	-0.0103011	-0.0091475	-0.00386876
-0.056	0.00036169	0.00118251	0.00389294	0.0102561	0.00894786	0.00653267		-0.056	0.000681603	0.0012055	0.00337635	0.00832785	0.0119132	0.00743638		-0.056	-0.00253454	-0.00312021	-0.0035065	-0.0163282	-0.0121263	-0.00447134		-0.056	-0.00222031	-0.00209501	-0.00162488	-0.0102934	-0.0091344	-0.00387547
-0.0558	0.000364072	0.00118729	0.00390384	0.0103079	0.00895426	0.00654181		-0.0558	0.00068578	0.00120715	0.00337889	0.00833425	0.0119288	0.00742968		-0.0558	-0.00253215	-0.00311543	-0.0034956	-0.0162764	-0.0121199	-0.0044622		-0.0558	-0.00221613	-0.00209335	-0.00162234	-0.010287	-0.00911885	-0.00388217
-0.0556	0.000365913	0.00119282	0.00391268	0.010357	0.00896188	0.006554		-0.0556	0.00069114	0.00121014	0.00337983	0.00834028	0.0119449	0.00742693		-0.0556	-0.00253031	-0.00310989	-0.00348676	-0.0162273	-0.0121122	-0.00445		-0.0556	-0.00221077	-0.00209037	-0.00162141	-0.010281	-0.0091027	-0.00388491
-0.0554	0.000367321	0.00119733	0.00391999	0.0104257	0.00898626	0.00656802		-0.0554	0.000696709	0.00121191	0.00338311	0.00835415	0.0119595	0.00743242		-0.0554	-0.0025289	-0.00310538	-0.00347946	-0.0161586	-0.0120879	-0.00443598		-0.0554	-0.0022052	-0.0020886	-0.00161812	-0.0102671	-0.00908807	-0.00387943
-0.0552	0.000369216	0.00119928	0.00392707	0.0104902	0.00902467	0.00658143		-0.0552	0.000701791	0.00121569	0.00338551	0.00837155	0.011976	0.00744309		-0.0552	-0.00252701	-0.00310344	-0.00347237	-0.0160941	-0.0120495	-0.00442257		-0.0552	-0.00220012	-0.00208481	-0.00161572	-0.0102497	-0.00907161	-0.00386876
-0.055	0.000370732	0.0012027	0.00393955	0.0105474	0.00905637	0.00659728		-0.055	0.000705063	0.00121973	0.00338889	0.00838699	0.0119864	0.0074501		-0.055	-0.00252549	-0.00310002	-0.0034599	-0.0160369	-0.0120178	-0.00440672		-0.055	-0.00219685	-0.00208078	-0.00161234	-0.0102343	-0.00906124	-0.00386175
-0.0548	0.000375984	0.00120809	0.00395058	0.0105973	0.00908654	0.006611		-0.0548	0.000706316	0.00122408	0.00339175	0.00839794	0.0119949	0.00745162		-0.0548	-0.00252024	-0.00309462	-0.00344887	-0.015987	-0.0119876	-0.00439301		-0.0548	-0.00219559	-0.00207643	-0.00160948	-0.0102233	-0.00905271	-0.00386023
-0.0546	0.000382211	0.00121271	0.0039618	0.0106641	0.00911154	0.0066174		-0.0546	0.000710911	0.00122897	0.00339669	0.008422	0.0120074	0.00745894		-0.0546	-0.00251401	-0.00309	-0.00343764	-0.0159202	-0.0119626	-0.00438661		-0.0546	-0.002191	-0.00207154	-0.00160455	-0.0101993	-0.00904021	-0.00385291
-0.0544	0.000386867	0.0012156	0.00397365	0.0107429	0.0091347	0.00662197		-0.0544	0.000716132	0.00123454	0.00340227	0.00845319	0.012019	0.00746717		-0.0544	-0.00250936	-0.00308711	-0.00342579	-0.0158414	-0.0119394	-0.00438203		-0.0544	-0.00218578	-0.00206596	-0.00159897	-0.0101681	-0.00902863	-0.00384468
-0.0542	0.000388383	0.00121734	0.00398485	0.0108163	0.00915756	0.00662532		-0.0542	0.000718986	0.00123968	0.00340702	0.00847998	0.0120327	0.00747418		-0.0542	-0.00250784	-0.00308538	-0.00341459	-0.0157681	-0.0119166	-0.00437868		-0.0542	-0.00218292	-0.00206083	-0.00159421	-0.0101413	-0.00901492	-0.00383767
-0.054	0.000392282	0.00121912	0.00399582	0.0108698	0.00918316	0.0066302		-0.054	0.00072003	0.00124386	0.00341219	0.0085013	0.012044	0.00748088		-0.054	-0.00250394	-0.00308359	-0.00340362	-0.0157146	-0.011891	-0.00437381		-0.054	-0.00218188	-0.00205665	-0.00158905	-0.01012	-0.00900364	-0.00383097
-0.0538	0.000397047	0.00122047	0.00400284	0.0109082	0.00920572	0.00663416		-0.0538	0.000723998	0.00124762	0.00342085	0.00853567	0.0120592	0.00748485		-0.0538	-0.00249918	-0.00308224	-0.0033966	-0.0156761	-0.0118684	-0.00436984		-0.0538	-0.00217791	-0.00205288	-0.00158038	-0.0100856	-0.0089884	-0.003827
-0.0536	0.000400674	0.00122279	0.0040099	0.0109448	0.00922126	0.00664117		-0.0536	0.000729707	0.00125153	0.00342854	0.00857414	0.0120708	0.00749155		-0.0536	-0.00249555	-0.00307993	-0.00338954	-0.0156395	-0.0118529	-0.00436283		-0.0536	-0.0021722	-0.00204897	-0.00157269	-0.0100471	-0.00897682	-0.0038203
-0.0534	0.000403652	0.00122602	0.00401924	0.0109816	0.00924199	0.00665215		-0.0534	0.00073277	0.00125761	0.00343564	0.00859991	0.012086	0.00750069		-0.0534	-0.00249257	-0.00307669	-0.0033802	-0.0156028	-0.0118321	-0.00435186		-0.0534	-0.00216914	-0.0020429	-0.00156559	-0.0100213	-0.00896158	-0.00381115
-0.0532	0.000405926	0.00122825	0.00402708	0.0110176	0.0092618	0.0066558		-0.0532	0.000737086	0.0012624	0.00344002	0.00861816	0.0121055	0.00750679		-0.0532	-0.0024903	-0.00307446	-0.00337236	-0.0155667	-0.0118123	-0.0043482		-0.0532	-0.00216482	-0.00203811	-0.00156122	-0.0100031	-0.00894207	-0.00380506
-0.053	0.000407118	0.00123252	0.00403397	0.0110539	0.00927521	0.00665794		-0.053	0.000746066	0.00126722	0.0034439	0.00863542	0.0121284	0.00750679		-0.053	-0.00248911	-0.00307019	-0.00336547	-0.0155304	-0.0117989	-0.00434607		-0.053	-0.00215584	-0.00203328	-0.00155734	-0.00998584	-0.00891921	-0.00380506
-0.0528	0.000408904	0.0012396	0.00404601	0.0110944	0.00928405	0.00665702		-0.0528	0.000755256	0.00127178	0.00344832	0.00865595	0.0121506	0.00750557		-0.0528	-0.00248732	-0.00306312	-0.00335344	-0.0154899	-0.0117901	-0.00434698		-0.0528	-0.00214666	-0.00202872	-0.00155291	-0.0099653	-0.00889696	-0.00380628
-0.0526	0.000410908	0.00124813	0.00405984	0.01115	0.00929228	0.00665276		-0.0526	0.000761382	0.00127475	0.00345348	0.00867943	0.012165	0.00750527		-0.0526	-0.00248532	-0.00305459	-0.0033396	-0.0154343	-0.0117818	-0.00435125		-0.0526	-0.00214053	-0.00202576	-0.00154775	-0.00994182	-0.00888263	-0.00380658
-0.0524	0.000412586	0.00125437	0.00406933	0.0111979	0.0093002	0.00664696		-0.0524	0.000765141	0.00127651	0.00345681	0.00870762	0.0121781	0.00751045		-0.0524	-0.00248364	-0.00304834	-0.00333011	-0.0153864	-0.0117739	-0.00435704		-0.0524	-0.00213677	-0.00202399	-0.00154442	-0.00991363	-0.00886953	-0.0038014
-0.0522	0.00041394	0.00125758	0.004079	0.0112557	0.00930264	0.00664148		-0.0522	0.000766673	0.00127866	0.00345857	0.00873388	0.0121985	0.00751837		-0.0522	-0.00248229	-0.00304514	-0.00332044	-0.0153286	-0.0117715	-0.00436253		-0.0522	-0.00213524	-0.00202185	-0.00154267	-0.00988737	-0.00884911	-0.00379348
-0.052	0.000414698	0.00125983	0.00409341	0.0112975	0.00930234	0.00663538		-0.052	0.000768274	0.00128025	0.00346078	0.00876057	0.0122214	0.00752051		-0.052	-0.00248153	-0.00304289	-0.00330603	-0.0152868	-0.0117718	-0.00436862		-0.052	-0.00213364	-0.00202026	-0.00154046	-0.00986068	-0.00882625	-0.00379134
-0.0518	0.00041486	0.00126365	0.00410714	0.0113437	0.00929837	0.0066299		-0.0518	0.000770571	0.00128129	0.00346501	0.00878717	0.0122473	0.00751837		-0.0518	-0.00248137	-0.00303906	-0.0032923	-0.0152406	-0.0117757	-0.00437411		-0.0518	-0.00213134	-0.00201921	-0.00153623	-0.00983409	-0.00880034	-0.00379348
-0.0516	0.000415456	0.00126675	0.00412088	0.0113831	0.00930295	0.00662532		-0.0516	0.000772938	0.00128398	0.0034687	0.00881091	0.0122768	0.00751624		-0.0516	-0.00248077	-0.00303596	-0.00327856	-0.0152012	-0.0117712	-0.00437868		-0.0516	-0.00212897	-0.00201653	-0.00153254	-0.00981035	-0.00877078	-0.00379561
-0.0514	0.000415889	0.00127246	0.00413751	0.0114293	0.00931849	0.0066238		-0.0514	0.000774887	0.0012882	0.00347068	0.0088359	0.0123146	0.00751563		-0.0514	-0.00248034	-0.00303026	-0.00326193	-0.015155	-0.0117556	-0.00438021		-0.0514	-0.00212702	-0.0020123	-0.00153056	-0.00978536	-0.00873298	-0.00379622
-0.0512	0.000416376	0.00127822	0.00415	0.0114774	0.0093316	0.00663325		-0.0512	0.000775792	0.00129216	0.0034745	0.00886657	0.0123509	0.00751685		-0.0512	-0.00247985	-0.00302449	-0.00324945	-0.0151069	-0.0117425	-0.00437076		-0.0512	-0.00212612	-0.00200834	-0.00152674	-0.00975469	-0.00869671	-0.003795
-0.051	0.000417189	0.00128385	0.00416187	0.011518	0.00934379	0.00663813		-0.051	0.00077802	0.00129466	0.00348116	0.00889984	0.0123774	0.00750831		-0.051	-0.00247904	-0.00301887	-0.00323757	-0.0150663	-0.0117303	-0.00436588		-0.051	-0.00212389	-0.00200584	-0.00152008	-0.00972141	-0.00867019	-0.00380353
-0.0508	0.000417947	0.00129135	0.00417636	0.0115638	0.00935263	0.00663782		-0.0508	0.000782058	0.00129665	0.00348431	0.00892916	0.0123997	0.00749399		-0.0508	-0.00247828	-0.00301137	-0.00322308	-0.0150205	-0.0117215	-0.00436619		-0.0508	-0.00211985	-0.00200386	-0.00151693	-0.0096921	-0.00864794	-0.00381786
-0.0506	0.000419354	0.00130043	0.00419345	0.0116216	0.00935507	0.0066366		-0.0506	0.00078707	0.00129805	0.00348626	0.00895886	0.0124152	0.00747844		-0.0506	-0.00247687	-0.00300229	-0.00320599	-0.0149627	-0.0117191	-0.0043674		-0.0506	-0.00211484	-0.00200246	-0.00151498	-0.00966239	-0.0086324	-0.0038334
-0.0504	0.000420708	0.00131266	0.00421157	0.0116818	0.00935324	0.0066366		-0.0504	0.000791038	0.00129808	0.00348713	0.00898852	0.0124295	0.00746839		-0.0504	-0.00247552	-0.00299006	-0.00318787	-0.0149026	-0.0117209	-0.0043674		-0.0504	-0.00211087	-0.00200243	-0.00151411	-0.00963274	-0.00861807	-0.00384346
-0.0502	0.000421466	0.00132428	0.00422471	0.0117546	0.00935019	0.00663813		-0.0502	0.000792987	0.0012985	0.00349	0.00901502	0.0124582	0.00746747		-0.0502	-0.00247476	-0.00297844	-0.00317473	-0.0148298	-0.0117239	-0.00436588		-0.0502	-0.00210892	-0.00200201	-0.00151123	-0.00960623	-0.00858942	-0.00384438
-0.05	0.000421791	0.00133233	0.00423658	0.0118048	0.00935568	0.006643		-0.05	0.000795006	0.00130027	0.00348865	0.00903858	0.0124999	0.00746839		-0.05	-0.00247443	-0.00297038	-0.00316286	-0.0147795	-0.0117184	-0.004361		-0.05	-0.00210691	-0.00200024	-0.00151259	-0.00958267	-0.00854767	-0.00384346
-0.0498	0.000422224	0.00133812	0.00424777	0.0118658	0.00936665	0.00664971		-0.0498	0.000799461	0.00130297	0.00349098	0.0090601	0.0125377	0.00747631		-0.0498	-0.002474	-0.00296459	-0.00315167	-0.0147185	-0.0117075	-0.0043543		-0.0498	-0.00210245	-0.00199754	-0.00151026	-0.00956115	-0.00850987	-0.00383554
-0.0496	0.000422928	0.00134581	0.00425663	0.0119336	0.00938677	0.00665946		-0.0496	0.000803499	0.0013076	0.00349307	0.00909082	0.0125643	0.0074885		-0.0496	-0.0024733	-0.0029569	-0.00314281	-0.0146508	-0.0116874	-0.00434454		-0.0496	-0.00209841	-0.0019929	-0.00150816	-0.00953044	-0.00848335	-0.00382335
-0.0494	0.000423145	0.00135152	0.004267	0.0119844	0.00941267	0.00667043		-0.0494	0.000809068	0.00131152	0.00349667	0.00913411	0.0125862	0.00749125		-0.0494	-0.00247308	-0.00295119	-0.00313244	-0.0145999	-0.0116614	-0.00433357		-0.0494	-0.00209284	-0.00198899	-0.00150456	-0.00948714	-0.00846141	-0.0038206
-0.0492	0.000423903	0.00135475	0.00428053	0.0120297	0.00943645	0.00667379		-0.0492	0.000817422	0.00131465	0.00350145	0.00917888	0.0126203	0.00748332		-0.0492	-0.00247232	-0.00294797	-0.00311891	-0.0145547	-0.0116377	-0.00433022		-0.0492	-0.00208449	-0.00198586	-0.00149979	-0.00944238	-0.00842727	-0.00382853
-0.049	0.000425094	0.00135997	0.00429554	0.0120703	0.00945717	0.00667409		-0.049	0.000825637	0.00131753	0.00350283	0.00922152	0.012659	0.00747936		-0.049	-0.00247113	-0.00294275	-0.0031039	-0.014514	-0.0116169	-0.00432991		-0.049	-0.00207627	-0.00198298	-0.00149841	-0.00939973	-0.00838856	-0.00383249
-0.0488	0.000427314	0.00136874	0.00431186	0.012129	0.00946876	0.00667653		-0.0488	0.000831136	0.00132241	0.00350471	0.00925389	0.0126914	0.00748302		-0.0488	-0.00246891	-0.00293397	-0.00308759	-0.0144553	-0.0116054	-0.00432748		-0.0488	-0.00207077	-0.00197809	-0.00149652	-0.00936736	-0.00835625	-0.00382883
-0.0486	0.000430508	0.00137835	0.00432994	0.0121879	0.00946845	0.00667988		-0.0486	0.000833782	0.00132825	0.003512	0.00927847	0.0127285	0.00749033		-0.0486	-0.00246572	-0.00292437	-0.0030695	-0.0143964	-0.0116057	-0.00432412		-0.0486	-0.00206813	-0.00197226	-0.00148923	-0.00934278	-0.00831907	-0.00382152
-0.0484	0.00043354	0.00138608	0.00434776	0.0122317	0.00946997	0.00668811		-0.0484	0.000836845	0.0013336	0.00352039	0.00930732	0.0127916	0.00750069		-0.0484	-0.00246269	-0.00291664	-0.00305169	-0.0143526	-0.0116041	-0.00431589		-0.0484	-0.00206507	-0.00196691	-0.00148084	-0.00931393	-0.00825598	-0.00381115
-0.0482	0.000437006	0.00138976	0.00436093	0.012261	0.00947302	0.0066939		-0.0482	0.000840604	0.0013362	0.00352791	0.00934487	0.0128605	0.00750679		-0.0482	-0.00245922	-0.00291296	-0.00303851	-0.0143234	-0.0116011	-0.0043101		-0.0482	-0.00206131	-0.00196431	-0.00147332	-0.00927639	-0.00818709	-0.00380506
-0.048	0.000442312	0.00139434	0.00437273	0.0122912	0.0094779	0.00669787		-0.048	0.00084492	0.00134027	0.00353744	0.00939246	0.012927	0.00751258		-0.048	-0.00245391	-0.00290837	-0.00302671	-0.0142931	-0.0115962	-0.00430614		-0.048	-0.00205699	-0.00196024	-0.0014638	-0.0092288	-0.00812065	-0.00379927
-0.0478	0.00044908	0.00139782	0.00438733	0.0123269	0.00949344	0.00670183		-0.0478	0.00084854	0.00134419	0.00354546	0.00943617	0.0129782	0.00751502		-0.0478	-0.00244715	-0.0029049	-0.00301211	-0.0142574	-0.0115807	-0.00430218		-0.0478	-0.00205337	-0.00195632	-0.00145577	-0.00918508	-0.00806944	-0.00379683
-0.0476	0.000455036	0.00139892	0.00440127	0.0123577	0.00951204	0.00670335		-0.0476	0.000857172	0.00134623	0.00355154	0.00946744	0.0130202	0.00751746		-0.0476	-0.00244119	-0.0029038	-0.00299817	-0.0142266	-0.0115621	-0.00430065		-0.0476	-0.00204474	-0.00195428	-0.00144969	-0.00915382	-0.00802738	-0.00379439
-0.0474	0.000463916	0.00140033	0.0044179	0.0123873	0.00953368	0.0067067		-0.0474	0.000867823	0.00134875	0.00355774	0.00949627	0.0130455	0.0075135		-0.0474	-0.00243231	-0.00290239	-0.00298154	-0.014197	-0.0115404	-0.0042973		-0.0474	-0.00203409	-0.00195176	-0.00144349	-0.00912498	-0.00800208	-0.00379835
-0.0472	0.00047507	0.00140481	0.00443547	0.0124088	0.00955562	0.00671189		-0.0472	0.000875551	0.00135302	0.00356341	0.0095356	0.0130702	0.0075138		-0.0472	-0.00242116	-0.00289791	-0.00296398	-0.0141755	-0.0115185	-0.00429212		-0.0472	-0.00202636	-0.00194748	-0.00143782	-0.00908565	-0.00797739	-0.00379805
-0.047	0.000484924	0.00141007	0.00445031	0.012427	0.00960927	0.00671402		-0.047	0.000882721	0.00135855	0.00356851	0.00958618	0.0130943	0.00752081		-0.047	-0.0024113	-0.00289265	-0.00294913	-0.0141573	-0.0114649	-0.00428999		-0.047	-0.00201919	-0.00194195	-0.00143273	-0.00903508	-0.00795332	-0.00379104
-0.0468	0.000491747	0.00141605	0.00445935	0.0124446	0.00967266	0.00671585		-0.0468	0.000892119	0.00136402	0.00357432	0.00962858	0.0131245	0.00753209		-0.0468	-0.00240448	-0.00288667	-0.00294009	-0.0141397	-0.0114015	-0.00428816		-0.0468	-0.00200979	-0.00193649	-0.00142692	-0.00899268	-0.00792314	-0.00377976
-0.0466	0.000499002	0.00142262	0.00446564	0.0124577	0.00971625	0.00672194		-0.0466	0.000903258	0.00136767	0.00358023	0.00966472	0.013168	0.00754489		-0.0466	-0.00239722	-0.0028801	-0.0029338	-0.0141267	-0.0113579	-0.00428206		-0.0466	-0.00199865	-0.00193283	-0.001421	-0.00895653	-0.00787956	-0.00376696
-0.0464	0.000508477	0.00143154	0.00447182	0.012472	0.00973636	0.00672835		-0.0464	0.000911403	0.00136924	0.00358813	0.00969443	0.0132171	0.00755129		-0.0464	-0.00238775	-0.00287118	-0.00292763	-0.0141123	-0.0113378	-0.00427566		-0.0464	-0.00199051	-0.00193127	-0.00141311	-0.00892682	-0.00783048	-0.00376056
-0.0462	0.000523746	0.00144131	0.00447818	0.0124791	0.0097769	0.00674084		-0.0462	0.000920313	0.0013703	0.00359604	0.00972977	0.0132641	0.00756043		-0.0462	-0.00237248	-0.0028614	-0.00292126	-0.0141052	-0.0112972	-0.00426316		-0.0462	-0.0019816	-0.0019302	-0.0014052	-0.00889148	-0.00778355	-0.00375141
-0.046	0.000537012	0.00144871	0.00448448	0.012488	0.00981714	0.00675852		-0.046	0.000925883	0.00137294	0.00360105	0.00976724	0.0133022	0.00757903		-0.046	-0.00235921	-0.00285401	-0.00291496	-0.0140963	-0.011257	-0.00424549		-0.046	-0.00197603	-0.00192757	-0.00140018	-0.00885401	-0.00774545	-0.00373282
-0.0458	0.000548978	0.00146077	0.00449376	0.0125121	0.00984518	0.00677285		-0.0458	0.000928528	0.00137699	0.00360637	0.00980685	0.0133302	0.00760189		-0.0458	-0.00234725	-0.00284195	-0.00290568	-0.0140723	-0.0112289	-0.00423116		-0.0458	-0.00197338	-0.00192352	-0.00139487	-0.00881441	-0.0077174	-0.00370996
-0.0456	0.000561756	0.00147155	0.00450308	0.0125386	0.0098656	0.00677833		-0.0456	0.000932287	0.00138183	0.00361373	0.00985344	0.0133589	0.00762292		-0.0456	-0.00233447	-0.00283117	-0.00289636	-0.0140457	-0.0112085	-0.00422567		-0.0456	-0.00196962	-0.00191867	-0.00138751	-0.00876781	-0.00768875	-0.00368893
-0.0454	0.000575672	0.00148478	0.00451744	0.0125555	0.00988815	0.00678107		-0.0454	0.000938135	0.00138769	0.00362227	0.00989259	0.0133884	0.00763541		-0.0454	-0.00232055	-0.00281793	-0.002882	-0.0140288	-0.011186	-0.00422293		-0.0454	-0.00196378	-0.00191282	-0.00137897	-0.00872867	-0.00765919	-0.00367643
-0.0452	0.000589316	0.00150168	0.00452933	0.012577	0.00989516	0.00678717		-0.0452	0.000941198	0.00139266	0.00363279	0.00992331	0.0134149	0.00763968		-0.0452	-0.00230691	-0.00280103	-0.00287011	-0.0140073	-0.011179	-0.00421684		-0.0452	-0.00196071	-0.00190785	-0.00136844	-0.00869795	-0.00763267	-0.00367217
-0.045	0.000598683	0.00151626	0.00454264	0.0126064	0.00990156	0.00679388		-0.045	0.000945862	0.00139444	0.00364324	0.00996535	0.0134433	0.00764791		-0.045	-0.00229754	-0.00278646	-0.0028568	-0.0139779	-0.0111726	-0.00421013		-0.045	-0.00195605	-0.00190607	-0.001358	-0.00865591	-0.00760433	-0.00366394
-0.0448	0.000607888	0.00152497	0.00455488	0.0126401	0.00991528	0.00680515		-0.0448	0.000951571	0.00139771	0.00365219	0.0100119	0.0134686	0.00765919		-0.0448	-0.00228834	-0.00277774	-0.00284456	-0.0139442	-0.0111588	-0.00419885		-0.0448	-0.00195034	-0.00190279	-0.00134904	-0.00860938	-0.00757903	-0.00365266
-0.0446	0.000619962	0.00152909	0.00456912	0.0126763	0.00993265	0.00681491		-0.0446	0.000958184	0.00140267	0.00366155	0.010053	0.0134899	0.00767504		-0.0446	-0.00227626	-0.00277363	-0.00283032	-0.013908	-0.0111415	-0.0041891		-0.0446	-0.00194373	-0.00189783	-0.00133969	-0.00856824	-0.00755769	-0.00363681
-0.0444	0.000631279	0.00153286	0.00458462	0.0127096	0.0099482	0.00682161		-0.0444	0.000964589	0.00140768	0.00367254	0.0100816	0.0135176	0.00768814		-0.0444	-0.00226495	-0.00276986	-0.00281483	-0.0138747	-0.0111259	-0.00418239		-0.0444	-0.00193732	-0.00189283	-0.0013287	-0.00853962	-0.00752996	-0.00362371
-0.0442	0.000640321	0.00154063	0.00459627	0.0127591	0.00995429	0.00683045		-0.0442	0.000974683	0.00141106	0.003684	0.0100995	0.013549	0.00769942		-0.0442	-0.0022559	-0.00276208	-0.00280318	-0.0138252	-0.0111198	-0.00417355		-0.0442	-0.00192723	-0.00188944	-0.00131723	-0.00852174	-0.00749856	-0.00361243
-0.044	0.000651042	0.0015502	0.00460888	0.0128133	0.00995521	0.00684173		-0.044	0.000985264	0.00141356	0.00369997	0.0101206	0.0135841	0.00770765		-0.044	-0.00224518	-0.00275251	-0.00279056	-0.013771	-0.0111189	-0.00416228		-0.044	-0.00191665	-0.00188695	-0.00130127	-0.0085007	-0.00746351	-0.0036042
-0.0438	0.000660734	0.00156038	0.00461918	0.0128732	0.00996862	0.00685423		-0.0438	0.000995916	0.00141565	0.0037183	0.0101467	0.0136149	0.00771253		-0.0438	-0.00223549	-0.00274234	-0.00278026	-0.0137111	-0.0111055	-0.00414978		-0.0438	-0.001906	-0.00188485	-0.00128294	-0.00847456	-0.00743273	-0.00359932
-0.0436	0.000668368	0.00157039	0.00462767	0.0129167	0.00999635	0.00686489		-0.0436	0.00100427	0.0014173	0.00373251	0.010182	0.0136408	0.00772198		-0.0436	-0.00222786	-0.00273233	-0.00277177	-0.0136676	-0.0110778	-0.00413911		-0.0436	-0.00189764	-0.0018832	-0.00126873	-0.00843924	-0.00740682	-0.00358987
-0.0434	0.000678602	0.00158166	0.00463863	0.0129489	0.0100296	0.00687556		-0.0434	0.00101088	0.00141964	0.00374322	0.0102139	0.0136606	0.00773874		-0.0434	-0.00221762	-0.00272105	-0.00276081	-0.0136354	-0.0110445	-0.00412845		-0.0434	-0.00189103	-0.00188087	-0.00125802	-0.00840732	-0.00738701	-0.00357311
-0.0432	0.000690838	0.00158996	0.0046499	0.0129895	0.0100585	0.00688592		-0.0432	0.00102174	0.00142244	0.00375444	0.0102291	0.0136768	0.00775398		-0.0432	-0.00220539	-0.00271276	-0.00274954	-0.0135948	-0.0110156	-0.00411808		-0.0432	-0.00188017	-0.00187806	-0.00124679	-0.00839214	-0.00737085	-0.00355787
-0.043	0.000700422	0.00159865	0.00466347	0.0130221	0.0100893	0.0068969		-0.043	0.00103532	0.00142506	0.00376538	0.0102485	0.0136966	0.00776556		-0.043	-0.0021958	-0.00270406	-0.00273597	-0.0135622	-0.0109848	-0.00410711		-0.043	-0.00186659	-0.00187544	-0.00123585	-0.00837271	-0.00735104	-0.00354629
-0.0428	0.000705837	0.00160902	0.00467684	0.01306	0.0101213	0.00690695		-0.0428	0.00104771	0.00142826	0.0037778	0.0102738	0.0137203	0.00777379		-0.0428	-0.00219039	-0.00269369	-0.00272261	-0.0135243	-0.0109528	-0.00409705		-0.0428	-0.0018542	-0.00187225	-0.00122344	-0.00834741	-0.00732727	-0.00353806
-0.0426	0.000710656	0.00161944	0.00469284	0.0130989	0.0101585	0.0069164		-0.0426	0.00105585	0.00143272	0.00378869	0.0103084	0.0137447	0.0077869		-0.0426	-0.00218557	-0.00268327	-0.0027066	-0.0134855	-0.0109156	-0.0040876		-0.0426	-0.00184606	-0.00186779	-0.00121255	-0.00831286	-0.00730288	-0.00352495
-0.0424	0.000718615	0.00162812	0.00470498	0.0131347	0.0101969	0.00692738		-0.0424	0.00105954	0.00144038	0.0037991	0.0103495	0.0137725	0.00779848		-0.0424	-0.00217761	-0.00267459	-0.00269446	-0.0134496	-0.0108772	-0.00407663		-0.0424	-0.00184237	-0.00186013	-0.00120213	-0.00827174	-0.00727515	-0.00351337
-0.0422	0.000726141	0.0016377	0.00471502	0.0131909	0.0102161	0.0069414		-0.0422	0.00106525	0.00144664	0.00380895	0.0103902	0.0138042	0.00780884		-0.0422	-0.00217008	-0.00266501	-0.00268442	-0.0133935	-0.010858	-0.00406261		-0.0422	-0.00183666	-0.00185387	-0.00119229	-0.00823104	-0.00724345	-0.00350301
-0.042	0.000732205	0.00164746	0.00472536	0.0132446	0.010225	0.00694688		-0.042	0.00107256	0.00145023	0.00381648	0.0104186	0.013831	0.00781738		-0.042	-0.00216402	-0.00265526	-0.00267408	-0.0133397	-0.0108492	-0.00405712		-0.042	-0.00182935	-0.00185028	-0.00118476	-0.00820263	-0.00721663	-0.00349447
-0.0418	0.000736645	0.00165341	0.00473759	0.0132845	0.0102548	0.00695115		-0.0418	0.00107883	0.00145144	0.00382493	0.0104393	0.0138624	0.00782378		-0.0418	-0.00215958	-0.0026493	-0.00266185	-0.0132999	-0.0108193	-0.00405286		-0.0418	-0.00182308	-0.00184907	-0.0011763	-0.00818199	-0.00718523	-0.00348807
-0.0416	0.000740273	0.00165686	0.00474984	0.0133143	0.010278	0.00696487		-0.0416	0.00108474	0.00145113	0.00383226	0.0104541	0.013884	0.0078314		-0.0416	-0.00215595	-0.00264585	-0.0026496	-0.01327	-0.0107961	-0.00403914		-0.0416	-0.00181717	-0.00184938	-0.00116898	-0.0081672	-0.00716359	-0.00348045
-0.0414	0.000742872	0.00165872	0.00476159	0.0133564	0.0102957	0.00698224		-0.0414	0.00108927	0.00145089	0.00383878	0.010471	0.0138889	0.00784237		-0.0414	-0.00215335	-0.002644	-0.00263786	-0.0132279	-0.0107785	-0.00402177		-0.0414	-0.00181264	-0.00184961	-0.00116246	-0.00815028	-0.00715872	-0.00346948
-0.0412	0.000744713	0.0016602	0.00477132	0.0134211	0.0103225	0.00699321		-0.0412	0.00109136	0.00145042	0.0038456	0.010492	0.0138959	0.00785029		-0.0412	-0.00215151	-0.00264251	-0.00262812	-0.0131632	-0.0107516	-0.00401079		-0.0412	-0.00181055	-0.00185009	-0.00115563	-0.00812924	-0.00715171	-0.00346155
-0.041	0.000747745	0.00166559	0.00478326	0.0134802	0.0103749	0.00699809		-0.041	0.00109331	0.00145034	0.00385145	0.0105162	0.0139172	0.00785883		-0.041	-0.00214848	-0.00263712	-0.00261618	-0.0131042	-0.0106992	-0.00400592		-0.041	-0.0018086	-0.00185017	-0.00114978	-0.00810502	-0.00713037	-0.00345302
-0.0408	0.000750777	0.00167024	0.00479449	0.0135097	0.0104313	0.00700297		-0.0408	0.00109567	0.00145227	0.00385723	0.0105364	0.0139483	0.00787559		-0.0408	-0.00214545	-0.00263248	-0.00260495	-0.0130746	-0.0106428	-0.00400104		-0.0408	-0.00180624	-0.00184823	-0.001144	-0.00808484	-0.00709928	-0.00343626
-0.0406	0.000757166	0.00167744	0.00480523	0.0135277	0.0104932	0.00700815		-0.0406	0.00109811	0.00145482	0.00386551	0.0105509	0.0139855	0.00790059		-0.0406	-0.00213906	-0.00262528	-0.00259421	-0.0130567	-0.010581	-0.00399586		-0.0406	-0.0018038	-0.00184569	-0.00113572	-0.00807032	-0.0070621	-0.00341126
-0.0404	0.000766208	0.00168544	0.00481257	0.0135672	0.0105602	0.00701973		-0.0404	0.00110229	0.00145252	0.00387451	0.0105633	0.0140227	0.00792436		-0.0404	-0.00213002	-0.00261727	-0.00258687	-0.0130171	-0.0105139	-0.00398428		-0.0404	-0.00179962	-0.00184799	-0.00112672	-0.00805796	-0.00702491	-0.00338749
-0.0402	0.00077341	0.00169431	0.00482094	0.0136278	0.0106279	0.00704289		-0.0402	0.00111071	0.00145066	0.00388365	0.0105715	0.0140611	0.00793929		-0.0402	-0.00212282	-0.0026084	-0.00257851	-0.0129566	-0.0104462	-0.00396111		-0.0402	-0.0017912	-0.00184985	-0.00111758	-0.00804971	-0.00698651	-0.00337255
-0.04	0.000776442	0.00170549	0.00483587	0.0136998	0.0106882	0.00705874		-0.04	0.00111788	0.00145256	0.00389427	0.0105753	0.0140958	0.0079457		-0.04	-0.00211978	-0.00259722	-0.00256357	-0.0128845	-0.0103859	-0.00394526		-0.04	-0.00178403	-0.00184794	-0.00110697	-0.00804598	-0.00695176	-0.00336615
-0.0398	0.000779636	0.0017145	0.00485057	0.0137592	0.0107568	0.00705752		-0.0398	0.00112338	0.00145803	0.00390383	0.010585	0.0141221	0.00794844		-0.0398	-0.00211659	-0.00258821	-0.00254887	-0.0128251	-0.0103173	-0.00394648		-0.0398	-0.00177853	-0.00184248	-0.0010974	-0.00803625	-0.00692555	-0.00336341
-0.0396	0.00078608	0.0017219	0.00485972	0.0137937	0.0108251	0.00706149		-0.0396	0.00113542	0.00146725	0.0039142	0.0106039	0.0141431	0.00795362		-0.0396	-0.00211015	-0.00258082	-0.00253972	-0.0127906	-0.010249	-0.00394252		-0.0396	-0.00176649	-0.00183325	-0.00108703	-0.00801739	-0.00690452	-0.00335823
-0.0394	0.000792685	0.00172761	0.00486602	0.0138489	0.0109034	0.00707368		-0.0394	0.00115053	0.00147934	0.00392549	0.0106234	0.0141647	0.00796307		-0.0394	-0.00210354	-0.0025751	-0.00253342	-0.0127355	-0.0101707	-0.00393033		-0.0394	-0.00175138	-0.00182117	-0.00107575	-0.00799787	-0.00688288	-0.00334878
-0.0392	0.000797559	0.00173161	0.00486996	0.0139268	0.0109866	0.00709014		-0.0392	0.00116466	0.00148908	0.00393744	0.0106402	0.0141861	0.00797404		-0.0392	-0.00209867	-0.0025711	-0.00252948	-0.0126575	-0.0100875	-0.00391387		-0.0392	-0.00173725	-0.00181143	-0.0010638	-0.00798103	-0.00686154	-0.00333781
-0.039	0.000800699	0.00173614	0.00487527	0.0140229	0.0110342	0.00710964		-0.039	0.00117323	0.00149743	0.00394611	0.0106512	0.0142138	0.00798898		-0.039	-0.00209553	-0.00256657	-0.00252417	-0.0125614	-0.0100399	-0.00389436		-0.039	-0.00172869	-0.00180308	-0.00105513	-0.00797004	-0.0068338	-0.00332287
-0.0388	0.000803839	0.00173876	0.00488037	0.0141114	0.0110613	0.00713189		-0.0388	0.00117768	0.00150398	0.00395751	0.0106712	0.0142425	0.00800544		-0.0388	-0.00209239	-0.00256395	-0.00251907	-0.012473	-0.0100128	-0.00387211		-0.0388	-0.00172423	-0.00179652	-0.00104373	-0.00795006	-0.00680515	-0.00330641
-0.0386	0.000805897	0.00174283	0.00488481	0.0141701	0.0110869	0.00715292		-0.0386	0.00118576	0.00150909	0.00396846	0.0106967	0.0142687	0.00802586		-0.0386	-0.00209033	-0.00255989	-0.00251463	-0.0124142	-0.00998721	-0.00385108		-0.0386	-0.00171615	-0.00179142	-0.00103277	-0.00792459	-0.00677894	-0.00328599
-0.0384	0.000809579	0.0017468	0.00489529	0.0142204	0.0111204	0.00717822		-0.0384	0.00119515	0.0015157	0.00397582	0.0107259	0.0143031	0.00804445		-0.0384	-0.00208665	-0.00255591	-0.00250415	-0.0123639	-0.00995368	-0.00382578		-0.0384	-0.00170676	-0.00178481	-0.00102541	-0.00789535	-0.0067445	-0.0032674
-0.0382	0.000814452	0.00175206	0.00490604	0.0142932	0.0111573	0.00720047		-0.0382	0.00120393	0.00151813	0.00398392	0.0107465	0.01434	0.00805999		-0.0382	-0.00208177	-0.00255066	-0.00249341	-0.0122911	-0.0099168	-0.00380353		-0.0382	-0.00169799	-0.00178238	-0.00101732	-0.00787474	-0.00670762	-0.00325186
-0.038	0.00082409	0.00175734	0.00491569	0.0143761	0.0112024	0.00721571		-0.038	0.00121235	0.00151819	0.00399207	0.0107601	0.0143775	0.00807432		-0.038	-0.00207214	-0.00254537	-0.00248375	-0.0122083	-0.00987169	-0.00378829		-0.038	-0.00168956	-0.00178232	-0.00100917	-0.00786111	-0.00667013	-0.00323753
-0.0378	0.00083324	0.00176278	0.00492891	0.0144261	0.0112622	0.00722821		-0.0378	0.00121799	0.00152002	0.00399892	0.0107798	0.014407	0.00808621		-0.0378	-0.00206299	-0.00253993	-0.00247053	-0.0121582	-0.00981195	-0.0037758		-0.0378	-0.00168392	-0.00178049	-0.00100232	-0.00784149	-0.00664056	-0.00322564
-0.0376	0.000838222	0.00176749	0.00494821	0.0144695	0.0113402	0.00724558		-0.0376	0.00121959	0.00152333	0.00400521	0.0108093	0.0144351	0.008092		-0.0376	-0.002058	-0.00253522	-0.00245123	-0.0121148	-0.00973393	-0.00375842		-0.0376	-0.00168232	-0.00177718	-0.000996022	-0.00781194	-0.00661252	-0.00321985
-0.0374	0.000839954	0.00177313	0.00497035	0.0145259	0.0113914	0.0072596		-0.0374	0.00122217	0.00152629	0.00401098	0.0108453	0.0144573	0.00809108		-0.0374	-0.00205627	-0.00252959	-0.00242909	-0.0120584	-0.00968272	-0.0037444		-0.0374	-0.00167975	-0.00177421	-0.00099026	-0.00777596	-0.00659027	-0.00322077
-0.0372	0.000846289	0.00177747	0.00498591	0.0145797	0.0114292	0.0072785		-0.0372	0.00122836	0.00153041	0.00401923	0.0108859	0.0144741	0.00809474		-0.0372	-0.00204994	-0.00252525	-0.00241354	-0.0120046	-0.00964493	-0.00372551		-0.0372	-0.00167355	-0.00177009	-0.000982003	-0.00773535	-0.00657351	-0.00321711
-0.037	0.000853491	0.00178261	0.00499681	0.0146453	0.0114743	0.00730502		-0.037	0.00123553	0.00153528	0.00402816	0.0109371	0.0144866	0.00810236		-0.037	-0.00204274	-0.0025201	-0.00240263	-0.011939	-0.00959982	-0.00369899		-0.037	-0.00166638	-0.00176522	-0.000973079	-0.00768414	-0.00656101	-0.00320949
-0.0368	0.00085923	0.00178761	0.00501061	0.0147223	0.0115185	0.00732849		-0.0368	0.0012411	0.00153966	0.00403678	0.0109935	0.0144927	0.0081112		-0.0368	-0.002037	-0.0025151	-0.00238883	-0.011862	-0.00955562	-0.00367552		-0.0368	-0.00166081	-0.00176085	-0.000964451	-0.00762771	-0.00655492	-0.00320065
-0.0366	0.000862641	0.00179459	0.00502502	0.0148073	0.0115609	0.00736719		-0.0366	0.00124319	0.00154473	0.0040452	0.0110425	0.0145061	0.00811912		-0.0366	-0.00203358	-0.00250813	-0.00237443	-0.011777	-0.00951326	-0.00363681		-0.0366	-0.00165872	-0.00175578	-0.000956032	-0.00757873	-0.00654151	-0.00319273
-0.0364	0.000863561	0.00180307	0.00504098	0.0148736	0.0115984	0.0073931		-0.0364	0.00124507	0.00154863	0.00405432	0.0110895	0.0145171	0.0081237		-0.0364	-0.00203266	-0.00249964	-0.00235847	-0.0117107	-0.00947577	-0.0036109		-0.0364	-0.00165684	-0.00175188	-0.000946911	-0.00753173	-0.00653053	-0.00318815
-0.0362	0.000864753	0.00180977	0.00506266	0.0149133	0.0116325	0.00740773		-0.0362	0.00124813	0.00155107	0.00406141	0.0111176	0.014525	0.00812735		-0.0362	-0.00203147	-0.00249295	-0.00233679	-0.011671	-0.00944163	-0.00359627		-0.0362	-0.00165378	-0.00174944	-0.000939822	-0.00750362	-0.00652261	-0.0031845
-0.036	0.000868326	0.00181789	0.00508412	0.0149546	0.0116636	0.00741779		-0.036	0.00125064	0.00155622	0.0040695	0.0111363	0.0145207	0.00813192		-0.036	-0.0020279	-0.00248482	-0.00231533	-0.0116298	-0.00941054	-0.00358622		-0.036	-0.00165127	-0.00174429	-0.000931734	-0.00748492	-0.00652688	-0.00317992
-0.0358	0.000870817	0.00182709	0.00510415	0.0150287	0.011698	0.00742053		-0.0358	0.00125245	0.00156065	0.00407807	0.0111596	0.014521	0.0081365		-0.0358	-0.00202541	-0.00247562	-0.00229529	-0.0115556	-0.0093761	-0.00358347		-0.0358	-0.00164946	-0.00173986	-0.000923169	-0.00746161	-0.00652657	-0.00317535
-0.0356	0.000878072	0.0018364	0.00512326	0.0151192	0.0117248	0.00742053		-0.0356	0.00125516	0.00156551	0.0040836	0.0111833	0.0145283	0.00814137		-0.0356	-0.00201815	-0.00246632	-0.00227618	-0.0114651	-0.00934928	-0.00358347		-0.0356	-0.00164675	-0.001735	-0.000917632	-0.00743797	-0.00651926	-0.00317048
-0.0354	0.00088614	0.00184395	0.00514202	0.0152112	0.0117535	0.00742785		-0.0354	0.00125857	0.00156981	0.00408726	0.0112086	0.0145387	0.00814473		-0.0354	-0.00201009	-0.00245876	-0.00225742	-0.0113731	-0.00932062	-0.00357616		-0.0354	-0.00164334	-0.00173069	-0.00091398	-0.00741265	-0.00650889	-0.00316712
-0.0352	0.000892096	0.00185185	0.00515648	0.015303	0.0117925	0.00743577		-0.0352	0.00126233	0.00157531	0.00409354	0.0112296	0.0145457	0.00815235		-0.0352	-0.00200413	-0.00245087	-0.00224296	-0.0112813	-0.00928161	-0.00356823		-0.0352	-0.00163958	-0.0017252	-0.0009077	-0.00739165	-0.00650188	-0.0031595
-0.035	0.000894857	0.00186094	0.00516559	0.0153893	0.0118315	0.00745193		-0.035	0.00126588	0.0015787	0.00410193	0.011252	0.0145613	0.00816301		-0.035	-0.00200137	-0.00244178	-0.00223385	-0.011195	-0.0092426	-0.00355208		-0.035	-0.00163603	-0.0017218	-0.000899309	-0.00736928	-0.00648634	-0.00314883
-0.0348	0.000900001	0.00187036	0.00517708	0.0154733	0.0118593	0.00747083		-0.0348	0.00127257	0.00158371	0.00410738	0.0112673	0.0145722	0.00816972		-0.0348	-0.00199622	-0.00243236	-0.00222236	-0.011111	-0.00921486	-0.00353318		-0.0348	-0.00162934	-0.00171679	-0.00089386	-0.007354	-0.00647537	-0.00314213
-0.0346	0.000906661	0.00188272	0.00519018	0.015561	0.011883	0.00748363		-0.0346	0.00127653	0.00158723	0.00411215	0.0112772	0.0145741	0.00817886		-0.0346	-0.00198956	-0.00241999	-0.00220927	-0.0110233	-0.00919109	-0.00352038		-0.0346	-0.00162538	-0.00171327	-0.000889081	-0.00734409	-0.00647354	-0.00313299
-0.0344	0.000912996	0.00189811	0.00520188	0.015652	0.0119403	0.00749094		-0.0344	0.00128022	0.00158832	0.00411607	0.0112799	0.014568	0.00818984		-0.0344	-0.00198323	-0.0024046	-0.00219756	-0.0109323	-0.00913379	-0.00351306		-0.0344	-0.00162169	-0.00171219	-0.000885161	-0.00734137	-0.00647963	-0.00312201
-0.0342	0.000915812	0.00191685	0.00521582	0.015738	0.012029	0.00750069		-0.0342	0.00128774	0.00159173	0.00412073	0.0112798	0.0145744	0.00820294		-0.0342	-0.00198041	-0.00238587	-0.00218362	-0.0108463	-0.00904509	-0.00350331		-0.0342	-0.00161417	-0.00170878	-0.000880503	-0.00734146	-0.00647323	-0.00310891
-0.034	0.000920414	0.00193107	0.00522925	0.0158067	0.0121165	0.00751289		-0.034	0.00129735	0.00159233	0.00412732	0.0112774	0.0145875	0.00821148		-0.034	-0.00197581	-0.00237164	-0.00217019	-0.0107776	-0.00895761	-0.00349112		-0.034	-0.00160456	-0.00170818	-0.000873917	-0.00734388	-0.00646013	-0.00310037
-0.0338	0.000925504	0.00194326	0.00524099	0.0158819	0.0121497	0.00752691		-0.0338	0.00130828	0.00158576	0.00413538	0.0112772	0.0146036	0.00821818		-0.0338	-0.00197072	-0.00235945	-0.00215845	-0.0107024	-0.00892439	-0.0034771		-0.0338	-0.00159363	-0.00171475	-0.000865855	-0.00734405	-0.00644397	-0.00309367
-0.0336	0.000930106	0.00195828	0.00525462	0.0159754	0.0122089	0.00753666		-0.0336	0.00131705	0.00158021	0.00414156	0.0112874	0.0146131	0.00821818		-0.0336	-0.00196612	-0.00234444	-0.00214482	-0.0106089	-0.00886526	-0.00346735		-0.0336	-0.00158486	-0.00172029	-0.000859675	-0.00733386	-0.00643452	-0.00309367
-0.0334	0.000934383	0.00197253	0.00526423	0.0160494	0.0122838	0.00754977		-0.0334	0.00132436	0.00157932	0.00414941	0.0113002	0.0146186	0.00822001		-0.0334	-0.00196184	-0.00233019	-0.00213521	-0.010535	-0.00879028	-0.00345424		-0.0334	-0.00157755	-0.00172119	-0.000851821	-0.00732106	-0.00642904	-0.00309184
-0.0332	0.000936224	0.00198722	0.00527247	0.0160865	0.012357	0.00756196		-0.0332	0.00133056	0.00158043	0.00415555	0.0113196	0.0146201	0.00822489		-0.0332	-0.00196	-0.00231549	-0.00212697	-0.0104978	-0.00871713	-0.00344205		-0.0332	-0.00157136	-0.00172007	-0.000845682	-0.00730166	-0.00642751	-0.00308696
-0.033	0.000941531	0.00200361	0.00527834	0.016139	0.0124155	0.00757415		-0.033	0.00134107	0.0015813	0.00415752	0.0113363	0.0146152	0.00822397		-0.033	-0.0019547	-0.00229911	-0.0021211	-0.0104453	-0.00865861	-0.00342986		-0.033	-0.00156084	-0.0017192	-0.000843713	-0.00728492	-0.00643239	-0.00308788
-0.0328	0.000947595	0.00202048	0.005288	0.0162021	0.0124652	0.00758238		-0.0328	0.00135666	0.00158267	0.00416046	0.0113635	0.0146058	0.00822245		-0.0328	-0.00194863	-0.00228223	-0.00211144	-0.0103822	-0.00860893	-0.00342163		-0.0328	-0.00154525	-0.00171783	-0.000840774	-0.00725776	-0.00644184	-0.0030894
-0.0326	0.000951168	0.00203581	0.00529801	0.0162622	0.012506	0.00759549		-0.0326	0.00137065	0.00158504	0.00416244	0.0113999	0.0145969	0.00822519		-0.0326	-0.00194506	-0.0022669	-0.00210144	-0.0103221	-0.00856809	-0.00340852		-0.0326	-0.00153126	-0.00171546	-0.000838797	-0.00722134	-0.00645068	-0.00308666
-0.0324	0.000954904	0.0020492	0.0053073	0.0163206	0.0125353	0.0076092		-0.0324	0.00137483	0.00158657	0.00416501	0.011439	0.0145914	0.00823342		-0.0324	-0.00194132	-0.00225352	-0.00209214	-0.0102637	-0.00853883	-0.0033948		-0.0324	-0.00152708	-0.00171394	-0.000836227	-0.00718223	-0.00645616	-0.00307843
-0.0322	0.000958261	0.0020578	0.00532014	0.0163599	0.0125594	0.0076281		-0.0322	0.00138458	0.00158608	0.00416904	0.0114753	0.0145887	0.0082386		-0.0322	-0.00193796	-0.00224492	-0.00207931	-0.0102244	-0.00851475	-0.00337591		-0.0322	-0.00151733	-0.00171443	-0.000832196	-0.00714598	-0.00645891	-0.00307325
-0.032	0.000959615	0.00206767	0.00533451	0.0163826	0.012588	0.00765462		-0.032	0.00139913	0.00158357	0.00417465	0.0115046	0.0145847	0.00823952		-0.032	-0.00193661	-0.00223505	-0.00206493	-0.0102017	-0.0084861	-0.00334939		-0.032	-0.00150278	-0.00171693	-0.000826588	-0.00711669	-0.00646287	-0.00307233
-0.0318	0.000960211	0.00207672	0.00535423	0.0164236	0.0126188	0.00768174		-0.0318	0.00141451	0.00158129	0.00418057	0.0115309	0.0145796	0.00824013		-0.0318	-0.00193602	-0.002226	-0.00204521	-0.0101607	-0.00845531	-0.00332226		-0.0318	-0.0014874	-0.00171922	-0.000820666	-0.00709034	-0.00646805	-0.00307172
-0.0316	0.000961131	0.00208331	0.00537094	0.0165012	0.0126414	0.00770796		-0.0316	0.00142593	0.00158083	0.00418235	0.0115649	0.0145707	0.00823647		-0.0316	-0.00193509	-0.00221941	-0.0020285	-0.0100831	-0.00843276	-0.00329605		-0.0316	-0.00147598	-0.00171967	-0.00081889	-0.00705639	-0.00647689	-0.00307538
-0.0314	0.00096373	0.00209297	0.0053864	0.016566	0.0126618	0.00772472		-0.0314	0.00143414	0.00158084	0.00418284	0.0115981	0.0145616	0.0082319		-0.0314	-0.0019325	-0.00220974	-0.00201304	-0.0100183	-0.00841234	-0.00327929		-0.0314	-0.00146777	-0.00171967	-0.000818394	-0.00702317	-0.00648603	-0.00307995
-0.0312	0.000967466	0.002102	0.00540262	0.0166189	0.012709	0.00773112		-0.0312	0.0014473	0.00158283	0.00419045	0.0116366	0.0145546	0.00823677		-0.0312	-0.00192876	-0.00220072	-0.00199682	-0.00996544	-0.00836509	-0.00327289		-0.0312	-0.00145461	-0.00171768	-0.000810789	-0.00698469	-0.00649304	-0.00307507
-0.031	0.000972881	0.00210819	0.00542284	0.0166723	0.0127758	0.00773264		-0.031	0.00146171	0.00158739	0.00419639	0.0116674	0.014554	0.00824805		-0.031	-0.00192335	-0.00219452	-0.0019766	-0.00991203	-0.00829834	-0.00327136		-0.031	-0.0014402	-0.00171312	-0.000804845	-0.00695381	-0.00649365	-0.0030638
-0.0308	0.000977429	0.00211173	0.00543973	0.0167231	0.0128565	0.00773691		-0.0308	0.00147473	0.00159058	0.00420309	0.0116887	0.014561	0.00825811		-0.0308	-0.0019188	-0.00219098	-0.00195971	-0.00986124	-0.00821757	-0.0032671		-0.0308	-0.00142718	-0.00170993	-0.00079814	-0.00693251	-0.00648664	-0.00305374
-0.0306	0.000981219	0.0021186	0.00545334	0.0167724	0.0129315	0.00774301		-0.0306	0.00148837	0.0015943	0.00421541	0.0117072	0.0145661	0.00826847		-0.0306	-0.00191501	-0.00218411	-0.0019461	-0.00981196	-0.00814259	-0.003261		-0.0306	-0.00141354	-0.0017062	-0.000785825	-0.00691401	-0.00648146	-0.00304338
-0.0304	0.000983656	0.00212967	0.00546222	0.0168421	0.0129904	0.00775306		-0.0304	0.00149708	0.00160131	0.00422456	0.0117372	0.0145655	0.00828097		-0.0304	-0.00191257	-0.00217305	-0.00193723	-0.00974219	-0.00808377	-0.00325094		-0.0304	-0.00140484	-0.00169919	-0.000776673	-0.0068841	-0.00648207	-0.00303088
-0.0302	0.000987825	0.00214049	0.00547077	0.0169	0.0130397	0.00776465		-0.0302	0.00150292	0.00160981	0.00422529	0.0117656	0.0145582	0.00829834		-0.0302	-0.0019084	-0.00216223	-0.00192867	-0.00968427	-0.00803439	-0.00323936		-0.0302	-0.00139899	-0.00169069	-0.000775945	-0.00685569	-0.00648939	-0.00301351
-0.03	0.000996271	0.00214676	0.00547948	0.016955	0.0130919	0.00778964		-0.03	0.00151065	0.00161753	0.00423078	0.0117985	0.0145543	0.0083148		-0.03	-0.00189995	-0.00215596	-0.00191996	-0.00962935	-0.00798227	-0.00321437		-0.03	-0.00139126	-0.00168298	-0.000770456	-0.00682275	-0.00649335	-0.00299705
-0.0298	0.00100623	0.00215818	0.00549101	0.0170186	0.0131513	0.00782378		-0.0298	0.00151914	0.00162065	0.00423623	0.0118287	0.0145436	0.00833278		-0.0298	-0.00188999	-0.00214454	-0.00190843	-0.00956573	-0.00792284	-0.00318023		-0.0298	-0.00138277	-0.00167986	-0.000765002	-0.00679253	-0.00650402	-0.00297906
-0.0296	0.00101685	0.00217376	0.00550875	0.0170713	0.0132147	0.00785487		-0.0296	0.00152778	0.00162441	0.00424304	0.0118484	0.0145299	0.00835534		-0.0296	-0.00187938	-0.00212896	-0.00189069	-0.00951302	-0.00785944	-0.00314914		-0.0296	-0.00137414	-0.0016761	-0.000758193	-0.00677282	-0.00651773	-0.00295651
-0.0294	0.00102518	0.00218979	0.0055264	0.0171102	0.0132686	0.00787315		-0.0294	0.00153369	0.00163111	0.00425416	0.0118603	0.0145101	0.00837942		-0.0294	-0.00187104	-0.00211293	-0.00187304	-0.00947411	-0.00780549	-0.00313085		-0.0294	-0.00136822	-0.0016694	-0.000747071	-0.00676096	-0.00653754	-0.00293243
-0.0292	0.00103027	0.00220193	0.00554123	0.017149	0.013304	0.00788413		-0.0292	0.00153829	0.00163681	0.00426423	0.011874	0.0144899	0.00839771		-0.0292	-0.00186595	-0.00210079	-0.00185821	-0.00943536	-0.00777013	-0.00311988		-0.0292	-0.00136362	-0.0016637	-0.000737007	-0.00674726	-0.00655766	-0.00291414
-0.029	0.00104165	0.00221219	0.00555067	0.0171765	0.0133378	0.00790485		-0.029	0.00154149	0.00163773	0.00427093	0.0118943	0.0144692	0.0084163		-0.029	-0.00185458	-0.00209053	-0.00184878	-0.00940786	-0.0077363	-0.00309915		-0.029	-0.00136042	-0.00166278	-0.000730302	-0.00672693	-0.00657839	-0.00289555
-0.0288	0.0010606	0.00221961	0.00556108	0.0172038	0.0133802	0.00793137		-0.0288	0.0015449	0.00164307	0.00427598	0.0119019	0.014454	0.00843093		-0.0288	-0.00183563	-0.0020831	-0.00183836	-0.00938053	-0.00769394	-0.00307264		-0.0288	-0.00135701	-0.00165743	-0.00072526	-0.0067194	-0.00659363	-0.00288092
-0.0286	0.00108258	0.00222692	0.00556985	0.01722	0.013432	0.00794752		-0.0286	0.00154783	0.00165566	0.00427519	0.0119057	0.0144479	0.00844068		-0.0286	-0.00181365	-0.00207579	-0.00182959	-0.00936433	-0.00764212	-0.00305648		-0.0286	-0.00135409	-0.00164485	-0.000726041	-0.00671551	-0.00659972	-0.00287117
-0.0284	0.00110018	0.00223558	0.0055785	0.0172536	0.0134954	0.00796947		-0.0284	0.00155179	0.00166999	0.00427494	0.011912	0.0144406	0.00845165		-0.0284	-0.00179605	-0.00206713	-0.00182095	-0.00933073	-0.00757872	-0.00303454		-0.0284	-0.00135012	-0.00163051	-0.000726296	-0.00670923	-0.00660704	-0.00286019
-0.0282	0.00110732	0.00224611	0.00558935	0.0173245	0.0135625	0.00799903		-0.0282	0.0015582	0.00168285	0.00427538	0.0119274	0.0144363	0.00846415		-0.0282	-0.0017889	-0.0020566	-0.00181009	-0.00925977	-0.00751167	-0.00300497		-0.0282	-0.00134371	-0.00161766	-0.000725854	-0.00669385	-0.0066113	-0.0028477
-0.028	0.00111934	0.0022573	0.0055973	0.0174136	0.0136289	0.00802921		-0.028	0.00156467	0.00169533	0.00428102	0.0119475	0.0144333	0.00847634		-0.028	-0.00177688	-0.00204542	-0.00180214	-0.00917072	-0.00744522	-0.0029748		-0.028	-0.00133724	-0.00160518	-0.000720216	-0.00667374	-0.00661435	-0.00283551
-0.0278	0.00113802	0.00226699	0.00560745	0.0175034	0.0136822	0.00805268		-0.0278	0.00156878	0.0017012	0.00428612	0.0119674	0.0144314	0.0084864		-0.0278	-0.0017582	-0.00203573	-0.001792	-0.00908093	-0.00739188	-0.00295133		-0.0278	-0.00133313	-0.0015993	-0.000715118	-0.0066539	-0.00661618	-0.00282545
-0.0276	0.00115692	0.00227724	0.00561617	0.0175895	0.0137347	0.00807767		-0.0276	0.00157149	0.00171014	0.00428558	0.0119871	0.0144342	0.00849311		-0.0276	-0.00173931	-0.00202547	-0.00178327	-0.00899479	-0.00733946	-0.00292633		-0.0276	-0.00133042	-0.00159037	-0.000715656	-0.00663419	-0.00661344	-0.00281874
-0.0274	0.00116937	0.00228458	0.00562943	0.0176589	0.0137853	0.00809596		-0.0274	0.00157233	0.00172323	0.00428754	0.012004	0.0144439	0.00850408		-0.0274	-0.00172685	-0.00201814	-0.00177001	-0.00892546	-0.00728886	-0.00290805		-0.0274	-0.00132958	-0.00157728	-0.000713692	-0.00661723	-0.00660368	-0.00280777
-0.0272	0.00117408	0.00228946	0.00563844	0.0177574	0.0138255	0.00810998		-0.0272	0.00157449	0.00173542	0.00428818	0.0120328	0.0144555	0.0085178		-0.0272	-0.00172214	-0.00201325	-0.00176101	-0.00882692	-0.00724863	-0.00289403		-0.0272	-0.00132742	-0.00156508	-0.00071305	-0.00658848	-0.0065921	-0.00279405
-0.027	0.00118453	0.00230001	0.00564855	0.0178803	0.0138666	0.0081176		-0.027	0.00157706	0.0017468	0.00428997	0.0120688	0.0144714	0.00853822		-0.027	-0.00171169	-0.0020027	-0.00175089	-0.00870404	-0.00720748	-0.00288641		-0.027	-0.00132485	-0.00155371	-0.000711266	-0.00655247	-0.00657625	-0.00277363
-0.0268	0.00119504	0.00231487	0.00565662	0.0179935	0.0139319	0.00812857		-0.0268	0.00158166	0.00175626	0.00428741	0.0121108	0.0144887	0.00855833		-0.0268	-0.00170119	-0.00198784	-0.00174283	-0.00859083	-0.00714226	-0.00287543		-0.0268	-0.00132025	-0.00154425	-0.000713821	-0.00651047	-0.00655888	-0.00275352
-0.0266	0.00120159	0.00232793	0.00566617	0.0180676	0.0140084	0.00814076		-0.0266	0.0015857	0.0017654	0.00428126	0.0121486	0.0145015	0.00857936		-0.0266	-0.00169464	-0.00197479	-0.00173327	-0.0085167	-0.00706575	-0.00286324		-0.0266	-0.00131622	-0.00153511	-0.00071997	-0.00647268	-0.00654608	-0.00273249
-0.0264	0.00120776	0.00234368	0.00567898	0.018107	0.0140663	0.00815265		-0.0264	0.0015882	0.00177499	0.00427701	0.0121996	0.0145012	0.0086007		-0.0264	-0.00168846	-0.00195904	-0.00172046	-0.00847736	-0.00700784	-0.00285136		-0.0264	-0.00131371	-0.00152551	-0.000724224	-0.00642167	-0.00654638	-0.00271115
-0.0262	0.00121307	0.00236329	0.00569347	0.0181449	0.0141141	0.0081682		-0.0262	0.00158932	0.00178359	0.00427333	0.0122521	0.0145104	0.00861929		-0.0262	-0.00168316	-0.00193943	-0.00170597	-0.0084394	-0.00695999	-0.00283581		-0.0262	-0.0013126	-0.00151691	-0.000727906	-0.00636912	-0.00653724	-0.00269256
-0.026	0.00121735	0.00238396	0.00570758	0.0182108	0.0141943	0.00818648		-0.026	0.00159078	0.0017904	0.00427	0.0122835	0.0145491	0.00863849		-0.026	-0.00167888	-0.00191876	-0.00169186	-0.00837355	-0.00687983	-0.00281752		-0.026	-0.00131113	-0.00151011	-0.00073124	-0.00633777	-0.00649853	-0.00267336
-0.0258	0.00122005	0.00240253	0.00572337	0.0182798	0.0142745	0.0082069		-0.0258	0.00159419	0.00179766	0.00426739	0.0123087	0.0145948	0.00865587		-0.0258	-0.00167617	-0.00190019	-0.00167607	-0.00830453	-0.00679967	-0.0027971		-0.0258	-0.00130772	-0.00150285	-0.000733848	-0.00631253	-0.00645281	-0.00265598
-0.0256	0.00122152	0.00241464	0.00573789	0.0183375	0.0143577	0.00822794		-0.0256	0.00159878	0.00180438	0.00426795	0.012345	0.0146256	0.00867598		-0.0256	-0.00167471	-0.00188807	-0.00166155	-0.00824684	-0.00671646	-0.00277607		-0.0256	-0.00130313	-0.00149613	-0.000733284	-0.00627629	-0.00642203	-0.00263587
-0.0254	0.00122476	0.00243082	0.0057487	0.0183937	0.0144424	0.00824775		-0.0254	0.00160066	0.00181406	0.00426831	0.0123991	0.0146445	0.0086964		-0.0254	-0.00167146	-0.0018719	-0.00165074	-0.00819066	-0.00663173	-0.00275626		-0.0254	-0.00130125	-0.00148645	-0.000732928	-0.00622218	-0.00640313	-0.00261544
-0.0252	0.00123018	0.00244968	0.00575584	0.0184588	0.0145268	0.00826786		-0.0252	0.00160428	0.0018226	0.00426986	0.012469	0.014653	0.00871164		-0.0252	-0.00166605	-0.00185303	-0.0016436	-0.00812552	-0.0065473	-0.00273614		-0.0252	-0.00129763	-0.00147791	-0.000731376	-0.00615225	-0.0063946	-0.0026002
-0.025	0.001235	0.00246396	0.00576385	0.0185095	0.0146152	0.00828828		-0.025	0.00160595	0.00182983	0.00427226	0.0125347	0.0146679	0.00872902		-0.025	-0.00166123	-0.00183876	-0.00163559	-0.00807477	-0.00645891	-0.00271572		-0.025	-0.00129596	-0.00147067	-0.000728978	-0.00608657	-0.00637966	-0.00258283
-0.0248	0.00123711	0.00247505	0.00577605	0.0185487	0.0146963	0.00830505		-0.0248	0.00161083	0.00183538	0.00427777	0.012591	0.0146856	0.00875919		-0.0248	-0.00165912	-0.00182767	-0.0016234	-0.00803563	-0.00637783	-0.00269896		-0.0248	-0.00129108	-0.00146513	-0.000723463	-0.0060303	-0.00636198	-0.00255266
-0.0246	0.00123911	0.00248528	0.00578675	0.0186076	0.0147612	0.00832029		-0.0246	0.00161981	0.00183888	0.00428746	0.012634	0.014707	0.00878845		-0.0246	-0.00165711	-0.00181744	-0.00161269	-0.0079767	-0.00631291	-0.00268372		-0.0246	-0.0012821	-0.00146163	-0.000713778	-0.00598722	-0.00634065	-0.0025234
-0.0244	0.00124491	0.00249485	0.0057968	0.0186796	0.0148359	0.00833675		-0.0244	0.00162238	0.00184185	0.00429385	0.0126763	0.0147231	0.00880918		-0.0244	-0.00165132	-0.00180786	-0.00160264	-0.00790467	-0.00623824	-0.00266726		-0.0244	-0.00127953	-0.00145865	-0.000707387	-0.00594496	-0.00632449	-0.00250267
-0.0242	0.0012507	0.00250265	0.00581005	0.0187489	0.0148999	0.00835382		-0.0242	0.00163429	0.00184521	0.00429864	0.0127207	0.0147435	0.0088299		-0.0242	-0.00164553	-0.00180007	-0.00158939	-0.00783546	-0.00617423	-0.00265019		-0.0242	-0.00126762	-0.00145529	-0.0007026	-0.0059006	-0.00630407	-0.00248194
-0.024	0.00125492	0.00250871	0.00582348	0.0188165	0.0149511	0.00836723		-0.024	0.00165016	0.00184824	0.00429823	0.012766	0.0147667	0.00885276		-0.024	-0.0016413	-0.00179401	-0.00157596	-0.00776785	-0.00612302	-0.00263678		-0.024	-0.00125175	-0.00145226	-0.000703007	-0.00585524	-0.00628091	-0.00245908
-0.0238	0.00125812	0.00251623	0.00583294	0.0188829	0.0150078	0.0083785		-0.0238	0.00166179	0.00185211	0.00429594	0.0128148	0.014785	0.00887806		-0.0238	-0.00163811	-0.00178648	-0.00156651	-0.00770145	-0.00606633	-0.0026255		-0.0238	-0.00124013	-0.0014484	-0.000705294	-0.00580647	-0.00626262	-0.00243379
-0.0236	0.00126077	0.00252516	0.00584115	0.0189402	0.0150834	0.00838612		-0.0236	0.00166457	0.00185807	0.00429555	0.0128628	0.0147917	0.00889848		-0.0236	-0.00163546	-0.00177756	-0.0015583	-0.0076441	-0.00599074	-0.00261788		-0.0236	-0.00123734	-0.00144243	-0.000705683	-0.00575841	-0.00625591	-0.00241337
-0.0234	0.00126526	0.0025319	0.00585073	0.0189793	0.0151611	0.00839344		-0.0234	0.00167056	0.00186591	0.00429354	0.0129241	0.0147865	0.00891951		-0.0234	-0.00163096	-0.00177081	-0.00154872	-0.00760501	-0.00591302	-0.00261057		-0.0234	-0.00123135	-0.00143459	-0.000707698	-0.00569716	-0.00626109	-0.00239233
-0.0232	0.00127182	0.00253683	0.00586093	0.0189988	0.015226	0.00840075		-0.0232	0.00168002	0.0018715	0.00429723	0.0129758	0.0147819	0.00893719		-0.0232	-0.00162441	-0.00176588	-0.00153851	-0.00758554	-0.0058481	-0.00260325		-0.0232	-0.00122189	-0.00142901	-0.000704	-0.00564548	-0.00626567	-0.00237466
-0.023	0.00127864	0.00254558	0.00587415	0.0190293	0.0152696	0.00840837		-0.023	0.00168859	0.00187438	0.00430314	0.0130298	0.0147883	0.00895609		-0.023	-0.00161759	-0.00175714	-0.00152529	-0.00755501	-0.00580451	-0.00259563		-0.023	-0.00121332	-0.00142612	-0.000698091	-0.00559141	-0.00625927	-0.00235576
-0.0228	0.00128394	0.002557	0.00588588	0.0190805	0.0153245	0.00841782		-0.0228	0.00169854	0.00187963	0.00430768	0.013076	0.0147996	0.00897621		-0.0228	-0.00161228	-0.00174571	-0.00151356	-0.00750382	-0.00574965	-0.00258618		-0.0228	-0.00120337	-0.00142087	-0.000693557	-0.00554523	-0.00624799	-0.00233564
-0.0226	0.00129033	0.00256626	0.00589669	0.0191527	0.0153873	0.00842758		-0.0226	0.00170704	0.00188483	0.00430899	0.0131347	0.0148188	0.00900547		-0.0226	-0.00160589	-0.00173646	-0.00150275	-0.00743159	-0.00568686	-0.00257643		-0.0226	-0.00119488	-0.00141568	-0.000692248	-0.00548657	-0.00622879	-0.00230638
-0.0224	0.00129624	0.00257312	0.00590932	0.0192202	0.0154525	0.00843824		-0.0224	0.00171198	0.00189371	0.00431052	0.0131966	0.0148377	0.00903503		-0.0224	-0.00159999	-0.00172959	-0.00149012	-0.00736414	-0.00562164	-0.00256576		-0.0224	-0.00118993	-0.0014068	-0.000690716	-0.00542467	-0.00620989	-0.00227682
-0.0222	0.00130306	0.00257942	0.00591812	0.0192677	0.0155159	0.008448		-0.0222	0.0017126	0.0019034	0.00430949	0.0132596	0.0148554	0.00906338		-0.0222	-0.00159317	-0.0017233	-0.00148133	-0.00731662	-0.00555824	-0.00255601		-0.0222	-0.00118931	-0.0013971	-0.000691748	-0.00536168	-0.00619221	-0.00224847
-0.022	0.00131475	0.00258503	0.00592501	0.0193059	0.0155717	0.00845958		-0.022	0.00171629	0.00191021	0.00430917	0.0133091	0.014885	0.00908624		-0.022	-0.00158147	-0.00171769	-0.00147443	-0.00727841	-0.00550246	-0.00254443		-0.022	-0.00118562	-0.0013903	-0.000692069	-0.00531211	-0.00616265	-0.00222561
-0.0218	0.00132585	0.0025885	0.00593723	0.0193447	0.0156232	0.00847482		-0.0218	0.00172103	0.00191643	0.00430716	0.0133508	0.0149234	0.00909934		-0.0218	-0.00157037	-0.00171422	-0.00146222	-0.0072396	-0.00545095	-0.00252919		-0.0218	-0.00118088	-0.00138408	-0.000694075	-0.00527041	-0.00612424	-0.00221251
-0.0216	0.00132932	0.0025945	0.00595049	0.01939	0.0156546	0.00849676		-0.0216	0.001725	0.00192422	0.00430574	0.0133879	0.0149807	0.00912037		-0.0216	-0.00156691	-0.00170821	-0.00144895	-0.00719431	-0.00541956	-0.00250724		-0.0216	-0.00117692	-0.00137628	-0.000695493	-0.00523339	-0.00606694	-0.00219147
-0.0214	0.00134437	0.00260364	0.00596324	0.0194388	0.0156658	0.00852176		-0.0214	0.00172799	0.00193027	0.00430654	0.0134306	0.0150364	0.00914293		-0.0214	-0.00155186	-0.00169907	-0.0014362	-0.00714557	-0.00540828	-0.00248225		-0.0214	-0.00117392	-0.00137023	-0.000694699	-0.00519062	-0.00601116	-0.00216892
-0.0212	0.00136782	0.00261264	0.00597717	0.0194811	0.0156765	0.00854797		-0.0212	0.00172952	0.00193482	0.00430568	0.0134838	0.01508	0.00916945		-0.0212	-0.00152841	-0.00169008	-0.00142227	-0.0071032	-0.00539761	-0.00245604		-0.0212	-0.00117239	-0.00136569	-0.000695551	-0.00513749	-0.00596758	-0.0021424
-0.021	0.00138807	0.00261796	0.00599246	0.0195335	0.0157049	0.00857113		-0.021	0.00172973	0.00193915	0.00430442	0.0135327	0.0151151	0.009192		-0.021	-0.00150816	-0.00168475	-0.00140699	-0.00705078	-0.00536927	-0.00243287		-0.021	-0.00117218	-0.00136135	-0.000696817	-0.00508857	-0.00593253	-0.00211985
-0.0208	0.00140214	0.00262767	0.00600469	0.0195982	0.0157341	0.00858942		-0.0208	0.00173077	0.00194596	0.00430381	0.0135695	0.0151486	0.00921029		-0.0208	-0.00149408	-0.00167505	-0.00139475	-0.00698616	-0.00534	-0.00241458		-0.0208	-0.00117114	-0.00135455	-0.000697424	-0.00505171	-0.005899	-0.00210156
-0.0206	0.00141162	0.00263942	0.0060153	0.0196638	0.0157612	0.00860801		-0.0206	0.00173251	0.0019529	0.00430429	0.0136001	0.0151827	0.00922766		-0.0206	-0.00148461	-0.0016633	-0.00138415	-0.00692056	-0.00531288	-0.00239599		-0.0206	-0.0011694	-0.00134761	-0.000696941	-0.0050212	-0.00586486	-0.00208419
-0.0204	0.0014257	0.00265356	0.00603417	0.0197138	0.0157896	0.00862569		-0.0204	0.00173474	0.00195747	0.00430814	0.013634	0.0152172	0.00924412		-0.0204	-0.00147053	-0.00164915	-0.00136527	-0.0068705	-0.00528453	-0.00237831		-0.0204	-0.00116717	-0.00134304	-0.000693097	-0.00498723	-0.00583042	-0.00206773
-0.0202	0.00144232	0.00266577	0.00604751	0.0197598	0.0158326	0.0086452		-0.0202	0.00173739	0.0019647	0.00431345	0.0136669	0.0152589	0.00926515		-0.0202	-0.00145391	-0.00163695	-0.00135193	-0.0068245	-0.00524156	-0.00235881		-0.0202	-0.00116452	-0.00133581	-0.000687787	-0.00495434	-0.00578866	-0.0020467
-0.02	0.001463	0.00267796	0.00606104	0.0198176	0.0158768	0.00866684		-0.02	0.00173941	0.00197606	0.00431602	0.0137041	0.015305	0.00929167		-0.02	-0.00143322	-0.00162476	-0.0013384	-0.00676668	-0.00519736	-0.00233717		-0.02	-0.0011625	-0.00132444	-0.000685215	-0.00491717	-0.00574264	-0.00202018
-0.0198	0.0014825	0.00268797	0.00607381	0.0198658	0.0159197	0.00869183		-0.0198	0.00174156	0.00198735	0.00431708	0.0137438	0.0153446	0.00931361		-0.0198	-0.00141373	-0.00161475	-0.00132563	-0.00671857	-0.00515438	-0.00231217		-0.0198	-0.00116035	-0.00131316	-0.000684158	-0.00487748	-0.00570302	-0.00199823
-0.0196	0.00149295	0.00269748	0.00608581	0.019922	0.0159633	0.00871865		-0.0196	0.00174386	0.00199584	0.00431876	0.0137758	0.0153754	0.00932733		-0.0196	-0.00140328	-0.00160523	-0.00131363	-0.00666229	-0.0051108	-0.00228535		-0.0196	-0.00115805	-0.00130466	-0.000682475	-0.00484548	-0.00567223	-0.00198452
-0.0194	0.00149879	0.00270747	0.00609819	0.0199815	0.0160069	0.00874639		-0.0194	0.00174637	0.00200288	0.00432103	0.0138155	0.0153952	0.00934745		-0.0194	-0.00139743	-0.00159525	-0.00130125	-0.00660284	-0.00506721	-0.00225761		-0.0194	-0.00115554	-0.00129762	-0.000680203	-0.00480576	-0.00565242	-0.0019644
-0.0192	0.0015074	0.00271886	0.00611256	0.0200474	0.0160572	0.00877321		-0.0192	0.0017541	0.00200892	0.00432449	0.0138624	0.015419	0.00937214		-0.0192	-0.00138882	-0.00158385	-0.00128688	-0.00653695	-0.00501692	-0.00223079		-0.0192	-0.00114782	-0.00129159	-0.000676746	-0.00475886	-0.00562865	-0.00193971
-0.019	0.0015152	0.00272946	0.00613226	0.0201083	0.0161105	0.00879851		-0.019	0.00176266	0.00201193	0.00432631	0.0139099	0.0154394	0.00939591		-0.019	-0.00138103	-0.00157325	-0.00126719	-0.00647604	-0.00496358	-0.00220549		-0.019	-0.00113925	-0.00128858	-0.000674928	-0.00471135	-0.00560822	-0.00191594
-0.0188	0.00152143	0.00274108	0.00614816	0.0201736	0.0161541	0.00882076		-0.0188	0.00177442	0.00201601	0.00432855	0.0139502	0.0154604	0.00941542		-0.0188	-0.0013748	-0.00156164	-0.00125129	-0.00641073	-0.00492	-0.00218324		-0.0188	-0.00112749	-0.00128449	-0.000672682	-0.00467102	-0.00558719	-0.00189643
-0.0186	0.00152522	0.00275596	0.00616025	0.0202499	0.0162032	0.008836		-0.0186	0.00178584	0.00201997	0.00432851	0.0139992	0.0154857	0.00942791		-0.0186	-0.00137101	-0.00154675	-0.00123919	-0.0063344	-0.00487093	-0.002168		-0.0186	-0.00111607	-0.00128054	-0.000672722	-0.00462203	-0.0055619	-0.00188394
-0.0184	0.00152852	0.00277004	0.00617305	0.0203271	0.0162565	0.00884332		-0.0184	0.00179454	0.0020253	0.00432894	0.0140558	0.0155101	0.00943949		-0.0184	-0.00136771	-0.00153268	-0.0012264	-0.00625718	-0.00481759	-0.00216069		-0.0184	-0.00110737	-0.00127521	-0.000672295	-0.00456541	-0.00553751	-0.00187235
-0.0182	0.00153193	0.00278316	0.00618209	0.0204032	0.0163202	0.00884423		-0.0182	0.00180269	0.00203237	0.00433048	0.0141157	0.0155299	0.00945412		-0.0182	-0.0013643	-0.00151956	-0.00121735	-0.0061811	-0.00475388	-0.00215978		-0.0182	-0.00109922	-0.00126814	-0.000670751	-0.00450555	-0.0055177	-0.00185772
-0.018	0.00153529	0.00279225	0.0061958	0.0204824	0.0163839	0.00885185		-0.018	0.00181278	0.00203959	0.0043326	0.0141676	0.0155345	0.00946266		-0.018	-0.00136094	-0.00151046	-0.00120364	-0.00610193	-0.00469018	-0.00215216		-0.018	-0.00108913	-0.00126092	-0.000668633	-0.0044537	-0.00551313	-0.00184919
-0.0178	0.00154178	0.00279928	0.00621088	0.0205341	0.0164312	0.00886496		-0.0178	0.00182371	0.00204516	0.00433364	0.0142131	0.0155518	0.00946875		-0.0178	-0.00135444	-0.00150344	-0.00118856	-0.00605025	-0.00464294	-0.00213905		-0.0178	-0.0010782	-0.00125534	-0.000667592	-0.0044082	-0.00549576	-0.00184309
-0.0176	0.00154622	0.0028064	0.00622488	0.0205846	0.0164787	0.00888324		-0.0176	0.00183192	0.0020486	0.00433496	0.0142485	0.0155811	0.00947424		-0.0176	-0.00135	-0.00149631	-0.00117457	-0.00599976	-0.00459539	-0.00212076		-0.0176	-0.00106999	-0.0012519	-0.00066628	-0.00437279	-0.0054665	-0.00183761
-0.0174	0.00155164	0.00281735	0.00624663	0.0206473	0.0165272	0.00890184		-0.0174	0.00183666	0.00205269	0.00433585	0.0142875	0.0156241	0.0094779		-0.0174	-0.00134459	-0.00148536	-0.00115282	-0.00593704	-0.00454693	-0.00210217		-0.0174	-0.00106525	-0.00124781	-0.000665388	-0.00433378	-0.00542352	-0.00183395
-0.0172	0.00155619	0.00283058	0.00626887	0.0207183	0.0165814	0.0089189		-0.0172	0.00183972	0.00205538	0.00433733	0.0143345	0.0156735	0.00949192		-0.0172	-0.00134004	-0.00147214	-0.00113057	-0.00586597	-0.00449268	-0.0020851		-0.0172	-0.00106219	-0.00124512	-0.000663907	-0.00428673	-0.00537414	-0.00181993
-0.017	0.00156268	0.00284321	0.00628806	0.0207819	0.0166415	0.00893414		-0.017	0.00184285	0.00206218	0.00433947	0.0143732	0.015725	0.00951112		-0.017	-0.00133354	-0.0014595	-0.00111138	-0.00580244	-0.00443263	-0.00206986		-0.017	-0.00105906	-0.00123833	-0.000661761	-0.00424809	-0.00532263	-0.00180073
-0.0168	0.00157411	0.00285539	0.00630508	0.0208242	0.0166881	0.00895457		-0.0168	0.00184661	0.00206868	0.00434557	0.0144016	0.015778	0.00952514		-0.0168	-0.00132212	-0.00144733	-0.00109436	-0.0057601	-0.004386	-0.00204944		-0.0168	-0.0010553	-0.00123183	-0.00065566	-0.00421961	-0.0052696	-0.00178671
-0.0166	0.00158505	0.00286764	0.0063251	0.0208722	0.0167314	0.0089759		-0.0166	0.00185107	0.0020769	0.00435219	0.0144302	0.0158188	0.00953672		-0.0166	-0.00131118	-0.00143507	-0.00107434	-0.00571209	-0.00434272	-0.0020281		-0.0166	-0.00105084	-0.00122361	-0.000649049	-0.00419106	-0.00522875	-0.00177512
-0.0164	0.00159501	0.00287797	0.00634693	0.0209197	0.0167911	0.0089951		-0.0164	0.00185462	0.00208734	0.00435657	0.0144673	0.0158539	0.00954526		-0.0164	-0.00130122	-0.00142475	-0.00105251	-0.00566461	-0.00428298	-0.0020089		-0.0164	-0.00104729	-0.00121316	-0.000644669	-0.00415398	-0.0051937	-0.00176659
-0.0162	0.00160091	0.00288843	0.00636857	0.0209633	0.016853	0.00900973		-0.0162	0.00185817	0.00209465	0.00436001	0.0145211	0.0158975	0.00955196		-0.0162	-0.00129532	-0.00141429	-0.00103087	-0.00562099	-0.0042211	-0.00199427		-0.0162	-0.00104374	-0.00120586	-0.000641224	-0.00410017	-0.00515012	-0.00175989
-0.016	0.00160649	0.00289925	0.00638949	0.0209933	0.0169128	0.00901735		-0.016	0.00186193	0.00210805	0.00436633	0.0145815	0.0159365	0.00956263		-0.016	-0.00128974	-0.00140347	-0.00100995	-0.00559107	-0.00416136	-0.00198665		-0.016	-0.00103998	-0.00119246	-0.000634908	-0.00403972	-0.0051111	-0.00174922
-0.0158	0.0016151	0.00291569	0.00640364	0.0210349	0.0169801	0.00902558		-0.0158	0.00186945	0.00212339	0.00437288	0.0146371	0.0159709	0.00957604		-0.0158	-0.00128113	-0.00138703	-0.000995801	-0.00554945	-0.004094	-0.00197842		-0.0158	-0.00103246	-0.00117712	-0.000628355	-0.00398415	-0.00507666	-0.00173581
-0.0156	0.00162425	0.00293045	0.0064175	0.0210752	0.0170469	0.00903899		-0.0156	0.00187697	0.00213344	0.00437709	0.0146715	0.0160093	0.00958884		-0.0156	-0.00127198	-0.00137226	-0.000981943	-0.0055091	-0.00402725	-0.00196501		-0.0156	-0.00102494	-0.00116707	-0.000624149	-0.00394974	-0.00503826	-0.00172301
-0.0154	0.00163616	0.00294141	0.00643072	0.0211056	0.0171057	0.00905484		-0.0154	0.00187919	0.00213737	0.0043841	0.0147205	0.0160648	0.00960226		-0.0154	-0.00126007	-0.0013613	-0.000968723	-0.0054787	-0.00396843	-0.00194916		-0.0154	-0.00102272	-0.00116314	-0.000617139	-0.00390074	-0.00498278	-0.00170959
-0.0152	0.00164807	0.00295041	0.00644006	0.0211392	0.0171596	0.00907466		-0.0152	0.00188629	0.00215106	0.00439344	0.0147794	0.0161273	0.00962329		-0.0152	-0.00124815	-0.00135231	-0.000959383	-0.00544515	-0.00391448	-0.00192935		-0.0152	-0.00101562	-0.00114945	-0.000607795	-0.00384186	-0.0049203	-0.00168856
-0.015	0.00166502	0.00296315	0.00644751	0.0211874	0.0171999	0.00909081		-0.015	0.00189903	0.00217265	0.00440276	0.0148295	0.0161892	0.00964676		-0.015	-0.00123121	-0.00133956	-0.000951929	-0.00539694	-0.00387425	-0.0019132		-0.015	-0.00100288	-0.00112785	-0.000598472	-0.0037918	-0.00485843	-0.00166509
-0.0148	0.00168933	0.00298078	0.00645348	0.021239	0.0172413	0.00910513		-0.0148	0.00191031	0.00219349	0.00441393	0.0148673	0.0162334	0.00966535		-0.0148	-0.0012069	-0.00132194	-0.000945966	-0.00534533	-0.00383279	-0.00189887		-0.0148	-0.000991599	-0.00110701	-0.000587309	-0.00375392	-0.00481423	-0.0016465
-0.0146	0.00171732	0.00299735	0.00645768	0.0213024	0.01728	0.00911824		-0.0146	0.00191651	0.00221221	0.004418	0.0149114	0.016294	0.00968851		-0.0146	-0.0011789	-0.00130536	-0.000941758	-0.00528193	-0.00379409	-0.00188577		-0.0146	-0.000985404	-0.00108829	-0.00058324	-0.00370986	-0.00475358	-0.00162334
-0.0144	0.00174255	0.0030097	0.00646628	0.0213496	0.0173346	0.00913043		-0.0144	0.0019179	0.00223098	0.00442645	0.0149548	0.0163647	0.00971137		-0.0144	-0.00115367	-0.00129302	-0.000933166	-0.0052347	-0.00373953	-0.00187357		-0.0144	-0.000984011	-0.00106953	-0.000574786	-0.00366646	-0.00468287	-0.00160048
-0.0142	0.0017556	0.00302452	0.00647516	0.0213809	0.0173773	0.00913714		-0.0142	0.00192598	0.00224949	0.00443475	0.0150036	0.0164355	0.00973423		-0.0142	-0.00114062	-0.00127819	-0.000924279	-0.0052034	-0.00369686	-0.00186687		-0.0142	-0.000975936	-0.00105102	-0.000566481	-0.00361763	-0.00461215	-0.00157762
-0.014	0.00177786	0.00303699	0.00648597	0.0214249	0.0174233	0.00914689		-0.014	0.0019392	0.00226486	0.00444169	0.0150592	0.0164992	0.00976593		-0.014	-0.00111837	-0.00126573	-0.00091347	-0.00515941	-0.00365083	-0.00185711		-0.014	-0.000962709	-0.00103564	-0.000559541	-0.00356209	-0.00454845	-0.00154592
-0.0138	0.00179849	0.00304406	0.00650112	0.0214758	0.0174806	0.00916061		-0.0138	0.00195159	0.00227868	0.00444988	0.015112	0.016561	0.00980037		-0.0138	-0.00109774	-0.00125865	-0.000898321	-0.00510856	-0.00359353	-0.0018434		-0.0138	-0.000950317	-0.00102183	-0.000551358	-0.00350922	-0.00448658	-0.00151148
-0.0136	0.00181592	0.00305262	0.00651501	0.0215236	0.0175388	0.00917768		-0.0136	0.00195988	0.00229339	0.00445931	0.015152	0.0166354	0.00983116		-0.0136	-0.0010803	-0.0012501	-0.000884429	-0.00506069	-0.00353532	-0.00182633		-0.0136	-0.000942033	-0.00100712	-0.000541923	-0.00346923	-0.00441221	-0.00148069
-0.0134	0.0018313	0.00306677	0.00652393	0.0215779	0.0175924	0.00919444		-0.0134	0.0019619	0.00230591	0.00446804	0.0151762	0.0166951	0.00985859		-0.0134	-0.00106493	-0.00123594	-0.000875513	-0.00500637	-0.00348167	-0.00180957		-0.0134	-0.000940015	-0.000994593	-0.000533194	-0.00344509	-0.00435247	-0.00145326
-0.0132	0.00184337	0.00308053	0.00653387	0.0216411	0.0176281	0.00921303		-0.0132	0.00196329	0.00231723	0.00448057	0.0151967	0.0167637	0.00987992		-0.0132	-0.00105285	-0.00122219	-0.000865573	-0.00494321	-0.00344601	-0.00179097		-0.0132	-0.000938622	-0.000983281	-0.000520661	-0.00342454	-0.00428389	-0.00143193
-0.013	0.00185041	0.00310025	0.00654581	0.0217265	0.0176443	0.00922919		-0.013	0.00196914	0.00233035	0.00448845	0.0152272	0.0168445	0.00989516		-0.013	-0.00104581	-0.00120246	-0.000853633	-0.0048578	-0.00342986	-0.00177482		-0.013	-0.000932775	-0.000970157	-0.000512786	-0.00339403	-0.00420312	-0.00141669
-0.0128	0.00185815	0.00312078	0.00655319	0.0218003	0.0176671	0.00924229		-0.0128	0.00198069	0.00234602	0.00449406	0.0152533	0.0169109	0.00991254		-0.0128	-0.00103807	-0.00118193	-0.000846254	-0.00478407	-0.003407	-0.00176171		-0.0128	-0.000921218	-0.000954489	-0.00050718	-0.003368	-0.00413667	-0.00139931
-0.0126	0.00186893	0.00313666	0.0065625	0.0218612	0.017701	0.00925448		-0.0126	0.00199469	0.0023582	0.00450239	0.0152808	0.0169789	0.00992869		-0.0126	-0.0010273	-0.00116606	-0.000836941	-0.00472315	-0.00337316	-0.00174952		-0.0126	-0.000907226	-0.000942308	-0.000498845	-0.00334047	-0.00406871	-0.00138316
-0.0124	0.0018796	0.00315016	0.00657388	0.0219034	0.0177439	0.00926729		-0.0124	0.00200478	0.00236357	0.00451185	0.0153115	0.0170612	0.00994393		-0.0124	-0.00101663	-0.00115255	-0.000825563	-0.00468088	-0.00333019	-0.00173672		-0.0124	-0.000897131	-0.000936936	-0.000489388	-0.00330976	-0.00398641	-0.00136792
-0.0122	0.0018888	0.00316469	0.00658602	0.0219832	0.0177884	0.00928222		-0.0122	0.00201411	0.00236966	0.00451754	0.0153444	0.0171395	0.00996374		-0.0122	-0.00100743	-0.00113802	-0.000813424	-0.0046011	-0.00328569	-0.00172179		-0.0122	-0.000887803	-0.000930851	-0.000483691	-0.00327686	-0.00390808	-0.00134811
-0.012	0.00189768	0.00318352	0.00659489	0.0220776	0.017829	0.00929502		-0.012	0.00202476	0.00238031	0.00452455	0.0153738	0.0172038	0.00998569		-0.012	-0.000998545	-0.00111919	-0.00080455	-0.00450676	-0.00324515	-0.00170898		-0.012	-0.000877152	-0.000920194	-0.000476685	-0.00324744	-0.00384377	-0.00132616
-0.0118	0.00190743	0.00320143	0.00660062	0.0221768	0.0178665	0.00931209		-0.0118	0.00204251	0.00239047	0.00453484	0.0154068	0.0172651	0.0100085		-0.0118	-0.000988799	-0.00110129	-0.000798821	-0.00440748	-0.00320766	-0.00169192		-0.0118	-0.0008594	-0.000910033	-0.000466397	-0.00321442	-0.0037825	-0.0013033
-0.0116	0.0019182	0.00322065	0.00660886	0.0222639	0.0179228	0.00932855		-0.0116	0.00206235	0.00239786	0.00453875	0.0154412	0.017327	0.0100308		-0.0116	-0.000978024	-0.00108207	-0.000790586	-0.00432045	-0.00315127	-0.00167546		-0.0116	-0.00083956	-0.000902649	-0.000462482	-0.00318009	-0.00372063	-0.00128105
-0.0114	0.001928	0.00323625	0.00661986	0.0223248	0.0179725	0.0093572		-0.0114	0.0020737	0.00240638	0.00454295	0.0154666	0.0173956	0.0100488		-0.0114	-0.000968224	-0.00106647	-0.000779583	-0.00425953	-0.00310159	-0.00164681		-0.0114	-0.000828213	-0.00089413	-0.000458282	-0.00315463	-0.00365205	-0.00126307
-0.0112	0.00193509	0.00324961	0.00663213	0.0223723	0.0180036	0.00938981		-0.0112	0.00208073	0.00241667	0.00454976	0.0154978	0.0174532	0.0100634		-0.0112	-0.000961131	-0.00105311	-0.000767314	-0.00421201	-0.0030705	-0.00161419		-0.0112	-0.000821181	-0.000883833	-0.000451471	-0.00312345	-0.00359445	-0.00124844
-0.011	0.00194977	0.00327031	0.00664127	0.0224316	0.018031	0.0094145		-0.011	0.00208706	0.00242405	0.00455802	0.0155287	0.0174974	0.0100768		-0.011	-0.000946458	-0.0010324	-0.000758173	-0.00415268	-0.00304307	-0.0015895		-0.011	-0.000814846	-0.000876456	-0.000443219	-0.00309256	-0.00355025	-0.00123503
-0.0108	0.00196525	0.0032939	0.00665116	0.0224893	0.0180749	0.00942822		-0.0108	0.00209437	0.00243478	0.00456676	0.0155556	0.0175321	0.0100988		-0.0108	-0.000930972	-0.00100882	-0.000748283	-0.00409501	-0.00299918	-0.00157579		-0.0108	-0.000807537	-0.000865728	-0.000434479	-0.00306564	-0.0035155	-0.00121308
-0.0106	0.00197944	0.00331365	0.00665919	0.0225479	0.0181274	0.0094459		-0.0106	0.00210642	0.00244874	0.00457718	0.0155772	0.0175754	0.0101256		-0.0106	-0.000916786	-0.000989062	-0.000740257	-0.00403642	-0.00294676	-0.00155811		-0.0106	-0.000795493	-0.000851767	-0.000424051	-0.00304402	-0.00347222	-0.00118626
-0.0104	0.0019946	0.00332641	0.00666709	0.0226101	0.0181813	0.00946815		-0.0104	0.00212118	0.00246147	0.00458605	0.0156024	0.0176208	0.0101524		-0.0104	-0.000901626	-0.000976304	-0.000732357	-0.00397426	-0.00289281	-0.00153586		-0.0104	-0.000780735	-0.000839041	-0.00041518	-0.00301888	-0.00342681	-0.00115944
-0.0102	0.00201371	0.00333648	0.00667806	0.0226617	0.0182423	0.00949131		-0.0102	0.00214123	0.00246931	0.00459884	0.0156301	0.0176647	0.0101737		-0.0102	-0.000882512	-0.000966236	-0.000721384	-0.00392264	-0.00283185	-0.0015127		-0.0102	-0.000760686	-0.000831193	-0.000402395	-0.00299116	-0.00338292	-0.0011381
-0.01	0.00202725	0.00334676	0.00669407	0.0227092	0.0183002	0.00951325		-0.01	0.00215995	0.00248004	0.00461196	0.0156615	0.0177275	0.0101853		-0.01	-0.000868976	-0.000955958	-0.000705377	-0.00387515	-0.00277394	-0.00149075		-0.01	-0.000741959	-0.000820468	-0.000389273	-0.00295977	-0.00332013	-0.00112652
-0.0098	0.00203802	0.00335825	0.00671054	0.0227435	0.0183441	0.00953429		-0.0098	0.00217499	0.00249866	0.0046256	0.0156955	0.0178055	0.0102018		-0.0098	-0.000858201	-0.000944463	-0.000688904	-0.00384078	-0.00273005	-0.00146972		-0.0098	-0.000726922	-0.000801843	-0.000375638	-0.00292576	-0.0032421	-0.00111006
-0.0096	0.00204858	0.00337313	0.00672454	0.0227689	0.0183742	0.00955227		-0.0096	0.00218787	0.00251518	0.00462931	0.0157293	0.0178823	0.0102231		-0.0096	-0.000847643	-0.000929585	-0.000674907	-0.00381541	-0.00269987	-0.00145174		-0.0096	-0.000714043	-0.000785329	-0.000371928	-0.00289192	-0.00316529	-0.00108873
-0.0094	0.00206147	0.00338793	0.0067408	0.0227968	0.0184069	0.00957391		-0.0094	0.00220444	0.00252751	0.00463563	0.0157634	0.0179512	0.0102478		-0.0094	-0.000834756	-0.00091479	-0.00065864	-0.00378757	-0.00266726	-0.0014301		-0.0094	-0.000697475	-0.000772997	-0.000365607	-0.00285785	-0.00309641	-0.00106404
-0.0092	0.00207446	0.00340319	0.00675505	0.0228183	0.0184614	0.0095925		-0.0092	0.00221968	0.00254233	0.00464918	0.01579	0.0180079	0.010271		-0.0092	-0.000821762	-0.00089953	-0.000644397	-0.00376606	-0.0026127	-0.0014115		-0.0092	-0.000682229	-0.000758177	-0.000352053	-0.00283129	-0.00303972	-0.00104087
-0.009	0.00208546	0.00341689	0.00676866	0.0228406	0.0185166	0.00960987		-0.009	0.00223569	0.00255862	0.00466441	0.0158206	0.018053	0.0102911		-0.009	-0.00081077	-0.000885822	-0.000630786	-0.0037437	-0.00255753	-0.00139413		-0.009	-0.000666218	-0.000741888	-0.000336821	-0.00280066	-0.00299461	-0.00102076
-0.0088	0.00209645	0.00343142	0.0067812	0.0228683	0.0185705	0.00963182		-0.0088	0.00224899	0.00256937	0.00467469	0.0158714	0.0180832	0.0103005		-0.0088	-0.000799778	-0.00087129	-0.000618242	-0.00371601	-0.00250358	-0.00137219		-0.0088	-0.000652921	-0.000731139	-0.000326545	-0.00274988	-0.00296443	-0.00101131
-0.0086	0.00210316	0.00344734	0.0067899	0.0229162	0.0186196	0.00966596		-0.0086	0.00225707	0.0025813	0.00468711	0.0159314	0.0181197	0.0103076		-0.0086	-0.000793064	-0.000855371	-0.000609547	-0.00366813	-0.00245451	-0.00133805		-0.0086	-0.000644846	-0.000719203	-0.000314128	-0.00268987	-0.00292786	-0.0010043
-0.0084	0.00210906	0.00346275	0.00679848	0.0229692	0.0186748	0.00970009		-0.0084	0.00226437	0.00259697	0.00469699	0.015968	0.0181682	0.0103112		-0.0084	-0.000787163	-0.000839964	-0.000600958	-0.00361512	-0.00239935	-0.00130391		-0.0084	-0.000637536	-0.000703532	-0.000304241	-0.00265322	-0.0028794	-0.00100064
-0.0082	0.00212114	0.0034782	0.00680731	0.0230058	0.0187623	0.00972448		-0.0082	0.00226897	0.00262072	0.00470859	0.0159958	0.0182222	0.0103127		-0.0082	-0.000775088	-0.00082452	-0.000592136	-0.00357848	-0.00231187	-0.00127953		-0.0082	-0.000632942	-0.00067979	-0.000292646	-0.0026255	-0.00282545	-0.000999117
-0.008	0.00213408	0.00348606	0.00681871	0.0230446	0.0188555	0.00975313		-0.008	0.00227475	0.00264417	0.0047179	0.0160343	0.0182773	0.0103149		-0.008	-0.000762148	-0.000816659	-0.000580731	-0.00353972	-0.0022186	-0.00125088		-0.008	-0.000627164	-0.000656332	-0.000283338	-0.00258697	-0.00277028	-0.000996984
-0.0078	0.00214572	0.00350041	0.00683034	0.0230925	0.0189555	0.0097833		-0.0078	0.00228129	0.0026628	0.00472602	0.0160868	0.0183276	0.0103231		-0.0078	-0.000750506	-0.00080231	-0.000569105	-0.00349178	-0.00211863	-0.0012207		-0.0078	-0.00062062	-0.000637706	-0.00027522	-0.00253448	-0.00271999	-0.000988754
-0.0076	0.00215628	0.00351832	0.00684045	0.0231579	0.0190296	0.00980586		-0.0076	0.00228951	0.00267492	0.00473445	0.0161429	0.0183709	0.0103371		-0.0076	-0.000739948	-0.000784392	-0.000558992	-0.00342644	-0.00204456	-0.00119815		-0.0076	-0.000612405	-0.00062559	-0.000266786	-0.0024784	-0.00267671	-0.000974734
-0.0074	0.00216749	0.00353193	0.00684856	0.0232302	0.0190939	0.00983116		-0.0074	0.00230628	0.00269346	0.00474228	0.0162013	0.018427	0.0103524		-0.0074	-0.00072874	-0.000770785	-0.000550884	-0.00335409	-0.00198025	-0.00117285		-0.0074	-0.000595628	-0.00060705	-0.000258959	-0.00241997	-0.00262063	-0.000959494
-0.0072	0.00218292	0.00354262	0.00685344	0.0233	0.0191417	0.00985066		-0.0072	0.00232362	0.00271486	0.00474907	0.0162564	0.018487	0.0103706		-0.0072	-0.000713309	-0.000760091	-0.000546006	-0.0032843	-0.0019324	-0.00115334		-0.0072	-0.000578294	-0.000585647	-0.000252166	-0.00236486	-0.00256058	-0.000941206
-0.007	0.00219559	0.00355409	0.00686072	0.0233528	0.0191862	0.0098659		-0.007	0.00233719	0.00274014	0.0047559	0.0163025	0.0185751	0.010385		-0.007	-0.000700639	-0.000748622	-0.000538719	-0.00323154	-0.0018879	-0.0011381		-0.007	-0.000564719	-0.000560366	-0.000245337	-0.00231877	-0.0024725	-0.000926881
-0.0068	0.0022062	0.00357686	0.00686733	0.0233925	0.0192292	0.00988663		-0.0068	0.00235007	0.0027622	0.00476762	0.0163357	0.0186714	0.0103978		-0.0068	-0.000690026	-0.000725859	-0.000532111	-0.00319186	-0.00184492	-0.00111738		-0.0068	-0.00055184	-0.000538309	-0.000233615	-0.00228553	-0.00237618	-0.00091408
-0.0066	0.00221719	0.00359661	0.00687217	0.0234707	0.0192932	0.00991711		-0.0066	0.00236685	0.00277485	0.00478157	0.0163625	0.0187577	0.0104136		-0.0066	-0.000679035	-0.000706104	-0.000527269	-0.00311366	-0.00178092	-0.0010869		-0.0066	-0.000535063	-0.000525654	-0.000219662	-0.00225876	-0.00228992	-0.00089823
-0.0064	0.0022291	0.00361643	0.0068798	0.0235722	0.0193667	0.00994637		-0.0064	0.00238084	0.00278079	0.00479307	0.0164005	0.0188406	0.0104301		-0.0064	-0.000667123	-0.000686287	-0.000519646	-0.00301212	-0.00170746	-0.00105764		-0.0064	-0.00052107	-0.000519717	-0.000208163	-0.00222075	-0.00220702	-0.000881771
-0.0062	0.00224015	0.00364104	0.00689328	0.0236805	0.0194334	0.00997471		-0.0062	0.00238968	0.00279176	0.00480347	0.0164439	0.0189323	0.0104481		-0.0062	-0.000656077	-0.000661674	-0.000506159	-0.0029038	-0.00164071	-0.00102929		-0.0062	-0.000512229	-0.000508746	-0.00019776	-0.00217739	-0.00211528	-0.000863788
-0.006	0.00225488	0.0036666	0.00691097	0.023761	0.0194956	0.0100006		-0.006	0.00240291	0.00280451	0.00481119	0.0164982	0.0190049	0.0104712		-0.006	-0.00064135	-0.000636112	-0.000488477	-0.0028233	-0.00157853	-0.00100338		-0.006	-0.000499002	-0.000495997	-0.000190049	-0.00212308	-0.00204273	-0.000840624
-0.0058	0.00226874	0.00368734	0.00692785	0.0238354	0.0195428	0.0100274		-0.0058	0.00241043	0.00281636	0.004821	0.0165547	0.0191042	0.0105017		-0.0058	-0.000627489	-0.000615379	-0.00047159	-0.00274894	-0.00153129	-0.000976562		-0.0058	-0.000491483	-0.000484146	-0.000180238	-0.00206653	-0.00194337	-0.000810145
-0.0056	0.00227783	0.00370053	0.00693717	0.0239236	0.019595	0.010053		-0.0056	0.00241732	0.00282659	0.00483042	0.0166143	0.0192137	0.0105422		-0.0056	-0.000618392	-0.000602185	-0.000462273	-0.00266075	-0.00147917	-0.00095096		-0.0056	-0.000484592	-0.000473919	-0.000170819	-0.00200698	-0.00183395	-0.000769607
-0.0054	0.00229034	0.00371582	0.00694543	0.0240197	0.0196376	0.0100817		-0.0054	0.00242637	0.00283281	0.00483461	0.0166688	0.0193246	0.010581		-0.0054	-0.000605885	-0.0005869	-0.000454009	-0.00256459	-0.0014365	-0.000922309		-0.0054	-0.000475542	-0.000467697	-0.000166624	-0.00195242	-0.001723	-0.000730898
-0.0052	0.00230101	0.00373176	0.0069556	0.0240865	0.0196684	0.0101116		-0.0052	0.0024311	0.00283843	0.0048387	0.0167177	0.0194258	0.0106078		-0.0052	-0.000595218	-0.000570956	-0.000443846	-0.00249786	-0.00140571	-0.000892439		-0.0052	-0.000470808	-0.000462076	-0.000162537	-0.0019036	-0.00162181	-0.000704076
-0.005	0.00231146	0.00375481	0.00696249	0.0241439	0.0197025	0.0101356		-0.005	0.00243451	0.00284462	0.00484553	0.0167654	0.0195288	0.0106306		-0.005	-0.000584768	-0.00054791	-0.000436954	-0.00244042	-0.00137158	-0.00086836		-0.005	-0.000467397	-0.000455884	-0.000155708	-0.00185582	-0.00151879	-0.000681216
-0.0048	0.00232413	0.00377745	0.00697477	0.0242163	0.0197379	0.0101616		-0.0048	0.00244162	0.00284862	0.00485289	0.0168193	0.0196391	0.0106593		-0.0048	-0.000572098	-0.000525265	-0.000424675	-0.002368	-0.00133622	-0.000842453		-0.0048	-0.000460296	-0.000451886	-0.000148341	-0.00180193	-0.00140846	-0.000652566
-0.0046	0.00233387	0.00379824	0.00698912	0.0243222	0.0197717	0.0101948		-0.0046	0.00244816	0.00285861	0.00485716	0.016879	0.0197467	0.0106861		-0.0046	-0.000562352	-0.000504474	-0.000410325	-0.00226214	-0.00130239	-0.00080923		-0.0046	-0.000453752	-0.000441895	-0.000144077	-0.00174227	-0.00130086	-0.000625744
-0.0044	0.00234774	0.00382051	0.00699876	0.0244271	0.0198056	0.0102289		-0.0044	0.00245067	0.00287052	0.00486005	0.016942	0.0198217	0.0107181		-0.0044	-0.000548491	-0.000482204	-0.000400687	-0.00215726	-0.00126856	-0.000775093		-0.0044	-0.000451246	-0.00042999	-0.000141184	-0.00167926	-0.00122588	-0.00059374
-0.0042	0.00236484	0.00383758	0.00700714	0.0245574	0.0198336	0.01026		-0.0042	0.00245575	0.00288025	0.00486303	0.0170123	0.0198863	0.0107516		-0.0042	-0.000531381	-0.000465131	-0.000392301	-0.00202693	-0.00124052	-0.000744004		-0.0042	-0.000446164	-0.000420255	-0.000138209	-0.00160897	-0.00116127	-0.000560213
-0.004	0.00238011	0.00385253	0.00701619	0.0246921	0.0198717	0.0102926		-0.004	0.00246981	0.00288691	0.00486785	0.0170745	0.0199497	0.0107849		-0.004	-0.000516112	-0.000450188	-0.000383256	-0.00189217	-0.00120242	-0.000711391		-0.004	-0.000432102	-0.000413602	-0.000133382	-0.00154671	-0.00109787	-0.00052699
-0.0038	0.00239468	0.00386511	0.00702611	0.0248132	0.0199116	0.0103161		-0.0038	0.002487	0.00289171	0.00486924	0.0171226	0.0199857	0.0108117		-0.0038	-0.000501547	-0.000437607	-0.00037333	-0.0017711	-0.00116249	-0.000687922		-0.0038	-0.000414907	-0.000408795	-0.000131994	-0.0014987	-0.00106191	-0.000500168
-0.0036	0.0024133	0.00388386	0.00704073	0.0249057	0.0199497	0.0103402		-0.0036	0.00249619	0.00289835	0.00487074	0.017173	0.0200119	0.0108306		-0.0036	-0.000482921	-0.000418854	-0.000358713	-0.00167858	-0.00112439	-0.000663843		-0.0036	-0.000405718	-0.00040216	-0.000130493	-0.00144822	-0.00103569	-0.000481271
-0.0034	0.00243171	0.00390324	0.00705427	0.0249919	0.0199775	0.010367		-0.0034	0.00250357	0.00290803	0.0048719	0.0172389	0.0200546	0.0108419		-0.0034	-0.000464512	-0.000399473	-0.000345172	-0.00159246	-0.00109665	-0.000637021		-0.0034	-0.000398338	-0.000392479	-0.000129331	-0.00138236	-0.000993021	-0.000469994
-0.0032	0.00244866	0.00391676	0.00707012	0.0250567	0.0200174	0.0103972		-0.0032	0.00251763	0.00291996	0.00487558	0.0173073	0.0201091	0.0108507		-0.0032	-0.000447564	-0.000385956	-0.000329319	-0.00152764	-0.00105672	-0.000606846		-0.0032	-0.000384276	-0.000380547	-0.000125658	-0.00131398	-0.000938463	-0.000461155
-0.003	0.00246258	0.00392344	0.00708328	0.0251562	0.0200741	0.0104304		-0.003	0.00253775	0.00292989	0.00487956	0.0173664	0.0201631	0.0108598		-0.003	-0.000433649	-0.00037928	-0.000316162	-0.00142813	-0.00100003	-0.000573624		-0.003	-0.000364157	-0.00037062	-0.000121678	-0.00125483	-0.000884514	-0.000452011
-0.0028	0.00248862	0.00394195	0.00709714	0.025289	0.0201277	0.0104651		-0.0028	0.0025553	0.00294719	0.0048847	0.0174336	0.0202094	0.0108732		-0.0028	-0.000407605	-0.000360766	-0.000302306	-0.00129531	-0.000946388	-0.000538877		-0.0028	-0.000346614	-0.000353314	-0.000116537	-0.00118763	-0.000838186	-0.0004386
-0.0026	0.00251526	0.00396425	0.00711201	0.0254138	0.0201674	0.0104947		-0.0026	0.00256616	0.00296708	0.00488939	0.0175011	0.0202573	0.0108848		-0.0026	-0.000380966	-0.000338469	-0.000287427	-0.00117052	-0.000906764	-0.000509312		-0.0026	-0.000335754	-0.000333427	-0.000111849	-0.00112017	-0.000790333	-0.000427017
-0.0024	0.00253464	0.0039793	0.00713487	0.025542	0.020217	0.0105279		-0.0024	0.00258001	0.00298468	0.00489508	0.017553	0.0203179	0.0109031		-0.0024	-0.000361582	-0.000323413	-0.000264577	-0.00104229	-0.000857082	-0.000476089		-0.0024	-0.000321901	-0.000315827	-0.000106155	-0.00106829	-0.000729679	-0.00040873
-0.0022	0.00255008	0.0039948	0.00715821	0.0256628	0.0202832	0.0105636		-0.0022	0.00259609	0.00300249	0.00490024	0.0175821	0.0203822	0.0109287		-0.0022	-0.00034615	-0.000307917	-0.000241232	-0.00092154	-0.000790942	-0.000440428		-0.0022	-0.00030582	-0.000298017	-0.000100994	-0.00103914	-0.000665367	-0.000383127
-0.002	0.00257233	0.00400904	0.00717756	0.0257676	0.0203703	0.010602		-0.002	0.00261078	0.0030233	0.00490484	0.0176385	0.0204612	0.0109683		-0.002	-0.000323896	-0.000293675	-0.000221883	-0.000816753	-0.000703771	-0.000402024		-0.002	-0.000291131	-0.000277203	-9.63919e-05	-0.000982714	-0.000586425	-0.000343504
-0.0018	0.00259967	0.00402695	0.00719317	0.0258525	0.0204587	0.0106389		-0.0018	0.00262463	0.00305117	0.00491089	0.0177126	0.0205234	0.0110022		-0.0018	-0.000296553	-0.000275764	-0.000206272	-0.000731836	-0.000615381	-0.000365144		-0.0018	-0.000277277	-0.000249333	-9.0349e-05	-0.000908606	-0.000524247	-0.000309672
-0.0016	0.00261732	0.00404345	0.0072112	0.0259188	0.020534	0.0106803		-0.0016	0.00263598	0.00308886	0.00491828	0.0177783	0.0205825	0.0110281		-0.0016	-0.000278902	-0.000259265	-0.000188243	-0.00066548	-0.000540096	-0.000323692		-0.0016	-0.00026593	-0.00021165	-8.29592e-05	-0.000842978	-0.000465117	-0.000283764
-0.0014	0.00263194	0.00406808	0.00723361	0.0259651	0.0206063	0.0107093		-0.0014	0.00265345	0.00312537	0.00492638	0.0178359	0.0206395	0.0110531		-0.0014	-0.000264283	-0.000234632	-0.000165837	-0.000619254	-0.00046786	-0.000294736		-0.0014	-0.000248457	-0.000175133	-7.48592e-05	-0.000785333	-0.00040812	-0.000258771
-0.0012	0.00264894	0.00409	0.00725384	0.0260183	0.020663	0.0107355		-0.0012	0.00268986	0.00315632	0.0049357	0.0179188	0.0207071	0.0110738		-0.0012	-0.000247281	-0.000212716	-0.000145607	-0.000565993	-0.000411168	-0.000268524		-0.0012	-0.000212048	-0.000144185	-6.55385e-05	-0.000702486	-0.000340456	-0.000238045
-0.001	0.00267726	0.00411534	0.00727466	0.0260899	0.0207196	0.0107724		-0.001	0.00274381	0.00318145	0.00494628	0.0180448	0.0207809	0.0110994		-0.001	-0.000218963	-0.000187379	-0.000124779	-0.000494458	-0.000354476	-0.000231644		-0.001	-0.000158096	-0.000119061	-5.49515e-05	-0.000576489	-0.000266695	-0.000212442
-0.0008	0.00270878	0.00413937	0.00729428	0.0261859	0.0207757	0.0108251		-0.0008	0.00278823	0.00320907	0.00495885	0.0181734	0.0208446	0.0111265		-0.0008	-0.000187451	-0.000163345	-0.000105165	-0.000398391	-0.000298394	-0.000178914		-0.0008	-0.000113682	-9.144e-05	-4.23856e-05	-0.000447833	-0.000202993	-0.000185315
-0.0006	0.00275469	0.00417461	0.00732007	0.0262838	0.0208227	0.0108687		-0.0006	0.00281106	0.00323226	0.00497163	0.0182816	0.0208967	0.0111698		-0.0006	-0.000141536	-0.000128107	-7.93754e-05	-0.000300491	-0.000251456	-0.000135329		-0.0006	-9.08479e-05	-6.82501e-05	-2.96075e-05	-0.00033968	-0.000150873	-0.000142034
-0.0004	0.00279568	0.00421642	0.00734616	0.0263704	0.0208821	0.0109107		-0.0004	0.00282687	0.00325234	0.00498158	0.0183661	0.0209354	0.0112131		-0.0004	-0.000100548	-8.62984e-05	-5.32844e-05	-0.00021391	-0.00019202	-9.3267e-05		-0.0004	-7.50452e-05	-4.81648e-05	-1.966e-05	-0.000255116	-0.000112164	-9.8754e-05
-0.0002	0.00284024	0.00425836	0.00737254	0.0264575	0.0209617	0.0109537		-0.0002	0.00285757	0.00327191	0.00499073	0.0184753	0.0209796	0.0112591		-0.0002	-5.59861e-05	-4.43517e-05	-2.69008e-05	-0.00012677	-0.000112469	-5.0291e-05		-0.0002	-4.43449e-05	-2.8599e-05	-1.05087e-05	-0.000145927	-6.797e-05	-5.273e-05
0	0.00289623	0.00430272	0.00739944	0.0265843	0.0210741	0.011004		0	0.00290191	0.00330051	0.00500124	0.0186213	0.0210476	0.0113118		0	0	0	0	0	0	0		0	0	0	0	0	0	0
0.0002	0.00295535	0.00433725	0.00742507	0.0267273	0.0211778	0.0110686		0.0002	0.00296011	0.00333407	0.00501285	0.0187741	0.0211454	0.0113582		0.0002	5.91265e-05	3.45316e-05	2.56241e-05	0.000143001	0.00010363	6.4617e-05		0.0002	5.81983e-05	3.35678e-05	1.16181e-05	0.000152869	9.7839e-05	4.6329e-05
0.0004	0.00301172	0.00436547	0.00744447	0.0268681	0.0212369	0.0111262		0.0004	0.00300188	0.00336633	0.00502245	0.0189032	0.0212475	0.011399		0.0004	0.000115492	6.2753e-05	4.50263e-05	0.000283796	0.000162761	0.000122223		0.0004	9.99675e-05	6.58212e-05	2.12194e-05	0.000281937	0.000199945	8.7171e-05
0.0006	0.00307084	0.00440217	0.00745596	0.0269691	0.0212789	0.0111747		0.0006	0.00301629	0.00338984	0.00503753	0.0189905	0.0213478	0.0114356		0.0006	0.000174618	9.9453e-05	5.65176e-05	0.000384751	0.000204822	0.000170685		0.0006	0.000114378	8.93329e-05	3.62899e-05	0.000369207	0.000300223	0.000123747
0.0008	0.00313279	0.00444323	0.00746227	0.0270447	0.0213451	0.0112085		0.0008	0.0030401	0.00340682	0.00505155	0.0190431	0.0214341	0.0114706		0.0008	0.00023656	0.000140513	6.28303e-05	0.000460365	0.000270963	0.000204517		0.0008	0.000138186	0.000106309	5.03114e-05	0.000421833	0.00038648	0.000158798
0.001	0.00318271	0.00447881	0.00747278	0.027106	0.0214359	0.0112369		0.001	0.00306203	0.00342604	0.00505925	0.0191052	0.0215176	0.0115072		0.001	0.000286482	0.00017609	7.33344e-05	0.000521676	0.000361791	0.000232864		0.001	0.000160115	0.000125533	5.80197e-05	0.000483991	0.000469994	0.000195374
0.0012	0.00320805	0.00451693	0.00748309	0.0271765	0.0215447	0.0112591		0.0012	0.00308382	0.0034448	0.00507507	0.0191763	0.0215962	0.0115386		0.0012	0.000311822	0.000214212	8.36488e-05	0.000592158	0.000470603	0.000255113		0.0012	0.000181905	0.00014429	7.38307e-05	0.000555032	0.000548631	0.000226767
0.0014	0.00324281	0.00454983	0.00749427	0.0272601	0.0216352	0.0112808		0.0014	0.00310435	0.00346502	0.00508757	0.0192437	0.0216837	0.0115691		0.0014	0.000346583	0.000247111	9.48307e-05	0.000675827	0.000561128	0.000276754		0.0014	0.000202441	0.000164509	8.63358e-05	0.000622467	0.000636107	0.000257247
0.0016	0.00328564	0.00457736	0.0075076	0.0273526	0.0217093	0.0113003		0.0016	0.0031164	0.00348245	0.00509322	0.0193037	0.0217529	0.0115974		0.0016	0.000389412	0.000274644	0.000108157	0.000768275	0.000635193	0.000296261		0.0016	0.000214484	0.000181943	9.19819e-05	0.000682463	0.000705295	0.000285593
0.0018	0.00332316	0.00459899	0.00752221	0.0274574	0.0217563	0.0113234		0.0018	0.00312447	0.00349727	0.00510382	0.0193549	0.0217947	0.0116215		0.0018	0.000426935	0.000296274	0.000122769	0.000873044	0.000682131	0.000319425		0.0018	0.00022256	0.000196759	0.000102586	0.000733599	0.000747052	0.000309671
0.002	0.00335835	0.00461457	0.00753077	0.0275487	0.0218224	0.0113527		0.002	0.00314473	0.00351226	0.00511277	0.0193994	0.0218535	0.0116429		0.002	0.000462129	0.000311857	0.00013133	0.000964363	0.000748271	0.000348685		0.002	0.000242818	0.000211752	0.000111533	0.000778143	0.000805877	0.000331007
0.0022	0.00338651	0.00462705	0.0075398	0.0276353	0.021898	0.0113774		0.0022	0.00316916	0.00352782	0.00512183	0.0194533	0.0219178	0.0116657		0.0022	0.000490285	0.000324337	0.000140359	0.00105099	0.000823861	0.000373374		0.0022	0.000267253	0.000227309	0.000120596	0.000832074	0.000870189	0.000353867
0.0024	0.00341223	0.0046485	0.00754978	0.0277266	0.0219672	0.0114008		0.0024	0.00318768	0.00353894	0.005129	0.0195078	0.0219766	0.0116962		0.0024	0.000516003	0.00034578	0.000150334	0.00114225	0.000893049	0.000396843		0.0024	0.000285771	0.000238435	0.000127769	0.000886536	0.000929014	0.000384346
0.0026	0.00343151	0.00467538	0.00755904	0.0278185	0.0220223	0.011424		0.0026	0.00320014	0.00354949	0.00513533	0.0195458	0.0220223	0.01173		0.0026	0.000535279	0.000372664	0.000159599	0.00123417	0.000948217	0.000420007		0.0026	0.000298232	0.00024898	0.000134097	0.000924572	0.000974734	0.000418178
0.0028	0.00346551	0.00470473	0.00756605	0.0279012	0.0220763	0.0114533		0.0028	0.00322325	0.00355878	0.00514019	0.019573	0.0220757	0.0117562		0.0028	0.000569282	0.000402017	0.000166611	0.00131686	0.00100217	0.000449268		0.0028	0.000321344	0.000258271	0.000138952	0.000951782	0.00102807	0.000444391
0.003	0.00350011	0.00473287	0.00757818	0.0279781	0.022136	0.0114822		0.003	0.00324901	0.00356703	0.00514429	0.0196085	0.0221269	0.0117779		0.003	0.000603881	0.000430153	0.000178736	0.00139375	0.0010619	0.000478223		0.003	0.000347102	0.000266525	0.000143056	0.000987262	0.00107928	0.000466031
0.0032	0.00352453	0.00477032	0.007594	0.0280638	0.022207	0.0115084		0.0032	0.00327206	0.00357405	0.00514548	0.019665	0.0221772	0.0118023		0.0032	0.000628301	0.000467607	0.000194558	0.00147951	0.00113292	0.000504436		0.0032	0.000370144	0.000273541	0.000144249	0.00104377	0.00112957	0.000490415
0.0034	0.00353638	0.00481158	0.00760775	0.0281778	0.0222826	0.0115334		0.0034	0.00329371	0.00358149	0.00514716	0.0197306	0.0222281	0.0118279		0.0034	0.000640158	0.000508866	0.000208304	0.00159349	0.00120851	0.000529429		0.0034	0.000391794	0.000280983	0.000145925	0.00110931	0.00118047	0.000516018
0.0036	0.00355398	0.0048521	0.00761999	0.0283196	0.0223448	0.0115593		0.0036	0.00330895	0.00358791	0.00514828	0.0197932	0.0222814	0.0118474		0.0036	0.000657756	0.000549384	0.00022055	0.00173531	0.00127069	0.000555336		0.0036	0.00040704	0.000287401	0.000147044	0.00117193	0.00123381	0.000535525
0.0038	0.0035817	0.00487979	0.00763852	0.0284507	0.0224551	0.0115819		0.0038	0.00333687	0.00360519	0.00515119	0.0198452	0.022328	0.0118608		0.0038	0.000685478	0.000577073	0.000239074	0.00186637	0.00138103	0.000577891		0.0038	0.000434956	0.000304682	0.000149956	0.00122392	0.00128044	0.000548935
0.004	0.00360542	0.00490159	0.00765258	0.0285491	0.0225859	0.0116072		0.004	0.0033613	0.00362824	0.00515536	0.0199069	0.0223707	0.0118699		0.004	0.000709194	0.000598876	0.000253142	0.00196482	0.00151178	0.000603189		0.004	0.000459391	0.000327732	0.000154123	0.00128568	0.00132311	0.000558079
0.0042	0.0036208	0.00492954	0.00766364	0.0286037	0.0226947	0.0116422		0.0042	0.00336931	0.0036503	0.00515848	0.0199703	0.0224085	0.0118812		0.0042	0.000724571	0.000626826	0.000264195	0.00201934	0.00162059	0.000638241		0.0042	0.000467397	0.00034979	0.000157242	0.00134903	0.00136091	0.000569357
0.0044	0.00363271	0.00495839	0.00767381	0.0286748	0.0227575	0.0116825		0.0044	0.00337724	0.00366155	0.00516273	0.0200281	0.0224362	0.0118955		0.0044	0.000736483	0.000655678	0.000274364	0.00209048	0.00168338	0.000678473		0.0044	0.000475333	0.000361047	0.000161491	0.00140683	0.00138864	0.000583682
0.0046	0.00365058	0.00498624	0.00768705	0.0287476	0.0228316	0.0117148		0.0046	0.0033959	0.00367714	0.00516647	0.0200728	0.0224612	0.0119089		0.0046	0.000754351	0.000683529	0.000287613	0.00216329	0.00175745	0.000710782		0.0046	0.00049399	0.00037663	0.000165236	0.00145157	0.00141364	0.000597093
0.0048	0.00367299	0.00500486	0.00769847	0.0288273	0.0229233	0.011741		0.0048	0.00342208	0.003691	0.00516817	0.0201085	0.0224914	0.0119242		0.0048	0.000776767	0.000702141	0.000299024	0.00224297	0.00184919	0.000736994		0.0048	0.000520165	0.000390491	0.000166932	0.0014872	0.00144381	0.000612333
0.005	0.00370716	0.00502735	0.00770981	0.0289045	0.0230151	0.0117721		0.005	0.00346691	0.00370449	0.00517225	0.0201407	0.0225201	0.0119473		0.005	0.000810932	0.000724635	0.000310363	0.00232016	0.00194093	0.000768083		0.005	0.000564997	0.000403984	0.000171019	0.00151947	0.00147246	0.000635497
0.0052	0.00372795	0.00505181	0.00771944	0.0289837	0.0230696	0.011801		0.0052	0.00350339	0.00371938	0.0051748	0.0201737	0.0225566	0.0119784		0.0052	0.000831724	0.000749097	0.000319997	0.0023994	0.00199549	0.000797039		0.0052	0.000601476	0.000418872	0.000173566	0.00155242	0.00150904	0.000666586
0.0054	0.00374928	0.00507266	0.00772894	0.0290598	0.0231263	0.0118266		0.0054	0.00352448	0.00373328	0.00517868	0.0202051	0.0225957	0.0120126		0.0054	0.000853057	0.000769946	0.000329496	0.00247545	0.00205218	0.000822642		0.0054	0.000622569	0.000432777	0.000177446	0.00158388	0.00154805	0.000700723
0.0056	0.00378247	0.00508423	0.0077375	0.0291371	0.0231824	0.0118559		0.0056	0.0035501	0.00374682	0.00517963	0.020227	0.0226301	0.0120418		0.0056	0.000886248	0.00078151	0.000338062	0.0025528	0.00210827	0.000851902		0.0056	0.000648187	0.000446317	0.000178396	0.00160578	0.00158249	0.000729984
0.0058	0.00381642	0.00509547	0.0077469	0.0292186	0.0232321	0.0118864		0.0058	0.0035888	0.00375654	0.00518393	0.020257	0.022653	0.0120662		0.0058	0.000920197	0.000792757	0.000347462	0.00263432	0.00215795	0.000882381		0.0058	0.000686894	0.000456032	0.000182697	0.00163575	0.00160535	0.000754367
0.006	0.00384073	0.00511342	0.00775847	0.0292959	0.0232839	0.0119105		0.006	0.00363252	0.00376322	0.00518681	0.0202917	0.0226834	0.0120927		0.006	0.000944509	0.000810704	0.000359027	0.00271156	0.00220976	0.00090646		0.006	0.000730612	0.000462716	0.000185576	0.00167045	0.00163583	0.000780884
0.0062	0.00386564	0.00513956	0.00777208	0.0293666	0.0233162	0.0119303		0.0062	0.00366503	0.00377401	0.00519356	0.0203365	0.0227218	0.0121171		0.0062	0.000969415	0.000836846	0.000372635	0.0027823	0.00224207	0.000926272		0.0062	0.000763122	0.000473499	0.000192321	0.00171527	0.00167424	0.000805268
0.0064	0.00389282	0.00516133	0.00778679	0.0294293	0.0233421	0.0119473		0.0064	0.00369184	0.00378912	0.00520422	0.0203747	0.0227587	0.0121403		0.0064	0.000996596	0.000858616	0.000387347	0.00284494	0.00226798	0.00094334		0.0064	0.000789924	0.000488614	0.000202982	0.00175344	0.00171112	0.000828432
0.0066	0.00391686	0.00517903	0.00780219	0.0294958	0.0233778	0.0119601		0.0066	0.00372344	0.00380632	0.00521299	0.0204117	0.022795	0.0121634		0.0066	0.00102064	0.000876311	0.000402743	0.00291153	0.00230364	0.000956141		0.0066	0.000821529	0.000505815	0.000211757	0.00179047	0.00174739	0.000851597
0.0068	0.0039369	0.00519186	0.00781397	0.0295462	0.0234274	0.0119763		0.0068	0.00376723	0.00382296	0.00521401	0.0204386	0.0228328	0.0121747		0.0068	0.00104067	0.00088915	0.000414524	0.00296192	0.00235332	0.000972296		0.0068	0.000865317	0.000522456	0.000212778	0.00181738	0.00178518	0.000862874
0.007	0.00395796	0.00520677	0.00782649	0.0295751	0.0234872	0.011994		0.007	0.00379883	0.00383757	0.00522968	0.0204605	0.022877	0.0121909		0.007	0.00106173	0.000904055	0.000427045	0.00299077	0.00241306	0.000989974		0.007	0.000896923	0.00053706	0.00022845	0.00183928	0.00182938	0.000879028
0.0072	0.00398281	0.00522154	0.00783515	0.0296002	0.0235171	0.0120187		0.0072	0.00382689	0.00385406	0.00525331	0.0204925	0.022927	0.0122125		0.0072	0.00108659	0.000918824	0.000435711	0.00301591	0.00244293	0.00101466		0.0072	0.000924978	0.000553553	0.000252075	0.00187127	0.00187936	0.000900669
0.0074	0.00400322	0.00523687	0.00784059	0.0296332	0.0235411	0.0120406		0.0074	0.00386678	0.00387155	0.00527123	0.0205227	0.0229788	0.0122427		0.0074	0.001107	0.000934153	0.000441144	0.00304891	0.00246701	0.00103661		0.0074	0.000964867	0.000571044	0.000269996	0.00190142	0.00193118	0.000930843
0.0076	0.00402645	0.0052522	0.0078541	0.029676	0.0235865	0.0120619		0.0076	0.00390514	0.00388467	0.00527973	0.0205571	0.0230218	0.0122671		0.0076	0.00113023	0.00094948	0.000454657	0.00309171	0.00251242	0.00105794		0.0076	0.00100323	0.000584167	0.000278498	0.00193584	0.00197416	0.000955227
0.0078	0.00404075	0.00526498	0.00786968	0.029717	0.0236307	0.0120909		0.0078	0.0039302	0.00389646	0.00528643	0.0205884	0.0230653	0.0122878		0.0078	0.00114452	0.000962264	0.000470238	0.00313264	0.00255662	0.0010869		0.0078	0.00102829	0.000595953	0.00028519	0.00196715	0.00201774	0.000975953
0.008	0.00406268	0.00527526	0.00788424	0.0297806	0.0236865	0.0121159		0.008	0.00395331	0.00390751	0.00529612	0.0206117	0.0231108	0.0123119		0.008	0.00116645	0.000972543	0.000484803	0.00319626	0.0026124	0.00111189		0.008	0.0010514	0.000607006	0.000294885	0.00199048	0.00206316	0.00100003
0.0082	0.00408823	0.00527856	0.00789428	0.0298656	0.0237392	0.0121345		0.0082	0.00397607	0.00391992	0.005312	0.0206406	0.0231565	0.012336		0.0082	0.00119201	0.000975845	0.00049484	0.0032813	0.00266513	0.00113048		0.0082	0.00107416	0.000619412	0.000310764	0.00201938	0.00210887	0.00102411
0.0084	0.00410772	0.00527851	0.00790695	0.0299562	0.0237856	0.0121531		0.0084	0.00400225	0.00393211	0.00533827	0.0206723	0.0231973	0.0123533		0.0084	0.0012115	0.000975795	0.000507503	0.00337191	0.00271145	0.00114908		0.0084	0.00110034	0.000631605	0.000337031	0.00205106	0.00214972	0.00104148
0.0086	0.00411514	0.00528222	0.00792287	0.030047	0.0238081	0.0121772		0.0086	0.0040397	0.00393866	0.00536555	0.0207019	0.0232281	0.0123725		0.0086	0.00121892	0.000979506	0.00052343	0.00346268	0.00273401	0.00117316		0.0086	0.00113779	0.000638155	0.000364313	0.00208061	0.0021805	0.00106069
0.0088	0.00413783	0.00529102	0.00794227	0.0301092	0.0238252	0.0122092		0.0088	0.00407207	0.00395171	0.00539096	0.0207435	0.0232485	0.0123856		0.0088	0.0012416	0.000988309	0.000542826	0.00352485	0.00275108	0.00120516		0.0088	0.00117016	0.000651203	0.000389726	0.00212229	0.00220092	0.00107379
0.009	0.00416804	0.00529737	0.00796163	0.0301626	0.0238569	0.012236		0.009	0.00410027	0.00396826	0.00540824	0.0207953	0.0232845	0.0123951		0.009	0.00127182	0.000994653	0.000562183	0.00357831	0.00278278	0.00123198		0.009	0.00119836	0.00066775	0.000407005	0.00217401	0.00223689	0.00108324
0.0092	0.00419831	0.00530331	0.00798149	0.030237	0.0238983	0.0122509		0.0092	0.00411976	0.00398611	0.00542039	0.0208537	0.0233202	0.0124051		0.0092	0.00130208	0.00100059	0.000582047	0.00365271	0.00282423	0.00124692		0.0092	0.00121785	0.000685599	0.000419153	0.0022324	0.00227255	0.0010933
0.0094	0.00421434	0.00531257	0.00800127	0.0303075	0.0239413	0.0122771		0.0094	0.00414635	0.00400182	0.00542946	0.0209057	0.0233546	0.0124176		0.0094	0.00131811	0.00100985	0.000601824	0.00372318	0.0028672	0.00127313		0.0094	0.00124444	0.000701312	0.000428229	0.0022844	0.00230699	0.00110579
0.0096	0.00423686	0.0053323	0.00801377	0.0303545	0.0239837	0.0123067		0.0096	0.00418819	0.00401604	0.00543174	0.0209692	0.0233848	0.0124341		0.0096	0.00134063	0.00102959	0.000614324	0.00377017	0.00290957	0.00130269		0.0096	0.00128628	0.000715532	0.000430504	0.00234791	0.00233717	0.00112225
0.0098	0.00426713	0.00534973	0.00802513	0.0303959	0.0240474	0.0123396		0.0098	0.00422537	0.00402674	0.00543671	0.0210199	0.0234031	0.0124506		0.0098	0.0013709	0.00104701	0.000625692	0.00381159	0.00297327	0.00133561		0.0098	0.00132346	0.000726229	0.000435475	0.00239865	0.00235545	0.00113871
0.01	0.00430108	0.00536723	0.00804221	0.0304297	0.0241208	0.0123744		0.01	0.00424514	0.00403016	0.00544084	0.0210652	0.0234284	0.0124667		0.01	0.00140485	0.00106451	0.000642765	0.00384535	0.00304673	0.00137036		0.01	0.00134323	0.00072965	0.00043961	0.00244397	0.00238075	0.00115487
0.0102	0.00432864	0.00539196	0.0080618	0.0304919	0.0242111	0.0124119		0.0102	0.00427159	0.00403873	0.00544689	0.021101	0.0234509	0.0124877		0.0102	0.00143241	0.00108924	0.000662353	0.0039076	0.00313695	0.00140785		0.0102	0.00136968	0.000738225	0.000445652	0.00247972	0.00240331	0.0011759
0.0104	0.00435035	0.00542204	0.00807945	0.0305732	0.0242964	0.0124387		0.0104	0.00429366	0.0040541	0.00545986	0.0211333	0.0234616	0.0125137		0.0104	0.00145412	0.00111932	0.000680006	0.00398891	0.00322229	0.00143467		0.0104	0.00139175	0.000753598	0.000458625	0.00251204	0.00241397	0.00120181
0.0106	0.00438132	0.00545213	0.00810095	0.0306646	0.0243629	0.0124679		0.0106	0.00430737	0.0040712	0.00547397	0.0211682	0.0234847	0.0125347		0.0106	0.00148509	0.00114941	0.000701509	0.00408029	0.00328874	0.00146393		0.0106	0.00140546	0.000770696	0.000472733	0.00254692	0.00243714	0.00122284
0.0108	0.00441094	0.00547549	0.00812554	0.0307387	0.0244388	0.0124945		0.0108	0.00431969	0.00408794	0.00548893	0.0212068	0.0235286	0.0125542		0.0108	0.00151471	0.00117278	0.000726099	0.00415436	0.00336463	0.00149045		0.0108	0.00141778	0.000787438	0.000487695	0.00258553	0.00248103	0.00124234
0.011	0.00443877	0.00550644	0.00815168	0.0307912	0.024504	0.0125164		0.011	0.00433515	0.0041067	0.0054993	0.0212621	0.0235826	0.012571		0.011	0.00154254	0.00120373	0.000752238	0.00420689	0.00342986	0.00151239		0.011	0.00143324	0.000806189	0.000498064	0.00264088	0.00253498	0.00125911
0.0112	0.00446416	0.00554322	0.00817319	0.0308399	0.0245686	0.0125353		0.0112	0.004349	0.00412117	0.00550882	0.0213289	0.0236109	0.012588		0.0112	0.00156794	0.0012405	0.00077375	0.00425562	0.00349447	0.00153129		0.0112	0.00144709	0.00082066	0.000507587	0.00270769	0.00256332	0.00127618
0.0114	0.00448858	0.00557943	0.00818353	0.0308902	0.0246271	0.0125524		0.0114	0.00435701	0.00413305	0.00551745	0.02139	0.0236271	0.0126045		0.0114	0.00159236	0.00127671	0.000784092	0.00430583	0.00355299	0.00154836		0.0114	0.0014551	0.000832542	0.000516213	0.00276877	0.00257948	0.00129263
0.0116	0.00451002	0.00561127	0.00819072	0.0309434	0.024693	0.0125694		0.0116	0.00436272	0.00415633	0.00552372	0.021435	0.0236548	0.0126225		0.0116	0.0016138	0.00130856	0.000791281	0.0043591	0.00361883	0.00156543		0.0116	0.00146081	0.000855824	0.000522481	0.00281374	0.00260721	0.00131062
0.0118	0.00454024	0.00563683	0.00819443	0.0310012	0.0247768	0.012581		0.0118	0.00436982	0.00418432	0.00552809	0.02148	0.0236883	0.0126386		0.0118	0.00164401	0.00133411	0.000794991	0.00441685	0.00370265	0.00157701		0.0118	0.00146791	0.000883809	0.00052685	0.0028587	0.00264074	0.00132677
0.012	0.00458133	0.00566168	0.00820532	0.0310582	0.0248444	0.0125953		0.012	0.00437761	0.00420999	0.00552926	0.0215405	0.023717	0.0126517		0.012	0.00168511	0.00135897	0.00080588	0.00447389	0.00377031	0.00159133		0.012	0.0014757	0.000909488	0.000528025	0.0029192	0.00266939	0.00133988
0.0122	0.00461469	0.00568358	0.00821667	0.0310909	0.0248993	0.0126161		0.0122	0.00439154	0.00423071	0.00553251	0.0216072	0.0237435	0.012663		0.0122	0.00171846	0.00138087	0.000817232	0.00450659	0.00382518	0.00161206		0.0122	0.00148963	0.000930205	0.000531271	0.00298594	0.00269591	0.00135115
0.0124	0.00463624	0.00570772	0.00822788	0.0311417	0.0249362	0.0126377		0.0124	0.00440386	0.00424443	0.00553414	0.0216611	0.0237673	0.0126816		0.0124	0.00174001	0.00140501	0.000828435	0.0045574	0.00386205	0.0016337		0.0124	0.00150195	0.000943924	0.000532903	0.00303983	0.00271968	0.00136975
0.0126	0.0046547	0.00573743	0.00823804	0.0311934	0.0249743	0.0126624		0.0126	0.00441284	0.00425565	0.00553508	0.0216978	0.0237938	0.0126947		0.0126	0.00175847	0.00143471	0.000838595	0.00460905	0.00390015	0.00165839		0.0126	0.00151093	0.000955146	0.000533843	0.00307651	0.0027462	0.00138285
0.0128	0.00470002	0.00576398	0.00824874	0.0312496	0.0250413	0.0126804		0.0128	0.00441883	0.00427157	0.00553536	0.0217306	0.0238203	0.0127069		0.0128	0.00180379	0.00146127	0.000849299	0.00466524	0.00396721	0.00167637		0.0128	0.00151692	0.000971066	0.000534121	0.00310938	0.00277272	0.00139505
0.013	0.00474815	0.00579507	0.00826153	0.0313168	0.025123	0.0127179		0.013	0.00442823	0.00428998	0.00553628	0.0217782	0.023845	0.0127206		0.013	0.00185193	0.00149235	0.000862092	0.00473249	0.00404889	0.00171386		0.013	0.00152631	0.000989477	0.000535041	0.00315697	0.00279741	0.00140876
0.0132	0.00478237	0.00582559	0.00827476	0.0313764	0.0252007	0.012763		0.0132	0.00444048	0.00430625	0.00554063	0.0218414	0.0238706	0.012738		0.0132	0.00188615	0.00152287	0.000875315	0.00479207	0.00412662	0.00175897		0.0132	0.00153857	0.00100575	0.000539398	0.00322019	0.00282301	0.00142614
0.0134	0.00481345	0.00584391	0.00828684	0.031416	0.0252718	0.0127928		0.0134	0.00445273	0.00431973	0.00554816	0.0219038	0.0239051	0.0127538		0.0134	0.00191723	0.00154119	0.000887394	0.0048317	0.00419763	0.00178884		0.0134	0.00155082	0.00101923	0.00054693	0.00328251	0.00285745	0.00144198
0.0136	0.00483587	0.00585801	0.00829453	0.0314604	0.0253086	0.0128255		0.0136	0.00446958	0.00433296	0.00555459	0.0219601	0.0239468	0.0127709		0.0136	0.00193964	0.0015553	0.000895084	0.00487609	0.00423451	0.00182145		0.0136	0.00156767	0.00103245	0.000553354	0.00333888	0.00289921	0.00145905
0.0138	0.00485108	0.0058774	0.00830104	0.0315222	0.0253672	0.0128559		0.0138	0.00448983	0.00434203	0.00555887	0.0220282	0.0239852	0.0127886		0.0138	0.00195486	0.00157468	0.000901598	0.00493793	0.00429303	0.00185193		0.0138	0.00158792	0.00104152	0.00055763	0.00340698	0.00293761	0.00147673
0.014	0.00488769	0.00589997	0.00831186	0.0315918	0.0254443	0.0128843		0.014	0.00450689	0.0043507	0.0055668	0.0220921	0.0240163	0.0128038		0.014	0.00199146	0.00159725	0.000912419	0.00500744	0.00437015	0.00188028		0.014	0.00160498	0.0010502	0.000565561	0.00347084	0.0029687	0.00149197
0.0142	0.00493365	0.00592082	0.0083246	0.0316638	0.0255199	0.0129105		0.0142	0.00452617	0.00436027	0.00557622	0.0221621	0.0240544	0.0128163		0.0142	0.00203743	0.0016181	0.000925155	0.0050795	0.00444574	0.00190649		0.0142	0.00162426	0.00105976	0.000574983	0.0035408	0.0030068	0.00150447
0.0144	0.00497194	0.00594159	0.00833973	0.0317245	0.0255814	0.0129382		0.0144	0.00455785	0.00437033	0.00558649	0.0222265	0.0240907	0.0128249		0.0144	0.00207571	0.00163887	0.000940283	0.00514014	0.00450731	0.00193423		0.0144	0.00165594	0.00106982	0.000585259	0.00360521	0.00304307	0.001513
0.0146	0.004997	0.00596051	0.00835666	0.031797	0.025625	0.0129675		0.0146	0.00458737	0.00438192	0.00559251	0.0222823	0.0241187	0.0128328		0.0146	0.00210078	0.0016578	0.000957213	0.00521265	0.00455089	0.00196349		0.0146	0.00168545	0.00108141	0.000591271	0.003661	0.00307111	0.00152093
0.0148	0.00500924	0.00598015	0.00837266	0.0318588	0.0256771	0.0129836		0.0148	0.00462022	0.00439358	0.00560015	0.0223438	0.0241556	0.0128428		0.0148	0.00211302	0.00167744	0.000973216	0.00527445	0.00460301	0.00197964		0.0148	0.00171831	0.00109307	0.000598914	0.00372257	0.00310799	0.00153098
0.015	0.00503133	0.00600135	0.00838412	0.0319093	0.025728	0.0129961		0.015	0.00464884	0.00440505	0.00561142	0.022407	0.0242047	0.012855		0.015	0.00213511	0.00169863	0.00098468	0.00532499	0.00465391	0.00199214		0.015	0.00174692	0.00110455	0.000610186	0.00378573	0.00315707	0.00154318
0.0152	0.00506377	0.00601666	0.0083918	0.0319864	0.0258112	0.0130001		0.0152	0.00466895	0.00441633	0.00561578	0.0224635	0.0242547	0.0128639		0.0152	0.00216754	0.00171394	0.000992357	0.00540212	0.00473712	0.0019961		0.0152	0.00176704	0.00111582	0.000614541	0.00384228	0.00320705	0.00155201
0.0154	0.00509533	0.00603316	0.00840072	0.0320676	0.0259322	0.0130032		0.0154	0.0046865	0.00442674	0.00562249	0.0225204	0.0242906	0.0128709		0.0154	0.00219911	0.00173045	0.00100128	0.00548329	0.00485812	0.00199915		0.0154	0.00178459	0.00112623	0.000621251	0.00389915	0.00324302	0.00155902
0.0156	0.00512755	0.00605004	0.00840793	0.0321356	0.0260539	0.0130083		0.0156	0.00470543	0.00443482	0.00563113	0.0225914	0.0243187	0.0128785		0.0156	0.00223132	0.00174733	0.00100849	0.00555128	0.00497974	0.00200433		0.0156	0.00180352	0.00113431	0.000629894	0.00397014	0.00327106	0.00156665
0.0158	0.00516485	0.00606305	0.0084188	0.0322129	0.0261493	0.0130132		0.0158	0.00472785	0.00444211	0.00564185	0.022653	0.0243558	0.0128916		0.0158	0.00226863	0.00176033	0.00101936	0.00562859	0.00507514	0.00200921		0.0158	0.00182594	0.00114161	0.000640615	0.00403174	0.00330824	0.00157975
0.016	0.00519572	0.00607606	0.00843199	0.0322809	0.0262337	0.013015		0.016	0.00474894	0.00445125	0.00564952	0.0226928	0.024397	0.0129075		0.016	0.00229949	0.00177334	0.00103255	0.00569656	0.00515957	0.00201104		0.016	0.00184703	0.00115074	0.000648283	0.00407158	0.00334939	0.0015956
0.0162	0.00522593	0.00609189	0.00844302	0.0323659	0.0263084	0.0130221		0.0162	0.00477567	0.004464	0.00565255	0.0227169	0.0244482	0.0129209		0.0162	0.0023297	0.00178918	0.00104358	0.00578159	0.00523424	0.00201805		0.0162	0.00187376	0.0011635	0.000651318	0.00409565	0.00340059	0.00160901
0.0164	0.00525912	0.00611435	0.00845504	0.0324288	0.0264004	0.0130242		0.0164	0.0048038	0.00447746	0.00565377	0.0227444	0.0245079	0.0129324		0.0164	0.0023629	0.00181163	0.0010556	0.00584452	0.00532629	0.00202018		0.0164	0.00190189	0.00117696	0.000652531	0.00412314	0.00346034	0.00162059
0.0166	0.00530168	0.00613903	0.00846905	0.0324852	0.0264995	0.0130281		0.0166	0.00481988	0.00448929	0.00565489	0.0227603	0.0245573	0.0129498		0.0166	0.00240545	0.00183631	0.00106961	0.00590084	0.00542535	0.00202414		0.0166	0.00191797	0.00118879	0.000653651	0.00413903	0.00350971	0.00163797
0.0168	0.00534142	0.00615824	0.00847918	0.0325372	0.026608	0.0130336		0.0168	0.00484432	0.00449659	0.0056613	0.0227713	0.024593	0.0129684		0.0168	0.0024452	0.00185552	0.00107974	0.00595285	0.00553385	0.00202963		0.0168	0.0019424	0.00119609	0.000660063	0.00415002	0.00354537	0.00165656
0.017	0.00536638	0.00617988	0.00848254	0.0326159	0.0267153	0.0130437		0.017	0.00486499	0.00450216	0.00566663	0.0227856	0.0246247	0.0129897		0.017	0.00247016	0.00187716	0.0010831	0.0060316	0.00564114	0.00203969		0.017	0.00196308	0.00120165	0.000665395	0.00416435	0.00357707	0.00167789
0.0172	0.00539248	0.00620199	0.00848536	0.0326835	0.0267945	0.0130553		0.0172	0.00488031	0.00450711	0.00567306	0.02281	0.0246539	0.0130068		0.0172	0.00249626	0.00189927	0.00108592	0.00609923	0.00572039	0.00205127		0.0172	0.0019784	0.0012066	0.000671827	0.00418876	0.00360633	0.00169496
0.0174	0.00541398	0.00623052	0.00848852	0.0327402	0.0268478	0.0130702		0.0174	0.00491045	0.00451523	0.00568783	0.0228479	0.0246957	0.0130202		0.0174	0.00251775	0.00192781	0.00108907	0.00615588	0.00577373	0.0020662		0.0174	0.00200854	0.00121472	0.0006866	0.00422668	0.00364809	0.00170837
0.0176	0.00542811	0.00625985	0.00849315	0.0327955	0.0268957	0.0130833		0.0176	0.00494101	0.00452904	0.00569442	0.0228974	0.0247304	0.013037		0.0176	0.00253188	0.00195713	0.00109371	0.00621122	0.00582158	0.00207931		0.0176	0.0020391	0.00122853	0.000693183	0.00427618	0.00368283	0.00172514
0.0178	0.00545302	0.00628212	0.0084981	0.032858	0.0269457	0.0130961		0.0178	0.00496461	0.00454592	0.00569688	0.0229446	0.0247676	0.0130531		0.0178	0.00255679	0.0019794	0.00109866	0.00627368	0.00587157	0.00209211		0.0178	0.0020627	0.00124542	0.000695647	0.00432338	0.00372002	0.00174129
0.018	0.00548393	0.00631374	0.00850334	0.0329498	0.0270219	0.0131056		0.018	0.00498689	0.00455701	0.00570337	0.0229821	0.0248091	0.0130687		0.018	0.00258771	0.00201103	0.00110389	0.00636547	0.00594777	0.00210156		0.018	0.00208498	0.0012565	0.000702135	0.00436085	0.00376147	0.00175684
0.0182	0.00550646	0.00635403	0.008511	0.0330691	0.0271176	0.0131095		0.0182	0.00500805	0.00456226	0.00570955	0.0230262	0.0248414	0.0130821		0.0182	0.00261023	0.00205132	0.00111156	0.00648473	0.00604347	0.00210552		0.0182	0.00210614	0.00126176	0.000708312	0.00440499	0.00379378	0.00177025
0.0184	0.00552687	0.00639753	0.00852188	0.0331995	0.0272121	0.0131135		0.0184	0.00503158	0.00456511	0.00571543	0.0230813	0.0248633	0.0130937		0.0184	0.00263064	0.00209481	0.00112244	0.00661521	0.00613796	0.00210948		0.0184	0.00212967	0.0012646	0.000714193	0.00446008	0.00381573	0.00178183
0.0186	0.00554831	0.0064277	0.00853461	0.0332925	0.027291	0.0131248		0.0186	0.00505288	0.0045717	0.00572511	0.0231366	0.0248822	0.0131043		0.0186	0.00265209	0.00212498	0.00113517	0.00670817	0.0062169	0.00212076		0.0186	0.00215097	0.00127119	0.000723875	0.00451533	0.00383462	0.0017925
0.0188	0.00556818	0.00644995	0.0085438	0.0333616	0.0273538	0.0131418		0.0188	0.0050762	0.0045775	0.00574294	0.023189	0.0249094	0.013112		0.0188	0.00267196	0.00214724	0.00114436	0.00677728	0.00627969	0.00213783		0.0188	0.00217429	0.00127699	0.000741705	0.0045677	0.00386175	0.00180012
0.019	0.00558275	0.00646746	0.00855139	0.0334202	0.0274081	0.0131586		0.019	0.0050943	0.00458862	0.00575464	0.023233	0.0249362	0.0131184		0.019	0.00268652	0.00216474	0.00115194	0.0068359	0.00633394	0.0021546		0.019	0.00219239	0.00128812	0.000753407	0.00461176	0.00388857	0.00180652
0.0192	0.00559217	0.00649259	0.00855568	0.0334908	0.0274648	0.0131745		0.0192	0.00510809	0.00460892	0.00575747	0.0232873	0.0249621	0.0131251		0.0192	0.00269594	0.00218987	0.00115624	0.00690646	0.00639063	0.00217044		0.0192	0.00220618	0.00130842	0.000756237	0.00466605	0.00391448	0.00181322
0.0194	0.00560451	0.00652712	0.00856177	0.0335778	0.0275291	0.0131848		0.0194	0.00511714	0.00462989	0.00576358	0.0233508	0.0249926	0.0131339		0.0194	0.00270829	0.00222441	0.00116233	0.00699348	0.00645494	0.00218081		0.0194	0.00221523	0.00132939	0.000762349	0.00472957	0.00394496	0.00182206
0.0196	0.00561935	0.00656243	0.00857196	0.0336608	0.0276016	0.0131955		0.0196	0.00512375	0.00464433	0.00577058	0.0234054	0.0250197	0.0131428		0.0196	0.00272312	0.00225971	0.00117251	0.00707647	0.00652748	0.00219148		0.0196	0.00222184	0.00134383	0.000769342	0.00478413	0.00397209	0.0018309
0.0198	0.00563202	0.00658706	0.00858553	0.0337536	0.0276644	0.0131921		0.0198	0.00513085	0.00465683	0.00577604	0.0234605	0.0250523	0.013151		0.0198	0.00273579	0.00228435	0.00118609	0.00716932	0.00659027	0.00218812		0.0198	0.00222894	0.00135632	0.000774805	0.00483926	0.0040047	0.00183913
0.02	0.00564144	0.00660563	0.00859903	0.0338508	0.0277144	0.0132034		0.02	0.0051445	0.00466778	0.00578763	0.023514	0.0250916	0.0131586		0.02	0.00274521	0.00230292	0.00119958	0.00726643	0.00664026	0.0021994		0.02	0.00224259	0.00136728	0.000786391	0.00489276	0.00404402	0.00184675
0.0202	0.00564924	0.00662858	0.0086139	0.0339362	0.027772	0.0132153		0.0202	0.00516538	0.00467812	0.00579842	0.0235653	0.0251331	0.0131662		0.0202	0.00275301	0.00232587	0.00121445	0.00735187	0.00669787	0.00221129		0.0202	0.00226347	0.00137762	0.000797188	0.00494408	0.00408547	0.00185437
0.0204	0.00565763	0.00664906	0.00862994	0.0339986	0.0278479	0.0132223		0.0204	0.0051894	0.00469676	0.00580844	0.0236178	0.0251797	0.0131717		0.0204	0.0027614	0.00234634	0.0012305	0.00741432	0.00677376	0.0022183		0.0204	0.00228749	0.00139625	0.000807206	0.00499659	0.0041321	0.00185986
0.0206	0.00566369	0.00666768	0.0086419	0.0340565	0.0279177	0.0132241		0.0206	0.00521467	0.00472215	0.00581471	0.0236732	0.0252126	0.0131757		0.0206	0.00276747	0.00236497	0.00124245	0.0074722	0.00684356	0.00222013		0.0206	0.00231276	0.00142165	0.000813476	0.0050519	0.00416502	0.00186382
0.0208	0.00567203	0.00668347	0.00865187	0.0341307	0.0279735	0.0132226		0.0208	0.00523938	0.0047486	0.00582249	0.0237261	0.0252431	0.0131885		0.0208	0.00277581	0.00238075	0.00125242	0.0075464	0.00689933	0.0022186		0.0208	0.00233747	0.00144809	0.000821253	0.00510488	0.0041955	0.00187662
0.021	0.00568005	0.00669549	0.00866037	0.0342069	0.0280265	0.0132415		0.021	0.00526041	0.00476804	0.00583454	0.0237859	0.0252681	0.0132004		0.021	0.00278382	0.00239277	0.00126092	0.00762254	0.00695237	0.0022375		0.021	0.00235849	0.00146754	0.000833306	0.00516468	0.00422049	0.00188851
0.0212	0.00568714	0.0067053	0.00867253	0.034275	0.0280804	0.013283		0.0212	0.00527906	0.00478496	0.00584001	0.0238558	0.0252919	0.0132132		0.0212	0.00279091	0.00240258	0.00127309	0.0076907	0.00700632	0.00227895		0.0212	0.00237715	0.00148446	0.000838772	0.0052345	0.00424427	0.00190131
0.0214	0.00569867	0.00672112	0.00868627	0.0343381	0.028135	0.0133372		0.0214	0.00529939	0.00479925	0.00584302	0.0239281	0.0253321	0.0132302		0.0214	0.00280245	0.0024184	0.00128683	0.00775373	0.00706088	0.0023332		0.0214	0.00239748	0.00149875	0.000841787	0.00530682	0.0042845	0.00191838
0.0216	0.00571703	0.0067407	0.00870254	0.0343906	0.0281996	0.0133744		0.0216	0.00532403	0.0048217	0.00584507	0.0239806	0.02538	0.01325		0.0216	0.0028208	0.00243799	0.00130309	0.00780632	0.00712549	0.00237039		0.0216	0.00242212	0.0015212	0.000843837	0.00535939	0.00433235	0.00193819
0.0218	0.00574091	0.00676393	0.00871173	0.0344414	0.0282575	0.0133991		0.0218	0.00534958	0.00486015	0.00585054	0.0240275	0.0254202	0.0132699		0.0218	0.00284468	0.00246121	0.00131228	0.00785705	0.0071834	0.00239508		0.0218	0.00244767	0.00155964	0.000849306	0.00540625	0.00437259	0.001958
0.022	0.00577014	0.00678929	0.00871609	0.0345055	0.0283325	0.0134137		0.022	0.00537757	0.00490095	0.00585194	0.0240746	0.025443	0.0132881		0.022	0.00287392	0.00248658	0.00131665	0.00792115	0.00725838	0.00240971		0.022	0.00247566	0.00160045	0.000850709	0.0054533	0.00439544	0.00197629
0.0222	0.00580084	0.00681502	0.00872327	0.0345558	0.0284264	0.0134265		0.0222	0.00538996	0.00493249	0.00585692	0.0241287	0.0254647	0.0133092		0.0222	0.00290462	0.00251231	0.00132383	0.00797143	0.00735226	0.00242251		0.0222	0.00248805	0.00163198	0.000855687	0.00550744	0.00441709	0.00199732
0.0224	0.00583463	0.00683621	0.00872825	0.0345929	0.0285084	0.0134387		0.0224	0.00540131	0.00495209	0.00586426	0.0241903	0.0254967	0.0133342		0.0224	0.0029384	0.0025335	0.0013288	0.00800859	0.00743425	0.0024347		0.0224	0.0024994	0.00165159	0.000863022	0.00556904	0.00444909	0.00202231
0.0226	0.00586349	0.00684818	0.00873404	0.0346659	0.0285815	0.0134439		0.0226	0.0054215	0.0049698	0.00587625	0.0242524	0.0255439	0.0133509		0.0226	0.00296726	0.00254546	0.0013346	0.00808162	0.0075074	0.00243988		0.0226	0.00251958	0.0016693	0.000875011	0.00563118	0.00449633	0.00203908
0.0228	0.00588314	0.0068531	0.00873874	0.0347481	0.0286544	0.0134561		0.0228	0.00545637	0.00499112	0.00588651	0.0242968	0.0255839	0.0133662		0.0228	0.00298692	0.00255039	0.0013393	0.0081638	0.00758025	0.00245207		0.0228	0.00255446	0.00169062	0.000885275	0.00567558	0.00453626	0.00205432
0.023	0.00591682	0.00686177	0.00874578	0.0347987	0.0287309	0.0134817		0.023	0.00548485	0.00501572	0.00589541	0.0243292	0.0256101	0.0133841		0.023	0.0030206	0.00255905	0.00134634	0.00821433	0.00765675	0.00247768		0.023	0.00258293	0.00171521	0.000894173	0.00570791	0.00456247	0.0020723
0.0232	0.00595343	0.00688285	0.00875533	0.0348534	0.0288144	0.0135067		0.0232	0.00549946	0.00503877	0.00590876	0.0243682	0.0256497	0.0134015		0.0232	0.0030572	0.00258014	0.00135588	0.00826913	0.00774026	0.00250267		0.0232	0.00259755	0.00173826	0.000907528	0.00574698	0.0046021	0.00208967
0.0234	0.00598857	0.00691484	0.00876373	0.0349156	0.0288775	0.0135256		0.0234	0.0055051	0.00506255	0.00592007	0.0244152	0.0257003	0.0134162		0.0234	0.00309234	0.00261213	0.00136428	0.00833124	0.00780336	0.00252157		0.0234	0.00260319	0.00176204	0.000918833	0.0057939	0.00465269	0.0021043
0.0236	0.00602186	0.00694035	0.00877099	0.0349717	0.0289259	0.0135384		0.0236	0.0055262	0.00507495	0.00592908	0.0244604	0.0257463	0.0134369		0.0236	0.00312564	0.00263763	0.00137155	0.00838734	0.00785182	0.00253437		0.0236	0.00262429	0.00177444	0.00092785	0.00583917	0.00469872	0.00212503
0.0238	0.00604493	0.00696672	0.00877848	0.0350223	0.0289579	0.0135457		0.0238	0.00555237	0.00508468	0.0059414	0.0244959	0.0257835	0.0134652		0.0238	0.0031487	0.002664	0.00137903	0.00843803	0.00788382	0.00254168		0.0238	0.00265046	0.00178417	0.00094016	0.00587462	0.0047359	0.00215337
0.024	0.00606209	0.0069923	0.00878161	0.035077	0.0289994	0.0135548		0.024	0.00557632	0.00509182	0.00595968	0.0245332	0.0258109	0.0134994		0.024	0.00316587	0.00268958	0.00138217	0.00849268	0.00792527	0.00255083		0.024	0.00267441	0.00179131	0.000958443	0.00591195	0.00476333	0.00218751
0.0242	0.00608646	0.00701744	0.00878739	0.0351372	0.0290366	0.0135634		0.0242	0.00558767	0.00510638	0.00597968	0.0245743	0.0258506	0.0135271		0.0242	0.00319023	0.00271473	0.00138795	0.00855285	0.00796246	0.00255936		0.0242	0.00268576	0.00180587	0.000978449	0.00595307	0.00480296	0.00221525
0.0244	0.00611229	0.00703468	0.00879436	0.0351953	0.0290786	0.0135756		0.0244	0.0056034	0.00513354	0.00599927	0.024616	0.0258841	0.013549		0.0244	0.00321606	0.00273197	0.00139491	0.008611	0.00800452	0.00257155		0.0244	0.00270149	0.00183304	0.000998034	0.00599472	0.00483648	0.00223719
0.0246	0.0061386	0.00705218	0.00881214	0.0352753	0.0291378	0.0135893		0.0246	0.00563925	0.00516417	0.00601652	0.0246709	0.0259167	0.0135615		0.0246	0.00324238	0.00274946	0.0014127	0.00869095	0.00806365	0.00258527		0.0246	0.00273734	0.00186367	0.00101529	0.00604968	0.0048691	0.00224969
0.0248	0.00615885	0.0070773	0.00883714	0.0353616	0.0292012	0.0136012		0.0248	0.00567308	0.00518942	0.00603305	0.0247309	0.0259606	0.0135783		0.0248	0.00326263	0.00277459	0.0014377	0.00877733	0.00812705	0.00259716		0.0248	0.00277117	0.00188891	0.00103181	0.00610967	0.00491299	0.00226645
0.025	0.00618143	0.00710409	0.00885486	0.0354528	0.0292487	0.0136158		0.025	0.00568979	0.00520176	0.00604544	0.0247835	0.0260109	0.0135999		0.025	0.0032852	0.00280138	0.00145542	0.00886844	0.0081746	0.00261179		0.025	0.00278788	0.00190125	0.0010442	0.00616222	0.00496328	0.00228809
0.0252	0.0062104	0.00713057	0.00886927	0.0355588	0.029299	0.0136274		0.0252	0.00572599	0.00521187	0.00605408	0.0248425	0.0260886	0.0136234		0.0252	0.00331417	0.00282785	0.00146983	0.00897451	0.00822489	0.00262337		0.0252	0.00282408	0.00191136	0.00105285	0.00622129	0.005041	0.00231156
0.0254	0.0062391	0.00715601	0.00889072	0.0356659	0.0293587	0.0136341		0.0254	0.00578851	0.00522947	0.00605986	0.0249148	0.0261776	0.0136463		0.0254	0.00334287	0.00285329	0.00149127	0.00908154	0.00828463	0.00263007		0.0254	0.0028866	0.00192897	0.00105863	0.00629357	0.00513	0.00233442
0.0256	0.00625241	0.00717772	0.00891054	0.035796	0.0294386	0.0136429		0.0256	0.00585046	0.00525416	0.0060644	0.0249985	0.0262331	0.0136682		0.0256	0.00335619	0.00287501	0.0015111	0.00921165	0.00836448	0.00263891		0.0256	0.00294855	0.00195365	0.00106317	0.00637725	0.00518547	0.00235637
0.0258	0.00627943	0.00719392	0.00892803	0.0359149	0.0295526	0.0136582		0.0258	0.00589244	0.00527724	0.00606895	0.0250851	0.0262879	0.0136838		0.0258	0.00338321	0.00289121	0.00152859	0.00933056	0.00847848	0.00265415		0.0258	0.00299053	0.00197674	0.00106772	0.00646383	0.00524034	0.00237191
0.026	0.00632048	0.00720774	0.00894615	0.0360129	0.0296782	0.0136801		0.026	0.00592836	0.00529471	0.00607511	0.0251417	0.026334	0.0136944		0.026	0.00342425	0.00290503	0.00154671	0.00942858	0.00860405	0.0026761		0.026	0.00302645	0.00199421	0.00107388	0.00652047	0.00528636	0.00238258
0.0262	0.00636038	0.00722254	0.00896177	0.0361092	0.0297894	0.0136978		0.0262	0.00597904	0.00530891	0.00608871	0.0251668	0.0263931	0.0137106		0.0262	0.00346415	0.00291983	0.00156233	0.00952492	0.0087153	0.00269378		0.0262	0.00307713	0.0020084	0.00108747	0.00654558	0.00534549	0.00239873
0.0264	0.00638843	0.00723954	0.00898111	0.0362209	0.0298586	0.0137121		0.0264	0.00603446	0.00532037	0.00610433	0.0252118	0.0264739	0.0137292		0.0264	0.0034922	0.00293683	0.00158167	0.00963655	0.00878449	0.0027081		0.0264	0.00313255	0.00201987	0.0011031	0.00659054	0.00542626	0.00241733
0.0266	0.00640196	0.00725248	0.0090006	0.0363512	0.0299302	0.0137225		0.0266	0.00608395	0.00533141	0.00611734	0.0252715	0.0265656	0.0137447		0.0266	0.00350574	0.00294977	0.00160115	0.00976691	0.00885612	0.00271846		0.0266	0.00318204	0.0020309	0.00111611	0.00665021	0.005518	0.00243287
0.0268	0.00642752	0.00726458	0.00901895	0.0364582	0.0300418	0.0137334		0.0268	0.00613575	0.00534546	0.00612835	0.025328	0.0266525	0.0137536		0.0268	0.00353129	0.00296187	0.0016195	0.00987386	0.00896767	0.00272944		0.0268	0.00323384	0.00204495	0.00112711	0.00670675	0.00560487	0.00244171
0.027	0.00646596	0.00727609	0.00903299	0.0365465	0.0301918	0.013753		0.027	0.00618796	0.00536087	0.00613803	0.0253756	0.0267131	0.013763		0.027	0.00356974	0.00297337	0.00163355	0.00996217	0.00911763	0.00274894		0.027	0.00328605	0.00206037	0.0011368	0.00675436	0.00566553	0.00245116
0.0272	0.00650035	0.00730064	0.0090435	0.0366274	0.030346	0.0137718		0.0272	0.00622395	0.00537516	0.00615049	0.0254109	0.0267598	0.013781		0.0272	0.00360412	0.00299793	0.00164405	0.0100431	0.00927186	0.00276784		0.0272	0.00332204	0.00207465	0.00114926	0.00678965	0.00571216	0.00246914
0.0274	0.00652395	0.00732549	0.00905477	0.0367217	0.0304792	0.0137889		0.0274	0.00624289	0.00538831	0.00615844	0.025453	0.0268152	0.0138042		0.0274	0.00362773	0.00302278	0.00165533	0.0101374	0.00940505	0.00278491		0.0274	0.00334097	0.0020878	0.0011572	0.00683172	0.00576763	0.00249231
0.0276	0.0065389	0.00734398	0.00906641	0.0368136	0.0305868	0.0138039		0.0276	0.00625883	0.0053999	0.00616157	0.0254989	0.026878	0.0138212		0.0276	0.00364267	0.00304126	0.00166697	0.0102292	0.00951265	0.00279985		0.0276	0.00335692	0.0020994	0.00116033	0.00687762	0.00583042	0.00250937
0.0278	0.00655	0.00737003	0.00907867	0.0369075	0.0306892	0.0138258		0.0278	0.00628452	0.00541301	0.00616573	0.0255575	0.0269304	0.0138352		0.0278	0.00365377	0.00306731	0.00167923	0.0103231	0.00961506	0.00282179		0.0278	0.0033826	0.0021125	0.00116449	0.00693623	0.00588284	0.0025234
0.028	0.00656933	0.00739694	0.00909433	0.0370035	0.0307873	0.0138584		0.028	0.0063148	0.00542405	0.00617074	0.0256099	0.0269908	0.013852		0.028	0.0036731	0.00309422	0.00169489	0.0104192	0.0097132	0.0028544		0.028	0.00341289	0.00212354	0.00116951	0.00698866	0.00594319	0.00254016
0.0282	0.00659044	0.00741304	0.00910779	0.0370895	0.0308858	0.0138828		0.0282	0.00634244	0.00543526	0.00618155	0.0256572	0.0270594	0.0138773		0.0282	0.00369422	0.00311032	0.00170834	0.0105052	0.00981165	0.00287879		0.0282	0.00344052	0.00213475	0.00118031	0.00703594	0.00601177	0.00256546
0.0284	0.00660804	0.00742762	0.00911791	0.0371596	0.0309766	0.0139044		0.0284	0.00636095	0.00544797	0.00619361	0.0257	0.0271097	0.0139026		0.0284	0.00371181	0.00312491	0.00171847	0.0105753	0.00990248	0.00290043		0.0284	0.00345904	0.00214746	0.00119238	0.00707874	0.00606206	0.00259076
0.0286	0.0066265	0.00744568	0.00912995	0.0372511	0.0310504	0.013941		0.0286	0.00636993	0.00545937	0.00620315	0.0257637	0.0271533	0.0139175		0.0286	0.00373028	0.00314296	0.00173051	0.0106668	0.00997624	0.002937		0.0286	0.00346802	0.00215886	0.00120191	0.00714245	0.00610565	0.00260569
0.0288	0.00665341	0.00747024	0.00913834	0.0373299	0.0311293	0.0139797		0.0288	0.00638156	0.00547261	0.00621076	0.0258204	0.0271865	0.0139249		0.0288	0.00375719	0.00316753	0.00173889	0.0107456	0.0100552	0.00297571		0.0288	0.00347965	0.0021721	0.00120953	0.00719913	0.00613887	0.00261301
0.029	0.00668319	0.0074996	0.00914555	0.0374096	0.0312223	0.014005		0.029	0.00640474	0.0054837	0.00621439	0.0258797	0.0272389	0.013937		0.029	0.00378697	0.00319688	0.00174611	0.0108253	0.0101481	0.00300101		0.029	0.00350283	0.0021832	0.00121316	0.00725845	0.0061913	0.0026252
0.0292	0.00669868	0.00752749	0.00914928	0.037492	0.0313171	0.0140172		0.0292	0.00642458	0.0054969	0.00621442	0.0259314	0.0273041	0.0139535		0.0292	0.00380245	0.00322478	0.00174984	0.0109077	0.0102429	0.0030132		0.0292	0.00352267	0.0021964	0.00121318	0.00731018	0.00625652	0.00264166
0.0294	0.00672727	0.00754872	0.00915125	0.0375707	0.0313987	0.0140239		0.0294	0.00643349	0.00551525	0.00622035	0.0259731	0.0273727	0.0139724		0.0294	0.00383104	0.003246	0.00175181	0.0109864	0.0103246	0.00301991		0.0294	0.00353158	0.00221474	0.00121911	0.00735184	0.0063251	0.00266055
0.0296	0.00676842	0.00756903	0.00916082	0.0376556	0.0314688	0.0140355		0.0296	0.00645382	0.00553415	0.00622907	0.026013	0.0274276	0.0139947		0.0296	0.00387219	0.00326631	0.00176138	0.0110713	0.0103947	0.00303149		0.0296	0.00355191	0.00223364	0.00122784	0.00739174	0.00637996	0.0026828
0.0298	0.00681347	0.0075936	0.00917325	0.0377417	0.0315158	0.0140553		0.0298	0.0064871	0.00555283	0.00623945	0.0260504	0.0274724	0.0140218		0.0298	0.00391724	0.00329088	0.00177381	0.0111574	0.0104417	0.0030513		0.0298	0.00358518	0.00225233	0.00123821	0.00742918	0.00642477	0.00270993
0.03	0.00684904	0.00761702	0.00918438	0.0378061	0.0315511	0.014083		0.03	0.00651654	0.00556317	0.00624859	0.0261027	0.0275132	0.0140437		0.03	0.00395281	0.0033143	0.00178494	0.0112218	0.010477	0.00307904		0.03	0.00361463	0.00226266	0.00124736	0.00748148	0.00646561	0.00273188
0.0302	0.006876	0.0076424	0.00919803	0.0378483	0.0315999	0.0141093		0.0302	0.00653423	0.00558222	0.00626025	0.0261514	0.0275632	0.0140611		0.0302	0.00397978	0.00333968	0.00179859	0.011264	0.0105258	0.00310525		0.0302	0.00363231	0.00228172	0.00125902	0.00753016	0.0065156	0.00274925
0.0304	0.00690297	0.00766457	0.00921273	0.037886	0.0316706	0.0141312		0.0304	0.00653966	0.00561025	0.00626946	0.0262117	0.0276147	0.0140818		0.0304	0.00400674	0.00336185	0.00181329	0.0113017	0.0105965	0.00312719		0.0304	0.00363774	0.00230974	0.00126823	0.00759047	0.00656711	0.00276997
0.0306	0.00693616	0.00767839	0.00923051	0.0379432	0.0317462	0.0141501		0.0306	0.00654975	0.00564217	0.00627566	0.0262779	0.0276732	0.0140876		0.0306	0.00403993	0.00337568	0.00183107	0.0113589	0.0106721	0.00314609		0.0306	0.00364784	0.00234166	0.00127442	0.00765662	0.00662563	0.00277577
0.0308	0.00697195	0.00768286	0.00925244	0.0380218	0.0317968	0.0141818		0.0308	0.00657029	0.00566915	0.00628186	0.0263492	0.0277199	0.0140977		0.0308	0.00407572	0.00338014	0.00185299	0.0114375	0.0107227	0.00317779		0.0308	0.00366837	0.00236864	0.00128063	0.00772794	0.00667226	0.00278582
0.031	0.00700249	0.00769128	0.00926704	0.0381247	0.0318465	0.0142147		0.031	0.00658574	0.00568785	0.00628806	0.0263982	0.0277653	0.0141123		0.031	0.00410626	0.00338856	0.0018676	0.0115403	0.0107724	0.00321071		0.031	0.00368383	0.00238734	0.00128682	0.00777698	0.00671768	0.00280045
0.0312	0.00702501	0.00770633	0.00927879	0.038221	0.0319135	0.0142312		0.0312	0.00660001	0.00570305	0.00629701	0.0264325	0.0278208	0.0141208		0.0312	0.00412879	0.00340361	0.00187935	0.0116367	0.0108394	0.00322717		0.0312	0.0036981	0.00240255	0.00129578	0.00781127	0.00677315	0.00280899
0.0314	0.0070431	0.00772545	0.00928676	0.038301	0.0320022	0.0142531		0.0314	0.00661742	0.00571247	0.00630608	0.0264847	0.027868	0.0141306		0.0314	0.00414687	0.00342273	0.00188732	0.0117167	0.0109281	0.00324911		0.0314	0.0037155	0.00241196	0.00130484	0.0078634	0.00682039	0.00281874
0.0316	0.00705517	0.00774805	0.0092964	0.0383844	0.032083	0.0142802		0.0316	0.00663538	0.00572698	0.00631693	0.0265426	0.0278936	0.0141428		0.0316	0.00415895	0.00344534	0.00189695	0.0118001	0.0110089	0.00327624		0.0316	0.00373347	0.00242648	0.00131569	0.00792137	0.006846	0.00283093
0.0318	0.0070614	0.00776613	0.00930902	0.0384861	0.0321443	0.0143089		0.0318	0.006658	0.00574248	0.00632836	0.0265859	0.0279314	0.0141528		0.0318	0.00416517	0.00346342	0.00190958	0.0119018	0.0110701	0.00330489		0.0318	0.00375609	0.00244197	0.00132713	0.00796462	0.00688379	0.00284099
0.032	0.00707125	0.00778536	0.00932154	0.0385914	0.0322095	0.0143385		0.032	0.00668828	0.00575849	0.00633962	0.0266135	0.027978	0.014165		0.032	0.00417503	0.00348265	0.0019221	0.0120071	0.0111354	0.00333446		0.032	0.00378637	0.00245799	0.00133838	0.00799229	0.00693042	0.00285318
0.0322	0.0070902	0.00780794	0.00933669	0.0386844	0.0322811	0.0143665		0.0322	0.00670993	0.00577507	0.00635042	0.0266776	0.0280451	0.0141806		0.0322	0.00419398	0.00350523	0.00193725	0.0121001	0.011207	0.0033625		0.0322	0.00380802	0.00247457	0.00134918	0.00805638	0.00699748	0.00286873
0.0324	0.00710439	0.00782473	0.00934536	0.0387962	0.0323518	0.014393		0.0324	0.00672991	0.00579168	0.00635719	0.0267625	0.0281131	0.0142062		0.0324	0.00420816	0.00352201	0.00194592	0.0122119	0.0112777	0.00338901		0.0324	0.003828	0.00249118	0.00135595	0.00814124	0.00706545	0.00289433
0.0326	0.00711701	0.00783685	0.00935675	0.0389001	0.0324353	0.0144189		0.0326	0.00675692	0.00580825	0.00636332	0.026844	0.0281731	0.0142397		0.0326	0.00422078	0.00353414	0.00195731	0.0123158	0.0113612	0.00341492		0.0326	0.00385501	0.00250774	0.00136208	0.00822277	0.00712549	0.00292786
[truncated: 836 more rows]

## Sheet: ETA-MP
DATA preBotC to 7n								DATA preBotC to 7n								DATA preBotC to 7n								DATA preBotC to 7n									MP amplitude peak					Statistics
[truncated: 2,002 more rows]
