# Supplementary material for: Selective transduction and photoinhibition of pre-Bötzinger complex neurons that project to the facial nucleus in rats affects nasofacial activity
Source: eLife. 2023 Sep 29;12:e85398. doi: 10.7554/eLife.85398 (PMC10653671; doi:10.7554/eLife.85398)
Supplement: Figure 8—figure supplement 1—source data 1. [file elife-85398-fig8-figsupp1-data1.xlsx]

## Sheet: fR - mix vs control
Two Way Analysis of Variance SigmaPlot v11						Analysis Summary				Mann-Whitney Analysis											DATA mix Dio-GtACR2+cre									DATA control								fR GtACr2-GFP						fR GtACr2-GFP
																					fR									fR
Two Way Analysis of Variance						Table Analyzed	fR				Below threshold?	P value	Mean rank of 50 HZ mix	Mean rank of control	Mean rank diff.	Mann-Whitney U	Adjusted P Value				time	20210715A	20210715C	20210715D	20210713A	20210713B				time	20210917B	20210917C	20210917D					rats	basal	P1	P2	recovery		rats	basal	P1	P2	recovery
										off	No	>0.999999	4.5	4.5	0	7.5	>0.999999				0	55.0781	63.7881	62.6238	74.6576	73.8076				0	55.2419	82.427	47.3247					20210715A	55.402	0	59.9267	79.4601		20210715A	100	0	108.167	143.425
Data source: Data 1 in Notebook1						Column A	50 HZ mix			P1	No	0.017857	3	7	-4	0	0.071429				1	54.7982	60.2761	61.3258	73.633	73.87				1	57.4308	85.5948	49.3567					20210715C	63.2779	0	51.1426	85.9974		20210715C	100	0	80.8223	135.904
						vs.	vs.			P2	No	0.785714	4.2	5	-0.8	6	>0.999999				2	54.8771	61.2542	61.2271	79.6025	70.2189				2	57.6974	84.4639	48.2836					20210715D	60.8272	0	62.0108	74.993		20210715D	100	0	101.946	123.289
General Linear Model						Column B	control			off 2	No	0.035714	6	2	4	0	0.142857				3	51.0538	63.6686	58.9317	72.9748	74.4322				3	50.6646	77.2191	47.6278					20210713A	77.2056	0	57.8361	92.9383		20210713A	100	0	74.9118	120.378
																					4	58.5144	60.4878	61.3558	81.2326	73.6206				4	51.454	86.1028	48.843					20210713B	72.7794	0	66.0365	98.5955		20210713B	100	0	90.735	135.472
Dependent Variable: data						Test details															5	57.0913	63.452	60.7472	73.9551	73.9137				5	55.8874	84.4712	48.1874
						Test name	Mann-Whitney test														6	53.2346	58.9651	62.4994	75.211	72.5168				6	57.5206	76.9713	46.4288
Normality Test:	Failed	(P < 0.050)				Comparison for each test	Compare ranks														7	54.6544	60.0014	58.5518	75.9384	74.4035				7	67.2218	83.4365	46.2021
						Multiple comparisons	Set P value threshold														8	52.9557	56.6276	61.0143	76.5058	77.0798				8	54.4462	80.4838	48.45
Equal Variance Test:	Failed	(P < 0.050)				Method	Bonferroni-Dunn method														9	57.8551	63.1096	60.61	71.8743	73.8209				9	53.8743	75.8951	50.9461
						Alpha	0.05														10	57.8795	60.766	60.686	74.9356	73.3161				10	58.5906	81.6532	44.4834					fR control						fR control
																					11	53.2927	59.8825	61.6609	78.4682	73.0305				11	54.1844	80.1795	46.0169
						Number of tests performed	4														12	53.2331	64.6147	60.4889	77.6459	70.2551				12	51.5882	77.6601	46.9841					rats	basal	P1	P2	recovery		rats	basal	P1	P2	recovery
						Number of rows omitted	0														13	56.902	67.855	60.8948	75.9147	73.7292				13	59.3665	77.7581	47.6841					20210917B	54.3249	54.9117	53.4067	56.7601		20210917B	100	101.08	98.3098	104.483
																					14	55.9547	63.0155	63.6626	77.0017	75.4404				14	58.2142	84.9745	50.6396					20210917C	81.3121	79.4351	80.9106	83.9499		20210917C	100	97.6916	99.5063	103.244
																					15	55.9678	62.648	61.5944	70.6284	76.6633				15	49.8455	72.2126	46.9898					20210917D	47.7953	48.09	46.3961	47.3588		20210917D	100	100.617	97.0725	99.0869
																					16	0	0	0	0	0				16	52.7139	80.0148	46.6353
						Statistics - only P1 period															17	0	0	0	0	0				17	55.5401	78.3275	47.3141
																					18	0	0	0	0	0				18	55.1419	90.6199	48.4342
						Normality Test:	Failed	(P < 0.050)													19	0	0	0	0	0				19	55.9209	67.7563	49.8275
																					20	0	0	0	0	0				20	54.5268	82.4546	49.0473
																					21	0	0	0	0	0				21	53.7371	85.9059	50.3846
						Test execution ended by user request, Rank Sum Test begun															22	0	0	0	0	0				22	53.9044	86.9506	46.9836
																					23	0	0	0	0	0				23	55.2793	82.796	43.5924
						Mann-Whitney Rank Sum Test	Thursday, November 24, 2022, 9:45:18 AM														24	0	0	0	0	0				24	58.6838	77.1151	46.6234
																					25	0	35.8682	0	0	0				25	58.023	79.0837	42.7599
						Data source: Data 1 in Notebook3															26	8.33224	49.8169	45.7685	27.0597	0				26	51.8342	87.1077	42.7143
																					27	19.8716	46.2029	54.3668	44.5442	0				27	53.2525	88.6672	45.8672
						Group	N	Missing	Median	0.25	0.75										28	69.0027	52.1319	61.2313	57.9706	0				28	56.5349	85.4753	47.4903
						mix GtAR2+cre	5	0	0	0	0										29	70.9512	53.2837	59.6435	63.4543	45.0053				29	52.0285	84.1441	51.5251
						control	3	0	100.617	98.423	100.964										30	71.932	54.7231	57.8149	62.7818	57.2751				30	49.6849	90.5183	47.241
																					31	58.7119	52.4153	59.5341	70.4194	56.2258				31	51.911	87.1893	43.6636
						Mann-Whitney U Statistic= 0.000															32	44.9065	53.5407	64.5016	69.2888	58.3377				32	57.4199	87.8618	44.1768
																					33	33.4301	62.8344	67.7139	69.5951	68.3225				33	60.597	83.8467	45.9158
						T = 21.000 n(small)= 3 n(big)= 5 P(est.)= 0.017 P(exact)= 0.036															34	41.8951	65.5199	60.2449	73.8679	84.7975				34	56.5524	86.318	46.561
																					35	74.1234	62.7398	69.5968	55.9729	74.2491				35	51.3891	88.7245	45.7785
																					36	68.0976	63.4159	71.9367	45.3937	74.0701				36	52.6421	88.2264	44.3956
																					37	64.1776	68.0057	67.3686	70.5325	76.5795				37	57.0712	91.7964	47.6351
																					38	69.8976	65.9638	68.4928	82.0097	76.2302				38	60.3939	83.4341	47.0841
																					39	67.2548	72.6564	70.4705	73.1682	77.1149				39	54.7545	83.5095	46.7486
																					40	66.2148	67.6813	68.1917	69.0593	77.0143				40	60.5452	80.0292	46.0769
																					41	68.5493	74.8661	65.8571	72.3065	80.3489				41	55.7047	84.2091	43.2386
																					42	65.4501	70.3428	69.4491	71.8258	83.1735				42	60.2093	88.3482	48.4014
																					43	68.5741	74.3464	74.1495	71.4014	84.8777				43	56.6229	87.9081	49.4315
																					44	69.8002	68.7314	72.113	72.1968	81.7243				44	52.6094	88.2611	48.7149
																					45	71.6651	71.2792	68.1775	72.7555	83.1984				45	57.1013	88.0865	48.5443
																					46	67.9366	75.1905	70.9748	73.4093	82.7336				46	54.0726	88.3653	48.9536
																					47	77.3893	131	62.3594	73.9303	84.7818				47	51.3413	90.0411	48.0944
																					48	71.8591	104.634	69.9412	69.2977	76.0559				48	52.5196	88.5804	46.2919
																					49	105.697	102.659	67.8303	68.547	66.5997				49	57.1098	85.1799	45.6562
																					50	77.8326	93.7938	68.817	71.0287	118.067				50	61.7822	89.0694	46.8037
																					51	79.0636	89.9869	71.7278	98.6709	111.116				51	55.232	76.6485	47.1737
																					52	83.5796	94.018	70.9847	106.002	104.016				52	44.6331	82.6262	50.5378
																					53	78.1172	98.59	76.3924	80.7597	98.9382				53	55.1748	87.4971	48.875
																					54	79.9845	93.8701	64.7382	130.02	99.5788				54	55.0647	75.2505	46.6844
																					55	77.974	86.0925	67.8709	107.41	98.3102				55	55.1674	83.1918	46.6635
																					56	77.3017	84.4557	68.368	101.821	99.1886				56	55.9747	75.4541	46.6858
																					57	83.1129	90.0718	66.6411	99.4937	95.2713				57	57.0362	83.9845	48.1832
																					58	73.7004	79.6919	65.2632	97.1817	92.2605				58	57.5476	85.5933	47.1989
																					59	73.6223	94.9878	69.8076	89.4075	89.965				59	53.8956	73.0562	46.3152
																					60	77.8732	75.3126	65.9746	90.1992	92.1139				60	51.1539	72.853	48.6839
																					61	74.028		55.8051	93.2279	86.7272				61	55.0384		44.2482
																					62			49.1344	88.2406	86.4326				62	54.56
																					63			97.5763	91.0512	86.1157
																					64			70.0727	95.8681
																					65			71.3118	82.4807
																					66			71.152
																					67			72.5231
																					68			75.0533
																					69			76.131
																					70			75.9929
																					71			78.7906
																					72			72.3794
																					73			74.4614
																					74			75.7056
																					75			75.7042

## Sheet: DIA activity (AUC) mix vs contr
Two Way Analysis of Variance SigmaPlot v11					Analysis Summary				Mann-Whitney Analysis											DATA mix Dio-GtACR2+cre							DATA control							DATA mix Dio-GtACR2+cre									DATA control
										Below threshold?	P value	Mean rank of GtACR2	Mean rank of control	Mean rank diff.	Mann-Whitney U	Adjusted P Value				AUC DIA							AUC DIA							DIA amplitude									DIA amplitude
Two Way Analysis of Variance					Table Analyzed	DIA activity			off	No	>0.999999	4.5	4.5	0	7.5	>0.999999				rats	off	P1	P2	off			rats	off	P1	P2	off			time	20210715A	20210715C	20210715D	20210713A	20210713B				time	20210917B	20210917C	20210917D
									P1	No	0.035714	3	7	-4	0	0.142857				20210715A	0.15686	0.0785516	0.125726	0.164041			20210917B	0.106189	0.105559	0.107284	0.104577			0	1.34324	1.19571	0.47953	0.99419	1.08971				0	0.42324	0.46856	0.47523
Data source: Data 1 in MP activity- sigma					Column A	50 HZ mix			P2	No	0.25	3.6	6	-2.4	3	>0.999999				20210715C	0.123199	0.0305697	0.128619	0.134968			20210917C	0.123998	0.12945	0.122728	0.137512			1	1.33283	1.29234	0.4858	1.00153	1.14354				1	0.39612	0.44945	0.56367
					vs.	vs.			off2	No	0.785714	4.8	4	0.8	6	>0.999999				20210715D	0.04963	0.0104555	0.034007	0.060562			20210917D	0.089928	0.0869585	0.0882375	0.0861823			2	1.30861	1.39172	0.43137	1.06979	1.12254				2	0.45478	0.51507	0.56622
General Linear Model					Column B	control														20210713A	0.134627	0.0329914	0.126259	0.126942										3	1.34324	1.21023	0.47821	0.87359	1.02472				3	0.41967	0.43013	0.54538
																				20210713B	0.139796	0.0378294	0.093615	0.137756										4	1.36621	1.21526	0.46292	1.08994	1.12668				4	0.43443	0.47293	0.55775
Dependent Variable: data					Test details																													5	1.39965	1.21002	0.49486	1.11002	1.07755				5	0.4493	0.47461	0.61395
					Test name	Mann-Whitney test																												6	1.27261	1.18712	0.45116	1.00007	1.10964				6	0.4418	0.4615	0.59784
Normality Test:	Failed	(P < 0.050)			Comparison for each test	Compare ranks																												7	1.35627	1.19099	0.51819	1.10074	1.04631				7	0.35771	0.46459	0.56498
					Multiple comparisons	Set P value threshold																												8	1.32467	1.24924	0.48439	1.06251	1.1272				8	0.46524	0.51486	0.55137
Equal Variance Test:	Passed	(P = 0.326)			Method	Bonferroni-Dunn method														DATA mix Dio-GtACR2+cre							DATA control							9	1.30091	1.0598	0.48302	1.11724	1.16018				9	0.46025	0.48223	0.58237
					Alpha	0.05														AUC DIA							AUC DIA							10	1.29123	1.17607	0.45833	1.06886	1.10783				10	0.41861	0.45394	0.60976
																				rats	off	P1	P2	off			rats	off	P1	P2	off			11	1.36921	1.27778	0.42751	1.16664	1.07267				11	0.42371	0.4495	0.56868
					Number of tests performed	4														20210715A	100	50.0775	80.1517	104.578			20210917B	100	99.4062	101.031	98.4818			12	1.45239	1.10464	0.46479	1.0462	1.12499				12	0.42883	0.54305	0.52408
					Number of rows omitted	0														20210715C	100	24.8133	104.399	109.553			20210917C	100	104.397	98.9758	110.899			13	1.36302	1.28997	0.41715	1.02968	1.12968				13	0.44971	0.46587	0.5088
																				20210715D	100	21.0668	68.5211	122.027			20210917D	100	96.6979	98.1202	95.8348			14	1.22766	1.23829	0.46743	1.01167	1.15605				14	0.47381	0.40418	0.54843
																				20210713A	100	24.5057	93.7843	94.2916										15	1.29958	1.20479	0.35122	1.03346	1.13239				15	0.45133	0.46676	0.58048
																				20210713B	100	27.0605	66.9656	98.5412										16	0.289569	0.0706488	0.0081	0.0747186	0.0904721				16	0.42214	0.49469	0.5534
																																		17	0.206347	0.0874525	0.0081	0.0747186	0.0904721				17	0.51874	0.54108	0.54255
					Statistics - only P1 period																													18	0.122278	0.0687936	0.0081	0.0747186	0.0904721				18	0.43832	0.46393	0.58055
																																		19	0.092304	0.0571837	0.0081	0.0747186	0.0904721				19	0.41127	0.54923	0.66381
					Normality Test:	Failed	(P < 0.050)																											20	0.0573999	0.0286182	0.0081	0.0747186	0.0904721				20	0.426	0.50016	0.60021
																																		21	0.0394702	0.02219	0.0081	0.0747186	0.0904721				21	0.42526	0.47505	0.56779
																																		22	0.0385247	0.0228808	0.0081	0.0747186	0.0904721				22	0.44029	0.49818	0.53317
					Test execution ended by user request, Rank Sum Test begun																													23	0.0370627	0.0456643	0.0081	0.0747186	0.0904721				23	0.44858	0.47029	0.51733
																																		24	0.0385266	0.0838361	0.0081	0.0747186	0.0904721				24	0.43471	0.56402	0.56044
					Mann-Whitney Rank Sum Test	Thursday, November 24, 2022, 9:48:02 AM																												25	0.0414017	0.96487	0.0081	0.0747186	0.0904721				25	0.4821	0.48545	0.58916
																																		26	0.62077	0.97539	0.0081	0.94773	0.0904721				26	0.48311	0.49557	0.57129
					Data source: Data 1 in DIA - only P1 period																													27	0.57889	0.91105	0.24711	1.00196	0.0904721				27	0.44102	0.47241	0.53728
																																		28	0.66829	1.01544	0.2689	0.98001	0.0904721				28	0.37473	0.47857	0.60767
					Group	N	Missing	Median	0.25	0.75																								29	0.89321	0.86648	0.3483	1.0161	0.55002				29	0.43635	0.42463	0.55584
					mix GtAR2+cre	5	0	24.813	23.646	32.815																								30	0.97549	0.9929	0.3345	0.9821	0.60394				30	0.4531	0.47988	0.58058
					control	3	0	99.406	97.375	103.149																								31	1.55857	1.00477	0.34777	0.90917	0.67759				31	0.42968	0.61588	0.60473
																																		32	1.5953	0.97358	0.34177	0.8936	0.78289				32	0.39567	0.47791	0.59504
					Mann-Whitney U Statistic= 0.000																													33	1.27896	1.00177	0.42055	0.98913	0.63773				33	0.38301	0.45017	0.53539
																																		34	1.01571	1.00013	0.32939	1.18292	0.8598				34	0.39716	0.48049	0.53049
					T = 21.000 n(small)= 3 n(big)= 5 P(est.)= 0.037 P(exact)= 0.036																													35	0.97019	1.07129	0.32884	2.08399	0.89925				35	0.4265	0.47497	0.55034
																																		36	1.08824	1.03029	0.36556	0.93918	0.7992				36	0.43766	0.48927	0.57263
																																		37	0.95521	1.2525	0.39055	0.77558	0.83075				37	0.38522	0.46647	0.54949
																																		38	0.97994	0.97379	0.36529	0.82822	0.77164				38	0.45627	0.47103	0.57154
																																		39	1.06989	1.06951	0.4127	0.87852	0.82419				39	0.42339	0.51188	0.57905
																																		40	1.03467	1.13076	0.42949	0.89132	0.79871				40	0.40113	0.53679	0.56673
																																		41	1.16885	1.23421	0.43868	0.97778	0.7115				41	0.39809	0.48509	0.54492
																																		42	1.06154	1.03408	0.39524	1.11883	0.83392				42	0.37703	0.46386	0.56561
																																		43	1.15241	1.15081	0.4184	0.87339	0.94756				43	0.41858	0.55992	0.57415
																																		44	1.10471	1.16875	0.41956	0.95806	0.8434				44	0.37075	0.47607	0.57312
																																		45	1.07806	2.46029	0.39266	0.90156	0.81778				45	0.39275	0.54563	0.56617
																																		46	0.97341	1.91267	0.46985	0.86943	0.80409				46	0.44791	0.48724	0.54966
																																		47	2.03414	1.11617	0.44487	0.91865	0.98356				47	0.43173	0.48526	0.54011
																																		48	2.3891	1.22265	0.44472	1.03932	2.15601				48	0.39724	0.47402	0.53292
																																		49	1.42642	1.34156	0.46489	0.86193	1.31983				49	0.41367	0.5241	0.54933
																																		50	1.59758	1.39136	0.44614	0.87441	1.0948				50	0.40533	0.50292	0.5807
																																		51	1.5137	1.27165	0.42783	0.84852	1.09004				51	0.41069	0.48207	0.52563
																																		52	1.39049	1.26433	0.40599	0.94623	1.12917				52	0.47641	0.4563	0.50957
																																		53	1.44316	1.14801	0.38437	2.41873	1.09726				53	0.47422	0.47349	0.53491
																																		54	1.54512	1.43132	0.4211	0.79088	1.1729				54	0.43921	0.49681	0.55779
																																		55	1.4153	1.24475	0.44863	1.04819	1.04724				55	0.4249	0.42598	0.5477
																																		56	1.39265	1.10696	0.43587	1.04814	1.11242				56	0.39814	0.48351	0.474
																																		57	1.39737	1.17351	0.47215	1.1078	1.16102				57	0.37187	0.43987	0.50532
																																		58	1.51259	1.32219	0.45259	1.05715	1.03053				58	0.39287	0.48817	0.529
																																		59	1.40425	1.20522	0.43749	1.11212	1.12885				59	0.43767	0.50482	0.53772
																																		60	1.52605	1.31227	0.40946	1.00772	1.10219				60	0.44957	0.49566	0.54464
																																		61	1.38166		1.33937	0.97666	1.0679				61	0.42313		0.6557
																																		62			0.62926	1.07542	1.118				62	0.54254
																																		63			0.46816	0.90136	1.16949
																																		64			0.44435	1.05886
																																		65			0.44508	0.97809
																																		66			0.48285
																																		67			0.50124
																																		68			0.42563
																																		69			0.46531
																																		70			0.45433
																																		71			0.43428
																																		72			0.46528
																																		73			0.43764
																																		74			0.4706
																																		75			0.43282

## Sheet: HR - mix vs control
Two Way Analysis of Variance SigmaPlot v11					Analysis Summary				Mann-Whitney Analysis												DATA mix Dio-GtACR2+cre								DATA control					HR GtACr2-GFP						HR GtACr2-GFP
										Below threshold?	P value	Mean rank of GtACR2	Mean rank of control	Mean rank diff.	Mann-Whitney U	Adjusted P Value					HR									HR
Two Way Analysis of Variance					Table Analyzed	HR			off	No	>0.999999	4.5	4.5	0	7.5	>0.999999					time	20210715A	20210715C	20210715D	20210713A	20210713B			time	20210917B	20210917C	20210917D		rats	basal	P1	P2	recovery		rats	basal	P1	P2	recovery
									P1	No	0.25	5.4	3	2.4	3	>0.999999					0	177.986	213.998	177.673	257.498	216.137			0	186.477	176.233	214.737		20210715A	190.137	178.977	182.952	174.922		20210715A	100	94.1306	96.2211	91.9978
Data source: Data 1 in HR - normality test					Column A	50 HZ mix			P2	No	0.25	5.4	3	2.4	3	>0.999999					1	193.407	213.786	179.357	258.157	210.111			1	186.447	187.237	215.591		20210715C	215.092	218.464	208.627	196.668		20210715C	100	101.568	96.9942	91.4346
					vs.	vs.			off 2	No	0.571429	4	5.333	-1.333	5	>0.999999					2	187.811	208.403	179.016	257.744	226.522			2	182.048	174.067	213.709		20210715D	182.417	208.009	167.044	153.367		20210715D	100	114.029	91.5727	84.0751
General Linear Model					Column B	control															3	195.592	214.88	190.833	261.066	217.494			3	188.213	175.948	214.623		20210713A	255.663	277.113	247.588	252.137		20210713A	100	108.39	96.8412	98.6205
																					4	210.307	203.504	184.922	257.121	236.448			4	188.251	200.813	213.718		20210713B	242.086	271.642	238.315	269.048		20210713B	100	112.209	98.4425	111.137
Dependent Variable: data					Test details																5	184.561	229.934	181.308	255.563	237.325			5	186.124	167.663	210.168
					Test name	Mann-Whitney test															6	191.495	224.466	179.652	256.02	237.62			6	184.721	187.717	214.05
Normality Test:	Failed	(P < 0.050)			Comparison for each test	Compare ranks															7	191.192	211.12	178.962	257.093	241.985			7	185.666	204.664	216.127
					Multiple comparisons	Set P value threshold															8	188.161	219.189	181.553	255.142	243.226			8	184.74	188.569	213.775		HR control						HR control
Equal Variance Test:	Passed	(P = 0.232)			Method	Bonferroni-Dunn method															9	186.877	205.6	182.936	255.513	245.174			9	184.356	187.187	211.712
					Alpha	0.05															10	182.187	224.137	177.021	255.182	234.626			10	183.102	191.567	213.142		rats	basal	P1	P2	recovery		rats	basal	P1	P2	recovery
																					11	191.081	211.623	183.004	256.578	244.161			11	185.235	181.807	212.721		20210917B	184.909	186.962	177.652	174.403		20210917B	100	101.11	96.0752	94.3182
					Number of tests performed	4															12	170.394	235.765	182.629	255.507	247.218			12	181.72	186.798	211.847		20210917C	187.001	188.61	173.972	185.277		20210917C	100	100.861	93.0326	99.078
					Number of rows omitted	0															13	193.357	222.768	180.64	254.994	235.413			13	185.478	195.138	212.919		20210917D	212.753	210.858	199.138	200.401		20210917D	100	99.1096	93.6009	94.1943
																					14	196.302	211.246	179.686	256.398	237.924			14	188.226	182.725	211.732
																					15	189.53	222.687	178.634	257.732	240.243			15	188.679	182.081	214.018
																					16	187.982	211.096	179.418	256.317	259.049			16	183.912	215.385	214.138
																					17	187.82	213.823	186.103	277.112	272.074			17	185.886	204.918	214.705
					Statistics - only P1 period																18	187.776	216.362	189.57	277.707	273.611			18	188.331	184.108	214.7
																					19	179.772	218.399	203.473	275.066	273.613			19	184.513	186.323	211.198
																					20	180.669	220.741	201.488	273.335	271.986			20	187.359	179.638	207.564
																					21	179.198	218.507	217.712	268.671	270.363			21	187.736	173.341	207.518
					Normality Test:	Passed	(P = 0.690)														22	177.771	218.971	200.84	262.394	273.215			22	186.461	179.824	209.053
																					23	183.228	213.581	215.468	255.825	269.477			23	186.916	163.413	205.536
					Equal Variance Test:	Passed	(P = 0.128)														24	181.135	209.44	218.173	249.021	268.437			24	183.108	168.423	201.544
																					25	184.502	211.874	220.22	248.612	262.355			25	180.637	192.796	199.798
					Group Name	N	Missing	Mean	Std Dev	SEM											26	179.797	213.932	218.966	251.807	257.995			26	178.838	166.843	202.289
					mix GtAR2+cre	5	0	106.065	8.204	3.669											27	179.155	216.796	213.382	248.695	248.312			27	180.251	221.839	203.318
					control	3	0	100.36	1.09	0.629											28	175.262	204.688	204.758	247.001	215.185			28	176.217	179.232	201.712
																					29	176.622	213.325	191.619	248.214	206.882			29	175.702	208.294	200.199
					Difference	5.705															30	182.757	197.151	157.191	246.944	221.934			30	179.37	168.959	202.278
																					31	183.405	195.879	170.156	249.731	212.779			31	177.79	171.296	200.663
					t = 1.161 with 6 degrees of freedom. (P = 0.290)																32	107.617	194.357	167.285	248.002	267.206			32	179.595	170.719	198.685
																					33	168.783	189.175	153.575	247.702	260.422			33	180.21	164.871	194.843
					95 percent confidence interval for difference of means: -6.318 to 17.728																34	164.947	187.628	150.873	246.516	263.204			34	178.472	202.736	197.033
																					35	169.609	187.499	146.331	238.833	254.938			35	177.165	178.641	201.11
																					36	163.693	184.808	145.496	233.202	246.999			36	175.66	173.176	200.631
																					37	178.024	186.611	141.717	231.303	206.351			37	173.731	157.16	197.517
																					38	176.668	186.517	139.431	226.33	229.386			38	171.029	168.272	196.648
																					39	175.112	185.61	143.346	232.533	249.351			39	172.373	166.768	197.867
																					40	181.767	185.03	141.699	241.342	249.771			40	172.345	187.493	199.183
																					41	171.625	181.683	147.072	245.601	247.728			41	172.022	188.314	198.851
																					42	166.62	183.11	152.656	245.809	247.727			42	170.626	161.769	194.509
																					43	177.098	186.195	157.188	244.962	239.528			43	172.958	187.341	192.568
																					44	172.567	189.276	152.813	250.578	246.187			44	172.347	164.274	197.891
																					45	187.947	185.421	151.478	245.447	235.34			45	172.622	180.971	199.128
																					46	180.46	159.857	152.261	248.443	241.024			46	173.723	171.542	192.561
																					47	177.14	144.59	155.783	243.095	256.911			47	176.81	185.81	188.706
																					48	163.363	162.977	150.444	244.494	247.798			48	174.384	173.822	193.654
																					49	150.371	183.052	150.914	245.075	145.544			49	174.957	187.355	196.125
																					50	155.22	188.532	156.534	242.192	197.479			50	169.778	176.358	196.879
																					51	152.356	194.465	153.633	246.389	263.287			51	176.067	174.415	196.825
																					52	167.16	188.589	145.815	244.321	274.977			52	171.62	195.471	197.703
																					53	179.206	193.939	148.408	242.852	271.638			53	171.514	173.493	201.96
																					54	163.66	204.229	147.514	232.83	269.217			54	173.952	186.941	199.91
																					55	181.48	187.416	157.101	231.492	268.767			55	175.824	189.228	202.832
																					56	177.535	197.271	156.722	240.298	253.411			56	176.037	187.424	198.392
																					57	180.716	201.636	156.78	248.838	252.931			57	174.228	202.085	200.414
																					58	171.202	195.356	156.154	250.443	215.341			58	176.806	190.846	199.216
																					59	177.588	207.64	153.912	253.027	249.293			59	170.71	188.209	201.831
																					60	181.153	195.701	154.892	251.688	249.368			60	172.806	201.448	201.651
																					61	168.995		156.209	251.617	248.315			61	171.551		201.474
																					62			96.6854	250.222	245.515			62	178.865
																					63			128.781	253.573	241.724
																					64			132.421	252.054
																					65			141.367	251.071
																					66			151.614
																					67			151.049
																					68			150.342
																					69			153.364
																					70			152.304
																					71			150.129
																					72			151.67
																					73			154.579
																					74			152.923
																					75			148.339

## Sheet: MP Activity (AUC) mix vs contro
Two Way Analysis of Variance SigmaPlot v11					Analysis Summary				Mann-Whitney Analysis											DATA mix Dio-GtACR2+cre								DATA control
										Below threshold?	P value	Mean rank of preotC to 7n	Mean rank of control	Mean rank diff.	Mann-Whitney U	Adjusted P Value				AUC MP								AUC MP
Two Way Analysis of Variance					Table Analyzed	MP activity			off	No	>0.999999	4.5	4.5	0	7.5	>0.999999				rats	off	P1	P2	off				rats	off	P1	P2	off
									P1	No	0.142857	5.6	2.667	2.933	2	0.571429				20210715A	0.0581943	0.0578891	0.0464738	0.0415059				20210917B	0.0626461	0.0605991	0.0611344	0.0626977
Data source: Data 1 in Notebook2					Column A	50 HZ mix			P2	No	0.25	5.4	3	2.4	3	>0.999999				20210715C	0.0504	0.0501582	0.0622508	0.0400259				20210917C	0.0446777	0.0447356	0.0402258	0.0468714
					vs.	vs.			off	No	0.25	3.6	6	-2.4	3	>0.999999				20210715D	0.0516209	0.052944	0.0560473	0.0675237				20210917D	0.0701574	0.0692036	0.0709161	0.0701628
General Linear Model					Column B	control														20210713A	0.0436217	0.0477927	0.0593075	0.036323
																				20210713B	0.0439282	0.0514587	0.053676	0.0376681
Dependent Variable: data					Test details
					Test name	Mann-Whitney test
Normality Test:	Failed	(P < 0.050)			Comparison for each test	Compare ranks
					Multiple comparisons	Set P value threshold
Equal Variance Test:	Passed	(P = 0.617)			Method	Bonferroni-Dunn method
					Alpha	0.05
																				DATA mix Dio-GtACR2+cre								DATA control
					Number of tests performed	4														AUC MP								AUC MP
					Number of rows omitted	0														rats	off	P1	P2	off				rats	off	P1	P2	off
																				20210715A	100	99.4756	79.8598	71.3229				20210917B	100	96.7324	97.5869	100.082
																				20210715C	100	99.5202	123.513	79.4164				20210917C	100	100.13	90.0357	104.91
																				20210715D	100	102.563	108.575	130.807				20210917D	100	98.6405	101.081	100.008
																				20210713A	100	109.562	135.959	83.2683
																				20210713B	100	117.143	122.19	85.7492
					Statistics - only P1 period
					Normality Test:	Passed	(P = 0.420)
					Equal Variance Test:	Passed	(P = 0.269)
					Group Name	N	Missing	Mean	Std Dev	SEM
					mix GtAR2+cre	5	0	105.653	7.626	3.41
					control	3	0	98.501	1.703	0.983
					Difference	7.152
					t = 1.554 with 6 degrees of freedom. (P = 0.171)
					95 percent confidence interval for difference of means: -4.113 to 18.416

## Sheet: apnea duration
DATA GtACr2-GFP					DATA control				apnea duration				missed resp cycles
	apnea duration	1 resp cycle	missed res cycles		rats	apnea duration	missed res cycles		Column B	control			Column B	control
20210715A	10.4475	1.06906	9.7726		20210917B	0	0		vs.	vs.			vs.	vs.
20210715C	9.23367	0.944236	9.77899		20210917C	0	0		Column A	GtACR2+CRE			Column A	GtACR2+CRE
20210715D	9.42455	0.984544	9.5725		20210917D	0	0
20210713A	9.62746	0.8028	11.9924						Unpaired t test				Unpaired t test
20210713B	12.6485	0.80756	15.6626						P value	<0.0001			P value	0.0003
									P value summary	****			P value summary	***
									Significantly different (P < 0.05)?	Yes			Significantly different (P < 0.05)?	Yes
average	10.2763		11.3558						One- or two-tailed P value?	Two-tailed			One- or two-tailed P value?	Two-tailed
SD	1.40448		2.60418						t, df	t=12.27, df=6			t, df	t=7.313, df=6
confidence 95%	1.744		3.2338
bottom limit	8.532		8.122						How big is the difference?				How big is the difference?
upper limit	12.02		14.59						Mean of column A	10.28			Mean of column A	11.36
n	5		5						Mean of column B	0			Mean of column B	0
									Difference between means (B - A) ± SEM	-10.28 ± 0.8375			Difference between means (B - A) ± SEM	-11.36 ± 1.553
									95% confidence interval	-12.33 to -8.227			95% confidence interval	-15.16 to -7.556
									R squared (eta squared)	0.9617			R squared (eta squared)	0.8991
									Data analyzed				Data analyzed
									Sample size, column A	5			Sample size, column A	5
									Sample size, column B	3			Sample size, column B	3

## Sheet: fR preBotC to 7n
Two Way Analysis of Variance SigmaPlot v11						Analysis Summary				Mann-Whitney Analysis											DATA preBotC to 7n									DATA control							fR preBotC--7n						fR preBotC--7n
																					fR									fR
Two Way Analysis of Variance						Table Analyzed	fR				Below threshold?	P value	Mean rank of preBotC to 7n	Mean rank of control	Mean rank diff.	Mann-Whitney U	Adjusted P Value				time	20210716A	20210716B	20210716C	20210714A	20210714B				time	20210917B	20210917C	20210917D				rats	basal	P1	P2	recovery		rats	basal	P1	P2	recovery
										off	No	>0.999999	4.5	4.5	0	7.5	>0.999999				0	67.9757	59.8239	71.2469	57.9599	60.5976				time	20210917B	20210917C	20210917D				20210716A	69.841	68.3782	77.7862	67.1187		20210716A	100	97.9057	111.376	96.1022
Data source: Data 1 in fR - normality test						Column A	preBotC to 7n			p1	No	0.392857	3.8	5.667	-1.867	4	>0.999999				1	67.5436	59.7264	71.4682	64.2293	56.2976				0	55.2419	82.427	47.3247				20210716B	58.5978	0	100.422	55.2946		20210716B	100	0	171.376	94.3629
						vs.	vs.			p2	No	0.035714	6	2	4	0	0.142857				2	71.0511	56.8129	72.8645	57.31	49.7558				1	57.4308	85.5948	49.3567				20210716C	71.9159	77.409	82.3216	70.188		20210716C	100	107.638	114.469	97.5974
General Linear Model						Column B	control			off 2	No	0.25	3.6	6	-2.4	3	>0.999999				3	70.9932	57.8712	68.9828	57.527	47.1895				2	57.6974	84.4639	48.2836				20210914A	58.1389	45.5126	59.8506	61.3172		20210914A	100	78.2826	102.944	105.467
																					4	68.5988	59.196	65.0622	60.0238	47.119				3	50.6646	77.2191	47.6278				20210914B	59.8252	42.047	59.9393	58.418		20210914B	100	70.2831	100.191	97.6478
Dependent Variable: data						Test details															5	67.6088	58.4232	70.3093	55.7295	48.3384				4	51.454	86.1028	48.843
						Test name	Mann-Whitney test														6	67.1098	56.6767	73.2232	60.8645	49.5851				5	55.8874	84.4712	48.1874
Normality Test:	Failed	(P < 0.050)				Comparison for each test	Compare ranks														7	70.8019	56.7103	71.5889	61.8827	51.5265				6	57.5206	76.9713	46.4288
						Multiple comparisons	Set P value threshold														8	71.789	59.1567	68.6598	59.5643	50.6862				7	67.2218	83.4365	46.2021				fR control						fR control
Equal Variance Test:	Passed	(P = 0.265)				Method	Bonferroni-Dunn method														9	67.9239	57.2323	69.1904	56.0741	49.9631				8	54.4462	80.4838	48.45
						Alpha	0.05														10	74.4575	55.9893	74.3295	60.1542	53.0988				9	53.8743	75.8951	50.9461				rats	basal	P1	P2	recovery		rats	basal	P1	P2	recovery
																					11	69.4331	61.5521	71.2725	57.7603	58.847				10	58.5906	81.6532	44.4834				20210917B	54.3249	54.9117	53.4067	56.7601		20210917B	100	101.08	98.3098	104.483
						Number of tests performed	4														12	70.9172	57.73	67.2823	54.4029	56.0105				11	54.1844	80.1795	46.0169				20210917C	81.3121	79.4351	80.9106	83.9499		20210917C	100	97.6916	99.5063	103.244
						Number of rows omitted	0														13	69.7042	59.2327	73.9333	58.0206	47.6719				12	51.5882	77.6601	46.9841				20210917D	47.7953	48.09	46.3961	47.3588		20210917D	100	100.617	97.0725	99.0869
																					14	67.7809	59.9136	70.1228	57.1581	65.2319				13	59.3665	77.7581	47.6841
																					15	70.7828	56.0899	65.983	62.6833	64.874				14	58.2142	84.9745	50.6396
																					16	63.2885	0	94.7811	48.3109	44.9794				15	49.8455	72.2126	46.9898
																					17	65.604	0	73.6098	38.3598	41.5699				16	52.7139	80.0148	46.6353
																					18	65.3218	0	82.8723	39.7838	41.1232				17	55.5401	78.3275	47.3141
																					19	68.7355	0	73.2784	43.2428	42.7125				18	55.1419	90.6199	48.4342
																					20	72.2885	47.8892	75.7553	43.7937	40.3433				19	55.9209	67.7563	49.8275
						Statistics - only P1 period															21	85.724	78.9291	81.4479	41.8996	39.7289				20	54.5268	82.4546	49.0473
																					22	72.8704	86.9466	88.0095	49.0357	40.9393				21	53.7371	85.9059	50.3846
																					23	75.7487	90.2089	79.7091	50.7669	45.9886				22	53.9044	86.9506	46.9836
						Normality Test:	Failed	(P < 0.050)													24	80.2813	94.705	83.2393	52.8136	67.6729				23	55.2793	82.796	43.5924
																					25	74.8077	113.229	70.8085	54.1735	65.0719				24	58.6838	77.1151	46.6234
																					26	80.1255	101.828	88.8629	56.7082	53.5853				25	58.023	79.0837	42.7599
						Test execution ended by user request, Rank Sum Test begun															27	78.155	101.806	81.7809	58.7929	61.1658				26	51.8342	87.1077	42.7143
																					28	79.5482	104.397	82.6877	60.2294	60.8618				27	53.2525	88.6672	45.8672
						Mann-Whitney Rank Sum Test	Thursday, November 24, 2022, 9:53:46 AM														29	76.2691	96.2643	90.6931	63.6994	57.8206				28	56.5349	85.4753	47.4903
																					30	76.8655	109.106	78.6218	63.9968	61.7734				29	52.0285	84.1441	51.5251
						Data source: Data 1 in MP - only P1 period															31	74.1328	106.192	84.2784	63.2506	65.301				30	49.6849	90.5183	47.241
																					32	72.5879	97.5295	79.5804	65.0737	65.717				31	51.911	87.1893	43.6636
						Group	N	Missing	Median	0.25	0.75										33	75.8771	93.8777	80.9836	66.8003	61.755				32	57.4199	87.8618	44.1768
						preBotC to 7n	5	0	78.283	52.712	100.339										34	77.4474	70.5479	82.841	65.1612	62.3231				33	60.597	83.8467	45.9158
						control	3	0	100.617	98.423	100.964										35	76.457	51.159	83.1202	67.2295	62.8209				34	56.5524	86.318	46.561
																					36	71.6389	32.4463	84.9938	68.2161	60.6216				35	51.3891	88.7245	45.7785
						Mann-Whitney U Statistic= 4.000															37	74.775	100.66	79.0183	66.5822	54.1018				36	52.6421	88.2264	44.3956
																					38	72.3436	90.0894	86.0213	63.1692	64.5168				37	57.0712	91.7964	47.6351
						T = 17.000 n(small)= 3 n(big)= 5 P(est.)= 0.371 P(exact)= 0.393															39	74.1012	96.8456	86.9883	66.0847	61.2868				38	60.3939	83.4341	47.0841
																					40	76.4309	90.8654	78.4155	65.8397	70.9782				39	54.7545	83.5095	46.7486
																					41	71.8243	99.4168	82.1539	63.6284	70.1475				40	60.5452	80.0292	46.0769
																					42	75.6947	92.4489	77.0919	61.1719	62.5858				41	55.7047	84.2091	43.2386
																					43	76.1213	95.1301	86.3898	63.0397	62.6449				42	60.2093	88.3482	48.4014
																					44	73.6551	100.737	84.5435	65.5817	60.207				43	56.6229	87.9081	49.4315
																					45	71.2319	108.364	80.5778	62.8811	61.9674				44	52.6094	88.2611	48.7149
																					46	72.4497	97.3205	81.6938	62.2005	57.9961				45	57.1013	88.0865	48.5443
																					47	74.0387	91.3603	89.6048	63.8313	55.7103				46	54.0726	88.3653	48.9536
																					48	72.3896	100.179	90.7364	60.9126	63.2309				47	51.3413	90.0411	48.0944
																					49	67.7262	91.1902	83.1409	57.6735	64.6703				48	52.5196	88.5804	46.2919
																					50	68.5837	85.3991	77.0731	61.9177	78.2862				49	57.1098	85.1799	45.6562
																					51	68.882	71.7494	89.7921	58.6972	60.7631				50	61.7822	89.0694	46.8037
																					52	67.0977	72.0388	83.1048	59.6258	66.4337				51	55.232	76.6485	47.1737
																					53	68.1129	74.2885	75.9181	59.6128	63.7881				52	44.6331	82.6262	50.5378
																					54	67.4168	75.867	86.385	61.035	55.5158				53	55.1748	87.4971	48.875
																					55	66.8841	70.774	80.4885	59.4452	53.2752				54	55.0647	75.2505	46.6844
																					56	67.3869	68.3824	77.2792	60.5918	55.744				55	55.1674	83.1918	46.6635
																					57	71.8323	65.768	72.7028	60.8761	66.5755				56	55.9747	75.4541	46.6858
																					58	67.1006	70.8918	79.8011	62.9316	54.6095				57	57.0362	83.9845	48.1832
																					59	65.6003	67.0113	71.6576	62.6851	43.9505				58	57.5476	85.5933	47.1989
																					60	68.7638	68.0024	84.1348		36.6622				59	53.8956	73.0562	46.3152
																					61	65.9349	65.9776	70.0508		71.5124				60	51.1539	72.853	48.6839
																					62	67.4081	62.9295	70.1383		60.2465				61	55.0384		44.2482
																					63	67.2913	61.4502	71.7252		67.7125				62	54.56
																					64		65.3162	70.6133
																					65			75.9908
																					66			72.9319
																					67			79.0471
																					68			70.1049
																					69			72.4509
																					70			69.0248

## Sheet: DIA activity- preBotC to 7n
Two Way Analysis of Variance SigmaPlot v11					Analysis Summary				Mann-Whitney Analysis											DATA preBotC to 7n									DATA control							DATA preBotC to 7n									DATA control
										Below threshold?	P value	Mean rank of GtACR2	Mean rank of control	Mean rank diff.	Mann-Whitney U	Adjusted P Value				AUC DIA									AUC DIA							DIA amplitude									DIA amplitude
Two Way Analysis of Variance					Table Analyzed	DIA data			off	No	>0.999999	4.5	4.5	0	7.5	>0.999999				rats	off	P1	P2	off					rats	off	P1	P2	off			time	20210716A	20210716B	20210716C	20210714A	20210714B				time	20210917B	20210917C	20210917D
									p1	No	0.035714	3	7	-4	0	0.142857				20210716A	0.0662763	0.0516696	0.067848	0.0673605					20210917B	0.106189	0.105559	0.107284	0.104577			0	0.54237	0.76224	0.97691	1.1067	0.72003				0	0.42324	0.46856	0.47523
Data source: Data 1 in MP activity- sigma					Column A	preBotC to 7n			p2	No	0.785714	4.8	4	0.8	6	>0.999999				20210716B	0.0840163	0.0111678	0.0514087	0.0819189					20210917C	0.123998	0.12945	0.122728	0.137512			1	0.51898	0.7468	0.99827	1.09418	0.70618				1	0.39612	0.44945	0.56367
					vs.	vs.			off 2	No	0.785714	4.8	4	0.8	6	>0.999999				20210716C	0.114011	0.0960868	0.111429	0.118427					20210917D	0.089928	0.0869585	0.0882375	0.0861823			2	0.49559	0.78144	1.0028	1.01872	0.73409				2	0.45478	0.51507	0.56622
General Linear Model					Column B	control														20210714A	0.148292	0.100778	0.155004	0.149935												3	0.52282	0.78169	1.08488	1.017	0.73133				3	0.41967	0.43013	0.54538
																				20210714B	0.0920266	0.065643	0.0964694	0.090779												4	0.51705	0.71081	1.05054	1.09754	0.73238				4	0.43443	0.47293	0.55775
Dependent Variable: data					Test details																															5	0.52424	0.65954	1.06879	1.07359	0.74383				5	0.4493	0.47461	0.61395
					Test name	Mann-Whitney test																														6	0.55671	0.6641	0.96821	1.15317	0.719				6	0.4418	0.4615	0.59784
Normality Test:	Failed	(P < 0.050)			Comparison for each test	Compare ranks																														7	0.55204	0.69199	0.98433	1.08172	0.68754				7	0.35771	0.46459	0.56498
					Multiple comparisons	Set P value threshold																														8	0.57736	0.70359	0.89782	1.04015	0.70901				8	0.46524	0.51486	0.55137
Equal Variance Test:	Passed	(P = 0.633)			Method	Bonferroni-Dunn method														DATA preBotC to 7n									DATA control							9	0.49945	0.70463	0.99438	1.0154	0.72934				9	0.46025	0.48223	0.58237
					Alpha	0.05														AUC DIA									AUC DIA							10	0.53382	0.70895	0.97135	1.00683	0.70319				10	0.41861	0.45394	0.60976
																				rats	off	P1	P2	off					rats	off	P1	P2	off			11	0.52954	0.72548	0.96417	1.10827	0.667				11	0.42371	0.4495	0.56868
					Number of tests performed	4														20210716A	100	77.961	102.372	101.636					20210917B	100	99.4062	101.031	98.4818			12	0.54223	0.75185	1.05681	1.05888	0.70047				12	0.42883	0.54305	0.52408
					Number of rows omitted	0														20210716B	100	13.2924	61.1889	97.5035					20210917C	100	104.397	98.9758	110.899			13	0.56397	0.76374	1.01276	1.11577	0.72819				13	0.44971	0.46587	0.5088
																				20210716C	100	84.2788	97.7352	103.873					20210917D	100	96.6979	98.1202	95.8348			14	0.58152	0.80346	0.98965	1.07306	0.65968				14	0.47381	0.40418	0.54843
																				20210714A	100	67.9596	104.527	101.109												15	0.52886	0.69627	0.93535	1.13623	0.61239				15	0.45133	0.46676	0.58048
																				20210714B	100	71.3305	104.828	98.6443												16	0.33394	0.017	0.69895	1.05456	0.52975				16	0.42214	0.49469	0.5534
																																				17	0.34074	0.017	0.61516	0.98073	0.62381				17	0.51874	0.54108	0.54255
																																				18	0.39549	0.017	0.72246	0.94475	0.69808				18	0.43832	0.46393	0.58055
					Statistics - only P1 period																															19	0.44854	0.017	0.79211	1.04097	0.72923				19	0.41127	0.54923	0.66381
																																				20	0.48639	0.34123	0.87445	1.06255	0.7002				20	0.426	0.50016	0.60021
					Normality Test:	Failed	(P < 0.050)																													21	0.42988	0.46072	0.92342	1.0012	0.71587				21	0.42526	0.47505	0.56779
																																				22	0.51763	0.43924	0.97607	1.08198	0.76955				22	0.44029	0.49818	0.53317
																																				23	0.50986	0.57195	0.96151	1.04557	0.72017				23	0.44858	0.47029	0.51733
					Test execution ended by user request, Rank Sum Test begun																															24	0.51615	0.60799	0.9607	1.11786	0.57387				24	0.43471	0.56402	0.56044
																																				25	0.5394	0.67562	1.03573	1.1619	0.77607				25	0.4821	0.48545	0.58916
					Mann-Whitney Rank Sum Test	Thursday, November 24, 2022, 9:54:55 AM																														26	0.53015	0.6897	1.04923	1.14793	0.73436				26	0.48311	0.49557	0.57129
																																				27	0.50679	0.67164	0.98254	1.13949	0.65449				27	0.44102	0.47241	0.53728
					Data source: Data 1 in fR - only P1 period																															28	0.52282	0.67369	0.98551	1.09213	0.77318				28	0.37473	0.47857	0.60767
																																				29	0.48718	0.6442	1.02143	1.0432	0.7034				29	0.43635	0.42463	0.55584
					Group	N	Missing	Median	0.25	0.75																										30	0.51199	0.65477	0.95437	1.14394	0.69475				30	0.4531	0.47988	0.58058
					preBotC to 7n	5	0	71.331	54.293	79.54																										31	0.58087	0.69408	1.00604	1.0834	0.73123				31	0.42968	0.61588	0.60473
					control	3	0	99.406	97.375	103.149																										32	0.4892	0.60314	0.98849	1.09933	0.65511				32	0.39567	0.47791	0.59504
																																				33	0.48172	0.66122	0.91567	1.12536	0.67535				33	0.38301	0.45017	0.53539
					Mann-Whitney U Statistic= 0.000																															34	0.56225	2.14988	1.00798	1.06725	0.74061				34	0.39716	0.48049	0.53049
																																				35	0.54045	1.44042	1.01541	0.94088	0.62095				35	0.4265	0.47497	0.55034
					T = 21.000 n(small)= 3 n(big)= 5 P(est.)= 0.037 P(exact)= 0.036																															36	0.58325	0.54414	1.03887	1.07858	0.69842				36	0.43766	0.48927	0.57263
																																				37	0.5109	0.50273	0.96001	1.04922	0.65625				37	0.38522	0.46647	0.54949
																																				38	0.54059	0.61421	0.93584	0.96309	0.69201				38	0.45627	0.47103	0.57154
																																				39	0.52114	0.51629	0.87989	1.08319	0.72714				39	0.42339	0.51188	0.57905
																																				40	0.47447	0.5794	1.11067	1.12993	0.63648				40	0.40113	0.53679	0.56673
																																				41	0.5247	0.57306	1.00647	1.11574	0.69749				41	0.39809	0.48509	0.54492
																																				42	0.55144	0.52257	1.04103	1.03988	0.65394				42	0.37703	0.46386	0.56561
																																				43	0.49603	0.57322	0.93166	1.02112	0.66637				43	0.41858	0.55992	0.57415
																																				44	0.59844	0.6114	0.94625	1.11576	0.67958				44	0.37075	0.47607	0.57312
																																				45	0.56007	0.64037	0.98654	1.00936	0.70512				45	0.39275	0.54563	0.56617
																																				46	0.5389	0.60638	0.87868	1.03095	0.72531				46	0.44791	0.48724	0.54966
																																				47	0.58285	0.6172	0.93863	1.13677	0.70963				47	0.43173	0.48526	0.54011
																																				48	0.5405	0.64373	0.95674	1.11863	0.71588				48	0.39724	0.47402	0.53292
																																				49	0.56889	0.66692	0.99843	1.00858	0.63167				49	0.41367	0.5241	0.54933
																																				50	0.55264	0.74914	0.99489	1.06948	0.80803				50	0.40533	0.50292	0.5807
																																				51	0.58401	0.71856	1.10094	1.13163	0.74405				51	0.41069	0.48207	0.52563
																																				52	0.55479	0.81444	1.13106	1.03672	0.73124				52	0.47641	0.4563	0.50957
																																				53	0.53815	0.76608	1.05858	1.02006	0.69585				53	0.47422	0.47349	0.53491
																																				54	0.54462	0.71859	0.94434	1.11694	0.77694				54	0.43921	0.49681	0.55779
																																				55	0.54444	0.71172	1.00254	1.08761	0.67495				55	0.4249	0.42598	0.5477
																																				56	0.56685	0.67882	1.12659	1.05632	0.69112				56	0.39814	0.48351	0.474
																																				57	0.57095	0.73454	1.02821	1.09494	0.64685				57	0.37187	0.43987	0.50532
																																				58	0.55994	0.69344	1.01778	1.14523	1.33961				58	0.39287	0.48817	0.529
																																				59	0.52027	0.72429	1.0598	1.07302	1.10015				59	0.43767	0.50482	0.53772
																																				60	0.52879	0.71142	0.96057		0.2122				60	0.44957	0.49566	0.54464
																																				61	0.55676	0.75679	0.98984		0.65098				61	0.42313		0.6557
																																				62	0.55492	0.76847	1.01998		0.66946				62	0.54254
																																				63	0.52846	0.77786	0.99053		0.60269
																																				64		0.78145	1.05787
																																				65			0.95949
																																				66			0.92203
																																				67			0.88687
																																				68			0.92754
																																				69			1.07383
																																				70			1.01042

## Sheet: HR preBotC to 7n
Two Way Analysis of Variance SigmaPlot v11				Analysis Summary				Mann-Whitney Analysis											DATA preBotC to 7n								DATA control							HR preBotC--7n						HR preBotC--7n
																												HR
Two Way Analysis of Variance				Table Analyzed	HR				Below threshold?	P value	Mean rank of preBotC to 7n	Mean rank of control	Mean rank diff.	Mann-Whitney U	Adjusted P Value				time	20210716A	20210716B	20210716C	20210714A	20210714B			time	20210917B	20210917C	20210917D				rats	basal	P1	P2	recovery		rats	basal	P1	P2	recovery
								off	No	>0.999999	4.5	4.5	0	7.5	>0.999999				0	365.855	202.099	192.638	156.622	97.6293			0	186.477	176.233	214.737				20210716A	328.689	323.615	312.829	329.478		20210716A	100	98.4562	95.1749	100.24
Data source: Data 1 in HR - normality test				Column A	preBotC to 7n			p1	No	0.785714	4.2	5	-0.8	6	>0.999999				1	274.729	209.956	176.307	156.469	95.8452			1	186.447	187.237	215.591				20210716B	217.637	236.797	239.451	200.433		20210716B	100	108.804	110.023	92.095
				vs.	vs.			p2	No	0.392857	5.2	3.333	1.867	4	>0.999999				2	327.304	209.483	196.762	153.956	97.1729			2	182.048	174.067	213.709				20210716C	189.864	205.93	210.494	199.91		20210716C	100	108.462	110.866	105.291
General Linear Model				Column B	control			off 2	No	0.785714	4.2	5	-0.8	6	>0.999999				3	313.206	211.914	156.054	160.606	95.8973			3	188.213	175.948	214.623				20210914A	177.195	163.251	178.108	165.892		20210914A	100	92.1311	100.516	93.6215
																			4	269.869	222.695	202.735	178.637	97.0046			4	188.251	200.813	213.718				20210914B	112.609	99.4185	98.6127	94.5668		20210914B	100	88.2868	87.5712	83.9783
Dependent Variable: data				Test details															5	326.263	219.142	201.267	153.829	99.4075			5	186.124	167.663	210.168
				Test name	Mann-Whitney test														6	285.55	218.142	193.502	243.694	97.9034			6	184.721	187.717	214.05
Normality Test:	Failed	(P < 0.050)		Comparison for each test	Compare ranks														7	320.166	208.288	177.052	167.149	100.578			7	185.666	204.664	216.127
				Multiple comparisons	Set P value threshold														8	256.052	212.594	172.724	160.304	99.2191			8	184.74	188.569	213.775				HR control						HR control
Equal Variance Test:	Failed	(P < 0.050)		Method	Bonferroni-Dunn method														9	328.445	206.559	194.342	184.544	116.863			9	184.356	187.187	211.712
				Alpha	0.05														10	319.939	217.715	197.808	270.783	103.84			10	183.102	191.567	213.142				rats	basal	P1	P2	recovery		rats	basal	P1	P2	recovery
																			11	270.461	220.377	198.808	160.857	115.769			11	185.235	181.807	212.721				20210917B	184.909	186.962	177.652	174.403		20210917B	100	101.11	96.0752	94.3182
				Number of tests performed	4														12	330.489	218.571	190.045	172.353	138.817			12	181.72	186.798	211.847				20210917C	187.001	188.61	173.972	185.277		20210917C	100	100.861	93.0326	99.078
				Number of rows omitted	0														13	334.644	222.77	189.057	152.249	99.4204			13	185.478	195.138	212.919				20210917D	212.753	210.858	199.138	200.401		20210917D	100	99.1096	93.6009	94.1943
																			14	333.167	222.035	199.002	160.047	104.687			14	188.226	182.725	211.732
																			15	300.655	220.91	182.643	161.316	97.216			15	188.679	182.081	214.018
																			16	274.382	221.304	188.031	245.068	98.2658			16	183.912	215.385	214.138
																			17	296.449	230.207	205.147	161.251	101.496			17	185.886	204.918	214.705
																			18	353.679	235.884	208.279	165.455	98.8866			18	188.331	184.108	214.7
																			19	365.925	239.352	207.998	158.863	95.9138			19	184.513	186.323	211.198
				Statistics - only P1 period															20	333.075	239.173	213.389	151.72	96.9071			20	187.359	179.638	207.564
																			21	330.649	240.312	285.921	151.04	104.75			21	187.736	173.341	207.518
				Normality Test:	Passed	(P = 0.479)													22	338.639	241.114	216.26	138.063	96.6387			22	186.461	179.824	209.053
																			23	359.661	238.367	214.607	145.026	93.8082			23	186.916	163.413	205.536
				Equal Variance Test:	Failed	(P < 0.050)													24	333.787	238.008	213.811	134.458	96.6855			24	183.108	168.423	201.544
																			25	356.039	238.579	213.984	148.499	94.3945			25	180.637	192.796	199.798
																			26	377.608	234.639	206.942	153.267	95.8523			26	178.838	166.843	202.289
				Test execution ended by user request, Rank Sum Test begun															27	271.372	229.576	208.197	152.11	94.8395			27	180.251	221.839	203.318
																			28	325.801	226.495	196.379	136.938	100.057			28	176.217	179.232	201.712
				Mann-Whitney Rank Sum Test	Thursday, November 24, 2022, 9:56:20 AM														29	263.824	217.726	203.756	250.734	93.992			29	175.702	208.294	200.199
																			30	304.591	213.012	177.978	158.268	92.9148			30	179.37	168.959	202.278
				Data source: Data 1 in HR - only P1 period															31	296.343	204.601	201.442	141.262	96.3315			31	177.79	171.296	200.663
																			32	315.004	190.598	165.547	147.519	88.7458			32	179.595	170.719	198.685
				Group	N	Missing	Median	0.25	0.75										33	372.977	196.257	203.482	144.225	99.5935			33	180.21	164.871	194.843
				preBotC to 7n	5	0	98.456	91.17	108.548										34	275.309	202.47	190.609	150.438	89.4996			34	178.472	202.736	197.033
				control	3	0	100.861	99.547	101.048										35	328.599	178.963	169.89	168.004	100.034			35	177.165	178.641	201.11
																			36	270.779	186.697	206.378	152.624	89.7456			36	175.66	173.176	200.631
				Mann-Whitney U Statistic= 6.000															37	281.401	189.625	199.415	152.759	97.3669			37	173.731	157.16	197.517
																			38	318.381	191.14	178.424	157.041	94.7049			38	171.029	168.272	196.648
				T = 15.000 n(small)= 3 n(big)= 5 P(est.)= 0.766 P(exact)= 0.78															39	298.704	189.923	188.588	151.395	93.1804			39	172.373	166.768	197.867
																			40	365.329	189.714	155.413	134.858	96.254			40	172.345	187.493	199.183
																			41	266.297	194.516	192.215	153.491	94.8537			41	172.022	188.314	198.851
																			42	317.232	192.06	191.727	157.212	91.0604			42	170.626	161.769	194.509
																			43	275.173	194.744	190.216	145.296	96.6592			43	172.958	187.341	192.568
																			44	335.806	198.482	187.676	137.92	91.9885			44	172.347	164.274	197.891
																			45	298.235	191.738	172.625	158.943	96.2625			45	172.622	180.971	199.128
																			46	325.635	194.669	194.077	153.843	90.7058			46	173.723	171.542	192.561
																			47	308.423	195.035	184.736	154.91	93.5418			47	176.81	185.81	188.706
																			48	281.982	194.739	188.018	158.903	98.3359			48	174.384	173.822	193.654
																			49	364.15	196.02	204.774	158.836	92.0574			49	174.957	187.355	196.125
																			50	311.159	198.78	193.77	148.9	102.058			50	169.778	176.358	196.879
																			51	312.236	196.458	192.688	168.572	91.7488			51	176.067	174.415	196.825
																			52	368.126	198.554	193.016	158.777	96.6441			52	171.62	195.471	197.703
																			53	269.964	196.561	194.575	168.69	94.9938			53	171.514	173.493	201.96
																			54	280.908	194.468	199.469	163.702	96.3727			54	173.952	186.941	199.91
																			55	322.435	190.907	188.991	165.759	134.528			55	175.824	189.228	202.832
																			56	327.279	199.193	161.339	158.92	104.678			56	176.037	187.424	198.392
																			57	300.446	194.614	201.614	190.513	95.202			57	174.228	202.085	200.414
																			58	328.34	195.256	194.721	174.293	93.6481			58	176.806	190.846	199.216
																			59	306.065	193.141	172.182	158.96	97.1849			59	170.71	188.209	201.831
																			60	301.003	191.971	197.341		90.4415			60	172.806	201.448	201.651
																			61	352.737	188.14	190.92		98.3644			61	171.551		201.474
																			62	293.52	193.325	200.23		92.3389			62	178.865
																			63	326.635	194.706	195.436		99.3361
																			64		198.856	190.313
																			65			171.949
																			66			208.194
																			67			197.367
																			68			162.126
																			69			205.07
																			70			187.658

## Sheet: MP activity- preBotC to 7n
Two Way Analysis of Variance SigmaPlot v11					Analysis Summary				Mann-Whitney Analysis											DATA preBotC to 7n								DATA control
										Below threshold?	P value	Mean rank of preotC to 7n	Mean rank of control	Mean rank diff.	Mann-Whitney U	Adjusted P Value				AUC MP								AUC MP
Two Way Analysis of Variance					Table Analyzed	MP data			off	No	>0.999999	4.5	4.5	0	7.5	>0.999999				rats	off	P1	P2	off				rats	off	P1	P2	off
									P1	No	0.392857	5.2	3.333	1.867	4	>0.999999				20210716A	0.0462816	0.0464134	0.0426269	0.0482508				20210917B	0.0626461	0.0605991	0.0611344	0.0626977
Data source: Data 1 in MP activity- sigma					Column A	50 HZ mix			P2	No	0.142857	3.4	6.333	-2.933	2	0.571429				20210716B	0.0533022	0.0420559	0.0378508	0.049533				20210917C	0.0446777	0.0447356	0.0402258	0.0468714
					vs.	vs.			off2	No	0.392857	3.8	5.667	-1.867	4	>0.999999				20210716C	0.0461617	0.0455431	0.0388179	0.0452815				20210917D	0.0701574	0.0692036	0.0709161	0.0701628
General Linear Model					Column B	control														20210714A	0.0569769	0.0621283	0.0505059	0.0525814
																				20210714B	0.0605322	0.0613897	0.0546985	0.0626885
Dependent Variable: data					Test details
					Test name	Mann-Whitney test
Normality Test:	Failed	(P < 0.050)			Comparison for each test	Compare ranks
					Multiple comparisons	Set P value threshold
Equal Variance Test:	Passed	(P = 0.805)			Method	Bonferroni-Dunn method
					Alpha	0.05
																				DATA preBotC to 7n								DATA control
					Number of tests performed	4														AUC MP								AUC MP
					Number of rows omitted	0														rats	off	P1	P2	off				rats	off	P1	P2	off
																				20210716A	100	100.285	92.1033	104.255				20210917B	100	96.7324	97.5869	100.082
																				20210716B	100	78.9009	71.0117	92.9287				20210917C	100	100.13	90.0357	104.91
																				20210716C	100	98.66	84.0913	98.0934				20210917D	100	98.6405	101.081	100.008
																				20210714A	100	109.041	88.6429	92.2855
																				20210714B	100	101.417	90.3625	103.562
					Statistics - only P1 period
					ormality Test:	Failed	(P < 0.050)
					Test execution ended by user request, Rank Sum Test begun
					Mann-Whitney Rank Sum Test	Thursday, November 24, 2022, 9:57:27 AM
					Data source: Data 1 in MP - only P1 period
					Group	N	Missing	Median	0.25	0.75
					preBotC to 7n	5	0	100.285	93.72	103.323
					control	3	0	98.64	97.209	99.757
					Mann-Whitney U Statistic= 4.000
					T = 10.000 n(small)= 3 n(big)= 5 P(est.)= 0.371 P(exact)= 0.393

## Sheet: apnea duration preBotC to 7n
DATA preBotC to 7n					DATA control				apnea duration				missed resp cycles
	apnea duration	1 resp cycle	missed res cycles		rats	apnea duration	missed res cycles		Column B	control			Column B	control
20210716A	0		0		20210917B	0	0		vs.	vs.			vs.	vs.
20210716B	3.625	0.96	3.76		20210917C	0	0		Column A	preBotC to 7n			Column A	preBotC to 7n
20210716C	0		0		20210917D	0	0
20210714A	0		0						Unpaired t test with Welch's correction				Unpaired t test with Welch's correction
20210714B	0		0						P value	0.3739			P value	0.3739
									P value summary	ns			P value summary	ns
									Significantly different (P < 0.05)?	No			Significantly different (P < 0.05)?	No
average	0.725		0.752						One- or two-tailed P value?	Two-tailed			One- or two-tailed P value?	Two-tailed
SD	1.62115		1.68152						Welch-corrected t, df	t=1.000, df=4.000			Welch-corrected t, df	t=1.000, df=4.000
confidence 95%	2.013		2.088
bottom limit	-1.288		-1.336						How big is the difference?				How big is the difference?
upper limit	2.738		2.84						Mean of column A	0.725			Mean of column A	0.752
n	5		5						Mean of column B	0			Mean of column B	0
									Difference between means (B - A) ± SEM	-0.7250 ± 0.7250			Difference between means (B - A) ± SEM	-0.7520 ± 0.7520
									95% confidence interval	-2.738 to 1.288			95% confidence interval	-2.840 to 1.336
									R squared (eta squared)	0.2			R squared (eta squared)	0.2
									Data analyzed				Data analyzed
									Sample size, column A	5			Sample size, column A	5
									Sample size, column B	3			Sample size, column B	3
