# Supplementary material for: Selective transduction and photoinhibition of pre-Bötzinger complex neurons that project to the facial nucleus in rats affects nasofacial activity
Source: eLife. 2023 Sep 29;12:e85398. doi: 10.7554/eLife.85398 (PMC10653671; doi:10.7554/eLife.85398)
Supplement: Figure 8—figure supplement 3—source data 1. [file elife-85398-fig8-figsupp3-data1.xlsx]

## Sheet: ETA-dEMG ket-med
DATA preBotC to 7n							DATA preBotC to 7n							DATA preBotC to 7n							DATA preBotC to 7n								dEMG peak					Statistics
dEMG-baseline							dEMG-laser on							ΔdEMG-baseline							ΔdEMG - laser ON									dia baseline	dia laser ON
Time	20210716A	20210716B	20210716C	202140914A	20210914B		Time	20210716A	20210716B	20210716C	202140914A	20210914B		Time	20210716A	20210716B	20210716C	202140914A	20210914B		Time	20210716A	20210716B	20210716C	202140914A	20210914B			rat 20210716A	0.0385894	0.0203366			Column B	laser ON
-0.15	0.00507512		0.00124584	0.00244923	0.00153356		-0.15	0.00420627	had apnea	0.00135484	0.00172577	0.00288061		-0.15	-0.00633215		-0.0273759	-0.0285367	-0.0184553		-0.15	-0.0071745	had apnea	-0.00934936	-0.0292769	-0.0211083			rat 20210716B					vs.	vs.
-0.1498	0.00507557		0.00124811	0.0024559	0.00153408		-0.1498	0.00421482		0.00135388	0.00173342	0.00287958		-0.1498	-0.00633169		-0.0273737	-0.0285301	-0.0184548		-0.1498	-0.00716595		-0.00935032	-0.0292693	-0.0211093			rat 20210716C	0.0609418	0.0382235			Column A	baseline
-0.1496	0.00507611		0.00124959	0.00246031	0.00153475		-0.1496	0.00421955		0.00135274	0.00174218	0.00287968		-0.1496	-0.00633115		-0.0273722	-0.0285256	-0.0184541		-0.1496	-0.00716122		-0.00935146	-0.0292605	-0.0211092			rat 20210914A	0.0654242	0.0612118
-0.1494	0.00507824		0.00124966	0.00246398	0.00153491		-0.1494	0.00422364		0.00135143	0.00175033	0.00288079		-0.1494	-0.00632902		-0.0273721	-0.028522	-0.0184539		-0.1494	-0.00715714		-0.00935277	-0.0292523	-0.0211081			rat 20210914B	0.049702	0.0414382			Paired t test
-0.1492	0.00507947		0.00125036	0.00246513	0.00153599		-0.1492	0.00423242		0.00134877	0.00175882	0.00288214		-0.1492	-0.00632779		-0.0273714	-0.0285208	-0.0184529		-0.1492	-0.00714835		-0.00935543	-0.0292438	-0.0211067								P value	0.0528
-0.149	0.00508186		0.00125065	0.00247253	0.00153619		-0.149	0.00424436		0.00134691	0.00176872	0.0028813		-0.149	-0.0063254		-0.0273711	-0.0285134	-0.0184527		-0.149	-0.00713641		-0.00935729	-0.0292339	-0.0211076								P value summary	ns
-0.1488	0.00508145		0.0012492	0.00248072	0.0015363		-0.1488	0.00425811		0.00134586	0.00177922	0.00288145		-0.1488	-0.00632581		-0.0273726	-0.0285052	-0.0184526		-0.1488	-0.00712266		-0.00935833	-0.0292234	-0.0211074			Mean	0.05366	0.0403			Significantly different (P < 0.05)?	No
-0.1486	0.00508445		0.00125047	0.00248298	0.00153769		-0.1486	0.00427415		0.00134422	0.00178782	0.00288233		-0.1486	-0.00632281		-0.0273713	-0.028503	-0.0184512		-0.1486	-0.00710662		-0.00935998	-0.0292148	-0.0211065			Std. Deviation	0.01203	0.01675			One- or two-tailed P value?	Two-tailed
-0.1484	0.00508732		0.00125121	0.00248938	0.00153601		-0.1484	0.00429156		0.00134225	0.00179672	0.00288398		-0.1484	-0.00631994		-0.0273706	-0.0284966	-0.0184528		-0.1484	-0.00708921		-0.00936195	-0.0292059	-0.0211049			Std. Error of Mean	0.006015	0.008374			t, df	t=3.112, df=3
-0.1482	0.00509193		0.00125124	0.0025004	0.00153536		-0.1482	0.00430942		0.00134163	0.00180508	0.0028857		-0.1482	-0.00631533		-0.0273705	-0.0284856	-0.0184535		-0.1482	-0.00707135		-0.00936257	-0.0291976	-0.0211032								Number of pairs	4
-0.148	0.00509727		0.00125137	0.00250468	0.00153456		-0.148	0.00432731		0.00133734	0.0018129	0.0028871		-0.148	-0.00630999		-0.0273704	-0.0284813	-0.0184543		-0.148	-0.00705346		-0.00936685	-0.0291898	-0.0211018			Lower 95% CI of mean	0.03452	0.01365
-0.1478	0.00510283		0.00125269	0.00251508	0.00153385		-0.1478	0.00434709		0.0013371	0.0018203	0.00288895		-0.1478	-0.00630443		-0.0273691	-0.0284709	-0.018455		-0.1478	-0.00703368		-0.0093671	-0.0291824	-0.0210999			Upper 95% CI of mean	0.07281	0.06695			How big is the difference?
-0.1476	0.00511003		0.00125324	0.00253158	0.00153459		-0.1476	0.00436903		0.00133372	0.00182761	0.00289023		-0.1476	-0.00629723		-0.0273685	-0.0284544	-0.0184543		-0.1476	-0.00701174		-0.00937048	-0.0291751	-0.0210986								Mean of differences (B - A)	-0.01336
-0.1474	0.00511796		0.00125483	0.00254591	0.0015349		-0.1474	0.00439218		0.00133253	0.00183562	0.002891		-0.1474	-0.0062893		-0.0273669	-0.0284401	-0.018454		-0.1474	-0.00698859		-0.00937167	-0.029167	-0.0210979			Minimum	0.03859	0.02034			SD of differences	0.008586
-0.1472	0.00512604		0.00125453	0.00255463	0.001536		-0.1472	0.00441028		0.00133238	0.0018434	0.00289161		-0.1472	-0.00628123		-0.0273672	-0.0284313	-0.0184529		-0.1472	-0.00697049		-0.00937181	-0.0291593	-0.0210973			Maximum	0.06542	0.06121			SEM of differences	0.004293
-0.147	0.00513342		0.00125689	0.00255609	0.00153546		-0.147	0.00442396		0.0013312	0.00184912	0.00289004		-0.147	-0.00627384		-0.0273649	-0.0284299	-0.0184534		-0.147	-0.00695681		-0.009373	-0.0291535	-0.0210988			Range	0.02683	0.04088			95% confidence interval	-0.02702 to 0.0003007
-0.1468	0.005142		0.00125687	0.00256441	0.00153711		-0.1468	0.00443518		0.00132959	0.00185392	0.00289208		-0.1468	-0.00626527		-0.0273649	-0.0284216	-0.0184517		-0.1468	-0.00694559		-0.00937461	-0.0291487	-0.0210968								R squared (partial eta squared)	0.7635
-0.1466	0.00515037		0.00125861	0.00257233	0.0015377		-0.1466	0.00444084		0.00132756	0.0018592	0.00289214		-0.1466	-0.0062569		-0.0273632	-0.0284136	-0.0184512		-0.1466	-0.00693993		-0.00937664	-0.0291435	-0.0210967
-0.1464	0.00515545		0.00125912	0.00258258	0.00153745		-0.1464	0.00444852		0.00132512	0.00186249	0.00289273		-0.1464	-0.00625181		-0.0273627	-0.0284034	-0.0184514		-0.1464	-0.00693225		-0.00937908	-0.0291402	-0.0210961								Normality of Residuals
-0.1462	0.0051577		0.00126009	0.00259202	0.00153798		-0.1462	0.00445837		0.00132299	0.00186609	0.00289168		-0.1462	-0.00624956		-0.0273617	-0.0283939	-0.0184509		-0.1462	-0.0069224		-0.00938121	-0.0291366	-0.0210972								Test name	Statistics	P value	Passed normality test (alpha=0.05)?	P value summary
-0.146	0.0051579		0.0012608	0.00259841	0.0015372		-0.146	0.00446854		0.00132285	0.00186944	0.00289103		-0.146	-0.00624937		-0.027361	-0.0283876	-0.0184517		-0.146	-0.00691223		-0.00938135	-0.0291332	-0.0210978
-0.1458	0.00515698		0.00126126	0.00260324	0.00153772		-0.1458	0.00448045		0.00132216	0.00187426	0.00289022		-0.1458	-0.00625029		-0.0273605	-0.0283827	-0.0184511		-0.1458	-0.00690032		-0.00938204	-0.0291284	-0.0210986								Shapiro-Wilk (W)	0.935	0.6239	Yes	ns
-0.1456	0.0051539		0.00126188	0.00260726	0.00153991		-0.1456	0.00449168		0.00132093	0.00187918	0.00289294		-0.1456	-0.00625337		-0.0273599	-0.0283787	-0.0184489		-0.1456	-0.0068891		-0.00938327	-0.0291235	-0.0210959								Kolmogorov-Smirnov (distance)	N too small
-0.1454	0.00515169		0.00126353	0.00261137	0.00154019		-0.1454	0.00450223		0.00132047	0.00188254	0.00289399		-0.1454	-0.00625557		-0.0273583	-0.0283746	-0.0184487		-0.1454	-0.00687854		-0.00938373	-0.0291201	-0.0210949
-0.1452	0.00514883		0.00126296	0.00261356	0.0015415		-0.1452	0.00451479		0.00132108	0.00188657	0.00289428		-0.1452	-0.00625843		-0.0273588	-0.0283724	-0.0184474		-0.1452	-0.00686598		-0.00938312	-0.0291161	-0.0210946
-0.145	0.00515067		0.00126298	0.00261559	0.00154098		-0.145	0.00452999		0.00131947	0.00188863	0.00289414		-0.145	-0.00625659		-0.0273588	-0.0283704	-0.0184479		-0.145	-0.00685078		-0.00938473	-0.029114	-0.0210947
-0.1448	0.00515227		0.00126393	0.0026178	0.00154106		-0.1448	0.00454615		0.00131989	0.00189295	0.00289693		-0.1448	-0.00625499		-0.0273579	-0.0283682	-0.0184478		-0.1448	-0.00683462		-0.00938431	-0.0291097	-0.0210919
-0.1446	0.00515666		0.00126391	0.00261921	0.00154131		-0.1446	0.00456353		0.00131935	0.00189754	0.00289717		-0.1446	-0.0062506		-0.0273579	-0.0283668	-0.0184476		-0.1446	-0.00681724		-0.00938485	-0.0291051	-0.0210917
-0.1444	0.00516058		0.00126285	0.00262089	0.00154218		-0.1444	0.0045827		0.00131897	0.00190335	0.00289766		-0.1444	-0.00624668		-0.0273589	-0.0283651	-0.0184467		-0.1444	-0.00679807		-0.00938522	-0.0290993	-0.0210912
-0.1442	0.00516484		0.00126404	0.00262443	0.00154274		-0.1442	0.00460323		0.00131808	0.00190576	0.002898		-0.1442	-0.00624242		-0.0273577	-0.0283615	-0.0184461		-0.1442	-0.00677754		-0.00938612	-0.0290969	-0.0210909
-0.144	0.00517019		0.00126256	0.00262671	0.00154362		-0.144	0.00462449		0.00131747	0.00190748	0.00289939		-0.144	-0.00623707		-0.0273592	-0.0283592	-0.0184452		-0.144	-0.00675628		-0.00938673	-0.0290952	-0.0210895
-0.1438	0.00517555		0.00126275	0.0026299	0.0015444		-0.1438	0.00464472		0.00131728	0.00190955	0.00290166		-0.1438	-0.00623171		-0.027359	-0.0283561	-0.0184445		-0.1438	-0.00673605		-0.00938692	-0.0290931	-0.0210872
-0.1436	0.00518295		0.00126534	0.00263289	0.00154433		-0.1436	0.00466246		0.00131951	0.00191044	0.0029001		-0.1436	-0.00622431		-0.0273564	-0.0283531	-0.0184445		-0.1436	-0.00671831		-0.00938469	-0.0290922	-0.0210888
-0.1434	0.00518869		0.0012656	0.00263697	0.00154405		-0.1434	0.00468029		0.0013199	0.00191145	0.00289983		-0.1434	-0.00621857		-0.0273562	-0.028349	-0.0184448		-0.1434	-0.00670048		-0.00938429	-0.0290912	-0.021089
-0.1432	0.00519637		0.00126549	0.00264151	0.00154484		-0.1432	0.00469717		0.00131947	0.00191115	0.00290078		-0.1432	-0.00621089		-0.0273563	-0.0283445	-0.018444		-0.1432	-0.0066836		-0.00938473	-0.0290915	-0.0210881
-0.143	0.00520438		0.00126712	0.00264515	0.00154556		-0.143	0.0047131		0.00131847	0.00191198	0.00290068		-0.143	-0.00620288		-0.0273547	-0.0283408	-0.0184433		-0.143	-0.00666767		-0.00938573	-0.0290907	-0.0210882
-0.1428	0.00521059		0.00126575	0.00264915	0.00154598		-0.1428	0.00472824		0.00131732	0.00191455	0.00290088		-0.1428	-0.00619667		-0.027356	-0.0283368	-0.0184429		-0.1428	-0.00665253		-0.00938687	-0.0290881	-0.021088
-0.1426	0.00521675		0.00126775	0.00265543	0.0015451		-0.1426	0.00474022		0.00131727	0.00191684	0.002902		-0.1426	-0.00619051		-0.027354	-0.0283305	-0.0184438		-0.1426	-0.00664056		-0.00938693	-0.0290858	-0.0210869
-0.1424	0.00521948		0.00126727	0.00266142	0.00154708		-0.1424	0.0047517		0.00131781	0.0019176	0.00290122		-0.1424	-0.00618778		-0.0273545	-0.0283245	-0.0184418		-0.1424	-0.00662907		-0.00938639	-0.0290851	-0.0210876
-0.1422	0.00522266		0.00126692	0.00267141	0.00154919		-0.1422	0.00476121		0.00131785	0.00191696	0.00289983		-0.1422	-0.0061846		-0.0273549	-0.0283145	-0.0184397		-0.1422	-0.00661956		-0.00938635	-0.0290857	-0.021089
-0.142	0.00522483		0.00126699	0.00268699	0.00154724		-0.142	0.00476887		0.00131788	0.00191519	0.00289965		-0.142	-0.00618243		-0.0273548	-0.028299	-0.0184416		-0.142	-0.0066119		-0.00938632	-0.0290875	-0.0210892
-0.1418	0.00522655		0.00126844	0.00270256	0.0015463		-0.1418	0.00477585		0.0013169	0.00191561	0.00289863		-0.1418	-0.00618071		-0.0273533	-0.0282834	-0.0184426		-0.1418	-0.00660492		-0.0093873	-0.0290871	-0.0210902
-0.1416	0.00522706		0.00126938	0.00271515	0.00154876		-0.1416	0.00478365		0.00131732	0.00191413	0.00289834		-0.1416	-0.0061802		-0.0273524	-0.0282708	-0.0184401		-0.1416	-0.00659712		-0.00938688	-0.0290885	-0.0210905
-0.1414	0.0052272		0.00126856	0.00272763	0.00154949		-0.1414	0.00479017		0.0013153	0.00191521	0.00289629		-0.1414	-0.00618006		-0.0273532	-0.0282583	-0.0184394		-0.1414	-0.0065906		-0.0093889	-0.0290875	-0.0210926
-0.1412	0.00522433		0.00126953	0.00273837	0.00154822		-0.1412	0.00479865		0.00131658	0.00191532	0.00289568		-0.1412	-0.00618293		-0.0273522	-0.0282476	-0.0184406		-0.1412	-0.00658212		-0.00938762	-0.0290873	-0.0210932
-0.141	0.00522261		0.0012708	0.00274616	0.00154842		-0.141	0.00480575		0.00131456	0.00191589	0.00289459		-0.141	-0.00618465		-0.027351	-0.0282398	-0.0184404		-0.141	-0.00657502		-0.00938964	-0.0290868	-0.0210943
-0.1408	0.00522086		0.00127028	0.00275256	0.00154725		-0.1408	0.00481406		0.00131343	0.001917	0.00289282		-0.1408	-0.0061864		-0.0273515	-0.0282334	-0.0184416		-0.1408	-0.00656671		-0.00939077	-0.0290857	-0.021096
-0.1406	0.00521931		0.00127042	0.00275877	0.0015482		-0.1406	0.00482128		0.00131387	0.00191692	0.00289315		-0.1406	-0.00618795		-0.0273514	-0.0282272	-0.0184407		-0.1406	-0.00655949		-0.00939032	-0.0290857	-0.0210957
-0.1404	0.00521905		0.00127149	0.00276449	0.00154949		-0.1404	0.00483028		0.00131433	0.00191844	0.00289184		-0.1404	-0.00618821		-0.0273503	-0.0282215	-0.0184394		-0.1404	-0.0065505		-0.00938987	-0.0290842	-0.021097
-0.1402	0.00521759		0.00127263	0.00277366	0.00154929		-0.1402	0.00483925		0.00131316	0.00191699	0.00289203		-0.1402	-0.00618967		-0.0273492	-0.0282123	-0.0184396		-0.1402	-0.00654153		-0.00939104	-0.0290857	-0.0210968
-0.14	0.0052198		0.00127284	0.00278422	0.00154738		-0.14	0.00484863		0.00131372	0.00191629	0.00288919		-0.14	-0.00618747		-0.0273489	-0.0282017	-0.0184415		-0.14	-0.00653214		-0.00939048	-0.0290864	-0.0210997
-0.1398	0.00522295		0.0012739	0.0027938	0.00154754		-0.1398	0.0048584		0.00131293	0.00191526	0.00288887		-0.1398	-0.00618432		-0.0273479	-0.0281922	-0.0184413		-0.1398	-0.00652237		-0.00939127	-0.0290874	-0.0211
-0.1396	0.00522477		0.00127396	0.00280357	0.00154781		-0.1396	0.00486903		0.00131321	0.00191292	0.0028884		-0.1396	-0.00618249		-0.0273478	-0.0281824	-0.018441		-0.1396	-0.00651174		-0.00939098	-0.0290898	-0.0211005
-0.1394	0.00522851		0.00127432	0.00280953	0.00154745		-0.1394	0.00488047		0.00131259	0.00191265	0.00288708		-0.1394	-0.00617875		-0.0273475	-0.0281764	-0.0184414		-0.1394	-0.0065003		-0.0093916	-0.02909	-0.0211018
-0.1392	0.00523235		0.00127567	0.00281509	0.00154775		-0.1392	0.00489092		0.00131182	0.00191232	0.00288409		-0.1392	-0.00617491		-0.0273461	-0.0281709	-0.0184411		-0.1392	-0.00648985		-0.00939238	-0.0290903	-0.0211048
-0.139	0.00523634		0.00127861	0.0028238	0.00154698		-0.139	0.00490003		0.00131055	0.00191074	0.00288498		-0.139	-0.00617092		-0.0273432	-0.0281622	-0.0184419		-0.139	-0.00648074		-0.00939364	-0.0290919	-0.0211039
-0.1388	0.00523896		0.00128131	0.00283087	0.00154796		-0.1388	0.00491056		0.00131191	0.00191159	0.00288395		-0.1388	-0.00616831		-0.0273405	-0.0281551	-0.0184409		-0.1388	-0.00647021		-0.00939228	-0.0290911	-0.0211049
-0.1386	0.00524259		0.00128334	0.00283771	0.00154721		-0.1386	0.00491848		0.00131119	0.00191191	0.00288357		-0.1386	-0.00616467		-0.0273384	-0.0281482	-0.0184417		-0.1386	-0.0064623		-0.00939301	-0.0290908	-0.0211053
-0.1384	0.00524496		0.0012838	0.00284473	0.00154861		-0.1384	0.00492283		0.00131147	0.00191261	0.00288273		-0.1384	-0.0061623		-0.027338	-0.0281412	-0.0184402		-0.1384	-0.00645795		-0.00939273	-0.0290901	-0.0211061
-0.1382	0.0052482		0.00128429	0.00285317	0.0015473		-0.1382	0.00492687		0.00131298	0.00191409	0.00288153		-0.1382	-0.00615907		-0.0273375	-0.0281328	-0.0184416		-0.1382	-0.0064539		-0.00939122	-0.0290886	-0.0211073
-0.138	0.0052506		0.00128417	0.00286222	0.00154536		-0.138	0.00492937		0.00131284	0.00191286	0.00288015		-0.138	-0.00615666		-0.0273376	-0.0281237	-0.0184435		-0.138	-0.0064514		-0.00939136	-0.0290898	-0.0211087
-0.1378	0.00525033		0.00128533	0.00286937	0.00154689		-0.1378	0.00493337		0.00131283	0.00191388	0.00287838		-0.1378	-0.00615693		-0.0273364	-0.0281166	-0.018442		-0.1378	-0.0064474		-0.00939137	-0.0290888	-0.0211105
-0.1376	0.00525084		0.00128693	0.00287601	0.00154672		-0.1376	0.00493633		0.00131143	0.00191392	0.00287727		-0.1376	-0.00615642		-0.0273348	-0.02811	-0.0184421		-0.1376	-0.00644444		-0.00939277	-0.0290887	-0.0211116
-0.1374	0.00525062		0.00128788	0.00288316	0.00154689		-0.1374	0.0049389		0.00131307	0.00191524	0.00287829		-0.1374	-0.00615664		-0.0273339	-0.0281028	-0.018442		-0.1374	-0.00644187		-0.00939113	-0.0290874	-0.0211106
-0.1372	0.00525062		0.00128964	0.00288989	0.0015452		-0.1372	0.00494057		0.00131358	0.0019157	0.00287843		-0.1372	-0.00615664		-0.0273321	-0.0280961	-0.0184437		-0.1372	-0.0064402		-0.00939062	-0.029087	-0.0211104
-0.137	0.00524861		0.00129125	0.0028992	0.00154471		-0.137	0.00494258		0.00131416	0.00191577	0.00287482		-0.137	-0.00615865		-0.0273305	-0.0280868	-0.0184441		-0.137	-0.00643819		-0.00939004	-0.0290869	-0.021114
-0.1368	0.00524619		0.00129335	0.00290813	0.00154473		-0.1368	0.00494078		0.00131322	0.00191643	0.00287366		-0.1368	-0.00616107		-0.0273284	-0.0280778	-0.0184441		-0.1368	-0.00643999		-0.00939098	-0.0290862	-0.0211152
-0.1366	0.00524382		0.00129297	0.00291647	0.00154471		-0.1366	0.00494353		0.00131333	0.00191873	0.00287324		-0.1366	-0.00616344		-0.0273288	-0.0280695	-0.0184441		-0.1366	-0.00643724		-0.00939087	-0.0290839	-0.0211156
-0.1364	0.00523961		0.0012933	0.00292549	0.0015441		-0.1364	0.00494382		0.00131418	0.00192054	0.00287129		-0.1364	-0.00616765		-0.0273285	-0.0280605	-0.0184448		-0.1364	-0.00643695		-0.00939001	-0.0290821	-0.0211176
-0.1362	0.00523515		0.00129305	0.00293268	0.00154376		-0.1362	0.00494628		0.00131428	0.00192156	0.00286987		-0.1362	-0.00617211		-0.0273287	-0.0280533	-0.0184451		-0.1362	-0.00643449		-0.00938992	-0.0290811	-0.021119
-0.136	0.00522901		0.00129475	0.00294103	0.00154508		-0.136	0.00495205		0.00131501	0.00192322	0.0028684		-0.136	-0.00617826		-0.027327	-0.0280449	-0.0184438		-0.136	-0.00642872		-0.00938918	-0.0290794	-0.0211205
-0.1358	0.00522531		0.0012958	0.00294795	0.00154566		-0.1358	0.0049559		0.00131651	0.00192634	0.00286649		-0.1358	-0.00618196		-0.027326	-0.028038	-0.0184432		-0.1358	-0.00642487		-0.00938768	-0.0290763	-0.0211224
-0.1356	0.00522252		0.00129659	0.00295524	0.00154583		-0.1356	0.00496319		0.00131599	0.00192868	0.00286693		-0.1356	-0.00618474		-0.0273252	-0.0280307	-0.018443		-0.1356	-0.00641758		-0.00938821	-0.029074	-0.0211219
-0.1354	0.00522266		0.00129725	0.00296375	0.00154569		-0.1354	0.00497497		0.00131599	0.00193141	0.00286551		-0.1354	-0.0061846		-0.0273245	-0.0280222	-0.0184432		-0.1354	-0.0064058		-0.00938821	-0.0290713	-0.0211234
-0.1352	0.00522269		0.00129629	0.00297292	0.00154496		-0.1352	0.0049852		0.00131627	0.00193559	0.00286287		-0.1352	-0.00618458		-0.0273255	-0.028013	-0.0184439		-0.1352	-0.00639558		-0.00938793	-0.0290671	-0.021126
-0.135	0.00522498		0.00129676	0.00298105	0.00154546		-0.135	0.004998		0.00131446	0.00194005	0.00286165		-0.135	-0.00618228		-0.027325	-0.0280049	-0.0184434		-0.135	-0.00638277		-0.00938973	-0.0290626	-0.0211272
-0.1348	0.00522446		0.00129888	0.0029896	0.00154751		-0.1348	0.00500807		0.0013135	0.00194271	0.00285988		-0.1348	-0.00618281		-0.0273229	-0.0279964	-0.0184413		-0.1348	-0.0063727		-0.00939069	-0.02906	-0.021129
-0.1346	0.00522119		0.00130048	0.00299778	0.00154627		-0.1346	0.00502128		0.00131416	0.00194737	0.00285849		-0.1346	-0.00618608		-0.0273213	-0.0279882	-0.0184426		-0.1346	-0.00635949		-0.00939004	-0.0290553	-0.0211304
-0.1344	0.00521918		0.00130137	0.00300597	0.00154691		-0.1344	0.00503659		0.0013148	0.00195255	0.00285555		-0.1344	-0.00618808		-0.0273204	-0.02798	-0.018442		-0.1344	-0.00634418		-0.0093894	-0.0290501	-0.0211333
-0.1342	0.00521648		0.00130291	0.00301316	0.00154692		-0.1342	0.00504994		0.00131275	0.0019567	0.00285303		-0.1342	-0.00619078		-0.0273189	-0.0279728	-0.0184419		-0.1342	-0.00633083		-0.00939145	-0.029046	-0.0211358
-0.134	0.00521239		0.00130567	0.0030222	0.00154696		-0.134	0.00506049		0.00131288	0.00196184	0.00285028		-0.134	-0.00619487		-0.0273161	-0.0279638	-0.0184419		-0.134	-0.00632028		-0.00939132	-0.0290408	-0.0211386
-0.1338	0.00520772		0.0013095	0.00303041	0.00154625		-0.1338	0.00506619		0.00131195	0.00196969	0.00284849		-0.1338	-0.00619955		-0.0273123	-0.0279555	-0.0184426		-0.1338	-0.00631458		-0.00939225	-0.029033	-0.0211404
-0.1336	0.005202		0.0013114	0.00303787	0.00154756		-0.1336	0.00506953		0.00131175	0.00197472	0.00284401		-0.1336	-0.00620527		-0.0273104	-0.0279481	-0.0184413		-0.1336	-0.00631124		-0.00939245	-0.0290279	-0.0211449
-0.1334	0.00519731		0.00131565	0.00304611	0.0015473		-0.1334	0.00507108		0.00131177	0.0019817	0.00284371		-0.1334	-0.00620995		-0.0273061	-0.0279398	-0.0184416		-0.1334	-0.0063097		-0.00939243	-0.029021	-0.0211452
-0.1332	0.00519124		0.001317	0.00305457	0.00154587		-0.1332	0.00507966		0.00131191	0.00198997	0.00284222		-0.1332	-0.00621602		-0.0273048	-0.0279314	-0.018443		-0.1332	-0.00630111		-0.00939229	-0.0290127	-0.0211466
-0.133	0.00518696		0.00132125	0.00306236	0.00154509		-0.133	0.00508733		0.00131102	0.00199752	0.00283827		-0.133	-0.0062203		-0.0273005	-0.0279236	-0.0184438		-0.133	-0.00629344		-0.00939318	-0.0290051	-0.0211506
-0.1328	0.00518206		0.00132207	0.00306957	0.00154594		-0.1328	0.00510083		0.00131037	0.00200401	0.00283682		-0.1328	-0.0062252		-0.0272997	-0.0279164	-0.0184429		-0.1328	-0.00627995		-0.00939383	-0.0289987	-0.021152
-0.1326	0.00517605		0.00132404	0.00307662	0.00154647		-0.1326	0.00512037		0.00131036	0.00201162	0.0028361		-0.1326	-0.00623122		-0.0272977	-0.0279093	-0.0184424		-0.1326	-0.0062604		-0.00939384	-0.028991	-0.0211528
-0.1324	0.00517368		0.00132676	0.00308269	0.00154696		-0.1324	0.00513856		0.00130928	0.00201792	0.00283402		-0.1324	-0.00623358		-0.027295	-0.0279033	-0.0184419		-0.1324	-0.00624221		-0.00939492	-0.0289847	-0.0211548
-0.1322	0.00516932		0.00132778	0.00308875	0.0015483		-0.1322	0.00515358		0.00130838	0.00202615	0.00283109		-0.1322	-0.00623794		-0.027294	-0.0278972	-0.0184406		-0.1322	-0.00622719		-0.00939582	-0.0289765	-0.0211578
-0.132	0.00516778		0.00132935	0.00309474	0.00154954		-0.132	0.00516922		0.00130618	0.002034	0.00282993		-0.132	-0.00623948		-0.0272924	-0.0278912	-0.0184393		-0.132	-0.00621155		-0.00939802	-0.0289687	-0.0211589
-0.1318	0.00516748		0.00133006	0.00310071	0.00154915		-0.1318	0.0051842		0.00130546	0.00204109	0.00282922		-0.1318	-0.00623978		-0.0272917	-0.0278853	-0.0184397		-0.1318	-0.00619657		-0.00939874	-0.0289616	-0.0211596
-0.1316	0.00516657		0.00133188	0.00310721	0.00154873		-0.1316	0.00520051		0.0013045	0.00204766	0.00282748		-0.1316	-0.0062407		-0.0272899	-0.0278787	-0.0184401		-0.1316	-0.00618026		-0.0093997	-0.028955	-0.0211614
-0.1314	0.00516524		0.0013322	0.00311294	0.00154926		-0.1314	0.00522098		0.00130451	0.00205359	0.00282594		-0.1314	-0.00624202		-0.0272896	-0.027873	-0.0184396		-0.1314	-0.00615979		-0.00939969	-0.0289491	-0.0211629
-0.1312	0.00516372		0.00133373	0.00311873	0.00154877		-0.1312	0.00523884		0.0013057	0.00206241	0.00282399		-0.1312	-0.00624354		-0.0272881	-0.0278672	-0.0184401		-0.1312	-0.00614193		-0.00939849	-0.0289403	-0.0211649
-0.131	0.00516093		0.00133393	0.00312319	0.00154831		-0.131	0.00525015		0.00130584	0.00207063	0.00282348		-0.131	-0.00624633		-0.0272878	-0.0278628	-0.0184406		-0.131	-0.00613063		-0.00939836	-0.028932	-0.0211654
-0.1308	0.00515802		0.00133258	0.00312813	0.00154834		-0.1308	0.00525934		0.00130613	0.00207875	0.00282321		-0.1308	-0.00624924		-0.0272892	-0.0278578	-0.0184405		-0.1308	-0.00612143		-0.00939807	-0.0289239	-0.0211657
-0.1306	0.005157		0.00133333	0.00313326	0.00154722		-0.1306	0.00527264		0.00130543	0.00208615	0.00282157		-0.1306	-0.00625026		-0.0272884	-0.0278527	-0.0184416		-0.1306	-0.00610813		-0.00939877	-0.0289165	-0.0211673
-0.1304	0.00515538		0.00133434	0.00313737	0.00154772		-0.1304	0.00529221		0.0013052	0.00209309	0.00281994		-0.1304	-0.00625188		-0.0272874	-0.0278486	-0.0184411		-0.1304	-0.00608857		-0.009399	-0.0289096	-0.0211689
-0.1302	0.00515052		0.00133344	0.00314311	0.00154693		-0.1302	0.00531373		0.00130532	0.00209895	0.00281705		-0.1302	-0.00625674		-0.0272883	-0.0278428	-0.0184419		-0.1302	-0.00606704		-0.00939887	-0.0289037	-0.0211718
-0.13	0.00514762		0.00133287	0.00314606	0.00154791		-0.13	0.00533379		0.00130568	0.00210553	0.00281561		-0.13	-0.00625964		-0.0272889	-0.0278399	-0.0184409		-0.13	-0.00604698		-0.00939852	-0.0288971	-0.0211733
-0.1298	0.00514423		0.00133389	0.00315	0.00154895		-0.1298	0.00535359		0.00130532	0.00211201	0.00281364		-0.1298	-0.00626303		-0.0272879	-0.027836	-0.0184399		-0.1298	-0.00602718		-0.00939888	-0.0288907	-0.0211752
-0.1296	0.00514135		0.00133346	0.00315473	0.00154782		-0.1296	0.00537069		0.00130437	0.00211849	0.00281394		-0.1296	-0.00626591		-0.0272883	-0.0278312	-0.018441		-0.1296	-0.00601008		-0.00939983	-0.0288842	-0.0211749
-0.1294	0.00513895		0.00133402	0.00315977	0.00154717		-0.1294	0.00538301		0.00130369	0.00212485	0.00281395		-0.1294	-0.00626831		-0.0272878	-0.0278262	-0.0184417		-0.1294	-0.00599776		-0.00940051	-0.0288778	-0.0211749
-0.1292	0.0051372		0.00133596	0.00316271	0.00154689		-0.1292	0.00538768		0.00130291	0.0021313	0.00281154		-0.1292	-0.00627007		-0.0272858	-0.0278233	-0.018442		-0.1292	-0.00599309		-0.00940128	-0.0288714	-0.0211773
-0.129	0.00513669		0.00133693	0.00316624	0.00154643		-0.129	0.00538671		0.00130389	0.00213542	0.00281038		-0.129	-0.00627057		-0.0272848	-0.0278197	-0.0184424		-0.129	-0.00599406		-0.0094003	-0.0288672	-0.0211785
-0.1288	0.00513784		0.001338	0.00317133	0.00154484		-0.1288	0.0053835		0.0013035	0.00214373	0.00280957		-0.1288	-0.00626942		-0.0272838	-0.0278146	-0.018444		-0.1288	-0.00599728		-0.0094007	-0.0288589	-0.0211793
-0.1286	0.00514052		0.0013369	0.00317589	0.00154411		-0.1286	0.00538127		0.00130257	0.00214814	0.00280816		-0.1286	-0.00626674		-0.0272849	-0.0278101	-0.0184447		-0.1286	-0.0059995		-0.00940162	-0.0288545	-0.0211807
-0.1284	0.00514329		0.00133612	0.00317937	0.00154267		-0.1284	0.00538047		0.00130196	0.00215438	0.00280528		-0.1284	-0.00626397		-0.0272857	-0.0278066	-0.0184462		-0.1284	-0.0060003		-0.00940224	-0.0288483	-0.0211836
-0.1282	0.00514724		0.00133856	0.00318435	0.00154251		-0.1282	0.00538114		0.00130054	0.00215937	0.00280173		-0.1282	-0.00626002		-0.0272832	-0.0278016	-0.0184464		-0.1282	-0.00599963		-0.00940366	-0.0288433	-0.0211871
-0.128	0.00515196		0.00134063	0.00318772	0.0015431		-0.128	0.00538141		0.00130065	0.00216656	0.00279795		-0.128	-0.0062553		-0.0272811	-0.0277982	-0.0184458		-0.128	-0.00599936		-0.00940354	-0.0288361	-0.0211909
-0.1278	0.00515598		0.00134154	0.00319145	0.00154259		-0.1278	0.00538279		0.00130053	0.00217299	0.00279481		-0.1278	-0.00625128		-0.0272802	-0.0277945	-0.0184463		-0.1278	-0.00599798		-0.00940367	-0.0288297	-0.0211941
-0.1276	0.00515744		0.00134366	0.00319594	0.00154369		-0.1276	0.0053816		0.00129986	0.00217625	0.00279214		-0.1276	-0.00624982		-0.0272781	-0.02779	-0.0184452		-0.1276	-0.00599917		-0.00940434	-0.0288264	-0.0211967
-0.1274	0.00516145		0.00134494	0.00319911	0.00154418		-0.1274	0.0053823		0.00130047	0.00218096	0.00279008		-0.1274	-0.00624581		-0.0272768	-0.0277869	-0.0184447		-0.1274	-0.00599847		-0.00940373	-0.0288217	-0.0211988
-0.1272	0.00516482		0.00134624	0.00320147	0.00154338		-0.1272	0.00538053		0.00130074	0.00218501	0.00278842		-0.1272	-0.00624244		-0.0272755	-0.0277845	-0.0184455		-0.1272	-0.00600024		-0.00940346	-0.0288177	-0.0212004
-0.127	0.00516624		0.00134674	0.0032035	0.00154398		-0.127	0.00537464		0.0013004	0.00218745	0.00278808		-0.127	-0.00624102		-0.027275	-0.0277825	-0.0184449		-0.127	-0.00600614		-0.0094038	-0.0288152	-0.0212008
-0.1268	0.00516458		0.00134724	0.00320568	0.00154416		-0.1268	0.0053673		0.00130112	0.00219093	0.00278576		-0.1268	-0.00624269		-0.0272745	-0.0277803	-0.0184447		-0.1268	-0.00601347		-0.00940308	-0.0288117	-0.0212031
-0.1266	0.0051614		0.00134841	0.00320673	0.00154451		-0.1266	0.00536091		0.00130128	0.00219462	0.00278172		-0.1266	-0.00624586		-0.0272734	-0.0277792	-0.0184443		-0.1266	-0.00601986		-0.00940292	-0.0288081	-0.0212071
-0.1264	0.00515603		0.00135113	0.00320939	0.00154438		-0.1264	0.00535642		0.00129893	0.00219793	0.00277897		-0.1264	-0.00625123		-0.0272707	-0.0277766	-0.0184445		-0.1264	-0.00602435		-0.00940527	-0.0288047	-0.0212099
-0.1262	0.00515094		0.00135566	0.00320997	0.00154486		-0.1262	0.00535176		0.00129804	0.00220206	0.00277629		-0.1262	-0.00625632		-0.0272661	-0.027776	-0.018444		-0.1262	-0.00602901		-0.00940615	-0.0288006	-0.0212126
-0.126	0.00514803		0.00135798	0.00321071	0.00154697		-0.126	0.00534107		0.00129704	0.0022031	0.00277576		-0.126	-0.00625924		-0.0272638	-0.0277753	-0.0184419		-0.126	-0.0060397		-0.00940716	-0.0287996	-0.0212131
-0.1258	0.00514804		0.00136411	0.00321363	0.00154779		-0.1258	0.00533415		0.00129763	0.00220565	0.00277277		-0.1258	-0.00625922		-0.0272577	-0.0277723	-0.0184411		-0.1258	-0.00604662		-0.00940656	-0.028797	-0.0212161
-0.1256	0.00514921		0.00137204	0.00321478	0.00154921		-0.1256	0.00532959		0.00129847	0.00220866	0.002771		-0.1256	-0.00625806		-0.0272497	-0.0277712	-0.0184396		-0.1256	-0.00605118		-0.00940573	-0.028794	-0.0212179
-0.1254	0.00515326		0.00138142	0.00321718	0.00154948		-0.1254	0.00532937		0.00129949	0.00220945	0.00277223		-0.1254	-0.006254		-0.0272404	-0.0277688	-0.0184394		-0.1254	-0.0060514		-0.0094047	-0.0287932	-0.0212166
-0.1252	0.00515689		0.00138942	0.00321758	0.00154877		-0.1252	0.0053301		0.00129879	0.00221168	0.00276732		-0.1252	-0.00625037		-0.0272324	-0.0277684	-0.0184401		-0.1252	-0.00605068		-0.00940541	-0.028791	-0.0212215
-0.125	0.00516191		0.00140344	0.0032196	0.00154903		-0.125	0.00533426		0.00130018	0.00221158	0.0027675		-0.125	-0.00624535		-0.0272183	-0.0277664	-0.0184398		-0.125	-0.00604651		-0.00940401	-0.0287911	-0.0212214
-0.1248	0.00516865		0.00143725	0.00322125	0.00154719		-0.1248	0.0053371		0.00130091	0.00221299	0.00276607		-0.1248	-0.00623861		-0.0271845	-0.0277647	-0.0184417		-0.1248	-0.00604368		-0.00940329	-0.0287897	-0.0212228
-0.1246	0.00517642		0.00148909	0.00322317	0.00154734		-0.1246	0.00533623		0.0012997	0.00221198	0.00276469		-0.1246	-0.00623085		-0.0271327	-0.0277628	-0.0184415		-0.1246	-0.00604454		-0.0094045	-0.0287907	-0.0212242
-0.1244	0.00518466		0.00153977	0.0032233	0.00154586		-0.1244	0.00533174		0.00130023	0.00221359	0.00276561		-0.1244	-0.0062226		-0.027082	-0.0277627	-0.018443		-0.1244	-0.00604903		-0.00940397	-0.0287891	-0.0212233
-0.1242	0.00519112		0.00158633	0.00322454	0.00154457		-0.1242	0.00532438		0.0013003	0.00221381	0.00276361		-0.1242	-0.00621614		-0.0270354	-0.0277614	-0.0184443		-0.1242	-0.00605639		-0.0094039	-0.0287889	-0.0212253
-0.124	0.0051967		0.00160933	0.00322616	0.00154534		-0.124	0.00531241		0.00130131	0.00221281	0.00276157		-0.124	-0.00621056		-0.0270124	-0.0277598	-0.0184435		-0.124	-0.00606836		-0.00940289	-0.0287899	-0.0212273
-0.1238	0.00520088		0.00162111	0.0032283	0.00154371		-0.1238	0.00529705		0.00130175	0.00221403	0.00276315		-0.1238	-0.00620638		-0.0270007	-0.0277577	-0.0184451		-0.1238	-0.00608372		-0.00940245	-0.0287886	-0.0212257
-0.1236	0.00520293		0.0016556	0.00323109	0.00154374		-0.1236	0.00527973		0.00130206	0.00221418	0.00276334		-0.1236	-0.00620433		-0.0269662	-0.0277549	-0.0184451		-0.1236	-0.00610104		-0.00940214	-0.0287885	-0.0212255
-0.1234	0.00520302		0.00170486	0.00323319	0.00154319		-0.1234	0.00526306		0.00130199	0.00221472	0.00276096		-0.1234	-0.00620424		-0.0269169	-0.0277528	-0.0184457		-0.1234	-0.00611771		-0.00940221	-0.0287879	-0.0212279
-0.1232	0.00520044		0.00176099	0.00323833	0.00154283		-0.1232	0.00524411		0.00130245	0.00221506	0.00276214		-0.1232	-0.00620683		-0.0268608	-0.0277476	-0.018446		-0.1232	-0.00613666		-0.00940175	-0.0287876	-0.0212267
-0.123	0.00519532		0.0018167	0.00324182	0.00154142		-0.123	0.00522893		0.00130328	0.0022139	0.00276187		-0.123	-0.00621194		-0.0268051	-0.0277441	-0.0184474		-0.123	-0.00615184		-0.00940091	-0.0287888	-0.021227
-0.1228	0.00519085		0.00187005	0.00324761	0.00154121		-0.1228	0.00521285		0.00130194	0.00221356	0.0027616		-0.1228	-0.00621641		-0.0267517	-0.0277384	-0.0184476		-0.1228	-0.00616792		-0.00940226	-0.0287891	-0.0212273
-0.1226	0.00518567		0.00191095	0.0032567	0.00154141		-0.1226	0.00519934		0.00130173	0.00221514	0.00275981		-0.1226	-0.00622159		-0.0267108	-0.0277293	-0.0184474		-0.1226	-0.00618143		-0.00940247	-0.0287875	-0.0212291
-0.1224	0.00517762		0.0019438	0.00326778	0.00154105		-0.1224	0.0051891		0.00130089	0.00221613	0.00275525		-0.1224	-0.00622964		-0.026678	-0.0277182	-0.0184478		-0.1224	-0.00619167		-0.0094033	-0.0287865	-0.0212336
-0.1222	0.00516699		0.00196612	0.00327828	0.00154107		-0.1222	0.00518009		0.00130133	0.00221642	0.0027519		-0.1222	-0.00624027		-0.0266557	-0.0277077	-0.0184478		-0.1222	-0.00620068		-0.00940287	-0.0287862	-0.021237
-0.122	0.00515426		0.00197994	0.003288	0.00154078		-0.122	0.00516917		0.00130247	0.00221831	0.0027456		-0.122	-0.006253		-0.0266418	-0.027698	-0.0184481		-0.122	-0.0062116		-0.00940173	-0.0287844	-0.0212433
-0.1218	0.00514078		0.00198704	0.00329428	0.00154093		-0.1218	0.00516213		0.00130129	0.00221763	0.00274092		-0.1218	-0.00626648		-0.0266347	-0.0276917	-0.0184479		-0.1218	-0.00621864		-0.00940291	-0.028785	-0.0212479
-0.1216	0.0051298		0.00200693	0.00329703	0.00154141		-0.1216	0.00515811		0.00130115	0.00221787	0.00273433		-0.1216	-0.00627746		-0.0266149	-0.0276889	-0.0184474		-0.1216	-0.00622266		-0.00940305	-0.0287848	-0.0212545
-0.1214	0.00512239		0.00203688	0.00329848	0.00154112		-0.1214	0.00515541		0.00130095	0.00221864	0.00272757		-0.1214	-0.00628487		-0.0265849	-0.0276875	-0.0184477		-0.1214	-0.00622536		-0.00940325	-0.028784	-0.0212613
-0.1212	0.00511635		0.00206974	0.00330242	0.00153877		-0.1212	0.00515467		0.00130013	0.00221938	0.00271776		-0.1212	-0.00629091		-0.026552	-0.0276835	-0.0184501		-0.1212	-0.0062261		-0.00940407	-0.0287833	-0.0212711
-0.121	0.0051104		0.00210332	0.00330839	0.00153897		-0.121	0.00515391		0.00130061	0.00222189	0.00270631		-0.121	-0.00629686		-0.0265185	-0.0276776	-0.0184499		-0.121	-0.00622686		-0.00940359	-0.0287808	-0.0212826
-0.1208	0.00510317		0.00213183	0.00331351	0.00154162		-0.1208	0.0051569		0.00129942	0.00222254	0.00269655		-0.1208	-0.00630409		-0.02649	-0.0276725	-0.0184472		-0.1208	-0.00622388		-0.00940478	-0.0287801	-0.0212923
-0.1206	0.00509486		0.00215451	0.0033185	0.00154007		-0.1206	0.00515299		0.0013002	0.00222424	0.00268438		-0.1206	-0.0063124		-0.0264673	-0.0276675	-0.0184488		-0.1206	-0.00622778		-0.009404	-0.0287784	-0.0213045
-0.1204	0.00508503		0.00216973	0.00332338	0.00154166		-0.1204	0.00514815		0.00129863	0.00222545	0.00267317		-0.1204	-0.00632223		-0.026452	-0.0276626	-0.0184472		-0.1204	-0.00623262		-0.00940557	-0.0287772	-0.0213157
-0.1202	0.00507391		0.00217894	0.00332726	0.00154204		-0.1202	0.00513911		0.00129787	0.00222534	0.00266155		-0.1202	-0.00633335		-0.0264428	-0.0276587	-0.0184468		-0.1202	-0.00624166		-0.00940632	-0.0287773	-0.0213273
-0.12	0.00506105		0.00218339	0.0033306	0.00154237		-0.12	0.00512492		0.00129787	0.00222599	0.00264699		-0.12	-0.00634621		-0.0264384	-0.0276554	-0.0184465		-0.12	-0.00625585		-0.00940633	-0.0287767	-0.0213419
-0.1198	0.00504971		0.00218568	0.00333317	0.00154153		-0.1198	0.00511028		0.00129699	0.0022283	0.00263315		-0.1198	-0.00635756		-0.0264361	-0.0276528	-0.0184473		-0.1198	-0.00627049		-0.00940721	-0.0287744	-0.0213557
-0.1196	0.00503661		0.00218844	0.00333621	0.00154325		-0.1196	0.00508953		0.00129716	0.00222882	0.00261802		-0.1196	-0.00637065		-0.0264333	-0.0276498	-0.0184456		-0.1196	-0.00629124		-0.00940704	-0.0287738	-0.0213708
-0.1194	0.00502322		0.00219083	0.0033397	0.00154314		-0.1194	0.00507128		0.00129709	0.00222821	0.00260164		-0.1194	-0.00638404		-0.0264309	-0.0276463	-0.0184457		-0.1194	-0.0063095		-0.00940711	-0.0287745	-0.0213872
-0.1192	0.00501107		0.00219168	0.00334225	0.00154515		-0.1192	0.00504952		0.00129694	0.0022296	0.00258841		-0.1192	-0.00639619		-0.0264301	-0.0276437	-0.0184437		-0.1192	-0.00633125		-0.00940726	-0.0287731	-0.0214005
-0.119	0.00500075		0.0021927	0.00334543	0.00154399		-0.119	0.00502841		0.00129782	0.00223293	0.00257274		-0.119	-0.00640651		-0.0264291	-0.0276405	-0.0184449		-0.119	-0.00635237		-0.00940638	-0.0287697	-0.0214161
-0.1188	0.00499073		0.00219669	0.00334874	0.00154443		-0.1188	0.00500535		0.00129778	0.00223558	0.00255619		-0.1188	-0.00641653		-0.0264251	-0.0276372	-0.0184444		-0.1188	-0.00637542		-0.00940641	-0.0287671	-0.0214327
-0.1186	0.00498177		0.00220112	0.00335179	0.00154481		-0.1186	0.00498484		0.0012982	0.00223767	0.00254021		-0.1186	-0.00642549		-0.0264207	-0.0276342	-0.0184441		-0.1186	-0.00639594		-0.009406	-0.028765	-0.0214487
-0.1184	0.00497378		0.00220694	0.00335573	0.0015443		-0.1184	0.00497162		0.00129874	0.00223776	0.00252594		-0.1184	-0.00643348		-0.0264148	-0.0276302	-0.0184446		-0.1184	-0.00640915		-0.00940545	-0.0287649	-0.0214629
-0.1182	0.0049668		0.0022135	0.00335881	0.0015436		-0.1182	0.00495495		0.00130058	0.0022385	0.00251082		-0.1182	-0.00644046		-0.0264083	-0.0276272	-0.0184453		-0.1182	-0.00642583		-0.00940362	-0.0287642	-0.021478
-0.118	0.0049612		0.00221815	0.00336412	0.00154248		-0.118	0.00494608		0.00130159	0.00224141	0.0024948		-0.118	-0.00644606		-0.0264036	-0.0276218	-0.0184464		-0.118	-0.0064347		-0.00940261	-0.0287613	-0.0214941
-0.1178	0.00495646		0.00222242	0.00336963	0.00154281		-0.1178	0.00494485		0.00130301	0.00224412	0.0024807		-0.1178	-0.0064508		-0.0263994	-0.0276163	-0.018446		-0.1178	-0.00643592		-0.00940119	-0.0287585	-0.0215082
-0.1176	0.00495226		0.00222491	0.00337369	0.00154341		-0.1176	0.00494262		0.00130556	0.00224601	0.00246755		-0.1176	-0.00645501		-0.0263969	-0.0276123	-0.0184454		-0.1176	-0.00643815		-0.00939864	-0.0287567	-0.0215213
-0.1174	0.00494912		0.00222623	0.00337791	0.00154417		-0.1174	0.00494025		0.00130616	0.00224803	0.00245303		-0.1174	-0.00645815		-0.0263956	-0.0276081	-0.0184447		-0.1174	-0.00644052		-0.00939804	-0.0287546	-0.0215358
-0.1172	0.00494782		0.00223016	0.00338243	0.00154403		-0.1172	0.00493433		0.00130727	0.00224938	0.00243749		-0.1172	-0.00645945		-0.0263916	-0.0276035	-0.0184448		-0.1172	-0.00644644		-0.00939693	-0.0287533	-0.0215514
-0.117	0.00494482		0.00223316	0.00338743	0.00154398		-0.117	0.00492441		0.00130853	0.0022517	0.00242406		-0.117	-0.00646244		-0.0263886	-0.0275985	-0.0184449		-0.117	-0.00645636		-0.00939566	-0.028751	-0.0215648
-0.1168	0.00494161		0.00223793	0.00339164	0.00154445		-0.1168	0.00491076		0.00130853	0.0022524	0.0024125		-0.1168	-0.00646565		-0.0263838	-0.0275943	-0.0184444		-0.1168	-0.00647001		-0.00939567	-0.0287503	-0.0215764
-0.1166	0.00493871		0.00224274	0.00339806	0.00154357		-0.1166	0.00489819		0.00130906	0.0022539	0.00239914		-0.1166	-0.00646855		-0.026379	-0.0275879	-0.0184453		-0.1166	-0.00648258		-0.00939514	-0.0287488	-0.0215897
-0.1164	0.00493427		0.00224238	0.00340415	0.00154279		-0.1164	0.00488925		0.00131055	0.00225822	0.0023864		-0.1164	-0.00647299		-0.0263794	-0.0275818	-0.0184461		-0.1164	-0.00649152		-0.00939365	-0.0287444	-0.0216025
-0.1162	0.00492791		0.00224327	0.00340863	0.00154291		-0.1162	0.00487857		0.0013097	0.00226236	0.00237419		-0.1162	-0.00647935		-0.0263785	-0.0275773	-0.018446		-0.1162	-0.0065022		-0.0093945	-0.0287403	-0.0216147
-0.116	0.00492004		0.00224488	0.00341365	0.00154282		-0.116	0.00487218		0.00130991	0.00226505	0.00236132		-0.116	-0.00648722		-0.0263769	-0.0275723	-0.018446		-0.116	-0.00650859		-0.00939429	-0.0287376	-0.0216275
-0.1158	0.00491133		0.00224642	0.00341893	0.00154259		-0.1158	0.00486198		0.00130928	0.00226714	0.00234883		-0.1158	-0.00649594		-0.0263754	-0.027567	-0.0184463		-0.1158	-0.00651879		-0.00939492	-0.0287355	-0.02164
-0.1156	0.00490185		0.00224806	0.0034254	0.00154139		-0.1156	0.00485399		0.00130885	0.00227114	0.00233782		-0.1156	-0.00650541		-0.0263737	-0.0275606	-0.0184475		-0.1156	-0.00652678		-0.00939534	-0.0287315	-0.021651
-0.1154	0.00489152		0.00225052	0.0034301	0.0015411		-0.1154	0.00484366		0.00130909	0.00227362	0.00232539		-0.1154	-0.00651574		-0.0263713	-0.0275559	-0.0184478		-0.1154	-0.00653711		-0.00939511	-0.028729	-0.0216635
-0.1152	0.00488249		0.00225309	0.003435	0.00154104		-0.1152	0.00483777		0.00130914	0.00227649	0.00231397		-0.1152	-0.00652477		-0.0263687	-0.027551	-0.0184478		-0.1152	-0.006543		-0.00939505	-0.0287262	-0.0216749
-0.115	0.00487589		0.00225725	0.00344059	0.00153959		-0.115	0.00482992		0.00130978	0.00228042	0.00230317		-0.115	-0.00653137		-0.0263645	-0.0275454	-0.0184493		-0.115	-0.00655086		-0.00939442	-0.0287222	-0.0216857
-0.1148	0.00487044		0.00226072	0.0034523	0.00153957		-0.1148	0.00482288		0.00130957	0.00228316	0.00229775		-0.1148	-0.00653682		-0.0263611	-0.0275337	-0.0184493		-0.1148	-0.00655789		-0.00939462	-0.0287195	-0.0216911
-0.1146	0.00486595		0.00226395	0.00346565	0.00153778		-0.1146	0.00481273		0.00131021	0.0022865	0.0022933		-0.1146	-0.00654131		-0.0263578	-0.0275203	-0.0184511		-0.1146	-0.00656804		-0.00939399	-0.0287162	-0.0216956
-0.1144	0.00486223		0.00226791	0.00347678	0.00153726		-0.1144	0.0048035		0.00130927	0.00229088	0.0022891		-0.1144	-0.00654503		-0.0263539	-0.0275092	-0.0184516		-0.1144	-0.00657727		-0.00939493	-0.0287118	-0.0216998
-0.1142	0.00485916		0.00227059	0.00348631	0.00153834		-0.1142	0.00479266		0.00130948	0.00229372	0.00228674		-0.1142	-0.00654811		-0.0263512	-0.0274997	-0.0184505		-0.1142	-0.00658811		-0.00939472	-0.0287089	-0.0217021
-0.114	0.00485837		0.00227453	0.00349424	0.0015375		-0.114	0.00478285		0.00130838	0.00229756	0.00228241		-0.114	-0.0065489		-0.0263472	-0.0274917	-0.0184514		-0.114	-0.00659792		-0.00939582	-0.0287051	-0.0217065
-0.1138	0.00485619		0.00227873	0.00349861	0.00153782		-0.1138	0.00477647		0.00130863	0.00229915	0.00227806		-0.1138	-0.00655108		-0.0263431	-0.0274874	-0.018451		-0.1138	-0.0066043		-0.00939556	-0.0287035	-0.0217108
-0.1136	0.0048531		0.00228148	0.0035053	0.00153726		-0.1136	0.00476769		0.00130816	0.00230073	0.00226896		-0.1136	-0.00655416		-0.0263403	-0.0274807	-0.0184516		-0.1136	-0.00661308		-0.00939603	-0.0287019	-0.0217199
-0.1134	0.00485083		0.00228362	0.0035131	0.00153828		-0.1134	0.00476511		0.00130804	0.00230215	0.00225938		-0.1134	-0.00655643		-0.0263382	-0.0274729	-0.0184506		-0.1134	-0.00661566		-0.00939616	-0.0287005	-0.0217295
-0.1132	0.0048473		0.00228597	0.0035199	0.00153797		-0.1132	0.00476082		0.00130886	0.00230468	0.00225063		-0.1132	-0.00655996		-0.0263358	-0.0274661	-0.0184509		-0.1132	-0.00661995		-0.00939534	-0.028698	-0.0217382
-0.113	0.00484274		0.00228815	0.00352766	0.00153825		-0.113	0.00475888		0.0013098	0.00230756	0.00224402		-0.113	-0.00656452		-0.0263336	-0.0274583	-0.0184506		-0.113	-0.00662189		-0.0093944	-0.0286951	-0.0217448
-0.1128	0.00483728		0.00228709	0.00353362	0.00153984		-0.1128	0.00475594		0.00130914	0.00230879	0.00223991		-0.1128	-0.00656998		-0.0263347	-0.0274523	-0.018449		-0.1128	-0.00662483		-0.00939506	-0.0286939	-0.021749
-0.1126	0.00482832		0.00228463	0.00354053	0.0015433		-0.1126	0.00475281		0.00130806	0.00231189	0.00223823		-0.1126	-0.00657894		-0.0263371	-0.0274454	-0.0184456		-0.1126	-0.00662796		-0.00939614	-0.0286908	-0.0217506
-0.1124	0.00481653		0.00228749	0.00354602	0.00154539		-0.1124	0.00475201		0.00130857	0.0023147	0.00223861		-0.1124	-0.00659074		-0.0263343	-0.0274399	-0.0184435		-0.1124	-0.00662876		-0.00939563	-0.028688	-0.0217503
-0.1122	0.00480309		0.00228984	0.00355185	0.00154576		-0.1122	0.00475136		0.00130879	0.00231694	0.00223985		-0.1122	-0.00660417		-0.0263319	-0.0274341	-0.0184431		-0.1122	-0.00662941		-0.00939541	-0.0286857	-0.021749
-0.112	0.00478933		0.00229068	0.00355865	0.00154842		-0.112	0.00475077		0.00130794	0.00231844	0.00224074		-0.112	-0.00661793		-0.0263311	-0.0274273	-0.0184404		-0.112	-0.00663		-0.00939626	-0.0286842	-0.0217481
-0.1118	0.00477312		0.00229343	0.00356502	0.00154907		-0.1118	0.00474791		0.00130622	0.00232107	0.00224147		-0.1118	-0.00663414		-0.0263283	-0.0274209	-0.0184398		-0.1118	-0.00663286		-0.00939797	-0.0286816	-0.0217474
-0.1116	0.00475683		0.002295	0.00357159	0.00154986		-0.1116	0.00474119		0.00130602	0.00232197	0.00224107		-0.1116	-0.00665043		-0.0263268	-0.0274144	-0.018439		-0.1116	-0.00663958		-0.00939818	-0.0286807	-0.0217478
-0.1114	0.0047417		0.00229657	0.00357651	0.00155296		-0.1114	0.00473201		0.00130514	0.00232445	0.0022382		-0.1114	-0.00666556		-0.0263252	-0.0274095	-0.0184359		-0.1114	-0.00664876		-0.00939906	-0.0286782	-0.0217507
-0.1112	0.00472288		0.00229772	0.00358291	0.00155246		-0.1112	0.0047204		0.00130412	0.00232685	0.00223756		-0.1112	-0.00668438		-0.0263241	-0.0274031	-0.0184364		-0.1112	-0.00666037		-0.00940008	-0.0286758	-0.0217513
-0.111	0.00470385		0.00230059	0.00358986	0.00155525		-0.111	0.0047076		0.00130175	0.00232889	0.00223462		-0.111	-0.00670341		-0.0263212	-0.0273961	-0.0184336		-0.111	-0.00667317		-0.00940245	-0.0286738	-0.0217542
-0.1108	0.00468392		0.00230242	0.00359798	0.00155767		-0.1108	0.00469169		0.001302	0.00233047	0.00223193		-0.1108	-0.00672334		-0.0263194	-0.027388	-0.0184312		-0.1108	-0.00668908		-0.0094022	-0.0286722	-0.0217569
-0.1106	0.00466833		0.00230545	0.00360834	0.0015587		-0.1106	0.00467412		0.00130221	0.00233172	0.00222895		-0.1106	-0.00673893		-0.0263163	-0.0273776	-0.0184302		-0.1106	-0.00670665		-0.00940199	-0.0286709	-0.0217599
-0.1104	0.00465623		0.00231114	0.00361586	0.00156042		-0.1104	0.00465346		0.00130237	0.00233218	0.00222554		-0.1104	-0.00675103		-0.0263106	-0.0273701	-0.0184284		-0.1104	-0.00672731		-0.00940183	-0.0286705	-0.0217633
-0.1102	0.00464902		0.00231575	0.00362465	0.0015626		-0.1102	0.00463573		0.00130126	0.00233229	0.002223		-0.1102	-0.00675824		-0.026306	-0.0273613	-0.0184263		-0.1102	-0.00674504		-0.00940294	-0.0286704	-0.0217659
-0.11	0.00464397		0.00232242	0.00362992	0.00156416		-0.11	0.00461869		0.00130032	0.00233385	0.00221804		-0.11	-0.00676329		-0.0262994	-0.027356	-0.0184247		-0.11	-0.00676208		-0.00940388	-0.0286688	-0.0217708
-0.1098	0.00463703		0.00232994	0.00363268	0.0015657		-0.1098	0.00459853		0.00130141	0.00233542	0.00221321		-0.1098	-0.00677024		-0.0262918	-0.0273533	-0.0184232		-0.1098	-0.00678224		-0.00940279	-0.0286672	-0.0217757
-0.1096	0.00462679		0.00233726	0.00363427	0.00156846		-0.1096	0.00457869		0.00130231	0.00233647	0.00220619		-0.1096	-0.00678047		-0.0262845	-0.0273517	-0.0184204		-0.1096	-0.00680208		-0.00940188	-0.0286662	-0.0217827
-0.1094	0.00461564		0.00234616	0.00363527	0.00157373		-0.1094	0.00455942		0.00130277	0.0023386	0.00220221		-0.1094	-0.00679162		-0.0262756	-0.0273507	-0.0184151		-0.1094	-0.00682135		-0.00940142	-0.0286641	-0.0217867
-0.1092	0.00460068		0.00235423	0.0036373	0.00157688		-0.1092	0.00454399		0.00130402	0.00233781	0.00219942		-0.1092	-0.00680658		-0.0262676	-0.0273487	-0.018412		-0.1092	-0.00683678		-0.00940018	-0.0286649	-0.0217894
-0.109	0.00458482		0.00236201	0.00364412	0.00157974		-0.109	0.00453387		0.00130215	0.00233923	0.00220034		-0.109	-0.00682244		-0.0262598	-0.0273418	-0.0184091		-0.109	-0.0068469		-0.00940205	-0.0286634	-0.0217885
-0.1088	0.00456862		0.00237104	0.0036507	0.00158226		-0.1088	0.00452712		0.00130203	0.00234076	0.00220201		-0.1088	-0.00683865		-0.0262507	-0.0273353	-0.0184066		-0.1088	-0.00685365		-0.00940217	-0.0286619	-0.0217869
-0.1086	0.00455002		0.00237581	0.00365766	0.00158293		-0.1086	0.00452431		0.00130082	0.00234199	0.00220249		-0.1086	-0.00685724		-0.026246	-0.0273283	-0.0184059		-0.1086	-0.00685646		-0.00940338	-0.0286607	-0.0217864
-0.1084	0.00452982		0.00237945	0.00366936	0.00158617		-0.1084	0.00451829		0.0013004	0.00234366	0.00220235		-0.1084	-0.00687744		-0.0262423	-0.0273166	-0.0184027		-0.1084	-0.00686248		-0.0094038	-0.028659	-0.0217865
-0.1082	0.00450751		0.00238223	0.0036797	0.00158721		-0.1082	0.00451184		0.00130218	0.00234514	0.00220483		-0.1082	-0.00689975		-0.0262395	-0.0273063	-0.0184017		-0.1082	-0.00686893		-0.00940202	-0.0286575	-0.021784
-0.108	0.00448635		0.00238386	0.00368982	0.00158879		-0.108	0.00450642		0.00130173	0.00234534	0.00220867		-0.108	-0.00692091		-0.0262379	-0.0272961	-0.0184001		-0.108	-0.00687436		-0.00940247	-0.0286573	-0.0217802
-0.1078	0.00446545		0.00238546	0.00368907	0.00159093		-0.1078	0.00450058		0.0013013	0.00234669	0.00221068		-0.1078	-0.00694181		-0.0262363	-0.0272969	-0.0183979		-0.1078	-0.00688019		-0.0094029	-0.028656	-0.0217782
-0.1076	0.00444313		0.00238823	0.0036986	0.00159145		-0.1076	0.0044934		0.00130009	0.00234912	0.00221333		-0.1076	-0.00696413		-0.0262335	-0.0272874	-0.0183974		-0.1076	-0.00688737		-0.00940411	-0.0286535	-0.0217755
-0.1074	0.00442337		0.00239198	0.00370971	0.00159419		-0.1074	0.00448146		0.00130231	0.00235121	0.0022159		-0.1074	-0.00698389		-0.0262298	-0.0272763	-0.0183947		-0.1074	-0.00689931		-0.00940189	-0.0286515	-0.021773
-0.1072	0.00440626		0.0023961	0.00371644	0.00159598		-0.1072	0.00447175		0.00130368	0.00235329	0.00221805		-0.1072	-0.007001		-0.0262257	-0.0272695	-0.0183929		-0.1072	-0.00690902		-0.00940052	-0.0286494	-0.0217708
-0.107	0.00438971		0.00239923	0.00371685	0.00159674		-0.107	0.0044604		0.00130563	0.00235544	0.00222065		-0.107	-0.00701755		-0.0262225	-0.0272691	-0.0183921		-0.107	-0.00692037		-0.00939857	-0.0286472	-0.0217682
-0.1068	0.00437372		0.00240612	0.0037191	0.00159884		-0.1068	0.00444664		0.00130639	0.00235834	0.00222208		-0.1068	-0.00703354		-0.0262157	-0.0272669	-0.01839		-0.1068	-0.00693413		-0.00939781	-0.0286443	-0.0217668
-0.1066	0.00435921		0.0024119	0.00372225	0.00160043		-0.1066	0.00443388		0.00130769	0.00236339	0.00222458		-0.1066	-0.00704805		-0.0262099	-0.0272637	-0.0183884		-0.1066	-0.00694689		-0.00939651	-0.0286393	-0.0217643
-0.1064	0.00434853		0.00241724	0.00372659	0.00160181		-0.1064	0.00442154		0.00130879	0.00236626	0.00222556		-0.1064	-0.00705873		-0.0262045	-0.0272594	-0.018387		-0.1064	-0.00695923		-0.00939541	-0.0286364	-0.0217633
-0.1062	0.00433866		0.00242316	0.00373046	0.00160291		-0.1062	0.00440858		0.00130904	0.00236699	0.00222647		-0.1062	-0.0070686		-0.0261986	-0.0272555	-0.018386		-0.1062	-0.00697219		-0.00939516	-0.0286357	-0.0217624
-0.106	0.00432992		0.00242614	0.0037345	0.00160572		-0.106	0.00439496		0.00130854	0.00236867	0.00222874		-0.106	-0.00707734		-0.0261956	-0.0272515	-0.0183831		-0.106	-0.00698581		-0.00939566	-0.028634	-0.0217601
-0.1058	0.00432197		0.00243065	0.00373683	0.00160771		-0.1058	0.00438254		0.00130878	0.00237039	0.00222979		-0.1058	-0.00708529		-0.0261911	-0.0272491	-0.0183811		-0.1058	-0.00699823		-0.00939542	-0.0286323	-0.0217591
-0.1056	0.00431522		0.00243355	0.00374138	0.00160982		-0.1056	0.00437194		0.00130735	0.00237209	0.00223127		-0.1056	-0.00709204		-0.0261882	-0.0272446	-0.018379		-0.1056	-0.00700883		-0.00939684	-0.0286306	-0.0217576
-0.1054	0.004308		0.00243895	0.00374061	0.00161116		-0.1054	0.00436279		0.00130944	0.00237639	0.00223291		-0.1054	-0.00709926		-0.0261828	-0.0272454	-0.0183777		-0.1054	-0.00701798		-0.00939476	-0.0286263	-0.021756
-0.1052	0.00429875		0.00244353	0.00374175	0.00161153		-0.1052	0.00435128		0.00130994	0.00237998	0.00223441		-0.1052	-0.00710851		-0.0261783	-0.0272442	-0.0183773		-0.1052	-0.00702949		-0.00939425	-0.0286227	-0.0217545
-0.105	0.0042886		0.00244565	0.00374238	0.00161467		-0.105	0.00434244		0.00130989	0.00238265	0.00223451		-0.105	-0.00711866		-0.0261761	-0.0272436	-0.0183742		-0.105	-0.00703833		-0.00939431	-0.02862	-0.0217544
-0.1048	0.00427984		0.0024487	0.00374405	0.00161696		-0.1048	0.00433563		0.00131016	0.00238478	0.00223289		-0.1048	-0.00712742		-0.0261731	-0.0272419	-0.0183719		-0.1048	-0.00704514		-0.00939404	-0.0286179	-0.021756
-0.1046	0.00427083		0.00245187	0.00374614	0.00161846		-0.1046	0.00432886		0.00130964	0.00238704	0.00223182		-0.1046	-0.00713643		-0.0261699	-0.0272398	-0.0183704		-0.1046	-0.00705191		-0.00939456	-0.0286156	-0.021757
-0.1044	0.0042622		0.00245431	0.0037492	0.00161948		-0.1044	0.00432485		0.00130937	0.0023902	0.00223099		-0.1044	-0.00714506		-0.0261675	-0.0272368	-0.0183694		-0.1044	-0.00705592		-0.00939483	-0.0286125	-0.0217579
-0.1042	0.00425248		0.00245637	0.00375143	0.00162164		-0.1042	0.00432222		0.00131045	0.0023923	0.00222844		-0.1042	-0.00715478		-0.0261654	-0.0272345	-0.0183672		-0.1042	-0.00705855		-0.00939374	-0.0286104	-0.0217604
-0.104	0.00424373		0.00245618	0.00375513	0.00162067		-0.104	0.00431769		0.00131197	0.00239286	0.00222523		-0.104	-0.00716353		-0.0261656	-0.0272308	-0.0183682		-0.104	-0.00706309		-0.00939223	-0.0286098	-0.0217636
-0.1038	0.00423326		0.00246022	0.00376004	0.0016237		-0.1038	0.00431098		0.0013108	0.00239623	0.00221998		-0.1038	-0.007174		-0.0261616	-0.0272259	-0.0183652		-0.1038	-0.00706979		-0.0093934	-0.0286064	-0.0217689
-0.1036	0.0042248		0.00246163	0.00376548	0.00162654		-0.1036	0.00430481		0.0013112	0.0024008	0.00221561		-0.1036	-0.00718246		-0.0261601	-0.0272205	-0.0183623		-0.1036	-0.00707596		-0.009393	-0.0286019	-0.0217733
-0.1034	0.0042149		0.00246236	0.00376937	0.00162927		-0.1034	0.00429978		0.00131022	0.00240485	0.00221221		-0.1034	-0.00719236		-0.0261594	-0.0272166	-0.0183596		-0.1034	-0.00708099		-0.00939397	-0.0285978	-0.0217767
-0.1032	0.00420536		0.00246192	0.00378206	0.00163199		-0.1032	0.0042937		0.00130951	0.00240984	0.00220749		-0.1032	-0.0072019		-0.0261599	-0.0272039	-0.0183569		-0.1032	-0.00708707		-0.00939469	-0.0285928	-0.0217814
-0.103	0.00419538		0.00246265	0.00379913	0.00163435		-0.103	0.00428499		0.00131062	0.0024196	0.00220217		-0.103	-0.00721188		-0.0261591	-0.0271868	-0.0183545		-0.103	-0.00709578		-0.00939358	-0.0285831	-0.0217867
-0.1028	0.00418534		0.00246104	0.00381447	0.00163769		-0.1028	0.00427799		0.00131027	0.00242891	0.00219611		-0.1028	-0.00722192		-0.0261607	-0.0271715	-0.0183512		-0.1028	-0.00710278		-0.00939393	-0.0285738	-0.0217928
-0.1026	0.00417371		0.00246091	0.00382441	0.00163987		-0.1026	0.00427003		0.00130929	0.00243756	0.00219027		-0.1026	-0.00723356		-0.0261609	-0.0271616	-0.018349		-0.1026	-0.00711075		-0.00939491	-0.0285651	-0.0217986
-0.1024	0.00416302		0.00246191	0.00382805	0.00164248		-0.1024	0.0042608		0.00130844	0.00244548	0.00218435		-0.1024	-0.00724424		-0.0261599	-0.0271579	-0.0183464		-0.1024	-0.00711998		-0.00939576	-0.0285572	-0.0218045
-0.1022	0.00415297		0.00246482	0.00383354	0.00164724		-0.1022	0.00425327		0.00130876	0.00244863	0.00217536		-0.1022	-0.0072543		-0.026157	-0.0271524	-0.0183416		-0.1022	-0.00712751		-0.00939544	-0.028554	-0.0218135
-0.102	0.00414119		0.00246629	0.00384182	0.00164893		-0.102	0.00424403		0.00130977	0.00245116	0.00216904		-0.102	-0.00726607		-0.0261555	-0.0271441	-0.0183399		-0.102	-0.00713675		-0.00939443	-0.0285515	-0.0218198
-0.1018	0.00413169		0.00246794	0.00385265	0.00165115		-0.1018	0.004236		0.0013089	0.00245186	0.0021615		-0.1018	-0.00727557		-0.0261538	-0.0271333	-0.0183377		-0.1018	-0.00714477		-0.0093953	-0.0285508	-0.0218274
-0.1016	0.00412245		0.00246932	0.00386355	0.00165296		-0.1016	0.00422791		0.00130863	0.00245213	0.0021516		-0.1016	-0.00728481		-0.0261525	-0.0271224	-0.0183359		-0.1016	-0.00715286		-0.00939557	-0.0285505	-0.0218373
-0.1014	0.00411053		0.00246958	0.00387512	0.00165774		-0.1014	0.00422025		0.00130757	0.0024537	0.00214235		-0.1014	-0.00729673		-0.0261522	-0.0271108	-0.0183311		-0.1014	-0.00716052		-0.00939663	-0.028549	-0.0218465
-0.1012	0.00409978		0.00247146	0.00388215	0.00166172		-0.1012	0.00421145		0.00130841	0.0024566	0.00213244		-0.1012	-0.00730748		-0.0261503	-0.0271038	-0.0183271		-0.1012	-0.00716932		-0.00939578	-0.0285461	-0.0218564
-0.101	0.00408865		0.00247274	0.0038961	0.00166673		-0.101	0.00420338		0.00130864	0.00245997	0.00212256		-0.101	-0.00731862		-0.026149	-0.0270899	-0.0183221		-0.101	-0.00717739		-0.00939556	-0.0285427	-0.0218663
-0.1008	0.00407704		0.00247442	0.00391308	0.00166901		-0.1008	0.00419565		0.00130968	0.00246452	0.00210996		-0.1008	-0.00733022		-0.0261474	-0.0270729	-0.0183198		-0.1008	-0.00718512		-0.00939451	-0.0285381	-0.0218789
-0.1006	0.00406626		0.00247571	0.00393185	0.00167311		-0.1006	0.00418763		0.0013098	0.00246763	0.00210036		-0.1006	-0.007341		-0.0261461	-0.0270541	-0.0183158		-0.1006	-0.00719314		-0.0093944	-0.028535	-0.0218885
-0.1004	0.00405544		0.00247683	0.00394624	0.0016782		-0.1004	0.00418151		0.0013103	0.00247145	0.00209124		-0.1004	-0.00735182		-0.0261449	-0.0270397	-0.0183107		-0.1004	-0.00719926		-0.0093939	-0.0285312	-0.0218976
-0.1002	0.0040454		0.00247908	0.00395349	0.00168251		-0.1002	0.00417486		0.00130773	0.00247435	0.00208311		-0.1002	-0.00736187		-0.0261427	-0.0270325	-0.0183063		-0.1002	-0.00720591		-0.00939647	-0.0285283	-0.0219058
-0.1	0.00403468		0.00248046	0.00395678	0.00168623		-0.1	0.0041714		0.00130652	0.00247541	0.00207667		-0.1	-0.00737258		-0.0261413	-0.0270292	-0.0183026		-0.1	-0.00720937		-0.00939768	-0.0285273	-0.0219122
-0.0998	0.00402732		0.0024807	0.00396006	0.00168982		-0.0998	0.00416532		0.00130553	0.00247966	0.0020649		-0.0998	-0.00737995		-0.0261411	-0.0270259	-0.018299		-0.0998	-0.00721545		-0.00939867	-0.028523	-0.021924
-0.0996	0.00402288		0.00248106	0.00396495	0.00169562		-0.0996	0.00416132		0.00130398	0.00248244	0.00205607		-0.0996	-0.00738438		-0.0261407	-0.027021	-0.0182932		-0.0996	-0.00721945		-0.00940022	-0.0285202	-0.0219328
-0.0994	0.00401778		0.00248046	0.0039705	0.00170056		-0.0994	0.00415708		0.00130369	0.00248621	0.00204714		-0.0994	-0.00738948		-0.0261413	-0.0270155	-0.0182883		-0.0994	-0.0072237		-0.00940051	-0.0285165	-0.0219417
-0.0992	0.0040102		0.00248111	0.00397675	0.00170647		-0.0992	0.00415352		0.00130427	0.00249067	0.00203582		-0.0992	-0.00739706		-0.0261407	-0.0270092	-0.0182824		-0.0992	-0.00722725		-0.00939993	-0.028512	-0.021953
-0.099	0.00399753		0.00248211	0.00398347	0.00171174		-0.099	0.00415135		0.00130422	0.00249419	0.00202663		-0.099	-0.00740974		-0.0261397	-0.0270025	-0.0182771		-0.099	-0.00722942		-0.00939998	-0.0285085	-0.0219622
-0.0988	0.00398502		0.00248368	0.00398843	0.00171715		-0.0988	0.00414932		0.00130476	0.00250101	0.00201689		-0.0988	-0.00742225		-0.0261381	-0.0269975	-0.0182717		-0.0988	-0.00723145		-0.00939944	-0.0285017	-0.021972
-0.0986	0.00397156		0.00248313	0.00399353	0.00172219		-0.0986	0.00414915		0.00130433	0.00250758	0.00200736		-0.0986	-0.0074357		-0.0261387	-0.0269924	-0.0182667		-0.0986	-0.00723162		-0.00939987	-0.0284951	-0.0219815
-0.0984	0.00395941		0.00248671	0.00399714	0.00172661		-0.0984	0.00414896		0.00130522	0.00251563	0.00199917		-0.0984	-0.00744785		-0.0261351	-0.0269888	-0.0182623		-0.0984	-0.00723181		-0.00939897	-0.028487	-0.0219897
-0.0982	0.00394404		0.00248774	0.00400235	0.00172952		-0.0982	0.00415085		0.00130516	0.00252317	0.00198927		-0.0982	-0.00746322		-0.026134	-0.0269836	-0.0182593		-0.0982	-0.00722992		-0.00939904	-0.0284795	-0.0219996
-0.098	0.00392674		0.00248757	0.00400681	0.00173398		-0.098	0.00415208		0.00130427	0.00253029	0.00197861		-0.098	-0.00748052		-0.0261342	-0.0269792	-0.0182549		-0.098	-0.00722869		-0.00939993	-0.0284724	-0.0220103
-0.0978	0.00391017		0.00248827	0.00400958	0.00173713		-0.0978	0.00415612		0.00130414	0.00253872	0.00196847		-0.0978	-0.00749709		-0.0261335	-0.0269764	-0.0182517		-0.0978	-0.00722465		-0.00940006	-0.028464	-0.0220204
-0.0976	0.00389776		0.00249202	0.00401263	0.00174155		-0.0976	0.00416125		0.00130321	0.00254798	0.00195965		-0.0976	-0.0075095		-0.0261298	-0.0269733	-0.0182473		-0.0976	-0.00721952		-0.00940098	-0.0284547	-0.0220292
-0.0974	0.00388518		0.0025008	0.00401326	0.00174528		-0.0974	0.00416441		0.00130319	0.00255632	0.00194951		-0.0974	-0.00752208		-0.026121	-0.0269727	-0.0182436		-0.0974	-0.00721636		-0.009401	-0.0284463	-0.0220394
-0.0972	0.00387347		0.00251255	0.00401742	0.00174886		-0.0972	0.00416386		0.00130314	0.00256696	0.00193913		-0.0972	-0.0075338		-0.0261092	-0.0269685	-0.01824		-0.0972	-0.00721691		-0.00940106	-0.0284357	-0.0220497
-0.097	0.0038647		0.0025201	0.00402504	0.0017527		-0.097	0.00416436		0.0013054	0.00257438	0.00193312		-0.097	-0.00754256		-0.0261017	-0.0269609	-0.0182362		-0.097	-0.00721641		-0.0093988	-0.0284283	-0.0220557
-0.0968	0.00385705		0.00252883	0.00403632	0.00175803		-0.0968	0.00416807		0.00130696	0.00258375	0.00192423		-0.0968	-0.00755021		-0.0260929	-0.0269496	-0.0182308		-0.0968	-0.00721271		-0.00939724	-0.0284189	-0.0220646
-0.0966	0.00384936		0.00256473	0.00404265	0.00176197		-0.0966	0.00417317		0.00130629	0.00259495	0.0019191		-0.0966	-0.00755791		-0.0260571	-0.0269433	-0.0182269		-0.0966	-0.0072076		-0.0093979	-0.0284077	-0.0220698
-0.0964	0.00383966		0.00260824	0.00404692	0.00176855		-0.0964	0.004179		0.00130503	0.00260335	0.00191551		-0.0964	-0.0075676		-0.0260135	-0.026939	-0.0182203		-0.0964	-0.00720178		-0.00939917	-0.0283993	-0.0220734
-0.0962	0.0038296		0.00265245	0.00405232	0.00177554		-0.0962	0.0041805		0.00130446	0.00261376	0.0019105		-0.0962	-0.00757766		-0.0259693	-0.0269336	-0.0182133		-0.0962	-0.00720027		-0.00939974	-0.0283889	-0.0220784
-0.096	0.00381868		0.00268319	0.00405329	0.0017827		-0.096	0.00418267		0.00130151	0.00262171	0.00190758		-0.096	-0.00758859		-0.0259386	-0.0269327	-0.0182062		-0.096	-0.0071981		-0.00940268	-0.028381	-0.0220813
-0.0958	0.00380758		0.00269172	0.00405933	0.00179192		-0.0958	0.00418468		0.00130145	0.00263042	0.00190804		-0.0958	-0.00759968		-0.0259301	-0.0269266	-0.0181969		-0.0958	-0.00719609		-0.00940275	-0.0283722	-0.0220808
-0.0956	0.00379629		0.00271312	0.00406371	0.00180086		-0.0956	0.00418767		0.00130131	0.00263935	0.00191025		-0.0956	-0.00761097		-0.0259087	-0.0269222	-0.018188		-0.0956	-0.0071931		-0.00940289	-0.0283633	-0.0220786
-0.0954	0.00378466		0.00275243	0.00406147	0.00180894		-0.0954	0.0041915		0.00130118	0.00264889	0.00191261		-0.0954	-0.0076226		-0.0258693	-0.0269245	-0.0181799		-0.0954	-0.00718927		-0.00940301	-0.0283538	-0.0220763
-0.0952	0.00377262		0.00280066	0.00406524	0.00181746		-0.0952	0.00419132		0.0013018	0.00266097	0.00191705		-0.0952	-0.00763465		-0.0258211	-0.0269207	-0.0181714		-0.0952	-0.00718945		-0.0094024	-0.0283417	-0.0220718
-0.095	0.00376056		0.002855	0.00407085	0.0018296		-0.095	0.00418942		0.00130254	0.00267139	0.00192196		-0.095	-0.00764671		-0.0257668	-0.0269151	-0.0181593		-0.095	-0.00719135		-0.00940166	-0.0283313	-0.0220669
-0.0948	0.00374945		0.00290316	0.00407559	0.00184036		-0.0948	0.00418791		0.00130263	0.00268119	0.00192871		-0.0948	-0.00765781		-0.0257186	-0.0269104	-0.0181485		-0.0948	-0.00719286		-0.00940157	-0.0283215	-0.0220602
-0.0946	0.00373492		0.00293447	0.00407986	0.0018527		-0.0946	0.0041868		0.001302	0.00268992	0.00193776		-0.0946	-0.00767235		-0.0256873	-0.0269061	-0.0181362		-0.0946	-0.00719397		-0.0094022	-0.0283128	-0.0220511
-0.0944	0.00372151		0.00295197	0.00408332	0.00186544		-0.0944	0.00418965		0.00130181	0.00269835	0.00194802		-0.0944	-0.00768575		-0.0256698	-0.0269026	-0.0181234		-0.0944	-0.00719112		-0.00940239	-0.0283043	-0.0220408
-0.0942	0.00370588		0.00295196	0.0040848	0.00187828		-0.0942	0.0041915		0.0013017	0.00270915	0.00196002		-0.0942	-0.00770138		-0.0256698	-0.0269012	-0.0181106		-0.0942	-0.00718928		-0.0094025	-0.0282935	-0.0220288
-0.094	0.00369036		0.00296436	0.00408669	0.00189196		-0.094	0.00419154		0.0013029	0.0027178	0.00197352		-0.094	-0.0077169		-0.0256574	-0.0268993	-0.0180969		-0.094	-0.00718923		-0.0094013	-0.0282849	-0.0220153
-0.0938	0.00367513		0.00298217	0.00408774	0.00190589		-0.0938	0.00419131		0.00130241	0.00272774	0.00199007		-0.0938	-0.00773213		-0.0256396	-0.0268982	-0.018083		-0.0938	-0.00718946		-0.00940179	-0.0282749	-0.0219988
-0.0936	0.0036629		0.0030014	0.00408672	0.00192277		-0.0936	0.00419134		0.00130255	0.00273811	0.00200799		-0.0936	-0.00774436		-0.0256204	-0.0268992	-0.0180661		-0.0936	-0.00718943		-0.00940165	-0.0282646	-0.0219809
-0.0934	0.00365161		0.00301434	0.004088	0.00193959		-0.0934	0.00419854		0.00130263	0.00274513	0.00202741		-0.0934	-0.00775565		-0.0256074	-0.026898	-0.0180493		-0.0934	-0.00718223		-0.00940157	-0.0282575	-0.0219615
-0.0932	0.00364197		0.00302437	0.00408722	0.00195486		-0.0932	0.00420552		0.00130357	0.00275102	0.00204709		-0.0932	-0.00776529		-0.0255974	-0.0268987	-0.018034		-0.0932	-0.00717525		-0.00940063	-0.0282516	-0.0219418
-0.093	0.00363221		0.00302881	0.0040862	0.00197468		-0.093	0.00421257		0.0013023	0.0027575	0.00206791		-0.093	-0.00777505		-0.025593	-0.0268998	-0.0180142		-0.093	-0.0071682		-0.00940189	-0.0282452	-0.021921
-0.0928	0.00362316		0.00303076	0.00408449	0.00199329		-0.0928	0.00421665		0.0013016	0.00276087	0.00208328		-0.0928	-0.0077841		-0.025591	-0.0269015	-0.0179956		-0.0928	-0.00716412		-0.00940259	-0.0282418	-0.0219056
-0.0926	0.003617		0.00303313	0.00408437	0.00201051		-0.0926	0.00421522		0.00130131	0.00276598	0.00210058		-0.0926	-0.00779026		-0.0255887	-0.0269016	-0.0179784		-0.0926	-0.00716555		-0.00940289	-0.0282367	-0.0218883
-0.0924	0.00361192		0.00303958	0.00408403	0.0020269		-0.0924	0.00421798		0.00129927	0.00277067	0.00211763		-0.0924	-0.00779534		-0.0255822	-0.0269019	-0.017962		-0.0924	-0.00716279		-0.00940493	-0.028232	-0.0218712
-0.0922	0.00360732		0.00304986	0.00408478	0.00204332		-0.0922	0.00422284		0.00129995	0.00277471	0.00213256		-0.0922	-0.00779995		-0.0255719	-0.0269012	-0.0179455		-0.0922	-0.00715793		-0.00940425	-0.028228	-0.0218563
-0.092	0.00360189		0.00306274	0.00408679	0.00206278		-0.092	0.00422913		0.00129842	0.00277929	0.00215216		-0.092	-0.00780537		-0.025559	-0.0268992	-0.0179261		-0.092	-0.00715164		-0.00940578	-0.0282234	-0.0218367
-0.0918	0.00359556		0.00307696	0.00408854	0.00207939		-0.0918	0.00423225		0.00129891	0.0027829	0.00216853		-0.0918	-0.0078117		-0.0255448	-0.0268974	-0.0179095		-0.0918	-0.00714852		-0.00940529	-0.0282198	-0.0218203
-0.0916	0.00358944		0.00308924	0.00409025	0.0020945		-0.0916	0.00423346		0.00129875	0.00278778	0.0021815		-0.0916	-0.00781782		-0.0255325	-0.0268957	-0.0178944		-0.0916	-0.00714731		-0.00940545	-0.0282149	-0.0218074
-0.0914	0.00358077		0.00309737	0.00409064	0.00210882		-0.0914	0.00423714		0.00129966	0.00279128	0.00219726		-0.0914	-0.00782649		-0.0255244	-0.0268953	-0.01788		-0.0914	-0.00714363		-0.00940454	-0.0282114	-0.0217916
-0.0912	0.00357127		0.00309971	0.00408994	0.00212426		-0.0912	0.00424103		0.00129931	0.00279505	0.00221504		-0.0912	-0.00783599		-0.0255221	-0.026896	-0.0178646		-0.0912	-0.00713975		-0.00940489	-0.0282076	-0.0217738
-0.091	0.00356307		0.00310105	0.00409139	0.00213845		-0.091	0.00424353		0.00129853	0.00279776	0.00223333		-0.091	-0.00784419		-0.0255207	-0.0268946	-0.0178504		-0.091	-0.00713724		-0.00940567	-0.0282049	-0.0217555
-0.0908	0.00355535		0.00310354	0.00409229	0.00215504		-0.0908	0.00424767		0.00129922	0.00280379	0.00224981		-0.0908	-0.00785191		-0.0255182	-0.0268937	-0.0178338		-0.0908	-0.00713311		-0.00940497	-0.0281989	-0.0217391
-0.0906	0.00354743		0.00310809	0.00409914	0.00217035		-0.0906	0.00425171		0.00130053	0.00280895	0.00226628		-0.0906	-0.00785984		-0.0255137	-0.0268868	-0.0178185		-0.0906	-0.00712906		-0.00940367	-0.0281937	-0.0217226
-0.0904	0.00353917		0.00311508	0.00410101	0.00218646		-0.0904	0.00425667		0.0013013	0.00281487	0.00228084		-0.0904	-0.00786809		-0.0255067	-0.0268849	-0.0178024		-0.0904	-0.0071241		-0.0094029	-0.0281878	-0.021708
-0.0902	0.0035311		0.0031272	0.00410511	0.00220031		-0.0902	0.004263		0.00130098	0.00282218	0.00229439		-0.0902	-0.00787616		-0.0254946	-0.0268809	-0.0177885		-0.0902	-0.00711777		-0.00940321	-0.0281805	-0.0216945
-0.09	0.00352517		0.00313905	0.00410752	0.00221537		-0.09	0.0042701		0.00130204	0.00283323	0.00230768		-0.09	-0.0078821		-0.0254827	-0.0268784	-0.0177735		-0.09	-0.00711067		-0.00940216	-0.0281694	-0.0216812
-0.0898	0.00351661		0.0031417	0.00411059	0.00223034		-0.0898	0.00427888		0.0013019	0.00284881	0.00231787		-0.0898	-0.00789065		-0.0254801	-0.0268754	-0.0177585		-0.0898	-0.00710189		-0.0094023	-0.0281539	-0.021671
-0.0896	0.00351084		0.00314537	0.00411112	0.00224329		-0.0896	0.00428499		0.00130072	0.00285778	0.0023257		-0.0896	-0.00789642		-0.0254764	-0.0268748	-0.0177456		-0.0896	-0.00709578		-0.00940347	-0.0281449	-0.0216632
-0.0894	0.00350484		0.00315454	0.00411644	0.00225884		-0.0894	0.00429144		0.00130044	0.00286061	0.0023321		-0.0894	-0.00790242		-0.0254672	-0.0268695	-0.01773		-0.0894	-0.00708933		-0.00940376	-0.0281421	-0.0216568
-0.0892	0.00349923		0.00317016	0.00412204	0.00227144		-0.0892	0.0042974		0.00130033	0.00286907	0.00233862		-0.0892	-0.00790803		-0.0254516	-0.0268639	-0.0177174		-0.0892	-0.00708337		-0.00940387	-0.0281336	-0.0216502
-0.089	0.00349452		0.00319114	0.00412613	0.00228402		-0.089	0.00430354		0.00130096	0.00287263	0.00234172		-0.089	-0.00791275		-0.0254306	-0.0268598	-0.0177048		-0.089	-0.00707723		-0.00940323	-0.02813	-0.0216471
-0.0888	0.00349024		0.00320186	0.00413052	0.00229769		-0.0888	0.00430803		0.00130138	0.00288295	0.00234566		-0.0888	-0.00791703		-0.0254199	-0.0268554	-0.0176912		-0.0888	-0.00707274		-0.00940282	-0.0281197	-0.0216432
-0.0886	0.00348701		0.00320383	0.00413286	0.00230945		-0.0886	0.00430795		0.00130328	0.00289415	0.00234537		-0.0886	-0.00792025		-0.0254179	-0.0268531	-0.0176794		-0.0886	-0.00707282		-0.00940091	-0.0281085	-0.0216435
-0.0884	0.00348533		0.00321409	0.0041394	0.00231997		-0.0884	0.00431114		0.0013042	0.00289652	0.00234184		-0.0884	-0.00792193		-0.0254077	-0.0268466	-0.0176689		-0.0884	-0.00706963		-0.0094	-0.0281061	-0.021647
-0.0882	0.0034833		0.00322726	0.00414224	0.00232574		-0.0882	0.00431258		0.00130462	0.0029022	0.00233863		-0.0882	-0.00792396		-0.0253945	-0.0268437	-0.0176631		-0.0882	-0.00706819		-0.00939957	-0.0281005	-0.0216502
-0.088	0.00348137		0.00324896	0.00414865	0.00233383		-0.088	0.00431265		0.0013051	0.0029144	0.00233455		-0.088	-0.00792589		-0.0253728	-0.0268373	-0.017655		-0.088	-0.00706812		-0.0093991	-0.0280883	-0.0216543
-0.0878	0.00348528		0.00327027	0.00416081	0.0023426		-0.0878	0.00431489		0.00130594	0.00292505	0.00233065		-0.0878	-0.00792198		-0.0253515	-0.0268251	-0.0176463		-0.0878	-0.00706588		-0.00939825	-0.0280776	-0.0216582
-0.0876	0.00348732		0.00329266	0.00416999	0.00235137		-0.0876	0.00431714		0.00130715	0.00293632	0.00233178		-0.0876	-0.00791994		-0.0253291	-0.026816	-0.0176375		-0.0876	-0.00706363		-0.00939705	-0.0280664	-0.0216571
-0.0874	0.00348961		0.00331234	0.00418001	0.00236363		-0.0874	0.00432332		0.00130744	0.00294623	0.002334		-0.0874	-0.00791765		-0.0253094	-0.026806	-0.0176252		-0.0874	-0.00705745		-0.00939675	-0.0280564	-0.0216549
-0.0872	0.00349144		0.0033245	0.0041867	0.00237585		-0.0872	0.00432738		0.00130745	0.00295383	0.00233931		-0.0872	-0.00791582		-0.0252973	-0.0267993	-0.017613		-0.0872	-0.00705339		-0.00939674	-0.0280488	-0.0216496
-0.087	0.00349097		0.00333184	0.00419196	0.00239048		-0.087	0.00432987		0.00130882	0.0029585	0.00234344		-0.087	-0.00791629		-0.0252899	-0.026794	-0.0175984		-0.087	-0.0070509		-0.00939538	-0.0280442	-0.0216454
-0.0868	0.0034878		0.00333622	0.00419927	0.00240826		-0.0868	0.00433173		0.00130962	0.00296209	0.00234643		-0.0868	-0.00791947		-0.0252856	-0.0267867	-0.0175806		-0.0868	-0.00704904		-0.00939458	-0.0280406	-0.0216424
-0.0866	0.00348429		0.00334046	0.00420402	0.00242703		-0.0866	0.00433782		0.0013101	0.00296562	0.00234422		-0.0866	-0.00792298		-0.0252813	-0.0267819	-0.0175618		-0.0866	-0.00704295		-0.00939409	-0.028037	-0.0216446
-0.0864	0.00348292		0.00335194	0.00420875	0.00244112		-0.0864	0.0043419		0.00130933	0.00296755	0.00234034		-0.0864	-0.00792434		-0.0252698	-0.0267772	-0.0175477		-0.0864	-0.00703887		-0.00939487	-0.0280351	-0.0216485
-0.0862	0.0034822		0.00336528	0.00421281	0.00245358		-0.0862	0.00434822		0.00130994	0.00296859	0.00233357		-0.0862	-0.00792507		-0.0252565	-0.0267731	-0.0175353		-0.0862	-0.00703255		-0.00939425	-0.0280341	-0.0216553
-0.086	0.00348129		0.00337651	0.00422033	0.00246395		-0.086	0.00435364		0.00131262	0.00296995	0.00232755		-0.086	-0.00792597		-0.0252453	-0.0267656	-0.0175249		-0.086	-0.00702713		-0.00939158	-0.0280327	-0.0216613
-0.0858	0.00348082		0.0034069	0.00422904	0.00247606		-0.0858	0.00436159		0.00131269	0.00296929	0.00232124		-0.0858	-0.00792645		-0.0252149	-0.0267569	-0.0175128		-0.0858	-0.00701918		-0.0093915	-0.0280334	-0.0216676
-0.0856	0.00347612		0.00343704	0.0042377	0.00248816		-0.0856	0.00436888		0.00131209	0.00297479	0.00231945		-0.0856	-0.00793114		-0.0251847	-0.0267483	-0.0175007		-0.0856	-0.0070119		-0.00939211	-0.0280279	-0.0216694
-0.0854	0.00346983		0.00346153	0.00424855	0.00250146		-0.0854	0.0043772		0.00131212	0.00297455	0.00231516		-0.0854	-0.00793743		-0.0251602	-0.0267374	-0.0174874		-0.0854	-0.00700357		-0.00939208	-0.0280281	-0.0216737
-0.0852	0.00346409		0.00347967	0.00425598	0.00251509		-0.0852	0.00438482		0.0013117	0.0029737	0.00231051		-0.0852	-0.00794317		-0.0251421	-0.02673	-0.0174738		-0.0852	-0.00699595		-0.0093925	-0.028029	-0.0216784
-0.085	0.00345584		0.00348229	0.00427633	0.00252843		-0.085	0.00438937		0.00131187	0.00297453	0.00230738		-0.085	-0.00795143		-0.0251395	-0.0267096	-0.0174604		-0.085	-0.00699141		-0.00939232	-0.0280281	-0.0216815
-0.0848	0.00344818		0.00350342	0.00428923	0.00254334		-0.0848	0.00439502		0.00131103	0.00297323	0.00230889		-0.0848	-0.00795908		-0.0251184	-0.0266967	-0.0174455		-0.0848	-0.00698575		-0.00939317	-0.0280294	-0.02168
-0.0846	0.00344089		0.00353238	0.00429988	0.00255802		-0.0846	0.00440216		0.00131253	0.0029768	0.00231088		-0.0846	-0.00796637		-0.0250894	-0.0266861	-0.0174308		-0.0846	-0.00697861		-0.00939167	-0.0280259	-0.021678
-0.0844	0.00343472		0.00355521	0.00430565	0.00257366		-0.0844	0.00440645		0.00131224	0.00298211	0.00231157		-0.0844	-0.00797254		-0.0250666	-0.0266803	-0.0174152		-0.0844	-0.00697432		-0.00939196	-0.0280206	-0.0216773
-0.0842	0.00342849		0.00358296	0.00430978	0.00259192		-0.0842	0.00441146		0.00131191	0.00298838	0.00231262		-0.0842	-0.00797877		-0.0250388	-0.0266762	-0.0173969		-0.0842	-0.00696931		-0.00939229	-0.0280143	-0.0216762
-0.084	0.00341929		0.00360832	0.00432103	0.00261073		-0.084	0.00441334		0.00131155	0.00299391	0.00231449		-0.084	-0.00798797		-0.0250135	-0.0266649	-0.0173781		-0.084	-0.00696743		-0.00939264	-0.0280088	-0.0216744
-0.0838	0.00340977		0.00362601	0.00433597	0.00263172		-0.0838	0.00441568		0.00131081	0.00299475	0.00231812		-0.0838	-0.00799749		-0.0249958	-0.02665	-0.0173571		-0.0838	-0.00696509		-0.00939338	-0.0280079	-0.0216707
-0.0836	0.00340006		0.0036413	0.00434812	0.00265157		-0.0836	0.00441805		0.00131036	0.00299447	0.00232202		-0.0836	-0.0080072		-0.0249805	-0.0266378	-0.0173373		-0.0836	-0.00696272		-0.00939384	-0.0280082	-0.0216668
-0.0834	0.00339428		0.00365041	0.00435265	0.00267227		-0.0834	0.00442103		0.00130939	0.00299959	0.00232486		-0.0834	-0.00801298		-0.0249714	-0.0266333	-0.0173166		-0.0834	-0.00695974		-0.00939481	-0.0280031	-0.021664
-0.0832	0.00338887		0.00365655	0.00436212	0.00269583		-0.0832	0.00442243		0.00131102	0.00300626	0.00232644		-0.0832	-0.0080184		-0.0249652	-0.0266238	-0.017293		-0.0832	-0.00695834		-0.00939318	-0.0279964	-0.0216624
-0.083	0.00338458		0.00365926	0.00437186	0.00271727		-0.083	0.00442373		0.00131004	0.00301733	0.00232783		-0.083	-0.00802268		-0.0249625	-0.0266141	-0.0172716		-0.083	-0.00695704		-0.00939415	-0.0279853	-0.021661
-0.0828	0.00338296		0.00366263	0.00438027	0.00273938		-0.0828	0.00442229		0.00130823	0.00302672	0.00232654		-0.0828	-0.0080243		-0.0249592	-0.0266057	-0.0172495		-0.0828	-0.00695848		-0.00939597	-0.0279759	-0.0216623
-0.0826	0.00337853		0.00366774	0.00439073	0.00276276		-0.0826	0.00442161		0.00130695	0.00303309	0.00232481		-0.0826	-0.00802874		-0.024954	-0.0265952	-0.0172261		-0.0826	-0.00695916		-0.00939725	-0.0279696	-0.0216641
-0.0824	0.00337159		0.00367383	0.00440306	0.00278709		-0.0824	0.00442151		0.00130683	0.00303954	0.00232419		-0.0824	-0.00803567		-0.0249479	-0.0265829	-0.0172018		-0.0824	-0.00695926		-0.00939736	-0.0279631	-0.0216647
-0.0822	0.00336082		0.00367852	0.00441267	0.00281113		-0.0822	0.0044227		0.00130596	0.00304259	0.00232415		-0.0822	-0.00804644		-0.0249433	-0.0265733	-0.0171777		-0.0822	-0.00695807		-0.00939824	-0.0279601	-0.0216647
-0.082	0.00334884		0.00368651	0.0044188	0.00283479		-0.082	0.00442308		0.00130543	0.00304626	0.00232278		-0.082	-0.00805842		-0.0249353	-0.0265672	-0.0171541		-0.082	-0.00695769		-0.00939877	-0.0279564	-0.0216661
-0.0818	0.00333487		0.0037088	0.00442571	0.00286076		-0.0818	0.00442667		0.0013056	0.00304911	0.00232103		-0.0818	-0.00807239		-0.024913	-0.0265603	-0.0171281		-0.0818	-0.0069541		-0.0093986	-0.0279536	-0.0216678
-0.0816	0.00331972		0.00374041	0.00443206	0.00288327		-0.0816	0.0044321		0.00130413	0.00305082	0.00232095		-0.0816	-0.00808754		-0.0248814	-0.0265539	-0.0171056		-0.0816	-0.00694867		-0.00940007	-0.0279518	-0.0216679
-0.0814	0.00330368		0.00377398	0.00443761	0.00290707		-0.0814	0.00443863		0.00130464	0.00305303	0.00232069		-0.0814	-0.00810358		-0.0248478	-0.0265484	-0.0170818		-0.0814	-0.00694215		-0.00939956	-0.0279496	-0.0216682
-0.0812	0.00328713		0.0038048	0.00444374	0.00293059		-0.0812	0.00444556		0.00130508	0.00305374	0.00232145		-0.0812	-0.00812014		-0.024817	-0.0265422	-0.0170583		-0.0812	-0.00693521		-0.00939912	-0.0279489	-0.0216674
-0.081	0.00327111		0.00382837	0.00445412	0.00295336		-0.081	0.00445268		0.00130544	0.00305617	0.00231968		-0.081	-0.00813615		-0.0247934	-0.0265318	-0.0170355		-0.081	-0.00692809		-0.00939876	-0.0279465	-0.0216692
-0.0808	0.00325552		0.0038424	0.00446704	0.00297771		-0.0808	0.00445808		0.00130584	0.0030593	0.00231986		-0.0808	-0.00815175		-0.0247794	-0.0265189	-0.0170112		-0.0808	-0.00692269		-0.00939835	-0.0279434	-0.021669
-0.0806	0.00323717		0.00384561	0.00447767	0.00299751		-0.0806	0.00446226		0.00130745	0.0030647	0.00231884		-0.0806	-0.0081701		-0.0247762	-0.0265083	-0.0169913		-0.0806	-0.00691851		-0.00939674	-0.027938	-0.02167
-0.0804	0.00321837		0.00384995	0.0044888	0.0030164		-0.0804	0.00446393		0.0013085	0.00306815	0.00232095		-0.0804	-0.0081889		-0.0247718	-0.0264972	-0.0169725		-0.0804	-0.00691684		-0.0093957	-0.0279345	-0.0216679
-0.0802	0.00320065		0.00386125	0.00449845	0.00303384		-0.0802	0.0044628		0.00130946	0.00308993	0.00232139		-0.0802	-0.00820662		-0.0247605	-0.0264875	-0.016955		-0.0802	-0.00691797		-0.00939474	-0.0279127	-0.0216675
-0.08	0.00318792		0.00387406	0.00450914	0.00305045		-0.08	0.00446222		0.00131017	0.00310235	0.0023232		-0.08	-0.00821934		-0.0247477	-0.0264768	-0.0169384		-0.08	-0.00691856		-0.00939403	-0.0279003	-0.0216657
-0.0798	0.00317807		0.00388751	0.00451568	0.00306568		-0.0798	0.00446044		0.00131217	0.00311464	0.00232655		-0.0798	-0.00822919		-0.0247343	-0.0264703	-0.0169232		-0.0798	-0.00692033		-0.00939203	-0.027888	-0.0216623
-0.0796	0.00317183		0.00389098	0.00452173	0.003082		-0.0796	0.00445978		0.00131478	0.00311826	0.00232551		-0.0796	-0.00823543		-0.0247308	-0.0264642	-0.0169069		-0.0796	-0.00692099		-0.00938942	-0.0278844	-0.0216634
-0.0794	0.00317007		0.00389335	0.00452877	0.00309838		-0.0794	0.00445874		0.00131691	0.00312528	0.00232663		-0.0794	-0.00823719		-0.0247284	-0.0264572	-0.0168905		-0.0794	-0.00692203		-0.00938729	-0.0278774	-0.0216622
-0.0792	0.00316788		0.00389658	0.00453571	0.00311624		-0.0792	0.00445935		0.00131899	0.00313234	0.0023276		-0.0792	-0.00823938		-0.0247252	-0.0264503	-0.0168726		-0.0792	-0.00692142		-0.0093852	-0.0278703	-0.0216613
-0.079	0.00316372		0.00390089	0.00454762	0.00313494		-0.079	0.00445957		0.00131908	0.0031386	0.00233009		-0.079	-0.00824355		-0.0247209	-0.0264383	-0.0168539		-0.079	-0.00692121		-0.00938512	-0.0278641	-0.0216588
-0.0788	0.00315943		0.00390606	0.0045622	0.00315433		-0.0788	0.00446471		0.00132116	0.00314821	0.00233441		-0.0788	-0.00824783		-0.0247157	-0.0264238	-0.0168345		-0.0788	-0.00691606		-0.00938304	-0.0278545	-0.0216545
-0.0786	0.00315422		0.00391264	0.0045797	0.0031725		-0.0786	0.0044718		0.0013224	0.003158	0.00233678		-0.0786	-0.00825304		-0.0247091	-0.0264063	-0.0168164		-0.0786	-0.00690897		-0.0093818	-0.0278447	-0.0216521
-0.0784	0.00314878		0.00391808	0.00459412	0.00318998		-0.0784	0.00447721		0.00132414	0.00317023	0.00234272		-0.0784	-0.00825848		-0.0247037	-0.0263918	-0.0167989		-0.0784	-0.00690356		-0.00938005	-0.0278324	-0.0216461
-0.0782	0.00314051		0.00392144	0.00460745	0.00320762		-0.0782	0.00448768		0.00132624	0.00318125	0.00234621		-0.0782	-0.00826676		-0.0247003	-0.0263785	-0.0167812		-0.0782	-0.0068931		-0.00937796	-0.0278214	-0.0216427
-0.078	0.00313199		0.00392484	0.00461904	0.00322288		-0.078	0.00450234		0.0013273	0.00319159	0.00235214		-0.078	-0.00827527		-0.0246969	-0.0263669	-0.016766		-0.078	-0.00687843		-0.0093769	-0.0278111	-0.0216367
-0.0778	0.00312154		0.00392714	0.00462903	0.00323903		-0.0778	0.00452142		0.00132784	0.00320043	0.00235711		-0.0778	-0.00828573		-0.0246946	-0.0263569	-0.0167498		-0.0778	-0.00685935		-0.00937636	-0.0278022	-0.0216318
-0.0776	0.00310884		0.00392993	0.00464404	0.00325469		-0.0776	0.00454458		0.00132846	0.00321108	0.00236343		-0.0776	-0.00829843		-0.0246918	-0.0263419	-0.0167342		-0.0776	-0.00683619		-0.00937573	-0.0277916	-0.0216254
-0.0774	0.00309582		0.00393133	0.00465753	0.00327093		-0.0774	0.00456497		0.00132897	0.00322071	0.00237304		-0.0774	-0.00831144		-0.0246905	-0.0263284	-0.0167179		-0.0774	-0.0068158		-0.00937523	-0.027782	-0.0216158
-0.0772	0.00308259		0.00393225	0.0046748	0.00328903		-0.0772	0.00458105		0.00133067	0.00323176	0.00238196		-0.0772	-0.00832467		-0.0246895	-0.0263112	-0.0166998		-0.0772	-0.00679972		-0.00937353	-0.0277709	-0.0216069
-0.077	0.0030679		0.0039342	0.00469224	0.00330631		-0.077	0.00459515		0.00133063	0.00324193	0.00239158		-0.077	-0.00833936		-0.0246876	-0.0262937	-0.0166825		-0.077	-0.00678562		-0.00937357	-0.0277607	-0.0215973
-0.0768	0.00305423		0.00393682	0.00470998	0.00332056		-0.0768	0.0046133		0.00133201	0.00325152	0.0024013		-0.0768	-0.00835303		-0.024685	-0.026276	-0.0166683		-0.0768	-0.00676747		-0.00937218	-0.0277511	-0.0215876
-0.0766	0.00304217		0.00393802	0.00472519	0.00333747		-0.0766	0.00463483		0.00133346	0.00326145	0.00241251		-0.0766	-0.0083651		-0.0246838	-0.0262608	-0.0166514		-0.0766	-0.00674594		-0.00937074	-0.0277412	-0.0215764
-0.0764	0.00302677		0.0039397	0.00473753	0.00335356		-0.0764	0.00465489		0.00133294	0.00327001	0.00242373		-0.0764	-0.0083805		-0.0246821	-0.0262484	-0.0166353		-0.0764	-0.00672588		-0.00937126	-0.0277327	-0.0215651
-0.0762	0.00301326		0.00394195	0.00475075	0.00336827		-0.0762	0.00467127		0.00133277	0.00327793	0.00242951		-0.0762	-0.008394		-0.0246798	-0.0262352	-0.0166206		-0.0762	-0.0067095		-0.00937143	-0.0277247	-0.0215594
-0.076	0.00299985		0.00394241	0.00476148	0.00338087		-0.076	0.00468102		0.00133447	0.00328585	0.00243933		-0.076	-0.00840741		-0.0246794	-0.0262245	-0.016608		-0.076	-0.00669975		-0.00936973	-0.0277168	-0.0215495
-0.0758	0.00298843		0.00394669	0.00477667	0.00339371		-0.0758	0.00468508		0.00133751	0.00329327	0.00244998		-0.0758	-0.00841883		-0.0246751	-0.0262093	-0.0165951		-0.0758	-0.00669569		-0.00936668	-0.0277094	-0.0215389
-0.0756	0.00297857		0.00394872	0.00479604	0.00340938		-0.0756	0.00469489		0.00133871	0.00330205	0.00246089		-0.0756	-0.00842869		-0.0246731	-0.0261899	-0.0165795		-0.0756	-0.00668588		-0.00936548	-0.0277006	-0.021528
-0.0754	0.00297125		0.00395113	0.00481	0.00342522		-0.0754	0.00470417		0.00134273	0.00331132	0.00247469		-0.0754	-0.00843601		-0.0246706	-0.026176	-0.0165636		-0.0754	-0.0066766		-0.00936147	-0.0276913	-0.0215142
-0.0752	0.00296313		0.00395269	0.00482893	0.00344387		-0.0752	0.00471368		0.0013469	0.00331949	0.0024885		-0.0752	-0.00844413		-0.0246691	-0.026157	-0.016545		-0.0752	-0.0066671		-0.0093573	-0.0276832	-0.0215004
-0.075	0.00295591		0.00395259	0.00484218	0.00346215		-0.075	0.00471431		0.00134826	0.00332897	0.00250363		-0.075	-0.00845135		-0.0246692	-0.0261438	-0.0165267		-0.075	-0.00666646		-0.00935593	-0.0276737	-0.0214852
-0.0748	0.00294999		0.00395431	0.00485693	0.00348075		-0.0748	0.00472261		0.00135091	0.00333791	0.00252097		-0.0748	-0.00845728		-0.0246675	-0.026129	-0.0165081		-0.0748	-0.00665816		-0.00935329	-0.0276648	-0.0214679
-0.0746	0.00294355		0.00395615	0.00487195	0.00350163		-0.0746	0.00473547		0.00134987	0.00334747	0.00253481		-0.0746	-0.00846372		-0.0246656	-0.026114	-0.0164872		-0.0746	-0.0066453		-0.00935433	-0.0276552	-0.0214541
-0.0744	0.00293637		0.00395739	0.00490025	0.00352239		-0.0744	0.00474155		0.00135167	0.00335612	0.00255228		-0.0744	-0.00847089		-0.0246644	-0.0260857	-0.0164665		-0.0744	-0.00663923		-0.00935253	-0.0276465	-0.0214366
-0.0742	0.00293054		0.0039593	0.0049245	0.00353988		-0.0742	0.0047429		0.00135275	0.00336512	0.00257318		-0.0742	-0.00847672		-0.0246625	-0.0260615	-0.016449		-0.0742	-0.00663787		-0.00935145	-0.0276375	-0.0214157
-0.074	0.00292507		0.00396005	0.00494581	0.0035519		-0.074	0.00474993		0.00135292	0.00337372	0.00259929		-0.074	-0.00848219		-0.0246617	-0.0260402	-0.016437		-0.074	-0.00663084		-0.00935128	-0.0276289	-0.0213896
-0.0738	0.00292179		0.00396078	0.00496652	0.0035645		-0.0738	0.00476439		0.00135522	0.00338198	0.00263057		-0.0738	-0.00848548		-0.024661	-0.0260194	-0.0164244		-0.0738	-0.00661638		-0.00934898	-0.0276207	-0.0213583
-0.0736	0.00291705		0.00396237	0.00499232	0.00357335		-0.0736	0.00478557		0.00135544	0.00339365	0.00265976		-0.0736	-0.00849022		-0.0246594	-0.0259936	-0.0164155		-0.0736	-0.0065952		-0.00934876	-0.027609	-0.0213291
-0.0734	0.00291093		0.00396403	0.005017	0.00358112		-0.0734	0.00481332		0.00135583	0.0034059	0.00268476		-0.0734	-0.00849633		-0.0246578	-0.025969	-0.0164077		-0.0734	-0.00656745		-0.00934837	-0.0275968	-0.0213041
-0.0732	0.00290488		0.00396558	0.00504187	0.00359148		-0.0732	0.00484614		0.00135648	0.00341493	0.00269846		-0.0732	-0.00850238		-0.0246562	-0.0259441	-0.0163974		-0.0732	-0.00653463		-0.00934772	-0.0275877	-0.0212904
-0.073	0.00289891		0.00396669	0.00506365	0.00360111		-0.073	0.00487808		0.00135715	0.00342511	0.00271998		-0.073	-0.00850836		-0.0246551	-0.0259223	-0.0163878		-0.073	-0.00650269		-0.00934705	-0.0275776	-0.0212689
-0.0728	0.00289274		0.00396514	0.00507961	0.00361378		-0.0728	0.00491034		0.00136007	0.00343348	0.00274422		-0.0728	-0.00851452		-0.0246566	-0.0259063	-0.0163751		-0.0728	-0.00647043		-0.00934412	-0.0275692	-0.0212446
-0.0726	0.00289015		0.00396708	0.00510225	0.00362593		-0.0726	0.0049269		0.00136301	0.00344105	0.00277284		-0.0726	-0.00851711		-0.0246547	-0.0258837	-0.0163629		-0.0726	-0.00645387		-0.00934118	-0.0275616	-0.021216
-0.0724	0.00288394		0.0039678	0.00512615	0.00363823		-0.0724	0.00495531		0.00136619	0.00345507	0.00280252		-0.0724	-0.00852332		-0.024654	-0.0258598	-0.0163506		-0.0724	-0.00642547		-0.009338	-0.0275476	-0.0211863
-0.0722	0.00287813		0.00397077	0.00514852	0.00365201		-0.0722	0.00498209		0.00137135	0.00346745	0.00283117		-0.0722	-0.00852913		-0.024651	-0.0258374	-0.0163368		-0.0722	-0.00639869		-0.00933285	-0.0275352	-0.0211577
-0.072	0.00287054		0.00397544	0.00516812	0.00366436		-0.072	0.00501009		0.00137506	0.00348323	0.00286194		-0.072	-0.00853672		-0.0246463	-0.0258178	-0.0163245		-0.072	-0.00637068		-0.00932914	-0.0275194	-0.0211269
-0.0718	0.00286382		0.00398525	0.00518569	0.00367826		-0.0718	0.0050334		0.00138132	0.00349982	0.00288821		-0.0718	-0.00854344		-0.0246365	-0.0258003	-0.0163106		-0.0718	-0.00634737		-0.00932288	-0.0275028	-0.0211007
-0.0716	0.00285779		0.00399927	0.00520091	0.00369206		-0.0716	0.00504775		0.00138617	0.00351834	0.00290804		-0.0716	-0.00854947		-0.0246225	-0.025785	-0.0162968		-0.0716	-0.00633303		-0.00931802	-0.0274843	-0.0210808
-0.0714	0.00285186		0.00400566	0.00521812	0.00370643		-0.0714	0.00505316		0.00139369	0.00352991	0.00292119		-0.0714	-0.0085554		-0.0246161	-0.0257678	-0.0162824		-0.0714	-0.00632761		-0.0093105	-0.0274728	-0.0210677
-0.0712	0.00284648		0.00400648	0.00524777	0.00372316		-0.0712	0.00505631		0.00139766	0.003541	0.00293653		-0.0712	-0.00856079		-0.0246153	-0.0257382	-0.0162657		-0.0712	-0.00632446		-0.00930654	-0.0274617	-0.0210523
-0.071	0.00284322		0.00401493	0.00529542	0.00373823		-0.071	0.00506312		0.00140426	0.00355068	0.00295648		-0.071	-0.00856404		-0.0246069	-0.0256905	-0.0162506		-0.071	-0.00631766		-0.00929993	-0.027452	-0.0210324
-0.0708	0.00283898		0.00402593	0.00533733	0.00375059		-0.0708	0.00507273		0.00141155	0.00356528	0.00297462		-0.0708	-0.00856828		-0.0245958	-0.0256486	-0.0162383		-0.0708	-0.00630804		-0.00929265	-0.0274374	-0.0210142
-0.0706	0.00283709		0.00403939	0.00538617	0.00376261		-0.0706	0.00508312		0.00142066	0.00358121	0.00299334		-0.0706	-0.00857017		-0.0245824	-0.0255998	-0.0162262		-0.0706	-0.00629765		-0.00928354	-0.0274215	-0.0209955
-0.0704	0.00283356		0.0040565	0.00543743	0.00377388		-0.0704	0.00509494		0.00142654	0.0035945	0.00301236		-0.0704	-0.0085737		-0.0245653	-0.0255485	-0.016215		-0.0704	-0.00628583		-0.00927766	-0.0274082	-0.0209765
-0.0702	0.00283088		0.00407504	0.00547665	0.0037851		-0.0702	0.00510622		0.00143007	0.00361209	0.00302257		-0.0702	-0.00857638		-0.0245467	-0.0255093	-0.0162038		-0.0702	-0.00627455		-0.00927413	-0.0273906	-0.0209663
-0.07	0.00282935		0.00409471	0.00550024	0.00379619		-0.07	0.0051201		0.0014343	0.00362673	0.00303999		-0.07	-0.00857792		-0.0245271	-0.0254857	-0.0161927		-0.07	-0.00626067		-0.0092699	-0.0273759	-0.0209489
-0.0698	0.00282776		0.00410767	0.00555528	0.00380785		-0.0698	0.00513242		0.00143678	0.00363579	0.0030586		-0.0698	-0.0085795		-0.0245141	-0.0254307	-0.016181		-0.0698	-0.00624835		-0.00926742	-0.0273669	-0.0209303
-0.0696	0.00282643		0.00411641	0.00561844	0.00381776		-0.0696	0.0051442		0.00143538	0.00365412	0.00307706		-0.0696	-0.00858083		-0.0245054	-0.0253675	-0.0161711		-0.0696	-0.00623658		-0.00926882	-0.0273485	-0.0209118
-0.0694	0.00282428		0.00412457	0.0056716	0.00382896		-0.0694	0.00515124		0.00143643	0.00367725	0.00309375		-0.0694	-0.00858299		-0.0244972	-0.0253144	-0.0161599		-0.0694	-0.00622953		-0.00926777	-0.0273254	-0.0208951
-0.0692	0.00282251		0.0041413	0.00572507	0.00384067		-0.0692	0.00515899		0.001439	0.00371485	0.00310972		-0.0692	-0.00858475		-0.0244805	-0.0252609	-0.0161482		-0.0692	-0.00622178		-0.0092652	-0.0272878	-0.0208791
-0.069	0.00281933		0.00416027	0.00577677	0.00385164		-0.069	0.00516919		0.00144351	0.00375547	0.00312433		-0.069	-0.00858793		-0.0244615	-0.0252092	-0.0161372		-0.069	-0.00621158		-0.00926069	-0.0272472	-0.0208645
-0.0688	0.00281583		0.00417893	0.00580724	0.00386218		-0.0688	0.00518396		0.00144758	0.00379666	0.00313483		-0.0688	-0.00859143		-0.0244429	-0.0251787	-0.0161267		-0.0688	-0.00619682		-0.00925661	-0.027206	-0.020854
-0.0686	0.00281255		0.00419011	0.00582255	0.00387254		-0.0686	0.00520071		0.00145183	0.00382798	0.00314289		-0.0686	-0.00859471		-0.0244317	-0.0251634	-0.0161163		-0.0686	-0.00618006		-0.00925237	-0.0271747	-0.020846
-0.0684	0.00280449		0.00419539	0.005844	0.00388317		-0.0684	0.00521517		0.00145756	0.00385099	0.00315086		-0.0684	-0.00860278		-0.0244264	-0.025142	-0.0161057		-0.0684	-0.0061656		-0.00924664	-0.0271517	-0.020838
-0.0682	0.00279476		0.0042073	0.00586947	0.00389559		-0.0682	0.00522761		0.00146326	0.00386029	0.00315607		-0.0682	-0.0086125		-0.0244145	-0.0251165	-0.0160933		-0.0682	-0.00615317		-0.00924094	-0.0271424	-0.0208328
-0.068	0.00278447		0.00422258	0.00589282	0.00390654		-0.068	0.00523586		0.00146932	0.00387339	0.00316379		-0.068	-0.00862279		-0.0243992	-0.0250931	-0.0160823		-0.068	-0.00614491		-0.00923488	-0.0271293	-0.0208251
-0.0678	0.00277492		0.00423495	0.0059168	0.00391721		-0.0678	0.0052456		0.00147348	0.00388458	0.00317018		-0.0678	-0.00863234		-0.0243868	-0.0250692	-0.0160716		-0.0678	-0.00613517		-0.00923072	-0.0271181	-0.0208187
-0.0676	0.00276483		0.00425044	0.00594012	0.00392666		-0.0676	0.00525447		0.00147745	0.00389703	0.00317545		-0.0676	-0.00864243		-0.0243713	-0.0250458	-0.0160622		-0.0676	-0.0061263		-0.00922674	-0.0271056	-0.0208134
-0.0674	0.00275516		0.004272	0.0059624	0.00393842		-0.0674	0.00526549		0.0014802	0.00391786	0.00318064		-0.0674	-0.0086521		-0.0243498	-0.0250236	-0.0160504		-0.0674	-0.00611528		-0.00922399	-0.0270848	-0.0208082
-0.0672	0.00274109		0.00429755	0.00598286	0.00394926		-0.0672	0.00527409		0.00148346	0.00395609	0.00318578		-0.0672	-0.00866617		-0.0243242	-0.0250031	-0.0160396		-0.0672	-0.00610668		-0.00922074	-0.0270466	-0.0208031
-0.067	0.00272952		0.00432419	0.00600322	0.00395998		-0.067	0.00528067		0.00148592	0.00397182	0.00319202		-0.067	-0.00867774		-0.0242976	-0.0249827	-0.0160289		-0.067	-0.0061001		-0.00921828	-0.0270308	-0.0207968
-0.0668	0.00271652		0.00434052	0.00602508	0.00397026		-0.0668	0.00528722		0.00148754	0.00401057	0.00319752		-0.0668	-0.00869074		-0.0242813	-0.0249609	-0.0160186		-0.0668	-0.00609355		-0.00921666	-0.0269921	-0.0207913
-0.0666	0.00270772		0.00434672	0.00604565	0.00398134		-0.0666	0.00529449		0.00148986	0.00404324	0.00320254		-0.0666	-0.00869955		-0.0242751	-0.0249403	-0.0160075		-0.0666	-0.00608628		-0.00921434	-0.0269594	-0.0207863
-0.0664	0.0027023		0.00435761	0.00607509	0.00399348		-0.0664	0.00530102		0.00148963	0.00405741	0.00320762		-0.0664	-0.00870496		-0.0242642	-0.0249109	-0.0159954		-0.0664	-0.00607975		-0.00921457	-0.0269453	-0.0207812
-0.0662	0.00269849		0.00437023	0.00610639	0.00400416		-0.0662	0.00530654		0.00149169	0.00407221	0.00321555		-0.0662	-0.00870878		-0.0242516	-0.0248796	-0.0159847		-0.0662	-0.00607423		-0.00921251	-0.0269305	-0.0207733
-0.066	0.00269519		0.00438643	0.00615644	0.00401816		-0.066	0.00530871		0.00149207	0.00409965	0.00322363		-0.066	-0.00871207		-0.0242353	-0.0248295	-0.0159707		-0.066	-0.00607207		-0.00921213	-0.026903	-0.0207652
-0.0658	0.00269128		0.00440558	0.00620581	0.00403294		-0.0658	0.00531146		0.00149277	0.00413507	0.00323143		-0.0658	-0.00871598		-0.0242162	-0.0247802	-0.0159559		-0.0658	-0.00606931		-0.00921143	-0.0268676	-0.0207574
-0.0656	0.00268509		0.0044254	0.00625529	0.00404985		-0.0656	0.00531178		0.00149352	0.00418877	0.00324122		-0.0656	-0.00872217		-0.0241964	-0.0247307	-0.015939		-0.0656	-0.00606899		-0.00921067	-0.0268139	-0.0207476
-0.0654	0.00267846		0.00444453	0.0063014	0.00406666		-0.0654	0.00531176		0.00149528	0.00424963	0.00325005		-0.0654	-0.0087288		-0.0241772	-0.0246846	-0.0159222		-0.0654	-0.00606901		-0.00920892	-0.026753	-0.0207388
-0.0652	0.00267021		0.0044645	0.00633357	0.00408245		-0.0652	0.00531436		0.00149587	0.00428877	0.00325562		-0.0652	-0.00873705		-0.0241573	-0.0246524	-0.0159064		-0.0652	-0.00606641		-0.00920833	-0.0267139	-0.0207332
-0.065	0.00266311		0.00448629	0.00637082	0.00410016		-0.065	0.00531885		0.00149712	0.00433166	0.00326243		-0.065	-0.00874415		-0.0241355	-0.0246151	-0.0158887		-0.065	-0.00606192		-0.00920708	-0.026671	-0.0207264
-0.0648	0.00265339		0.00450464	0.00640639	0.00412087		-0.0648	0.00532334		0.00149837	0.00438788	0.00327044		-0.0648	-0.00875387		-0.0241171	-0.0245796	-0.015868		-0.0648	-0.00605743		-0.00920583	-0.0266148	-0.0207184
-0.0646	0.00264455		0.00451749	0.00643135	0.00414267		-0.0646	0.00532517		0.00149792	0.00443805	0.00327906		-0.0646	-0.00876271		-0.0241043	-0.0245546	-0.0158462		-0.0646	-0.0060556		-0.00920628	-0.0265646	-0.0207098
-0.0644	0.00263643		0.00455279	0.00646843	0.00416353		-0.0644	0.00532912		0.00149855	0.00449432	0.00328934		-0.0644	-0.00877083		-0.024069	-0.0245175	-0.0158253		-0.0644	-0.00605165		-0.00920565	-0.0265083	-0.0206995
-0.0642	0.00262736		0.0046222	0.00651711	0.00418457		-0.0642	0.00533369		0.00149969	0.00456485	0.00330088		-0.0642	-0.00877991		-0.0239996	-0.0244689	-0.0158043		-0.0642	-0.00604708		-0.00920451	-0.0264378	-0.020688
-0.064	0.00261848		0.00470117	0.00657078	0.0042057		-0.064	0.00533999		0.00150178	0.00461855	0.00331308		-0.064	-0.00878878		-0.0239206	-0.0244152	-0.0157832		-0.064	-0.00604078		-0.00920242	-0.0263841	-0.0206758
-0.0638	0.00261061		0.00476695	0.00663713	0.00422986		-0.0638	0.00534264		0.00150398	0.00466467	0.00332664		-0.0638	-0.00879665		-0.0238548	-0.0243488	-0.015759		-0.0638	-0.00603813		-0.00920022	-0.026338	-0.0206622
-0.0636	0.00260411		0.00479876	0.00668122	0.00425308		-0.0636	0.00534333		0.00150615	0.00470401	0.00334323		-0.0636	-0.00880315		-0.023823	-0.0243047	-0.0157358		-0.0636	-0.00603745		-0.00919804	-0.0262987	-0.0206456
-0.0634	0.00259645		0.00481669	0.00671799	0.00427716		-0.0634	0.00534511		0.00150731	0.00474599	0.00336337		-0.0634	-0.00881081		-0.0238051	-0.024268	-0.0157117		-0.0634	-0.00603566		-0.00919689	-0.0262567	-0.0206255
-0.0632	0.00259195		0.00485961	0.00676418	0.00429791		-0.0632	0.00534937		0.00150902	0.00479495	0.00338572		-0.0632	-0.00881532		-0.0237622	-0.0242218	-0.0156909		-0.0632	-0.0060314		-0.00919518	-0.0262077	-0.0206031
-0.063	0.00258563		0.00491521	0.0068286	0.00432231		-0.063	0.00535647		0.00151211	0.00484118	0.0034113		-0.063	-0.00882163		-0.0237066	-0.0241574	-0.0156666		-0.063	-0.0060243		-0.00919209	-0.0261615	-0.0205776
-0.0628	0.00257991		0.00497641	0.00689006	0.00434443		-0.0628	0.00536283		0.00151435	0.00487126	0.0034356		-0.0628	-0.00882735		-0.0236454	-0.0240959	-0.0156444		-0.0628	-0.00601794		-0.00918985	-0.0261314	-0.0205533
-0.0626	0.00257618		0.00503684	0.00693176	0.00436769		-0.0626	0.00537217		0.00151522	0.00489969	0.00345786		-0.0626	-0.00883109		-0.0235849	-0.0240542	-0.0156212		-0.0626	-0.0060086		-0.00918898	-0.026103	-0.020531
-0.0624	0.00257221		0.00508735	0.00698423	0.00438899		-0.0624	0.00538		0.00151923	0.00493291	0.00347572		-0.0624	-0.00883505		-0.0235344	-0.0240017	-0.0155999		-0.0624	-0.00600077		-0.00918496	-0.0260698	-0.0205131
-0.0622	0.00257019		0.00512439	0.00705368	0.00441157		-0.0622	0.00538921		0.0015225	0.00496268	0.00349287		-0.0622	-0.00883707		-0.0234974	-0.0239323	-0.0155773		-0.0622	-0.00599156		-0.0091817	-0.02604	-0.020496
-0.062	0.0025686		0.00514145	0.00712329	0.00443096		-0.062	0.00539783		0.00152776	0.004994	0.00350217		-0.062	-0.00883866		-0.0234803	-0.0238627	-0.0155579		-0.062	-0.00598294		-0.00917643	-0.0260087	-0.0204867
-0.0618	0.00256727		0.00515144	0.00719798	0.00445216		-0.0618	0.00540828		0.00153191	0.00502221	0.00350954		-0.0618	-0.00883999		-0.0234703	-0.023788	-0.0155367		-0.0618	-0.00597249		-0.00917229	-0.0259805	-0.0204793
-0.0616	0.00256541		0.00516394	0.00725492	0.00447086		-0.0616	0.00541925		0.00153658	0.00505154	0.00351595		-0.0616	-0.00884185		-0.0234578	-0.023731	-0.015518		-0.0616	-0.00596152		-0.00916761	-0.0259511	-0.0204729
-0.0614	0.00256373		0.00518791	0.00730231	0.00449291		-0.0614	0.00542811		0.00154246	0.0050798	0.00352241		-0.0614	-0.00884353		-0.0234339	-0.0236837	-0.0154959		-0.0614	-0.00595266		-0.00916174	-0.0259229	-0.0204665
-0.0612	0.00256061		0.00522725	0.00733982	0.00451164		-0.0612	0.00543404		0.00154677	0.00510853	0.00353661		-0.0612	-0.00884665		-0.0233945	-0.0236461	-0.0154772		-0.0612	-0.00594673		-0.00915743	-0.0258941	-0.0204523
-0.061	0.0025579		0.00527289	0.0073708	0.00453159		-0.061	0.00543708		0.00155375	0.00513672	0.00355666		-0.061	-0.00884936		-0.0233489	-0.0236152	-0.0154573		-0.061	-0.00594369		-0.00915045	-0.0258659	-0.0204322
-0.0608	0.00255561		0.00531063	0.00739616	0.00455012		-0.0608	0.0054435		0.00155935	0.00516814	0.00357943		-0.0608	-0.00885165		-0.0233112	-0.0235898	-0.0154387		-0.0608	-0.00593727		-0.00914485	-0.0258345	-0.0204094
-0.0606	0.00255378		0.00536145	0.00741954	0.00456705		-0.0606	0.00545491		0.00156458	0.00519794	0.00360358		-0.0606	-0.00885348		-0.0232603	-0.0235664	-0.0154218		-0.0606	-0.00592586		-0.00913961	-0.0258047	-0.0203853
-0.0604	0.0025537		0.0054274	0.00744962	0.00458517		-0.0604	0.00547185		0.00156961	0.00522769	0.00362688		-0.0604	-0.00885356		-0.0231944	-0.0235363	-0.0154037		-0.0604	-0.00590892		-0.00913459	-0.025775	-0.020362
-0.0602	0.00255313		0.00548859	0.00747377	0.00460391		-0.0602	0.00548598		0.00157351	0.00526271	0.00364968		-0.0602	-0.00885413		-0.0231332	-0.0235122	-0.0153849		-0.0602	-0.00589479		-0.00913069	-0.02574	-0.0203392
-0.06	0.00255347		0.00553743	0.00749878	0.00462359		-0.06	0.00550125		0.00157778	0.00530108	0.0036727		-0.06	-0.0088538		-0.0230843	-0.0234872	-0.0153653		-0.06	-0.00587952		-0.00912642	-0.0257016	-0.0203162
-0.0598	0.00255501		0.00557725	0.00753891	0.00464193		-0.0598	0.00550726		0.00158058	0.00534373	0.00369893		-0.0598	-0.00885225		-0.0230445	-0.023447	-0.0153469		-0.0598	-0.00587351		-0.00912361	-0.0256589	-0.0202899
-0.0596	0.0025574		0.00561127	0.00758402	0.00465901		-0.0596	0.00553032		0.00158402	0.00538777	0.00372305		-0.0596	-0.00884987		-0.0230105	-0.0234019	-0.0153298		-0.0596	-0.00585045		-0.00912018	-0.0256149	-0.0202658
-0.0594	0.00255806		0.00567284	0.0076239	0.00467736		-0.0594	0.0055663		0.00158553	0.00542612	0.00374446		-0.0594	-0.0088492		-0.0229489	-0.0233621	-0.0153115		-0.0594	-0.00581447		-0.00911866	-0.0255765	-0.0202444
-0.0592	0.00255918		0.00574344	0.0076613	0.00469138		-0.0592	0.00560715		0.00158759	0.00546235	0.00376929		-0.0592	-0.00884808		-0.0228783	-0.0233247	-0.0152975		-0.0592	-0.00577362		-0.00911661	-0.0255403	-0.0202196
-0.059	0.00255984		0.00581765	0.00771805	0.0047049		-0.059	0.0056477		0.00158967	0.00549998	0.00379506		-0.059	-0.00884742		-0.0228041	-0.0232679	-0.015284		-0.059	-0.00573307		-0.00911453	-0.0255027	-0.0201938
-0.0588	0.00256069		0.00589153	0.007782	0.00471977		-0.0588	0.00567194		0.00159226	0.00556163	0.00382471		-0.0588	-0.00884657		-0.0227302	-0.023204	-0.0152691		-0.0588	-0.00570883		-0.00911193	-0.025441	-0.0201642
-0.0586	0.00256345		0.0059579	0.00784768	0.00473425		-0.0586	0.00568378		0.00159611	0.00564612	0.00385219		-0.0586	-0.00884382		-0.0226639	-0.0231383	-0.0152546		-0.0586	-0.005697		-0.00910808	-0.0253565	-0.0201367
-0.0584	0.00256545		0.00603549	0.00791082	0.0047478		-0.0584	0.00568406		0.00159859	0.00570331	0.00387578		-0.0584	-0.00884182		-0.0225863	-0.0230751	-0.0152411		-0.0584	-0.00569671		-0.00910561	-0.0252994	-0.0201131
-0.0582	0.00256767		0.0061121	0.00797615	0.00475882		-0.0582	0.00569935		0.0016004	0.00575838	0.00390218		-0.0582	-0.00883959		-0.0225097	-0.0230098	-0.01523		-0.0582	-0.00568142		-0.0091038	-0.0252443	-0.0200867
-0.058	0.00256838		0.00618481	0.0080322	0.00477282		-0.058	0.00571549		0.00160217	0.00583961	0.00392419		-0.058	-0.00883888		-0.022437	-0.0229538	-0.015216		-0.058	-0.00566528		-0.00910203	-0.0251631	-0.0200647
-0.0578	0.00257137		0.00628393	0.00807677	0.00478669		-0.0578	0.00573079		0.00160417	0.00591549	0.0039495		-0.0578	-0.00883589		-0.0223379	-0.0229092	-0.0152022		-0.0578	-0.00564998		-0.00910002	-0.0250872	-0.0200394
-0.0576	0.00257082		0.00637859	0.00811754	0.00479798		-0.0576	0.0057455		0.00160584	0.00598362	0.00397519		-0.0576	-0.00883644		-0.0222432	-0.0228684	-0.0151909		-0.0576	-0.00563527		-0.00909836	-0.025019	-0.0200137
-0.0574	0.00257271		0.00645474	0.0081581	0.00480702		-0.0574	0.0057686		0.00160941	0.00601637	0.00400203		-0.0574	-0.00883455		-0.022167	-0.0228279	-0.0151818		-0.0574	-0.00561217		-0.00909479	-0.0249863	-0.0199868
-0.0572	0.00257225		0.00650149	0.00819633	0.00481613		-0.0572	0.00579905		0.00161359	0.00604611	0.00402984		-0.0572	-0.00883501		-0.0221203	-0.0227896	-0.0151727		-0.0572	-0.00558172		-0.00909061	-0.0249566	-0.019959
-0.057	0.00257137		0.00652214	0.00823477	0.00482759		-0.057	0.00583645		0.00161844	0.00608154	0.00405256		-0.057	-0.00883589		-0.0220996	-0.0227512	-0.0151613		-0.057	-0.00554432		-0.00908576	-0.0249211	-0.0199363
-0.0568	0.00256853		0.00657282	0.00827225	0.00483794		-0.0568	0.00586434		0.00162348	0.00614095	0.00407527		-0.0568	-0.00883873		-0.022049	-0.0227137	-0.0151509		-0.0568	-0.00551644		-0.00908072	-0.0248617	-0.0199136
-0.0566	0.00256296		0.00663395	0.00831929	0.00484771		-0.0566	0.00587806		0.00162985	0.00620419	0.0040946		-0.0566	-0.0088443		-0.0219878	-0.0226667	-0.0151412		-0.0566	-0.00550271		-0.00907435	-0.0247985	-0.0198943
-0.0564	0.00255742		0.00669438	0.00837657	0.00485713		-0.0564	0.00588309		0.00163693	0.00626475	0.00411949		-0.0564	-0.00884985		-0.0219274	-0.0226094	-0.0151317		-0.0564	-0.00549768		-0.00906727	-0.0247379	-0.0198694
-0.0562	0.00255176		0.00675307	0.00842824	0.0048644		-0.0562	0.00590251		0.0016465	0.00632338	0.00414534		-0.0562	-0.0088555		-0.0218687	-0.0225577	-0.0151245		-0.0562	-0.00547826		-0.00905769	-0.0246793	-0.0198435
-0.056	0.00254808		0.00680251	0.00847505	0.00487232		-0.056	0.00592829		0.00165103	0.00636955	0.00417276		-0.056	-0.00885918		-0.0218193	-0.0225109	-0.0151165		-0.056	-0.00545248		-0.00905317	-0.0246331	-0.0198161
-0.0558	0.00254376		0.00683798	0.00851123	0.0048828		-0.0558	0.00596543		0.00165762	0.00641853	0.00419737		-0.0558	-0.0088635		-0.0217838	-0.0224747	-0.0151061		-0.0558	-0.00541534		-0.00904658	-0.0245841	-0.0197915
-0.0556	0.00253905		0.00686067	0.0085442	0.0048893		-0.0556	0.00600456		0.00166527	0.00648501	0.00422287		-0.0556	-0.00886822		-0.0217611	-0.0224418	-0.0150996		-0.0556	-0.00537621		-0.00903893	-0.0245177	-0.019766
-0.0554	0.00253603		0.0068721	0.00859608	0.00489895		-0.0554	0.00604807		0.00167044	0.0065636	0.00424873		-0.0554	-0.00887123		-0.0217497	-0.0223899	-0.0150899		-0.0554	-0.0053327		-0.00903375	-0.0244391	-0.0197401
-0.0552	0.00253354		0.00688881	0.00864595	0.00490623		-0.0552	0.00608111		0.00167859	0.00663419	0.00428262		-0.0552	-0.00887372		-0.021733	-0.02234	-0.0150826		-0.0552	-0.00529966		-0.0090256	-0.0243685	-0.0197062
-0.055	0.00253184		0.00691744	0.00872496	0.00491257		-0.055	0.00610304		0.00168507	0.00669348	0.00432205		-0.055	-0.00887543		-0.0217043	-0.022261	-0.0150763		-0.055	-0.00527773		-0.00901912	-0.0243092	-0.0196668
-0.0548	0.00253036		0.00695057	0.00881178	0.00492013		-0.0548	0.00610912		0.00169002	0.00672355	0.00437349		-0.0548	-0.0088769		-0.0216712	-0.0221742	-0.0150687		-0.0548	-0.00527165		-0.00901418	-0.0242791	-0.0196154
-0.0546	0.0025294		0.00697789	0.00889413	0.00492776		-0.0546	0.00609854		0.00169562	0.0067331	0.00442362		-0.0546	-0.00887786		-0.0216439	-0.0220918	-0.0150611		-0.0546	-0.00528223		-0.00900858	-0.0242696	-0.0195652
-0.0544	0.00252945		0.00699959	0.00896566	0.00493323		-0.0544	0.00608719		0.0017019	0.00675405	0.00447666		-0.0544	-0.00887781		-0.0216222	-0.0220203	-0.0150556		-0.0544	-0.00529358		-0.0090023	-0.0242486	-0.0195122
-0.0542	0.00252962		0.00703591	0.00902859	0.00494023		-0.0542	0.00608215		0.00170846	0.00678996	0.00452939		-0.0542	-0.00887764		-0.0215859	-0.0219574	-0.0150486		-0.0542	-0.00529862		-0.00899574	-0.0242127	-0.0194595
-0.054	0.00253052		0.00708022	0.00909366	0.00494867		-0.054	0.0060831		0.00171376	0.00683595	0.00458323		-0.054	-0.00887674		-0.0215416	-0.0218923	-0.0150402		-0.054	-0.00529767		-0.00899043	-0.0241667	-0.0194056
-0.0538	0.00253137		0.00712853	0.00917629	0.00495569		-0.0538	0.00609537		0.00172173	0.00688396	0.00463226		-0.0538	-0.00887589		-0.0214932	-0.0218097	-0.0150332		-0.0538	-0.0052854		-0.00898247	-0.0241187	-0.0193566
-0.0536	0.00253317		0.00716044	0.00927438	0.00496222		-0.0536	0.00611538		0.00173222	0.00693732	0.00468059		-0.0536	-0.00887409		-0.0214613	-0.0217116	-0.0150266		-0.0536	-0.00526539		-0.00897198	-0.0240653	-0.0193083
-0.0534	0.0025314		0.00717386	0.00935297	0.00497174		-0.0534	0.00612247		0.00174204	0.00698411	0.00472824		-0.0534	-0.00887586		-0.0214479	-0.021633	-0.0150171		-0.0534	-0.00525831		-0.00896215	-0.0240186	-0.0192606
-0.0532	0.00252952		0.00720578	0.00941076	0.00497845		-0.0532	0.00612159		0.00175443	0.00701679	0.00476494		-0.0532	-0.00887774		-0.021416	-0.0215752	-0.0150104		-0.0532	-0.00525918		-0.00894977	-0.0239859	-0.0192239
-0.053	0.00252867		0.00724254	0.00946703	0.00498789		-0.053	0.00611482		0.00176751	0.00704897	0.00479184		-0.053	-0.00887859		-0.0213792	-0.0215189	-0.015001		-0.053	-0.00526595		-0.00893669	-0.0239537	-0.019197
-0.0528	0.00252841		0.00728306	0.00952681	0.00499782		-0.0528	0.00611379		0.00178346	0.00707609	0.00482785		-0.0528	-0.00887886		-0.0213387	-0.0214592	-0.014991		-0.0528	-0.00526698		-0.00892074	-0.0239266	-0.019161
-0.0526	0.00252693		0.00731748	0.00959209	0.00500636		-0.0526	0.00611124		0.00179916	0.00710088	0.0048593		-0.0526	-0.00888033		-0.0213043	-0.0213939	-0.0149825		-0.0526	-0.00526953		-0.00890504	-0.0239018	-0.0191296
-0.0524	0.00252455		0.00734486	0.009655	0.00501413		-0.0524	0.00611199		0.00181468	0.00711804	0.00489555		-0.0524	-0.00888271		-0.0212769	-0.021331	-0.0149747		-0.0524	-0.00526878		-0.00888952	-0.0238846	-0.0190933
-0.0522	0.00252285		0.00736807	0.00971488	0.00502203		-0.0522	0.00611451		0.00182943	0.00713412	0.00493027		-0.0522	-0.00888441		-0.0212537	-0.0212711	-0.0149668		-0.0522	-0.00526626		-0.00887477	-0.0238685	-0.0190586
-0.052	0.00252039		0.0073817	0.00976344	0.00502792		-0.052	0.00611764		0.00184736	0.00714977	0.00496413		-0.052	-0.00888687		-0.0212401	-0.0212225	-0.0149609		-0.052	-0.00526313		-0.00885684	-0.0238529	-0.0190247
-0.0518	0.00251968		0.00738483	0.00981273	0.00503437		-0.0518	0.00612188		0.0018618	0.00717301	0.00499786		-0.0518	-0.00888759		-0.0212369	-0.0211732	-0.0149545		-0.0518	-0.00525889		-0.0088424	-0.0238297	-0.018991
-0.0516	0.00251669		0.00739313	0.0098667	0.00503846		-0.0516	0.00613037		0.00187499	0.00720202	0.00503229		-0.0516	-0.00889057		-0.0212286	-0.0211193	-0.0149504		-0.0516	-0.00525041		-0.0088292	-0.0238006	-0.0189566
-0.0514	0.00251261		0.00741228	0.00992712	0.00504561		-0.0514	0.00614098		0.0018875	0.00723634	0.00506691		-0.0514	-0.00889465		-0.0212095	-0.0210588	-0.0149432		-0.0514	-0.00523979		-0.0088167	-0.0237663	-0.018922
-0.0512	0.0025109		0.00743332	0.00999666	0.00505513		-0.0512	0.00614896		0.0018954	0.00727747	0.00509826		-0.0512	-0.00889636		-0.0211885	-0.0209893	-0.0149337		-0.0512	-0.00523181		-0.0088088	-0.0237252	-0.0188906
-0.051	0.00250915		0.00745922	0.010064	0.00506334		-0.051	0.00615124		0.00190249	0.00732767	0.00512448		-0.051	-0.00889811		-0.0211626	-0.0209219	-0.0149255		-0.051	-0.00522953		-0.00880171	-0.023675	-0.0188644
-0.0508	0.00250951		0.00749375	0.0101302	0.00507377		-0.0508	0.0061586		0.00191021	0.00737163	0.00514843		-0.0508	-0.00889775		-0.021128	-0.0208557	-0.0149151		-0.0508	-0.00522217		-0.00879398	-0.023631	-0.0188404
-0.0506	0.00251297		0.00752971	0.0101908	0.00508607		-0.0506	0.00617029		0.00191638	0.0074071	0.00516777		-0.0506	-0.00889429		-0.0210921	-0.0207952	-0.0149028		-0.0506	-0.00521049		-0.00878782	-0.0235956	-0.0188211
-0.0504	0.002518		0.00756099	0.0102425	0.00509776		-0.0504	0.00618111		0.00192937	0.00742649	0.00518133		-0.0504	-0.00888926		-0.0210608	-0.0207435	-0.0148911		-0.0504	-0.00519967		-0.00877483	-0.0235762	-0.0188075
-0.0502	0.00252368		0.00759501	0.0102976	0.00511081		-0.0502	0.00619188		0.00194231	0.00744297	0.00518898		-0.0502	-0.00888358		-0.0210268	-0.0206883	-0.014878		-0.0502	-0.00518889		-0.00876189	-0.0235597	-0.0187999
-0.05	0.00252924		0.00763087	0.0103649	0.00512221		-0.05	0.00619683		0.00195649	0.00746607	0.00519583		-0.05	-0.00887802		-0.0209909	-0.0206211	-0.0148666		-0.05	-0.00518394		-0.00874771	-0.0235366	-0.018793
-0.0498	0.00253858		0.00767017	0.0104155	0.00513332		-0.0498	0.00620071		0.00197694	0.00749984	0.00520292		-0.0498	-0.00886868		-0.0209516	-0.0205705	-0.0148555		-0.0498	-0.00518007		-0.00872725	-0.0235028	-0.0187859
-0.0496	0.00255181		0.0077011	0.0104978	0.00514466		-0.0496	0.0062034		0.00199599	0.00754436	0.00521031		-0.0496	-0.00885545		-0.0209207	-0.0204882	-0.0148442		-0.0496	-0.00517737		-0.0087082	-0.0234583	-0.0187786
-0.0494	0.00256564		0.00776753	0.0106205	0.00515527		-0.0494	0.00621084		0.00201566	0.00760276	0.00521873		-0.0494	-0.00884162		-0.0208542	-0.0203654	-0.0148336		-0.0494	-0.00516993		-0.00868854	-0.0233999	-0.0187701
-0.0492	0.00257551		0.00785414	0.0107609	0.00516638		-0.0492	0.00622193		0.00203438	0.00768242	0.0052322		-0.0492	-0.00883175		-0.0207676	-0.0202251	-0.0148225		-0.0492	-0.00515885		-0.00866982	-0.0233202	-0.0187567
-0.049	0.00258446		0.00797149	0.0108891	0.00517823		-0.049	0.00622905		0.00205319	0.00778465	0.00525365		-0.049	-0.0088228		-0.0206503	-0.0200968	-0.0148106		-0.049	-0.00515172		-0.00865101	-0.023218	-0.0187352
-0.0488	0.00259067		0.00809821	0.010976	0.0051905		-0.0488	0.00623432		0.00207102	0.00788379	0.00527166		-0.0488	-0.00881659		-0.0205236	-0.02001	-0.0147984		-0.0488	-0.00514645		-0.00863318	-0.0231189	-0.0187172
-0.0486	0.00259418		0.00820036	0.0110367	0.00520191		-0.0486	0.00623418		0.00208546	0.00797663	0.00529452		-0.0486	-0.00881308		-0.0204214	-0.0199492	-0.0147869		-0.0486	-0.0051466		-0.00861874	-0.023026	-0.0186943
-0.0484	0.00259843		0.00826765	0.0111003	0.00521353		-0.0484	0.00623119		0.0020974	0.00806166	0.00531883		-0.0484	-0.00880884		-0.0203541	-0.0198857	-0.0147753		-0.0484	-0.00514958		-0.0086068	-0.022941	-0.01867
-0.0482	0.00260166		0.00833938	0.0111671	0.0052306		-0.0482	0.00622645		0.00211003	0.00811373	0.00534508		-0.0482	-0.0088056		-0.0202824	-0.0198189	-0.0147583		-0.0482	-0.00515433		-0.00859417	-0.0228889	-0.0186438
-0.048	0.00260457		0.00841859	0.0112193	0.00524886		-0.048	0.00621859		0.00211839	0.00816028	0.00537712		-0.048	-0.00880269		-0.0202032	-0.0197667	-0.01474		-0.048	-0.00516218		-0.00858581	-0.0228424	-0.0186117
-0.0478	0.00260838		0.00852509	0.0112813	0.00526518		-0.0478	0.00621147		0.00212753	0.00822891	0.00539999		-0.0478	-0.00879888		-0.0200967	-0.0197046	-0.0147237		-0.0478	-0.0051693		-0.00857667	-0.0227738	-0.0185889
-0.0476	0.00261214		0.00864209	0.0113222	0.00527976		-0.0476	0.00620077		0.00213586	0.00830653	0.00542902		-0.0476	-0.00879513		-0.0199797	-0.0196638	-0.0147091		-0.0476	-0.00518		-0.00856833	-0.0226961	-0.0185598
-0.0474	0.00261632		0.00876649	0.0113694	0.00529179		-0.0474	0.00618721		0.00215196	0.00838912	0.0054644		-0.0474	-0.00879094		-0.0198553	-0.0196166	-0.0146971		-0.0474	-0.00519356		-0.00855224	-0.0226135	-0.0185245
-0.0472	0.00262194		0.00888669	0.0114171	0.00529797		-0.0472	0.00617414		0.00217007	0.00846924	0.00549917		-0.0472	-0.00878532		-0.0197351	-0.0195689	-0.0146909		-0.0472	-0.00520663		-0.00853413	-0.0225334	-0.0184897
-0.047	0.00262594		0.00898669	0.0114952	0.00530535		-0.047	0.00616449		0.00219149	0.00854028	0.0055362		-0.047	-0.00878132		-0.0196351	-0.0194907	-0.0146835		-0.047	-0.00521628		-0.00851271	-0.0224624	-0.0184527
-0.0468	0.00263047		0.00906191	0.0115764	0.00531272		-0.0468	0.00615825		0.00221203	0.00860226	0.00557067		-0.0468	-0.0087768		-0.0195599	-0.0194096	-0.0146761		-0.0468	-0.00522252		-0.00849217	-0.0224004	-0.0184182
-0.0466	0.00263102		0.00911472	0.0116477	0.00531976		-0.0466	0.00616045		0.00223345	0.00871286	0.00559982		-0.0466	-0.00877625		-0.0195071	-0.0193383	-0.0146691		-0.0466	-0.00522032		-0.00847075	-0.0222898	-0.018389
-0.0464	0.00263114		0.00916398	0.0117034	0.00533058		-0.0464	0.00617054		0.00224833	0.00883126	0.00562482		-0.0464	-0.00877612		-0.0194578	-0.0192825	-0.0146583		-0.0464	-0.00521024		-0.00845587	-0.0221714	-0.018364
-0.0462	0.00263322		0.00923814	0.0117622	0.0053413		-0.0462	0.00618446		0.00226593	0.00896276	0.00564871		-0.0462	-0.00877405		-0.0193836	-0.0192237	-0.0146476		-0.0462	-0.00519631		-0.00843827	-0.0220399	-0.0183402
-0.046	0.00263724		0.00932877	0.011831	0.00535849		-0.046	0.00619864		0.0022906	0.00908098	0.00567689		-0.046	-0.00877002		-0.019293	-0.019155	-0.0146304		-0.046	-0.00518213		-0.0084136	-0.0219217	-0.018312
-0.0458	0.00264154		0.00942631	0.0119043	0.00537853		-0.0458	0.00621452		0.00231658	0.00920541	0.00571523		-0.0458	-0.00876572		-0.0191955	-0.0190816	-0.0146103		-0.0458	-0.00516625		-0.00838761	-0.0217973	-0.0182736
-0.0456	0.00264783		0.00951746	0.011966	0.00540256		-0.0456	0.006227		0.00234358	0.00932436	0.00575937		-0.0456	-0.00875943		-0.0191043	-0.0190199	-0.0145863		-0.0456	-0.00515377		-0.00836062	-0.0216783	-0.0182295
-0.0454	0.002655		0.00959689	0.0120199	0.00542995		-0.0454	0.00623086		0.00237454	0.00941437	0.00581849		-0.0454	-0.00875226		-0.0190249	-0.0189661	-0.0145589		-0.0454	-0.00514991		-0.00832966	-0.0215883	-0.0181704
-0.0452	0.00266061		0.00965757	0.0120867	0.0054614		-0.0452	0.00623872		0.00240234	0.00955911	0.00587741		-0.0452	-0.00874665		-0.0189642	-0.0188992	-0.0145275		-0.0452	-0.00514205		-0.00830186	-0.0214436	-0.0181115
-0.045	0.00266635		0.0097026	0.0121704	0.00548906		-0.045	0.00624792		0.00242273	0.00971229	0.00594883		-0.045	-0.00874091		-0.0189192	-0.0188156	-0.0144998		-0.045	-0.00513286		-0.00828147	-0.0212904	-0.01804
-0.0448	0.0026679		0.00973896	0.0122579	0.00551329		-0.0448	0.00625324		0.00244594	0.00989813	0.00601685		-0.0448	-0.00873936		-0.0188828	-0.0187281	-0.0144756		-0.0448	-0.00512754		-0.00825825	-0.0211045	-0.017972
-0.0446	0.00266971		0.00976982	0.0123477	0.00553282		-0.0446	0.006255		0.00249469	0.0100834	0.00608049		-0.0446	-0.00873755		-0.018852	-0.0186383	-0.014456		-0.0446	-0.00512577		-0.00820951	-0.0209193	-0.0179084
-0.0444	0.00266909		0.00979656	0.0124148	0.00555093		-0.0444	0.0062553		0.00255436	0.0102234	0.00613282		-0.0444	-0.00873817		-0.0188252	-0.0185711	-0.0144379		-0.0444	-0.00512548		-0.00814983	-0.0207793	-0.017856
-0.0442	0.00266839		0.00982708	0.012452	0.00557344		-0.0442	0.00625633		0.00261288	0.0103669	0.00616356		-0.0442	-0.00873887		-0.0187947	-0.0185339	-0.0144154		-0.0442	-0.00512444		-0.00809131	-0.0206358	-0.0178253
-0.044	0.00266625		0.00986079	0.0125094	0.0056036		-0.044	0.00624373		0.00265864	0.0105413	0.00619914		-0.044	-0.00874101		-0.018761	-0.0184766	-0.0143853		-0.044	-0.00513704		-0.00804555	-0.0204614	-0.0177897
-0.0438	0.00266325		0.0098998	0.0125914	0.00563563		-0.0438	0.00622749		0.00268437	0.0106926	0.00624418		-0.0438	-0.00874401		-0.018722	-0.0183945	-0.0143532		-0.0438	-0.00515328		-0.00801983	-0.02031	-0.0177447
-0.0436	0.00266156		0.00994739	0.0127018	0.00566551		-0.0436	0.00621829		0.00270988	0.010826	0.00629143		-0.0436	-0.0087457		-0.0186744	-0.0182841	-0.0143233		-0.0436	-0.00516248		-0.00799432	-0.0201767	-0.0176974
-0.0434	0.00265922		0.0100054	0.0128564	0.00569844		-0.0434	0.00622994		0.00275089	0.010913	0.00634155		-0.0434	-0.00874804		-0.0186163	-0.0181295	-0.0142904		-0.0434	-0.00515083		-0.00795331	-0.0200897	-0.0176473
-0.0432	0.00265845		0.0100655	0.0130271	0.00573684		-0.0432	0.00624615		0.00279452	0.0110033	0.00639301		-0.0432	-0.00874881		-0.0185563	-0.0179588	-0.014252		-0.0432	-0.00513462		-0.00790968	-0.0199994	-0.0175959
-0.043	0.00265884		0.0101129	0.013172	0.00578053		-0.043	0.0062701		0.00283553	0.0111066	0.00643562		-0.043	-0.00874842		-0.0185089	-0.0178139	-0.0142083		-0.043	-0.00511067		-0.00786867	-0.019896	-0.0175532
-0.0428	0.00265767		0.0101446	0.0133087	0.00582427		-0.0428	0.00630288		0.00291063	0.0112352	0.0064655		-0.0428	-0.00874959		-0.0184772	-0.0176772	-0.0141646		-0.0428	-0.00507789		-0.00779356	-0.0197675	-0.0175234
-0.0426	0.00266028		0.0101797	0.0134545	0.0058657		-0.0426	0.006339		0.00299549	0.0114059	0.00648557		-0.0426	-0.00874698		-0.0184421	-0.0175315	-0.0141232		-0.0426	-0.00504177		-0.00770871	-0.0195968	-0.0175033
-0.0424	0.00266345		0.0102155	0.0135842	0.00590315		-0.0424	0.00636788		0.00306819	0.0115837	0.00651085		-0.0424	-0.00874382		-0.0184063	-0.0174018	-0.0140857		-0.0424	-0.0050129		-0.00763601	-0.019419	-0.017478
-0.0422	0.00266927		0.0102538	0.0136633	0.0059316		-0.0422	0.00638404		0.00311733	0.0117312	0.00654129		-0.0422	-0.008738		-0.018368	-0.0173227	-0.0140573		-0.0422	-0.00499674		-0.00758687	-0.0192714	-0.0174476
-0.042	0.00267403		0.0102885	0.0137199	0.0059601		-0.042	0.00640395		0.00313236	0.0118734	0.00658014		-0.042	-0.00873323		-0.0183333	-0.0172661	-0.0140288		-0.042	-0.00497682		-0.00757184	-0.0191292	-0.0174087
-0.0418	0.00268109		0.0103321	0.013793	0.00598842		-0.0418	0.00643918		0.00316257	0.012027	0.00660981		-0.0418	-0.00872617		-0.0182897	-0.017193	-0.0140004		-0.0418	-0.00494159		-0.00754162	-0.0189757	-0.0173791
-0.0416	0.00268759		0.0103757	0.0139106	0.00601835		-0.0416	0.0064877		0.00320467	0.0121266	0.00663079		-0.0416	-0.00871967		-0.0182461	-0.0170753	-0.0139705		-0.0416	-0.00489307		-0.00749953	-0.018876	-0.0173581
-0.0414	0.00269665		0.0104073	0.0140576	0.00605006		-0.0414	0.00653416		0.00324334	0.0121961	0.00665503		-0.0414	-0.00871061		-0.0182145	-0.0169284	-0.0139388		-0.0414	-0.00484662		-0.00746086	-0.0188066	-0.0173338
-0.0412	0.002707		0.0104316	0.0142078	0.00608799		-0.0412	0.00658067		0.00329346	0.012267	0.00670993		-0.0412	-0.00870026		-0.0181902	-0.0167781	-0.0139009		-0.0412	-0.0048001		-0.00741074	-0.0187356	-0.0172789
-0.041	0.00271973		0.0104603	0.0143531	0.00612921		-0.041	0.00662267		0.00333868	0.0123562	0.00678145		-0.041	-0.00868753		-0.0181615	-0.0166329	-0.0138596		-0.041	-0.0047581		-0.00736552	-0.0186464	-0.0172074
-0.0408	0.00273213		0.0104913	0.014512	0.00617168		-0.0408	0.00665668		0.00338416	0.0124497	0.0068541		-0.0408	-0.00867513		-0.0181305	-0.0164739	-0.0138172		-0.0408	-0.00472409		-0.00732004	-0.018553	-0.0171348
-0.0406	0.0027444		0.010527	0.0146649	0.00621182		-0.0406	0.00667237		0.0034139	0.0125465	0.00692033		-0.0406	-0.00866286		-0.0180948	-0.0163211	-0.013777		-0.0406	-0.0047084		-0.0072903	-0.0184561	-0.0170685
-0.0404	0.00275872		0.0105684	0.0148088	0.00624743		-0.0404	0.00667535		0.00342978	0.0126446	0.00697363		-0.0404	-0.00864854		-0.0180534	-0.0161771	-0.0137414		-0.0404	-0.00470543		-0.00727442	-0.018358	-0.0170152
-0.0402	0.00277452		0.0106072	0.0149279	0.00627646		-0.0402	0.00668943		0.00344285	0.0127341	0.00704555		-0.0402	-0.00863274		-0.0180145	-0.016058	-0.0137124		-0.0402	-0.00469134		-0.00726134	-0.0182685	-0.0169433
-0.04	0.00279096		0.0106594	0.0150029	0.00630607		-0.04	0.00671544		0.00346299	0.012803	0.00715978		-0.04	-0.0086163		-0.0179623	-0.0159831	-0.0136828		-0.04	-0.00466533		-0.0072412	-0.0181996	-0.0168291
-0.0398	0.00280585		0.0107204	0.0150536	0.00633532		-0.0398	0.00674361		0.00348518	0.0128691	0.00730678		-0.0398	-0.00860141		-0.0179014	-0.0159323	-0.0136535		-0.0398	-0.00463716		-0.00721902	-0.0181335	-0.0166821
-0.0396	0.00281793		0.0107602	0.0151065	0.00638041		-0.0396	0.00677003		0.00351279	0.0129463	0.00743241		-0.0396	-0.00858933		-0.0178616	-0.0158795	-0.0136085		-0.0396	-0.00461074		-0.00719141	-0.0180564	-0.0165565
-0.0394	0.00283201		0.0107851	0.0151847	0.00643889		-0.0394	0.0067946		0.00354206	0.0130439	0.00754506		-0.0394	-0.00857525		-0.0178367	-0.0158013	-0.01355		-0.0394	-0.00458617		-0.00716214	-0.0179587	-0.0164438
-0.0392	0.00284444		0.0108299	0.0152913	0.0065035		-0.0392	0.00681745		0.00357233	0.013104	0.00766045		-0.0392	-0.00856282		-0.0177919	-0.0156946	-0.0134854		-0.0392	-0.00456332		-0.00713187	-0.0178987	-0.0163284
-0.039	0.00285891		0.010878	0.0153806	0.00656348		-0.039	0.00683986		0.00359962	0.013146	0.00777029		-0.039	-0.00854836		-0.0177438	-0.0156054	-0.0134254		-0.039	-0.00454091		-0.00710457	-0.0178566	-0.0162186
-0.0388	0.00287109		0.0109344	0.0154905	0.00661416		-0.0388	0.00686143		0.00361662	0.0131823	0.00786734		-0.0388	-0.00853617		-0.0176874	-0.0154955	-0.0133747		-0.0388	-0.00451934		-0.00708758	-0.0178203	-0.0161215
-0.0386	0.00287665		0.0109933	0.0156209	0.00665619		-0.0386	0.00688257		0.0036231	0.0132156	0.0079604		-0.0386	-0.00853061		-0.0176285	-0.0153651	-0.0133327		-0.0386	-0.0044982		-0.0070811	-0.017787	-0.0160285
-0.0384	0.00288515		0.0110681	0.0157441	0.00669432		-0.0384	0.00690796		0.00364296	0.0132617	0.00803785		-0.0384	-0.00852211		-0.0175537	-0.0152419	-0.0132945		-0.0384	-0.00447281		-0.00706124	-0.017741	-0.015951
-0.0382	0.00289519		0.011153	0.0158502	0.00672938		-0.0382	0.00693714		0.00366487	0.0133076	0.00809485		-0.0382	-0.00851207		-0.0174687	-0.0151358	-0.0132595		-0.0382	-0.00444363		-0.00703933	-0.0176951	-0.015894
-0.038	0.00290791		0.0112306	0.0159274	0.00675583		-0.038	0.00696615		0.00369349	0.0133583	0.00816968		-0.038	-0.00849935		-0.0173912	-0.0150586	-0.013233		-0.038	-0.00441462		-0.00701071	-0.0176444	-0.0158192
-0.0378	0.00292251		0.0112827	0.0160039	0.00678616		-0.0378	0.00699421		0.00372771	0.01341	0.00825696		-0.0378	-0.00848475		-0.0173391	-0.014982	-0.0132027		-0.0378	-0.00438656		-0.00697649	-0.0175926	-0.0157319
-0.0376	0.00293468		0.011326	0.0160777	0.00682356		-0.0376	0.00702504		0.00376418	0.0134616	0.00834773		-0.0376	-0.00847258		-0.0172958	-0.0149082	-0.0131653		-0.0376	-0.00435573		-0.00694002	-0.017541	-0.0156411
-0.0374	0.00294642		0.0114012	0.0161487	0.00688944		-0.0374	0.00706033		0.00379498	0.0134945	0.00843765		-0.0374	-0.00846085		-0.0172206	-0.0148373	-0.0130994		-0.0374	-0.00432044		-0.00690922	-0.0175082	-0.0155512
-0.0372	0.00295566		0.0114973	0.0162088	0.00696831		-0.0372	0.0071036		0.00381447	0.013537	0.00853693		-0.0372	-0.0084516		-0.0171245	-0.0147772	-0.0130205		-0.0372	-0.00427717		-0.00688973	-0.0174657	-0.0154519
-0.037	0.00296791		0.0115852	0.0162617	0.00704543		-0.037	0.00714778		0.00382574	0.0136056	0.00864035		-0.037	-0.00843935		-0.0170366	-0.0147243	-0.0129434		-0.037	-0.00423299		-0.00687846	-0.0173971	-0.0153485
-0.0368	0.00298193		0.0116537	0.016307	0.00710917		-0.0368	0.00718922		0.00384525	0.0137051	0.00874912		-0.0368	-0.00842533		-0.016968	-0.0146789	-0.0128797		-0.0368	-0.00419155		-0.00685895	-0.0172975	-0.0152397
-0.0366	0.0030008		0.011701	0.0163562	0.00716759		-0.0366	0.00723211		0.00387772	0.0138548	0.00884353		-0.0366	-0.00840646		-0.0169208	-0.0146297	-0.0128213		-0.0366	-0.00414866		-0.00682647	-0.0171478	-0.0151453
-0.0364	0.00302238		0.0117611	0.0164037	0.00720035		-0.0364	0.00726291		0.0039146	0.0140334	0.00892446		-0.0364	-0.00838488		-0.0168606	-0.0145822	-0.0127885		-0.0364	-0.00411786		-0.0067896	-0.0169693	-0.0150644
-0.0362	0.00304658		0.011848	0.0164424	0.00723028		-0.0362	0.00728099		0.00394826	0.0142103	0.00898772		-0.0362	-0.00836068		-0.0167738	-0.0145435	-0.0127586		-0.0362	-0.00409978		-0.00675594	-0.0167924	-0.0150011
-0.036	0.00306957		0.0119286	0.0164973	0.00726471		-0.036	0.00730902		0.00398059	0.0143659	0.00904153		-0.036	-0.00833769		-0.0166932	-0.0144886	-0.0127242		-0.036	-0.00407175		-0.00672361	-0.0166368	-0.0149473
-0.0358	0.00309055		0.0120078	0.0165711	0.00730924		-0.0358	0.00734606		0.0040052	0.0144892	0.00911505		-0.0358	-0.00831672		-0.016614	-0.0144148	-0.0126796		-0.0358	-0.00403471		-0.006699	-0.0165135	-0.0148738
-0.0356	0.00310735		0.0120989	0.0166542	0.00736101		-0.0356	0.0073931		0.00402589	0.0145781	0.00916694		-0.0356	-0.00829992		-0.0165229	-0.0143318	-0.0126278		-0.0356	-0.00398767		-0.00667831	-0.0164245	-0.0148219
-0.0354	0.00311948		0.0121756	0.0167447	0.00741806		-0.0354	0.00744231		0.00404253	0.0146574	0.00921735		-0.0354	-0.00828778		-0.0164462	-0.0142413	-0.0125708		-0.0354	-0.00393846		-0.00666167	-0.0163453	-0.0147715
-0.0352	0.00313465		0.0122332	0.0168242	0.00750089		-0.0352	0.00748982		0.00404828	0.0147751	0.00926754		-0.0352	-0.00827261		-0.0163886	-0.0141617	-0.012488		-0.0352	-0.00389095		-0.00665592	-0.0162276	-0.0147213
-0.035	0.0031564		0.0122749	0.0168728	0.00757575		-0.035	0.00753209		0.00405731	0.0149096	0.00932267		-0.035	-0.00825086		-0.0163468	-0.0141131	-0.0124131		-0.035	-0.00384868		-0.00664689	-0.0160931	-0.0146662
-0.0348	0.003177		0.0123239	0.0169313	0.00763292		-0.0348	0.0075653		0.0040687	0.0150414	0.00937948		-0.0348	-0.00823026		-0.0162979	-0.0140547	-0.0123559		-0.0348	-0.00381547		-0.0066355	-0.0159613	-0.0146094
-0.0346	0.00319471		0.0124002	0.0170002	0.00768057		-0.0346	0.00760716		0.00407977	0.0151894	0.009422		-0.0346	-0.00821255		-0.0162216	-0.0139857	-0.0123083		-0.0346	-0.00377361		-0.00662443	-0.0158132	-0.0145669
-0.0344	0.00321205		0.0124703	0.0170797	0.00777428		-0.0344	0.00765033		0.00409323	0.0153147	0.00949508		-0.0344	-0.00819521		-0.0161515	-0.0139063	-0.0122146		-0.0344	-0.00373044		-0.00661097	-0.0156879	-0.0144938
-0.0342	0.00323118		0.0125305	0.0171505	0.00788147		-0.0342	0.0076842		0.00410314	0.0154415	0.00958963		-0.0342	-0.00817608		-0.0160913	-0.0138355	-0.0121074		-0.0342	-0.00369657		-0.00660106	-0.0155611	-0.0143992
-0.034	0.00324814		0.0125991	0.0171964	0.00797739		-0.034	0.00772339		0.00411309	0.0155654	0.00967899		-0.034	-0.00815912		-0.0160227	-0.0137895	-0.0120115		-0.034	-0.00365738		-0.0065911	-0.0154373	-0.0143099
-0.0338	0.00327144		0.0126589	0.0172388	0.00806962		-0.0338	0.00776335		0.00411969	0.0156558	0.00978602		-0.0338	-0.00813583		-0.0159629	-0.0137471	-0.0119192		-0.0338	-0.00361742		-0.0065845	-0.0153468	-0.0142028
-0.0336	0.00329539		0.0127164	0.0172878	0.00815954		-0.0336	0.00779569		0.00412642	0.0157524	0.00991648		-0.0336	-0.00811188		-0.0159054	-0.0136982	-0.0118293		-0.0336	-0.00358508		-0.00657777	-0.0152503	-0.0140724
-0.0334	0.00331941		0.0127631	0.017333	0.00822773		-0.0334	0.00782588		0.00413294	0.0158261	0.0100442		-0.0334	-0.00808785		-0.0158586	-0.013653	-0.0117611		-0.0334	-0.00355489		-0.00657126	-0.0151765	-0.0139446
-0.0332	0.00334639		0.0128068	0.0173764	0.00828513		-0.0332	0.00784697		0.00414096	0.0158702	0.010163		-0.0332	-0.00806087		-0.015815	-0.0136096	-0.0117037		-0.0332	-0.0035338		-0.00656324	-0.0151324	-0.0138259
-0.033	0.00336941		0.0128443	0.0174055	0.00833122		-0.033	0.00785443		0.00414881	0.0159195	0.0102721		-0.033	-0.00803785		-0.0157775	-0.0135805	-0.0116576		-0.033	-0.00352634		-0.00655539	-0.0150831	-0.0137168
-0.0328	0.00339382		0.012889	0.0174291	0.00838171		-0.0328	0.00785432		0.00415939	0.0159873	0.0103693		-0.0328	-0.00801344		-0.0157328	-0.0135569	-0.0116071		-0.0328	-0.00352645		-0.00654481	-0.0150154	-0.0136195
-0.0326	0.00341938		0.0129448	0.017456	0.00843507		-0.0326	0.00785058		0.00416818	0.0160652	0.0104871		-0.0326	-0.00798788		-0.0156769	-0.01353	-0.0115538		-0.0326	-0.00353019		-0.00653602	-0.0149374	-0.0135018
-0.0324	0.00344235		0.0130061	0.0174792	0.00851084		-0.0324	0.00785471		0.00417555	0.0161233	0.0106276		-0.0324	-0.00796492		-0.0156156	-0.0135068	-0.011478		-0.0324	-0.00352606		-0.00652865	-0.0148794	-0.0133613
-0.0322	0.00346483		0.013066	0.0175181	0.00859746		-0.0322	0.00786092		0.00418265	0.0161819	0.0107742		-0.0322	-0.00794243		-0.0155558	-0.0134679	-0.0113914		-0.0322	-0.00351985		-0.00652155	-0.0148207	-0.0132147
-0.032	0.00348826		0.0131158	0.0175674	0.00868557		-0.032	0.00786532		0.00418925	0.0162318	0.0109072		-0.032	-0.00791901		-0.015506	-0.0134186	-0.0113033		-0.032	-0.00351545		-0.00651495	-0.0147708	-0.0130817
-0.0318	0.00351219		0.0131632	0.0176251	0.00877475		-0.0318	0.00787658		0.00419612	0.0162869	0.0110033		-0.0318	-0.00789507		-0.0154586	-0.0133608	-0.0112141		-0.0318	-0.00350419		-0.00650808	-0.0147158	-0.0129855
-0.0316	0.00353596		0.0132031	0.0176826	0.00887106		-0.0316	0.00789109		0.00420425	0.0163429	0.0110803		-0.0316	-0.0078713		-0.0154186	-0.0133034	-0.0111178		-0.0316	-0.00348968		-0.00649994	-0.0146598	-0.0129086
-0.0314	0.0035567		0.013236	0.0177434	0.00896041		-0.0314	0.00790197		0.00421512	0.0163897	0.0111528		-0.0314	-0.00785056		-0.0153858	-0.0132426	-0.0110284		-0.0314	-0.0034788		-0.00648908	-0.014613	-0.0128361
-0.0312	0.00357674		0.0132672	0.0178184	0.00903465		-0.0312	0.00791576		0.00422919	0.0164485	0.0112198		-0.0312	-0.00783052		-0.0153545	-0.0131676	-0.0109542		-0.0312	-0.00346501		-0.00647501	-0.0145542	-0.012769
-0.031	0.00359247		0.0133043	0.0179031	0.00908163		-0.031	0.00792782		0.00424843	0.0165231	0.0112868		-0.031	-0.00781479		-0.0153175	-0.0130828	-0.0109072		-0.031	-0.00345295		-0.00645577	-0.0144796	-0.0127021
-0.0308	0.0036062		0.0133582	0.0179669	0.00913145		-0.0308	0.00794473		0.00427162	0.0166033	0.0113635		-0.0308	-0.00780106		-0.0152636	-0.013019	-0.0108574		-0.0308	-0.00343604		-0.00643258	-0.0143994	-0.0126254
-0.0306	0.00362878		0.0134205	0.0180275	0.00919885		-0.0306	0.00796324		0.00429522	0.016686	0.0114447		-0.0306	-0.00777848		-0.0152013	-0.0129585	-0.01079		-0.0306	-0.00341753		-0.00640898	-0.0143167	-0.0125442
-0.0304	0.00365866		0.0134857	0.0180924	0.00928028		-0.0304	0.00797291		0.00431253	0.0167574	0.0115167		-0.0304	-0.0077486		-0.0151361	-0.0128935	-0.0107086		-0.0304	-0.00340786		-0.00639167	-0.0142453	-0.0124722
-0.0302	0.00370033		0.0135543	0.0181418	0.00937204		-0.0302	0.00798148		0.00432151	0.0167992	0.011605		-0.0302	-0.00770693		-0.0150675	-0.0128442	-0.0106168		-0.0302	-0.00339929		-0.00638269	-0.0142035	-0.0123839
-0.03	0.00375157		0.0136113	0.0181883	0.00945065		-0.03	0.00799411		0.00433461	0.0168693	0.0117314		-0.03	-0.00765569		-0.0150105	-0.0127977	-0.0105382		-0.03	-0.00338666		-0.00636959	-0.0141333	-0.0122575
-0.0298	0.00379434		0.013676	0.0182527	0.00952062		-0.0298	0.00800234		0.00436457	0.0169349	0.0118506		-0.0298	-0.00761292		-0.0149458	-0.0127332	-0.0104682		-0.0298	-0.00337843		-0.00633963	-0.0140678	-0.0121383
-0.0296	0.00383126		0.0137836	0.0183313	0.00957256		-0.0296	0.00800539		0.00440358	0.0170056	0.0119285		-0.0296	-0.007576		-0.0148382	-0.0126546	-0.0104163		-0.0296	-0.00337538		-0.00630062	-0.0139971	-0.0120603
-0.0294	0.0038551		0.0138884	0.0184083	0.00962312		-0.0294	0.00800842		0.00444179	0.0171148	0.0120002		-0.0294	-0.00755216		-0.0147334	-0.0125777	-0.0103657		-0.0294	-0.00337235		-0.00626241	-0.0138879	-0.0119886
-0.0292	0.00388785		0.0140044	0.018468	0.00965224		-0.0292	0.00801129		0.00446212	0.0172485	0.0120672		-0.0292	-0.00751941		-0.0146174	-0.012518	-0.0103366		-0.0292	-0.00336948		-0.00624208	-0.0137542	-0.0119217
-0.029	0.00392896		0.0141014	0.0185207	0.0097043		-0.029	0.00802137		0.00447969	0.0173852	0.0121529		-0.029	-0.0074783		-0.0145203	-0.0124652	-0.0102846		-0.029	-0.0033594		-0.00622451	-0.0136175	-0.011836
-0.0288	0.00397136		0.0141546	0.0185698	0.00976821		-0.0288	0.00803704		0.00451277	0.0174952	0.0122558		-0.0288	-0.0074359		-0.0144672	-0.0124162	-0.0102206		-0.0288	-0.00334373		-0.00619142	-0.0135075	-0.0117331
-0.0286	0.00400679		0.0142331	0.0186196	0.00983263		-0.0286	0.00805566		0.00455603	0.0175866	0.0123724		-0.0286	-0.00740048		-0.0143887	-0.0123664	-0.0101562		-0.0286	-0.00332511		-0.00614816	-0.0134161	-0.0116165
-0.0284	0.00403841		0.0143386	0.0186741	0.00987892		-0.0284	0.00807195		0.00459366	0.0176632	0.0124891		-0.0284	-0.00736886		-0.0142832	-0.0123119	-0.0101099		-0.0284	-0.00330883		-0.00611053	-0.0133395	-0.0114998
-0.0282	0.00406593		0.0144673	0.0187381	0.00990589		-0.0282	0.00808181		0.0046113	0.0177076	0.0125947		-0.0282	-0.00734134		-0.0141545	-0.0122478	-0.010083		-0.0282	-0.00329896		-0.0060929	-0.0132951	-0.0113942
-0.028	0.0040867		0.0145832	0.0187962	0.00993713		-0.028	0.00809547		0.00462305	0.0177555	0.012679		-0.028	-0.00732056		-0.0140386	-0.0121897	-0.0100517		-0.028	-0.0032853		-0.00608115	-0.0132471	-0.0113099
-0.0278	0.00410575		0.014665	0.0188462	0.00997759		-0.0278	0.00811278		0.00465212	0.0178472	0.0127609		-0.0278	-0.00730151		-0.0139568	-0.0121397	-0.0100113		-0.0278	-0.00326799		-0.00605208	-0.0131555	-0.011228
-0.0276	0.00412415		0.0147615	0.0188964	0.0100315		-0.0276	0.00813301		0.00468855	0.0179781	0.0128464		-0.0276	-0.00728311		-0.0138603	-0.0120895	-0.00995736		-0.0276	-0.00324777		-0.00601564	-0.0130246	-0.0111424
-0.0274	0.00414124		0.0148606	0.0189424	0.0100884		-0.0274	0.00815726		0.00473473	0.0181001	0.0129698		-0.0274	-0.00726602		-0.0137612	-0.0120436	-0.00990042		-0.0274	-0.00322351		-0.00596947	-0.0129026	-0.011019
-0.0272	0.00415804		0.0149724	0.0189821	0.0101457		-0.0272	0.00818589		0.0047775	0.0182253	0.0131176		-0.0272	-0.00724922		-0.0136494	-0.0120039	-0.00984313		-0.0272	-0.00319488		-0.0059267	-0.0127773	-0.0108713
-0.027	0.00418141		0.0150962	0.0190197	0.0102064		-0.027	0.00821276		0.00481337	0.018334	0.0132735		-0.027	-0.00722585		-0.0135256	-0.0119663	-0.00978242		-0.027	-0.00316801		-0.00589083	-0.0126687	-0.0107153
-0.0268	0.0042066		0.0152167	0.019051	0.0102769		-0.0268	0.00823977		0.00483655	0.0184354	0.0134009		-0.0268	-0.00720066		-0.0134051	-0.011935	-0.00971199		-0.0268	-0.003141		-0.00586765	-0.0125673	-0.010588
-0.0266	0.00423863		0.0153408	0.0190842	0.0103525		-0.0266	0.00826466		0.00484683	0.0185402	0.0135201		-0.0266	-0.00716863		-0.013281	-0.0119018	-0.00963638		-0.0266	-0.00311611		-0.00585737	-0.0124624	-0.0104687
-0.0264	0.00426827		0.0154428	0.0191138	0.0104434		-0.0264	0.00828236		0.0048601	0.0186886	0.0136465		-0.0264	-0.00713899		-0.013179	-0.0118721	-0.00954543		-0.0264	-0.00309841		-0.0058441	-0.0123141	-0.0103424
-0.0262	0.00430169		0.0155237	0.0191489	0.0105089		-0.0262	0.00829047		0.00488712	0.0188549	0.0137602		-0.0262	-0.00710558		-0.0130981	-0.0118371	-0.00947995		-0.0262	-0.0030903		-0.00581707	-0.0121477	-0.0102287
-0.026	0.00433027		0.015592	0.0192155	0.0105903		-0.026	0.00829738		0.00491939	0.0189934	0.0138562		-0.026	-0.00707699		-0.0130298	-0.0117704	-0.00939859		-0.026	-0.00308339		-0.0057848	-0.0120093	-0.0101327
-0.0258	0.00435804		0.0156615	0.0193064	0.0107201		-0.0258	0.00831762		0.00495373	0.0191144	0.0139319		-0.0258	-0.00704922		-0.0129603	-0.0116796	-0.0092688		-0.0258	-0.00306315		-0.00575047	-0.0118882	-0.0100569
-0.0256	0.00439209		0.0157503	0.0193825	0.0108616		-0.0256	0.00834936		0.00498218	0.0192443	0.0139814		-0.0256	-0.00701517		-0.0128715	-0.0116035	-0.00912721		-0.0256	-0.00303141		-0.00572202	-0.0117584	-0.0100074
-0.0254	0.00443189		0.0158407	0.0194596	0.0109883		-0.0254	0.0083802		0.00500259	0.0193726	0.0140155		-0.0254	-0.00697537		-0.0127811	-0.0115263	-0.0090006		-0.0254	-0.00300057		-0.00570161	-0.01163	-0.00997336
-0.0252	0.00446929		0.0159164	0.0195424	0.0110836		-0.0252	0.00840721		0.00502647	0.0195131	0.0140427		-0.0252	-0.00693797		-0.0127054	-0.0114436	-0.00890521		-0.0252	-0.00297356		-0.00567773	-0.0114896	-0.0099462
-0.025	0.00450682		0.0159938	0.0196313	0.011167		-0.025	0.00842703		0.00505419	0.0196585	0.0140726		-0.025	-0.00690044		-0.012628	-0.0113546	-0.00882182		-0.025	-0.00295374		-0.00565001	-0.0113442	-0.00991623
-0.0248	0.00452901		0.0160569	0.0197116	0.0112431		-0.0248	0.00843374		0.00507702	0.0198083	0.0141084		-0.0248	-0.00687825		-0.0125649	-0.0112744	-0.00874576		-0.0248	-0.00294703		-0.00562718	-0.0111943	-0.00988043
-0.0246	0.00455544		0.0160945	0.0197834	0.0112993		-0.0246	0.00844218		0.00510383	0.0199325	0.0141543		-0.0246	-0.00685182		-0.0125273	-0.0112025	-0.00868954		-0.0246	-0.00293859		-0.00560037	-0.0110702	-0.00983453
-0.0244	0.00459146		0.0161097	0.0198533	0.0113461		-0.0244	0.00845448		0.00512833	0.0200304	0.0142425		-0.0244	-0.0068158		-0.012512	-0.0111326	-0.00864278		-0.0244	-0.0029263		-0.00557587	-0.0109723	-0.00974641
-0.0242	0.0046347		0.01613	0.0199451	0.0113956		-0.0242	0.00846857		0.00514842	0.0201113	0.0143345		-0.0242	-0.00677256		-0.0124918	-0.0110408	-0.00859326		-0.0242	-0.0029122		-0.00555578	-0.0108914	-0.00965439
-0.024	0.00467288		0.016158	0.0200689	0.0114346		-0.024	0.00848825		0.00516746	0.0202099	0.0144127		-0.024	-0.00673438		-0.0124638	-0.010917	-0.00855425		-0.024	-0.00289252		-0.00553674	-0.0107928	-0.00957615
-0.0238	0.00470562		0.0162142	0.0202116	0.0114765		-0.0238	0.00850962		0.00517633	0.0203068	0.0144536		-0.0238	-0.00670164		-0.0124076	-0.0107743	-0.00851239		-0.0238	-0.00287115		-0.00552787	-0.0106959	-0.00953523
-0.0236	0.0047298		0.0162801	0.0203465	0.0115231		-0.0236	0.00852978		0.00518749	0.0204026	0.0144926		-0.0236	-0.00667746		-0.0123417	-0.0106394	-0.00846576		-0.0236	-0.00285099		-0.00551671	-0.0106001	-0.0094963
-0.0234	0.00475213		0.0163102	0.0204918	0.0115722		-0.0234	0.00855057		0.00520369	0.0205124	0.014548		-0.0234	-0.00665513		-0.0123115	-0.0104942	-0.00841667		-0.0234	-0.0028302		-0.00550051	-0.0104902	-0.00944091
-0.0232	0.00477887		0.0163061	0.020654	0.0116126		-0.0232	0.00856888		0.00522805	0.0206411	0.0145995		-0.0232	-0.00662839		-0.0123156	-0.0103319	-0.00837624		-0.0232	-0.00281189		-0.00547615	-0.0103615	-0.00938941
-0.023	0.00481446		0.0162961	0.0208039	0.011645		-0.023	0.00858973		0.00525437	0.0207616	0.0146384		-0.023	-0.0065928		-0.0123257	-0.0101821	-0.00834387		-0.023	-0.00279104		-0.00544983	-0.0102411	-0.00935043
-0.0228	0.00484862		0.0163203	0.0209083	0.0116614		-0.0228	0.0086229		0.00527888	0.0208727	0.0146821		-0.0228	-0.00655865		-0.0123015	-0.0100777	-0.00832746		-0.0228	-0.00275787		-0.00542532	-0.0101299	-0.00930672
-0.0226	0.00487836		0.0163551	0.0209874	0.0116978		-0.0226	0.00866659		0.00530388	0.0209779	0.01473		-0.0226	-0.00652891		-0.0122667	-0.00999856	-0.00829107		-0.0226	-0.00271418		-0.00540031	-0.0100248	-0.00925892
-0.0224	0.0049057		0.0163747	0.0210464	0.0117324		-0.0224	0.00872604		0.00532378	0.0210693	0.0147974		-0.0224	-0.00650156		-0.0122471	-0.00993955	-0.00825643		-0.0224	-0.00265473		-0.00538042	-0.00993339	-0.00919147
-0.0222	0.00492577		0.0164115	0.0211102	0.0117695		-0.0222	0.00878868		0.00533938	0.0211531	0.0148749		-0.0222	-0.0064815		-0.0122102	-0.00987576	-0.00821936		-0.0222	-0.00259209		-0.00536481	-0.0098496	-0.009114
-0.022	0.00495505		0.0164669	0.021173	0.011814		-0.022	0.00883231		0.00535004	0.0212391	0.0149589		-0.022	-0.00645222		-0.0121548	-0.00981294	-0.00817488		-0.022	-0.00254846		-0.00535416	-0.00976356	-0.00902997
-0.0218	0.00500328		0.0165379	0.0212547	0.0118582		-0.0218	0.00886143		0.00535904	0.0212989	0.015054		-0.0218	-0.00640398		-0.0120838	-0.00973128	-0.0081307		-0.0218	-0.00251934		-0.00534516	-0.00970372	-0.00893491
-0.0216	0.00506535		0.0166156	0.0213433	0.0119007		-0.0216	0.0088737		0.00536953	0.0213751	0.0151384		-0.0216	-0.00634191		-0.0120062	-0.00964268	-0.0080882		-0.0216	-0.00250707		-0.00533467	-0.00962758	-0.00885045
-0.0214	0.00512573		0.0166685	0.02143	0.0119599		-0.0214	0.00888673		0.00538174	0.0214775	0.0151915		-0.0214	-0.00628153		-0.0119532	-0.00955598	-0.00802896		-0.0214	-0.00249404		-0.00532246	-0.00952521	-0.00879732
-0.0212	0.00516869		0.0167135	0.0215158	0.0120312		-0.0212	0.008898		0.00539045	0.0215566	0.0152327		-0.0212	-0.00623857		-0.0119083	-0.00947016	-0.00795771		-0.0212	-0.00248277		-0.00531375	-0.00944606	-0.00875615
-0.021	0.0051974		0.0167806	0.0216048	0.012114		-0.021	0.00890578		0.00539767	0.0216535	0.0152815		-0.021	-0.00620986		-0.0118412	-0.00938114	-0.00787487		-0.021	-0.00247499		-0.00530652	-0.00934922	-0.00870733
-0.0208	0.00522086		0.0168683	0.0216732	0.0121809		-0.0208	0.00892481		0.00540673	0.0217815	0.0153585		-0.0208	-0.0061864		-0.0117535	-0.00931273	-0.00780794		-0.0208	-0.00245596		-0.00529747	-0.00922119	-0.00863039
-0.0206	0.00525518		0.016975	0.0217353	0.0122209		-0.0206	0.00895206		0.00541697	0.021892	0.0154471		-0.0206	-0.00615208		-0.0116468	-0.00925071	-0.00776793		-0.0206	-0.00242871		-0.00528723	-0.00911062	-0.00854176
-0.0204	0.00530318		0.0170816	0.021802	0.0122578		-0.0204	0.00898034		0.00542539	0.0219676	0.0155323		-0.0204	-0.00610408		-0.0115402	-0.009184	-0.00773107		-0.0204	-0.00240043		-0.00527881	-0.00903507	-0.00845654
-0.0202	0.0053539		0.0171803	0.0218732	0.0122766		-0.0202	0.00899916		0.0054371	0.0220579	0.0155953		-0.0202	-0.00605336		-0.0114414	-0.00911281	-0.00771227		-0.0202	-0.00238161		-0.0052671	-0.00894479	-0.00839352
-0.02	0.00539088		0.0172715	0.0219504	0.01231		-0.02	0.00900827		0.00545261	0.0221648	0.0156835		-0.02	-0.00601639		-0.0113503	-0.00903555	-0.00767881		-0.02	-0.0023725		-0.00525158	-0.00883787	-0.00830537
-0.0198	0.00542021		0.0173478	0.0220193	0.0123804		-0.0198	0.00902227		0.00547581	0.0222707	0.0157936		-0.0198	-0.00598705		-0.0112739	-0.00896668	-0.00760845		-0.0198	-0.00235851		-0.00522838	-0.00873197	-0.00819524
-0.0196	0.00544506		0.0174166	0.0220915	0.0124607		-0.0196	0.00905576		0.00550141	0.0223862	0.0159001		-0.0196	-0.0059622		-0.0112051	-0.00889441	-0.00752816		-0.0196	-0.00232501		-0.00520279	-0.0086165	-0.0080888
-0.0194	0.00546691		0.0174783	0.0221625	0.0125408		-0.0194	0.00910926		0.0055149	0.0224648	0.0159849		-0.0194	-0.00594035		-0.0111434	-0.0088235	-0.00744809		-0.0194	-0.00227151		-0.0051893	-0.0085379	-0.00800394
-0.0192	0.00548709		0.0175331	0.0222486	0.012604		-0.0192	0.00915508		0.00553506	0.0224878	0.0160757		-0.0192	-0.00592017		-0.0110887	-0.00873737	-0.00738481		-0.0192	-0.00222569		-0.00516914	-0.00851491	-0.00791319
-0.019	0.00550805		0.0175994	0.0223586	0.0126484		-0.019	0.00919275		0.00559708	0.0225518	0.0161646		-0.019	-0.00589921		-0.0110223	-0.00862737	-0.00734048		-0.019	-0.00218802		-0.00510712	-0.00845083	-0.00782426
-0.0188	0.00553231		0.0176988	0.0224783	0.0127007		-0.0188	0.00921479		0.0056781	0.0226671	0.0162286		-0.0188	-0.00587495		-0.010923	-0.00850765	-0.00728818		-0.0188	-0.00216598		-0.0050261	-0.00833558	-0.00776023
-0.0186	0.00555801		0.0178128	0.0226155	0.0127435		-0.0186	0.00924334		0.00575905	0.0228347	0.0162759		-0.0186	-0.00584925		-0.010809	-0.0083705	-0.00724536		-0.0186	-0.00213743		-0.00494515	-0.00816793	-0.00771299
-0.0184	0.00558452		0.0179354	0.0227479	0.0127786		-0.0184	0.00926894		0.00582527	0.0229877	0.0163463		-0.0184	-0.00582274		-0.0106864	-0.00823811	-0.00721024		-0.0184	-0.00211183		-0.00487893	-0.00801499	-0.00764252
-0.0182	0.00560942		0.0180495	0.0228468	0.0128361		-0.0182	0.00928604		0.00585886	0.0231376	0.016426		-0.0182	-0.00579784		-0.0105723	-0.00813918	-0.00715278		-0.0182	-0.00209473		-0.00484534	-0.00786503	-0.00756287
-0.018	0.0056381		0.0181427	0.0229453	0.0129255		-0.018	0.00930551		0.00591645	0.0232616	0.0165122		-0.018	-0.00576916		-0.0104791	-0.00804065	-0.00706338		-0.018	-0.00207526		-0.00478775	-0.00774102	-0.00747666
-0.0178	0.00566508		0.0182216	0.0230485	0.0130205		-0.0178	0.00931775		0.0059906	0.0233194	0.0166225		-0.0178	-0.00574218		-0.0104002	-0.00793742	-0.00696839		-0.0178	-0.00206302		-0.0047136	-0.00768329	-0.00736632
-0.0176	0.00569092		0.0182741	0.0231343	0.0130819		-0.0176	0.00932452		0.00605863	0.023378	0.0167527		-0.0176	-0.00571635		-0.0103477	-0.00785169	-0.00690694		-0.0176	-0.00205625		-0.00464557	-0.00762465	-0.0072362
-0.0174	0.00572675		0.0183376	0.0231913	0.0131318		-0.0174	0.00932744		0.00613225	0.0234746	0.0168655		-0.0174	-0.00568052		-0.0102842	-0.00779462	-0.00685701		-0.0174	-0.00205333		-0.00457195	-0.0075281	-0.00712341
-0.0172	0.00576469		0.0184222	0.0232643	0.0131949		-0.0172	0.00933612		0.00621576	0.0235675	0.0169695		-0.0172	-0.00564257		-0.0101996	-0.00772167	-0.00679399		-0.0172	-0.00204465		-0.00448843	-0.00743516	-0.00701935
-0.017	0.0057987		0.0185415	0.0233406	0.0132523		-0.017	0.00935029		0.00630075	0.0236429	0.0170585		-0.017	-0.00560856		-0.0100803	-0.00764533	-0.00673658		-0.017	-0.00203048		-0.00440345	-0.00735977	-0.00693041
-0.0168	0.00582467		0.0186798	0.0233989	0.0133041		-0.0168	0.00937025		0.00637996	0.0237202	0.017145		-0.0168	-0.00558259		-0.00994194	-0.00758704	-0.00668478		-0.0168	-0.00201052		-0.00432424	-0.00728243	-0.00684382
-0.0166	0.00586412		0.0188087	0.023451	0.0133564		-0.0166	0.00939327		0.00643722	0.0238047	0.0172092		-0.0166	-0.00554314		-0.00981306	-0.00753497	-0.00663242		-0.0166	-0.0019875		-0.00426698	-0.00719799	-0.00677964
-0.0164	0.00591478		0.0189024	0.023495	0.0134094		-0.0164	0.00941376		0.0064944	0.0238908	0.0172515		-0.0164	-0.00549248		-0.00971941	-0.00749093	-0.00657941		-0.0164	-0.00196701		-0.0042098	-0.00711182	-0.00673736
-0.0162	0.0059708		0.0189636	0.0235447	0.0134736		-0.0162	0.00942563		0.00654193	0.0240281	0.0172853		-0.0162	-0.00543646		-0.00965816	-0.00744128	-0.00651528		-0.0162	-0.00195514		-0.00416227	-0.00697453	-0.00670355
-0.016	0.0060213		0.0190033	0.0236092	0.0135536		-0.016	0.00943467		0.00658454	0.0241768	0.017337		-0.016	-0.00538597		-0.0096185	-0.00737672	-0.00643527		-0.016	-0.00194611		-0.00411965	-0.00682582	-0.00665182
-0.0158	0.0060613		0.0190505	0.0236605	0.0136229		-0.0158	0.0094422		0.00662524	0.0243317	0.0173997		-0.0158	-0.00534597		-0.0095713	-0.0073255	-0.00636591		-0.0158	-0.00193857		-0.00407895	-0.00667095	-0.00658921
-0.0156	0.00609218		0.019155	0.0237231	0.0136852		-0.0156	0.0094556		0.00668823	0.0244516	0.0174662		-0.0156	-0.00531508		-0.00946675	-0.00726291	-0.00630367		-0.0156	-0.00192517		-0.00401597	-0.00655103	-0.00652269
-0.0154	0.0061196		0.019281	0.0237945	0.0137479		-0.0154	0.00946816		0.00676331	0.0245925	0.0175432		-0.0154	-0.00528766		-0.00934074	-0.0071915	-0.00624092		-0.0154	-0.00191261		-0.00394088	-0.00641021	-0.00644562
-0.0152	0.00615594		0.0194143	0.0238783	0.0138255		-0.0152	0.0094844		0.00683436	0.0247424	0.0176198		-0.0152	-0.00525132		-0.00920752	-0.0071077	-0.0061634		-0.0152	-0.00189637		-0.00386984	-0.00626027	-0.00636903
-0.015	0.00619955		0.0195267	0.0239839	0.0139114		-0.015	0.00949586		0.00689326	0.0248979	0.0176893		-0.015	-0.00520772		-0.00909505	-0.0070021	-0.0060775		-0.015	-0.00188491		-0.00381094	-0.00610475	-0.00629954
-0.0148	0.00624868		0.0196052	0.0240875	0.0140012		-0.0148	0.00951132		0.00697669	0.025039	0.017743		-0.0148	-0.00515858		-0.00901655	-0.00689849	-0.00598761		-0.0148	-0.00186945		-0.00372751	-0.00596362	-0.00624584
-0.0146	0.00630384		0.0197029	0.0241728	0.0140908		-0.0146	0.00952795		0.00707436	0.0251444	0.0177862		-0.0146	-0.00510342		-0.0089189	-0.00681318	-0.00589802		-0.0146	-0.00185282		-0.00362984	-0.00585824	-0.00620263
-0.0144	0.00636017		0.0198245	0.0242472	0.0141577		-0.0144	0.00954619		0.00715849	0.0252142	0.0178415		-0.0144	-0.00504709		-0.00879726	-0.00673875	-0.0058312		-0.0144	-0.00183458		-0.00354571	-0.00578848	-0.00614734
-0.0142	0.00640899		0.0199555	0.0242916	0.0142156		-0.0142	0.00955748		0.00720606	0.025272	0.0179086		-0.0142	-0.00499827		-0.0086663	-0.00669439	-0.00577325		-0.0142	-0.00182329		-0.00349814	-0.00573072	-0.00608028
-0.014	0.00644713		0.0200868	0.024345	0.01425		-0.014	0.00956838		0.00724995	0.0253576	0.0179805		-0.014	-0.00496013		-0.00853501	-0.00664097	-0.00573888		-0.014	-0.00181239		-0.00345425	-0.00564503	-0.0060084
-0.0138	0.00648077		0.0201981	0.0244125	0.0142886		-0.0138	0.00958131		0.00733311	0.0254575	0.0180646		-0.0138	-0.0049265		-0.00842367	-0.00657351	-0.00570023		-0.0138	-0.00179946		-0.00337109	-0.00554513	-0.0059243
-0.0136	0.0065242		0.020296	0.0245076	0.0143289		-0.0136	0.00959367		0.00743981	0.0255666	0.0181389		-0.0136	-0.00488307		-0.00832574	-0.00647832	-0.00565996		-0.0136	-0.0017871		-0.00326439	-0.00543608	-0.00584995
-0.0134	0.00657563		0.020363	0.0246069	0.0143773		-0.0134	0.00960319		0.00754647	0.025673	0.0181679		-0.0134	-0.00483164		-0.00825878	-0.00637904	-0.00561154		-0.0134	-0.00177758		-0.00315773	-0.00532968	-0.00582097
-0.0132	0.00663386		0.0204663	0.0246942	0.0144331		-0.0132	0.00961218		0.00763335	0.025778	0.0182035		-0.0132	-0.0047734		-0.00815545	-0.00629176	-0.00555571		-0.0132	-0.00176859		-0.00307085	-0.00522464	-0.00578532
-0.013	0.00668763		0.0206002	0.02476	0.0144888		-0.013	0.0096245		0.00768438	0.0258734	0.0182381		-0.013	-0.00471963		-0.00802161	-0.006226	-0.0055001		-0.013	-0.00175627		-0.00301982	-0.00512931	-0.00575075
-0.0128	0.00674052		0.0207699	0.0248172	0.0145512		-0.0128	0.00963841		0.00773881	0.0259418	0.0183004		-0.0128	-0.00466675		-0.00785193	-0.00616879	-0.00543768		-0.0128	-0.00174236		-0.00296539	-0.00506083	-0.0056885
-0.0126	0.00678434		0.020975	0.0248784	0.0146046		-0.0126	0.00965453		0.00780711	0.0259927	0.0184103		-0.0126	-0.00462292		-0.00764677	-0.00610755	-0.00538429		-0.0126	-0.00172624		-0.00289709	-0.00500992	-0.00557853
-0.0124	0.00683594		0.0211753	0.0249381	0.0146605		-0.0124	0.00967198		0.00787733	0.0260379	0.0185416		-0.0124	-0.00457133		-0.0074465	-0.00604783	-0.00532834		-0.0124	-0.00170879		-0.00282686	-0.00496482	-0.00544725
-0.0122	0.00689715		0.0213281	0.025006	0.0147362		-0.0122	0.0096953		0.00794547	0.0260781	0.0186614		-0.0122	-0.00451011		-0.00729363	-0.00598	-0.00525266		-0.0122	-0.00168547		-0.00275873	-0.00492453	-0.00532745
-0.012	0.00695849		0.0214449	0.0250675	0.0148126		-0.012	0.00971818		0.0080096	0.0261245	0.0187198		-0.012	-0.00444877		-0.00717685	-0.00591848	-0.00517626		-0.012	-0.00166259		-0.0026946	-0.00487817	-0.00526904
-0.0118	0.00702808		0.0215617	0.0251201	0.0148707		-0.0118	0.00973176		0.00809634	0.0261758	0.0187773		-0.0118	-0.00437918		-0.00706013	-0.00586589	-0.00511812		-0.0118	-0.00164901		-0.00260786	-0.00482691	-0.00521152
-0.0116	0.00711083		0.021691	0.0251944	0.0149243		-0.0116	0.00975844		0.00817754	0.0262254	0.0188565		-0.0116	-0.00429643		-0.00693078	-0.00579155	-0.00506453		-0.0116	-0.00162233		-0.00252666	-0.00477725	-0.00513236
-0.0114	0.00717509		0.0218285	0.0252865	0.0149765		-0.0114	0.00979984		0.0082487	0.0262599	0.0189402		-0.0114	-0.00423217		-0.00679326	-0.00569943	-0.00501234		-0.0114	-0.00158093		-0.0024555	-0.00474276	-0.00504868
-0.0112	0.00722776		0.0219667	0.0253914	0.0150364		-0.0112	0.00985164		0.00831082	0.0262785	0.0190191		-0.0112	-0.00417951		-0.00665512	-0.00559455	-0.00495242		-0.0112	-0.00152913		-0.00239338	-0.00472419	-0.00496973
-0.011	0.00730889		0.0221023	0.0255105	0.0150936		-0.011	0.00990526		0.00836083	0.0263032	0.0190899		-0.011	-0.00409837		-0.00651943	-0.00547549	-0.00489524		-0.011	-0.00147551		-0.00234337	-0.00469943	-0.00489899
-0.0108	0.00740159		0.0222198	0.02558	0.0151481		-0.0108	0.00993979		0.00843227	0.0263468	0.0191551		-0.0108	-0.00400568		-0.00640196	-0.00540591	-0.00484075		-0.0108	-0.00144098		-0.00227193	-0.00465589	-0.00483376
-0.0106	0.00748353		0.0223058	0.0256514	0.0152031		-0.0106	0.00995476		0.00851246	0.026387	0.0192327		-0.0106	-0.00392373		-0.00631593	-0.00533457	-0.00478575		-0.0106	-0.00142601		-0.00219174	-0.00461567	-0.00475612
-0.0104	0.0075477		0.0223737	0.0257374	0.0152587		-0.0104	0.00996196		0.00858704	0.026451	0.0193074		-0.0104	-0.00385956		-0.00624804	-0.00524857	-0.00473012		-0.0104	-0.00141881		-0.00211716	-0.00455163	-0.00468146
-0.0102	0.00761783		0.0224714	0.0258191	0.0153083		-0.0102	0.00997806		0.00865099	0.026526	0.0193876		-0.0102	-0.00378943		-0.00615042	-0.00516691	-0.0046806		-0.0102	-0.00140271		-0.00205321	-0.00447667	-0.00460129
-0.01	0.00768789		0.0225767	0.0258998	0.015355		-0.01	0.0100013		0.00870584	0.0265809	0.0194496		-0.01	-0.00371937		-0.00604504	-0.00508619	-0.0046339		-0.01	-0.00137945		-0.00199836	-0.00442181	-0.00453927
-0.0098	0.00777243		0.0226874	0.0260103	0.0154013		-0.0098	0.01003		0.00875376	0.0266264	0.019513		-0.0098	-0.00363483		-0.00593436	-0.00497569	-0.00458753		-0.0098	-0.0013508		-0.00195044	-0.00437627	-0.0044759
-0.0096	0.00785847		0.0227953	0.0261216	0.015446		-0.0096	0.0100677		0.00879433	0.0266954	0.0195862		-0.0096	-0.00354879		-0.00582652	-0.00486439	-0.00454283		-0.0096	-0.00131308		-0.00190987	-0.00430725	-0.00440269
-0.0094	0.00794137		0.0228937	0.0262166	0.015494		-0.0094	0.0101044		0.00882397	0.0267806	0.0196397		-0.0094	-0.00346589		-0.00572811	-0.00476932	-0.00449484		-0.0094	-0.00127634		-0.00188023	-0.00422207	-0.00434915
-0.0092	0.00801455		0.0229967	0.0263317	0.0155452		-0.0092	0.0101328		0.00885905	0.0268647	0.0196947		-0.0092	-0.00339271		-0.00562509	-0.00465425	-0.00444362		-0.0092	-0.001248		-0.00184514	-0.00413797	-0.00429415
-0.009	0.00808875		0.0230876	0.0264309	0.0155988		-0.009	0.0101528		0.00890257	0.0269373	0.0197471		-0.009	-0.00331852		-0.00553421	-0.00455503	-0.00439004		-0.009	-0.00122797		-0.00180163	-0.00406541	-0.00424178
-0.0088	0.00816202		0.0231634	0.0265381	0.0156577		-0.0088	0.0101707		0.00894868	0.0269936	0.019798		-0.0088	-0.00324524		-0.0054584	-0.00444791	-0.00433112		-0.0088	-0.00121006		-0.00175552	-0.00400911	-0.00419089
-0.0086	0.00822668		0.0232292	0.0266775	0.015718		-0.0086	0.0101908		0.00897965	0.027064	0.0198572		-0.0086	-0.00318058		-0.00539257	-0.00430842	-0.00427089		-0.0086	-0.00119001		-0.00172454	-0.00393865	-0.00413167
-0.0084	0.00831632		0.0233058	0.0268319	0.0157861		-0.0084	0.0102126		0.00901327	0.0271411	0.0199315		-0.0084	-0.00309095		-0.00531602	-0.0041541	-0.00420279		-0.0084	-0.00116819		-0.00169092	-0.00386159	-0.00405739
-0.0082	0.00844233		0.0234036	0.0269608	0.0158654		-0.0082	0.0102369		0.00905616	0.027233	0.0200114		-0.0082	-0.00296493		-0.00521819	-0.00402518	-0.00412343		-0.0082	-0.00114386		-0.00164804	-0.00376964	-0.00397746
-0.008	0.00858588		0.0235493	0.0270832	0.0159414		-0.008	0.0102554		0.00909723	0.0273284	0.0200971		-0.008	-0.00282138		-0.00507245	-0.00390278	-0.00404746		-0.008	-0.00112535		-0.00160697	-0.00367426	-0.00389176
-0.0078	0.00871112		0.0236951	0.0272068	0.0160259		-0.0078	0.0102648		0.00913243	0.0274041	0.0201635		-0.0078	-0.00269615		-0.0049267	-0.00377917	-0.003963		-0.0078	-0.00111593		-0.00157177	-0.00359856	-0.00382536
-0.0076	0.00881445		0.0238414	0.0273054	0.0161258		-0.0076	0.0102731		0.0091586	0.0274846	0.0202298		-0.0076	-0.00259281		-0.00478036	-0.00368061	-0.0038631		-0.0076	-0.00110771		-0.0015456	-0.00351809	-0.00375907
-0.0074	0.00888489		0.0239427	0.0273975	0.0162299		-0.0074	0.0102803		0.00917066	0.0275663	0.0203211		-0.0074	-0.00252238		-0.00467911	-0.00358846	-0.00375898		-0.0074	-0.00110044		-0.00153354	-0.00343635	-0.00366781
-0.0072	0.00893848		0.0240117	0.0274933	0.016314		-0.0072	0.0102847		0.00918208	0.0276256	0.0204174		-0.0072	-0.00246879		-0.00461011	-0.00349265	-0.00367486		-0.0072	-0.00109602		-0.00152212	-0.00337703	-0.00357142
-0.007	0.00900973		0.0240889	0.0275967	0.0163802		-0.007	0.0102961		0.00921207	0.0276912	0.0205213		-0.007	-0.00239753		-0.00453287	-0.00338927	-0.00360863		-0.007	-0.00108464		-0.00149213	-0.00331142	-0.00346754
-0.0068	0.00910459		0.0241818	0.0276893	0.0164282		-0.0068	0.0103044		0.00925337	0.0277716	0.0206348		-0.0068	-0.00230267		-0.00444001	-0.00329664	-0.00356069		-0.0068	-0.00107638		-0.00145083	-0.00323107	-0.00335407
-0.0066	0.00920696		0.0242766	0.0277934	0.0164574		-0.0066	0.0103137		0.00929601	0.0278601	0.0207898		-0.0066	-0.0022003		-0.00434518	-0.00319261	-0.00353151		-0.0066	-0.00106712		-0.00140818	-0.00314253	-0.0031991
-0.0064	0.00929669		0.0243906	0.0279236	0.0164987		-0.0064	0.0103266		0.00933246	0.0279487	0.0209773		-0.0064	-0.00211057		-0.0042312	-0.00306235	-0.00349013		-0.0064	-0.00105415		-0.00137174	-0.00305399	-0.00301159
-0.0062	0.00937284		0.0245051	0.0280386	0.0165706		-0.0062	0.0103414		0.00935946	0.0280462	0.0211494		-0.0062	-0.00203442		-0.00411667	-0.00294736	-0.00341821		-0.0062	-0.00103942		-0.00134474	-0.00295647	-0.00283943
-0.006	0.00943409		0.024609	0.0281196	0.0166798		-0.006	0.0103588		0.00937806	0.0281308	0.0212489		-0.006	-0.00197318		-0.00401273	-0.00286641	-0.00330902		-0.006	-0.00102202		-0.00132614	-0.00287182	-0.00274001
-0.0058	0.00949297		0.0247022	0.0281895	0.0168225		-0.0058	0.0103737		0.00939194	0.0281793	0.0212904		-0.0058	-0.00191429		-0.0039196	-0.00279643	-0.00316633		-0.0058	-0.00100711		-0.00131225	-0.00282334	-0.00269845
-0.0056	0.00955391		0.0247652	0.0282943	0.0169609		-0.0056	0.0103845		0.00941315	0.0282205	0.0213553		-0.0056	-0.00185335		-0.00385656	-0.00269164	-0.003028		-0.0056	-0.000996246		-0.00129105	-0.00278216	-0.00263354
-0.0054	0.0096159		0.0248263	0.0284046	0.0170695		-0.0054	0.0104081		0.0094316	0.02825	0.0214352		-0.0054	-0.00179137		-0.00379545	-0.00258133	-0.00291939		-0.0054	-0.000972649		-0.0012726	-0.00275267	-0.00255362
-0.0052	0.00969159		0.0248985	0.0285159	0.0171491		-0.0052	0.0104429		0.00944673	0.0283131	0.0215247		-0.0052	-0.00171567		-0.0037233	-0.0024701	-0.00283977		-0.0052	-0.00093788		-0.00125747	-0.00268961	-0.0024642
-0.005	0.00976803		0.0250039	0.0286134	0.0172184		-0.005	0.0104792		0.00945845	0.0283914	0.0216336		-0.005	-0.00163923		-0.00361789	-0.00237256	-0.00277044		-0.005	-0.00090159		-0.00124575	-0.00261124	-0.0023553
-0.0048	0.00982653		0.0251122	0.0286973	0.0173006		-0.0048	0.0105194		0.00947389	0.0284789	0.0217341		-0.0048	-0.00158073		-0.00350959	-0.00228867	-0.00268826		-0.0048	-0.000861407		-0.00123031	-0.00252381	-0.00225479
-0.0046	0.00986336		0.0252039	0.0287879	0.0173906		-0.0046	0.0105496		0.00948863	0.028566	0.0218188		-0.0046	-0.0015439		-0.0034179	-0.00219804	-0.00259829		-0.0046	-0.00083115		-0.00121557	-0.0024367	-0.00217009
-0.0044	0.00989513		0.0253085	0.0288838	0.0174872		-0.0044	0.0105709		0.00950646	0.0286432	0.021883		-0.0044	-0.00151213		-0.0033133	-0.00210213	-0.00250166		-0.0044	-0.00080992		-0.00119774	-0.00235949	-0.0021059
-0.0042	0.00995885		0.0254174	0.0289811	0.0175886		-0.0042	0.0105893		0.00953121	0.0287407	0.0219423		-0.0042	-0.00144841		-0.00320442	-0.00200482	-0.00240031		-0.0042	-0.000791501		-0.00117299	-0.00226195	-0.00204654
-0.004	0.0100416		0.0255173	0.0290757	0.017688		-0.004	0.0106073		0.0095579	0.0287984	0.0219934		-0.004	-0.00136566		-0.00310445	-0.0019103	-0.00230085		-0.004	-0.000773519		-0.0011463	-0.00220429	-0.0019955
-0.0038	0.0101201		0.0256137	0.0291654	0.0177947		-0.0038	0.0106338		0.00958302	0.0288541	0.0220541		-0.0038	-0.0012872		-0.00300806	-0.00182054	-0.00219412		-0.0038	-0.000746961		-0.00112118	-0.00214853	-0.00193478
-0.0036	0.0101992		0.0257218	0.0292375	0.0178895		-0.0036	0.0106619		0.00961172	0.0289281	0.0221384		-0.0036	-0.0012081		-0.00289997	-0.00174849	-0.0020994		-0.0036	-0.000718859		-0.00109248	-0.00207452	-0.00185047
-0.0034	0.0102609		0.0258286	0.0293325	0.0179505		-0.0034	0.0106797		0.00965206	0.0289978	0.0222246		-0.0034	-0.00114635		-0.00279322	-0.00165349	-0.00203831		-0.0034	-0.000701029		-0.00105214	-0.0020049	-0.00176431
-0.0032	0.0103114		0.025934	0.0294219	0.0180128		-0.0032	0.0107067		0.00969212	0.0290707	0.0222924		-0.0032	-0.00109586		-0.00268777	-0.00156406	-0.00197609		-0.0032	-0.00067408		-0.00101208	-0.00193196	-0.00169643
-0.003	0.0103557		0.0260444	0.0294809	0.0181001		-0.003	0.0107385		0.00972557	0.0291379	0.0223402		-0.003	-0.0010516		-0.00257736	-0.00150505	-0.00188877		-0.003	-0.000642313		-0.000978628	-0.00186478	-0.00164864
-0.0028	0.0103987		0.0261644	0.0295315	0.0182097		-0.0028	0.010779		0.00977775	0.029214	0.0224281		-0.0028	-0.00100852		-0.00245741	-0.00145442	-0.00177913		-0.0028	-0.000601798		-0.000926448	-0.0017887	-0.00156081
-0.0026	0.0104375		0.0263055	0.0296097	0.0183066		-0.0026	0.0108153		0.00983606	0.0293335	0.0225333		-0.0026	-0.000969774		-0.00231629	-0.00137628	-0.00168222		-0.0026	-0.000565504		-0.000868133	-0.00166917	-0.00145554
-0.0024	0.0104824		0.026427	0.0296854	0.0183955		-0.0024	0.010847		0.00989175	0.029464	0.0226657		-0.0024	-0.00092487		-0.00219475	-0.00130059	-0.00159333		-0.0024	-0.000533741		-0.000812448	-0.00153862	-0.00132312
-0.0022	0.0105366		0.0265564	0.0298014	0.0184961		-0.0022	0.0108801		0.0099343	0.0296003	0.0227986		-0.0022	-0.000870707		-0.00206543	-0.00118455	-0.00149271		-0.0022	-0.000500658		-0.0007699	-0.00140235	-0.00119025
-0.002	0.0105972		0.0267116	0.0299339	0.0186197		-0.002	0.0109273		0.0099848	0.0297533	0.0229113		-0.002	-0.000810042		-0.00191021	-0.00105203	-0.00136911		-0.002	-0.000453472		-0.000719396	-0.00124935	-0.00107758
-0.0018	0.010683		0.0268936	0.0300578	0.0187543		-0.0018	0.0109671		0.0100405	0.0298745	0.0229983		-0.0018	-0.000724252		-0.00172815	-0.000928183	-0.0012346		-0.0018	-0.000413653		-0.000663693	-0.00112818	-0.000990582
-0.0016	0.0107746		0.0270839	0.0301852	0.0189057		-0.0016	0.011003		0.010109	0.0299698	0.0230906		-0.0016	-0.00063269		-0.00153789	-0.000800763	-0.00108319		-0.0016	-0.000377813		-0.000595183	-0.00103291	-0.00089824
-0.0014	0.0108619		0.027262	0.030311	0.0190558		-0.0014	0.0110319		0.0101764	0.0300628	0.0231514		-0.0014	-0.000545365		-0.00135977	-0.000675009	-0.000933024		-0.0014	-0.000348828		-0.000527812	-0.000939889	-0.000837416
-0.0012	0.0109323		0.0274214	0.030406	0.0191853		-0.0012	0.0110636		0.0102647	0.0301706	0.023208		-0.0012	-0.00047497		-0.00120042	-0.000579928	-0.000803592		-0.0012	-0.000317161		-0.000439518	-0.000832047	-0.000780838
-0.001	0.0109929		0.027595	0.0304726	0.0192818		-0.001	0.0111119		0.010343	0.030298	0.0232654		-0.001	-0.000414323		-0.00102679	-0.000513365	-0.000707038		-0.001	-0.000268843		-0.0003612	-0.000704672	-0.000723468
-0.0008	0.0110549		0.02777	0.0305151	0.019405		-0.0008	0.0111522		0.0104014	0.0304209	0.0233437		-0.0008	-0.00035241		-0.000851739	-0.000470906	-0.000583858		-0.0008	-0.000228608		-0.000302764	-0.000581772	-0.000645136
-0.0006	0.0111334		0.0279329	0.0305611	0.0195442		-0.0006	0.0111911		0.010441	0.0305785	0.0234624		-0.0006	-0.000273855		-0.00068884	-0.000424849	-0.000444637		-0.0006	-0.000189665		-0.000263236	-0.000424147	-0.000526428
-0.0004	0.0112274		0.0281161	0.0306641	0.0197026		-0.0004	0.0112342		0.0105085	0.0307326	0.0236263		-0.0004	-0.000179911		-0.000505727	-0.000321845	-0.000286226		-0.0004	-0.000146538		-0.000195688	-0.000270023	-0.000362518
-0.0002	0.0113214		0.0283429	0.0307977	0.0198517		-0.0002	0.0112963		0.0106008	0.0308628	0.0238125		-0.0002	-8.5907e-05		-0.000278839	-0.000188304	-0.000137111		-0.0002	-8.4425e-05		-0.000103363	-0.000139819	-0.00017636
0	0.0114073		0.0286218	0.030986	0.0199889		0	0.0113808		0.0107042	0.0310027	0.0239889		0	0		0	0	0		0	0		0	0	0
0.0002	0.0114831		0.0288894	0.0312064	0.0201538		0.0002	0.0114672		0.010791	0.0311743	0.0241396		0.0002	7.5844e-05		0.000267633	0.000220428	0.000164991		0.0002	8.6399e-05		8.6797e-05	0.00017159	0.000150754
0.0004	0.011549		0.029085	0.0314032	0.0202973		0.0004	0.0115331		0.0108503	0.0313148	0.0242618		0.0004	0.000141728		0.000463192	0.000417258	0.000308482		0.0004	0.000152329		0.000146077	0.000312106	0.000272965
0.0006	0.0116053		0.0292023	0.0315682	0.0204429		0.0006	0.0115777		0.0109185	0.0314232	0.0243443		0.0006	0.000198063		0.000580539	0.000582287	0.000454047		0.0006	0.000196959		0.000214297	0.000420497	0.000355394
0.0008	0.011658		0.0293337	0.0317089	0.0205747		0.0008	0.0116007		0.0110193	0.0315637	0.0244171		0.0008	0.000250743		0.00071192	0.000722902	0.00058581		0.0008	0.000219922		0.000315097	0.000561079	0.00042824
0.001	0.0117116		0.0294599	0.031812	0.0206925		0.001	0.011636		0.011126	0.0317714	0.0245165		0.001	0.000304298		0.000838081	0.00082607	0.000703647		0.001	0.000255187		0.000421851	0.000768694	0.000527625
0.0012	0.0117682		0.0295625	0.0319151	0.0208274		0.0012	0.0116816		0.0112296	0.0319747	0.0246582		0.0012	0.0003609		0.000940733	0.000929185	0.000838586		0.0012	0.000300859		0.000525359	0.000971995	0.000669299
0.0014	0.0118143		0.0296719	0.0320181	0.0209324		0.0014	0.0117284		0.0113113	0.0321024	0.0248031		0.0014	0.000407021		0.00105015	0.0010321	0.000943591		0.0014	0.00034765		0.000607128	0.0010997	0.000814235
0.0016	0.011856		0.0297792	0.032144	0.0210255		0.0016	0.0117712		0.0113564	0.0321988	0.0249462		0.0016	0.000448694		0.00115738	0.00115803	0.00103659		0.0016	0.000390431		0.000652166	0.00119617	0.000957372
0.0018	0.011906		0.0298799	0.0322904	0.021121		0.0018	0.0118111		0.0114001	0.0322963	0.0250684		0.0018	0.000498696		0.00125808	0.00130446	0.00113217		0.0018	0.000430354		0.000695923	0.00129361	0.00107953
0.002	0.0119634		0.0299934	0.0324036	0.02126		0.002	0.0118452		0.0114479	0.0323959	0.0251666		0.002	0.000556187		0.00137163	0.00141764	0.00127117		0.002	0.000464462		0.00074367	0.00139319	0.00117772
0.0022	0.0120289		0.0300897	0.0325092	0.0214356		0.0022	0.0118726		0.0115081	0.0324936	0.0252384		0.0022	0.000621595		0.00146793	0.00152325	0.00144674		0.0022	0.000491875		0.000803855	0.00149094	0.0012495
0.0024	0.0120975		0.0301918	0.0326322	0.0216239		0.0024	0.0118937		0.0115741	0.0325773	0.0253438		0.0024	0.000690249		0.00157002	0.00164619	0.00163503		0.0024	0.000512954		0.000869854	0.00157467	0.00135492
0.0026	0.0121514		0.0303239	0.0327706	0.0218041		0.0026	0.0119035		0.0116377	0.032674	0.0254795		0.0026	0.000744168		0.00170208	0.00178461	0.00181521		0.0026	0.000522707		0.000933519	0.00167134	0.00149062
0.0028	0.0121942		0.0304836	0.032909	0.0219686		0.0028	0.0119146		0.0116898	0.0327931	0.0256345		0.0028	0.00078698		0.00186185	0.00192303	0.00197976		0.0028	0.000533842		0.000985641	0.00179047	0.00164566
0.003	0.0122428		0.0306367	0.0330206	0.0221272		0.003	0.0119403		0.0117229	0.0329113	0.0257713		0.003	0.000835517		0.0020149	0.0020346	0.00213836		0.003	0.000559495		0.00101868	0.00190863	0.00178239
0.0032	0.0122864		0.0307817	0.0331207	0.0222953		0.0032	0.0119726		0.0117407	0.033033	0.0258985		0.0032	0.000879187		0.00215992	0.00213477	0.00230647		0.0032	0.000591785		0.00103653	0.00203036	0.00190963
0.0034	0.0123362		0.0309253	0.0332183	0.0224578		0.0034	0.011999		0.0117589	0.0331278	0.0260326		0.0034	0.000928948		0.00230351	0.00223234	0.00246897		0.0034	0.00061819		0.00105472	0.00212514	0.00204376
0.0036	0.0123874		0.0310311	0.033322	0.0226138		0.0036	0.0120212		0.0117854	0.0331959	0.0261512		0.0036	0.000980117		0.00240932	0.00233604	0.00262494		0.0036	0.000640391		0.00108124	0.00219322	0.00216233
0.0038	0.012429		0.0311166	0.0334205	0.0227663		0.0038	0.0120398		0.0118126	0.0333096	0.0262541		0.0038	0.00102174		0.00249483	0.00243456	0.00277743		0.0038	0.000659045		0.00110841	0.00230697	0.00226522
0.004	0.0124657		0.0312103	0.033492	0.0228881		0.004	0.0120617		0.0118397	0.0334399	0.0263532		0.004	0.00105846		0.0025885	0.00250608	0.00289923		0.004	0.00068092		0.00113553	0.00243723	0.00236438
0.0042	0.0125041		0.0313278	0.0335793	0.0230016		0.0042	0.0120742		0.011863	0.0335375	0.0264356		0.0042	0.00109689		0.00270602	0.00259333	0.00301273		0.0042	0.000693468		0.00115884	0.00253483	0.00244672
0.0044	0.012553		0.0315089	0.033692	0.0231143		0.0044	0.0120914		0.0118832	0.0336131	0.0265097		0.0044	0.00114575		0.0028871	0.00270607	0.00312542		0.0044	0.000710616		0.00117897	0.00261039	0.00252088
0.0046	0.0126013		0.0316826	0.0338273	0.0232219		0.0046	0.0121147		0.0118977	0.0337198	0.0265761		0.0046	0.00119409		0.00306079	0.00284132	0.00323306		0.0046	0.000733963		0.00119347	0.00271712	0.00258721
0.0048	0.0126473		0.0318871	0.0339619	0.0232952		0.0048	0.0121458		0.0119101	0.0338688	0.0266436		0.0048	0.00123999		0.00326529	0.0029759	0.00330637		0.0048	0.000765061		0.0012059	0.00286608	0.00265478
0.005	0.0127007		0.0321178	0.0340607	0.023323		0.005	0.012189		0.0119176	0.0340522	0.0266992		0.005	0.00129346		0.00349605	0.00307473	0.0033341		0.005	0.000808268		0.00121337	0.00304955	0.00271033
0.0052	0.0127619		0.0323269	0.0341423	0.0233748		0.0052	0.0122251		0.011921	0.0342677	0.0267478		0.0052	0.00135461		0.00370516	0.00315631	0.00338598		0.0052	0.000844326		0.00121683	0.00326506	0.0027589
0.0054	0.0128415		0.0325055	0.0342239	0.0234494		0.0054	0.0122588		0.0119237	0.0344279	0.0268116		0.0054	0.00143421		0.00388371	0.00323797	0.00346052		0.0054	0.000878028		0.00121954	0.00342519	0.00282272
0.0056	0.0129255		0.0326682	0.0343111	0.0235498		0.0056	0.0122966		0.0119263	0.0345427	0.0269028		0.0056	0.00151823		0.00404638	0.00332513	0.00356094		0.0056	0.000915794		0.00122205	0.00354005	0.00291393
0.0058	0.0130044		0.0328001	0.0344276	0.0236908		0.0058	0.01234		0.0119282	0.034664	0.0270173		0.0058	0.00159714		0.00417828	0.0034416	0.00370198		0.0058	0.000959211		0.00122397	0.00366132	0.00302847
0.006	0.0130642		0.0328948	0.0345457	0.0238567		0.006	0.0123787		0.0119321	0.0347808	0.0271706		0.006	0.00165691		0.00427304	0.0035597	0.00386782		0.006	0.000997943		0.00122785	0.00377812	0.00318177
0.0062	0.0131034		0.0329441	0.034672	0.0240167		0.0062	0.0124069		0.0119373	0.0348902	0.0273531		0.0062	0.0016961		0.00432228	0.00368604	0.00402785		0.0062	0.00102615		0.00123309	0.00388752	0.00336421
0.0064	0.0131316		0.0330124	0.0348046	0.0241466		0.0064	0.0124308		0.0119454	0.0349656	0.0275104		0.0064	0.00172435		0.00439061	0.00381863	0.00415774		0.0064	0.00105002		0.00124119	0.00396292	0.00352157
0.0066	0.0131671		0.0330963	0.0349088	0.0242274		0.0066	0.0124554		0.0119552	0.0350309	0.0276006		0.0066	0.00175983		0.00447455	0.00392286	0.00423857		0.0066	0.00107462		0.00125102	0.00402822	0.00361172
0.0068	0.0132096		0.0331945	0.0350032	0.0243255		0.0068	0.0124785		0.0119607	0.0351368	0.0276417		0.0068	0.00180235		0.00457274	0.0040172	0.00433663		0.0068	0.00109774		0.00125653	0.00413414	0.0036528
0.007	0.0132638		0.0332995	0.0350851	0.0244327		0.007	0.0125096		0.0119668	0.0352352	0.0277086		0.007	0.0018565		0.00467773	0.00409913	0.00444381		0.007	0.00112878		0.00126262	0.00423254	0.00371975
0.0072	0.0133265		0.033405	0.0351437	0.0245243		0.0072	0.0125578		0.0119784	0.0353363	0.0278067		0.0072	0.00191923		0.00478321	0.00415773	0.00453542		0.0072	0.00117703		0.00127416	0.00433366	0.00381784
0.0074	0.0133905		0.0335047	0.0351888	0.0245666		0.0074	0.0126114		0.0119943	0.0354404	0.0279214		0.0074	0.00198325		0.00488288	0.00420283	0.0045777		0.0074	0.00123059		0.00129012	0.00443776	0.00393251
0.0076	0.0134478		0.0336024	0.0352562	0.0245998		0.0076	0.0126641		0.0120087	0.0355687	0.028047		0.0076	0.0020405		0.00498061	0.00427028	0.00461097		0.0076	0.00128333		0.00130454	0.00456607	0.0040581
0.0078	0.0135112		0.0337092	0.0353319	0.0246686		0.0078	0.0127082		0.0120241	0.0356701	0.0281903		0.0078	0.00210389		0.00508747	0.0043459	0.00467977		0.0078	0.00132742		0.00131994	0.00466743	0.00420139
0.008	0.0135723		0.0338403	0.0353934	0.0247628		0.008	0.0127425		0.0120323	0.0357811	0.0283577		0.008	0.00216504		0.00521848	0.0044074	0.00477398		0.008	0.00136175		0.00132809	0.00477847	0.00436879
0.0082	0.0136332		0.033992	0.0354566	0.0248491		0.0082	0.0127768		0.0120399	0.0358965	0.0285003		0.0082	0.00222597		0.00537017	0.00447062	0.00486022		0.0082	0.00139603		0.00133567	0.00489384	0.00451145
0.0084	0.0137015		0.0341319	0.0355224	0.0249118		0.0084	0.0128491		0.0120568	0.0360005	0.0286152		0.0084	0.00229422		0.00551012	0.00453641	0.00492293		0.0084	0.00146836		0.00135264	0.00499785	0.00462633
0.0086	0.0137506		0.0342397	0.0355992	0.0250225		0.0086	0.0129518		0.0120764	0.0361149	0.0286934		0.0086	0.00234333		0.00561789	0.00461321	0.0050336		0.0086	0.00157098		0.00137223	0.00511222	0.00470454
0.0088	0.0138092		0.034347	0.0356619	0.0251385		0.0088	0.0130453		0.0120898	0.0362118	0.0287413		0.0088	0.00240195		0.00572527	0.00467591	0.00514969		0.0088	0.00166453		0.00138559	0.00520911	0.00475242
0.009	0.0138817		0.0344519	0.0357235	0.0252471		0.009	0.0131083		0.0121074	0.0362803	0.0288263		0.009	0.00247442		0.00583012	0.00473755	0.00525824		0.009	0.00172753		0.00140318	0.00527759	0.00483744
0.0092	0.0139547		0.0345432	0.0357947	0.0253337		0.0092	0.0131491		0.0121269	0.0363494	0.0289199		0.0092	0.00254744		0.00592138	0.0048087	0.00534483		0.0092	0.00176828		0.00142274	0.00534677	0.00493108
0.0094	0.0140247		0.0346297	0.035893	0.025415		0.0094	0.0131765		0.012146	0.0364221	0.0289903		0.0094	0.0026174		0.00600792	0.00490704	0.0054261		0.0094	0.00179572		0.00144179	0.00541945	0.00500148
0.0096	0.0140869		0.0347082	0.0360213	0.0254721		0.0096	0.0132247		0.0121669	0.0364909	0.0290296		0.0096	0.00267968		0.00608641	0.00503533	0.0054832		0.0096	0.00184392		0.00146273	0.00548824	0.00504069
0.0098	0.0141374		0.0347652	0.0361581	0.0254984		0.0098	0.0132797		0.0121903	0.0365603	0.0290883		0.0098	0.00273018		0.00614339	0.00517216	0.00550953		0.0098	0.00189897		0.00148607	0.00555768	0.00509944
0.01	0.0141953		0.0348198	0.0363029	0.025531		0.01	0.0133303		0.0122224	0.0366437	0.0291628		0.01	0.00278803		0.00619798	0.00531692	0.00554215		0.01	0.00194957		0.00151825	0.00564103	0.0051739
0.0102	0.0142453		0.0348934	0.0364319	0.0255756		0.0102	0.0133758		0.0122559	0.0367233	0.0292735		0.0102	0.00283804		0.00627162	0.00544592	0.00558679		0.0102	0.00199498		0.00155173	0.00572061	0.00528462
0.0104	0.0142895		0.0349861	0.0365257	0.0256186		0.0104	0.0134147		0.0122965	0.036838	0.0293841		0.0104	0.00288219		0.00636437	0.00553975	0.00562971		0.0104	0.00203394		0.00159231	0.00583535	0.00539525
0.0106	0.0143292		0.0350364	0.0366216	0.0256968		0.0106	0.0134539		0.0123393	0.0369717	0.0294996		0.0106	0.0029219		0.00641463	0.00563563	0.00570795		0.0106	0.00207314		0.00163505	0.00596905	0.00551071
0.0108	0.0143731		0.0350998	0.0367255	0.0257808		0.0108	0.013485		0.0123766	0.0371145	0.0296108		0.0108	0.00296589		0.00647798	0.00573953	0.00579195		0.0108	0.00210424		0.00167241	0.00611186	0.00562194
0.011	0.0144118		0.0351715	0.036845	0.0258708		0.011	0.0135147		0.0124004	0.0372294	0.0297082		0.011	0.00300453		0.00654973	0.005859	0.00588193		0.011	0.00213397		0.00169623	0.00622677	0.00571938
0.0112	0.0144601		0.035252	0.0369748	0.0259671		0.0112	0.0135363		0.0124316	0.0372809	0.0297865		0.0112	0.00305279		0.00663022	0.00598885	0.00597823		0.0112	0.00215554		0.0017274	0.00627823	0.00579759
0.0114	0.0145076		0.0353552	0.0371036	0.0260519		0.0114	0.0135494		0.0124617	0.0373011	0.0298824		0.0114	0.0031003		0.00673339	0.00611766	0.00606301		0.0114	0.00216863		0.0017575	0.00629847	0.00589357
0.0116	0.0145634		0.0354585	0.0372179	0.0261269		0.0116	0.013572		0.012492	0.0373348	0.0299707		0.0116	0.00315617		0.00683668	0.00623191	0.00613806		0.0116	0.00219126		0.00178781	0.00633218	0.00598185
0.0118	0.0146232		0.0355287	0.0373066	0.0261855		0.0118	0.0135976		0.0125246	0.0373943	0.0301015		0.0118	0.00321589		0.00690695	0.00632068	0.00619668		0.0118	0.00221679		0.00182039	0.00639162	0.00611268
0.012	0.0146884		0.0355684	0.0374122	0.0262132		0.012	0.0136219		0.0125618	0.0375138	0.0302918		0.012	0.00328116		0.00694662	0.0064262	0.00622431		0.012	0.00224117		0.00185757	0.00651118	0.00630292
0.0122	0.0147488		0.0356004	0.0375449	0.0262446		0.0122	0.0136413		0.0125953	0.0376199	0.0304908		0.0122	0.00334157		0.00697865	0.00655891	0.00625576		0.0122	0.00226049		0.00189111	0.00661723	0.00650193
0.0124	0.0148108		0.0356433	0.0377129	0.0262845		0.0124	0.0136542		0.0126142	0.0377475	0.0306677		0.0124	0.00340357		0.00702153	0.00672692	0.00629561		0.0124	0.0022734		0.00190996	0.0067448	0.00667887
0.0126	0.0148727		0.0356996	0.0378837	0.0263327		0.0126	0.01366		0.0126222	0.0378531	0.0307989		0.0126	0.0034654		0.00707779	0.0068977	0.00634382		0.0126	0.00227923		0.00191801	0.00685045	0.00680999
0.0128	0.0149374		0.0357809	0.0380536	0.0263753		0.0128	0.0136631		0.0126355	0.0379615	0.0308871		0.0128	0.00353018		0.00715916	0.00706767	0.00638645		0.0128	0.00228235		0.00193132	0.00695888	0.00689821
0.013	0.0150047		0.035883	0.0382063	0.02643		0.013	0.0136722		0.012654	0.038065	0.0309495		0.013	0.00359745		0.0072612	0.00722031	0.00644116		0.013	0.00229139		0.00194985	0.00706232	0.00696062
0.0132	0.0150727		0.0359811	0.0383263	0.0264868		0.0132	0.0136838		0.0126736	0.0381521	0.0310095		0.0132	0.0036654		0.00735929	0.0073403	0.00649797		0.0132	0.00230306		0.00196935	0.00714944	0.00702065
0.0134	0.0151487		0.0360647	0.0384244	0.0265556		0.0134	0.0136948		0.0126958	0.0382271	0.0310631		0.0134	0.00374148		0.00744294	0.00743841	0.00656674		0.0134	0.00231402		0.00199162	0.00722441	0.00707422
0.0136	0.0152312		0.0361233	0.0385194	0.0266123		0.0136	0.0137026		0.0127117	0.0382845	0.0311184		0.0136	0.00382398		0.00750152	0.00753345	0.00662341		0.0136	0.00232186		0.00200749	0.00728187	0.00712955
0.0138	0.0153207		0.0361821	0.0386392	0.0266656		0.0138	0.0137141		0.012742	0.0383647	0.0311776		0.0138	0.00391342		0.00756034	0.00765328	0.00667669		0.0138	0.00233331		0.00203777	0.007362	0.00718874
0.014	0.0153843		0.0362588	0.0387877	0.0267107		0.014	0.0137313		0.0127792	0.0384785	0.0312379		0.014	0.00397708		0.00763697	0.00780176	0.00672181		0.014	0.00235056		0.00207495	0.00747587	0.00724902
0.0142	0.0154319		0.036343	0.0389095	0.026751		0.0142	0.0137564		0.0128051	0.0385913	0.0313063		0.0142	0.00402464		0.0077212	0.00792356	0.00676215		0.0142	0.00237567		0.00210092	0.00758864	0.00731745
0.0144	0.015501		0.0363994	0.0389784	0.0267945		0.0144	0.0137805		0.0128508	0.0386951	0.031374		0.0144	0.00409378		0.00777767	0.00799242	0.00680568		0.0144	0.00239973		0.00214658	0.00769239	0.00738513
0.0146	0.0155936		0.0364448	0.0390866	0.0268458		0.0146	0.013817		0.012931	0.0388126	0.0314638		0.0146	0.00418631		0.00782307	0.00810061	0.00685694		0.0146	0.00243625		0.00222681	0.00780992	0.0074749
0.0148	0.0156953		0.0364933	0.0392423	0.0269003		0.0148	0.0138454		0.0130183	0.0389543	0.0315643		0.0148	0.004288		0.00787148	0.00825635	0.00691147		0.0148	0.00246459		0.00231414	0.00795162	0.0075754
0.015	0.0158017		0.0365381	0.0394152	0.0269688		0.015	0.0138902		0.0130966	0.0390677	0.0316367		0.015	0.00439445		0.00791635	0.00842926	0.00697996		0.015	0.00250943		0.00239244	0.00806502	0.00764781
0.0152	0.0159056		0.0365768	0.0395792	0.027049		0.0152	0.0139567		0.0131607	0.0391408	0.0316828		0.0152	0.00449837		0.00795506	0.00859321	0.00706016		0.0152	0.00257596		0.00245654	0.00813812	0.00769389
0.0154	0.0159921		0.0366186	0.0397397	0.0271191		0.0154	0.0140322		0.013235	0.0391891	0.0317267		0.0154	0.00458483		0.00799685	0.00875379	0.00713021		0.0154	0.00265142		0.0025308	0.00818648	0.00773784
0.0156	0.0160423		0.0366616	0.0398831	0.0271764		0.0156	0.0140987		0.0133361	0.0392248	0.0317724		0.0156	0.00463499		0.00803979	0.00889714	0.00718758		0.0156	0.00271795		0.00263186	0.00822213	0.0077835
0.0158	0.0161126		0.0366909	0.0399911	0.0272313		0.0158	0.0141337		0.0134438	0.0392679	0.0318489		0.0158	0.00470534		0.00806915	0.00900513	0.00724242		0.0158	0.00275289		0.00273955	0.00826523	0.00786003
0.016	0.0162097		0.0367031	0.040062	0.0272767		0.016	0.0141632		0.0135661	0.0393382	0.0319458		0.016	0.00480247		0.00808128	0.00907608	0.00728789		0.016	0.00278246		0.00286192	0.00833557	0.00795693
0.0162	0.0163243		0.0367308	0.0401223	0.0273447		0.0162	0.0142082		0.0136808	0.0394166	0.0320293		0.0162	0.00491706		0.00810907	0.00913638	0.00735581		0.0162	0.00282742		0.00297655	0.00841394	0.00804047
0.0164	0.0164215		0.0367761	0.0401977	0.0274011		0.0164	0.0142675		0.0137661	0.0395034	0.0321217		0.0164	0.00501428		0.00815433	0.00921178	0.00741222		0.0164	0.00288674		0.00306185	0.00850074	0.00813282
0.0166	0.0164996		0.0368244	0.0402928	0.0274387		0.0166	0.0143289		0.0138108	0.0395909	0.0322218		0.0166	0.00509234		0.0082026	0.0093068	0.00744988		0.0166	0.00294812		0.00310659	0.00858826	0.00823297
0.0168	0.016592		0.0368762	0.0403972	0.0274526		0.0168	0.0143868		0.0138409	0.0396641	0.0323178		0.0168	0.00518472		0.00825438	0.00941121	0.00746378		0.0168	0.00300602		0.00313668	0.00866148	0.00832889
0.017	0.0166823		0.0369394	0.0405089	0.0274506		0.017	0.0144343		0.0138797	0.0397282	0.0324208		0.017	0.00527501		0.00831764	0.00952295	0.00746178		0.017	0.00305354		0.00317548	0.00872552	0.00843193
0.0172	0.0167638		0.0370245	0.040599	0.0274978		0.0172	0.0144828		0.0139378	0.039806	0.0325269		0.0172	0.00535653		0.00840273	0.00961303	0.00750896		0.0172	0.00310204		0.00323359	0.0088033	0.00853802
0.0174	0.0168368		0.0371079	0.040675	0.0275949		0.0174	0.0145353		0.014006	0.0399206	0.0326459		0.0174	0.00542958		0.00848617	0.00968901	0.00760609		0.0174	0.00315449		0.00330182	0.00891796	0.00865703
0.0176	0.016895		0.0372063	0.0407336	0.0277098		0.0176	0.0145701		0.0140734	0.0400398	0.0328128		0.0176	0.00548772		0.00858449	0.00974768	0.0077209		0.0176	0.00318938		0.00336924	0.00903709	0.00882392
0.0178	0.0169498		0.0373336	0.0408149	0.0278158		0.0178	0.0146181		0.0141408	0.0401505	0.033		0.0178	0.0055425		0.00871182	0.00982898	0.00782694		0.0178	0.00323734		0.00343659	0.00914786	0.00901111
0.018	0.017024		0.0374461	0.040906	0.027895		0.018	0.0146763		0.0142139	0.0402242	0.0331953		0.018	0.00561678		0.00882429	0.00992002	0.0079061		0.018	0.00329554		0.00350971	0.00922153	0.0092064
0.0182	0.0171064		0.0375708	0.0409857	0.0279442		0.0182	0.0147297		0.0142896	0.0402796	0.0333724		0.0182	0.00569916		0.00894902	0.00999975	0.00795537		0.0182	0.00334891		0.00358544	0.00927689	0.00938353
0.0184	0.0171908		0.0376625	0.0410592	0.027979		0.0184	0.0147703		0.0143785	0.0403576	0.0335237		0.0184	0.00578356		0.00904069	0.0100732	0.00799014		0.0184	0.00338953		0.00367432	0.00935488	0.00953479
0.0186	0.0172644		0.0377459	0.0411457	0.0280428		0.0186	0.0147951		0.014466	0.0404622	0.0336789		0.0186	0.00585717		0.00912408	0.0101598	0.00805391		0.0186	0.0034143		0.00376176	0.00945949	0.00969004
0.0188	0.0173297		0.0378426	0.0412422	0.0280978		0.0188	0.0148197		0.0145433	0.0405897	0.0338264		0.0188	0.00592248		0.00922082	0.0102563	0.00810896		0.0188	0.00343894		0.0038391	0.00958702	0.00983754
0.019	0.0174004		0.0379438	0.0413678	0.0281515		0.019	0.0148712		0.0146223	0.0406948	0.0339212		0.019	0.00599316		0.00932198	0.0103818	0.00816268		0.019	0.0034904		0.0039181	0.00969215	0.00993235
0.0192	0.017464		0.0380997	0.0415057	0.0282172		0.0192	0.0149266		0.0146903	0.0407496	0.0340123		0.0192	0.0060567		0.00947793	0.0105197	0.00822833		0.0192	0.00354582		0.00398606	0.00974695	0.0100234
0.0194	0.017516		0.0382905	0.0416227	0.0282645		0.0194	0.0149725		0.014737	0.0408283	0.034141		0.0194	0.00610871		0.00966873	0.0106368	0.00827564		0.0194	0.00359169		0.00403284	0.00982565	0.0101521
0.0196	0.0175571		0.0384705	0.041713	0.0283265		0.0196	0.0150193		0.014788	0.0409372	0.0342857		0.0196	0.00614983		0.00984869	0.010727	0.00833759		0.0196	0.00363852		0.00408379	0.00993451	0.0102968
0.0198	0.0175975		0.0386086	0.0418303	0.0283954		0.0198	0.0150658		0.014841	0.0410447	0.0344153		0.0198	0.00619019		0.00998683	0.0108444	0.00840656		0.0198	0.00368502		0.00413676	0.0100421	0.0104264
0.02	0.0176358		0.0386955	0.0419366	0.028467		0.02	0.0151291		0.014908	0.0411529	0.0345438		0.02	0.00622857		0.0100738	0.0109506	0.00847817		0.02	0.00374832		0.00420383	0.0101502	0.0105549
0.0202	0.0176743		0.0387838	0.042028	0.0285382		0.0202	0.0151803		0.0149758	0.0413296	0.0346712		0.0202	0.00626701		0.010162	0.011042	0.00854931		0.0202	0.00379952		0.00427164	0.0103269	0.0106824
0.0204	0.017715		0.0389132	0.0421393	0.0286005		0.0204	0.0152226		0.0150374	0.0414977	0.0347956		0.0204	0.0063077		0.0102914	0.0111533	0.00861167		0.0204	0.00384178		0.00433319	0.010495	0.0108067
0.0206	0.0177544		0.0390503	0.0422805	0.0286511		0.0206	0.0152475		0.0150948	0.0417234	0.0349213		0.0206	0.00634715		0.0104285	0.0112945	0.00866228		0.0206	0.00386675		0.00439055	0.0107207	0.0109324
0.0208	0.0177973		0.0391809	0.0424279	0.0287091		0.0208	0.0152686		0.0151489	0.0419252	0.0350332		0.0208	0.00639005		0.0105591	0.011442	0.00872023		0.0208	0.00388779		0.00444474	0.0109225	0.0110444
0.021	0.0178554		0.039292	0.0425746	0.0287796		0.021	0.015284		0.0151927	0.0420903	0.0350945		0.021	0.00644813		0.0106702	0.0115887	0.00879069		0.021	0.00390318		0.00448853	0.0110877	0.0111056
0.0212	0.017925		0.0394	0.0426861	0.0288673		0.0212	0.0153188		0.0152319	0.0422132	0.0351556		0.0212	0.00651773		0.0107783	0.0117001	0.00887843		0.0212	0.00393808		0.00452769	0.0112106	0.0111667
0.0214	0.018002		0.0394919	0.042771	0.0289449		0.0214	0.0153715		0.0152672	0.0423561	0.0352434		0.0214	0.00659477		0.0108701	0.0117851	0.00895604		0.0214	0.00399072		0.00456302	0.0113534	0.0112546
0.0216	0.0180835		0.0395643	0.0428741	0.0290099		0.0216	0.0154332		0.0152959	0.0424804	0.0353595		0.0216	0.00667621		0.0109425	0.0118881	0.00902107		0.0216	0.00405241		0.0045917	0.0114777	0.0113707
0.0218	0.018158		0.0396563	0.0429683	0.0290993		0.0218	0.0154886		0.0153213	0.0426308	0.0355124		0.0218	0.00675072		0.0110345	0.0119823	0.00911045		0.0218	0.00410778		0.0046171	0.0116281	0.0115235
0.022	0.0182233		0.0397814	0.0430545	0.0292097		0.022	0.0155266		0.0153368	0.0428031	0.0356852		0.022	0.00681606		0.0111596	0.0120686	0.00922082		0.022	0.00414578		0.00463255	0.0118005	0.0116964
0.0222	0.0182831		0.0399139	0.0431458	0.0293519		0.0222	0.015562		0.0153522	0.0429706	0.0358191		0.0222	0.00687585		0.0112921	0.0121598	0.00936302		0.0222	0.00418124		0.004648	0.0119679	0.0118302
0.0224	0.0183302		0.0400202	0.0432775	0.0295257		0.0224	0.0156003		0.0153695	0.0431192	0.0359079		0.0224	0.0069229		0.0113985	0.0122915	0.00953689		0.0224	0.00421951		0.00466535	0.0121165	0.0119191
0.0226	0.0183981		0.040093	0.0434554	0.0297378		0.0226	0.0156428		0.0153836	0.043279	0.0359864		0.0226	0.00699087		0.0114712	0.0124694	0.00974895		0.0226	0.00426204		0.00467937	0.0122763	0.0119976
0.0228	0.0184774		0.0401575	0.0436359	0.0299276		0.0228	0.0156977		0.0154016	0.0433882	0.036089		0.0228	0.00707011		0.0115357	0.0126499	0.00993877		0.0228	0.00431691		0.00469742	0.0123856	0.0121002
0.023	0.0185545		0.0402739	0.0437925	0.0300781		0.023	0.0157502		0.0154268	0.0434851	0.0362149		0.023	0.0071472		0.0116522	0.0128066	0.0100892		0.023	0.00436946		0.00472264	0.0124825	0.0122261
0.0232	0.0186286		0.0404212	0.0439335	0.0301957		0.0232	0.0157943		0.0154566	0.0436144	0.0363398		0.0232	0.00722137		0.0117994	0.0129475	0.0102068		0.0232	0.00441354		0.00475243	0.0126117	0.0123509
0.0234	0.0186855		0.0405814	0.0440678	0.0303203		0.0234	0.0158327		0.0154824	0.043766	0.0364812		0.0234	0.0072782		0.0119596	0.0130818	0.0103314		0.0234	0.00445188		0.00477821	0.0127633	0.0124923
0.0236	0.0187363		0.0407389	0.0442225	0.0304653		0.0236	0.0158594		0.0154985	0.043944	0.036628		0.0236	0.00732904		0.0121171	0.0132365	0.0104765		0.0236	0.00447859		0.00479426	0.0129413	0.0126391
0.0238	0.0187863		0.0408446	0.0443876	0.0306194		0.0238	0.0158727		0.015511	0.044117	0.0367502		0.0238	0.00737906		0.0122228	0.0134016	0.0106305		0.0238	0.00449195		0.00480684	0.0131143	0.0127613
0.024	0.0188376		0.0409041	0.0445871	0.0307904		0.024	0.015875		0.0155178	0.0442998	0.0368614		0.024	0.0074303		0.0122823	0.0136011	0.0108016		0.024	0.00449421		0.00481362	0.0132971	0.0128725
0.0242	0.0189031		0.0409803	0.044755	0.0309553		0.0242	0.0158881		0.0155266	0.0444964	0.0369789		0.0242	0.00749586		0.0123585	0.0137691	0.0109664		0.0242	0.00450737		0.00482243	0.0134937	0.01299
0.0244	0.0189714		0.041136	0.0449187	0.031104		0.0244	0.0158992		0.0155466	0.0446537	0.0371211		0.0244	0.0075641		0.0125142	0.0139327	0.0111151		0.0244	0.00451843		0.00484241	0.013651	0.0131323
0.0246	0.0190293		0.0413371	0.0450621	0.0312162		0.0246	0.0159065		0.0155772	0.0447602	0.0372414		0.0246	0.00762207		0.0127153	0.0140761	0.0112274		0.0246	0.00452574		0.00487304	0.0137576	0.0132525
0.0248	0.019073		0.0415084	0.0452136	0.0313046		0.0248	0.0159259		0.0156156	0.0448571	0.0373584		0.0248	0.00766573		0.0128866	0.0142276	0.0113158		0.0248	0.00454514		0.00491144	0.0138545	0.0133696
0.025	0.0191164		0.0416353	0.0453477	0.0314008		0.025	0.0159583		0.0156486	0.0449732	0.0375027		0.025	0.00770913		0.0130135	0.0143617	0.0114119		0.025	0.00457748		0.00494441	0.0139705	0.0135139
0.0252	0.0191577		0.0417266	0.0454943	0.0315218		0.0252	0.0160066		0.015674	0.0451014	0.0376404		0.0252	0.00775048		0.0131048	0.0145083	0.011533		0.0252	0.00462583		0.00496983	0.0140987	0.0136515
0.0254	0.0191929		0.0418006	0.0456657	0.0316217		0.0254	0.0160411		0.015694	0.0452158	0.0377428		0.0254	0.00778568		0.0131788	0.0146798	0.0116329		0.0254	0.0046603		0.00498975	0.0142131	0.0137539
0.0256	0.0192309		0.0418879	0.0458324	0.031716		0.0256	0.0160638		0.0157262	0.0453603	0.037822		0.0256	0.00782368		0.0132661	0.0148465	0.0117272		0.0256	0.004683		0.00502203	0.0143576	0.0138332
0.0258	0.019275		0.0419825	0.0459949	0.0318029		0.0258	0.0160774		0.0157606	0.045563	0.0379352		0.0258	0.00786773		0.0133607	0.015009	0.0118141		0.0258	0.00469663		0.00505642	0.0145603	0.0139463
0.026	0.0193385		0.0421052	0.0461701	0.0319021		0.026	0.0160949		0.0157976	0.0457366	0.0380668		0.026	0.00793122		0.0134834	0.0151842	0.0119132		0.026	0.00471413		0.00509338	0.0147339	0.0140779
0.0262	0.0193996		0.0422478	0.0463044	0.0320317		0.0262	0.0161145		0.0158348	0.045941	0.0381776		0.0262	0.00799234		0.013626	0.0153184	0.0120428		0.0262	0.00473374		0.00513062	0.0149384	0.0141887
0.0264	0.0194681		0.0424065	0.0464407	0.0321697		0.0264	0.0161306		0.0158748	0.0461509	0.0382589		0.0264	0.00806086		0.0137847	0.0154547	0.0121808		0.0264	0.00474987		0.00517063	0.0151482	0.0142701
0.0266	0.0195398		0.042569	0.0465669	0.0322998		0.0266	0.0161437		0.0159149	0.0463385	0.038313		0.0266	0.00813253		0.0139472	0.0155809	0.012311		0.0266	0.00476297		0.00521073	0.0153359	0.0143241
0.0268	0.0196189		0.0427174	0.0466809	0.0324191		0.0268	0.0161448		0.0159455	0.0464672	0.0383499		0.0268	0.0082116		0.0140956	0.0156949	0.0124302		0.0268	0.00476403		0.00524133	0.0154646	0.0143611
0.027	0.0197014		0.0428354	0.0468169	0.0325272		0.027	0.0161376		0.0159677	0.0465552	0.0383821		0.027	0.00829409		0.0142136	0.0158309	0.0125384		0.027	0.00475686		0.00526348	0.0155526	0.0143932
0.0272	0.0197905		0.0429729	0.046905	0.032626		0.0272	0.0161321		0.0160106	0.0466205	0.0384115		0.0272	0.00838328		0.0143511	0.015919	0.0126372		0.0272	0.00475132		0.00530644	0.0156178	0.0144226
0.0274	0.019874		0.0431421	0.0470556	0.0327157		0.0274	0.0161337		0.0160546	0.0467138	0.0384519		0.0274	0.00846669		0.0145203	0.0160696	0.0127269		0.0274	0.00475294		0.00535039	0.0157111	0.0144631
0.0276	0.0199413		0.0433203	0.0472445	0.0328009		0.0276	0.016146		0.016094	0.0468408	0.0385277		0.0276	0.00853402		0.0146985	0.0162585	0.012812		0.0276	0.00476524		0.00538985	0.0158381	0.0145388
0.0278	0.0200067		0.0435409	0.0474296	0.0328813		0.0278	0.0161454		0.0161196	0.0470043	0.0386139		0.0278	0.00859948		0.0149191	0.0164436	0.0128924		0.0278	0.00476468		0.00541543	0.0160016	0.014625
0.028	0.0200598		0.043805	0.0476	0.0329587		0.028	0.0161388		0.0161499	0.0471758	0.0386934		0.028	0.00865256		0.0151833	0.016614	0.0129699		0.028	0.00475804		0.0054457	0.0161732	0.0147045
0.0282	0.0201159		0.0440795	0.0477553	0.033022		0.0282	0.0161528		0.0161702	0.047301	0.0387704		0.0282	0.00870862		0.0154577	0.0167694	0.0130331		0.0282	0.00477207		0.005466	0.0162983	0.0147815
0.0284	0.0201898		0.0442908	0.0478895	0.0331052		0.0284	0.01617		0.0161772	0.0474831	0.0388693		0.0284	0.00878255		0.0156691	0.0169036	0.0131163		0.0284	0.00478921		0.00547299	0.0164804	0.0148805
0.0286	0.0202757		0.0444758	0.0479939	0.0331942		0.0286	0.0162111		0.0161992	0.0476995	0.0389759		0.0286	0.00886847		0.0158541	0.0170079	0.0132054		0.0286	0.00483029		0.00549499	0.0166969	0.014987
0.0288	0.0203592		0.0446672	0.0480914	0.0332609		0.0288	0.016277		0.0162466	0.0478978	0.0390701		0.0288	0.00895189		0.0160454	0.0171054	0.013272		0.0288	0.00489624		0.0055424	0.0168952	0.0150812
0.029	0.0204329		0.0448879	0.0481721	0.033307		0.029	0.0163646		0.016307	0.0480215	0.0391512		0.029	0.00902566		0.0162662	0.0171861	0.0133182		0.029	0.00498383		0.00560277	0.0170189	0.0151624
0.0292	0.020521		0.0450681	0.0482776	0.0333548		0.0292	0.0164443		0.0163563	0.048128	0.0392348		0.0292	0.00911373		0.0164463	0.0172916	0.0133659		0.0292	0.00506355		0.00565208	0.0171253	0.015246
0.0294	0.0206225		0.0451943	0.0483997	0.0333897		0.0294	0.016509		0.0163825	0.0482028	0.0393415		0.0294	0.00921529		0.0165725	0.0174138	0.0134008		0.0294	0.00512822		0.00567826	0.0172001	0.0153526
0.0296	0.0207174		0.0452673	0.048515	0.0334353		0.0296	0.0165504		0.0163993	0.0482892	0.0394679		0.0296	0.00931017		0.0166455	0.017529	0.0134465		0.0296	0.00516967		0.00569512	0.0172866	0.0154791
0.0298	0.0207944		0.0453368	0.0485937	0.0335038		0.0298	0.0165645		0.016448	0.0484249	0.0396041		0.0298	0.00938709		0.016715	0.0176077	0.0135149		0.0298	0.00518371		0.00574382	0.0174222	0.0156152
0.03	0.0208527		0.0454153	0.0486246	0.0336031		0.03	0.0165697		0.0165038	0.0485827	0.0397588		0.03	0.00944546		0.0167935	0.0176387	0.0136142		0.03	0.00518889		0.00579959	0.0175801	0.0157699
0.0302	0.0208998		0.0455045	0.0486808	0.0337259		0.0302	0.0165897		0.0165558	0.0487501	0.0399098		0.0302	0.00949254		0.0168828	0.0176948	0.0137371		0.0302	0.00520896		0.00585158	0.0177474	0.0159209
0.0304	0.0209523		0.0456528	0.0487392	0.0338403		0.0304	0.0166205		0.016584	0.048906	0.0400724		0.0304	0.00954503		0.017031	0.0177533	0.0138514		0.0304	0.00523974		0.00587975	0.0179033	0.0160836
0.0306	0.0210062		0.0458477	0.0487997	0.0339349		0.0306	0.0166583		0.0166012	0.0490463	0.0402201		0.0306	0.00959894		0.017226	0.0178138	0.013946		0.0306	0.00527751		0.005897	0.0180436	0.0162312
0.0308	0.0210561		0.0460651	0.0488543	0.0340484		0.0308	0.0167079		0.0166381	0.0492	0.040327		0.0308	0.00964882		0.0174433	0.0178683	0.0140595		0.0308	0.00532709		0.00593387	0.0181973	0.0163381
0.031	0.0211005		0.0462411	0.0489196	0.0341523		0.031	0.0167521		0.0166751	0.0493227	0.0404247		0.031	0.0096932		0.0176193	0.0179336	0.0141634		0.031	0.00537131		0.00597085	0.01832	0.0164359
0.0312	0.021148		0.0463689	0.0490125	0.0342313		0.0312	0.0167842		0.0167148	0.049424	0.0404985		0.0312	0.00974069		0.0177471	0.0180265	0.0142424		0.0312	0.0054034		0.00601064	0.0184213	0.0165097
0.0314	0.021187		0.0464633	0.0491332	0.0343082		0.0314	0.0168119		0.0167499	0.0495049	0.0405822		0.0314	0.00977969		0.0178416	0.0181472	0.0143194		0.0314	0.00543114		0.00604574	0.0185022	0.0165933
0.0316	0.0212241		0.0466042	0.0492336	0.034381		0.0316	0.0168367		0.0167821	0.0495601	0.0406842		0.0316	0.00981688		0.0179824	0.0182476	0.0143922		0.0316	0.00545593		0.0060779	0.0185574	0.0166954
0.0318	0.0212738		0.0468065	0.0493267	0.0344632		0.0318	0.0168724		0.0168086	0.049666	0.0407794		0.0318	0.00986652		0.0181847	0.0183407	0.0144743		0.0318	0.00549165		0.00610444	0.0186633	0.0167905
0.032	0.0213317		0.0470028	0.049451	0.034556		0.032	0.0169075		0.0168213	0.0498225	0.0408891		0.032	0.00992439		0.0183811	0.018465	0.0145672		0.032	0.00552677		0.00611712	0.0188198	0.0169003
0.0322	0.0213967		0.0471506	0.0495971	0.0346797		0.0322	0.0169464		0.0168268	0.0499727	0.04104		0.0322	0.00998945		0.0185288	0.0186112	0.0146908		0.0322	0.00556568		0.00612257	0.01897	0.0170511
0.0324	0.0214715		0.0472916	0.0497205	0.0348211		0.0324	0.0169865		0.0168392	0.0500935	0.0412108		0.0324	0.0100642		0.0186699	0.0187346	0.0148322		0.0324	0.00560575		0.00613497	0.0190909	0.0172219
0.0326	0.0215512		0.0474425	0.0498316	0.0349984		0.0326	0.0170306		0.0168552	0.0502278	0.0413748		0.0326	0.0101439		0.0188208	0.0188456	0.0150096		0.0326	0.00564986		0.00615102	0.0192251	0.0173859
0.0328	0.0216324		0.0476001	0.0499298	0.0351679		0.0328	0.0170753		0.0168768	0.0503481	0.0415147		0.0328	0.0102252		0.0189783	0.0189439	0.015179		0.0328	0.00569455		0.00617264	0.0193454	0.0175259
0.033	0.021724		0.0477576	0.0500103	0.0352898		0.033	0.0171187		0.0168981	0.0504375	0.0416351		0.033	0.0103167		0.0191358	0.0190244	0.0153009		0.033	0.00573794		0.00619385	0.0194349	0.0176462
0.0332	0.021797		0.0479304	0.0501094	0.0353695		0.0332	0.0171531		0.0169175	0.0505671	0.041768		0.0332	0.0103897		0.0193086	0.0191234	0.0153807		0.0332	0.00577233		0.00621327	0.0195645	0.0177791
0.0334	0.0218575		0.0481126	0.0502052	0.0354334		0.0334	0.0171832		0.0169365	0.0506815	0.0418965		0.0334	0.0104503		0.0194908	0.0192193	0.0154445		0.0334	0.00580239		0.00623226	0.0196789	0.0179076
0.0336	0.0219304		0.0483149	0.0503142	0.0355051		0.0336	0.0172063		0.0169543	0.0508257	0.0420355		0.0336	0.0105231		0.0196931	0.0193282	0.0155162		0.0336	0.00582554		0.00625015	0.0198231	0.0180467
0.0338	0.0220154		0.0484932	0.0504181	0.0355734		0.0338	0.0172216		0.0169714	0.0510032	0.0421699		0.0338	0.0106082		0.0198714	0.0194322	0.0155846		0.0338	0.00584087		0.00626724	0.0200006	0.018181
0.034	0.0221056		0.0486636	0.0505151	0.0356518		0.034	0.0172307		0.0169919	0.0511676	0.0422778		0.034	0.0106983		0.0200418	0.0195292	0.015663		0.034	0.00584997		0.00628773	0.0201649	0.0182889
0.0342	0.0222036		0.0488518	0.0505815	0.0357374		0.0342	0.0172386		0.0170194	0.0513248	0.0423596		0.0342	0.0107964		0.0202301	0.0195955	0.0157485		0.0342	0.00585788		0.00631517	0.0203221	0.0183708
0.0344	0.0223065		0.0490464	0.0506246	0.0358369		0.0344	0.0172514		0.0170498	0.0514679	0.0424547		0.0344	0.0108992		0.0204246	0.0196387	0.015848		0.0344	0.00587064		0.0063456	0.0204653	0.0184658
0.0346	0.0224039		0.0492456	0.050685	0.0359474		0.0346	0.017266		0.0170831	0.0515446	0.0425588		0.0346	0.0109966		0.0206238	0.019699	0.0159586		0.0346	0.00588522		0.00637894	0.0205419	0.0185699
0.0348	0.0225102		0.0494299	0.0507822	0.0360501		0.0348	0.0172861		0.017111	0.0515734	0.0426362		0.0348	0.011103		0.0208082	0.0197962	0.0160612		0.0348	0.00590535		0.00640681	0.0205707	0.0186473
0.035	0.0226178		0.0496095	0.0508962	0.0361573		0.035	0.0173045		0.017129	0.0516393	0.0426731		0.035	0.0112105		0.0209877	0.0199103	0.0161684		0.035	0.00592371		0.00642478	0.0206366	0.0186843
0.0352	0.0227056		0.0498051	0.0510381	0.0362729		0.0352	0.0173276		0.0171509	0.0517055	0.0427215		0.0352	0.0112983		0.0211833	0.0200521	0.016284		0.0352	0.00594682		0.00644666	0.0207029	0.0187326
0.0354	0.0227977		0.0500151	0.0511767	0.0363739		0.0354	0.017354		0.0171819	0.0517742	0.0427905		0.0354	0.0113904		0.0213933	0.0201907	0.016385		0.0354	0.0059732		0.00647771	0.0207715	0.0188016
0.0356	0.0228908		0.0502586	0.0513239	0.0364483		0.0356	0.017382		0.0172196	0.0518547	0.0428804		0.0356	0.0114836		0.0216368	0.020338	0.0164595		0.0356	0.00600125		0.00651535	0.0208521	0.0188915
0.0358	0.0229786		0.0504786	0.0514566	0.0365151		0.0358	0.0174077		0.0172593	0.0519207	0.0430011		0.0358	0.0115714		0.0218568	0.0204707	0.0165262		0.0358	0.00602689		0.00655515	0.020918	0.0190122
0.036	0.0230674		0.0505998	0.0515501	0.0365692		0.036	0.0174311		0.0173054	0.0519858	0.0431504		0.036	0.0116601		0.021978	0.0205642	0.0165803		0.036	0.00605037		0.00660123	0.0209832	0.0191615
0.0362	0.0231457		0.0506236	0.0516388	0.0366478		0.0362	0.0174517		0.0173541	0.0520608	0.0432742		0.0362	0.0117384		0.0220018	0.0206528	0.016659		0.0362	0.00607096		0.00664993	0.0210581	0.0192854
0.0364	0.0232069		0.0506817	0.0517174	0.0367592		0.0364	0.0174778		0.0174004	0.0521275	0.0433622		0.0364	0.0117996		0.02206	0.0207315	0.0167704		0.0364	0.006097		0.00669617	0.0211249	0.0193734
0.0366	0.0232986		0.0508335	0.0518185	0.0369355		0.0366	0.0175105		0.0174307	0.0521902	0.0434801		0.0366	0.0118914		0.0222117	0.0208325	0.0169466		0.0366	0.00612975		0.00672654	0.0211875	0.0194912
0.0368	0.0233951		0.0510212	0.0519726	0.037117		0.0368	0.0175379		0.0174425	0.0522403	0.0436415		0.0368	0.0119878		0.0223994	0.0209867	0.0171281		0.0368	0.0061571		0.00673827	0.0212377	0.0196526
0.037	0.0234816		0.0511953	0.0521712	0.0373027		0.037	0.0175617		0.0174526	0.0522938	0.0438016		0.037	0.0120744		0.0225736	0.0211853	0.0173139		0.037	0.00618091		0.00674842	0.0212911	0.0198128
0.0372	0.0235571		0.0513554	0.052351	0.0374793		0.0372	0.0175822		0.0174685	0.0523223	0.0439491		0.0372	0.0121498		0.0227336	0.021365	0.0174904		0.0372	0.00620143		0.00676429	0.0213197	0.0199603
0.0374	0.0236262		0.0514713	0.052519	0.0376488		0.0374	0.0176109		0.0174847	0.0523763	0.0440734		0.0374	0.0122189		0.0228495	0.0215331	0.0176599		0.0374	0.00623012		0.00678047	0.0213736	0.0200845
0.0376	0.0236889		0.0515383	0.0526603	0.0377993		0.0376	0.0176454		0.0175129	0.0524843	0.0441675		0.0376	0.0122816		0.0229165	0.0216744	0.0178104		0.0376	0.00626462		0.00680875	0.0214817	0.0201786
0.0378	0.0237515		0.0515858	0.052753	0.0379085		0.0378	0.017679		0.017547	0.0526155	0.0442313		0.0378	0.0123443		0.022964	0.021767	0.0179196		0.0378	0.00629819		0.00684278	0.0216128	0.0202425
0.038	0.0238266		0.0516165	0.0528248	0.0379991		0.038	0.0177052		0.0175843	0.0527573	0.044276		0.038	0.0124193		0.0229947	0.0218389	0.0180103		0.038	0.00632442		0.00688006	0.0217547	0.0202872
0.0382	0.0239034		0.0516903	0.0529244	0.0380902		0.0382	0.0177247		0.0176174	0.0528763	0.0443099		0.0382	0.0124962		0.0230685	0.0219384	0.0181013		0.0382	0.00634395		0.00691316	0.0218736	0.020321
0.0384	0.0239976		0.051812	0.0530295	0.0381939		0.0384	0.0177512		0.0176438	0.0529795	0.0443497		0.0384	0.0125904		0.0231902	0.0220435	0.0182051		0.0384	0.00637044		0.00693962	0.0219768	0.0203608
0.0386	0.0240975		0.0519476	0.0531361	0.0383148		0.0386	0.0177814		0.0176627	0.0530816	0.0444086		0.0386	0.0126903		0.0233259	0.0221502	0.018326		0.0386	0.00640062		0.00695851	0.022079	0.0204197
0.0388	0.0241723		0.0520949	0.0532188	0.0384218		0.0388	0.0178006		0.0176785	0.0531773	0.0445015		0.0388	0.012765		0.0234731	0.0222328	0.0184329		0.0388	0.00641985		0.00697431	0.0221747	0.0205127
0.039	0.0242635		0.0522483	0.0533013	0.038556		0.039	0.0178163		0.0176984	0.0532857	0.0446085		0.039	0.0128563		0.0236266	0.0223154	0.0185672		0.039	0.00643556		0.00699423	0.0222831	0.0206197
0.0392	0.0243662		0.0523855	0.0533882	0.0386874		0.0392	0.0178463		0.0177327	0.053387	0.0447113		0.0392	0.0129589		0.0237637	0.0224022	0.0186986		0.0392	0.00646555		0.00702851	0.0223843	0.0207224
0.0394	0.0244575		0.0525045	0.053499	0.0388035		0.0394	0.0178998		0.01778	0.0534667	0.0447924		0.0394	0.0130503		0.0238827	0.022513	0.0188146		0.0394	0.006519		0.00707584	0.022464	0.0208036
0.0396	0.0245337		0.0525951	0.0536529	0.038895		0.0396	0.0179478		0.0178281	0.053533	0.0448468		0.0396	0.0131264		0.0239733	0.022667	0.0189062		0.0396	0.00656701		0.00712392	0.0225304	0.020858
0.0398	0.0246121		0.0526552	0.0538177	0.0389874		0.0398	0.0179848		0.0178658	0.0536251	0.0448979		0.0398	0.0132049		0.0240334	0.0228317	0.0189986		0.0398	0.00660407		0.00716164	0.0226225	0.020909
0.04	0.0247		0.052716	0.0539701	0.0390805		0.04	0.0180356		0.0178888	0.0537183	0.0449714		0.04	0.0132927		0.0240942	0.0229841	0.0190916		0.04	0.0066548		0.00718465	0.0227156	0.0209825
0.0402	0.024773		0.052755	0.0540964	0.0391665		0.0402	0.01808		0.0179242	0.0538027	0.045077		0.0402	0.0133657		0.0241332	0.0231104	0.0191776		0.0402	0.00669923		0.00722001	0.0228	0.0210881
0.0404	0.0248527		0.052782	0.0542086	0.0392646		0.0404	0.0181168		0.0179773	0.0539082	0.0451985		0.0404	0.0134454		0.0241602	0.0232227	0.0192758		0.0404	0.00673607		0.00727311	0.0229055	0.0212097
0.0406	0.0249377		0.0528526	0.0543022	0.0393575		0.0406	0.0181086		0.0180326	0.0540172	0.0453486		0.0406	0.0135304		0.0242309	0.0233162	0.0193687		0.0406	0.0067278		0.00732836	0.0230146	0.0213597
0.0408	0.0250178		0.05293	0.0543493	0.0394462		0.0408	0.0181002		0.0181075	0.0540984	0.0454864		0.0408	0.0136106		0.0243082	0.0233633	0.0194574		0.0408	0.00671944		0.00740326	0.0230957	0.0214976
0.041	0.0250911		0.0530015	0.0543938	0.0395458		0.041	0.0180956		0.0181894	0.0541943	0.0456104		0.041	0.0136838		0.0243797	0.0234079	0.0195569		0.041	0.0067148		0.00748517	0.0231916	0.0216215
0.0412	0.0251592		0.0530465	0.0544361	0.0396983		0.0412	0.0180975		0.018271	0.0542767	0.0457392		0.0412	0.013752		0.0244248	0.0234501	0.0197095		0.0412	0.00671668		0.00756681	0.0232741	0.0217503
0.0414	0.0252648		0.053081	0.0544799	0.0398386		0.0414	0.018116		0.0183528	0.0544084	0.0458562		0.0414	0.0138575		0.0244592	0.023494	0.0198497		0.0414	0.00673519		0.00764861	0.0234058	0.0218674
0.0416	0.0253734		0.0531605	0.0545383	0.0399726		0.0416	0.0181389		0.018435	0.0545078	0.0459523		0.0416	0.0139661		0.0245387	0.0235523	0.0199837		0.0416	0.0067581		0.00773076	0.0235052	0.0219635
0.0418	0.0254811		0.0532567	0.0546006	0.0400957		0.0418	0.0181624		0.0185407	0.0546335	0.0460404		0.0418	0.0140738		0.0246349	0.0236147	0.0201069		0.0418	0.00678166		0.00783646	0.0236309	0.0220516
0.042	0.0255834		0.0533922	0.0546714	0.0402028		0.042	0.01818		0.0186635	0.0547357	0.0461403		0.042	0.0141762		0.0247704	0.0236855	0.020214		0.042	0.00679926		0.00795933	0.023733	0.0221514
0.0422	0.0256741		0.0535486	0.0547589	0.0402816		0.0422	0.0181966		0.0187604	0.0547533	0.0463005		0.0422	0.0142669		0.0249269	0.023773	0.0202928		0.0422	0.00681586		0.00805617	0.0237507	0.0223116
0.0424	0.0257518		0.0536548	0.054871	0.0403517		0.0424	0.0182147		0.0188372	0.0548435	0.0464587		0.0424	0.0143446		0.025033	0.023885	0.0203629		0.0424	0.00683394		0.008133	0.0238408	0.0224698
0.0426	0.0258294		0.0537638	0.0549892	0.0404291		0.0426	0.018236		0.0189315	0.0549913	0.0465903		0.0426	0.0144221		0.025142	0.0240032	0.0204402		0.0426	0.00685522		0.00822728	0.0239886	0.0226014
0.0428	0.0259214		0.0538876	0.0551226	0.0405394		0.0428	0.0182458		0.019032	0.0552006	0.0466595		0.0428	0.0145142		0.0252658	0.0241366	0.0205505		0.0428	0.00686508		0.00832782	0.024198	0.0226707
0.043	0.0260428		0.0540709	0.0552472	0.0406699		0.043	0.0182459		0.0191204	0.0554212	0.0467267		0.043	0.0146356		0.0254491	0.0242613	0.020681		0.043	0.00686516		0.00841624	0.0244185	0.0227378
0.0432	0.0261636		0.0542888	0.0553652	0.0407818		0.0432	0.0182343		0.0192088	0.0557031	0.0468259		0.0432	0.0147563		0.025667	0.0243793	0.0207929		0.0432	0.00685353		0.00850463	0.0247004	0.0228371
0.0434	0.0262631		0.0544477	0.0554858	0.04087		0.0434	0.0182219		0.0193178	0.0559523	0.0469582		0.0434	0.0148558		0.025826	0.0244999	0.0208811		0.0434	0.00684118		0.00861363	0.0249497	0.0229693
0.0436	0.0263501		0.0545528	0.055637	0.0409427		0.0436	0.0182243		0.0194275	0.0560992	0.0471355		0.0436	0.0149429		0.025931	0.024651	0.0209538		0.0436	0.00684353		0.0087233	0.0250966	0.0231467
0.0438	0.0264398		0.0547142	0.055841	0.0410207		0.0438	0.0182424		0.0195183	0.0561405	0.0473098		0.0438	0.0150325		0.0260924	0.0248551	0.0210319		0.0438	0.00686159		0.00881406	0.0251379	0.0233209
0.044	0.0265443		0.0548868	0.0560776	0.0411318		0.044	0.0182563		0.0195706	0.0562627	0.0474375		0.044	0.015137		0.026265	0.0250916	0.0211429		0.044	0.00687556		0.00886639	0.02526	0.0234486
0.0442	0.0266624		0.0550579	0.0562877	0.0412666		0.0442	0.0182531		0.0196091	0.0564932	0.0475677		0.0442	0.0152551		0.0264361	0.0253017	0.0212777		0.0442	0.00687234		0.00890492	0.0254905	0.0235788
0.0444	0.0267657		0.0552314	0.0564636	0.0414312		0.0444	0.0182438		0.019679	0.056776	0.0477034		0.0444	0.0153584		0.0266096	0.0254776	0.0214424		0.0444	0.00686306		0.00897485	0.0257734	0.0237146
0.0446	0.0268356		0.0553902	0.0566039	0.0415929		0.0446	0.0182436		0.0197629	0.0570191	0.0478231		0.0446	0.0154284		0.0267684	0.0256179	0.0216041		0.0446	0.00686282		0.00905869	0.0260165	0.0238342
0.0448	0.0268821		0.055551	0.0567005	0.0417286		0.0448	0.0182465		0.0198452	0.0572208	0.0479357		0.0448	0.0154749		0.0269292	0.0257145	0.0217398		0.0448	0.00686571		0.00914102	0.0262181	0.0239469
0.045	0.0269465		0.0556842	0.0567742	0.0418827		0.045	0.0182548		0.0199189	0.0573957	0.0480107		0.045	0.0155393		0.0270624	0.0257883	0.0218938		0.045	0.006874		0.00921472	0.026393	0.0240218
0.0452	0.0270353		0.0557928	0.0567693	0.0420277		0.0452	0.01826		0.019985	0.0575619	0.0480658		0.0452	0.0156281		0.027171	0.0257833	0.0220389		0.0452	0.00687925		0.00928084	0.0265592	0.0240769
0.0454	0.0271236		0.0558918	0.0568026	0.0421502		0.0454	0.0182552		0.0200441	0.0577146	0.0480942		0.0454	0.0157164		0.0272701	0.0258166	0.0221613		0.0454	0.00687446		0.00933986	0.0267119	0.0241053
0.0456	0.0272004		0.0559902	0.0568695	0.0422701		0.0456	0.0182571		0.0201051	0.0578699	0.0481436		0.0456	0.0157931		0.0273684	0.0258836	0.0222812		0.0456	0.00687636		0.00940092	0.0268672	0.0241547
0.0458	0.0272565		0.0560738	0.056948	0.0423792		0.0458	0.0182633		0.0201604	0.0579884	0.0482215		0.0458	0.0158492		0.027452	0.0259621	0.0223903		0.0458	0.00688256		0.00945622	0.0269858	0.0242327
0.046	0.0272985		0.0561311	0.0570877	0.0424622		0.046	0.0182692		0.0202193	0.0581113	0.0483135		0.046	0.0158912		0.0275093	0.0261018	0.0224733		0.046	0.00688844		0.00951515	0.0271086	0.0243246
0.0462	0.0273441		0.0562248	0.0572222	0.0425547		0.0462	0.0182758		0.0202657	0.0582505	0.0484244		0.0462	0.0159368		0.0276031	0.0262362	0.0225659		0.0462	0.00689503		0.0095615	0.0272479	0.0244355
0.0464	0.0274041		0.0563142	0.0573244	0.0426455		0.0464	0.0182814		0.0202942	0.058429	0.0485435		0.0464	0.0159968		0.0276925	0.0263384	0.0226567		0.0464	0.00690062		0.00959001	0.0274263	0.0245546
0.0466	0.0274711		0.0564	0.0573789	0.0427379		0.0466	0.0182854		0.0203346	0.0585867	0.048646		0.0466	0.0160638		0.0277782	0.0263929	0.0227491		0.0466	0.00690463		0.00963036	0.0275841	0.0246572
0.0468	0.0275545		0.0565078	0.0574413	0.0428457		0.0468	0.0183043		0.0203774	0.0587639	0.0487015		0.0468	0.0161472		0.0278861	0.0264554	0.0228568		0.0468	0.00692351		0.00967318	0.0277613	0.0247127
0.047	0.0276441		0.0565859	0.0574923	0.0429528		0.047	0.0183369		0.0204124	0.0590003	0.0487749		0.047	0.0162368		0.0279641	0.0265063	0.0229639		0.047	0.00695613		0.00970824	0.0279976	0.024786
0.0472	0.0277251		0.056626	0.0575531	0.0430266		0.0472	0.0183803		0.0204533	0.0592326	0.0488984		0.0472	0.0163178		0.0280042	0.0265672	0.0230378		0.0472	0.0069995		0.00974913	0.02823	0.0249095
0.0474	0.0277916		0.0566566	0.0576688	0.0430789		0.0474	0.0184246		0.0204916	0.0594517	0.0490302		0.0474	0.0163843		0.0280349	0.0266828	0.02309		0.0474	0.00704387		0.0097874	0.028449	0.0250413
0.0476	0.0278379		0.0567147	0.0577609	0.0431155		0.0476	0.0184662		0.0205214	0.0596039	0.0491452		0.0476	0.0164306		0.0280929	0.0267749	0.0231267		0.0476	0.00708545		0.00981722	0.0286012	0.0251563
0.0478	0.0278734		0.056796	0.0578239	0.0431514		0.0478	0.0185076		0.0205366	0.0597333	0.0492279		0.0478	0.0164662		0.0281743	0.0268379	0.0231625		0.0478	0.00712684		0.00983245	0.0287307	0.0252391
0.048	0.0279135		0.0568794	0.0578878	0.0432281		0.048	0.0185531		0.0205324	0.0598648	0.0493216		0.048	0.0165063		0.0282577	0.0269019	0.0232392		0.048	0.00717229		0.0098282	0.0288622	0.0253327
0.0482	0.0279597		0.0569506	0.0579617	0.0433346		0.0482	0.0186217		0.0205352	0.0600087	0.0493964		0.0482	0.0165524		0.0283288	0.0269758	0.0233457		0.0482	0.00724093		0.00983105	0.0290061	0.0254075
0.0484	0.0280206		0.0570455	0.0580227	0.0434474		0.0484	0.0186948		0.0205547	0.0601433	0.0494816		0.0484	0.0166133		0.0284237	0.0270367	0.0234586		0.0484	0.00731408		0.00985053	0.0291406	0.0254928
0.0486	0.0280919		0.0571581	0.0580874	0.0435825		0.0486	0.0187493		0.0205834	0.0602548	0.0495688		0.0486	0.0166846		0.0285364	0.0271014	0.0235937		0.0486	0.00736855		0.00987918	0.0292521	0.0255799
0.0488	0.0281671		0.0572545	0.05815	0.0437216		0.0488	0.018778		0.0205999	0.0603548	0.0496586		0.0488	0.0167598		0.0286327	0.0271641	0.0237327		0.0488	0.00739721		0.00989572	0.0293521	0.0256698
0.049	0.0282397		0.0573546	0.0582114	0.0438445		0.049	0.0187828		0.0206502	0.0604218	0.0497715		0.049	0.0168325		0.0287328	0.0272255	0.0238556		0.049	0.00740205		0.00994597	0.0294191	0.0257827
0.0492	0.0282998		0.0574462	0.0582627	0.0439456		0.0492	0.0188127		0.0207022	0.0604615	0.0498926		0.0492	0.0168926		0.0288244	0.0272767	0.0239567		0.0492	0.00743191		0.009998	0.0294589	0.0259037
0.0494	0.0283489		0.0575419	0.0583235	0.0440409		0.0494	0.0188642		0.0207395	0.0605261	0.0500154		0.0494	0.0169416		0.0289202	0.0273376	0.024052		0.0494	0.00748339		0.0100354	0.0295234	0.0260266
0.0496	0.0284176		0.0576328	0.0583906	0.0441659		0.0496	0.0189105		0.0207506	0.0606099	0.0501259		0.0496	0.0170103		0.029011	0.0274046	0.024177		0.0496	0.00752976		0.0100464	0.0296072	0.026137
0.0498	0.0285019		0.0577049	0.0584794	0.0443054		0.0498	0.0189575		0.0207707	0.0607168	0.0502303		0.0498	0.0170946		0.0290831	0.0274934	0.0243165		0.0498	0.00757677		0.0100665	0.0297141	0.0262415
0.05	0.0285828		0.0577731	0.0585518	0.0444716		0.05	0.0190082		0.0208123	0.0607969	0.0503294		0.05	0.0171755		0.0291513	0.0275658	0.0244828		0.05	0.00762744		0.0101081	0.0297943	0.0263406
0.0502	0.028645		0.0578551	0.0586315	0.0446633		0.0502	0.0190719		0.0208642	0.0608421	0.0504365		0.0502	0.0172377		0.0292333	0.0276455	0.0246745		0.0502	0.00769109		0.01016	0.0298394	0.0264476
0.0504	0.0287235		0.0579491	0.0587636	0.0448738		0.0504	0.0191372		0.020917	0.0609234	0.0505617		0.0504	0.0173163		0.0293273	0.0277776	0.0248849		0.0504	0.00775646		0.0102128	0.0299207	0.0265728
0.0506	0.0288135		0.0580468	0.0588469	0.0450515		0.0506	0.0191978		0.0209717	0.0609876	0.0506827		0.0506	0.0174062		0.029425	0.0278609	0.0250627		0.0506	0.00781702		0.0102675	0.0299849	0.0266938
0.0508	0.028909		0.0580997	0.0588564	0.0451624		0.0508	0.0192506		0.0210076	0.060996	0.0507875		0.0508	0.0175017		0.029478	0.0278705	0.0251735		0.0508	0.00786983		0.0103034	0.0299933	0.0267987
0.051	0.0290059		0.058124	0.0588157	0.0452466		0.051	0.0192911		0.0210254	0.0609795	0.0508751		0.051	0.0175987		0.0295022	0.0278297	0.0252577		0.051	0.00791033		0.0103212	0.0299768	0.0268863
0.0512	0.029097		0.0580985	0.0588205	0.0453396		0.0512	0.0193193		0.0210222	0.0609704	0.0509492		0.0512	0.0176898		0.0294767	0.0278346	0.0253508		0.0512	0.00793854		0.010318	0.0299677	0.0269603
0.0514	0.0291933		0.0580933	0.0588709	0.0454693		0.0514	0.0193414		0.0210282	0.0609477	0.0510493		0.0514	0.017786		0.0294715	0.0278849	0.0254804		0.0514	0.00796058		0.010324	0.0299451	0.0270604
0.0516	0.0292677		0.0581272	0.0589735	0.0456014		0.0516	0.0193677		0.0210657	0.0609624	0.051167		0.0516	0.0178605		0.0295054	0.0279875	0.0256125		0.0516	0.00798689		0.0103615	0.0299597	0.0271781
0.0518	0.0293215		0.0581722	0.0590857	0.0457151		0.0518	0.0193917		0.0211205	0.0610244	0.0512785		0.0518	0.0179143		0.0295504	0.0280998	0.0257263		0.0518	0.00801096		0.0104163	0.0300218	0.0272897
0.052	0.0293853		0.0581825	0.0591977	0.0457982		0.052	0.0194169		0.021192	0.0611367	0.0514162		0.052	0.017978		0.0295607	0.0282117	0.0258093		0.052	0.00803612		0.0104878	0.030134	0.0274274
0.0522	0.0294672		0.0582129	0.0593305	0.045901		0.0522	0.0194366		0.0212807	0.0612586	0.0515928		0.0522	0.0180599		0.0295912	0.0283445	0.0259121		0.0522	0.00805582		0.0105765	0.030256	0.0276039
0.0524	0.0295592		0.0582504	0.0594358	0.0460414		0.0524	0.0194507		0.0213791	0.0613534	0.0517847		0.0524	0.018152		0.0296286	0.0284499	0.0260525		0.0524	0.00806992		0.0106749	0.0303507	0.0277959
0.0526	0.0296533		0.0582838	0.0595589	0.0461982		0.0526	0.019464		0.0215076	0.061464	0.0519347		0.0526	0.018246		0.029662	0.028573	0.0262094		0.0526	0.00808323		0.0108034	0.0304613	0.0279458
0.0528	0.0297372		0.0583407	0.0596486	0.0463552		0.0528	0.0194913		0.0216308	0.0615703	0.0520247		0.0528	0.01833		0.029719	0.0286626	0.0263663		0.0528	0.00811056		0.0109266	0.0305676	0.0280359
0.053	0.0298075		0.0583917	0.0597232	0.0465205		0.053	0.0195269		0.0217465	0.0616428	0.0520865		0.053	0.0184002		0.02977	0.0287373	0.0265316		0.053	0.00814616		0.0110423	0.0306401	0.0280977
0.0532	0.0298631		0.0584649	0.0597839	0.046687		0.0532	0.019559		0.0218685	0.061683	0.0521324		0.0532	0.0184559		0.0298431	0.028798	0.0266981		0.0532	0.00817824		0.0111643	0.0306804	0.0281435
0.0534	0.0299164		0.0585546	0.059829	0.0468198		0.0534	0.0195791		0.022017	0.0617572	0.0521837		0.0534	0.0185092		0.0299328	0.028843	0.0268309		0.0534	0.00819837		0.0113128	0.0307545	0.0281948
0.0536	0.0299579		0.0586492	0.0598681	0.0469162		0.0536	0.01959		0.0221864	0.0618385	0.0522144		0.0536	0.0185507		0.0300274	0.0288821	0.0269273		0.0536	0.00820923		0.0114822	0.0308358	0.0282255
0.0538	0.0300003		0.0587324	0.0599307	0.0470153		0.0538	0.019614		0.0223524	0.0619565	0.0522784		0.0538	0.018593		0.0301106	0.0289447	0.0270264		0.0538	0.0082332		0.0116482	0.0309538	0.0282895
0.054	0.0300469		0.0587856	0.0600085	0.0471075		0.054	0.019633		0.0225026	0.0620893	0.0523742		0.054	0.0186397		0.0301638	0.0290225	0.0271187		0.054	0.00825221		0.0117984	0.0310866	0.0283853
0.0542	0.0300995		0.0587927	0.0601367	0.0471963		0.0542	0.0196547		0.0226423	0.0622404	0.0525037		0.0542	0.0186923		0.0301709	0.0291507	0.0272074		0.0542	0.00827396		0.0119381	0.0312377	0.0285148
0.0544	0.030161		0.0587879	0.0603094	0.0472803		0.0544	0.019675		0.0228016	0.0623771	0.0526337		0.0544	0.0187538		0.0301661	0.0293234	0.0272914		0.0544	0.00829422		0.0120974	0.0313745	0.0286449
0.0546	0.0302218		0.0588057	0.0605016	0.047354		0.0546	0.0196937		0.0229606	0.0624689	0.0527457		0.0546	0.0188146		0.030184	0.0295156	0.0273652		0.0546	0.00831297		0.0122564	0.0314663	0.0287569
0.0548	0.030281		0.0588643	0.0606625	0.0474026		0.0548	0.0197026		0.0231076	0.0626354	0.052832		0.0548	0.0188738		0.0302425	0.0296766	0.0274138		0.0548	0.0083218		0.0124034	0.0316327	0.0288431
0.055	0.0303409		0.0589643	0.0607495	0.047453		0.055	0.0197111		0.0232465	0.0627299	0.0528991		0.055	0.0189337		0.0303426	0.0297635	0.0274641		0.055	0.00833029		0.0125423	0.0317273	0.0289102
0.0552	0.0304045		0.0590814	0.0607534	0.0475084		0.0552	0.0197213		0.0233616	0.0628296	0.052937		0.0552	0.0189972		0.0304596	0.0297675	0.0275196		0.0552	0.0083405		0.0126574	0.0318269	0.0289481
0.0554	0.0304637		0.0591956	0.0607605	0.0475778		0.0554	0.0197387		0.0234331	0.0628583	0.0529605		0.0554	0.0190565		0.0305738	0.0297745	0.0275889		0.0554	0.00835789		0.0127289	0.0318556	0.0289716
0.0556	0.030518		0.0593031	0.0608158	0.047625		0.0556	0.0197551		0.02348	0.062834	0.0529555		0.0556	0.0191107		0.0306813	0.0298298	0.0276362		0.0556	0.00837431		0.0127758	0.0318314	0.0289666
0.0558	0.030564		0.0593934	0.0609117	0.0476656		0.0558	0.0197756		0.0234981	0.0628459	0.0529514		0.0558	0.0191568		0.0307716	0.0299257	0.0276768		0.0558	0.00839485		0.0127939	0.0318433	0.0289626
0.056	0.0306183		0.0594717	0.061047	0.0477064		0.056	0.0197897		0.0235106	0.0628516	0.0529945		0.056	0.019211		0.03085	0.030061	0.0277176		0.056	0.00840888		0.0128064	0.0318489	0.0290057
0.0562	0.0306845		0.0595371	0.0611578	0.0477649		0.0562	0.0198042		0.0235669	0.0628464	0.0530451		0.0562	0.0192772		0.0309153	0.0301718	0.027776		0.0562	0.00842345		0.0128628	0.0318438	0.0290563
0.0564	0.030772		0.0596258	0.0612044	0.0478404		0.0564	0.0198298		0.0236587	0.0628438	0.0530988		0.0564	0.0193648		0.031004	0.0302184	0.0278516		0.0564	0.00844906		0.0129545	0.0318412	0.02911
0.0566	0.0308699		0.0597632	0.0611938	0.0479102		0.0566	0.0198459		0.0237586	0.0628702	0.053132		0.0566	0.0194627		0.0311415	0.0302078	0.0279214		0.0566	0.00846511		0.0130544	0.0318675	0.0291432
0.0568	0.0309636		0.0599274	0.0611808	0.0480071		0.0568	0.019837		0.0238588	0.0629434	0.0531531		0.0568	0.0195564		0.0313056	0.0301948	0.0280183		0.0568	0.00845618		0.0131546	0.0319408	0.0291642
0.057	0.0310506		0.0600911	0.0611623	0.0481083		0.057	0.0198211		0.023927	0.0630024	0.0531722		0.057	0.0196434		0.0314693	0.0301764	0.0281195		0.057	0.00844032		0.0132228	0.0319997	0.0291834
0.0572	0.0311207		0.0602594	0.061184	0.048193		0.0572	0.0198044		0.0239501	0.0630372	0.0532074		0.0572	0.0197134		0.0316376	0.030198	0.0282042		0.0572	0.00842363		0.0132459	0.0320345	0.0292185
0.0574	0.0311825		0.0604206	0.0612448	0.0482929		0.0574	0.0197815		0.0239162	0.0630286	0.0532649		0.0574	0.0197752		0.0317988	0.0302588	0.028304		0.0574	0.0084007		0.013212	0.032026	0.029276
0.0576	0.0312455		0.0605628	0.0612911	0.0484135		0.0576	0.0197596		0.0238891	0.0629835	0.0533502		0.0576	0.0198383		0.031941	0.0303052	0.0284246		0.0576	0.00837883		0.0131849	0.0319809	0.0293614
0.0578	0.031304		0.0606906	0.0613311	0.0485638		0.0578	0.0197637		0.0238971	0.0629147	0.0534144		0.0578	0.0198967		0.0320688	0.0303451	0.0285749		0.0578	0.0083829		0.0131929	0.031912	0.0294255
0.058	0.0313801		0.0607854	0.0613816	0.0487126		0.058	0.019796		0.0239499	0.0629008	0.05345		0.058	0.0199729		0.0321636	0.0303957	0.0287237		0.058	0.0084152		0.0132457	0.0318981	0.0294612
0.0582	0.0314865		0.0609468	0.0614742	0.0488582		0.0582	0.0198231		0.0240413	0.0629563	0.0534603		0.0582	0.0200792		0.032325	0.0304882	0.0288694		0.0582	0.00844231		0.0133371	0.0319537	0.0294714
0.0584	0.031604		0.0611283	0.0615747	0.0489887		0.0584	0.0198217		0.0241114	0.0629645	0.0534818		0.0584	0.0201967		0.0325065	0.0305888	0.0289999		0.0584	0.00844088		0.0134072	0.0319618	0.0294929
0.0586	0.0316966		0.0613155	0.0616613	0.049074		0.0586	0.0198136		0.0241599	0.0630055	0.0535434		0.0586	0.0202893		0.0326938	0.0306753	0.0290851		0.0586	0.00843278		0.0134557	0.0320029	0.0295545
0.0588	0.0317687		0.0614717	0.0616861	0.0491219		0.0588	0.0198101		0.0241934	0.0630221	0.0536453		0.0588	0.0203615		0.03285	0.0307001	0.0291331		0.0588	0.00842932		0.0134892	0.0320194	0.0296564
0.059	0.0318583		0.0616064	0.0616891	0.0491504		0.059	0.0197953		0.0242089	0.0630201	0.0537644		0.059	0.020451		0.0329846	0.0307031	0.0291615		0.059	0.00841449		0.0135047	0.0320175	0.0297755
0.0592	0.0319518		0.0617163	0.0616929	0.0491715		0.0592	0.0197745		0.0242158	0.0630116	0.0538789		0.0592	0.0205446		0.0330945	0.0307069	0.0291826		0.0592	0.00839378		0.0135116	0.0320089	0.0298901
0.0594	0.032037		0.0618104	0.0616747	0.0491918		0.0594	0.0197874		0.0242234	0.0630292	0.0539861		0.0594	0.0206297		0.0331886	0.0306888	0.0292029		0.0594	0.00840661		0.0135192	0.0320265	0.0299972
0.0596	0.0320975		0.0619219	0.061689	0.0492253		0.0596	0.0198328		0.0242539	0.0630881	0.0540724		0.0596	0.0206902		0.0333001	0.0307031	0.0292364		0.0596	0.00845203		0.0135497	0.0320854	0.0300835
0.0598	0.0321649		0.0620588	0.0617264	0.0492735		0.0598	0.0198935		0.0242931	0.0632028	0.0541354		0.0598	0.0207576		0.0334371	0.0307404	0.0292846		0.0598	0.00851269		0.0135889	0.0322001	0.0301466
0.06	0.0322424		0.062199	0.0618127	0.0493258		0.06	0.0199324		0.024329	0.0633588	0.0541735		0.06	0.0208351		0.0335772	0.0308267	0.0293369		0.06	0.00855165		0.0136248	0.0323561	0.0301846
0.0602	0.0323229		0.0623409	0.0619107	0.0493826		0.0602	0.0199373		0.024354	0.0635118	0.0542257		0.0602	0.0209156		0.0337191	0.0309247	0.0293938		0.0602	0.00855656		0.0136498	0.0325092	0.0302369
0.0604	0.0323979		0.0624618	0.0619605	0.0494611		0.0604	0.0199346		0.024375	0.0635737	0.0542546		0.0604	0.0209906		0.03384	0.0309745	0.0294723		0.0604	0.00855387		0.0136708	0.032571	0.0302658
0.0606	0.0324649		0.062582	0.0619699	0.0495232		0.0606	0.0199451		0.0243846	0.0636061	0.0542607		0.0606	0.0210576		0.0339602	0.0309839	0.0295343		0.0606	0.0085643		0.0136804	0.0326034	0.0302718
0.0608	0.0325195		0.0626918	0.0620222	0.0495891		0.0608	0.0199711		0.024387	0.0636198	0.0542409		0.0608	0.0211122		0.0340701	0.0310362	0.0296002		0.0608	0.00859033		0.0136828	0.0326171	0.0302521
0.061	0.0325745		0.0628245	0.0620983	0.0496655		0.061	0.0199984		0.0244051	0.0636509	0.0542067		0.061	0.0211672		0.0342028	0.0311124	0.0296766		0.061	0.00861766		0.0137009	0.0326482	0.0302179
0.0612	0.0326219		0.0629737	0.0622223	0.0497509		0.0612	0.0200322		0.0244324	0.0637074	0.0541852		0.0612	0.0212146		0.0343519	0.0312364	0.0297621		0.0612	0.00865146		0.0137282	0.0327048	0.0301964
0.0614	0.0326655		0.0631112	0.0623517	0.0498527		0.0614	0.0200555		0.0244614	0.0637716	0.054171		0.0614	0.0212582		0.0344894	0.0313657	0.0298639		0.0614	0.00867478		0.0137572	0.0327689	0.0301821
0.0616	0.0327189		0.0632539	0.0624332	0.0499736		0.0616	0.0200705		0.0244871	0.0638837	0.0541421		0.0616	0.0213116		0.0346321	0.0314473	0.0299848		0.0616	0.0086897		0.0137829	0.032881	0.0301533
0.0618	0.0327773		0.0633753	0.0625209	0.0500822		0.0618	0.0200933		0.0244888	0.0639631	0.0541308		0.0618	0.02137		0.0347535	0.0315349	0.0300933		0.0618	0.00871249		0.0137846	0.0329604	0.030142
0.062	0.0328384		0.0634397	0.0626217	0.0501787		0.062	0.0201205		0.0245032	0.0640758	0.0541658		0.062	0.0214312		0.0348179	0.0316357	0.0301898		0.062	0.00873972		0.013799	0.0330731	0.0301769
0.0622	0.0329202		0.0634854	0.0627546	0.0503087		0.0622	0.0201545		0.0245137	0.0641863	0.0541907		0.0622	0.021513		0.0348636	0.0317687	0.0303199		0.0622	0.0087737		0.0138095	0.0331836	0.0302018
0.0624	0.0330475		0.0636005	0.0628538	0.0504152		0.0624	0.0201826		0.0245185	0.0642704	0.0542032		0.0624	0.0216402		0.0349787	0.0318679	0.0304263		0.0624	0.00880184		0.0138143	0.0332677	0.0302144
0.0626	0.0331887		0.0637608	0.0629525	0.0505044		0.0626	0.0201895		0.0245182	0.0643523	0.0542136		0.0626	0.0217815		0.035139	0.0319666	0.0305156		0.0626	0.0088087		0.013814	0.0333497	0.0302247
0.0628	0.0333066		0.0638866	0.0630392	0.0505583		0.0628	0.0201931		0.0245272	0.0644583	0.0542229		0.0628	0.0218994		0.0352649	0.0320533	0.0305694		0.0628	0.00881234		0.013823	0.0334556	0.0302341
0.063	0.0333669		0.0639764	0.0631336	0.0505895		0.063	0.0202022		0.0245422	0.0645401	0.0542201		0.063	0.0219596		0.0353546	0.0321476	0.0306006		0.063	0.00882139		0.013838	0.0335374	0.0302313
0.0632	0.0334384		0.0640771	0.0632414	0.0506492		0.0632	0.020208		0.0245624	0.064619	0.0542046		0.0632	0.0220312		0.0354553	0.0322555	0.0306603		0.0632	0.00882724		0.0138582	0.0336163	0.0302157
0.0634	0.0335341		0.0642592	0.0633254	0.0507347		0.0634	0.0202007		0.0245662	0.0646562	0.0542245		0.0634	0.0221269		0.0356375	0.0323395	0.0307459		0.0634	0.00881993		0.013862	0.0336536	0.0302356
0.0636	0.0336279		0.0645195	0.0633807	0.0508208		0.0636	0.0201747		0.0245507	0.0646212	0.0542468		0.0636	0.0222206		0.0358977	0.0323948	0.0308319		0.0636	0.00879391		0.0138465	0.0336185	0.030258
0.0638	0.0337122		0.064717	0.0634776	0.0509347		0.0638	0.0201591		0.0245344	0.0645747	0.054281		0.0638	0.022305		0.0360953	0.0324916	0.0309458		0.0638	0.00877835		0.0138302	0.033572	0.0302922
0.064	0.0337927		0.0648288	0.0636003	0.0510781		0.064	0.0201734		0.0245221	0.0645712	0.0543679		0.064	0.0223854		0.0362071	0.0326143	0.0310893		0.064	0.00879258		0.0138179	0.0335685	0.0303791
0.0642	0.0338487		0.0649048	0.0637003	0.051233		0.0642	0.0201857		0.024507	0.0646077	0.0544875		0.0642	0.0224414		0.036283	0.0327143	0.0312441		0.0642	0.00880494		0.0138028	0.0336051	0.0304987
0.0644	0.0339104		0.0649639	0.0637819	0.0513742		0.0644	0.0201899		0.0244966	0.0646906	0.0545961		0.0644	0.0225032		0.0363421	0.032796	0.0313854		0.0644	0.00880908		0.0137924	0.033688	0.0306073
0.0646	0.0339957		0.0650587	0.0638363	0.0514896		0.0646	0.020178		0.0244991	0.0647952	0.0547539		0.0646	0.0225885		0.0364369	0.0328504	0.0315007		0.0646	0.00879725		0.0137949	0.0337926	0.030765
0.0648	0.0340904		0.0652022	0.0638836	0.0515717		0.0648	0.0201515		0.0245063	0.0648769	0.0548856		0.0648	0.0226831		0.0365804	0.0328977	0.0315829		0.0648	0.00877071		0.0138021	0.0338743	0.0308967
0.065	0.0341848		0.0653865	0.0639381	0.0516114		0.065	0.0201234		0.0245178	0.0648976	0.0549629		0.065	0.0227775		0.0367647	0.0329522	0.0316225		0.065	0.00874261		0.0138136	0.0338949	0.030974
0.0652	0.0342712		0.0655635	0.0639767	0.0516794		0.0652	0.0201296		0.0245268	0.0649022	0.0550087		0.0652	0.022864		0.0369417	0.0329908	0.0316905		0.0652	0.0087488		0.0138226	0.0338996	0.0310199
0.0654	0.0343511		0.0656737	0.0640147	0.0517439		0.0654	0.020159		0.0245409	0.0649018	0.0550499		0.0654	0.0229438		0.0370519	0.0330287	0.031755		0.0654	0.0087782		0.0138367	0.0338992	0.031061
0.0656	0.0344338		0.065716	0.0640229	0.0518121		0.0656	0.0201711		0.0245593	0.0648712	0.055078		0.0656	0.0230266		0.0370942	0.0330369	0.0318233		0.0656	0.00879034		0.0138551	0.0338685	0.0310891
0.0658	0.0345254		0.06575	0.0640251	0.0518603		0.0658	0.020157		0.0245788	0.0648342	0.0550621		0.0658	0.0231182		0.0371282	0.0330391	0.0318715		0.0658	0.00877621		0.0138746	0.0338315	0.0310732
0.066	0.0345904		0.0658387	0.0640522	0.0518842		0.066	0.0201446		0.0246055	0.064779	0.0550223		0.066	0.0231831		0.0372169	0.0330662	0.0318953		0.066	0.00876381		0.0139014	0.0337763	0.0310334
0.0662	0.0346399		0.0659838	0.064142	0.0519426		0.0662	0.0201252		0.0246407	0.0647109	0.0550212		0.0662	0.0232326		0.037362	0.033156	0.0319538		0.0662	0.00874442		0.0139365	0.0337083	0.0310323
0.0664	0.0346925		0.066154	0.0642876	0.052019		0.0664	0.0201101		0.0246796	0.0647364	0.0550489		0.0664	0.0232852		0.0375322	0.0333016	0.0320301		0.0664	0.00872929		0.0139754	0.0337337	0.03106
0.0666	0.0347661		0.0662826	0.0644249	0.0520739		0.0666	0.0201227		0.0247053	0.0647886	0.0550675		0.0666	0.0233589		0.0376609	0.0334389	0.032085		0.0666	0.00874197		0.0140011	0.033786	0.0310786
0.0668	0.0348532		0.0663926	0.0645483	0.0521399		0.0668	0.0201595		0.0247221	0.0648676	0.0550824		0.0668	0.0234459		0.0377709	0.0335623	0.032151		0.0668	0.00877874		0.0140179	0.033865	0.0310935
0.067	0.0349217		0.066495	0.0646814	0.0521867		0.067	0.0202111		0.0247427	0.0649758	0.0550709		0.067	0.0235144		0.0378732	0.0336954	0.0321978		0.067	0.00883034		0.0140385	0.0339731	0.031082
0.0672	0.0349782		0.0665904	0.064811	0.0522363		0.0672	0.0202767		0.0247923	0.0650739	0.0550095		0.0672	0.0235709		0.0379686	0.033825	0.0322475		0.0672	0.00889594		0.0140881	0.0340712	0.0310206
0.0674	0.0350408		0.0666817	0.0649459	0.0522781		0.0674	0.020334		0.0248579	0.0651698	0.0549802		0.0674	0.0236335		0.03806	0.03396	0.0322893		0.0674	0.00895319		0.0141537	0.0341672	0.0309914
0.0676	0.0351252		0.0667694	0.0650602	0.052305		0.0676	0.0203712		0.0249238	0.0652667	0.0549727		0.0676	0.023718		0.0381476	0.0340743	0.0323161		0.0676	0.00899041		0.0142196	0.0342641	0.0309838
0.0678	0.0352055		0.0668511	0.0651855	0.0522885		0.0678	0.0203977		0.0250339	0.0653767	0.0549419		0.0678	0.0237983		0.0382293	0.0341995	0.0322996		0.0678	0.00901696		0.0143297	0.034374	0.030953
0.068	0.0352671		0.0669295	0.0653472	0.0523055		0.068	0.0204373		0.0251652	0.06547	0.0549071		0.068	0.0238598		0.0383077	0.0343612	0.0323166		0.068	0.00905654		0.0144611	0.0344674	0.0309182
0.0682	0.0353092		0.0670326	0.0655075	0.0523625		0.0682	0.0204816		0.0253159	0.0655755	0.0548781		0.0682	0.0239019		0.0384108	0.0345216	0.0323736		0.0682	0.00910079		0.0146117	0.0345728	0.0308892
0.0684	0.0353441		0.0671525	0.0656399	0.0524254		0.0684	0.0205112		0.0254746	0.0656485	0.0548658		0.0684	0.0239369		0.0385307	0.034654	0.0324366		0.0684	0.00913044		0.0147704	0.0346458	0.0308769
0.0686	0.0353925		0.0672802	0.0657362	0.0525129		0.0686	0.0205513		0.0255812	0.0657448	0.0548738		0.0686	0.0239853		0.0386584	0.0347503	0.032524		0.0686	0.00917056		0.014877	0.0347421	0.0308849
0.0688	0.0354422		0.0673971	0.065838	0.0526072		0.0688	0.0205983		0.025661	0.06584	0.0549088		0.0688	0.0240349		0.0387753	0.034852	0.0326183		0.0688	0.00921758		0.0149568	0.0348373	0.0309199
0.069	0.0355017		0.0674807	0.0658923	0.0526953		0.069	0.0206371		0.0257528	0.0659477	0.0549607		0.069	0.0240945		0.0388589	0.0349063	0.0327064		0.069	0.00925628		0.0150486	0.0349451	0.0309719
0.0692	0.0355658		0.0675662	0.0659429	0.0527941		0.0692	0.0206746		0.0258682	0.0660421	0.0549935		0.0692	0.0241586		0.0389444	0.0349569	0.0328053		0.0692	0.00929386		0.015164	0.0350395	0.0310046
0.0694	0.03563		0.0676257	0.0659899	0.0528769		0.0694	0.0206949		0.0259939	0.0661187	0.0550234		0.0694	0.0242227		0.0390039	0.035004	0.032888		0.0694	0.00931416		0.0152897	0.035116	0.0310346
0.0696	0.0356805		0.0677156	0.0660281	0.0529202		0.0696	0.0207059		0.0261118	0.0661886	0.0550772		0.0696	0.0242733		0.0390938	0.0350421	0.0329313		0.0696	0.00932508		0.0154076	0.0351859	0.0310883
0.0698	0.0357195		0.067822	0.0660683	0.0529702		0.0698	0.0207274		0.0262152	0.0662313	0.0551735		0.0698	0.0243122		0.0392002	0.0350823	0.0329813		0.0698	0.00934659		0.015511	0.0352287	0.0311847
0.07	0.0357408		0.0679124	0.0661368	0.0529986		0.07	0.0207511		0.0263231	0.0662925	0.0552567		0.07	0.0243336		0.0392906	0.0351508	0.0330097		0.07	0.00937031		0.0156189	0.0352899	0.0312679
0.0702	0.0357637		0.0680169	0.0662271	0.0530404		0.0702	0.0207484		0.0264178	0.0663345	0.0552674		0.0702	0.0243564		0.0393951	0.0352411	0.0330515		0.0702	0.00936765		0.0157136	0.0353318	0.0312785
0.0704	0.0358039		0.0681192	0.0663485	0.0531018		0.0704	0.0207733		0.0264735	0.0663981	0.0552567		0.0704	0.0243967		0.0394975	0.0353626	0.0331129		0.0704	0.00939253		0.0157693	0.0353954	0.0312679
0.0706	0.0358323		0.0682327	0.0664849	0.0531764		0.0706	0.0208039		0.0265036	0.0665072	0.0552798		0.0706	0.024425		0.0396109	0.0354989	0.0331875		0.0706	0.00942314		0.0157994	0.0355045	0.0312909
0.0708	0.0358614		0.0684171	0.0665757	0.0532436		0.0708	0.0208324		0.0265293	0.0665478	0.0553637		0.0708	0.0244542		0.0397953	0.0355898	0.0332547		0.0708	0.00945164		0.0158251	0.0355451	0.0313749
0.071	0.0358933		0.0685954	0.0666399	0.0532868		0.071	0.0208828		0.0265844	0.0665455	0.0554845		0.071	0.024486		0.0399736	0.035654	0.033298		0.071	0.00950204		0.0158802	0.0355429	0.0314957
0.0712	0.0359286		0.0687295	0.0667384	0.0533047		0.0712	0.0209318		0.0266535	0.0665439	0.0555808		0.0712	0.0245213		0.0401077	0.0357525	0.0333158		0.0712	0.00955103		0.0159493	0.0355413	0.0315919
0.0714	0.035965		0.0688611	0.0668756	0.0533138		0.0714	0.0209652		0.0267145	0.0665756	0.0556344		0.0714	0.0245578		0.0402393	0.0358896	0.033325		0.0714	0.00958443		0.0160103	0.035573	0.0316455
0.0716	0.0360127		0.0689209	0.0670201	0.0533181		0.0716	0.0209904		0.0267855	0.0666464	0.0556292		0.0716	0.0246054		0.0402991	0.0360341	0.0333292		0.0716	0.00960967		0.0160813	0.0356437	0.0316403
0.0718	0.0360474		0.0689445	0.0671702	0.0533435		0.0718	0.0210149		0.0268697	0.0667472	0.0556161		0.0718	0.0246401		0.0403227	0.0361843	0.0333547		0.0718	0.00963411		0.0161655	0.0357445	0.0316272
0.072	0.0360968		0.0689698	0.0672737	0.0533968		0.072	0.021037		0.0269573	0.0668883	0.055599		0.072	0.0246895		0.040348	0.0362877	0.0334079		0.072	0.00965625		0.0162531	0.0358856	0.0316102
0.0722	0.0361708		0.0690423	0.0673821	0.0534238		0.0722	0.0210709		0.0270101	0.0670242	0.0555902		0.0722	0.0247635		0.0404206	0.0363961	0.0334349		0.0722	0.0096901		0.0163059	0.0360216	0.0316013
0.0724	0.0362479		0.0691427	0.0674511	0.053462		0.0724	0.0211097		0.0270351	0.0670578	0.0555848		0.0724	0.0248406		0.0405209	0.0364651	0.0334731		0.0724	0.00972895		0.0163309	0.0360551	0.031596
0.0726	0.0363183		0.0692074	0.0675286	0.0535025		0.0726	0.0211535		0.0270722	0.0670262	0.0555849		0.0726	0.0249111		0.0405856	0.0365426	0.0335136		0.0726	0.00977274		0.0163681	0.0360235	0.031596
0.0728	0.0363639		0.0692675	0.0676663	0.0535406		0.0728	0.0211864		0.0271115	0.0670163	0.055524		0.0728	0.0249566		0.0406457	0.0366803	0.0335518		0.0728	0.00980558		0.0164073	0.0360137	0.0315351
0.073	0.0364094		0.0693093	0.0678727	0.0536118		0.073	0.0211897		0.0271652	0.0670176	0.0554416		0.073	0.0250021		0.0406876	0.0368867	0.033623		0.073	0.00980896		0.016461	0.0360149	0.0314527
0.0732	0.0364553		0.0693381	0.0680956	0.053698		0.0732	0.0211961		0.0272262	0.0670081	0.0553861		0.0732	0.025048		0.0407164	0.0371096	0.0337092		0.0732	0.0098153		0.016522	0.0360054	0.0313973
0.0734	0.0365022		0.0693786	0.0683084	0.0537686		0.0734	0.0212143		0.0272717	0.0669921	0.0553838		0.0734	0.0250949		0.0407568	0.0373224	0.0337798		0.0734	0.0098335		0.0165675	0.0359894	0.0313949
0.0736	0.036548		0.0694273	0.0684875	0.053822		0.0736	0.0212506		0.0273243	0.066994	0.0554209		0.0736	0.0251407		0.0408055	0.0375015	0.0338332		0.0736	0.00986984		0.0166201	0.0359914	0.0314321
0.0738	0.0365999		0.0694732	0.0686401	0.0538572		0.0738	0.0213086		0.0274313	0.066935	0.0554263		0.0738	0.0251927		0.0408514	0.0376542	0.0338683		0.0738	0.00992783		0.0167271	0.0359323	0.0314374
0.074	0.0366653		0.0695208	0.068743	0.0539227		0.074	0.0213736		0.0275317	0.06686	0.0553893		0.074	0.0252581		0.040899	0.037757	0.0339339		0.074	0.00999287		0.0168275	0.0358574	0.0314004
0.0742	0.036746		0.069584	0.0687759	0.0539936		0.0742	0.021403		0.0276121	0.0668245	0.0553446		0.0742	0.0253387		0.0409622	0.03779	0.0340047		0.0742	0.0100222		0.0169079	0.0358218	0.0313557
0.0744	0.0368346		0.069627	0.0688039	0.0539837		0.0744	0.0214166		0.027657	0.0668052	0.0553206		0.0744	0.0254274		0.0410052	0.0378179	0.0339948		0.0744	0.0100359		0.0169528	0.0358025	0.0313318
0.0746	0.0368846		0.0696565	0.0688865	0.0539398		0.0746	0.0214449		0.027683	0.0667691	0.0553615		0.0746	0.0254773		0.0410347	0.0379005	0.033951		0.0746	0.0100641		0.0169788	0.0357665	0.0313727
0.0748	0.0369163		0.0697071	0.0689855	0.0539374		0.0748	0.0214914		0.0277313	0.0667364	0.0554697		0.0748	0.025509		0.0410853	0.0379995	0.0339485		0.0748	0.0101106		0.0170271	0.0357337	0.0314808
0.075	0.0369411		0.0697771	0.0690245	0.0539597		0.075	0.0215428		0.0277908	0.0667517	0.0556085		0.075	0.0255339		0.0411553	0.0380385	0.0339708		0.075	0.010162		0.0170866	0.0357491	0.0316196
0.0752	0.0369738		0.0698699	0.0690722	0.0540196		0.0752	0.0215954		0.0278603	0.066835	0.0557377		0.0752	0.0255665		0.0412481	0.0380862	0.0340308		0.0752	0.0102146		0.0171561	0.0358324	0.0317488
0.0754	0.0370209		0.0700104	0.0691984	0.0541018		0.0754	0.0216396		0.0279416	0.0668899	0.0558392		0.0754	0.0256137		0.0413886	0.0382124	0.0341129		0.0754	0.0102588		0.0172374	0.0358872	0.0318503
0.0756	0.0370714		0.0701636	0.0693367	0.0542232		0.0756	0.0216575		0.0280105	0.0669065	0.0558978		0.0756	0.0256641		0.0415419	0.0383508	0.0342343		0.0756	0.0102767		0.0173063	0.0359038	0.031909
0.0758	0.0371244		0.0703473	0.0694355	0.0543577		0.0758	0.021664		0.0280726	0.0669458	0.0558864		0.0758	0.0257172		0.0417255	0.0384495	0.0343688		0.0758	0.0102833		0.0173684	0.0359431	0.0318976
0.076	0.0371736		0.0705207	0.0694814	0.054494		0.076	0.0216782		0.0281303	0.0670635	0.0559066		0.076	0.0257663		0.0418989	0.0384954	0.0345051		0.076	0.0102975		0.0174261	0.0360608	0.0319177
0.0762	0.0372383		0.0706121	0.0694908	0.0546301		0.0762	0.0216988		0.0281858	0.067133	0.0559538		0.0762	0.0258311		0.0419904	0.0385048	0.0346413		0.0762	0.010318		0.0174816	0.0361303	0.0319649
0.0764	0.0373018		0.0706386	0.0694555	0.0547143		0.0764	0.0217256		0.0282507	0.0671821	0.0560817		0.0764	0.0258945		0.0420168	0.0384696	0.0347255		0.0764	0.0103448		0.0175465	0.0361795	0.0320928
0.0766	0.0373668		0.0706715	0.0694288	0.0547995		0.0766	0.0217515		0.0283134	0.0672026	0.0562093		0.0766	0.0259595		0.0420498	0.0384428	0.0348106		0.0766	0.0103707		0.0176092	0.0361999	0.0322204
0.0768	0.0374351		0.0706936	0.0694159	0.0549145		0.0768	0.0217726		0.0283684	0.067223	0.0563132		0.0768	0.0260278		0.0420718	0.0384299	0.0349256		0.0768	0.0103918		0.0176642	0.0362204	0.0323243
0.077	0.0374938		0.0707999	0.0693849	0.0550595		0.077	0.0217796		0.0284078	0.0672327	0.0564147		0.077	0.0260865		0.0421781	0.0383989	0.0350707		0.077	0.0103988		0.0177036	0.0362301	0.0324258
0.0772	0.0375559		0.0709433	0.0693394	0.055217		0.0772	0.0217738		0.0284589	0.067236	0.0565185		0.0772	0.0261486		0.0423216	0.0383535	0.0352282		0.0772	0.0103931		0.0177547	0.0362333	0.0325296
0.0774	0.0376303		0.0710646	0.0693418	0.0553383		0.0774	0.0217694		0.0285078	0.0672774	0.0565998		0.0774	0.0262231		0.0424429	0.0383559	0.0353495		0.0774	0.0103887		0.0178036	0.0362747	0.0326109
0.0776	0.0376999		0.071161	0.0693526	0.05544		0.0776	0.0217609		0.0285518	0.0672915	0.0566744		0.0776	0.0262926		0.0425392	0.0383666	0.0354511		0.0776	0.0103801		0.0178476	0.0362889	0.0326856
0.0778	0.0377438		0.0712663	0.0693993	0.0555034		0.0778	0.0217408		0.0286296	0.0673014	0.0567293		0.0778	0.0263365		0.0426446	0.0384133	0.0355146		0.0778	0.01036		0.0179254	0.0362987	0.0327404
0.078	0.0377814		0.0713691	0.0694469	0.0555501		0.078	0.0217189		0.0287187	0.0673814	0.0567788		0.078	0.0263741		0.0427473	0.038461	0.0355612		0.078	0.0103381		0.0180145	0.0363787	0.03279
0.0782	0.0378257		0.0714895	0.0694918	0.0556116		0.0782	0.0217278		0.0288028	0.0674571	0.0568358		0.0782	0.0264184		0.0428678	0.0385058	0.0356228		0.0782	0.010347		0.0180986	0.0364544	0.032847
0.0784	0.0378718		0.071598	0.0695174	0.0556847		0.0784	0.0217632		0.0288638	0.0675631	0.0569001		0.0784	0.0264645		0.0429762	0.0385314	0.0356958		0.0784	0.0103824		0.0181596	0.0365604	0.0329112
0.0786	0.0379213		0.0716768	0.0695928	0.0557332		0.0786	0.0218305		0.028894	0.0677302	0.0569696		0.0786	0.026514		0.043055	0.0386069	0.0357444		0.0786	0.0104497		0.0181898	0.0367275	0.0329808
0.0788	0.0379591		0.0717713	0.0697393	0.0557542		0.0788	0.0218873		0.0289511	0.0679473	0.0570716		0.0788	0.0265519		0.0431496	0.0387534	0.0357653		0.0788	0.0105065		0.018247	0.0369446	0.0330828
0.079	0.0379878		0.0718694	0.069927	0.0557548		0.079	0.0219258		0.0290402	0.0681527	0.0571668		0.079	0.0265806		0.0432476	0.038941	0.0357659		0.079	0.0105451		0.018336	0.03715	0.033178
0.0792	0.0380376		0.0719476	0.0700557	0.0557697		0.0792	0.0219498		0.0291465	0.0682467	0.0572238		0.0792	0.0266304		0.0433258	0.0390698	0.0357808		0.0792	0.0105691		0.0184423	0.0372441	0.0332349
0.0794	0.0380996		0.0719728	0.070148	0.0558009		0.0794	0.0219436		0.0292457	0.0683267	0.0572232		0.0794	0.0266923		0.043351	0.039162	0.0358121		0.0794	0.0105628		0.0185415	0.037324	0.0332343
0.0796	0.0381326		0.0719738	0.0702431	0.0558534		0.0796	0.0219274		0.0292939	0.0684141	0.0572378		0.0796	0.0267253		0.043352	0.0392571	0.0358646		0.0796	0.0105467		0.0185897	0.0374114	0.0332489
0.0798	0.0381996		0.0720331	0.070295	0.0559006		0.0798	0.0219285		0.0293163	0.0685603	0.0573093		0.0798	0.0267923		0.0434114	0.0393091	0.0359118		0.0798	0.0105478		0.0186121	0.0375576	0.0333205
0.08	0.0382634		0.0722039	0.0703759	0.0559839		0.08	0.0219729		0.0293801	0.0686931	0.0574458		0.08	0.0268561		0.0435822	0.0393899	0.035995		0.08	0.0105921		0.0186759	0.0376904	0.0334569
0.0802	0.0383256		0.0724258	0.0704721	0.0560726		0.0802	0.0220401		0.0294569	0.0688235	0.0575629		0.0802	0.0269183		0.043804	0.0394861	0.0360838		0.0802	0.0106594		0.0187527	0.0378208	0.0335741
0.0804	0.0384048		0.0726589	0.0705759	0.0561265		0.0804	0.0221135		0.0295266	0.068968	0.0576236		0.0804	0.0269975		0.0440371	0.0395899	0.0361376		0.0804	0.0107328		0.0188224	0.0379653	0.0336348
0.0806	0.0384858		0.0728217	0.0706459	0.0561963		0.0806	0.0221678		0.029593	0.0690392	0.0576763		0.0806	0.0270786		0.0441999	0.0396599	0.0362075		0.0806	0.0107871		0.0188888	0.0380365	0.0336875
0.0808	0.038566		0.0728916	0.0707008	0.0562918		0.0808	0.022191		0.0296723	0.0691387	0.0577891		0.0808	0.0271587		0.0442698	0.0397148	0.036303		0.0808	0.0108103		0.0189681	0.038136	0.0338002
0.081	0.0386436		0.0729549	0.07074	0.0564093		0.081	0.0222101		0.0297174	0.0693167	0.0578987		0.081	0.0272363		0.0443331	0.039754	0.0364205		0.081	0.0108293		0.0190132	0.038314	0.0339098
0.0812	0.0387274		0.0730452	0.0707617	0.0565297		0.0812	0.0222449		0.0296732	0.0694708	0.0579774		0.0812	0.0273202		0.0444234	0.0397758	0.0365409		0.0812	0.0108642		0.018969	0.0384681	0.0339885
0.0814	0.0387891		0.0731514	0.0707895	0.0566048		0.0814	0.0222926		0.029632	0.0695493	0.0580111		0.0814	0.0273818		0.0445296	0.0398036	0.0366159		0.0814	0.0109119		0.0189278	0.0385466	0.0340223
0.0816	0.0388587		0.0732458	0.0707914	0.0566736		0.0816	0.0223315		0.0296199	0.0696419	0.058066		0.0816	0.0274514		0.044624	0.0398055	0.0366847		0.0816	0.0109507		0.0189157	0.0386393	0.0340771
0.0818	0.0389676		0.0733752	0.0707829	0.0567483		0.0818	0.0223784		0.0296383	0.0697861	0.0581094		0.0818	0.0275604		0.0447534	0.039797	0.0367595		0.0818	0.0109976		0.0189341	0.0387834	0.0341205
0.082	0.0390967		0.0735143	0.0708661	0.0568162		0.082	0.0224429		0.029694	0.069893	0.0581231		0.082	0.0276894		0.0448925	0.0398801	0.0368273		0.082	0.0110621		0.0189898	0.0388904	0.0341342
0.0822	0.0392171		0.0736059	0.0709794	0.0568685		0.0822	0.0225076		0.0297089	0.070006	0.0581073		0.0822	0.0278098		0.0449841	0.0399935	0.0368797		0.0822	0.0111269		0.0190047	0.0390033	0.0341185
0.0824	0.0393324		0.0737065	0.0710646	0.0569098		0.0824	0.0225428		0.0296963	0.0702172	0.0580953		0.0824	0.0279251		0.0450847	0.0400787	0.036921		0.0824	0.011162		0.0189921	0.0392145	0.0341064
0.0826	0.0394286		0.0738519	0.0711719	0.0569678		0.0826	0.0225918		0.0297082	0.0703947	0.0580668		0.0826	0.0280213		0.0452301	0.0401859	0.0369789		0.0826	0.0112111		0.019004	0.0393921	0.0340779
0.0828	0.0394946		0.0739906	0.0713551	0.0570016		0.0828	0.0226689		0.0297386	0.0705092	0.0580711		0.0828	0.0280874		0.0453688	0.0403691	0.0370128		0.0828	0.0112882		0.0190344	0.0395065	0.0340823
0.083	0.0395476		0.0740635	0.0715185	0.0570279		0.083	0.0227424		0.0297564	0.0706078	0.0580997		0.083	0.0281403		0.0454418	0.0405326	0.0370391		0.083	0.0113616		0.0190522	0.0396052	0.0341108
0.0832	0.0396263		0.0740612	0.0716211	0.0570699		0.0832	0.0228052		0.0297365	0.070693	0.0581499		0.0832	0.028219		0.0454395	0.0406352	0.037081		0.0832	0.0114245		0.0190323	0.0396904	0.034161
0.0834	0.0397146		0.074032	0.0717207	0.0571129		0.0834	0.0228474		0.0297155	0.0707664	0.0582067		0.0834	0.0283073		0.0454102	0.0407347	0.037124		0.0834	0.0114666		0.0190113	0.0397637	0.0342179
0.0836	0.0397835		0.074022	0.0718248	0.0571269		0.0836	0.0228688		0.0297242	0.0708561	0.058258		0.0836	0.0283763		0.0454002	0.0408389	0.037138		0.0836	0.0114881		0.01902	0.0398534	0.0342691
0.0838	0.0398516		0.0740299	0.071936	0.0571199		0.0838	0.0228797		0.0297235	0.0710395	0.0583109		0.0838	0.0284443		0.0454081	0.0409501	0.037131		0.0838	0.0114989		0.0190193	0.0400368	0.0343221
0.084	0.0399018		0.0740518	0.07207	0.0571332		0.084	0.0229078		0.0297381	0.0712033	0.0583417		0.084	0.0284945		0.04543	0.0410841	0.0371444		0.084	0.011527		0.0190339	0.0402006	0.0343528
0.0842	0.0399369		0.0740889	0.0722338	0.0571698		0.0842	0.0229482		0.0297609	0.071336	0.0583441		0.0842	0.0285297		0.0454672	0.0412478	0.037181		0.0842	0.0115675		0.0190567	0.0403334	0.0343553
0.0844	0.0399894		0.0741492	0.0724473	0.0572328		0.0844	0.0230078		0.0298052	0.0713735	0.0583493		0.0844	0.0285821		0.0455275	0.0414613	0.0372439		0.0844	0.011627		0.019101	0.0403708	0.0343604
0.0846	0.040056		0.0742291	0.0726637	0.0572914		0.0846	0.0230663		0.0298322	0.0714483	0.0583983		0.0846	0.0286487		0.0456073	0.0416777	0.0373026		0.0846	0.0116856		0.019128	0.0404457	0.0344094
0.0848	0.0401316		0.0743257	0.072908	0.057345		0.0848	0.0231149		0.0298297	0.0714704	0.0585056		0.0848	0.0287244		0.0457039	0.0419221	0.0373561		0.0848	0.0117341		0.0191255	0.0404677	0.0345167
0.085	0.0401888		0.0743713	0.0732062	0.0574086		0.085	0.0231266		0.0298213	0.0714975	0.0586635		0.085	0.0287815		0.0457495	0.0422203	0.0374198		0.085	0.0117458		0.0191171	0.0404948	0.0346746
0.0852	0.040241		0.0743856	0.0734238	0.0574635		0.0852	0.0231721		0.0298397	0.0715082	0.0587956		0.0852	0.0288337		0.0457639	0.0424378	0.0374746		0.0852	0.0117914		0.0191355	0.0405055	0.0348067
0.0854	0.0402898		0.0744454	0.0735709	0.0574843		0.0854	0.0232302		0.0298445	0.0715246	0.0588792		0.0854	0.0288825		0.0458236	0.0425849	0.0374954		0.0854	0.0118494		0.0191403	0.040522	0.0348904
0.0856	0.0402997		0.0744888	0.0736608	0.0575284		0.0856	0.0233089		0.0298469	0.0715972	0.0589511		0.0856	0.0288925		0.0458671	0.0426748	0.0375396		0.0856	0.0119282		0.0191427	0.0405945	0.0349623
0.0858	0.0403116		0.0745288	0.0737157	0.0575952		0.0858	0.0233736		0.0298389	0.0716919	0.0589584		0.0858	0.0289043		0.045907	0.0427298	0.0376064		0.0858	0.0119929		0.0191347	0.0406893	0.0349696
0.086	0.0403498		0.0745782	0.0737733	0.0576623		0.086	0.023417		0.0298259	0.0718029	0.0589639		0.086	0.0289426		0.0459564	0.0427874	0.0376734		0.086	0.0120363		0.0191217	0.0408002	0.0349751
0.0862	0.0403949		0.0746785	0.0738615	0.0577181		0.0862	0.023437		0.0298435	0.0718613	0.0589998		0.0862	0.0289876		0.0460568	0.0428756	0.0377292		0.0862	0.0120562		0.0191393	0.0408586	0.035011
0.0864	0.040445		0.0747923	0.0740059	0.0578156		0.0864	0.0234854		0.0298511	0.0718896	0.0590307		0.0864	0.0290378		0.0461706	0.0430199	0.0378268		0.0864	0.0121047		0.0191469	0.040887	0.0350418
0.0866	0.0404878		0.0748655	0.0741583	0.0579659		0.0866	0.0235331		0.0298534	0.0718753	0.059109		0.0866	0.0290805		0.0462437	0.0431724	0.037977		0.0866	0.0121524		0.0191492	0.0408726	0.0351202
0.0868	0.0405136		0.0749442	0.0743057	0.0581069		0.0868	0.0235799		0.0298669	0.0718382	0.0592462		0.0868	0.0291063		0.0463225	0.0433198	0.0381181		0.0868	0.0121991		0.0191627	0.0408355	0.0352574
0.087	0.0405541		0.0749875	0.0744446	0.0582134		0.087	0.0236161		0.0298696	0.0717731	0.0593397		0.087	0.0291469		0.0463658	0.0434587	0.0382245		0.087	0.0122353		0.0191654	0.0407705	0.0353508
0.0872	0.0406107		0.0749714	0.0745689	0.0582569		0.0872	0.0236424		0.029902	0.0717169	0.0593921		0.0872	0.0292035		0.0463496	0.0435829	0.038268		0.0872	0.0122617		0.0191978	0.0407142	0.0354032
0.0874	0.0406483		0.0749077	0.0746652	0.0583066		0.0874	0.0236519		0.0299222	0.0716915	0.0594631		0.0874	0.0292411		0.0462859	0.0436793	0.0383177		0.0874	0.0122711		0.019218	0.0406888	0.0354742
0.0876	0.0406985		0.0748074	0.0747334	0.0583556		0.0876	0.0236849		0.0299638	0.0716984	0.0595137		0.0876	0.0292912		0.0461856	0.0437474	0.0383667		0.0876	0.0123042		0.0192596	0.0406957	0.0355249
0.0878	0.0407554		0.0747208	0.0747978	0.0584231		0.0878	0.0237333		0.0300641	0.0717171	0.0595444		0.0878	0.0293481		0.046099	0.0438118	0.0384342		0.0878	0.0123525		0.0193599	0.0407145	0.0355555
0.088	0.0407957		0.0746906	0.0748676	0.0584738		0.088	0.0237799		0.0301811	0.0717485	0.0595578		0.088	0.0293884		0.0460688	0.0438816	0.0384849		0.088	0.0123991		0.0194769	0.0407458	0.0355689
0.0882	0.0408457		0.074746	0.0749853	0.0585288		0.0882	0.0238134		0.0302851	0.0717962	0.0596058		0.0882	0.0294385		0.0461243	0.0439994	0.0385399		0.0882	0.0124326		0.0195809	0.0407935	0.035617
0.0884	0.0408858		0.0748002	0.0751055	0.0586097		0.0884	0.0238429		0.0303124	0.0718657	0.0596709		0.0884	0.0294786		0.0461784	0.0441196	0.0386209		0.0884	0.0124621		0.0196082	0.040863	0.035682
0.0886	0.0409039		0.0748161	0.075215	0.0586838		0.0886	0.0238641		0.0303346	0.0719321	0.0596872		0.0886	0.0294967		0.0461943	0.044229	0.0386949		0.0886	0.0124833		0.0196304	0.0409294	0.0356983
0.0888	0.0409144		0.0748349	0.0753071	0.0587231		0.0888	0.0238651		0.0304088	0.0719957	0.059669		0.0888	0.0295071		0.0462131	0.0443211	0.0387343		0.0888	0.0124843		0.0197046	0.040993	0.0356802
0.089	0.0409177		0.0748607	0.0753504	0.0587564		0.089	0.0238402		0.0305034	0.0720537	0.0596514		0.089	0.0295105		0.046239	0.0443644	0.0387676		0.089	0.0124594		0.0197992	0.0410511	0.0356625
0.0892	0.0409125		0.0748696	0.0754091	0.0587972		0.0892	0.023819		0.0306025	0.0721209	0.0596907		0.0892	0.0295052		0.0462478	0.0444231	0.0388083		0.0892	0.0124382		0.0198983	0.0411182	0.0357019
0.0894	0.040897		0.0748822	0.0755361	0.0588503		0.0894	0.0238268		0.030663	0.0721753	0.059765		0.0894	0.0294897		0.0462604	0.0445502	0.0388614		0.0894	0.012446		0.0199588	0.0411726	0.0357761
0.0896	0.0408834		0.0749467	0.0756188	0.058908		0.0896	0.0238483		0.0307092	0.0722156	0.0598387		0.0896	0.0294762		0.0463249	0.0446328	0.0389192		0.0896	0.0124675		0.020005	0.0412129	0.0358498
0.0898	0.0408829		0.0750436	0.0756473	0.0589925		0.0898	0.0238685		0.0307583	0.0721989	0.0599228		0.0898	0.0294756		0.0464218	0.0446614	0.0390037		0.0898	0.0124877		0.0200541	0.0411962	0.0359339
0.09	0.0409014		0.0751732	0.0756948	0.059102		0.09	0.0238833		0.0308162	0.0722106	0.0599975		0.09	0.0294941		0.0465514	0.0447089	0.0391131		0.09	0.0125025		0.020112	0.0412079	0.0360087
0.0902	0.0409509		0.0752963	0.0757679	0.0592132		0.0902	0.0238964		0.0308754	0.0722951	0.0600559		0.0902	0.0295436		0.0466745	0.0447819	0.0392243		0.0902	0.0125156		0.0201712	0.0412924	0.036067
0.0904	0.040991		0.0753824	0.0758277	0.0592922		0.0904	0.0239108		0.0309231	0.0723913	0.0600697		0.0904	0.0295838		0.0467606	0.0448417	0.0393033		0.0904	0.01253		0.0202189	0.0413887	0.0360809
0.0906	0.0410172		0.0755224	0.0759035	0.0594039		0.0906	0.023925		0.0309674	0.072502	0.0601027		0.0906	0.02961		0.0469006	0.0449175	0.0394151		0.0906	0.0125442		0.0202632	0.0414993	0.0361138
0.0908	0.0410232		0.0757135	0.0760067	0.0595266		0.0908	0.0239504		0.0309984	0.0726522	0.0601716		0.0908	0.0296159		0.0470917	0.0450208	0.0395378		0.0908	0.0125696		0.0202942	0.0416495	0.0361827
0.091	0.0410277		0.0759072	0.0760737	0.0596863		0.091	0.0239785		0.0310314	0.0728164	0.0602367		0.091	0.0296204		0.0472854	0.0450878	0.0396975		0.091	0.0125977		0.0203272	0.0418137	0.0362478
0.0912	0.0410133		0.0760772	0.0761423	0.0598655		0.0912	0.0240071		0.0310696	0.0729943	0.0603		0.0912	0.0296061		0.0474554	0.0451563	0.0398767		0.0912	0.0126264		0.0203655	0.0419916	0.0363111
0.0914	0.0409934		0.0761375	0.076229	0.0599787		0.0914	0.0240348		0.0311133	0.0731398	0.0603545		0.0914	0.0295861		0.0475158	0.0452431	0.0399898		0.0914	0.012654		0.0204091	0.0421371	0.0363656
0.0916	0.0409901		0.076194	0.076308	0.0600828		0.0916	0.0240526		0.0311842	0.0732258	0.0603863		0.0916	0.0295829		0.0475722	0.045322	0.0400939		0.0916	0.0126718		0.02048	0.0422231	0.0363975
0.0918	0.0409658		0.0763089	0.0763648	0.0602226		0.0918	0.0240593		0.0312459	0.0732936	0.0604178		0.0918	0.0295585		0.0476871	0.0453789	0.0402338		0.0918	0.0126785		0.0205417	0.042291	0.0364289
0.092	0.0409145		0.0764725	0.0764019	0.0603086		0.092	0.0240553		0.0312795	0.0733465	0.0604229		0.092	0.0295072		0.0478507	0.0454159	0.0403198		0.092	0.0126745		0.0205753	0.0423438	0.0364341
0.0922	0.0408552		0.0765942	0.0764589	0.0603712		0.0922	0.0240622		0.0313009	0.0733457	0.0603983		0.0922	0.029448		0.0479724	0.0454729	0.0403823		0.0922	0.0126815		0.0205967	0.0423431	0.0364094
0.0924	0.0408228		0.0766773	0.0765439	0.0604241		0.0924	0.0240836		0.0313179	0.073357	0.0604078		0.0924	0.0294155		0.0480555	0.0455579	0.0404353		0.0924	0.0127028		0.0206137	0.0423543	0.0364189
0.0926	0.040816		0.0767047	0.0766764	0.060444		0.0926	0.0241106		0.031353	0.0734216	0.0604449		0.0926	0.0294087		0.0480829	0.0456905	0.0404551		0.0926	0.0127298		0.0206488	0.0424189	0.036456
0.0928	0.0408348		0.0767538	0.0768462	0.0604627		0.0928	0.0241387		0.0314017	0.0735668	0.0604643		0.0928	0.0294276		0.048132	0.0458602	0.0404738		0.0928	0.0127579		0.0206975	0.0425641	0.0364755
0.093	0.0408718		0.0768446	0.0770109	0.0605026		0.093	0.0241708		0.0314358	0.0737516	0.0604858		0.093	0.0294646		0.0482228	0.046025	0.0405138		0.093	0.0127901		0.0207316	0.0427489	0.0364969
0.0932	0.0408687		0.0769553	0.0771385	0.0605839		0.0932	0.0241877		0.0314569	0.0738905	0.0604829		0.0932	0.0294615		0.0483335	0.0461525	0.040595		0.0932	0.0128069		0.0207527	0.0428878	0.036494
0.0934	0.0408201		0.077064	0.0772205	0.0606465		0.0934	0.0241988		0.0314692	0.0739654	0.0604572		0.0934	0.0294128		0.0484423	0.0462345	0.0406576		0.0934	0.012818		0.020765	0.0429627	0.0364684
0.0936	0.0407781		0.0772009	0.0773376	0.0606804		0.0936	0.0242122		0.0314698	0.0740163	0.0604122		0.0936	0.0293708		0.0485791	0.0463517	0.0406915		0.0936	0.0128314		0.0207656	0.0430136	0.0364233
0.0938	0.0407734		0.0772813	0.0774221	0.0606937		0.0938	0.0242272		0.0314789	0.0740352	0.060322		0.0938	0.0293661		0.0486595	0.0464362	0.0407048		0.0938	0.0128464		0.0207747	0.0430325	0.0363332
0.094	0.040782		0.0773586	0.0775271	0.0607317		0.094	0.0242336		0.0315112	0.0739952	0.0602566		0.094	0.0293748		0.0487369	0.0465411	0.0407429		0.094	0.0128528		0.020807	0.0429925	0.0362677
0.0942	0.0407929		0.0774103	0.0776517	0.0607685		0.0942	0.024254		0.0315797	0.0739696	0.0603087		0.0942	0.0293856		0.0487885	0.0466657	0.0407797		0.0942	0.0128732		0.0208755	0.0429669	0.0363198
0.0944	0.0408177		0.0774206	0.0777751	0.0607865		0.0944	0.0242811		0.031664	0.0740004	0.0604055		0.0944	0.0294104		0.0487989	0.0467891	0.0407976		0.0944	0.0129003		0.0209598	0.0429977	0.0364167
0.0946	0.0408625		0.0775028	0.0778681	0.0607812		0.0946	0.0243085		0.0317177	0.0740771	0.0604618		0.0946	0.0294552		0.0488811	0.0468822	0.0407923		0.0946	0.0129277		0.0210135	0.0430744	0.0364729
0.0948	0.0408928		0.0775924	0.0779214	0.0607977		0.0948	0.024321		0.0317375	0.0741908	0.0604866		0.0948	0.0294856		0.0489706	0.0469354	0.0408089		0.0948	0.0129402		0.0210333	0.0431881	0.0364978
0.095	0.0409003		0.07767	0.077949	0.060812		0.095	0.0243157		0.0317844	0.074266	0.0605045		0.095	0.029493		0.0490483	0.046963	0.0408231		0.095	0.012935		0.0210802	0.0432634	0.0365156
0.0952	0.04092		0.0776988	0.077983	0.0608866		0.0952	0.0242997		0.0318553	0.0743414	0.0604706		0.0952	0.0295128		0.049077	0.0469971	0.0408977		0.0952	0.012919		0.0211511	0.0433388	0.0364817
0.0954	0.040965		0.0776909	0.0780489	0.0610061		0.0954	0.0242773		0.03194	0.0744028	0.0604166		0.0954	0.0295578		0.0490691	0.047063	0.0410173		0.0954	0.0128965		0.0212358	0.0434001	0.0364277
0.0956	0.0410335		0.0776922	0.0781073	0.0611322		0.0956	0.0242826		0.0320278	0.0744745	0.0603905		0.0956	0.0296262		0.0490704	0.0471213	0.0411434		0.0956	0.0129018		0.0213236	0.0434719	0.0364016
0.0958	0.0411085		0.0777039	0.0781306	0.0612441		0.0958	0.0243		0.0321076	0.0745472	0.0604074		0.0958	0.0297012		0.0490821	0.0471446	0.0412553		0.0958	0.0129192		0.0214034	0.0435445	0.0364185
0.096	0.0411358		0.0777552	0.0781771	0.0613079		0.096	0.0243126		0.0321626	0.0745741	0.0604483		0.096	0.0297286		0.0491334	0.0471912	0.041319		0.096	0.0129318		0.0214584	0.0435714	0.0364595
0.0962	0.0411323		0.0778492	0.0782383	0.0613309		0.0962	0.0243171		0.0321875	0.0746467	0.0605345		0.0962	0.029725		0.0492274	0.0472523	0.041342		0.0962	0.0129363		0.0214833	0.043644	0.0365456
0.0964	0.0411361		0.0779418	0.078308	0.0613676		0.0964	0.0243056		0.0322042	0.0747909	0.0606189		0.0964	0.0297288		0.04932	0.047322	0.0413787		0.0964	0.0129249		0.0215	0.0437883	0.03663
0.0966	0.0411551		0.0779627	0.0784146	0.0614553		0.0966	0.0243288		0.0322422	0.0749888	0.0606867		0.0966	0.0297479		0.0493409	0.0474287	0.0414665		0.0966	0.012948		0.021538	0.0439861	0.0366978
0.0968	0.0412027		0.0779382	0.0784847	0.0615464		0.0968	0.0243932		0.0322569	0.0752347	0.0607541		0.0968	0.0297955		0.0493164	0.0474987	0.0415576		0.0968	0.0130125		0.0215527	0.0442321	0.0367653
0.097	0.0412492		0.0779585	0.0785604	0.061603		0.097	0.0244582		0.0322747	0.075423	0.0608083		0.097	0.0298419		0.0493368	0.0475744	0.0416141		0.097	0.0130774		0.0215705	0.0444203	0.0368194
0.0972	0.0412824		0.0779876	0.0786391	0.0616705		0.0972	0.0244922		0.0323018	0.0755344	0.0608416		0.0972	0.0298751		0.0493658	0.0476532	0.0416816		0.0972	0.0131114		0.0215976	0.0445318	0.0368527
0.0974	0.0413309		0.0780362	0.0787796	0.0617117		0.0974	0.0245028		0.0322999	0.0756167	0.0608252		0.0974	0.0299237		0.0494144	0.0477936	0.0417228		0.0974	0.013122		0.0215957	0.044614	0.0368363
0.0976	0.0414034		0.0780887	0.0789051	0.061745		0.0976	0.0245236		0.0322885	0.0756314	0.0607861		0.0976	0.0299961		0.0494669	0.0479191	0.0417562		0.0976	0.0131428		0.0215843	0.0446288	0.0367972
0.0978	0.0414819		0.078159	0.0790087	0.0617793		0.0978	0.0245615		0.0322787	0.0756211	0.060701		0.0978	0.0300747		0.0495372	0.0480228	0.0417904		0.0978	0.0131808		0.0215745	0.0446184	0.0367122
0.098	0.0415452		0.0782217	0.0790436	0.0618337		0.098	0.024602		0.0322818	0.0756026	0.0605954		0.098	0.030138		0.0496	0.0480577	0.0418449		0.098	0.0132212		0.0215776	0.0445999	0.0366066
0.0982	0.041577		0.0782403	0.0790515	0.0618757		0.0982	0.0246218		0.0322826	0.0756457	0.0605326		0.0982	0.0301697		0.0496185	0.0480655	0.0418868		0.0982	0.013241		0.0215784	0.0446431	0.0365437
0.0984	0.0415637		0.0782157	0.0790598	0.0618964		0.0984	0.02465		0.0322828	0.0757442	0.0604987		0.0984	0.0301564		0.0495939	0.0480738	0.0419076		0.0984	0.0132692		0.0215786	0.0447416	0.0365099
0.0986	0.0415294		0.0781717	0.0790866	0.0619004		0.0986	0.0246853		0.0322781	0.0759054	0.0604858		0.0986	0.0301222		0.0495499	0.0481007	0.0419116		0.0986	0.0133045		0.0215739	0.0449027	0.036497
0.0988	0.0414796		0.07815	0.0791222	0.0618947		0.0988	0.0247226		0.0323037	0.076095	0.0605898		0.0988	0.0300723		0.0495283	0.0481363	0.0419059		0.0988	0.0133418		0.0215995	0.0450924	0.0366009
0.099	0.0414564		0.0781453	0.0791271	0.0618698		0.099	0.0248101		0.0323208	0.0762464	0.0607274		0.099	0.0300491		0.0495235	0.0481411	0.0418809		0.099	0.0134293		0.0216166	0.0452438	0.0367386
0.0992	0.0414573		0.0781085	0.0791241	0.0618462		0.0992	0.0248899		0.0323323	0.0763403	0.0608789		0.0992	0.03005		0.0494868	0.0481381	0.0418574		0.0992	0.0135091		0.0216281	0.0453376	0.0368901
0.0994	0.0414746		0.078082	0.0791603	0.0618164		0.0994	0.0249535		0.0323485	0.0763771	0.0609883		0.0994	0.0300673		0.0494602	0.0481744	0.0418276		0.0994	0.0135728		0.0216443	0.0453744	0.0369994
0.0996	0.0414852		0.0780882	0.0791944	0.0617822		0.0996	0.0249983		0.0323722	0.0763275	0.0609963		0.0996	0.0300779		0.0494665	0.0482085	0.0417933		0.0996	0.0136175		0.021668	0.0453248	0.0370075
0.0998	0.0414759		0.0780677	0.0791887	0.0617088		0.0998	0.0250307		0.0323837	0.0762982	0.0608984		0.0998	0.0300686		0.0494459	0.0482028	0.04172		0.0998	0.0136499		0.0216795	0.0452956	0.0369095
0.1	0.0414521		0.0780084	0.0791659	0.0616664		0.1	0.0250396		0.032382	0.0763069	0.0607954		0.1	0.0300449		0.0493866	0.04818	0.0416775		0.1	0.0136588		0.0216778	0.0453042	0.0368065
0.1002	0.041444		0.0779216	0.0790876	0.0616664		0.1002	0.0250305		0.0323685	0.0763709	0.0607576		0.1002	0.0300368		0.0492999	0.0481016	0.0416776		0.1002	0.0136498		0.0216643	0.0453682	0.0367687
0.1004	0.0414701		0.0778583	0.078986	0.0616675		0.1004	0.0250306		0.0323716	0.0764252	0.060804		0.1004	0.0300628		0.0492365	0.048	0.0416786		0.1004	0.0136498		0.0216674	0.0454225	0.0368152
0.1006	0.0415144		0.0778722	0.0789408	0.0616912		0.1006	0.0250464		0.0324028	0.0764725	0.0609085		0.1006	0.0301071		0.0492504	0.0479548	0.0417024		0.1006	0.0136657		0.0216986	0.0454698	0.0369196
0.1008	0.0415608		0.0779414	0.0789525	0.0617158		0.1008	0.0250601		0.0324291	0.0764771	0.0610348		0.1008	0.0301535		0.0493196	0.0479666	0.0417269		0.1008	0.0136793		0.0217249	0.0454745	0.037046
0.101	0.0415923		0.0779528	0.0789975	0.0617289		0.101	0.0251199		0.0324148	0.0764148	0.0611128		0.101	0.030185		0.0493311	0.0480115	0.04174		0.101	0.0137392		0.0217106	0.0454121	0.037124
0.1012	0.041674		0.0779702	0.0790643	0.061722		0.1012	0.0251666		0.032378	0.0762947	0.061162		0.1012	0.0302668		0.0493484	0.0480784	0.0417331		0.1012	0.0137859		0.0216738	0.0452921	0.0371731
0.1014	0.0417737		0.0780199	0.079106	0.0616978		0.1014	0.0252025		0.0323499	0.0762527	0.0611892		0.1014	0.0303665		0.0493982	0.0481201	0.0417089		0.1014	0.0138217		0.0216457	0.04525	0.0372003
0.1016	0.0418851		0.078087	0.079164	0.0617086		0.1016	0.0252192		0.0323381	0.0763627	0.0612557		0.1016	0.0304778		0.0494652	0.0481781	0.0417197		0.1016	0.0138384		0.0216339	0.04536	0.0372669
0.1018	0.042003		0.0781663	0.0792503	0.061754		0.1018	0.0252278		0.0323768	0.0764776	0.0613589		0.1018	0.0305958		0.0495445	0.0482643	0.0417651		0.1018	0.013847		0.0216726	0.045475	0.03737
0.102	0.0421186		0.0782698	0.0793613	0.0618224		0.102	0.0252239		0.032423	0.0764912	0.0614441		0.102	0.0307114		0.049648	0.0483753	0.0418335		0.102	0.0138431		0.0217188	0.0454885	0.0374552
0.1022	0.0422032		0.0783887	0.0795302	0.0618579		0.1022	0.0252327		0.0324552	0.0764976	0.0614796		0.1022	0.0307959		0.0497669	0.0485443	0.041869		0.1022	0.0138519		0.021751	0.0454949	0.0374907
0.1024	0.0423234		0.0785167	0.0796775	0.0618131		0.1024	0.0252619		0.0324765	0.0765949	0.0614826		0.1024	0.0309161		0.0498949	0.0486915	0.0418243		0.1024	0.0138811		0.0217723	0.0455922	0.0374938
0.1026	0.0424634		0.0786352	0.0798022	0.0617288		0.1026	0.0252936		0.0324889	0.0767881	0.0614637		0.1026	0.0310561		0.0500134	0.0488163	0.04174		0.1026	0.0139128		0.0217847	0.0457854	0.0374748
0.1028	0.0426196		0.0787732	0.0799322	0.0616529		0.1028	0.0253086		0.0324905	0.0769895	0.0614104		0.1028	0.0312123		0.0501514	0.0489462	0.041664		0.1028	0.0139278		0.0217863	0.0459868	0.0374215
0.103	0.0427517		0.0788993	0.0800285	0.0616046		0.103	0.0253573		0.0324955	0.0771522	0.0613377		0.103	0.0313444		0.0502775	0.0490425	0.0416157		0.103	0.0139765		0.0217914	0.0461495	0.0373488
0.1032	0.0428225		0.0789982	0.0801003	0.0615635		0.1032	0.0254135		0.0325053	0.0773155	0.0613135		0.1032	0.0314152		0.0503764	0.0491143	0.0415747		0.1032	0.0140327		0.0218011	0.0463129	0.0373246
0.1034	0.0428746		0.0790606	0.0801499	0.0614961		0.1034	0.0254647		0.0325284	0.0774403	0.061337		0.1034	0.0314673		0.0504389	0.0491639	0.0415073		0.1034	0.0140839		0.0218242	0.0464376	0.0373481
0.1036	0.0429442		0.0790965	0.0801895	0.061409		0.1036	0.0255078		0.0325438	0.0775601	0.0614169		0.1036	0.0315369		0.0504747	0.0492035	0.0414201		0.1036	0.0141271		0.0218396	0.0465575	0.037428
0.1038	0.0430461		0.0792057	0.0802425	0.0613164		0.1038	0.0255197		0.0325561	0.0776647	0.0615688		0.1038	0.0316388		0.0505839	0.0492565	0.0413276		0.1038	0.0141389		0.0218519	0.046662	0.03758
0.104	0.0431603		0.0793959	0.0803492	0.0612348		0.104	0.0255361		0.0326053	0.0777101	0.0617519		0.104	0.0317531		0.0507742	0.0493632	0.0412459		0.104	0.0141554		0.0219011	0.0467075	0.037763
0.1042	0.0432907		0.079588	0.0804943	0.0611749		0.1042	0.0255651		0.0326719	0.0777993	0.0618906		0.1042	0.0318834		0.0509662	0.0495083	0.041186		0.1042	0.0141843		0.0219677	0.0467966	0.0379017
0.1044	0.0434127		0.0797311	0.080583	0.0611217		0.1044	0.0256118		0.0327404	0.0779545	0.0619948		0.1044	0.0320055		0.0511094	0.0495971	0.0411328		0.1044	0.0142311		0.0220362	0.0469519	0.0380059
0.1046	0.0435018		0.0797362	0.0806309	0.061111		0.1046	0.0256456		0.032829	0.0780802	0.0620317		0.1046	0.0320945		0.0511144	0.049645	0.0411221		0.1046	0.0142649		0.0221248	0.0470775	0.0380428
0.1048	0.0435739		0.0796999	0.080664	0.0611424		0.1048	0.025666		0.0328809	0.0781543	0.0620383		0.1048	0.0321667		0.0510782	0.0496781	0.0411535		0.1048	0.0142852		0.0221767	0.0471517	0.0380494
0.105	0.0436228		0.0796373	0.080668	0.0612395		0.105	0.0256748		0.0329398	0.0782155	0.0620193		0.105	0.0322155		0.0510155	0.049682	0.0412506		0.105	0.0142941		0.0222356	0.0472128	0.0380304
0.1052	0.0436519		0.0795687	0.0807013	0.0614021		0.1052	0.0256637		0.0330171	0.078197	0.0620452		0.1052	0.0322447		0.0509469	0.0497153	0.0414133		0.1052	0.0142829		0.0223129	0.0471943	0.0380563
0.1054	0.043683		0.0795486	0.0807782	0.0615541		0.1054	0.0256608		0.0331273	0.0780819	0.062127		0.1054	0.0322757		0.0509268	0.0497922	0.0415652		0.1054	0.01428		0.0224231	0.0470792	0.0381382
0.1056	0.0437292		0.0796028	0.0808733	0.0617047		0.1056	0.0256606		0.0332508	0.078041	0.0622039		0.1056	0.032322		0.050981	0.0498873	0.0417159		0.1056	0.0142799		0.0225466	0.0470384	0.038215
0.1058	0.0437806		0.0796409	0.0809758	0.0617987		0.1058	0.025665		0.0333672	0.0780792	0.0622578		0.1058	0.0323734		0.0510191	0.0499899	0.0418099		0.1058	0.0142843		0.022663	0.0470766	0.038269
0.106	0.0438281		0.0796981	0.0811065	0.0618192		0.106	0.0256531		0.0334679	0.0781053	0.0623098		0.106	0.0324208		0.0510763	0.0501205	0.0418304		0.106	0.0142724		0.0227637	0.0471026	0.0383209
0.1062	0.0438787		0.0797738	0.0812255	0.0618042		0.1062	0.025651		0.0335723	0.0781594	0.0623564		0.1062	0.0324714		0.051152	0.0502395	0.0418154		0.1062	0.0142703		0.0228681	0.0471568	0.0383676
0.1064	0.0439267		0.0798614	0.0813522	0.0618157		0.1064	0.0256436		0.0336986	0.0782553	0.0623114		0.1064	0.0325194		0.0512396	0.0503662	0.0418268		0.1064	0.0142628		0.0229944	0.0472527	0.0383225
0.1066	0.0439744		0.0799236	0.0814793	0.0618785		0.1066	0.0256453		0.0338383	0.0783929	0.0622584		0.1066	0.0325671		0.0513018	0.0504933	0.0418896		0.1066	0.0142645		0.0231341	0.0473902	0.0382695
0.1068	0.0440063		0.0800271	0.0816805	0.0620036		0.1068	0.0256676		0.0339642	0.0785678	0.0622529		0.1068	0.0325991		0.0514054	0.0506945	0.0420147		0.1068	0.0142868		0.02326	0.0475651	0.038264
0.107	0.044047		0.080151	0.0818321	0.062066		0.107	0.0256963		0.0340656	0.0787138	0.0622561		0.107	0.0326397		0.0515292	0.0508462	0.0420771		0.107	0.0143155		0.0233614	0.0477112	0.0382672
0.1072	0.0441149		0.080295	0.0819513	0.0621184		0.1072	0.0257238		0.0341549	0.0788297	0.0622485		0.1072	0.0327076		0.0516732	0.0509654	0.0421295		0.1072	0.014343		0.0234507	0.047827	0.0382597
0.1074	0.0441861		0.0804397	0.0821079	0.0621732		0.1074	0.0257195		0.0342466	0.0788906	0.0622288		0.1074	0.0327789		0.051818	0.0511219	0.0421843		0.1074	0.0143387		0.0235424	0.0478879	0.03824
0.1076	0.0442393		0.0805612	0.0822998	0.0623011		0.1076	0.025737		0.0343632	0.0789674	0.062182		0.1076	0.032832		0.0519395	0.0513139	0.0423122		0.1076	0.0143563		0.023659	0.0479647	0.0381931
0.1078	0.0442908		0.0806608	0.0824823	0.0624837		0.1078	0.0257668		0.0345014	0.0790288	0.062135		0.1078	0.0328836		0.052039	0.0514964	0.0424948		0.1078	0.014386		0.0237972	0.0480261	0.0381461
0.108	0.0443238		0.0807458	0.0826426	0.0626644		0.108	0.025814		0.0346225	0.079108	0.0620889		0.108	0.0329166		0.052124	0.0516567	0.0426755		0.108	0.0144333		0.0239183	0.0481054	0.0381
0.1082	0.0443537		0.080806	0.0827956	0.0628214		0.1082	0.02587		0.0347766	0.0792195	0.0620583		0.1082	0.0329465		0.0521842	0.0518096	0.0428326		0.1082	0.0144892		0.0240724	0.0482168	0.0380694
0.1084	0.0443881		0.0808324	0.0829387	0.0629998		0.1084	0.0259223		0.0349544	0.079342	0.0620825		0.1084	0.0329809		0.0522106	0.0519527	0.0430109		0.1084	0.0145415		0.0242502	0.0483394	0.0380936
0.1086	0.0444267		0.0808666	0.083041	0.0632057		0.1086	0.0259216		0.0351261	0.0794461	0.0621282		0.1086	0.0330194		0.0522448	0.0520551	0.0432168		0.1086	0.0145408		0.0244219	0.0484435	0.0381393
0.1088	0.0444833		0.0809122	0.0831451	0.0633387		0.1088	0.025871		0.0352951	0.079534	0.062169		0.1088	0.0330761		0.0522904	0.0521592	0.0433498		0.1088	0.0144903		0.0245909	0.0485313	0.0381801
0.109	0.0445211		0.0809501	0.0833086	0.0633959		0.109	0.0258193		0.0354618	0.0796989	0.0621594		0.109	0.0331138		0.0523284	0.0523227	0.0434071		0.109	0.0144385		0.0247576	0.0486962	0.0381705
0.1092	0.0445399		0.0809449	0.0835429	0.0634734		0.1092	0.0257855		0.0355779	0.0799177	0.0621726		0.1092	0.0331327		0.0523231	0.052557	0.0434845		0.1092	0.0144048		0.0248737	0.048915	0.0381837
0.1094	0.0445725		0.0809482	0.0837502	0.0636214		0.1094	0.0257661		0.0356661	0.0800858	0.062198		0.1094	0.0331653		0.0523264	0.0527643	0.0436325		0.1094	0.0143854		0.0249619	0.0490832	0.0382091
0.1096	0.044612		0.0810349	0.0838799	0.0637876		0.1096	0.0257727		0.0358239	0.0801834	0.0622557		0.1096	0.0332047		0.0524131	0.0528939	0.0437988		0.1096	0.014392		0.0251197	0.0491808	0.0382669
0.1098	0.0446508		0.0812	0.0839447	0.0639866		0.1098	0.0257684		0.0360612	0.0802805	0.0623562		0.1098	0.0332435		0.0525782	0.0529587	0.0439977		0.1098	0.0143876		0.025357	0.0492778	0.0383674
0.11	0.0446888		0.0813535	0.0839995	0.0641626		0.11	0.0257601		0.0363152	0.0803608	0.0624183		0.11	0.0332815		0.0527318	0.0530136	0.0441737		0.11	0.0143793		0.025611	0.0493581	0.0384294
0.1102	0.0447354		0.0815021	0.0840354	0.0642906		0.1102	0.0257561		0.0365083	0.0804313	0.0624288		0.1102	0.0333282		0.0528803	0.0530494	0.0443017		0.1102	0.0143753		0.0258041	0.0494287	0.0384399
0.1104	0.044784		0.0816284	0.0841083	0.0644038		0.1104	0.0257698		0.036633	0.0805214	0.0623567		0.1104	0.0333767		0.0530066	0.0531223	0.0444149		0.1104	0.014389		0.0259288	0.0495188	0.0383678
0.1106	0.0448365		0.0817375	0.0842556	0.0645144		0.1106	0.0257932		0.0367308	0.0805466	0.0622876		0.1106	0.0334292		0.0531157	0.0532697	0.0445255		0.1106	0.0144125		0.0260266	0.049544	0.0382988
0.1108	0.0448792		0.0818672	0.0843638	0.0645825		0.1108	0.0258123		0.0368557	0.0806256	0.0622304		0.1108	0.0334719		0.0532455	0.0533779	0.0445936		0.1108	0.0144315		0.0261515	0.049623	0.0382416
0.111	0.0448946		0.0819601	0.0844422	0.0646297		0.111	0.025826		0.03701	0.0806838	0.0622162		0.111	0.0334874		0.0533384	0.0534562	0.0446409		0.111	0.0144452		0.0263058	0.0496812	0.0382274
0.1112	0.044944		0.0820422	0.0845314	0.0646587		0.1112	0.0258325		0.0371847	0.0807336	0.0622489		0.1112	0.0335367		0.0534204	0.0535455	0.0446699		0.1112	0.0144517		0.0264805	0.049731	0.03826
0.1114	0.0450093		0.0820855	0.0846292	0.0647159		0.1114	0.0258238		0.0373303	0.0808098	0.0623134		0.1114	0.033602		0.0534637	0.0536433	0.0447271		0.1114	0.0144431		0.0266261	0.0498072	0.0383246
0.1116	0.0450821		0.0821089	0.0848004	0.0647892		0.1116	0.0258254		0.037404	0.0809199	0.06233		0.1116	0.0336748		0.0534871	0.0538144	0.0448003		0.1116	0.0144446		0.0266998	0.0499172	0.0383411
0.1118	0.045134		0.0821582	0.0849382	0.0648985		0.1118	0.0258282		0.0374236	0.0810502	0.0623172		0.1118	0.0337267		0.0535364	0.0539522	0.0449097		0.1118	0.0144474		0.0267194	0.0500476	0.0383283
0.112	0.0451733		0.0822406	0.085004	0.0650467		0.112	0.0258472		0.0374867	0.0811738	0.0622548		0.112	0.033766		0.0536189	0.0540181	0.0450578		0.112	0.0144664		0.0267825	0.0501712	0.0382659
0.1122	0.0452085		0.0823935	0.0850858	0.0652201		0.1122	0.0258792		0.0375836	0.0812557	0.0621481		0.1122	0.0338012		0.0537717	0.0540998	0.0452313		0.1122	0.0144985		0.0268794	0.0502531	0.0381592
0.1124	0.0452478		0.0825771	0.0850893	0.0653542		0.1124	0.0259184		0.0376901	0.0813641	0.0620528		0.1124	0.0338406		0.0539553	0.0541034	0.0453654		0.1124	0.0145377		0.0269859	0.0503614	0.0380639
0.1126	0.0452716		0.0827687	0.0850183	0.0654303		0.1126	0.0259575		0.0377755	0.0814533	0.0619774		0.1126	0.0338644		0.0541469	0.0540323	0.0454414		0.1126	0.0145767		0.0270713	0.0504507	0.0379885
0.1128	0.0452964		0.0829102	0.0849759	0.0654631		0.1128	0.0259906		0.0378297	0.0815763	0.0619332		0.1128	0.0338892		0.0542885	0.05399	0.0454742		0.1128	0.0146098		0.0271255	0.0505736	0.0379443
0.113	0.0453194		0.0829941	0.0849701	0.0654984		0.113	0.0260164		0.037895	0.0817079	0.0619065		0.113	0.0339121		0.0543723	0.0539841	0.0455095		0.113	0.0146356		0.0271908	0.0507052	0.0379176
0.1132	0.0453479		0.0830432	0.0849768	0.0655174		0.1132	0.0260384		0.0379974	0.0818319	0.0619148		0.1132	0.0339407		0.0544214	0.0539908	0.0455285		0.1132	0.0146577		0.0272932	0.0508292	0.0379259
0.1134	0.0453876		0.0830748	0.0850296	0.0655329		0.1134	0.026063		0.0381232	0.0818903	0.0619768		0.1134	0.0339803		0.054453	0.0540437	0.045544		0.1134	0.0146823		0.027419	0.0508876	0.0379879
0.1136	0.0454096		0.0831005	0.0851166	0.065529		0.1136	0.0260877		0.0382464	0.0819013	0.0621381		0.1136	0.0340023		0.0544787	0.0541306	0.0455401		0.1136	0.0147069		0.0275422	0.0508986	0.0381492
0.1138	0.0454111		0.0831746	0.0851987	0.065534		0.1138	0.0261116		0.0383481	0.0819256	0.0623418		0.1138	0.0340039		0.0545528	0.0542127	0.0455451		0.1138	0.0147309		0.0276439	0.0509229	0.0383529
0.114	0.045401		0.0832521	0.0852797	0.0655354		0.114	0.0261269		0.0383956	0.0819692	0.0625176		0.114	0.0339937		0.0546303	0.0542937	0.0455465		0.114	0.0147461		0.0276914	0.0509665	0.0385288
0.1142	0.0454249		0.0833594	0.0853305	0.0655411		0.1142	0.0261305		0.0383977	0.0820439	0.0626267		0.1142	0.0340177		0.0547377	0.0543446	0.0455522		0.1142	0.0147497		0.0276935	0.0510412	0.0386378
0.1144	0.0454601		0.0835005	0.0853906	0.065548		0.1144	0.0261169		0.0384163	0.0821391	0.0627108		0.1144	0.0340528		0.0548788	0.0544047	0.0455592		0.1144	0.0147361		0.0277121	0.0511365	0.0387219
0.1146	0.0454681		0.0836474	0.085481	0.0655459		0.1146	0.0261		0.0384477	0.0821763	0.0628399		0.1146	0.0340609		0.0550257	0.054495	0.0455571		0.1146	0.0147192		0.0277435	0.0511736	0.038851
0.1148	0.0454441		0.0837423	0.0855345	0.0655521		0.1148	0.0260755		0.0384695	0.0821638	0.0629769		0.1148	0.0340368		0.0551205	0.0545485	0.0455632		0.1148	0.0146947		0.0277653	0.0511611	0.0389881
0.115	0.045435		0.0838157	0.085514	0.0655524		0.115	0.0260645		0.0384979	0.0821331	0.0630941		0.115	0.0340278		0.0551939	0.054528	0.0455635		0.115	0.0146837		0.0277937	0.0511304	0.0391053
0.1152	0.0454348		0.0838936	0.0854569	0.0655426		0.1152	0.0260468		0.0385529	0.0821245	0.0632205		0.1152	0.0340275		0.0552719	0.054471	0.0455538		0.1152	0.014666		0.0278487	0.0511219	0.0392317
0.1154	0.0454363		0.0840066	0.0854141	0.0655358		0.1154	0.0260086		0.0386072	0.0821718	0.0633782		0.1154	0.034029		0.0553848	0.0544281	0.045547		0.1154	0.0146278		0.027903	0.0511691	0.0393894
0.1156	0.0454478		0.0841014	0.0853932	0.0655542		0.1156	0.0259601		0.0386314	0.0822239	0.0635499		0.1156	0.0340406		0.0554796	0.0544073	0.0455653		0.1156	0.0145794		0.0279272	0.0512212	0.039561
0.1158	0.0454908		0.0841778	0.0854135	0.0656348		0.1158	0.0259272		0.0385962	0.0823287	0.0636972		0.1158	0.0340835		0.055556	0.0544276	0.0456459		0.1158	0.0145464		0.027892	0.051326	0.0397084
0.116	0.0455333		0.0842708	0.0854866	0.0657555		0.116	0.0259528		0.0385695	0.082406	0.0637834		0.116	0.034126		0.055649	0.0545006	0.0457667		0.116	0.0145721		0.0278653	0.0514033	0.0397945
0.1162	0.0455467		0.0843736	0.0855836	0.0659031		0.1162	0.0260012		0.0385389	0.0824452	0.0638447		0.1162	0.0341395		0.0557519	0.0545977	0.0459143		0.1162	0.0146204		0.0278347	0.0514426	0.0398558
0.1164	0.0455359		0.0844754	0.0856799	0.0660348		0.1164	0.026049		0.0384702	0.0824524	0.0639037		0.1164	0.0341287		0.0558536	0.0546939	0.0460459		0.1164	0.0146682		0.027766	0.0514497	0.0399149
0.1166	0.0455299		0.0845875	0.085766	0.0661234		0.1166	0.0260862		0.0384353	0.0824809	0.0639293		0.1166	0.0341227		0.0559657	0.0547801	0.0461346		0.1166	0.0147055		0.0277311	0.0514783	0.0399404
0.1168	0.0455459		0.0846613	0.0858358	0.0661967		0.1168	0.02612		0.0384901	0.0825297	0.0639749		0.1168	0.0341387		0.0560396	0.0548498	0.0462078		0.1168	0.0147392		0.0277859	0.0515271	0.039986
0.117	0.0455521		0.0846846	0.0859319	0.0662746		0.117	0.0261356		0.0385801	0.082609	0.0640798		0.117	0.0341448		0.0560628	0.054946	0.0462858		0.117	0.0147548		0.0278759	0.0516063	0.0400909
0.1172	0.045558		0.0847479	0.0860382	0.0663952		0.1172	0.0261213		0.0386403	0.0827399	0.0641461		0.1172	0.0341507		0.0561262	0.0550523	0.0464064		0.1172	0.0147405		0.0279361	0.0517372	0.0401573
0.1174	0.0455665		0.0848103	0.0861454	0.0664797		0.1174	0.0261164		0.0386679	0.082881	0.06421		0.1174	0.0341592		0.0561885	0.0551595	0.0464909		0.1174	0.0147356		0.0279637	0.0518783	0.0402211
0.1176	0.0455874		0.0849048	0.0862065	0.0665415		0.1176	0.0261213		0.0386919	0.0829678	0.0642428		0.1176	0.0341801		0.056283	0.0552205	0.0465527		0.1176	0.0147405		0.0279877	0.0519652	0.0402539
0.1178	0.0456284		0.0850192	0.0862701	0.0666062		0.1178	0.0261556		0.0387573	0.0830426	0.0642401		0.1178	0.0342211		0.0563974	0.0552841	0.0466173		0.1178	0.0147748		0.0280531	0.05204	0.0402513
0.118	0.0456752		0.0850655	0.0863671	0.0666454		0.118	0.0261755		0.038802	0.0831024	0.0642101		0.118	0.0342679		0.0564437	0.0553812	0.0466565		0.118	0.0147947		0.0280978	0.0520997	0.0402213
0.1182	0.0456982		0.085081	0.0864903	0.0666591		0.1182	0.026173		0.0388075	0.083162	0.0641585		0.1182	0.034291		0.0564592	0.0555043	0.0466702		0.1182	0.0147922		0.0281033	0.0521593	0.0401696
0.1184	0.0456995		0.0851149	0.0866769	0.0666806		0.1184	0.0261759		0.0387884	0.0833079	0.0640575		0.1184	0.0342922		0.0564931	0.0556909	0.0466917		0.1184	0.0147951		0.0280842	0.0523052	0.0400686
0.1186	0.0457053		0.0852082	0.0869061	0.0666912		0.1186	0.0261815		0.0387376	0.0834676	0.0640089		0.1186	0.034298		0.0565864	0.0559201	0.0467023		0.1186	0.0148008		0.0280334	0.0524649	0.04002
0.1188	0.0457086		0.0853174	0.0871103	0.0666592		0.1188	0.0261922		0.0386873	0.0836003	0.0639711		0.1188	0.0343013		0.0566956	0.0561244	0.0466703		0.1188	0.0148114		0.0279831	0.0525976	0.0399822
0.119	0.0456985		0.0853862	0.0872408	0.066643		0.119	0.026193		0.0386526	0.083686	0.0639567		0.119	0.0342913		0.0567644	0.0562549	0.0466541		0.119	0.0148122		0.0279484	0.0526833	0.0399679
0.1192	0.0457087		0.0854484	0.0873263	0.0666724		0.1192	0.0261656		0.0386512	0.0837373	0.0639831		0.1192	0.0343014		0.0568266	0.0563404	0.0466836		0.1192	0.0147848		0.027947	0.0527346	0.0399942
0.1194	0.0457602		0.0854543	0.0874176	0.0667143		0.1194	0.0261523		0.038688	0.0838326	0.0640235		0.1194	0.0343529		0.0568325	0.0564316	0.0467255		0.1194	0.0147715		0.0279838	0.05283	0.0400347
0.1196	0.0458406		0.0854839	0.0875063	0.0667597		0.1196	0.0261743		0.0387696	0.0838819	0.0640143		0.1196	0.0344334		0.0568621	0.0565204	0.0467708		0.1196	0.0147935		0.0280654	0.0528793	0.0400255
0.1198	0.0459302		0.0855262	0.0876143	0.0667745		0.1198	0.0262236		0.0388507	0.0839249	0.0639691		0.1198	0.034523		0.0569044	0.0566284	0.0467856		0.1198	0.0148429		0.0281465	0.0529223	0.0399803
0.12	0.0459903		0.0856091	0.0876851	0.0667839		0.12	0.0262912		0.0389348	0.0839871	0.0639057		0.12	0.034583		0.0569873	0.0566992	0.046795		0.12	0.0149104		0.0282306	0.0529845	0.0399169
0.1202	0.0460163		0.0857401	0.0878197	0.0668014		0.1202	0.0263183		0.039005	0.0840479	0.0638758		0.1202	0.0346091		0.0571183	0.0568338	0.0468125		0.1202	0.0149375		0.0283008	0.0530452	0.039887
0.1204	0.0460295		0.0858135	0.0879652	0.0668635		0.1204	0.0263852		0.0390373	0.0840681	0.0638726		0.1204	0.0346222		0.0571917	0.0569792	0.0468746		0.1204	0.0150045		0.0283331	0.0530655	0.0398837
0.1206	0.0460437		0.0858139	0.0880572	0.066959		0.1206	0.0264925		0.039014	0.0840846	0.0638706		0.1206	0.0346365		0.0571921	0.0570712	0.0469701		0.1206	0.0151117		0.0283098	0.0530819	0.0398817
0.1208	0.0460809		0.0857909	0.0881351	0.0670704		0.1208	0.0266533		0.0390093	0.0840438	0.0638637		0.1208	0.0346736		0.0571691	0.0571492	0.0470815		0.1208	0.0152726		0.0283051	0.0530412	0.0398748
0.121	0.0461267		0.0857557	0.0882205	0.0671506		0.121	0.0268133		0.0390485	0.0840973	0.0638526		0.121	0.0347194		0.057134	0.0572346	0.0471617		0.121	0.0154325		0.0283443	0.0530947	0.0398637
0.1212	0.0461662		0.0858083	0.088365	0.067178		0.1212	0.0269463		0.0391313	0.0842024	0.0638941		0.1212	0.0347589		0.0571865	0.057379	0.0471892		0.1212	0.0155655		0.0284271	0.0531997	0.0399052
0.1214	0.0461916		0.0859288	0.0885087	0.0671754		0.1214	0.0270246		0.0392412	0.0843268	0.0639308		0.1214	0.0347843		0.057307	0.0575228	0.0471866		0.1214	0.0156438		0.028537	0.0533242	0.0399419
0.1216	0.0462003		0.0860662	0.0886643	0.0671677		0.1216	0.0270364		0.0393469	0.0844179	0.0639606		0.1216	0.034793		0.0574445	0.0576783	0.0471789		0.1216	0.0156556		0.0286427	0.0534152	0.0399717
0.1218	0.0461936		0.0861838	0.0887482	0.067242		0.1218	0.0270646		0.0394352	0.084543	0.0639485		0.1218	0.0347863		0.057562	0.0577622	0.0472532		0.1218	0.0156839		0.028731	0.0535403	0.0399596
0.122	0.0461958		0.0862516	0.0887823	0.0673236		0.122	0.0271341		0.0395203	0.0846704	0.0639103		0.122	0.0347885		0.0576298	0.0577964	0.0473348		0.122	0.0157533		0.0288161	0.0536677	0.0399215
0.1222	0.0462378		0.0863194	0.0888453	0.0673647		0.1222	0.0272391		0.0395843	0.0847355	0.063846		0.1222	0.0348305		0.0576976	0.0578594	0.0473758		0.1222	0.0158584		0.0288801	0.0537328	0.0398571
0.1224	0.0463		0.0863779	0.08894	0.0673912		0.1224	0.0273461		0.0396203	0.0847391	0.0638178		0.1224	0.0348927		0.0577561	0.0579541	0.0474024		0.1224	0.0159653		0.0289161	0.0537365	0.039829
0.1226	0.0463682		0.0864042	0.0889809	0.0673438		0.1226	0.0274333		0.0396436	0.0847569	0.0638169		0.1226	0.034961		0.0577825	0.0579949	0.0473549		0.1226	0.0160525		0.0289394	0.0537543	0.039828
0.1228	0.0464		0.0864233	0.0889482	0.067236		0.1228	0.0274828		0.0396812	0.0847889	0.0638628		0.1228	0.0349927		0.0578015	0.0579622	0.0472472		0.1228	0.016102		0.028977	0.0537862	0.0398739
0.123	0.0464143		0.0864895	0.0889065	0.0671774		0.123	0.0274825		0.0397562	0.0848195	0.0639105		0.123	0.035007		0.0578677	0.0579206	0.0471885		0.123	0.0161018		0.029052	0.0538169	0.0399216
0.1232	0.0464137		0.0865147	0.0889106	0.067171		0.1232	0.0274705		0.0398489	0.0848641	0.063941		0.1232	0.0350065		0.0578929	0.0579246	0.0471822		0.1232	0.0160898		0.0291447	0.0538615	0.0399521
0.1234	0.0464346		0.0865024	0.0889587	0.0671675		0.1234	0.0274666		0.0399266	0.084883	0.0640025		0.1234	0.0350274		0.0578806	0.0579727	0.0471786		0.1234	0.0160858		0.0292224	0.0538803	0.0400136
0.1236	0.0464826		0.0864829	0.0890529	0.067128		0.1236	0.0274972		0.0400297	0.0848654	0.0640633		0.1236	0.0350753		0.0578611	0.0580669	0.0471392		0.1236	0.0161165		0.0293255	0.0538628	0.0400744
0.1238	0.0465539		0.0865052	0.0890973	0.0670525		0.1238	0.0275235		0.0401872	0.0848581	0.0640804		0.1238	0.0351466		0.0578834	0.0581113	0.0470636		0.1238	0.0161428		0.029483	0.0538554	0.0400915
0.124	0.0466344		0.0866059	0.0891101	0.0669978		0.124	0.0275842		0.0403419	0.0848855	0.0641874		0.124	0.0352272		0.0579841	0.0581241	0.0470089		0.124	0.0162034		0.0296377	0.0538829	0.0401985
0.1242	0.0467216		0.0867494	0.089062	0.0669173		0.1242	0.0276833		0.040456	0.0849189	0.0643116		0.1242	0.0353144		0.0581276	0.058076	0.0469285		0.1242	0.0163025		0.0297518	0.0539163	0.0403227
0.1244	0.0467817		0.0868684	0.0890341	0.0668069		0.1244	0.0278042		0.040516	0.0849697	0.0643861		0.1244	0.0353745		0.0582466	0.0580482	0.0468181		0.1244	0.0164235		0.0298118	0.0539671	0.0403972
0.1246	0.0468286		0.086905	0.0890036	0.0667064		0.1246	0.0279305		0.0405525	0.0850736	0.0643969		0.1246	0.0354214		0.0582832	0.0580176	0.0467175		0.1246	0.0165497		0.0298483	0.054071	0.040408
0.1248	0.0468944		0.086917	0.0890142	0.0666504		0.1248	0.0280228		0.0406382	0.0852426	0.0644467		0.1248	0.0354871		0.0582952	0.0580283	0.0466615		0.1248	0.016642		0.029934	0.0542399	0.0404579
0.125	0.0469707		0.0869839	0.0890378	0.0666086		0.125	0.0280521		0.0407297	0.085387	0.0644999		0.125	0.0355634		0.0583622	0.0580519	0.0466198		0.125	0.0166714		0.0300255	0.0543843	0.040511
0.1252	0.0470679		0.0870826	0.0891134	0.0665843		0.1252	0.0280379		0.0408508	0.0855497	0.064497		0.1252	0.0356606		0.0584608	0.0581275	0.0465955		0.1252	0.0166572		0.0301466	0.054547	0.0405082
0.1254	0.0471994		0.0872009	0.0891968	0.0665353		0.1254	0.028023		0.0409986	0.0857248	0.0644646		0.1254	0.0357921		0.0585791	0.0582108	0.0465465		0.1254	0.0166422		0.0302944	0.0547221	0.0404757
0.1256	0.0473434		0.0873102	0.0892168	0.0665206		0.1256	0.0280406		0.0411438	0.0859276	0.0644455		0.1256	0.0359361		0.0586884	0.0582308	0.0465317		0.1256	0.0166598		0.0304396	0.054925	0.0404566
0.1258	0.0474939		0.0873796	0.0891972	0.0665177		0.1258	0.0280727		0.0412393	0.0860759	0.0644617		0.1258	0.0360867		0.0587578	0.0582112	0.0465288		0.1258	0.016692		0.0305351	0.0550733	0.0404728
0.126	0.0476237		0.0874506	0.0891559	0.0664986		0.126	0.0281087		0.0412552	0.0861612	0.0644951		0.126	0.0362164		0.0588288	0.0581699	0.0465097		0.126	0.0167279		0.030551	0.0551586	0.0405063
0.1262	0.0477212		0.0875537	0.0891093	0.0664629		0.1262	0.0281492		0.041275	0.0862481	0.0645275		0.1262	0.036314		0.0589319	0.0581233	0.046474		0.1262	0.0167685		0.0305708	0.0552455	0.0405386
0.1264	0.0477956		0.0876241	0.0890659	0.0664021		0.1264	0.0281903		0.0413789	0.0862849	0.0645386		0.1264	0.0363884		0.0590023	0.0580799	0.0464132		0.1264	0.0168096		0.0306747	0.0552822	0.0405498
0.1266	0.0478364		0.0876378	0.0890552	0.0663131		0.1266	0.0282197		0.0415285	0.0862994	0.0645914		0.1266	0.0364291		0.059016	0.0580693	0.0463243		0.1266	0.016839		0.0308243	0.0552967	0.0406026
0.1268	0.0478559		0.0876403	0.0890855	0.0662742		0.1268	0.0282281		0.0416735	0.0863659	0.0647007		0.1268	0.0364487		0.0590185	0.0580995	0.0462854		0.1268	0.0168473		0.0309693	0.0553632	0.0407118
0.127	0.0478589		0.0876661	0.0891607	0.0662713		0.127	0.0282462		0.0418094	0.0865477	0.0648066		0.127	0.0364516		0.0590443	0.0581747	0.0462824		0.127	0.0168654		0.0311053	0.055545	0.0408177
0.1272	0.0478643		0.0877041	0.0892603	0.0662572		0.1272	0.0282797		0.0419101	0.0867243	0.0648704		0.1272	0.0364571		0.0590823	0.0582744	0.0462683		0.1272	0.0168989		0.0312059	0.0557216	0.0408815
0.1274	0.0478707		0.0877106	0.0894146	0.0662556		0.1274	0.0283152		0.0419516	0.0868601	0.0648762		0.1274	0.0364634		0.0590889	0.0584287	0.0462667		0.1274	0.0169345		0.0312474	0.0558574	0.0408874
0.1276	0.047895		0.0876599	0.0894576	0.0662762		0.1276	0.0283363		0.0420107	0.0869951	0.0648637		0.1276	0.0364877		0.0590381	0.0584716	0.0462874		0.1276	0.0169555		0.0313065	0.0559924	0.0408748
0.1278	0.0479375		0.0876206	0.0894759	0.0663229		0.1278	0.0283587		0.0420505	0.0870704	0.0648473		0.1278	0.0365303		0.0589988	0.05849	0.046334		0.1278	0.016978		0.0313463	0.0560677	0.0408584
0.128	0.0479818		0.0875757	0.0895325	0.0663783		0.128	0.0283618		0.0421253	0.0871075	0.0648213		0.128	0.0365745		0.058954	0.0585466	0.0463894		0.128	0.016981		0.0314211	0.0561049	0.0408324
0.1282	0.0480175		0.0875066	0.0895997	0.0664066		0.1282	0.0283682		0.0422211	0.0872044	0.0648014		0.1282	0.0366103		0.0588849	0.0586138	0.0464178		0.1282	0.0169874		0.031517	0.0562017	0.0408125
0.1284	0.0480284		0.0874436	0.0896347	0.0663893		0.1284	0.0283589		0.0423306	0.0873151	0.0647403		0.1284	0.0366212		0.0588219	0.0586488	0.0464004		0.1284	0.0169782		0.0316264	0.0563125	0.0407515
0.1286	0.0480198		0.0874211	0.0896587	0.0663547		0.1286	0.0283726		0.0424296	0.0873455	0.064666		0.1286	0.0366125		0.0587993	0.0586727	0.0463658		0.1286	0.0169918		0.0317254	0.0563428	0.0406771
0.1288	0.0480134		0.0873808	0.0896654	0.0663279		0.1288	0.0283802		0.0424788	0.0873376	0.0646252		0.1288	0.0366062		0.058759	0.0586794	0.046339		0.1288	0.0169994		0.0317746	0.0563349	0.0406363
0.129	0.0480053		0.0873174	0.0896751	0.0663502		0.129	0.0283764		0.0424505	0.0873378	0.0646072		0.129	0.036598		0.0586957	0.0586892	0.0463614		0.129	0.0169957		0.0317463	0.0563351	0.0406184
0.1292	0.0480054		0.0872155	0.0896985	0.0664058		0.1292	0.0283467		0.0424589	0.0874243	0.064585		0.1292	0.0365982		0.0585937	0.0587125	0.0464169		0.1292	0.016966		0.0317547	0.0564217	0.0405962
0.1294	0.0479972		0.0871557	0.0896813	0.0664919		0.1294	0.0283121		0.0425134	0.0875468	0.0645519		0.1294	0.03659		0.0585339	0.0586954	0.046503		0.1294	0.0169314		0.0318092	0.0565441	0.040563
0.1296	0.0479827		0.0871695	0.0896558	0.0666079		0.1296	0.0282688		0.042585	0.0876743	0.0644857		0.1296	0.0365755		0.0585477	0.0586699	0.0466191		0.1296	0.0168881		0.0318808	0.0566716	0.0404968
0.1298	0.047965		0.087232	0.0896425	0.0667175		0.1298	0.0282455		0.0426372	0.0877411	0.0644008		0.1298	0.0365577		0.0586102	0.0586565	0.0467286		0.1298	0.0168647		0.031933	0.0567384	0.0404119
0.13	0.0479505		0.0873567	0.0896485	0.0667876		0.13	0.0282743		0.0426359	0.0877086	0.0643296		0.13	0.0365433		0.0587349	0.0586625	0.0467988		0.13	0.0168936		0.0319317	0.0567059	0.0403407
0.1302	0.0479428		0.0875143	0.0897526	0.066778		0.1302	0.0283243		0.0426512	0.0876142	0.0642829		0.1302	0.0365355		0.0588925	0.0587667	0.0467891		0.1302	0.0169435		0.031947	0.0566116	0.040294
0.1304	0.047944		0.0876872	0.0898435	0.0667198		0.1304	0.028346		0.0427063	0.0875151	0.0642503		0.1304	0.0365367		0.0590654	0.0588575	0.046731		0.1304	0.0169652		0.0320021	0.0565125	0.0402614
0.1306	0.0479477		0.0877616	0.0898783	0.0667306		0.1306	0.0283614		0.0427958	0.0874038	0.0641787		0.1306	0.0365405		0.0591398	0.0588923	0.0467417		0.1306	0.0169806		0.0320916	0.0564011	0.0401898
0.1308	0.047956		0.0877078	0.0899072	0.0667603		0.1308	0.0283568		0.0429062	0.087372	0.0641465		0.1308	0.0365487		0.0590861	0.0589212	0.0467714		0.1308	0.016976		0.032202	0.0563693	0.0401576
0.131	0.0479742		0.0876531	0.0900075	0.06676		0.131	0.0283617		0.0429816	0.0874274	0.0641508		0.131	0.0365669		0.0590314	0.0590216	0.0467711		0.131	0.0169809		0.0322774	0.0564247	0.040162
0.1312	0.0479937		0.0876178	0.0900959	0.0667458		0.1312	0.0283825		0.0430136	0.0875785	0.0641318		0.1312	0.0365864		0.058996	0.05911	0.046757		0.1312	0.0170018		0.0323094	0.0565758	0.0401429
0.1314	0.0480018		0.0876674	0.0901548	0.0667733		0.1314	0.0284095		0.0430218	0.0877468	0.0640889		0.1314	0.0365945		0.0590456	0.0591689	0.0467844		0.1314	0.0170288		0.0323176	0.0567441	0.0401001
0.1316	0.0480354		0.0877309	0.0902081	0.0668103		0.1316	0.0284244		0.0430487	0.0878839	0.0640629		0.1316	0.0366281		0.0591091	0.0592221	0.0468214		0.1316	0.0170436		0.0323445	0.0568813	0.040074
0.1318	0.0481001		0.0877354	0.0902914	0.0669049		0.1318	0.0284329		0.043114	0.0879553	0.0640626		0.1318	0.0366928		0.0591137	0.0593054	0.046916		0.1318	0.0170522		0.0324098	0.0569526	0.0400737
0.132	0.0481639		0.0876979	0.0903179	0.0670015		0.132	0.0284247		0.0432012	0.0879217	0.0640905		0.132	0.0367567		0.0590761	0.0593319	0.0470126		0.132	0.0170439		0.032497	0.0569191	0.0401016
0.1322	0.0482153		0.0876641	0.0903077	0.0670703		0.1322	0.0284267		0.0433131	0.0878442	0.0640838		0.1322	0.0368081		0.0590424	0.0593217	0.0470814		0.1322	0.0170459		0.0326089	0.0568416	0.040095
0.1324	0.0482468		0.0877406	0.0903264	0.0671067		0.1324	0.0284279		0.0434599	0.0878017	0.0640171		0.1324	0.0368396		0.0591188	0.0593404	0.0471178		0.1324	0.0170471		0.0327557	0.0567991	0.0400282
0.1326	0.0482431		0.0878295	0.0904226	0.0671502		0.1326	0.0284266		0.0435963	0.0878763	0.0639555		0.1326	0.0368358		0.0592077	0.0594366	0.0471614		0.1326	0.0170458		0.0328921	0.0568736	0.0399666
0.1328	0.0482275		0.0878693	0.0905588	0.067139		0.1328	0.0284161		0.0436821	0.0879984	0.0639205		0.1328	0.0368202		0.0592476	0.0595728	0.0471501		0.1328	0.0170353		0.0329779	0.0569957	0.0399316
0.133	0.0482307		0.0878666	0.0906649	0.0671114		0.133	0.0283963		0.0437154	0.0881146	0.0639237		0.133	0.0368234		0.0592448	0.0596789	0.0471225		0.133	0.0170155		0.0330112	0.057112	0.0399348
0.1332	0.0482249		0.08783	0.0907727	0.0670913		0.1332	0.0283742		0.043829	0.0882079	0.0639666		0.1332	0.0368177		0.0592083	0.0597867	0.0471024		0.1332	0.0169934		0.0331248	0.0572053	0.0399778
0.1334	0.0482345		0.0877559	0.0908581	0.0670825		0.1334	0.0283469		0.0439765	0.0883284	0.0639687		0.1334	0.0368272		0.0591341	0.0598722	0.0470937		0.1334	0.0169661		0.0332723	0.0573257	0.0399798
0.1336	0.0482683		0.0877519	0.0909463	0.0671408		0.1336	0.0283261		0.0441218	0.0884791	0.0639724		0.1336	0.0368611		0.0591301	0.0599603	0.0471519		0.1336	0.0169453		0.0334176	0.0574765	0.0399836
0.1338	0.048312		0.087785	0.0910307	0.0671979		0.1338	0.0283198		0.0442441	0.088591	0.0639553		0.1338	0.0369047		0.0591632	0.0600448	0.0472091		0.1338	0.016939		0.0335399	0.0575883	0.0399664
0.134	0.0483689		0.0878389	0.0911311	0.0672269		0.134	0.028329		0.0443605	0.0886617	0.0639566		0.134	0.0369616		0.0592171	0.0601452	0.047238		0.134	0.0169482		0.0336563	0.0576591	0.0399677
0.1342	0.0484056		0.0878811	0.0912286	0.0672336		0.1342	0.0283519		0.0445044	0.0886871	0.0639547		0.1342	0.0369983		0.0592593	0.0602426	0.0472448		0.1342	0.0169711		0.0338002	0.0576845	0.0399658
0.1344	0.0484028		0.0878903	0.0913367	0.0672574		0.1344	0.0283964		0.044634	0.0886715	0.0639739		0.1344	0.0369955		0.0592686	0.0603507	0.0472685		0.1344	0.0170156		0.0339298	0.0576688	0.039985
0.1346	0.048396		0.0878964	0.0914812	0.0672954		0.1346	0.0284534		0.04476	0.0886611	0.064008		0.1346	0.0369887		0.0592746	0.0604952	0.0473066		0.1346	0.0170726		0.0340558	0.0576585	0.0400192
0.1348	0.0483737		0.0878821	0.0916096	0.0673265		0.1348	0.0285168		0.0448904	0.0886901	0.0640579		0.1348	0.0369665		0.0592603	0.0606236	0.0473376		0.1348	0.0171361		0.0341862	0.0576875	0.0400691
0.135	0.0483743		0.0878641	0.0917024	0.0673473		0.135	0.0285745		0.0449999	0.088759	0.0641751		0.135	0.036967		0.0592423	0.0607164	0.0473584		0.135	0.0171937		0.0342957	0.0577563	0.0401863
0.1352	0.0484064		0.0878663	0.0917445	0.0673817		0.1352	0.0286045		0.045081	0.0888721	0.0643224		0.1352	0.0369991		0.0592445	0.0607585	0.0473928		0.1352	0.0172237		0.0343768	0.0578694	0.0403335
0.1354	0.0484584		0.0878194	0.0917591	0.0674214		0.1354	0.0286099		0.0451642	0.0890294	0.0644152		0.1354	0.0370511		0.0591976	0.0607731	0.0474325		0.1354	0.0172291		0.03446	0.0580268	0.0404263
0.1356	0.0485108		0.0877307	0.0918549	0.0675089		0.1356	0.028641		0.0452336	0.0891955	0.0644504		0.1356	0.0371036		0.0591089	0.0608689	0.04752		0.1356	0.0172602		0.0345294	0.0581928	0.0404615
0.1358	0.0485407		0.0876494	0.0919652	0.0676206		0.1358	0.0286852		0.0452896	0.0892999	0.0644178		0.1358	0.0371334		0.0590276	0.0609793	0.0476317		0.1358	0.0173044		0.0345854	0.0582972	0.040429
0.136	0.0485574		0.0876146	0.0920614	0.0676943		0.136	0.0287407		0.0453397	0.0893337	0.064374		0.136	0.0371501		0.0589928	0.0610754	0.0477054		0.136	0.0173599		0.0346355	0.0583311	0.0403851
0.1362	0.0485749		0.0876293	0.0922092	0.0677505		0.1362	0.0287972		0.0453687	0.089364	0.0643095		0.1362	0.0371677		0.0590075	0.0612232	0.0477616		0.1362	0.0174165		0.0346645	0.0583613	0.0403207
0.1364	0.0486267		0.0876512	0.0923689	0.0677606		0.1364	0.0288404		0.0453976	0.0894204	0.0643082		0.1364	0.0372194		0.0590294	0.0613829	0.0477717		0.1364	0.0174597		0.0346934	0.0584177	0.0403193
0.1366	0.04871		0.0876119	0.092493	0.0677297		0.1366	0.0288608		0.045444	0.0894885	0.0643825		0.1366	0.0373027		0.0589901	0.061507	0.0477409		0.1366	0.0174801		0.0347398	0.0584858	0.0403936
0.1368	0.04875		0.0875547	0.0925793	0.0676371		0.1368	0.028857		0.045484	0.0895956	0.0644412		0.1368	0.0373427		0.058933	0.0615933	0.0476482		0.1368	0.0174762		0.0347798	0.0585929	0.0404523
0.137	0.0487462		0.0875144	0.0925859	0.0675603		0.137	0.0288444		0.0455652	0.0897133	0.0644541		0.137	0.037339		0.0588926	0.0615999	0.0475715		0.137	0.0174636		0.034861	0.0587106	0.0404652
0.1372	0.0487301		0.0874952	0.0925186	0.0675087		0.1372	0.0288408		0.0456605	0.0897952	0.0644552		0.1372	0.0373228		0.0588734	0.0615326	0.0475198		0.1372	0.01746		0.0349563	0.0587925	0.0404664
0.1374	0.0487268		0.0874943	0.0924578	0.0674807		0.1374	0.0288499		0.0457463	0.089883	0.0644353		0.1374	0.0373195		0.0588725	0.0614719	0.0474918		0.1374	0.0174692		0.0350421	0.0588804	0.0404465
0.1376	0.0487583		0.0874909	0.0924352	0.0674681		0.1376	0.0288703		0.0458355	0.0899602	0.0644405		0.1376	0.0373511		0.0588691	0.0614493	0.0474793		0.1376	0.0174895		0.0351313	0.0589575	0.0404516
0.1378	0.0488108		0.087469	0.0924777	0.0675034		0.1378	0.0288879		0.0459095	0.0900297	0.0644785		0.1378	0.0374036		0.0588472	0.0614918	0.0475146		0.1378	0.0175071		0.0352053	0.059027	0.0404897
0.138	0.0488618		0.0874554	0.0926599	0.0675221		0.138	0.0289037		0.0459467	0.0900844	0.0645365		0.138	0.0374545		0.0588336	0.0616739	0.0475333		0.138	0.0175229		0.0352425	0.0590817	0.0405476
0.1382	0.0488941		0.0875124	0.0928822	0.0675882		0.1382	0.0289188		0.0459536	0.0901528	0.0646081		0.1382	0.0374869		0.0588907	0.0618963	0.0475994		0.1382	0.017538		0.0352494	0.0591502	0.0406192
0.1384	0.0489017		0.0875728	0.0930564	0.0676748		0.1384	0.0289174		0.045973	0.0902281	0.0646534		0.1384	0.0374945		0.058951	0.0620704	0.0476859		0.1384	0.0175366		0.0352688	0.0592254	0.0406646
0.1386	0.0488844		0.0876358	0.0931585	0.0677794		0.1386	0.0289175		0.0460199	0.0902841	0.0647068		0.1386	0.0374772		0.059014	0.0621725	0.0477906		0.1386	0.0175367		0.0353157	0.0592815	0.0407179
0.1388	0.0488909		0.0876815	0.0932058	0.0678563		0.1388	0.0289405		0.046081	0.0903383	0.0647206		0.1388	0.0374837		0.0590597	0.0622199	0.0478674		0.1388	0.0175597		0.0353768	0.0593356	0.0407317
0.139	0.0489285		0.0877321	0.0932931	0.067918		0.139	0.0289794		0.0461469	0.0903622	0.0647071		0.139	0.0375212		0.0591103	0.0623072	0.0479291		0.139	0.0175987		0.0354427	0.0593595	0.0407182
0.1392	0.0489354		0.0877906	0.0934541	0.0679155		0.1392	0.029023		0.0462145	0.0903619	0.064718		0.1392	0.0375281		0.0591689	0.0624681	0.0479266		0.1392	0.0176423		0.0355103	0.0593592	0.0407292
0.1394	0.0489387		0.0878604	0.0936459	0.067881		0.1394	0.0290503		0.0462621	0.0903908	0.0647976		0.1394	0.0375314		0.0592386	0.0626599	0.0478921		0.1394	0.0176696		0.0355579	0.0593881	0.0408088
0.1396	0.0489608		0.0879208	0.0937876	0.0678621		0.1396	0.0290755		0.0462787	0.0904255	0.0649569		0.1396	0.0375535		0.059299	0.0628016	0.0478732		0.1396	0.0176947		0.0355745	0.0594228	0.0409681
0.1398	0.0489934		0.0879347	0.0938902	0.0678775		0.1398	0.02912		0.0462732	0.0904746	0.0651084		0.1398	0.0375861		0.059313	0.0629043	0.0478887		0.1398	0.0177392		0.035569	0.0594719	0.0411195
0.14	0.049027		0.0879307	0.0939503	0.0679027		0.14	0.0292073		0.0462763	0.0905286	0.0652284		0.14	0.0376197		0.0593089	0.0629644	0.0479138		0.14	0.0178265		0.0355721	0.0595259	0.0412396
0.1402	0.0490555		0.0879233	0.0939721	0.0678957		0.1402	0.0292804		0.0462999	0.0906167	0.0653371		0.1402	0.0376482		0.0593016	0.0629862	0.0479068		0.1402	0.0178996		0.0355957	0.059614	0.0413482
0.1404	0.0491084		0.0879615	0.0939752	0.0679186		0.1404	0.02933		0.0463342	0.0907905	0.0653965		0.1404	0.0377012		0.0593397	0.0629892	0.0479297		0.1404	0.0179493		0.03563	0.0597878	0.0414076
0.1406	0.0491594		0.088049	0.0940007	0.0679512		0.1406	0.0293527		0.0463617	0.0910269	0.065427		0.1406	0.0377522		0.0594272	0.0630147	0.0479624		0.1406	0.0179719		0.0356575	0.0600243	0.0414382
0.1408	0.0491997		0.0880901	0.0940455	0.0679962		0.1408	0.029402		0.0463883	0.0912415	0.065401		0.1408	0.0377924		0.0594683	0.0630596	0.0480073		0.1408	0.0180213		0.0356841	0.0602388	0.0414121
0.141	0.0492313		0.0880777	0.09417	0.0680393		0.141	0.029462		0.0463798	0.0914419	0.0653788		0.141	0.037824		0.059456	0.063184	0.0480504		0.141	0.0180812		0.0356756	0.0604392	0.04139
0.1412	0.0492526		0.0880844	0.094313	0.0680389		0.1412	0.0295483		0.0463659	0.0915384	0.0653616		0.1412	0.0378454		0.0594626	0.063327	0.04805		0.1412	0.0181675		0.0356617	0.0605357	0.0413728
0.1414	0.0492903		0.0881431	0.0944481	0.0679714		0.1414	0.0296261		0.0463333	0.091568	0.0653223		0.1414	0.0378831		0.0595213	0.0634621	0.0479825		0.1414	0.0182453		0.0356291	0.0605654	0.0413334
0.1416	0.0493078		0.0882262	0.0945626	0.0679044		0.1416	0.0296758		0.0463165	0.0916258	0.0652693		0.1416	0.0379005		0.0596044	0.0635766	0.0479155		0.1416	0.018295		0.0356123	0.0606231	0.0412804
0.1418	0.049294		0.0882373	0.0946345	0.0678732		0.1418	0.029748		0.0463052	0.0917224	0.0652506		0.1418	0.0378868		0.0596155	0.0636485	0.0478844		0.1418	0.0183672		0.035601	0.0607197	0.0412617
0.142	0.0492861		0.0881894	0.0946978	0.0678576		0.142	0.0298396		0.0462866	0.0918308	0.0652414		0.142	0.0378788		0.0595676	0.0637119	0.0478688		0.142	0.0184588		0.0355824	0.0608281	0.0412526
0.1422	0.0493006		0.0880986	0.0947745	0.0678525		0.1422	0.0299364		0.0462576	0.0919513	0.0652203		0.1422	0.0378933		0.0594768	0.0637886	0.0478637		0.1422	0.0185557		0.0355534	0.0609486	0.0412315
0.1424	0.0493434		0.0880259	0.0948676	0.0678934		0.1424	0.0300325		0.0462416	0.0921246	0.0651411		0.1424	0.0379362		0.0594042	0.0638817	0.0479045		0.1424	0.0186517		0.0355374	0.0611219	0.0411522
0.1426	0.0494165		0.0880294	0.0949592	0.0679612		0.1426	0.0301068		0.0462092	0.0921957	0.0650442		0.1426	0.0380092		0.0594076	0.0639732	0.0479723		0.1426	0.018726		0.035505	0.061193	0.0410553
0.1428	0.0494774		0.0880343	0.0950258	0.0680206		0.1428	0.0301262		0.0461508	0.0922145	0.0649851		0.1428	0.0380702		0.0594125	0.0640399	0.0480317		0.1428	0.0187454		0.0354466	0.0612118	0.0409962
0.143	0.0494952		0.0880471	0.0950625	0.0680331		0.143	0.0301503		0.046111	0.0921992	0.0650009		0.143	0.038088		0.0594253	0.0640765	0.0480442		0.143	0.0187695		0.0354068	0.0611966	0.041012
0.1432	0.0494683		0.0879928	0.0950919	0.0680108		0.1432	0.0302199		0.0461268	0.0921484	0.0650015		0.1432	0.038061		0.059371	0.064106	0.0480219		0.1432	0.0188391		0.0354226	0.0611457	0.0410126
0.1434	0.0494389		0.0878911	0.095157	0.0679937		0.1434	0.0303114		0.0461703	0.0919634	0.064989		0.1434	0.0380316		0.0592693	0.0641711	0.0480048		0.1434	0.0189306		0.0354661	0.0609608	0.0410001
0.1436	0.0494309		0.0877831	0.0952567	0.0680039		0.1436	0.0304211		0.0462219	0.091787	0.0649732		0.1436	0.0380236		0.0591613	0.0642708	0.048015		0.1436	0.0190403		0.0355177	0.0607844	0.0409844
0.1438	0.0494394		0.0877352	0.0953558	0.0680097		0.1438	0.030517		0.0462557	0.0917403	0.0648983		0.1438	0.0380321		0.0591134	0.0643698	0.0480208		0.1438	0.0191362		0.0355515	0.0607376	0.0409095
0.144	0.0494448		0.0876449	0.0953165	0.0680122		0.144	0.0305605		0.0462865	0.0917377	0.0648427		0.144	0.0380375		0.0590231	0.0643305	0.0480234		0.144	0.0191797		0.0355823	0.060735	0.0408539
0.1442	0.0494445		0.0875515	0.0952311	0.0680048		0.1442	0.0305714		0.0463259	0.0916373	0.0648515		0.1442	0.0380373		0.0589297	0.0642451	0.0480159		0.1442	0.0191906		0.0356217	0.0606346	0.0408626
0.1444	0.0494296		0.0874958	0.0951748	0.0679782		0.1444	0.0306025		0.0463979	0.091499	0.0648521		0.1444	0.0380223		0.0588741	0.0641889	0.0479893		0.1444	0.0192217		0.0356937	0.0604963	0.0408632
0.1446	0.0494138		0.0874945	0.0951929	0.0679488		0.1446	0.030637		0.0464327	0.0913557	0.0648452		0.1446	0.0380066		0.0588727	0.064207	0.04796		0.1446	0.0192562		0.0357285	0.060353	0.0408563
0.1448	0.0494376		0.087533	0.0952699	0.0679416		0.1448	0.0306949		0.0464518	0.0912341	0.0648221		0.1448	0.0380303		0.0589112	0.0642839	0.0479528		0.1448	0.0193141		0.0357476	0.0602314	0.0408333
0.145	0.0494949		0.0875739	0.0954107	0.0679514		0.145	0.0307436		0.0464724	0.0910874	0.0647977		0.145	0.0380877		0.0589521	0.0644247	0.0479626		0.145	0.0193629		0.0357682	0.0600847	0.0408089
0.1452	0.0495274		0.0876072	0.0955755	0.0679077		0.1452	0.0307615		0.0464947	0.0909695	0.0647953		0.1452	0.0381202		0.0589854	0.0645895	0.0479188		0.1452	0.0193807		0.0357905	0.0599669	0.0408065
0.1454	0.0495361		0.0876215	0.0957628	0.0678634		0.1454	0.0307777		0.0465468	0.0908726	0.0648123		0.1454	0.0381289		0.0589997	0.0647768	0.0478745		0.1454	0.0193969		0.0358426	0.0598699	0.0408234
0.1456	0.0495325		0.0876246	0.0958611	0.0678654		0.1456	0.0308195		0.0466498	0.0908552	0.0648469		0.1456	0.0381252		0.0590028	0.0648751	0.0478765		0.1456	0.0194387		0.0359456	0.0598525	0.0408581
0.1458	0.0495465		0.0875994	0.0959048	0.0678889		0.1458	0.0308683		0.0468113	0.0908462	0.0648644		0.1458	0.0381392		0.0589777	0.0649188	0.0479001		0.1458	0.0194875		0.0361071	0.0598435	0.0408756
0.146	0.0495863		0.0876087	0.0959237	0.0679814		0.146	0.0309257		0.046996	0.0908723	0.0648258		0.146	0.038179		0.0589869	0.0649377	0.0479925		0.146	0.0195449		0.0362918	0.0598696	0.0408369
0.1462	0.0496327		0.0876432	0.0958762	0.0681149		0.1462	0.030985		0.0471311	0.0908522	0.0647541		0.1462	0.0382254		0.0590214	0.0648903	0.0481261		0.1462	0.0196042		0.0364269	0.0598496	0.0407652
0.1464	0.0496641		0.0876424	0.0958303	0.0681965		0.1464	0.0310526		0.0472586	0.0907646	0.0646843		0.1464	0.0382568		0.0590206	0.0648444	0.0482076		0.1464	0.0196719		0.0365544	0.059762	0.0406955
0.1466	0.0496825		0.0876704	0.0958385	0.0682436		0.1466	0.0311289		0.0473712	0.0906956	0.0646318		0.1466	0.0382753		0.0590486	0.0648526	0.0482547		0.1466	0.0197482		0.036667	0.0596929	0.040643
0.1468	0.0496907		0.0877441	0.0958723	0.0682535		0.1468	0.0312008		0.0474497	0.0906627	0.0645894		0.1468	0.0382834		0.0591224	0.0648864	0.0482647		0.1468	0.0198201		0.0367455	0.0596601	0.0406005
0.147	0.0496858		0.0878532	0.0959091	0.0683179		0.147	0.0312855		0.047546	0.0905703	0.0646064		0.147	0.0382786		0.0592314	0.0649231	0.048329		0.147	0.0199047		0.0368418	0.0595676	0.0406175
0.1472	0.0496646		0.088005	0.0959663	0.0684394		0.1472	0.0313616		0.0476704	0.0903556	0.0646362		0.1472	0.0382573		0.0593832	0.0649804	0.0484506		0.1472	0.0199808		0.0369662	0.0593529	0.0406474
0.1474	0.0496541		0.088179	0.0960105	0.0686116		0.1474	0.0314402		0.0478066	0.0902336	0.0645878		0.1474	0.0382469		0.0595573	0.0650246	0.0486228		0.1474	0.0200595		0.0371024	0.0592309	0.0405989
0.1476	0.04966		0.0882827	0.095972	0.0688187		0.1476	0.0315164		0.0479167	0.0902075	0.0645386		0.1476	0.0382527		0.0596609	0.064986	0.0488298		0.1476	0.0201357		0.0372125	0.0592048	0.0405497
0.1478	0.0496785		0.0883388	0.0959216	0.0690325		0.1478	0.0315542		0.0479915	0.090251	0.0644947		0.1478	0.0382713		0.0597171	0.0649356	0.0490436		0.1478	0.0201735		0.0372873	0.0592484	0.0405059
0.148	0.0497175		0.0884366	0.0959428	0.0692767		0.148	0.0315905		0.048121	0.0903136	0.0644996		0.148	0.0383103		0.0598149	0.0649568	0.0492878		0.148	0.0202097		0.0374168	0.0593109	0.0405107
0.1482	0.0497646		0.088577	0.0959938	0.069472		0.1482	0.0316204		0.0482962	0.0903797	0.0644765		0.1482	0.0383573		0.0599553	0.0650079	0.0494831		0.1482	0.0202396		0.037592	0.059377	0.0404876
0.1484	0.0498095		0.0887418	0.0960284	0.0696042		0.1484	0.0316304		0.0484559	0.0904072	0.0644371		0.1484	0.0384023		0.06012	0.0650424	0.0496154		0.1484	0.0202496		0.0377517	0.0594045	0.0404482
0.1486	0.0498429		0.0888867	0.0960869	0.0696865		0.1486	0.0316256		0.048529	0.0904194	0.0643726		0.1486	0.0384357		0.0602649	0.0651009	0.0496977		0.1486	0.0202448		0.0378248	0.0594167	0.0403838
0.1488	0.0498561		0.0889642	0.0962013	0.0696909		0.1488	0.0316241		0.0486146	0.0904618	0.0643363		0.1488	0.0384489		0.0603424	0.0652153	0.049702		0.1488	0.0202434		0.0379104	0.0594592	0.0403474
0.149	0.0498598		0.0889926	0.0963023	0.069665		0.149	0.0316384		0.0487459	0.0905586	0.0643043		0.149	0.0384525		0.0603709	0.0653163	0.0496762		0.149	0.0202576		0.0380417	0.0595559	0.0403154
0.1492	0.04986		0.089089	0.0962939	0.0696389		0.1492	0.0316811		0.0488419	0.0907533	0.0642597		0.1492	0.0384527		0.0604673	0.065308	0.04965		0.1492	0.0203003		0.0381377	0.0597507	0.0402708
0.1494	0.0498856		0.0892506	0.0963129	0.0696244		0.1494	0.0317096		0.0488861	0.0909811	0.0642723		0.1494	0.0384783		0.0606288	0.065327	0.0496355		0.1494	0.0203288		0.0381819	0.0599784	0.0402834
0.1496	0.0499425		0.0894142	0.0963431	0.069621		0.1496	0.0317154		0.0488749	0.0912482	0.0643364		0.1496	0.0385353		0.0607924	0.0653571	0.0496321		0.1496	0.0203346		0.0381707	0.0602455	0.0403476
0.1498	0.0499966		0.0895636	0.0964101	0.0696107		0.1498	0.0317174		0.0489277	0.0915088	0.0644292		0.1498	0.0385894		0.0609418	0.0654242	0.0496218		0.1498	0.0203366		0.0382235	0.0605061	0.0404404

## Sheet: ETA-MP ket-med
DATA preBotC to 7n							DATA preBotC to 7n							DATA preBotC to 7n							DATA preBotC to 7n								MP amplitude peak					Statistics
MP-baseline							MP-laser on							MP-baseline							MP-laser on									MP baseline	MP laser ON
Time	20210716A	20210716B	20210716C	202140914A	20210914B		Time	20210716A	20210716B	20210716C	202140914A	20210914B		Time	20210716A	20210716B	20210716C	202140914A	20210914B		Time	20210716A	20210716B	20210716C	202140914A	20210914B			rat 20210716A	1.42e-07	0.000154249			Column B	laser ON
-0.15	0.0110223		0.0107183	0.011312	0.0117711		-0.15	0.0108374	had apnea	0.0111045	0.0111988	0.0117568		-0.15	0		0	0	0		-0.15	0	had apnea	0	0	0			rat 20210716B					vs.	vs.
-0.1498	0.0110225		0.0107138	0.0113082	0.0117508		-0.1498	0.0108372		0.0111063	0.0112048	0.0117521		-0.1498	1.42e-07		-4.498e-06	-3.888e-06	-2.0216e-05		-0.1498	-2.29e-07		1.748e-06	6.063e-06	-4.781e-06			rat 20210716C	0.000217337	3.4413e-05			Column A	baseline
-0.1496	0.0110164		0.0107151	0.011307	0.0117443		-0.1496	0.0108418		0.0111103	0.0111978	0.0117448		-0.1496	-5.934e-06		-3.104e-06	-5.073e-06	-2.6803e-05		-0.1496	4.428e-06		5.722e-06	-9.91e-07	-1.2044e-05			rat 20210914A	0.000173239	1.1621e-05
-0.1494	0.0110129		0.0107099	0.0113069	0.0117436		-0.1494	0.0108423		0.0111105	0.0111929	0.0117334		-0.1494	-9.443e-06		-8.327e-06	-5.173e-06	-2.7413e-05		-0.1494	4.869e-06		5.975e-06	-5.82e-06	-2.3446e-05			rat 20210914B	0.000503872	0.00023495			Paired t test
-0.1492	0.0110118		0.0107093	0.0113122	0.0117388		-0.1492	0.0108417		0.0111076	0.0111899	0.0117418		-0.1492	-1.0561e-05		-8.915e-06	1.8e-07	-3.2303e-05		-0.1492	4.261e-06		3.111e-06	-8.881e-06	-1.5022e-05								P value	0.3031
-0.149	0.0110138		0.0107056	0.0113174	0.0117307		-0.149	0.0108443		0.0111103	0.0111921	0.0117396		-0.149	-8.522e-06		-1.2676e-05	5.392e-06	-4.0381e-05		-0.149	6.942e-06		5.775e-06	-6.626e-06	-1.7199e-05								P value summary	ns
-0.1488	0.0110138		0.010696	0.0113171	0.0117456		-0.1488	0.0108497		0.0111169	0.0111877	0.0117362		-0.1488	-8.561e-06		-2.2243e-05	5.084e-06	-2.5483e-05		-0.1488	1.2289e-05		1.2342e-05	-1.1077e-05	-2.0686e-05			Mean	0.0002236	0.0001088			Significantly different (P < 0.05)?	No
-0.1486	0.0110155		0.0106984	0.011322	0.0117376		-0.1486	0.0108467		0.0111114	0.0111892	0.0117432		-0.1486	-6.799e-06		-1.9867e-05	9.911e-06	-3.35e-05		-0.1486	9.276e-06		6.817e-06	-9.553e-06	-1.3677e-05			Std. Deviation	0.000209	0.0001048			One- or two-tailed P value?	Two-tailed
-0.1484	0.01101		0.0107009	0.0113156	0.0117307		-0.1484	0.0108479		0.0111103	0.0111833	0.0117378		-0.1484	-1.237e-05		-1.7392e-05	3.555e-06	-4.0312e-05		-0.1484	1.0532e-05		5.803e-06	-1.5426e-05	-1.9007e-05			Std. Error of Mean	0.0001045	5.241e-05			t, df	t=1.240, df=3
-0.1482	0.0110149		0.0107031	0.0113102	0.0117262		-0.1482	0.010845		0.0111008	0.0111806	0.011733		-0.1482	-7.468e-06		-1.5194e-05	-1.864e-06	-4.4872e-05		-0.1482	7.56e-06		-3.693e-06	-1.8196e-05	-2.3831e-05								Number of pairs	4
-0.148	0.0110093		0.0106989	0.0113059	0.0117174		-0.148	0.0108516		0.0111033	0.0111841	0.0117411		-0.148	-1.3075e-05		-1.9351e-05	-6.137e-06	-5.3639e-05		-0.148	1.4184e-05		-1.257e-06	-1.4622e-05	-1.5727e-05			Lower 95% CI of mean	-0.0001089	-5.797e-05
-0.1478	0.0110052		0.0106981	0.0113012	0.0117055		-0.1478	0.0108451		0.0111152	0.0111829	0.011747		-0.1478	-1.7162e-05		-2.0198e-05	-1.0872e-05	-6.5583e-05		-0.1478	7.69e-06		1.0643e-05	-1.5846e-05	-9.8e-06			Upper 95% CI of mean	0.0005562	0.0002756			How big is the difference?
-0.1476	0.011003		0.0107071	0.0113042	0.0117029		-0.1476	0.0108486		0.0111207	0.0111821	0.0117479		-0.1476	-1.9355e-05		-1.1126e-05	-7.837e-06	-6.8186e-05		-0.1476	1.1226e-05		1.6184e-05	-1.6666e-05	-8.962e-06								Mean of differences (B - A)	-0.0001148
-0.1474	0.0110015		0.0107003	0.0113024	0.0116982		-0.1474	0.010849		0.0111338	0.0111886	0.0117425		-0.1474	-2.0834e-05		-1.7983e-05	-9.602e-06	-7.2851e-05		-0.1474	1.1638e-05		2.9267e-05	-1.0164e-05	-1.4342e-05			Minimum	1.42e-07	1.162e-05			SD of differences	0.0001852
-0.1472	0.0110025		0.0107017	0.011302	0.0117026		-0.1472	0.0108541		0.0111245	0.0111892	0.0117457		-0.1472	-1.9806e-05		-1.6504e-05	-1.0055e-05	-6.8448e-05		-0.1472	1.6738e-05		1.9967e-05	-9.553e-06	-1.1183e-05			Maximum	0.0005039	0.000235			SEM of differences	9.26e-05
-0.147	0.0109963		0.0107038	0.0113001	0.0117039		-0.147	0.0108512		0.011121	0.0111859	0.0117529		-0.147	-2.6042e-05		-1.4466e-05	-1.1981e-05	-6.7181e-05		-0.147	1.3783e-05		1.6511e-05	-1.2881e-05	-3.923e-06			Range	0.0005037	0.0002233			95% confidence interval	-0.0004095 to 0.0001799
-0.1468	0.0110015		0.0106982	0.0112991	0.0116939		-0.1468	0.0108506		0.0111193	0.0111862	0.0117493		-0.1468	-2.0878e-05		-2.0005e-05	-1.2974e-05	-7.7118e-05		-0.1468	1.3207e-05		1.475e-05	-1.2541e-05	-7.519e-06								R squared (partial eta squared)	0.3389
-0.1466	0.0110004		0.0106933	0.0113052	0.0116898		-0.1466	0.0108472		0.0111048	0.0111869	0.0117616		-0.1466	-2.1921e-05		-2.4903e-05	-6.803e-06	-8.1245e-05		-0.1466	9.78e-06		2.48e-07	-1.1819e-05	4.711e-06
-0.1464	0.011		0.0106914	0.0113036	0.0116861		-0.1464	0.0108473		0.0110999	0.0111819	0.0117591		-0.1464	-2.2382e-05		-2.6809e-05	-8.455e-06	-8.4907e-05		-0.1464	9.886e-06		-4.665e-06	-1.6855e-05	2.282e-06								Normality of Residuals
-0.1462	0.0110043		0.0106909	0.0113027	0.011688		-0.1462	0.0108434		0.0110997	0.0111845	0.0117702		-0.1462	-1.8017e-05		-2.7364e-05	-9.324e-06	-8.3041e-05		-0.1462	5.948e-06		-4.842e-06	-1.4287e-05	1.3367e-05								Test name	Statistics	P value	Passed normality test (alpha=0.05)?	P value summary
-0.146	0.0110045		0.0106906	0.0113006	0.011694		-0.146	0.0108339		0.0110886	0.0111823	0.0117674		-0.146	-1.7805e-05		-2.7613e-05	-1.1484e-05	-7.7101e-05		-0.146	-3.499e-06		-1.5944e-05	-1.649e-05	1.0556e-05
-0.1458	0.0110053		0.0106936	0.0113059	0.0116934		-0.1458	0.0108343		0.011088	0.0111825	0.0117709		-0.1458	-1.7042e-05		-2.4674e-05	-6.129e-06	-7.7648e-05		-0.1458	-3.148e-06		-1.654e-05	-1.6278e-05	1.4025e-05								Shapiro-Wilk (W)	0.8416	0.2001	Yes	ns
-0.1456	0.0110013		0.010694	0.0113033	0.0116872		-0.1456	0.0108327		0.0110859	0.0111719	0.011772		-0.1456	-2.1048e-05		-2.4278e-05	-8.787e-06	-8.3855e-05		-0.1456	-4.74e-06		-1.8651e-05	-2.687e-05	1.5139e-05								Kolmogorov-Smirnov (distance)	N too small	0.1	Yes	ns
-0.1454	0.0109972		0.0107012	0.0113061	0.011687		-0.1454	0.0108341		0.0110859	0.0111746	0.0117795		-0.1454	-2.5137e-05		-1.7005e-05	-5.915e-06	-8.4038e-05		-0.1454	-3.35e-06		-1.8682e-05	-2.4161e-05	2.2699e-05
-0.1452	0.0109994		0.0107039	0.0113056	0.0116849		-0.1452	0.0108323		0.0110919	0.0111644	0.0117665		-0.1452	-2.2938e-05		-1.4342e-05	-6.488e-06	-8.6173e-05		-0.1452	-5.109e-06		-1.2616e-05	-3.4312e-05	9.66e-06
-0.145	0.0109925		0.0107015	0.0113089	0.0116875		-0.145	0.0108347		0.011097	0.0111592	0.0117734		-0.145	-2.9856e-05		-1.6782e-05	-3.19e-06	-8.3602e-05		-0.145	-2.7e-06		-7.526e-06	-3.9577e-05	1.6554e-05
-0.1448	0.0109927		0.0106968	0.0113039	0.0116967		-0.1448	0.0108316		0.0110966	0.0111686	0.0117663		-0.1448	-2.9687e-05		-2.1498e-05	-8.175e-06	-7.4322e-05		-0.1448	-5.779e-06		-7.949e-06	-3.0152e-05	9.502e-06
-0.1446	0.0109874		0.0107008	0.0113073	0.0117029		-0.1446	0.0108331		0.0110949	0.0111658	0.0117616		-0.1446	-3.4904e-05		-1.7441e-05	-4.704e-06	-6.8122e-05		-0.1446	-4.315e-06		-9.647e-06	-3.2971e-05	4.73e-06
-0.1444	0.0109917		0.0107018	0.0113029	0.0116949		-0.1444	0.0108381		0.011111	0.0111588	0.0117517		-0.1444	-3.0639e-05		-1.6454e-05	-9.144e-06	-7.6147e-05		-0.1444	7.15e-07		6.445e-06	-3.9949e-05	-5.124e-06
-0.1442	0.0109963		0.0106989	0.011302	0.0116863		-0.1442	0.0108336		0.0111067	0.0111616	0.0117443		-0.1442	-2.6073e-05		-1.9385e-05	-1.0073e-05	-8.4754e-05		-0.1442	-3.781e-06		2.163e-06	-3.7115e-05	-1.2546e-05
-0.144	0.0109931		0.0107032	0.0113056	0.0116843		-0.144	0.0108339		0.0111068	0.011166	0.0117369		-0.144	-2.9234e-05		-1.5017e-05	-6.412e-06	-8.6771e-05		-0.144	-3.534e-06		2.248e-06	-3.2796e-05	-1.9985e-05
-0.1438	0.0109916		0.0106987	0.0113075	0.0116831		-0.1438	0.0108337		0.0111081	0.0111651	0.0117339		-0.1438	-3.0782e-05		-1.9523e-05	-4.57e-06	-8.792e-05		-0.1438	-3.682e-06		3.519e-06	-3.3677e-05	-2.2963e-05
-0.1436	0.0109946		0.0106991	0.011314	0.0116777		-0.1436	0.0108182		0.0111054	0.0111567	0.0117289		-0.1436	-2.7696e-05		-1.9147e-05	1.992e-06	-9.34e-05		-0.1436	-1.9206e-05		8.98e-07	-4.2073e-05	-2.7934e-05
-0.1434	0.010993		0.010697	0.0113071	0.0116851		-0.1434	0.0108232		0.0111226	0.0111704	0.0117282		-0.1434	-2.9316e-05		-2.1214e-05	-4.901e-06	-8.5907e-05		-0.1434	-1.4159e-05		1.8027e-05	-2.8371e-05	-2.8672e-05
-0.1432	0.0109936		0.0106965	0.0113098	0.0116921		-0.1432	0.0108143		0.0111217	0.0111747	0.0117198		-0.1432	-2.8722e-05		-2.1751e-05	-2.231e-06	-7.8938e-05		-0.1432	-2.312e-05		1.7181e-05	-2.4078e-05	-3.7009e-05
-0.143	0.0109936		0.0106941	0.0113117	0.0116949		-0.143	0.010801		0.0111249	0.0111728	0.0117305		-0.143	-2.8784e-05		-2.4198e-05	-3.47e-07	-7.6107e-05		-0.143	-3.6427e-05		2.0385e-05	-2.5991e-05	-2.6384e-05
-0.1428	0.0109869		0.0106958	0.0113116	0.011699		-0.1428	0.0107991		0.011127	0.0111723	0.0117236		-0.1428	-3.5406e-05		-2.247e-05	-4.32e-07	-7.2011e-05		-0.1428	-3.8301e-05		2.245e-05	-2.6443e-05	-3.3268e-05
-0.1426	0.0109813		0.0106957	0.0113186	0.0116917		-0.1426	0.0107986		0.0111307	0.0111679	0.01173		-0.1426	-4.1023e-05		-2.2507e-05	6.597e-06	-7.9327e-05		-0.1426	-3.8823e-05		2.614e-05	-3.0892e-05	-2.6827e-05
-0.1424	0.01098		0.0106951	0.0113125	0.0116904		-0.1424	0.0107989		0.011132	0.0111649	0.0117287		-0.1424	-4.232e-05		-2.3175e-05	4.95e-07	-8.065e-05		-0.1424	-3.8524e-05		2.7513e-05	-3.3878e-05	-2.8193e-05
-0.1422	0.0109748		0.0106987	0.0113054	0.0116906		-0.1422	0.0108006		0.0111308	0.0111564	0.0117342		-0.1422	-4.7586e-05		-1.9597e-05	-6.656e-06	-8.0456e-05		-0.1422	-3.6765e-05		2.6227e-05	-4.2398e-05	-2.2622e-05
-0.142	0.0109716		0.0106906	0.0113077	0.0116858		-0.142	0.0108035		0.0111389	0.0111507	0.0117263		-0.142	-5.0744e-05		-2.7669e-05	-4.385e-06	-8.5268e-05		-0.142	-3.3939e-05		3.4413e-05	-4.8056e-05	-3.0538e-05
-0.1418	0.0109665		0.0106858	0.011305	0.0116887		-0.1418	0.0107933		0.0111358	0.0111444	0.0117346		-0.1418	-5.5868e-05		-3.2418e-05	-7.018e-06	-8.2317e-05		-0.1418	-4.4087e-05		3.1238e-05	-5.431e-05	-2.2206e-05
-0.1416	0.0109654		0.0106877	0.0113056	0.0116893		-0.1416	0.0107927		0.0111236	0.0111423	0.0117378		-0.1416	-5.6901e-05		-3.056e-05	-6.458e-06	-8.1764e-05		-0.1416	-4.4695e-05		1.9024e-05	-5.6446e-05	-1.9092e-05
-0.1414	0.010962		0.0106838	0.0113149	0.0116963		-0.1414	0.0107938		0.011123	0.0111474	0.0117305		-0.1414	-6.0329e-05		-3.4426e-05	2.848e-06	-7.4744e-05		-0.1414	-4.3565e-05		1.851e-05	-5.1378e-05	-2.6365e-05
-0.1412	0.0109689		0.0106833	0.01131	0.011701		-0.1412	0.010803		0.0111182	0.0111417	0.0117289		-0.1412	-5.3463e-05		-3.4952e-05	-2.069e-06	-7.0041e-05		-0.1412	-3.4437e-05		1.3658e-05	-5.7085e-05	-2.7923e-05
-0.141	0.0109707		0.010686	0.0113069	0.0117007		-0.141	0.0108199		0.0111188	0.011146	0.011729		-0.141	-5.1617e-05		-3.2225e-05	-5.149e-06	-7.0341e-05		-0.141	-1.75e-05		1.4219e-05	-5.2741e-05	-2.7897e-05
-0.1408	0.0109654		0.0106832	0.011303	0.0117088		-0.1408	0.0108239		0.0111142	0.0111509	0.011727		-0.1408	-5.6894e-05		-3.5064e-05	-9.011e-06	-6.2235e-05		-0.1408	-1.3522e-05		9.618e-06	-4.7824e-05	-2.981e-05
-0.1406	0.0109651		0.0106882	0.0112975	0.0117087		-0.1406	0.0108097		0.0111164	0.0111485	0.0117242		-0.1406	-5.7237e-05		-3.003e-05	-1.4582e-05	-6.2342e-05		-0.1406	-2.7695e-05		1.1913e-05	-5.0224e-05	-3.2673e-05
-0.1404	0.0109655		0.0106932	0.0113042	0.011719		-0.1404	0.010809		0.0111135	0.0111528	0.0117296		-0.1404	-5.6835e-05		-2.5084e-05	-7.828e-06	-5.2063e-05		-0.1404	-2.8388e-05		8.946e-06	-4.6001e-05	-2.7264e-05
-0.1402	0.0109655		0.0106888	0.0113156	0.0117099		-0.1402	0.0108044		0.0111134	0.0111458	0.0117188		-0.1402	-5.6835e-05		-2.9415e-05	3.56e-06	-6.1122e-05		-0.1402	-3.2975e-05		8.898e-06	-5.2975e-05	-3.8054e-05
-0.14	0.0109705		0.0106934	0.0113145	0.011709		-0.14	0.0108119		0.0111237	0.0111496	0.01172		-0.14	-5.1847e-05		-2.489e-05	2.419e-06	-6.2051e-05		-0.14	-2.5511e-05		1.9124e-05	-4.9141e-05	-3.6819e-05
-0.1398	0.0109641		0.0106919	0.0113084	0.011709		-0.1398	0.0108097		0.0111262	0.0111519	0.0117297		-0.1398	-5.8205e-05		-2.6391e-05	-3.596e-06	-6.2038e-05		-0.1398	-2.7752e-05		2.1699e-05	-4.6817e-05	-2.7155e-05
-0.1396	0.0109615		0.0107009	0.0113046	0.0117049		-0.1396	0.0108062		0.0111216	0.0111551	0.0117288		-0.1396	-6.0888e-05		-1.7319e-05	-7.478e-06	-6.6111e-05		-0.1396	-3.1238e-05		1.708e-05	-4.3626e-05	-2.8059e-05
-0.1394	0.0109491		0.0107018	0.0113096	0.0117085		-0.1394	0.0107976		0.0111156	0.0111538	0.0117334		-0.1394	-7.3202e-05		-1.644e-05	-2.425e-06	-6.2535e-05		-0.1394	-3.9833e-05		1.1064e-05	-4.4976e-05	-2.3435e-05
-0.1392	0.0109554		0.0107084	0.0113116	0.0117141		-0.1392	0.0107975		0.0111148	0.0111611	0.0117451		-0.1392	-6.6925e-05		-9.868e-06	-4.46e-07	-5.6911e-05		-0.1392	-3.9927e-05		1.0306e-05	-3.7624e-05	-1.1796e-05
-0.139	0.0109527		0.0107048	0.0113135	0.0117084		-0.139	0.0108038		0.0111124	0.0111633	0.0117415		-0.139	-6.9645e-05		-1.3492e-05	1.459e-06	-6.2657e-05		-0.139	-3.3585e-05		7.872e-06	-3.548e-05	-1.5325e-05
-0.1388	0.0109571		0.0106976	0.0113139	0.0117053		-0.1388	0.0108024		0.0111117	0.0111568	0.0117472		-0.1388	-6.529e-05		-2.061e-05	1.838e-06	-6.5711e-05		-0.1388	-3.4994e-05		7.144e-06	-4.1959e-05	-9.653e-06
-0.1386	0.0109521		0.0106997	0.0113169	0.011714		-0.1386	0.010817		0.0111142	0.0111531	0.011743		-0.1386	-7.0222e-05		-1.8543e-05	4.83e-06	-5.7041e-05		-0.1386	-2.0454e-05		9.706e-06	-4.5704e-05	-1.3875e-05
-0.1384	0.0109544		0.0106976	0.0113211	0.0117139		-0.1384	0.0108186		0.0111153	0.0111509	0.0117519		-0.1384	-6.7893e-05		-2.0651e-05	9.096e-06	-5.7168e-05		-0.1384	-1.8799e-05		1.0725e-05	-4.7904e-05	-4.943e-06
-0.1382	0.0109593		0.0106987	0.0113276	0.0117146		-0.1382	0.0108174		0.0111162	0.0111506	0.0117612		-0.1382	-6.3027e-05		-1.9504e-05	1.5572e-05	-5.6481e-05		-0.1382	-1.9969e-05		1.1644e-05	-4.8145e-05	4.343e-06
-0.138	0.0109677		0.0106977	0.0113278	0.0117183		-0.138	0.0108203		0.0111157	0.0111538	0.0117711		-0.138	-5.4604e-05		-2.0592e-05	1.5742e-05	-5.2783e-05		-0.138	-1.7059e-05		1.1147e-05	-4.4906e-05	1.4261e-05
-0.1378	0.0109659		0.0106961	0.0113332	0.0117149		-0.1378	0.0108161		0.0111084	0.0111569	0.0117767		-0.1378	-5.6492e-05		-2.2188e-05	2.1198e-05	-5.6143e-05		-0.1378	-2.1312e-05		3.873e-06	-4.1822e-05	1.9887e-05
-0.1376	0.0109633		0.010699	0.0113372	0.0117145		-0.1376	0.010818		0.0111038	0.0111514	0.0117725		-0.1376	-5.9052e-05		-1.9226e-05	2.5108e-05	-5.6584e-05		-0.1376	-1.9435e-05		-6.95e-07	-4.7404e-05	1.5629e-05
-0.1374	0.0109661		0.0106934	0.0113442	0.0117158		-0.1374	0.0108155		0.0110953	0.0111447	0.0117711		-0.1374	-5.628e-05		-2.4892e-05	3.2145e-05	-5.524e-05		-0.1374	-2.1899e-05		-9.25e-06	-5.4101e-05	1.4239e-05
-0.1372	0.0109641		0.0106902	0.0113384	0.0117152		-0.1372	0.0108251		0.0110935	0.0111477	0.0117582		-0.1372	-5.8245e-05		-2.8033e-05	2.6321e-05	-5.5818e-05		-0.1372	-1.232e-05		-1.1054e-05	-5.1091e-05	1.349e-06
-0.137	0.0109604		0.0106895	0.0113422	0.0117189		-0.137	0.0108379		0.0110887	0.0111523	0.0117571		-0.137	-6.1921e-05		-2.8776e-05	3.0163e-05	-5.2119e-05		-0.137	4.66e-07		-1.5878e-05	-4.6466e-05	2.27e-07
-0.1368	0.0109679		0.0106906	0.0113478	0.0117207		-0.1368	0.010827		0.0110861	0.0111437	0.0117563		-0.1368	-5.449e-05		-2.7626e-05	3.5755e-05	-5.0373e-05		-0.1368	-1.0388e-05		-1.8399e-05	-5.5057e-05	-5.9e-07
-0.1366	0.0109715		0.0106901	0.011352	0.0117256		-0.1366	0.0108223		0.0110928	0.0111519	0.011757		-0.1366	-5.0801e-05		-2.8131e-05	3.9985e-05	-4.5435e-05		-0.1366	-1.5142e-05		-1.1691e-05	-4.6821e-05	1.21e-07
-0.1364	0.010972		0.0106922	0.0113613	0.011723		-0.1364	0.0108338		0.0110942	0.0111617	0.0117533		-0.1364	-5.0348e-05		-2.6078e-05	4.9282e-05	-4.81e-05		-0.1364	-3.573e-06		-1.0387e-05	-3.7088e-05	-3.575e-06
-0.1362	0.0109648		0.010696	0.0113643	0.0117269		-0.1362	0.0108384		0.0111	0.011153	0.0117589		-0.1362	-5.7581e-05		-2.2267e-05	5.2241e-05	-4.4185e-05		-0.1362	9.73e-07		-4.543e-06	-4.5796e-05	2.087e-06
-0.136	0.0109702		0.0106894	0.0113605	0.011725		-0.136	0.0108336		0.0111034	0.0111504	0.0117639		-0.136	-5.211e-05		-2.8805e-05	4.8436e-05	-4.6074e-05		-0.136	-3.796e-06		-1.104e-06	-4.8311e-05	7.056e-06
-0.1358	0.0109676		0.0106828	0.0113622	0.0117193		-0.1358	0.0108426		0.0110997	0.0111498	0.0117704		-0.1358	-5.4757e-05		-3.5416e-05	5.0153e-05	-5.18e-05		-0.1358	5.171e-06		-4.859e-06	-4.8932e-05	1.3586e-05
-0.1356	0.0109703		0.0106885	0.0113626	0.0117192		-0.1356	0.0108494		0.0110938	0.0111586	0.0117704		-0.1356	-5.1994e-05		-2.9709e-05	5.0568e-05	-5.1811e-05		-0.1356	1.2015e-05		-1.0721e-05	-4.0167e-05	1.3541e-05
-0.1354	0.0109694		0.0106911	0.0113633	0.0117242		-0.1354	0.0108479		0.0110961	0.0111579	0.0117719		-0.1354	-5.2977e-05		-2.7122e-05	5.1221e-05	-4.6811e-05		-0.1354	1.0538e-05		-8.482e-06	-4.0818e-05	1.5081e-05
-0.1352	0.010974		0.0107011	0.0113645	0.011721		-0.1352	0.0108448		0.0110894	0.0111555	0.0117794		-0.1352	-4.8332e-05		-1.71e-05	5.2434e-05	-5.0066e-05		-0.1352	7.432e-06		-1.5147e-05	-4.3292e-05	2.2507e-05
-0.135	0.0109825		0.0106928	0.0113558	0.0117241		-0.135	0.0108398		0.011083	0.0111592	0.0117735		-0.135	-3.9854e-05		-2.5412e-05	4.3799e-05	-4.6915e-05		-0.135	2.437e-06		-2.1557e-05	-3.9557e-05	1.6702e-05
-0.1348	0.0109817		0.0106929	0.0113554	0.0117228		-0.1348	0.0108416		0.011084	0.0111601	0.0117715		-0.1348	-4.0648e-05		-2.538e-05	4.3386e-05	-4.821e-05		-0.1348	4.179e-06		-2.0518e-05	-3.8703e-05	1.4615e-05
-0.1346	0.0109827		0.010686	0.0113413	0.0117264		-0.1346	0.0108535		0.0110906	0.0111571	0.0117771		-0.1346	-3.9666e-05		-3.2286e-05	2.9261e-05	-4.4626e-05		-0.1346	1.6065e-05		-1.3905e-05	-4.169e-05	2.0295e-05
-0.1344	0.0109829		0.0106939	0.0113451	0.0117387		-0.1344	0.0108525		0.0111023	0.0111609	0.0117663		-0.1344	-3.9464e-05		-2.4335e-05	3.3015e-05	-3.2369e-05		-0.1344	1.5139e-05		-2.196e-06	-3.7824e-05	9.45e-06
-0.1342	0.0109828		0.0106969	0.0113394	0.0117352		-0.1342	0.0108568		0.0111005	0.0111612	0.0117806		-0.1342	-3.9507e-05		-2.1327e-05	2.7378e-05	-3.5826e-05		-0.1342	1.9378e-05		-3.993e-06	-3.7573e-05	2.3729e-05
-0.134	0.0109818		0.0106988	0.0113355	0.0117278		-0.134	0.0108575		0.0110913	0.0111685	0.0117877		-0.134	-4.0583e-05		-1.9498e-05	2.3427e-05	-4.3238e-05		-0.134	2.0142e-05		-1.3278e-05	-3.0302e-05	3.083e-05
-0.1338	0.0109832		0.0107049	0.011333	0.0117311		-0.1338	0.0108611		0.0110892	0.0111661	0.0117899		-0.1338	-3.9128e-05		-1.3355e-05	2.0962e-05	-3.9945e-05		-0.1338	2.3664e-05		-1.5361e-05	-3.2705e-05	3.3044e-05
-0.1336	0.0109809		0.0107057	0.0113257	0.0117251		-0.1336	0.010858		0.0110823	0.0111764	0.0117893		-0.1336	-4.1416e-05		-1.257e-05	1.3661e-05	-4.6005e-05		-0.1336	2.0614e-05		-2.2212e-05	-2.2397e-05	3.2495e-05
-0.1334	0.0109774		0.0107131	0.0113199	0.0117353		-0.1334	0.0108524		0.0110767	0.011177	0.0117941		-0.1334	-4.4915e-05		-5.111e-06	7.822e-06	-3.5757e-05		-0.1334	1.5009e-05		-2.7824e-05	-2.1766e-05	3.7223e-05
-0.1332	0.0109752		0.0107022	0.0113208	0.0117379		-0.1332	0.0108615		0.0110692	0.0111878	0.011797		-0.1332	-4.716e-05		-1.6063e-05	8.751e-06	-3.3162e-05		-0.1332	2.4066e-05		-3.5323e-05	-1.0914e-05	4.0108e-05
-0.133	0.0109779		0.0107056	0.0113196	0.0117347		-0.133	0.0108602		0.0110711	0.0111817	0.0118046		-0.133	-4.4419e-05		-1.2662e-05	7.579e-06	-3.6378e-05		-0.133	2.2843e-05		-3.345e-05	-1.7069e-05	4.7777e-05
-0.1328	0.0109832		0.0107064	0.0113156	0.0117357		-0.1328	0.0108544		0.0110706	0.0111836	0.0118079		-0.1328	-3.9099e-05		-1.188e-05	3.545e-06	-3.5379e-05		-0.1328	1.7027e-05		-3.3951e-05	-1.5147e-05	5.1055e-05
-0.1326	0.0109836		0.0106992	0.0113209	0.0117323		-0.1326	0.0108605		0.0110614	0.0111966	0.0118065		-0.1326	-3.8739e-05		-1.9034e-05	8.833e-06	-3.8731e-05		-0.1326	2.3089e-05		-4.3171e-05	-2.197e-06	4.9656e-05
-0.1324	0.0109793		0.010694	0.0113243	0.0117336		-0.1324	0.0108468		0.0110548	0.0112014	0.0118114		-0.1324	-4.3026e-05		-2.4259e-05	1.2267e-05	-3.7405e-05		-0.1324	9.387e-06		-4.9767e-05	2.628e-06	5.4506e-05
-0.1322	0.0109877		0.0107004	0.0113216	0.0117309		-0.1322	0.0108447		0.0110538	0.0112059	0.0118144		-0.1322	-3.4655e-05		-1.7822e-05	9.533e-06	-4.0179e-05		-0.1322	7.273e-06		-5.0728e-05	7.125e-06	5.7583e-05
-0.132	0.0109831		0.0106906	0.0113244	0.0117283		-0.132	0.0108505		0.0110691	0.0112006	0.0118088		-0.132	-3.9253e-05		-2.7609e-05	1.2396e-05	-4.2804e-05		-0.132	1.3077e-05		-3.5449e-05	1.832e-06	5.1974e-05
-0.1318	0.0109791		0.0106967	0.0113223	0.0117298		-0.1318	0.0108552		0.0110713	0.0112038	0.0117961		-0.1318	-4.3214e-05		-2.1571e-05	1.0209e-05	-4.1278e-05		-0.1318	1.7754e-05		-3.3277e-05	5.071e-06	3.9214e-05
-0.1316	0.0109798		0.0106948	0.0113249	0.0117357		-0.1316	0.0108623		0.0110759	0.011197	0.0117955		-0.1316	-4.2531e-05		-2.3444e-05	1.2903e-05	-3.5361e-05		-0.1316	2.4852e-05		-2.8678e-05	-1.767e-06	3.867e-05
-0.1314	0.0109806		0.0106967	0.0113253	0.011741		-0.1314	0.0108641		0.0110788	0.0111982	0.0117943		-0.1314	-4.1766e-05		-2.1579e-05	1.327e-05	-3.0079e-05		-0.1314	2.6672e-05		-2.5707e-05	-5.33e-07	3.7407e-05
-0.1312	0.0109768		0.0106993	0.0113263	0.0117448		-0.1312	0.0108617		0.0110723	0.0111951	0.011814		-0.1312	-4.5532e-05		-1.8998e-05	1.4238e-05	-2.6292e-05		-0.1312	2.4333e-05		-3.2244e-05	-3.642e-06	5.7125e-05
-0.131	0.0109766		0.0106964	0.0113271	0.0117374		-0.131	0.0108614		0.0110724	0.0111939	0.011806		-0.131	-4.5723e-05		-2.1845e-05	1.5072e-05	-3.3697e-05		-0.131	2.4001e-05		-3.2103e-05	-4.904e-06	4.9117e-05
-0.1308	0.0109753		0.0106902	0.0113323	0.0117338		-0.1308	0.0108612		0.0110638	0.011187	0.0118108		-0.1308	-4.6996e-05		-2.8064e-05	2.0262e-05	-3.728e-05		-0.1308	2.3838e-05		-4.0737e-05	-1.1707e-05	5.3988e-05
-0.1306	0.0109804		0.0106894	0.0113226	0.0117336		-0.1306	0.0108685		0.0110629	0.0111934	0.0118056		-0.1306	-4.1953e-05		-2.8842e-05	1.0585e-05	-3.7465e-05		-0.1306	3.1112e-05		-4.1621e-05	-5.324e-06	4.8728e-05
-0.1304	0.0109793		0.0106995	0.0113171	0.0117265		-0.1304	0.0108742		0.0110634	0.0111875	0.0118		-0.1304	-4.3027e-05		-1.8713e-05	5.009e-06	-4.4578e-05		-0.1304	3.6747e-05		-4.1123e-05	-1.1237e-05	4.315e-05
-0.1302	0.0109808		0.0106962	0.0113148	0.0117327		-0.1302	0.010867		0.0110528	0.0111888	0.0117982		-0.1302	-4.1587e-05		-2.2078e-05	2.782e-06	-3.8345e-05		-0.1302	2.9632e-05		-5.17e-05	-9.935e-06	4.1306e-05
-0.13	0.0109842		0.0107006	0.0113113	0.0117347		-0.13	0.0108687		0.0110508	0.0111831	0.0118043		-0.13	-3.8095e-05		-1.7697e-05	-7.65e-07	-3.6372e-05		-0.13	3.1293e-05		-5.3702e-05	-1.5627e-05	4.7458e-05
-0.1298	0.0109812		0.0106951	0.011306	0.0117377		-0.1298	0.0108795		0.0110398	0.0111797	0.0118132		-0.1298	-4.1142e-05		-2.3133e-05	-6.039e-06	-3.3402e-05		-0.1298	4.2141e-05		-6.4784e-05	-1.9044e-05	5.6358e-05
-0.1296	0.0109823		0.0106963	0.0113079	0.0117352		-0.1296	0.0108833		0.0110447	0.0111754	0.0118131		-0.1296	-4.005e-05		-2.1907e-05	-4.126e-06	-3.5874e-05		-0.1296	4.5919e-05		-5.9833e-05	-2.3316e-05	5.6277e-05
-0.1294	0.0109761		0.0106892	0.0113089	0.0117443		-0.1294	0.0108876		0.0110381	0.0111741	0.0118123		-0.1294	-4.6246e-05		-2.9075e-05	-3.143e-06	-2.6745e-05		-0.1294	5.0147e-05		-6.6408e-05	-2.4655e-05	5.5448e-05
-0.1292	0.0109768		0.010696	0.011313	0.0117442		-0.1292	0.0108992		0.0110296	0.011172	0.0118118		-0.1292	-4.5527e-05		-2.2212e-05	9.44e-07	-2.6834e-05		-0.1292	6.1783e-05		-7.4902e-05	-2.6722e-05	5.4961e-05
-0.129	0.0109826		0.0106986	0.0113163	0.0117434		-0.129	0.0109025		0.0110268	0.0111786	0.011813		-0.129	-3.9699e-05		-1.9695e-05	4.3e-06	-2.7622e-05		-0.129	6.5077e-05		-7.7775e-05	-2.0128e-05	5.6185e-05
-0.1288	0.0109759		0.0106938	0.0113119	0.0117423		-0.1288	0.0109005		0.0110262	0.0111785	0.0118019		-0.1288	-4.6439e-05		-2.4456e-05	-1.87e-07	-2.8801e-05		-0.1288	6.307e-05		-7.8357e-05	-2.0207e-05	4.5018e-05
-0.1286	0.0109735		0.0106888	0.0113119	0.0117378		-0.1286	0.0109021		0.0110289	0.011176	0.011806		-0.1286	-4.8828e-05		-2.944e-05	-1.09e-07	-3.3251e-05		-0.1286	6.4713e-05		-7.563e-05	-2.2787e-05	4.913e-05
-0.1284	0.0109684		0.0106915	0.0113082	0.0117411		-0.1284	0.0109046		0.0110412	0.0111686	0.0118136		-0.1284	-5.3972e-05		-2.6772e-05	-3.833e-06	-2.9957e-05		-0.1284	6.7165e-05		-6.3317e-05	-3.0135e-05	5.6742e-05
-0.1282	0.010972		0.0106908	0.0113115	0.0117337		-0.1282	0.0109053		0.0110439	0.0111633	0.0118062		-0.1282	-5.0338e-05		-2.7424e-05	-5.05e-07	-3.7377e-05		-0.1282	6.7867e-05		-6.0641e-05	-3.5496e-05	4.9336e-05
-0.128	0.0109731		0.0106864	0.0113187	0.0117392		-0.128	0.0109014		0.0110421	0.0111653	0.0118085		-0.128	-4.9238e-05		-3.1831e-05	6.651e-06	-3.1881e-05		-0.128	6.3959e-05		-6.2422e-05	-3.3437e-05	5.1673e-05
-0.1278	0.0109713		0.0106822	0.0113091	0.0117386		-0.1278	0.0109008		0.0110408	0.0111613	0.0117986		-0.1278	-5.1081e-05		-3.6011e-05	-2.915e-06	-3.2413e-05		-0.1278	6.3349e-05		-6.3768e-05	-3.7465e-05	4.1717e-05
-0.1276	0.0109703		0.010683	0.0113101	0.0117359		-0.1276	0.0108979		0.0110378	0.0111581	0.0118097		-0.1276	-5.2038e-05		-3.5247e-05	-1.963e-06	-3.5196e-05		-0.1276	6.0538e-05		-6.6695e-05	-4.0658e-05	5.2808e-05
-0.1274	0.010968		0.0106848	0.0113074	0.0117247		-0.1274	0.0108979		0.0110437	0.0111617	0.0118127		-0.1274	-5.4359e-05		-3.3451e-05	-4.614e-06	-4.6372e-05		-0.1274	6.0544e-05		-6.0799e-05	-3.7027e-05	5.5834e-05
-0.1272	0.0109573		0.0106914	0.0113079	0.0117158		-0.1272	0.0108994		0.011047	0.0111543	0.0118206		-0.1272	-6.5012e-05		-2.6898e-05	-4.148e-06	-5.5282e-05		-0.1272	6.1948e-05		-5.7489e-05	-4.4447e-05	6.3741e-05
-0.127	0.0109586		0.0106835	0.0113042	0.0117128		-0.127	0.0108961		0.0110493	0.0111594	0.0118178		-0.127	-6.3717e-05		-3.4724e-05	-7.881e-06	-5.8265e-05		-0.127	5.868e-05		-5.5255e-05	-3.9379e-05	6.0935e-05
-0.1268	0.0109548		0.0106852	0.0113083	0.0117139		-0.1268	0.0109036		0.0110529	0.0111632	0.0118151		-0.1268	-6.7554e-05		-3.301e-05	-3.697e-06	-5.72e-05		-0.1268	6.6175e-05		-5.1619e-05	-3.5601e-05	5.829e-05
-0.1266	0.0109543		0.0106819	0.0113116	0.0117047		-0.1266	0.0108992		0.0110562	0.0111585	0.0118223		-0.1266	-6.8045e-05		-3.6312e-05	-4.49e-07	-6.632e-05		-0.1266	6.1818e-05		-4.8306e-05	-4.0257e-05	6.545e-05
-0.1264	0.0109524		0.010682	0.0113148	0.011694		-0.1264	0.0108964		0.0110586	0.011159	0.0118353		-0.1264	-6.9918e-05		-3.6216e-05	2.782e-06	-7.707e-05		-0.1264	5.9033e-05		-4.5946e-05	-3.9719e-05	7.8484e-05
-0.1262	0.0109508		0.0106834	0.0113137	0.0116891		-0.1262	0.0108869		0.0110571	0.0111522	0.0118202		-0.1262	-7.1545e-05		-3.4849e-05	1.646e-06	-8.1929e-05		-0.1262	4.9491e-05		-4.741e-05	-4.6555e-05	6.3364e-05
-0.126	0.010947		0.0106806	0.0113068	0.0116754		-0.126	0.0108921		0.0110582	0.0111532	0.0118199		-0.126	-7.5296e-05		-3.7694e-05	-5.217e-06	-9.5608e-05		-0.126	5.473e-05		-4.6374e-05	-4.558e-05	6.3049e-05
-0.1258	0.0109427		0.0106764	0.0113012	0.0116677		-0.1258	0.0108924		0.0110621	0.0111502	0.0118269		-0.1258	-7.9648e-05		-4.1888e-05	-1.0818e-05	-0.000103398		-0.1258	5.4968e-05		-4.2402e-05	-4.8587e-05	7.0053e-05
-0.1256	0.0109431		0.0106829	0.0113033	0.0116764		-0.1256	0.0108825		0.011062	0.0111504	0.0118212		-0.1256	-7.923e-05		-3.5356e-05	-8.775e-06	-9.4693e-05		-0.1256	4.5133e-05		-4.2538e-05	-4.8367e-05	6.4402e-05
-0.1254	0.0109403		0.0106875	0.0113043	0.0116656		-0.1254	0.010886		0.0110495	0.0111422	0.0118285		-0.1254	-8.1996e-05		-3.0745e-05	-7.796e-06	-0.000105416		-0.1254	4.8555e-05		-5.5011e-05	-5.6514e-05	7.1623e-05
-0.1252	0.0109355		0.010692	0.0113139	0.0116549		-0.1252	0.0108818		0.0110494	0.0111369	0.011838		-0.1252	-8.6844e-05		-2.6248e-05	1.835e-06	-0.000116174		-0.1252	4.4401e-05		-5.5113e-05	-6.1906e-05	8.1175e-05
-0.125	0.0109303		0.0106918	0.0113178	0.0116497		-0.125	0.0108769		0.011041	0.0111356	0.0118468		-0.125	-9.2025e-05		-2.649e-05	5.793e-06	-0.000121313		-0.125	3.9456e-05		-6.3576e-05	-6.3189e-05	8.9905e-05
-0.1248	0.010926		0.0106853	0.0113206	0.0116461		-0.1248	0.0108811		0.0110323	0.0111305	0.0118449		-0.1248	-9.6357e-05		-3.2923e-05	8.58e-06	-0.000124987		-0.1248	4.3681e-05		-7.2254e-05	-6.8258e-05	8.8021e-05
-0.1246	0.0109311		0.0106774	0.0113233	0.0116489		-0.1246	0.0108885		0.0110309	0.0111338	0.0118531		-0.1246	-9.1256e-05		-4.0817e-05	1.1247e-05	-0.000122129		-0.1246	5.1056e-05		-7.3679e-05	-6.4939e-05	9.6242e-05
-0.1244	0.0109285		0.0106782	0.0113193	0.0116538		-0.1244	0.0108941		0.01104	0.011133	0.0118495		-0.1244	-9.3838e-05		-4.0027e-05	7.206e-06	-0.00011726		-0.1244	5.6742e-05		-6.4576e-05	-6.5769e-05	9.2664e-05
-0.1242	0.01093		0.0106798	0.0113194	0.0116633		-0.1242	0.0108957		0.0110394	0.0111233	0.0118458		-0.1242	-9.2351e-05		-3.8479e-05	7.337e-06	-0.000107774		-0.1242	5.8301e-05		-6.5185e-05	-7.5438e-05	8.9002e-05
-0.124	0.0109276		0.0106763	0.011316	0.0116784		-0.124	0.0108794		0.0110363	0.0111202	0.0118593		-0.124	-9.4792e-05		-4.1991e-05	3.913e-06	-9.2616e-05		-0.124	4.1948e-05		-6.8285e-05	-7.8556e-05	0.000102479
-0.1238	0.0109285		0.0106751	0.0113252	0.0116748		-0.1238	0.0108764		0.01103	0.0111115	0.0118596		-0.1238	-9.3869e-05		-4.3132e-05	1.319e-05	-9.6297e-05		-0.1238	3.9046e-05		-7.4497e-05	-8.7207e-05	0.000102797
-0.1236	0.010928		0.0106814	0.0113198	0.0116717		-0.1236	0.0108696		0.0110332	0.0111167	0.0118648		-0.1236	-9.4294e-05		-3.6849e-05	7.782e-06	-9.9313e-05		-0.1236	3.2172e-05		-7.131e-05	-8.2006e-05	0.000107994
-0.1234	0.0109356		0.010683	0.0113265	0.0116668		-0.1234	0.0108691		0.011029	0.0111116	0.0118594		-0.1234	-8.6789e-05		-3.52e-05	1.4458e-05	-0.000104288		-0.1234	3.1695e-05		-7.558e-05	-8.7196e-05	0.000102527
-0.1232	0.0109251		0.0106737	0.0113287	0.011678		-0.1232	0.0108684		0.0110261	0.0111171	0.0118557		-0.1232	-9.7239e-05		-4.4517e-05	1.6636e-05	-9.307e-05		-0.1232	3.095e-05		-7.8458e-05	-8.166e-05	9.8829e-05
-0.123	0.010924		0.0106724	0.0113269	0.0116675		-0.123	0.010871		0.0110291	0.0111201	0.0118677		-0.123	-9.837e-05		-4.5888e-05	1.483e-05	-0.000103521		-0.123	3.3642e-05		-7.5412e-05	-7.8616e-05	0.00011089
-0.1228	0.0109191		0.0106729	0.0113214	0.0116681		-0.1228	0.0108762		0.0110285	0.0111163	0.0118681		-0.1228	-0.000103258		-4.5394e-05	9.334e-06	-0.000102926		-0.1228	3.8837e-05		-7.5997e-05	-8.2472e-05	0.000111266
-0.1226	0.0109115		0.0106727	0.0113277	0.0116634		-0.1226	0.0108694		0.0110351	0.0111096	0.0118651		-0.1226	-0.000110862		-4.5593e-05	1.5651e-05	-0.000107683		-0.1226	3.2043e-05		-6.9481e-05	-8.9109e-05	0.000108231
-0.1224	0.0109133		0.0106713	0.0113271	0.0116659		-0.1224	0.0108733		0.0110292	0.0111107	0.0118586		-0.1224	-0.000109054		-4.6984e-05	1.502e-05	-0.000105132		-0.1224	3.5898e-05		-7.5304e-05	-8.809e-05	0.000101709
-0.1222	0.0109115		0.0106693	0.0113298	0.011675		-0.1222	0.0108724		0.0110319	0.0111086	0.0118548		-0.1222	-0.000110799		-4.8939e-05	1.7714e-05	-9.6019e-05		-0.1222	3.5025e-05		-7.2667e-05	-9.0195e-05	9.7979e-05
-0.122	0.0109054		0.0106753	0.0113281	0.0116824		-0.122	0.0108741		0.0110236	0.0111082	0.011855		-0.122	-0.000116915		-4.2944e-05	1.6081e-05	-8.8607e-05		-0.122	3.667e-05		-8.0931e-05	-9.0604e-05	9.8202e-05
-0.1218	0.0109055		0.0106719	0.0113242	0.0116751		-0.1218	0.0108811		0.0110168	0.011114	0.0118575		-0.1218	-0.000116798		-4.6332e-05	1.2127e-05	-9.5983e-05		-0.1218	4.3699e-05		-8.7729e-05	-8.4708e-05	0.000100657
-0.1216	0.0109092		0.0106697	0.0113232	0.0116651		-0.1216	0.0108848		0.0110253	0.011121	0.011864		-0.1216	-0.000113107		-4.8548e-05	1.1183e-05	-0.000105976		-0.1216	4.7373e-05		-7.9227e-05	-7.7793e-05	0.000107135
-0.1214	0.0109106		0.0106675	0.0113233	0.011662		-0.1214	0.0108839		0.0110195	0.0111261	0.0118679		-0.1214	-0.000111732		-5.0724e-05	1.1222e-05	-0.000109089		-0.1214	4.6455e-05		-8.5044e-05	-7.2619e-05	0.000111045
-0.1212	0.0109071		0.0106641	0.0113284	0.0116625		-0.1212	0.010884		0.011013	0.01112	0.0118728		-0.1212	-0.000115213		-5.4106e-05	1.6367e-05	-0.00010852		-0.1212	4.6569e-05		-9.1487e-05	-7.8725e-05	0.000115954
-0.121	0.0109016		0.0106651	0.0113269	0.0116676		-0.121	0.0108843		0.0110091	0.0111302	0.011879		-0.121	-0.000120738		-5.3192e-05	1.4864e-05	-0.000103492		-0.121	4.6885e-05		-9.5405e-05	-6.8565e-05	0.000122189
-0.1208	0.0109004		0.0106666	0.0113337	0.0116746		-0.1208	0.0108804		0.0110004	0.0111351	0.0118912		-0.1208	-0.000121939		-5.1633e-05	2.1692e-05	-9.6428e-05		-0.1208	4.3011e-05		-0.000104156	-6.3618e-05	0.00013436
-0.1206	0.0108952		0.0106707	0.0113304	0.0116661		-0.1206	0.0108813		0.0110069	0.0111356	0.0118875		-0.1206	-0.000127164		-4.7513e-05	1.8344e-05	-0.000104978		-0.1206	4.389e-05		-9.7659e-05	-6.3129e-05	0.000130646
-0.1204	0.0108907		0.0106717	0.0113324	0.0116661		-0.1204	0.0108872		0.0110043	0.0111368	0.0118792		-0.1204	-0.000131607		-4.6506e-05	2.0397e-05	-0.000104949		-0.1204	4.981e-05		-0.000100264	-6.1931e-05	0.000122304
-0.1202	0.0108935		0.0106666	0.0113385	0.0116668		-0.1202	0.0108912		0.0109983	0.0111406	0.0118703		-0.1202	-0.000128865		-5.1683e-05	2.6449e-05	-0.000104255		-0.1202	5.3748e-05		-0.000106225	-5.8122e-05	0.000113424
-0.12	0.0109002		0.0106678	0.0113324	0.0116673		-0.12	0.010896		0.0109945	0.0111427	0.0118712		-0.12	-0.000122119		-5.0467e-05	2.0343e-05	-0.000103762		-0.12	5.8615e-05		-0.000110082	-5.6096e-05	0.000114374
-0.1198	0.0109046		0.0106663	0.0113354	0.0116632		-0.1198	0.0108974		0.0109997	0.0111515	0.0118718		-0.1198	-0.000117695		-5.1934e-05	2.3323e-05	-0.000107861		-0.1198	6.0012e-05		-0.000104837	-4.7282e-05	0.000114928
-0.1196	0.010903		0.0106646	0.011335	0.0116682		-0.1196	0.0109083		0.0110012	0.0111606	0.0118719		-0.1196	-0.000119309		-5.3691e-05	2.2958e-05	-0.00010285		-0.1196	7.0939e-05		-0.000103369	-3.8113e-05	0.000115051
-0.1194	0.0109013		0.0106716	0.0113404	0.0116652		-0.1194	0.0109095		0.0110059	0.011161	0.0118717		-0.1194	-0.000121009		-4.6684e-05	2.8364e-05	-0.000105835		-0.1194	7.2066e-05		-9.862e-05	-3.7717e-05	0.000114865
-0.1192	0.0109073		0.0106692	0.0113446	0.0116698		-0.1192	0.0109193		0.0110118	0.0111633	0.0118764		-0.1192	-0.000115071		-4.9073e-05	3.2554e-05	-0.00010128		-0.1192	8.1915e-05		-9.2743e-05	-3.5425e-05	0.000119585
-0.119	0.0109108		0.0106816	0.0113406	0.0116772		-0.119	0.0109097		0.0110091	0.01117	0.011879		-0.119	-0.000111566		-3.6693e-05	2.8542e-05	-9.3903e-05		-0.119	7.2323e-05		-9.5414e-05	-2.8755e-05	0.00012219
-0.1188	0.010912		0.0106805	0.0113385	0.0116744		-0.1188	0.0109103		0.0110148	0.0111815	0.0118787		-0.1188	-0.000110368		-3.7732e-05	2.6485e-05	-9.6684e-05		-0.1188	7.2905e-05		-8.9751e-05	-1.7219e-05	0.000121854
-0.1186	0.0109109		0.0106768	0.0113474	0.0116734		-0.1186	0.0109175		0.0110093	0.0111773	0.0118787		-0.1186	-0.000111423		-4.1419e-05	3.5328e-05	-9.7704e-05		-0.1186	8.0125e-05		-9.525e-05	-2.1417e-05	0.000121891
-0.1184	0.0109116		0.0106794	0.011351	0.011667		-0.1184	0.0109202		0.0110085	0.0111713	0.0118778		-0.1184	-0.00011079		-3.8814e-05	3.8999e-05	-0.000104059		-0.1184	8.2787e-05		-9.6027e-05	-2.7474e-05	0.000120954
-0.1182	0.0109084		0.0106771	0.0113528	0.0116596		-0.1182	0.010931		0.0110091	0.0111723	0.0118763		-0.1182	-0.000113939		-4.1145e-05	4.0709e-05	-0.000111453		-0.1182	9.3551e-05		-9.5403e-05	-2.6494e-05	0.000119438
-0.118	0.0109061		0.0106796	0.0113537	0.0116614		-0.118	0.0109309		0.0110055	0.0111542	0.0118669		-0.118	-0.000116273		-3.8626e-05	4.1668e-05	-0.00010962		-0.118	9.3491e-05		-9.9013e-05	-4.4534e-05	0.00011006
-0.1178	0.0109073		0.0106811	0.011357	0.0116456		-0.1178	0.0109302		0.0110065	0.0111378	0.0118729		-0.1178	-0.000115071		-3.7144e-05	4.4939e-05	-0.000125437		-0.1178	9.2767e-05		-9.7989e-05	-6.0909e-05	0.000116009
-0.1176	0.0109067		0.0106859	0.0113606	0.0116438		-0.1176	0.0109183		0.0110013	0.0111479	0.0118662		-0.1176	-0.000115678		-3.2314e-05	4.858e-05	-0.000127249		-0.1176	8.0862e-05		-0.000103205	-5.0808e-05	0.000109395
-0.1174	0.0109067		0.0106872	0.0113605	0.0116391		-0.1174	0.0109177		0.0110045	0.0111472	0.0118681		-0.1174	-0.000115623		-3.1084e-05	4.848e-05	-0.000131913		-0.1174	8.0333e-05		-0.000100034	-5.1556e-05	0.000111251
-0.1172	0.0108997		0.0106823	0.0113583	0.0116405		-0.1172	0.0109187		0.0110112	0.0111483	0.0118772		-0.1172	-0.00012269		-3.5944e-05	4.6248e-05	-0.000130529		-0.1172	8.1325e-05		-9.3289e-05	-5.0435e-05	0.000120318
-0.117	0.0108946		0.0106857	0.0113605	0.0116355		-0.117	0.0109336		0.0110123	0.0111562	0.0118822		-0.117	-0.000127749		-3.2553e-05	4.8478e-05	-0.000135559		-0.117	9.6173e-05		-9.2254e-05	-4.2558e-05	0.00012531
-0.1168	0.0108896		0.0106891	0.0113573	0.0116356		-0.1168	0.0109356		0.0110147	0.0111687	0.0118813		-0.1168	-0.000132736		-2.917e-05	4.5277e-05	-0.000135422		-0.1168	9.8161e-05		-8.9825e-05	-3.0043e-05	0.000124451
-0.1166	0.0108929		0.0106954	0.0113562	0.0116461		-0.1166	0.0109424		0.0110149	0.0111702	0.0118888		-0.1166	-0.000129422		-2.2872e-05	4.4202e-05	-0.000124942		-0.1166	0.000105036		-8.9665e-05	-2.8514e-05	0.000131914
-0.1164	0.0109017		0.0106981	0.0113565	0.0116384		-0.1164	0.0109334		0.0110206	0.0111766	0.0118795		-0.1164	-0.000120663		-2.0128e-05	4.4459e-05	-0.000132646		-0.1164	9.5979e-05		-8.3921e-05	-2.2196e-05	0.000122702
-0.1162	0.0108972		0.0106935	0.0113544	0.0116371		-0.1162	0.0109297		0.0110234	0.0111835	0.0118752		-0.1162	-0.000125192		-2.4711e-05	4.232e-05	-0.000133923		-0.1162	9.2315e-05		-8.1111e-05	-1.5275e-05	0.000118399
-0.116	0.0108854		0.0107011	0.011353	0.0116299		-0.116	0.010929		0.0110195	0.011185	0.0118716		-0.116	-0.000136934		-1.7104e-05	4.0907e-05	-0.000141173		-0.116	9.1599e-05		-8.5031e-05	-1.3756e-05	0.000114764
-0.1158	0.0108806		0.0107006	0.0113484	0.0116352		-0.1158	0.0109274		0.011015	0.0111812	0.0118623		-0.1158	-0.000141727		-1.7664e-05	3.6348e-05	-0.000135838		-0.1158	8.9991e-05		-8.9504e-05	-1.7566e-05	0.000105456
-0.1156	0.0108807		0.0106978	0.0113508	0.0116381		-0.1156	0.0109179		0.0110172	0.0111855	0.0118649		-0.1156	-0.00014167		-2.0469e-05	3.8771e-05	-0.000132953		-0.1156	8.0459e-05		-8.7303e-05	-1.3283e-05	0.000108058
-0.1154	0.010881		0.0106966	0.0113544	0.0116365		-0.1154	0.0109218		0.0110102	0.0111845	0.0118709		-0.1154	-0.000141348		-2.1672e-05	4.2318e-05	-0.000134548		-0.1154	8.4414e-05		-9.4374e-05	-1.422e-05	0.000114043
-0.1152	0.0108804		0.0106881	0.0113572	0.0116339		-0.1152	0.0109199		0.0110091	0.0111942	0.0118791		-0.1152	-0.00014199		-3.0156e-05	4.5188e-05	-0.000137118		-0.1152	8.245e-05		-9.5469e-05	-4.548e-06	0.000122207
-0.115	0.0108792		0.010694	0.0113608	0.0116267		-0.115	0.0109113		0.0110101	0.0111954	0.0118796		-0.115	-0.000143095		-2.4274e-05	4.8723e-05	-0.000144348		-0.115	7.3851e-05		-9.4391e-05	-3.323e-06	0.00012273
-0.1148	0.0108782		0.0106945	0.0113672	0.0116275		-0.1148	0.0109109		0.0110038	0.0111912	0.0118728		-0.1148	-0.000144188		-2.3753e-05	5.5197e-05	-0.000143513		-0.1148	7.353e-05		-0.000100772	-7.563e-06	0.00011599
-0.1146	0.010879		0.010697	0.0113678	0.0116183		-0.1146	0.0109074		0.0110052	0.011196	0.0118705		-0.1146	-0.000143308		-2.1297e-05	5.5741e-05	-0.00015271		-0.1146	6.9982e-05		-9.9318e-05	-2.715e-06	0.000113653
-0.1144	0.0108752		0.0106963	0.0113705	0.0116169		-0.1144	0.0109096		0.0109996	0.0112048	0.0118804		-0.1144	-0.000147151		-2.1972e-05	5.848e-05	-0.000154159		-0.1144	7.2162e-05		-0.000104915	6.018e-06	0.000123549
-0.1142	0.0108761		0.0107055	0.011364	0.0116152		-0.1142	0.0109118		0.0110069	0.0112046	0.0118839		-0.1142	-0.000146193		-1.27e-05	5.1952e-05	-0.00015588		-0.1142	7.4369e-05		-9.7633e-05	5.861e-06	0.000127058
-0.114	0.0108728		0.01071	0.0113658	0.0116148		-0.114	0.0109144		0.0110124	0.0112033	0.0118941		-0.114	-0.000149533		-8.25e-06	5.3737e-05	-0.00015625		-0.114	7.7021e-05		-9.2178e-05	4.587e-06	0.000137249
-0.1138	0.0108723		0.010711	0.0113671	0.0116026		-0.1138	0.0109168		0.0110148	0.0112094	0.0118956		-0.1138	-0.000149997		-7.281e-06	5.5004e-05	-0.000168434		-0.1138	7.9442e-05		-8.9773e-05	1.0604e-05	0.000138715
-0.1136	0.0108706		0.010706	0.0113716	0.0116045		-0.1136	0.0109158		0.0110188	0.0112104	0.0118954		-0.1136	-0.000151754		-1.2262e-05	5.9548e-05	-0.000166523		-0.1136	7.8397e-05		-8.574e-05	1.1621e-05	0.000138531
-0.1134	0.0108681		0.0106998	0.0113682	0.0115968		-0.1134	0.0109147		0.0110219	0.0112014	0.0118989		-0.1134	-0.000154272		-1.8451e-05	5.6181e-05	-0.000174236		-0.1134	7.7317e-05		-8.2624e-05	2.68e-06	0.000142061
-0.1132	0.0108638		0.0106991	0.0113656	0.0116017		-0.1132	0.010909		0.0110132	0.0112007	0.0118939		-0.1132	-0.000158521		-1.9164e-05	5.3519e-05	-0.000169325		-0.1132	7.1574e-05		-9.1379e-05	1.939e-06	0.000137024
-0.113	0.0108626		0.0107029	0.0113679	0.0116028		-0.113	0.0109107		0.0110072	0.0112007	0.0118864		-0.113	-0.000159745		-1.5329e-05	5.5827e-05	-0.000168298		-0.113	7.3317e-05		-9.7289e-05	1.972e-06	0.000129541
-0.1128	0.0108605		0.010701	0.0113715	0.0116008		-0.1128	0.0108965		0.0110081	0.0112002	0.0118714		-0.1128	-0.000161884		-1.7236e-05	5.9493e-05	-0.000170265		-0.1128	5.9057e-05		-9.6475e-05	1.402e-06	0.00011458
-0.1126	0.0108567		0.0107056	0.0113669	0.0116121		-0.1126	0.010892		0.0110098	0.011201	0.0118712		-0.1126	-0.000165653		-1.2683e-05	5.4873e-05	-0.000158931		-0.1126	5.4573e-05		-9.4687e-05	2.208e-06	0.000114323
-0.1124	0.0108599		0.0107074	0.0113693	0.0116087		-0.1124	0.0108957		0.0110159	0.0112004	0.0118746		-0.1124	-0.000162473		-1.0821e-05	5.7295e-05	-0.000162388		-0.1124	5.8261e-05		-8.8681e-05	1.685e-06	0.000117797
-0.1122	0.0108602		0.010704	0.0113618	0.0115965		-0.1122	0.0109001		0.0110116	0.0111871	0.0118748		-0.1122	-0.000162118		-1.4253e-05	4.9723e-05	-0.000174541		-0.1122	6.2705e-05		-9.2918e-05	-1.165e-05	0.000117914
-0.112	0.0108542		0.0106981	0.011365	0.0115941		-0.112	0.010909		0.0110073	0.0111866	0.0118853		-0.112	-0.000168144		-2.0194e-05	5.2924e-05	-0.00017696		-0.112	7.1553e-05		-9.7276e-05	-1.2139e-05	0.000128429
-0.1118	0.0108589		0.0107031	0.0113698	0.0115895		-0.1118	0.0109079		0.0110112	0.0111861	0.0118963		-0.1118	-0.000163436		-1.511e-05	5.7716e-05	-0.000181508		-0.1118	7.0495e-05		-9.3383e-05	-1.2701e-05	0.000139457
-0.1116	0.0108634		0.0107022	0.0113716	0.0115835		-0.1116	0.0109059		0.011013	0.0111901	0.0118917		-0.1116	-0.000158946		-1.6042e-05	5.9533e-05	-0.000187595		-0.1116	6.8467e-05		-9.1499e-05	-8.676e-06	0.000134891
-0.1114	0.0108607		0.0106965	0.0113735	0.0115821		-0.1114	0.0109112		0.01101	0.0111873	0.0118854		-0.1114	-0.000161603		-2.1769e-05	6.1427e-05	-0.000188923		-0.1114	7.3837e-05		-9.4553e-05	-1.1429e-05	0.000128523
-0.1112	0.0108522		0.010696	0.0113723	0.0115776		-0.1112	0.010913		0.0110101	0.0111877	0.0118958		-0.1112	-0.000170156		-2.2251e-05	6.03e-05	-0.000193459		-0.1112	7.5576e-05		-9.4418e-05	-1.1052e-05	0.000138979
-0.111	0.0108509		0.0106831	0.0113703	0.0115833		-0.111	0.0109082		0.0110152	0.0111885	0.0119047		-0.111	-0.000171452		-3.5158e-05	5.8279e-05	-0.000187759		-0.111	7.0802e-05		-8.9349e-05	-1.0285e-05	0.000147883
-0.1108	0.0108525		0.0106933	0.0113704	0.0115907		-0.1108	0.0109079		0.0110197	0.0111984	0.0118999		-0.1108	-0.000169796		-2.4953e-05	5.8339e-05	-0.000180346		-0.1108	7.0538e-05		-8.4791e-05	-3.08e-07	0.000143058
-0.1106	0.0108521		0.0106938	0.0113775	0.0115922		-0.1106	0.0109151		0.0110269	0.011193	0.011904		-0.1106	-0.000170211		-2.4497e-05	6.5484e-05	-0.000178811		-0.1106	7.7729e-05		-7.7621e-05	-5.806e-06	0.000147148
-0.1104	0.010851		0.0106889	0.0113689	0.0115953		-0.1104	0.0109219		0.0110224	0.0111905	0.0119024		-0.1104	-0.000171323		-2.9329e-05	5.6854e-05	-0.000175743		-0.1104	8.4453e-05		-8.2097e-05	-8.276e-06	0.000145527
-0.1102	0.0108463		0.0106876	0.0113664	0.0115967		-0.1102	0.0109285		0.0110177	0.0111895	0.0118963		-0.1102	-0.000176024		-3.0656e-05	5.431e-05	-0.000174395		-0.1102	9.1083e-05		-8.6867e-05	-9.259e-06	0.000139442
-0.11	0.0108518		0.010692	0.0113718	0.0115837		-0.11	0.0109282		0.0110233	0.0111914	0.0118979		-0.11	-0.000170576		-2.6251e-05	5.9766e-05	-0.000187315		-0.11	9.0825e-05		-8.124e-05	-7.35e-06	0.00014108
-0.1098	0.0108482		0.0106954	0.0113758	0.0115752		-0.1098	0.0109335		0.011013	0.0111945	0.0119032		-0.1098	-0.00017418		-2.2828e-05	6.3714e-05	-0.000195871		-0.1098	9.6101e-05		-9.1566e-05	-4.254e-06	0.000146332
-0.1096	0.0108459		0.0106898	0.0113762	0.0115701		-0.1096	0.0109276		0.0110157	0.0111907	0.0119098		-0.1096	-0.000176395		-2.8436e-05	6.4123e-05	-0.00020094		-0.1096	9.0216e-05		-8.8801e-05	-8.011e-06	0.000152988
-0.1094	0.0108428		0.0106848	0.0113785	0.0115655		-0.1094	0.0109271		0.0110263	0.0111863	0.0119248		-0.1094	-0.000179584		-3.3433e-05	6.6461e-05	-0.000205595		-0.1094	8.9726e-05		-7.8275e-05	-1.2454e-05	0.000167965
-0.1092	0.0108408		0.0106792	0.0113833	0.0115601		-0.1092	0.010927		0.0110217	0.0111847	0.0119216		-0.1092	-0.00018159		-3.9058e-05	7.1267e-05	-0.000210926		-0.1092	8.961e-05		-8.2873e-05	-1.4051e-05	0.000164741
-0.109	0.0108511		0.0106873	0.0113812	0.0115503		-0.109	0.0109223		0.0110331	0.0111834	0.0119121		-0.109	-0.000171254		-3.0985e-05	6.919e-05	-0.000220733		-0.109	8.4851e-05		-7.1433e-05	-1.5404e-05	0.000155284
-0.1088	0.0108544		0.0106894	0.0113808	0.0115361		-0.1088	0.0109274		0.0110347	0.0111899	0.0119072		-0.1088	-0.000167954		-2.8866e-05	6.8754e-05	-0.000234967		-0.1088	9.0014e-05		-6.9838e-05	-8.856e-06	0.000150347
-0.1086	0.0108592		0.0106902	0.0113915	0.0115356		-0.1086	0.0109181		0.0110285	0.0111849	0.0119096		-0.1086	-0.000163104		-2.8044e-05	7.9419e-05	-0.00023543		-0.1086	8.0666e-05		-7.6079e-05	-1.3836e-05	0.000152732
-0.1084	0.0108578		0.0106919	0.0113883	0.0115331		-0.1084	0.0109153		0.0110323	0.0111857	0.0119071		-0.1084	-0.000164498		-2.6318e-05	7.6297e-05	-0.000237954		-0.1084	7.7917e-05		-7.2287e-05	-1.3086e-05	0.000150298
-0.1082	0.0108531		0.0106922	0.0113859	0.0115253		-0.1082	0.0109152		0.0110336	0.0111815	0.0119067		-0.1082	-0.000169289		-2.6009e-05	7.384e-05	-0.000245713		-0.1082	7.7813e-05		-7.0892e-05	-1.7299e-05	0.000149809
-0.108	0.0108547		0.0106939	0.0113836	0.0115238		-0.108	0.0109132		0.0110324	0.0111891	0.0119094		-0.108	-0.000167603		-2.4321e-05	7.1544e-05	-0.000247281		-0.108	7.5782e-05		-7.2096e-05	-9.68e-06	0.000152529
-0.1078	0.0108561		0.0106975	0.0113823	0.0115253		-0.1078	0.0109085		0.0110301	0.0111727	0.0119098		-0.1078	-0.000166283		-2.0729e-05	7.0272e-05	-0.000245708		-0.1078	7.1081e-05		-7.4411e-05	-2.608e-05	0.000152972
-0.1076	0.0108571		0.0106946	0.0113816	0.011522		-0.1076	0.0109045		0.0110178	0.011164	0.0119295		-0.1076	-0.000165256		-2.3643e-05	6.9564e-05	-0.000249099		-0.1076	6.7069e-05		-8.6768e-05	-3.4756e-05	0.0001727
-0.1074	0.0108565		0.0106898	0.0113829	0.0115231		-0.1074	0.0108883		0.0110208	0.0111787	0.0119432		-0.1074	-0.000165799		-2.8414e-05	7.0875e-05	-0.000247909		-0.1074	5.0864e-05		-8.3753e-05	-2.0016e-05	0.000186343
-0.1072	0.010856		0.0106845	0.0113792	0.011528		-0.1072	0.0108847		0.011024	0.0111844	0.0119454		-0.1072	-0.00016631		-3.3734e-05	6.714e-05	-0.000243037		-0.1072	4.7253e-05		-8.049e-05	-1.4399e-05	0.000188598
-0.107	0.0108616		0.0106863	0.011379	0.0115379		-0.107	0.0108842		0.0110289	0.0111888	0.0119411		-0.107	-0.000160764		-3.1994e-05	6.6981e-05	-0.000233194		-0.107	4.6746e-05		-7.5615e-05	-1e-05	0.000184255
-0.1068	0.010867		0.0106897	0.0113706	0.0115365		-0.1068	0.0108827		0.0110359	0.0111893	0.0119481		-0.1068	-0.000155301		-2.8517e-05	5.8522e-05	-0.000234568		-0.1068	4.5254e-05		-6.8676e-05	-9.494e-06	0.000191248
-0.1066	0.0108698		0.0106883	0.0113687	0.0115289		-0.1066	0.0108815		0.0110313	0.0111932	0.0119571		-0.1066	-0.00015251		-2.9936e-05	5.6617e-05	-0.00024219		-0.1066	4.4144e-05		-7.3221e-05	-5.563e-06	0.000200263
-0.1064	0.0108769		0.0106846	0.011369	0.0115151		-0.1064	0.0108798		0.0110339	0.01119	0.011951		-0.1064	-0.000145442		-3.3616e-05	5.6906e-05	-0.000255949		-0.1064	4.2443e-05		-7.0627e-05	-8.711e-06	0.000194118
-0.1062	0.010882		0.010684	0.0113691	0.0115106		-0.1062	0.0108768		0.0110353	0.0111922	0.0119544		-0.1062	-0.000140372		-3.4253e-05	5.7083e-05	-0.000260476		-0.1062	3.9396e-05		-6.9226e-05	-6.598e-06	0.000197536
-0.106	0.0108744		0.0106843	0.0113663	0.0114996		-0.106	0.0108762		0.0110341	0.0111837	0.011937		-0.106	-0.000147961		-3.3979e-05	5.4237e-05	-0.000271422		-0.106	3.8832e-05		-7.0469e-05	-1.5055e-05	0.000180189
-0.1058	0.0108691		0.010684	0.0113628	0.0114941		-0.1058	0.010874		0.0110242	0.0111966	0.0119378		-0.1058	-0.000153274		-3.4268e-05	5.0709e-05	-0.000276979		-0.1058	3.6601e-05		-8.0358e-05	-2.172e-06	0.000180966
-0.1056	0.0108707		0.0106887	0.0113554	0.0115037		-0.1056	0.0108675		0.0110285	0.0111874	0.0119298		-0.1056	-0.000151614		-2.9559e-05	4.3312e-05	-0.000267332		-0.1056	3.0122e-05		-7.6048e-05	-1.1341e-05	0.000172918
-0.1054	0.0108766		0.0106918	0.0113602	0.0115087		-0.1054	0.0108653		0.0110228	0.011179	0.01193		-0.1054	-0.000145768		-2.6428e-05	4.8158e-05	-0.000262359		-0.1054	2.7912e-05		-8.1781e-05	-1.9743e-05	0.000173178
-0.1052	0.0108745		0.0106991	0.0113576	0.0114927		-0.1052	0.010853		0.0110201	0.0111776	0.0119321		-0.1052	-0.000147849		-1.9182e-05	4.5512e-05	-0.000278333		-0.1052	1.5589e-05		-8.4472e-05	-2.1154e-05	0.000175253
-0.105	0.0108752		0.0107047	0.0113589	0.0114883		-0.105	0.0108464		0.011019	0.0111833	0.0119265		-0.105	-0.000147192		-1.3574e-05	4.6861e-05	-0.000282783		-0.105	8.951e-06		-8.5533e-05	-1.5456e-05	0.000169628
-0.1048	0.0108742		0.0107034	0.0113621	0.011484		-0.1048	0.0108393		0.011014	0.0111859	0.0119289		-0.1048	-0.000148165		-1.4854e-05	5.0013e-05	-0.00028705		-0.1048	1.866e-06		-9.0509e-05	-1.2879e-05	0.000172102
-0.1046	0.0108742		0.0107041	0.0113543	0.0114766		-0.1046	0.0108415		0.0110226	0.0111888	0.0119244		-0.1046	-0.000148167		-1.4143e-05	4.2227e-05	-0.000294501		-0.1046	4.082e-06		-8.195e-05	-9.943e-06	0.000167534
-0.1044	0.010874		0.0107041	0.0113523	0.0114718		-0.1044	0.0108367		0.0110178	0.0111935	0.0119197		-0.1044	-0.000148389		-1.4108e-05	4.0262e-05	-0.000299287		-0.1044	-6.63e-07		-8.6782e-05	-5.21e-06	0.000162864
-0.1042	0.0108774		0.010701	0.0113498	0.0114729		-0.1042	0.0108416		0.0110274	0.0111835	0.0119223		-0.1042	-0.000144986		-1.7232e-05	3.773e-05	-0.000298195		-0.1042	4.205e-06		-7.7124e-05	-1.5224e-05	0.00016545
-0.104	0.0108822		0.0107015	0.0113495	0.0114749		-0.104	0.0108431		0.0110376	0.0111845	0.0119254		-0.104	-0.000140135		-1.6751e-05	3.7446e-05	-0.000296156		-0.104	5.738e-06		-6.6951e-05	-1.425e-05	0.000168596
-0.1038	0.010885		0.0106997	0.0113505	0.0114785		-0.1038	0.0108495		0.0110258	0.0111793	0.0119331		-0.1038	-0.000137337		-1.8583e-05	3.842e-05	-0.000292506		-0.1038	1.2135e-05		-7.8696e-05	-1.9444e-05	0.000176275
-0.1036	0.0108877		0.010699	0.0113515	0.0114773		-0.1036	0.0108472		0.0110224	0.0111597	0.0119405		-0.1036	-0.000134596		-1.92e-05	3.9419e-05	-0.000293749		-0.1036	9.837e-06		-8.2101e-05	-3.9052e-05	0.000183673
-0.1034	0.0108845		0.0106941	0.0113594	0.011477		-0.1034	0.0108459		0.0110198	0.0111638	0.0119569		-0.1034	-0.000137859		-2.4166e-05	4.7309e-05	-0.000294008		-0.1034	8.45e-06		-8.4726e-05	-3.4966e-05	0.000200016
-0.1032	0.0108862		0.0106954	0.0113604	0.0114755		-0.1032	0.0108433		0.0110287	0.0111638	0.011954		-0.1032	-0.000136104		-2.2868e-05	4.8315e-05	-0.00029555		-0.1032	5.935e-06		-7.5827e-05	-3.4949e-05	0.000197185
-0.103	0.0108836		0.0106938	0.0113626	0.0114692		-0.103	0.0108515		0.0110247	0.0111682	0.0119579		-0.103	-0.000138714		-2.4464e-05	5.0575e-05	-0.000301898		-0.103	1.4121e-05		-7.988e-05	-3.0525e-05	0.000201089
-0.1028	0.0108807		0.0106939	0.0113585	0.01147		-0.1028	0.0108647		0.0110309	0.0111634	0.0119571		-0.1028	-0.00014165		-2.4331e-05	4.6418e-05	-0.000301075		-0.1028	2.7327e-05		-7.3655e-05	-3.5307e-05	0.000200204
-0.1026	0.0108804		0.0106943	0.0113604	0.0114532		-0.1026	0.010855		0.0110292	0.0111636	0.0119555		-0.1026	-0.000141915		-2.3938e-05	4.8342e-05	-0.000317872		-0.1026	1.7618e-05		-7.5348e-05	-3.511e-05	0.00019869
-0.1024	0.0108767		0.0107	0.0113567	0.0114633		-0.1024	0.0108536		0.0110309	0.0111619	0.0119468		-0.1024	-0.000145615		-1.8212e-05	4.4641e-05	-0.00030776		-0.1024	1.6215e-05		-7.3656e-05	-3.688e-05	0.000189953
-0.1022	0.0108699		0.0106998	0.0113542	0.0114533		-0.1022	0.0108508		0.0110273	0.0111544	0.0119483		-0.1022	-0.000152432		-1.848e-05	4.213e-05	-0.00031775		-0.1022	1.3393e-05		-7.7263e-05	-4.4405e-05	0.000191475
-0.102	0.0108707		0.0106952	0.0113508	0.011449		-0.102	0.0108451		0.0110158	0.011153	0.0119434		-0.102	-0.000151672		-2.3046e-05	3.8792e-05	-0.000322071		-0.102	7.667e-06		-8.8698e-05	-4.5797e-05	0.000186518
-0.1018	0.0108707		0.0106933	0.0113493	0.0114464		-0.1018	0.0108453		0.0110207	0.0111558	0.0119428		-0.1018	-0.000151606		-2.4996e-05	3.7296e-05	-0.00032462		-0.1018	7.919e-06		-8.3865e-05	-4.294e-05	0.00018592
-0.1016	0.010865		0.0107022	0.011346	0.0114494		-0.1016	0.0108446		0.01102	0.0111564	0.0119398		-0.1016	-0.000157334		-1.6031e-05	3.391e-05	-0.000321619		-0.1016	7.15e-06		-8.4535e-05	-4.2385e-05	0.000182956
-0.1014	0.0108649		0.010705	0.0113495	0.0114467		-0.1014	0.0108523		0.0110208	0.0111548	0.0119392		-0.1014	-0.000157395		-1.322e-05	3.7436e-05	-0.000324357		-0.1014	1.493e-05		-8.3728e-05	-4.396e-05	0.000182353
-0.1012	0.0108695		0.0106937	0.0113494	0.0114497		-0.1012	0.0108578		0.0110205	0.0111571	0.0119383		-0.1012	-0.00015284		-2.4552e-05	3.7367e-05	-0.00032137		-0.1012	2.0398e-05		-8.4086e-05	-4.164e-05	0.000181459
-0.101	0.0108696		0.010693	0.0113421	0.0114388		-0.101	0.0108598		0.0110191	0.0111606	0.0119398		-0.101	-0.000152708		-2.528e-05	3.0034e-05	-0.000332215		-0.101	2.236e-05		-8.547e-05	-3.8149e-05	0.000182955
-0.1008	0.0108692		0.0107016	0.0113335	0.011436		-0.1008	0.0108631		0.0110174	0.011161	0.011947		-0.1008	-0.00015318		-1.6681e-05	2.149e-05	-0.000335094		-0.1008	2.573e-05		-8.7132e-05	-3.772e-05	0.000190195
-0.1006	0.0108636		0.0106974	0.0113291	0.0114428		-0.1006	0.0108755		0.0110124	0.0111588	0.0119484		-0.1006	-0.000158783		-2.0874e-05	1.7066e-05	-0.000328224		-0.1006	3.8105e-05		-9.2169e-05	-3.9931e-05	0.000191518
-0.1004	0.0108601		0.0107003	0.0113275	0.0114417		-0.1004	0.0108738		0.0110096	0.0111567	0.0119451		-0.1004	-0.000162237		-1.7927e-05	1.5418e-05	-0.000329361		-0.1004	3.6379e-05		-9.4915e-05	-4.2049e-05	0.000188274
-0.1002	0.0108648		0.0107019	0.0113345	0.0114378		-0.1002	0.0108691		0.011009	0.0111519	0.0119497		-0.1002	-0.000157558		-1.6385e-05	2.2474e-05	-0.000333269		-0.1002	3.165e-05		-9.5586e-05	-4.6828e-05	0.000192818
-0.1	0.0108597		0.010705	0.0113271	0.0114379		-0.1	0.0108695		0.0110087	0.0111527	0.0119586		-0.1	-0.000162656		-1.3208e-05	1.5067e-05	-0.000333194		-0.1	3.2081e-05		-9.5819e-05	-4.6046e-05	0.000201795
-0.0998	0.0108658		0.0107114	0.011332	0.0114387		-0.0998	0.0108693		0.0110007	0.0111449	0.0119625		-0.0998	-0.000156582		-6.877e-06	1.9922e-05	-0.00033237		-0.0998	3.187e-05		-0.000103812	-5.3857e-05	0.000205674
-0.0996	0.0108676		0.0107111	0.0113338	0.011435		-0.0996	0.0108601		0.0109976	0.0111382	0.0119683		-0.0996	-0.000154757		-7.183e-06	2.1803e-05	-0.000336026		-0.0996	2.2662e-05		-0.000106953	-6.0575e-05	0.000211435
-0.0994	0.0108621		0.0107107	0.0113322	0.0114279		-0.0994	0.0108387		0.0109981	0.0111323	0.011975		-0.0994	-0.000160254		-7.505e-06	2.0161e-05	-0.000343165		-0.0994	1.273e-06		-0.000106431	-6.6433e-05	0.000218165
-0.0992	0.0108553		0.0107105	0.0113322	0.0114294		-0.0992	0.0108343		0.0109983	0.0111238	0.0119744		-0.0992	-0.000167088		-7.779e-06	2.02e-05	-0.000341681		-0.0992	-3.138e-06		-0.000106193	-7.4906e-05	0.0002176
-0.099	0.0108583		0.0107097	0.0113299	0.0114201		-0.099	0.0108341		0.0110005	0.011116	0.0119865		-0.099	-0.000164012		-8.539e-06	1.7899e-05	-0.000350972		-0.099	-3.335e-06		-0.000104082	-8.2742e-05	0.000229696
-0.0988	0.0108521		0.0107084	0.0113316	0.011415		-0.0988	0.0108262		0.0109974	0.0111011	0.0119902		-0.0988	-0.000170224		-9.875e-06	1.9555e-05	-0.000356034		-0.0988	-1.1218e-05		-0.00010717	-9.7672e-05	0.000233369
-0.0986	0.0108535		0.0107132	0.0113314	0.0114084		-0.0986	0.0108266		0.0109933	0.0110981	0.0119911		-0.0986	-0.000168849		-5.074e-06	1.9331e-05	-0.000362697		-0.0986	-1.0841e-05		-0.000111283	-0.000100698	0.00023429
-0.0984	0.0108531		0.0107207	0.0113287	0.0114013		-0.0984	0.0108206		0.0109955	0.0110998	0.0119904		-0.0984	-0.000169224		2.435e-06	1.6613e-05	-0.000369789		-0.0984	-1.6809e-05		-0.00010902	-9.8931e-05	0.000233551
-0.0982	0.010851		0.0107171	0.0113299	0.0114048		-0.0982	0.0108088		0.0109923	0.0110933	0.0119906		-0.0982	-0.000171327		-1.12e-06	1.7843e-05	-0.000366235		-0.0982	-2.857e-05		-0.000112245	-0.000105491	0.000233768
-0.098	0.0108487		0.010715	0.0113261	0.0114088		-0.098	0.0108115		0.0109939	0.0110902	0.0119777		-0.098	-0.000173655		-3.259e-06	1.406e-05	-0.000362231		-0.098	-2.5867e-05		-0.000110589	-0.000108603	0.000220883
-0.0978	0.0108451		0.0107145	0.0113285	0.0114203		-0.0978	0.0108112		0.0109907	0.0110947	0.0119849		-0.0978	-0.000177208		-3.757e-06	1.6411e-05	-0.000350797		-0.0978	-2.6183e-05		-0.000113876	-0.00010408	0.000228063
-0.0976	0.0108449		0.0107109	0.011328	0.011419		-0.0976	0.0108105		0.0109877	0.0110943	0.0119873		-0.0976	-0.000177452		-7.343e-06	1.5936e-05	-0.000352056		-0.0976	-2.6877e-05		-0.000116818	-0.000104473	0.000230438
-0.0974	0.0108465		0.0107111	0.01133	0.0114137		-0.0974	0.0108199		0.0109949	0.0111026	0.0119918		-0.0974	-0.000175809		-7.162e-06	1.798e-05	-0.000357334		-0.0974	-1.7478e-05		-0.000109674	-9.6186e-05	0.00023495
-0.0972	0.0108471		0.0107041	0.0113377	0.011418		-0.0972	0.010823		0.0109922	0.0111036	0.0119858		-0.0972	-0.000175285		-1.4194e-05	2.569e-05	-0.000353097		-0.0972	-1.4407e-05		-0.00011236	-9.5139e-05	0.000228943
-0.097	0.0108446		0.0107128	0.0113327	0.011417		-0.097	0.0108193		0.0109913	0.0111033	0.0119768		-0.097	-0.000177709		-5.451e-06	2.0656e-05	-0.000354009		-0.097	-1.8129e-05		-0.000113207	-9.5466e-05	0.000219952
-0.0968	0.0108478		0.0107113	0.0113335	0.0114189		-0.0968	0.0108278		0.0109903	0.011107	0.0119884		-0.0968	-0.000174555		-6.972e-06	2.1431e-05	-0.000352126		-0.0968	-9.652e-06		-0.000114225	-9.177e-05	0.000231511
-0.0966	0.0108493		0.0107089	0.0113296	0.0114068		-0.0966	0.0108342		0.0109814	0.0111081	0.0119869		-0.0966	-0.000173013		-9.306e-06	1.7525e-05	-0.00036427		-0.0966	-3.19e-06		-0.000123186	-9.0654e-05	0.000230022
-0.0964	0.0108515		0.0107106	0.0113322	0.0114048		-0.0964	0.0108457		0.0109906	0.0111179	0.0119802		-0.0964	-0.000170884		-7.618e-06	2.0196e-05	-0.000366224		-0.0964	8.278e-06		-0.00011392	-8.0906e-05	0.000223393
-0.0962	0.0108516		0.0107025	0.011333	0.0114009		-0.0962	0.0108459		0.0109864	0.0111028	0.0119675		-0.0962	-0.000170751		-1.573e-05	2.0919e-05	-0.000370187		-0.0962	8.459e-06		-0.000118139	-9.5978e-05	0.000210689
-0.096	0.0108482		0.0106988	0.0113245	0.0114089		-0.096	0.0108502		0.0109862	0.0110948	0.0119715		-0.096	-0.00017415		-1.947e-05	1.241e-05	-0.000362192		-0.096	1.2799e-05		-0.000118316	-0.000103963	0.00021468
-0.0958	0.0108484		0.0106973	0.0113239	0.0114106		-0.0958	0.0108497		0.0109765	0.0110953	0.0119682		-0.0958	-0.000173968		-2.0922e-05	1.1808e-05	-0.000360504		-0.0958	1.2332e-05		-0.000128083	-0.000103423	0.000211341
-0.0956	0.0108487		0.0106977	0.0113333	0.0114126		-0.0956	0.0108518		0.0109594	0.0110962	0.0119543		-0.0956	-0.0001736		-2.0536e-05	2.1256e-05	-0.000358483		-0.0956	1.4424e-05		-0.00014511	-0.000102605	0.000197436
-0.0954	0.0108503		0.0106977	0.011342	0.0114111		-0.0954	0.0108485		0.010966	0.011096	0.011956		-0.0954	-0.000171994		-2.0577e-05	2.9927e-05	-0.00036		-0.0954	1.1077e-05		-0.000138539	-0.00010278	0.000199179
-0.0952	0.0108463		0.0106937	0.011348	0.0114086		-0.0952	0.0108621		0.0109576	0.0110904	0.0119451		-0.0952	-0.000176039		-2.4592e-05	3.5905e-05	-0.000362499		-0.0952	2.4664e-05		-0.000146972	-0.000108351	0.000188278
-0.095	0.0108389		0.0106942	0.0113496	0.0114088		-0.095	0.0108688		0.010954	0.0110871	0.0119427		-0.095	-0.000183427		-2.4039e-05	3.7554e-05	-0.000362248		-0.095	3.1411e-05		-0.000150566	-0.000111672	0.000185813
-0.0948	0.0108368		0.0106932	0.0113494	0.0114049		-0.0948	0.0108728		0.0109506	0.0110938	0.0119374		-0.0948	-0.000185559		-2.5005e-05	3.7339e-05	-0.000366168		-0.0948	3.5355e-05		-0.00015395	-0.000104923	0.00018052
-0.0946	0.0108359		0.0106899	0.0113475	0.0114089		-0.0946	0.0108736		0.0109574	0.0110877	0.011939		-0.0946	-0.000186411		-2.8349e-05	3.5411e-05	-0.00036218		-0.0946	3.6187e-05		-0.000147118	-0.000111073	0.00018213
-0.0944	0.0108416		0.0106828	0.0113452	0.0114169		-0.0944	0.0108728		0.0109562	0.0110913	0.0119308		-0.0944	-0.000180777		-3.5468e-05	3.3155e-05	-0.000354167		-0.0944	3.5357e-05		-0.000148386	-0.000107429	0.000173997
-0.0942	0.0108455		0.010673	0.0113547	0.011419		-0.0942	0.0108796		0.010963	0.0110901	0.0119323		-0.0942	-0.000176815		-4.5207e-05	4.2672e-05	-0.000352038		-0.0942	4.2147e-05		-0.000141543	-0.000108664	0.000175424
-0.094	0.010849		0.0106797	0.011366	0.0114167		-0.094	0.010881		0.010963	0.0110917	0.011941		-0.094	-0.00017339		-3.8512e-05	5.3981e-05	-0.00035439		-0.094	4.3595e-05		-0.000141584	-0.000107006	0.000184131
-0.0938	0.0108501		0.0106654	0.0113658	0.011424		-0.0938	0.0108855		0.0109564	0.0110855	0.0119388		-0.0938	-0.000172265		-5.2807e-05	5.3771e-05	-0.000347008		-0.0938	4.8109e-05		-0.000148183	-0.000113303	0.000181961
-0.0936	0.0108513		0.0106661	0.0113651	0.0114185		-0.0936	0.0108948		0.0109535	0.011084	0.0119397		-0.0936	-0.000171086		-5.2189e-05	5.3029e-05	-0.000352539		-0.0936	5.7403e-05		-0.000151082	-0.000114791	0.000182809
-0.0934	0.0108532		0.0106708	0.0113647	0.0114322		-0.0934	0.0109046		0.0109618	0.011082	0.01195		-0.0934	-0.000169111		-4.745e-05	5.2621e-05	-0.000338878		-0.0934	6.7218e-05		-0.000142703	-0.000116719	0.000193126
-0.0932	0.0108627		0.0106705	0.0113688	0.0114283		-0.0932	0.010893		0.0109726	0.0110882	0.0119518		-0.0932	-0.000159608		-4.7743e-05	5.678e-05	-0.000342756		-0.0932	5.5565e-05		-0.000131941	-0.000110508	0.000194983
-0.093	0.0108639		0.0106689	0.0113655	0.011424		-0.093	0.0108871		0.010974	0.01108	0.0119581		-0.093	-0.000158469		-4.9339e-05	5.343e-05	-0.000347087		-0.093	4.9669e-05		-0.000130504	-0.000118711	0.000201302
-0.0928	0.0108607		0.0106708	0.0113749	0.011433		-0.0928	0.010889		0.0109655	0.0110706	0.0119715		-0.0928	-0.000161675		-4.7487e-05	6.2904e-05	-0.000338063		-0.0928	5.1604e-05		-0.000139025	-0.000128163	0.000214617
-0.0926	0.0108607		0.0106671	0.0113829	0.0114335		-0.0926	0.010885		0.0109666	0.0110656	0.0119768		-0.0926	-0.00016162		-5.1189e-05	7.0863e-05	-0.000337583		-0.0926	4.7634e-05		-0.0001379	-0.000133118	0.000219945
-0.0924	0.0108637		0.0106706	0.0113778	0.0114321		-0.0924	0.0108818		0.0109711	0.0110754	0.0119795		-0.0924	-0.000158629		-4.7616e-05	6.5737e-05	-0.000338928		-0.0924	4.4357e-05		-0.000133467	-0.00012331	0.000222676
-0.0922	0.0108639		0.0106708	0.0113798	0.0114362		-0.0922	0.0108884		0.0109712	0.0110849	0.0119821		-0.0922	-0.000158402		-4.7472e-05	6.7778e-05	-0.000334845		-0.0922	5.0992e-05		-0.000133358	-0.000113901	0.000225211
-0.092	0.0108627		0.0106812	0.0113867	0.0114239		-0.092	0.0108884		0.0109693	0.0110851	0.0119819		-0.092	-0.000159681		-3.7031e-05	7.4704e-05	-0.000347174		-0.092	5.1007e-05		-0.000135268	-0.000113613	0.000225066
-0.0918	0.0108647		0.010678	0.0113928	0.0114212		-0.0918	0.0108849		0.0109705	0.0110848	0.0119789		-0.0918	-0.000157639		-4.0215e-05	8.0785e-05	-0.000349893		-0.0918	4.7517e-05		-0.000134035	-0.000113932	0.000222052
-0.0916	0.0108689		0.0106804	0.0113993	0.0114242		-0.0916	0.010889		0.0109587	0.0110893	0.0119825		-0.0916	-0.00015344		-3.7856e-05	8.7281e-05	-0.000346831		-0.0916	5.1553e-05		-0.00014581	-0.000109412	0.000225679
-0.0914	0.0108722		0.0106794	0.0114108	0.0114213		-0.0914	0.0108868		0.0109573	0.0110829	0.011979		-0.0914	-0.000150137		-3.8829e-05	9.879e-05	-0.000349706		-0.0914	4.9389e-05		-0.00014727	-0.000115888	0.000222203
-0.0912	0.0108683		0.0106826	0.0114194	0.011426		-0.0912	0.0108842		0.0109614	0.0110788	0.011983		-0.0912	-0.000154036		-3.5675e-05	0.000107355	-0.000345082		-0.0912	4.6808e-05		-0.000143177	-0.000119993	0.000226131
-0.091	0.0108686		0.0106783	0.0114209	0.0114243		-0.091	0.0108816		0.0109553	0.0110828	0.0119769		-0.091	-0.000153732		-3.9955e-05	0.00010887	-0.000346774		-0.091	4.4172e-05		-0.000149225	-0.000115931	0.000220038
-0.0908	0.0108696		0.0106819	0.0114227	0.0114228		-0.0908	0.0108742		0.0109506	0.0110864	0.0119714		-0.0908	-0.000152732		-3.6318e-05	0.000110607	-0.000348301		-0.0908	3.6795e-05		-0.000153968	-0.00011239	0.000214548
-0.0906	0.0108646		0.0106846	0.0114202	0.0114165		-0.0906	0.0108878		0.0109398	0.0110889	0.0119687		-0.0906	-0.000157736		-3.3601e-05	0.000108152	-0.000354593		-0.0906	5.0399e-05		-0.000164705	-0.000109846	0.00021189
-0.0904	0.0108708		0.0106952	0.0114179	0.011418		-0.0904	0.0108907		0.0109409	0.011099	0.0119627		-0.0904	-0.000151493		-2.3031e-05	0.000105866	-0.000353006		-0.0904	5.3254e-05		-0.000163683	-9.9787e-05	0.000205812
-0.0902	0.0108729		0.0106994	0.011414	0.0114301		-0.0902	0.0108958		0.0109434	0.0111031	0.011974		-0.0902	-0.000149425		-1.8846e-05	0.000101946	-0.000340941		-0.0902	5.8352e-05		-0.00016116	-9.5628e-05	0.000217106
-0.09	0.0108756		0.0106982	0.0114066	0.0114358		-0.09	0.0108942		0.010937	0.0111027	0.0119742		-0.09	-0.000146748		-2.0006e-05	9.457e-05	-0.000335256		-0.09	5.6772e-05		-0.000167534	-9.6034e-05	0.000217311
-0.0898	0.0108742		0.0106972	0.0114111	0.0114325		-0.0898	0.0109052		0.0109417	0.0111135	0.0119731		-0.0898	-0.000148101		-2.1068e-05	9.9035e-05	-0.000338599		-0.0898	6.778e-05		-0.000162837	-8.5298e-05	0.000216238
-0.0896	0.0108683		0.0107026	0.0114161	0.0114276		-0.0896	0.0109116		0.0109437	0.0111043	0.0119738		-0.0896	-0.000154026		-1.5685e-05	0.000104029	-0.000343456		-0.0896	7.4232e-05		-0.000160814	-9.4455e-05	0.000216909
-0.0894	0.010871		0.0107064	0.0114232	0.0114218		-0.0894	0.0109179		0.0109438	0.0111002	0.0119818		-0.0894	-0.000151308		-1.1882e-05	0.000111126	-0.00034923		-0.0894	8.0522e-05		-0.000160689	-9.859e-05	0.000224951
-0.0892	0.0108745		0.0107078	0.0114232	0.0114203		-0.0892	0.0109215		0.0109448	0.0110946	0.011976		-0.0892	-0.000147889		-1.0456e-05	0.000111162	-0.000350764		-0.0892	8.4052e-05		-0.000159766	-0.000104148	0.000219109
-0.089	0.0108712		0.0107111	0.0114223	0.0114237		-0.089	0.0109178		0.0109442	0.0110951	0.0119681		-0.089	-0.00015118		-7.193e-06	0.000110227	-0.000347358		-0.089	8.0384e-05		-0.000160346	-0.000103608	0.000211302
-0.0888	0.0108737		0.0107239	0.0114273	0.0114294		-0.0888	0.0109298		0.0109393	0.0110903	0.0119778		-0.0888	-0.000148597		5.624e-06	0.000115252	-0.000341629		-0.0888	9.2412e-05		-0.000165216	-0.000108505	0.000220949
-0.0886	0.01087		0.0107218	0.0114311	0.0114256		-0.0886	0.010935		0.0109315	0.0110874	0.0119692		-0.0886	-0.000152362		3.547e-06	0.000119102	-0.000345479		-0.0886	9.7559e-05		-0.000172987	-0.000111343	0.000212385
-0.0884	0.0108663		0.0107291	0.0114326	0.0114201		-0.0884	0.0109317		0.0109334	0.0110907	0.0119638		-0.0884	-0.000155997		1.0843e-05	0.000120564	-0.000350922		-0.0884	9.4285e-05		-0.000171151	-0.000108097	0.000206997
-0.0882	0.010871		0.0107255	0.0114378	0.0114198		-0.0882	0.0109329		0.0109373	0.0110983	0.0119749		-0.0882	-0.000151362		7.216e-06	0.00012573	-0.000351283		-0.0882	9.5529e-05		-0.000167263	-0.000100459	0.000218074
-0.088	0.010871		0.0107205	0.0114431	0.0114162		-0.088	0.0109439		0.0109371	0.0110815	0.0119811		-0.088	-0.000151377		2.238e-06	0.00013105	-0.000354871		-0.088	0.000106544		-0.000167394	-0.000117303	0.000224233
-0.0878	0.0108763		0.010721	0.0114371	0.0114181		-0.0878	0.0109418		0.0109375	0.0110825	0.0119792		-0.0878	-0.000146059		2.754e-06	0.000125039	-0.000352967		-0.0878	0.000104392		-0.000167008	-0.000116291	0.000222385
-0.0876	0.0108707		0.0107237	0.0114392	0.0114151		-0.0876	0.0109426		0.0109279	0.0110914	0.0119805		-0.0876	-0.000151603		5.45e-06	0.000127194	-0.000355925		-0.0876	0.000105206		-0.000176595	-0.000107321	0.000223697
-0.0874	0.0108631		0.0107162	0.0114397	0.0114127		-0.0874	0.0109478		0.0109264	0.0110878	0.0119773		-0.0874	-0.000159217		-2.081e-06	0.000127621	-0.000358352		-0.0874	0.000110393		-0.000178125	-0.000110914	0.000220411
-0.0872	0.0108596		0.0107209	0.0114399	0.0114239		-0.0872	0.0109463		0.0109343	0.0110816	0.0119687		-0.0872	-0.000162746		2.685e-06	0.000127829	-0.000347133		-0.0872	0.000108897		-0.000170228	-0.000117108	0.000211825
-0.087	0.010865		0.0107223	0.0114438	0.0114297		-0.087	0.0109423		0.010933	0.0110789	0.0119549		-0.087	-0.000157355		4.089e-06	0.000131768	-0.000341327		-0.087	0.00010491		-0.000171531	-0.000119834	0.000198045
-0.0868	0.0108631		0.010719	0.011452	0.0114168		-0.0868	0.0109463		0.0109331	0.0110785	0.0119538		-0.0868	-0.000159211		7.96e-07	0.000139948	-0.000354263		-0.0868	0.000108854		-0.000171466	-0.000120258	0.000196989
-0.0866	0.0108643		0.0107111	0.0114586	0.011421		-0.0866	0.0109482		0.0109305	0.0110821	0.0119583		-0.0866	-0.000158042		-7.164e-06	0.000146581	-0.000350092		-0.0866	0.00011079		-0.00017406	-0.000116616	0.000201433
-0.0864	0.0108702		0.0107152	0.0114619	0.0114288		-0.0864	0.0109435		0.0109214	0.0110853	0.0119521		-0.0864	-0.000152161		-3.078e-06	0.000149814	-0.000342273		-0.0864	0.000106093		-0.000183127	-0.000113473	0.000195296
-0.0862	0.010867		0.0107116	0.0114505	0.0114281		-0.0862	0.0109536		0.0109168	0.0110846	0.0119504		-0.0862	-0.000155378		-6.64e-06	0.000138472	-0.000342915		-0.0862	0.000116156		-0.000187765	-0.000114125	0.000193587
-0.086	0.0108682		0.0107128	0.0114532	0.011428		-0.086	0.0109601		0.010915	0.0110854	0.0119492		-0.086	-0.000154169		-5.495e-06	0.000141197	-0.000343037		-0.086	0.000122731		-0.000189573	-0.000113338	0.000192314
-0.0858	0.0108755		0.0107055	0.0114563	0.011429		-0.0858	0.0109499		0.0109223	0.011092	0.0119527		-0.0858	-0.000146832		-1.2757e-05	0.000144264	-0.00034209		-0.0858	0.000112519		-0.000182258	-0.000106758	0.000195846
-0.0856	0.0108734		0.010708	0.0114558	0.0114235		-0.0856	0.0109522		0.0109254	0.0110911	0.0119558		-0.0856	-0.000148977		-1.0224e-05	0.00014379	-0.000347596		-0.0856	0.000114758		-0.000179129	-0.000107685	0.000198977
-0.0854	0.0108744		0.0107164	0.0114625	0.0114238		-0.0854	0.0109583		0.0109324	0.0110867	0.0119433		-0.0854	-0.000147967		-1.835e-06	0.000150455	-0.00034726		-0.0854	0.000120898		-0.000172153	-0.000112091	0.000186431
-0.0852	0.0108758		0.0107108	0.0114751	0.0114197		-0.0852	0.0109641		0.0109375	0.011084	0.0119362		-0.0852	-0.000146531		-7.459e-06	0.000163084	-0.000351357		-0.0852	0.000126674		-0.00016705	-0.00011474	0.000179376
-0.085	0.0108751		0.0107064	0.0114799	0.0114125		-0.085	0.0109675		0.0109526	0.0110868	0.0119337		-0.085	-0.000147283		-1.1812e-05	0.00016785	-0.000358556		-0.085	0.000130135		-0.000151907	-0.000112	0.000176882
-0.0848	0.0108726		0.0107163	0.0114853	0.0114052		-0.0848	0.0109662		0.0109571	0.0110841	0.011922		-0.0848	-0.000149757		-1.949e-06	0.000173239	-0.00036587		-0.0848	0.00012876		-0.000147443	-0.00011463	0.000165164
-0.0846	0.0108662		0.0107169	0.0114833	0.0113946		-0.0846	0.0109646		0.0109515	0.011081	0.0119196		-0.0846	-0.000156148		-1.382e-06	0.000171213	-0.000376447		-0.0846	0.000127201		-0.000153048	-0.000117752	0.000162739
-0.0844	0.0108599		0.0107215	0.0114784	0.0113841		-0.0844	0.0109679		0.0109535	0.0110894	0.0119224		-0.0844	-0.000162417		3.299e-06	0.000166392	-0.000386953		-0.0844	0.000130501		-0.000150998	-0.0001094	0.000165601
-0.0842	0.0108627		0.0107173	0.0114744	0.0113819		-0.0842	0.0109812		0.0109497	0.0110933	0.0119187		-0.0842	-0.000159685		-9.4e-07	0.000162395	-0.000389201		-0.0842	0.000143822		-0.000154788	-0.000105481	0.000161868
-0.084	0.0108624		0.0107188	0.0114762	0.0113834		-0.084	0.0109796		0.0109551	0.0110998	0.0119293		-0.084	-0.00015999		5.76e-07	0.000164186	-0.000387684		-0.084	0.000142232		-0.000149454	-9.897e-05	0.000172436
-0.0838	0.0108625		0.0107242	0.0114767	0.011372		-0.0838	0.0109749		0.0109564	0.0110962	0.011921		-0.0838	-0.000159823		5.981e-06	0.000164635	-0.000399017		-0.0838	0.00013753		-0.000148185	-0.000102536	0.000164128
-0.0836	0.0108594		0.0107249	0.0114741	0.0113782		-0.0836	0.0109749		0.010958	0.0110928	0.0119144		-0.0836	-0.000162915		6.619e-06	0.000162047	-0.000392828		-0.0836	0.000137496		-0.000146488	-0.000105988	0.000157556
-0.0834	0.0108633		0.0107252	0.0114773	0.0113832		-0.0834	0.010971		0.0109446	0.0111005	0.0119204		-0.0834	-0.000159086		6.946e-06	0.000165297	-0.000387901		-0.0834	0.000133633		-0.000159926	-9.8269e-05	0.000163597
-0.0832	0.0108616		0.0107288	0.0114776	0.011384		-0.0832	0.0109704		0.010951	0.0110969	0.0119352		-0.0832	-0.000160751		1.0552e-05	0.000165591	-0.000387033		-0.0832	0.000133006		-0.000153509	-0.000101862	0.000178331
-0.083	0.0108573		0.0107266	0.0114706	0.0113828		-0.083	0.0109721		0.0109492	0.0110934	0.0119272		-0.083	-0.000165034		8.388e-06	0.000158546	-0.000388206		-0.083	0.000134706		-0.000155335	-0.000105393	0.00017039
-0.0828	0.0108512		0.010732	0.0114699	0.0113881		-0.0828	0.0109697		0.0109497	0.0111058	0.0119238		-0.0828	-0.000171143		1.3735e-05	0.000157817	-0.00038298		-0.0828	0.00013228		-0.000154866	-9.2962e-05	0.000166933
-0.0826	0.0108458		0.0107374	0.0114713	0.011393		-0.0826	0.0109688		0.0109502	0.011101	0.011909		-0.0826	-0.000176562		1.9102e-05	0.00015924	-0.000378095		-0.0826	0.000131355		-0.00015433	-9.7721e-05	0.000152158
-0.0824	0.0108453		0.0107402	0.0114736	0.0113859		-0.0824	0.0109777		0.0109455	0.0111044	0.0118992		-0.0824	-0.000177011		2.1911e-05	0.000161575	-0.000385199		-0.0824	0.000140337		-0.000159004	-9.4392e-05	0.000142402
-0.0822	0.0108444		0.0107437	0.0114716	0.0113885		-0.0822	0.0109735		0.0109374	0.0111007	0.0119136		-0.0822	-0.000177989		2.5426e-05	0.000159511	-0.000382526		-0.0822	0.00013613		-0.00016709	-9.8084e-05	0.000156713
-0.082	0.01084		0.0107556	0.0114755	0.0113836		-0.082	0.0109742		0.0109321	0.0111055	0.0119113		-0.082	-0.000182364		3.7312e-05	0.000163411	-0.00038742		-0.082	0.000136826		-0.000172418	-9.3223e-05	0.000154502
-0.0818	0.0108399		0.0107583	0.0114801	0.0113769		-0.0818	0.0109764		0.0109223	0.0111034	0.0119131		-0.0818	-0.000182404		4.0056e-05	0.000168004	-0.000394184		-0.0818	0.000139037		-0.000182268	-9.5383e-05	0.000156225
-0.0816	0.010837		0.0107547	0.0114772	0.0113746		-0.0816	0.010975		0.0109184	0.0110906	0.0118983		-0.0816	-0.0001853		3.6481e-05	0.000165128	-0.000396422		-0.0816	0.000137552		-0.000186127	-0.000108203	0.000141453
-0.0814	0.0108336		0.0107668	0.0114715	0.0113753		-0.0814	0.0109754		0.0109246	0.0110983	0.0119002		-0.0814	-0.000188699		4.8525e-05	0.000159415	-0.000395723		-0.0814	0.000138042		-0.000179971	-0.000100431	0.000143364
-0.0812	0.0108309		0.0107622	0.0114699	0.0113744		-0.0812	0.0109724		0.0109228	0.0111073	0.0118955		-0.0812	-0.000191461		4.3982e-05	0.000157851	-0.000396677		-0.0812	0.000134948		-0.000181723	-9.1487e-05	0.000138614
-0.081	0.0108297		0.010763	0.0114718	0.0113802		-0.081	0.0109681		0.0109112	0.0111073	0.0119029		-0.081	-0.000192595		4.4762e-05	0.000159777	-0.000390861		-0.081	0.000130746		-0.000193352	-9.1503e-05	0.000146071
-0.0808	0.0108294		0.0107548	0.0114744	0.0113844		-0.0808	0.0109658		0.0109156	0.0111123	0.0119004		-0.0808	-0.000192951		3.6569e-05	0.000162393	-0.000386692		-0.0808	0.000128402		-0.000188896	-8.6506e-05	0.000143527
-0.0806	0.0108327		0.010755	0.0114758	0.0113865		-0.0806	0.0109674		0.0109123	0.01111	0.0118994		-0.0806	-0.000189677		3.6779e-05	0.000163803	-0.000384592		-0.0806	0.00012996		-0.000192283	-8.8738e-05	0.000142528
-0.0804	0.0108349		0.0107502	0.0114694	0.0113804		-0.0804	0.0109658		0.0109052	0.0111025	0.0119009		-0.0804	-0.000187436		3.1904e-05	0.000157367	-0.00039066		-0.0804	0.000128373		-0.000199341	-9.6219e-05	0.00014401
-0.0802	0.0108416		0.0107514	0.0114701	0.0113834		-0.0802	0.0109613		0.0109151	0.0111078	0.0119125		-0.0802	-0.000180715		3.3183e-05	0.000158078	-0.000387647		-0.0802	0.00012388		-0.000189411	-9.0982e-05	0.0001557
-0.08	0.0108401		0.0107447	0.0114657	0.01139		-0.08	0.0109626		0.0109126	0.0111096	0.0119039		-0.08	-0.000182202		2.6481e-05	0.000153641	-0.000381011		-0.08	0.000125222		-0.000191921	-8.9205e-05	0.000147089
-0.0798	0.0108438		0.0107443	0.0114707	0.011392		-0.0798	0.0109717		0.0109088	0.0111083	0.0119127		-0.0798	-0.000178576		2.6019e-05	0.000158607	-0.000379023		-0.0798	0.000134312		-0.000195734	-9.0445e-05	0.000155863
-0.0796	0.0108404		0.0107559	0.0114724	0.0114009		-0.0796	0.0109695		0.0109127	0.0111081	0.0119092		-0.0796	-0.000181925		3.7647e-05	0.000160345	-0.000370186		-0.0796	0.000132091		-0.000191815	-9.0648e-05	0.000152307
-0.0794	0.0108439		0.0107615	0.0114676	0.0114001		-0.0794	0.0109648		0.0109159	0.0111054	0.011911		-0.0794	-0.000178424		4.3287e-05	0.000155505	-0.000370968		-0.0794	0.0001274		-0.000188665	-9.3399e-05	0.0001542
-0.0792	0.0108395		0.0107627	0.0114681	0.0114044		-0.0792	0.0109657		0.0109196	0.0111019	0.0119113		-0.0792	-0.000182843		4.4404e-05	0.000156055	-0.00036669		-0.0792	0.000128297		-0.000184952	-9.6834e-05	0.000154444
-0.079	0.0108365		0.0107612	0.011465	0.0114062		-0.079	0.0109662		0.0109202	0.0111042	0.0119118		-0.079	-0.000185873		4.293e-05	0.000152905	-0.000364866		-0.079	0.000128802		-0.000184292	-9.4513e-05	0.000154972
-0.0788	0.0108343		0.0107576	0.0114669	0.0113986		-0.0788	0.0109664		0.0109175	0.0110882	0.0119157		-0.0788	-0.00018802		3.9309e-05	0.000154822	-0.000372435		-0.0788	0.000128989		-0.000187063	-0.000110595	0.000158892
-0.0786	0.0108274		0.0107575	0.0114652	0.0114047		-0.0786	0.0109637		0.0109247	0.0110921	0.0119158		-0.0786	-0.000194954		3.9276e-05	0.000153179	-0.000366321		-0.0786	0.000126305		-0.000179844	-0.000106646	0.00015894
-0.0784	0.0108194		0.0107595	0.0114562	0.0114087		-0.0784	0.010955		0.0109253	0.0110899	0.0119077		-0.0784	-0.000202971		4.1245e-05	0.000144191	-0.000362391		-0.0784	0.000117624		-0.000179226	-0.000108829	0.000150871
-0.0782	0.0108233		0.0107577	0.0114553	0.0114068		-0.0782	0.0109682		0.0109191	0.0110854	0.0119061		-0.0782	-0.000199074		3.9447e-05	0.000143234	-0.00036426		-0.0782	0.000130797		-0.000185421	-0.000113348	0.000149276
-0.078	0.0108268		0.0107644	0.0114529	0.0114097		-0.078	0.010977		0.0109231	0.0110875	0.0119192		-0.078	-0.000195516		4.6103e-05	0.000140815	-0.00036131		-0.078	0.000139628		-0.000181388	-0.000111224	0.000162347
-0.0778	0.0108275		0.0107682	0.0114506	0.0114043		-0.0778	0.010976		0.0109146	0.0110825	0.0119017		-0.0778	-0.000194834		4.994e-05	0.0001386	-0.000366739		-0.0778	0.000138606		-0.000189916	-0.000116267	0.000144869
-0.0776	0.0108255		0.0107708	0.0114432	0.0114046		-0.0776	0.0109731		0.0109135	0.0110893	0.011903		-0.0776	-0.000196889		5.257e-05	0.000131202	-0.000366503		-0.0776	0.000135659		-0.000191016	-0.000109498	0.000146145
-0.0774	0.010827		0.010771	0.0114493	0.0114153		-0.0774	0.0109607		0.0109192	0.0110851	0.011906		-0.0774	-0.00019531		5.2718e-05	0.000137301	-0.000355781		-0.0774	0.000123299		-0.000185386	-0.000113681	0.000149173
-0.0772	0.0108295		0.0107718	0.0114508	0.0114232		-0.0772	0.0109746		0.0109183	0.01109	0.0119121		-0.0772	-0.000192861		5.3501e-05	0.000138792	-0.000347839		-0.0772	0.000137159		-0.000186217	-0.000108759	0.000155203
-0.077	0.0108362		0.0107731	0.0114567	0.011435		-0.077	0.0109827		0.0109131	0.0110896	0.0119116		-0.077	-0.000186104		5.4896e-05	0.000144666	-0.000336074		-0.077	0.000145338		-0.000191387	-0.000109112	0.000154753
-0.0768	0.0108332		0.010777	0.0114568	0.0114233		-0.0768	0.0109842		0.0109169	0.0110878	0.011906		-0.0768	-0.000189112		5.8773e-05	0.000144708	-0.000347724		-0.0768	0.000146832		-0.000187597	-0.00011097	0.000149129
-0.0766	0.010835		0.0107785	0.0114604	0.0114073		-0.0766	0.0109824		0.0109216	0.0110881	0.0119087		-0.0766	-0.000187312		6.0281e-05	0.000148368	-0.000363804		-0.0766	0.000145019		-0.000182928	-0.000110676	0.000151845
-0.0764	0.0108446		0.0107815	0.0114632	0.0114032		-0.0764	0.0109888		0.0109209	0.0110927	0.0119088		-0.0764	-0.000177769		6.3268e-05	0.000151114	-0.000367864		-0.0764	0.000151395		-0.000183598	-0.000106064	0.000151997
-0.0762	0.0108394		0.010787	0.0114597	0.0113988		-0.0762	0.0109871		0.0109252	0.0110918	0.011924		-0.0762	-0.00018296		6.8705e-05	0.0001477	-0.000372303		-0.0762	0.000149692		-0.00017936	-0.000106926	0.000167137
-0.076	0.010831		0.0107863	0.0114601	0.0113874		-0.076	0.0109796		0.0109149	0.0110887	0.0119288		-0.076	-0.000191334		6.8037e-05	0.000148085	-0.000383614		-0.076	0.000142158		-0.000189597	-0.000110083	0.000172001
-0.0758	0.0108344		0.0107857	0.0114614	0.0113937		-0.0758	0.0109845		0.0109115	0.0110853	0.011929		-0.0758	-0.000187936		6.7411e-05	0.000149351	-0.000377392		-0.0758	0.000147127		-0.000193073	-0.000113442	0.000172191
-0.0756	0.0108415		0.0107833	0.0114624	0.0113943		-0.0756	0.0109803		0.0109036	0.0110724	0.0119212		-0.0756	-0.0001808		6.5027e-05	0.000150339	-0.000376712		-0.0756	0.000142848		-0.000200945	-0.000126311	0.000164394
-0.0754	0.0108399		0.0107824	0.0114607	0.0114034		-0.0754	0.0109859		0.0109072	0.0110704	0.0119138		-0.0754	-0.000182474		6.4153e-05	0.00014863	-0.000367653		-0.0754	0.000148514		-0.000197327	-0.000128353	0.000156977
-0.0752	0.0108443		0.0107782	0.0114638	0.011402		-0.0752	0.0109917		0.0109095	0.0110656	0.0119151		-0.0752	-0.000178001		5.9927e-05	0.000151785	-0.000369064		-0.0752	0.000154249		-0.000195068	-0.000133177	0.000158257
-0.075	0.0108423		0.0107844	0.0114623	0.0114066		-0.075	0.010984		0.0109051	0.0110593	0.011922		-0.075	-0.000180026		6.6197e-05	0.000150275	-0.000364419		-0.075	0.000146621		-0.00019941	-0.000139455	0.00016514
-0.0748	0.0108477		0.0107753	0.011463	0.0114021		-0.0748	0.0109751		0.0109033	0.0110595	0.011917		-0.0748	-0.000174683		5.7054e-05	0.000150991	-0.000368978		-0.0748	0.000137671		-0.000201276	-0.000139221	0.000160151
-0.0746	0.0108504		0.0107773	0.0114642	0.0113976		-0.0746	0.0109764		0.0109047	0.0110523	0.0119152		-0.0746	-0.000171936		5.9092e-05	0.000152195	-0.00037348		-0.0746	0.000138985		-0.000199819	-0.00014646	0.000158324
-0.0744	0.0108547		0.0107696	0.0114604	0.0114038		-0.0744	0.0109807		0.0109173	0.0110527	0.0119121		-0.0744	-0.000167684		5.1354e-05	0.000148313	-0.000367286		-0.0744	0.00014327		-0.000187248	-0.000146057	0.000155303
-0.0742	0.0108524		0.0107679	0.0114596	0.0114002		-0.0742	0.0109817		0.0109169	0.01105	0.0119034		-0.0742	-0.000169957		4.9626e-05	0.00014758	-0.000370852		-0.0742	0.000144276		-0.000187638	-0.000148744	0.000146577
-0.074	0.0108545		0.0107619	0.0114538	0.011402		-0.074	0.0109794		0.010913	0.0110576	0.0118983		-0.074	-0.000167865		4.3652e-05	0.00014174	-0.000369006		-0.074	0.00014202		-0.000191534	-0.000141194	0.000141406
-0.0738	0.0108524		0.0107579	0.011458	0.0114068		-0.0738	0.0109789		0.0109119	0.0110568	0.0118876		-0.0738	-0.000169912		3.963e-05	0.000145909	-0.000364227		-0.0738	0.000141528		-0.000192664	-0.000141908	0.000130772
-0.0736	0.0108495		0.010761	0.0114486	0.0114048		-0.0736	0.0109741		0.0109119	0.0110523	0.0118931		-0.0736	-0.000172801		4.2714e-05	0.000136598	-0.000366229		-0.0736	0.000136731		-0.000192623	-0.000146474	0.000136237
-0.0734	0.0108544		0.0107595	0.0114455	0.011406		-0.0734	0.0109813		0.0109129	0.0110572	0.0119032		-0.0734	-0.000167926		4.1208e-05	0.000133458	-0.0003651		-0.0734	0.000143907		-0.000191665	-0.000141594	0.000146365
-0.0732	0.0108559		0.0107603	0.0114418	0.0114093		-0.0732	0.0109824		0.0109084	0.0110718	0.0118983		-0.0732	-0.000166459		4.2031e-05	0.000129729	-0.000361734		-0.0732	0.000145026		-0.000196166	-0.000126978	0.000141473
-0.073	0.0108587		0.0107564	0.011438	0.0114014		-0.073	0.0109769		0.0109048	0.0110625	0.0118985		-0.073	-0.000163668		3.8106e-05	0.00012595	-0.000369681		-0.073	0.000139486		-0.000199733	-0.000136208	0.000141692
-0.0728	0.01086		0.0107592	0.0114379	0.0114071		-0.0728	0.0109855		0.0109042	0.0110689	0.0118997		-0.0728	-0.000162307		4.0944e-05	0.000125893	-0.000363944		-0.0728	0.000148145		-0.000200308	-0.000129845	0.000142879
-0.0726	0.0108644		0.0107586	0.0114361	0.011404		-0.0726	0.0109823		0.0109089	0.0110586	0.0118993		-0.0726	-0.000157944		4.0329e-05	0.000124058	-0.000367046		-0.0726	0.000144883		-0.000195667	-0.000140166	0.000142453
-0.0724	0.0108661		0.0107582	0.0114442	0.0114007		-0.0724	0.0109728		0.0109098	0.0110623	0.0118945		-0.0724	-0.000156264		3.9919e-05	0.000132105	-0.000370375		-0.0724	0.00013543		-0.000194698	-0.000136408	0.000137649
-0.0722	0.0108694		0.0107527	0.0114393	0.0113933		-0.0722	0.0109687		0.0109149	0.0110637	0.0118897		-0.0722	-0.000152951		3.4461e-05	0.000127285	-0.000377804		-0.0722	0.000131284		-0.000189626	-0.000135018	0.000132861
-0.072	0.0108716		0.0107509	0.0114355	0.0113997		-0.072	0.0109605		0.0109068	0.0110614	0.0119064		-0.072	-0.000150769		3.2632e-05	0.000123475	-0.000371361		-0.072	0.000123112		-0.000197742	-0.000137366	0.000149532
-0.0718	0.0108788		0.0107422	0.0114359	0.0113982		-0.0718	0.0109604		0.0109113	0.0110612	0.0119041		-0.0718	-0.000143496		2.3965e-05	0.000123876	-0.000372875		-0.0718	0.000122988		-0.00019324	-0.000137575	0.000147287
-0.0716	0.01088		0.0107455	0.0114273	0.011407		-0.0716	0.0109628		0.0109099	0.0110587	0.0119076		-0.0716	-0.000142309		2.7261e-05	0.000115218	-0.000364089		-0.0716	0.000125373		-0.000194644	-0.000140085	0.000150751
-0.0714	0.0108784		0.0107445	0.0114336	0.0114082		-0.0714	0.0109729		0.0109167	0.0110599	0.0119166		-0.0714	-0.000143956		2.6216e-05	0.000121569	-0.00036286		-0.0714	0.000135537		-0.000187839	-0.000138872	0.000159802
-0.0712	0.0108762		0.0107398	0.0114321	0.011402		-0.0712	0.0109727		0.0109136	0.0110529	0.0119159		-0.0712	-0.000146104		2.1527e-05	0.000120072	-0.000369017		-0.0712	0.00013532		-0.000190958	-0.00014587	0.000159072
-0.071	0.0108733		0.0107326	0.0114223	0.0114094		-0.071	0.010977		0.0109137	0.0110519	0.011908		-0.071	-0.000149018		1.4355e-05	0.0001103	-0.00036165		-0.071	0.000139554		-0.000190833	-0.000146869	0.000151133
-0.0708	0.0108668		0.0107336	0.0114312	0.0114125		-0.0708	0.010983		0.0109249	0.0110533	0.0119108		-0.0708	-0.000155554		1.5316e-05	0.000119149	-0.000358584		-0.0708	0.000145593		-0.000179614	-0.000145455	0.00015393
-0.0706	0.0108558		0.0107292	0.011431	0.0114133		-0.0706	0.0109803		0.0109118	0.0110539	0.0119088		-0.0706	-0.000166494		1.0903e-05	0.000118957	-0.000357736		-0.0706	0.0001429		-0.000192725	-0.000144887	0.000151942
-0.0704	0.0108615		0.0107274	0.0114193	0.0114097		-0.0704	0.0109717		0.0109141	0.0110577	0.0119073		-0.0704	-0.000160823		9.116e-06	0.0001073	-0.000361348		-0.0704	0.000134324		-0.000190435	-0.000141024	0.000150444
-0.0702	0.0108625		0.0107274	0.0114194	0.0114175		-0.0702	0.0109832		0.0109122	0.0110602	0.0119099		-0.0702	-0.000159864		9.121e-06	0.000107375	-0.000353543		-0.0702	0.000145824		-0.00019234	-0.000138581	0.000153093
-0.07	0.0108601		0.0107171	0.0114164	0.011423		-0.07	0.0109878		0.0109175	0.0110505	0.0118986		-0.07	-0.000162212		-1.159e-06	0.000104351	-0.00034806		-0.07	0.000150419		-0.000187069	-0.000148278	0.000141728
-0.0698	0.0108586		0.0107206	0.0114072	0.0114366		-0.0698	0.010983		0.0109174	0.0110523	0.0118923		-0.0698	-0.000163703		2.383e-06	9.5129e-05	-0.000334462		-0.0698	0.000145571		-0.000187153	-0.000146424	0.000135467
-0.0696	0.0108634		0.0107168	0.0114047	0.0114272		-0.0696	0.0109824		0.0109153	0.0110533	0.0119011		-0.0696	-0.000158913		-1.424e-06	9.263e-05	-0.000343875		-0.0696	0.000144994		-0.000189196	-0.000145415	0.000144217
-0.0694	0.0108614		0.0107131	0.011413	0.0114346		-0.0694	0.0109724		0.0109112	0.0110541	0.0118977		-0.0694	-0.000160927		-5.146e-06	0.000100918	-0.000336429		-0.0694	0.000134949		-0.000193376	-0.000144611	0.000140889
-0.0692	0.0108684		0.0107136	0.0114123	0.0114389		-0.0692	0.0109683		0.0109155	0.0110549	0.0118864		-0.0692	-0.000153907		-4.616e-06	0.000100204	-0.000332166		-0.0692	0.00013085		-0.000189072	-0.000143878	0.000129598
-0.069	0.0108669		0.0107153	0.0114092	0.0114388		-0.069	0.0109735		0.0109096	0.0110552	0.0118762		-0.069	-0.000155398		-2.966e-06	9.7165e-05	-0.000332247		-0.069	0.000136102		-0.000194908	-0.000143525	0.000119303
-0.0688	0.0108731		0.0107199	0.0114127	0.0114392		-0.0688	0.0109758		0.0109068	0.0110638	0.0118804		-0.0688	-0.00014926		1.639e-06	0.000100649	-0.000331828		-0.0688	0.000138362		-0.000197738	-0.000134988	0.000123514
[truncated: 1,093 more rows]

## Sheet: ETA-dEMG early-recovery
DATA preBotC to 7n							DATA preBotC to 7n							DATA preBotC to 7n							DATA preBotC to 7n								dEMG peak					Statistics of 3 rats from white box
[truncated: 1,502 more rows]

[truncated: 3 more sheets: ETA -MP early recovery, ETA-dEMG conscious, ETA-MP conscious]
