# Supplementary material for: Selective transduction and photoinhibition of pre-Bötzinger complex neurons that project to the facial nucleus in rats affects nasofacial activity
Source: eLife. 2023 Sep 29;12:e85398. doi: 10.7554/eLife.85398 (PMC10653671; doi:10.7554/eLife.85398)
Supplement: Figure 8—source data 1. [file elife-85398-fig8-data1.xlsx]

## Sheet: fR - mix vs control
Two Way Analysis of Variance SigmaPlot v11					Analysis Summary			Mann-Whitney Analysis												DATA mix Dio-GtACR2+cre									DATA control							fR GtACr2-GFP						fR GtACr2-GFP
																				fR									fR
Two Way Analysis of Variance					Table Analyzed	fR			Below threshold?	P value	Mean rank of 50 HZ mix	Mean rank of control	Mean rank diff.	Mann-Whitney U	Adjusted P Value					time	20210715A	20210715C	20210715D	20210913A	20210913B				time	20210917B	20210917C	20210917D				rats	basal	P1	P2	recovery		rats	basal	P1	P2	recovery
								off	No	>0.999999	4.5	4.5	0	7.5	>0.999999					0	109.019	134.306	81.566	136.696	96.3915				0	173.344	166.893	212.575				20210715A	133.217	0	136.936	182.187		20210715A	100	0	102.792	136.76
Data source: Data 1 in Notebook1					Column A	50 HZ mix		P1	No	0.017857	3	7	-4	0	0.071429					1	115.4	134.296	80.902	129.444	89.5341				1	250.64	211.132	227.726				20210715C	144.682	0	127.279	153.22		20210715C	100	0	87.9715	105.901
					vs.	vs.		P2	No	0.857143	3.75	4.333	-0.5833	5	>0.999999					2	114.726	143.224	81.0435	141.171	99.7445				2	154.515	175.223	228.557				20210715D	162.224	0	171.751	185.88		20210715D	100	0	105.873	114.582
General Linear Model					Column B	control		off	No	0.785714	4.8	4	0.8	6	>0.999999					3	124.077	139.841	80.9501	132.683	87.8893				3	263.549	312.695	223.472				20210713A	157.891	0		200.151		20210713A	100	0		126.765
																				4	110.781	139.03	82.1011	152.631	90.2337				4	145.309	251.844	223.995				20210713B	105.234	0	135.048	218.995		20210713B	100	0	128.331	208.103
Dependent Variable: data					Test details															5	121.255	125.995	85.9276	147.161	89.5367				5	199.831	305.708	151.537
					Test name	Mann-Whitney test														6	131.404	136.713	86.3619	135.762	101.226				6	194.312	182.465	244.73
Normality Test:	Failed	(P < 0.050)			Comparison for each test	Compare ranks														7	126.81	114.531	86.924	146.601	94.8577				7	169.659	208.157	236.681
					Multiple comparisons	Set P value threshold														8	93.6416	94.5063	79.4	143.088	107.12				8	187.842	186.097	248.166				fR control						fR control
Equal Variance Test:	Passed	(P = 0.455)			Method	Bonferroni-Dunn method														9	68.3645	57.337	84.4476	164.917	112.982				9	202.486	268.164	237.709
					Alpha	0.05														10	139.686	42.442	89.2866	143.397	109.963				10	187.577	231.363	241.256				rats	basal	P1	P2	recovery		rats	basal	P1	P2	recovery
																				11	148.784	48.496	86.3745	147.327	105.296				11	178.998	234.523	254.902				20210917B	187.568	211.711	195.166	291.342		20210917B	100	112.872	104.051	155.326
					Number of tests performed	4														12	137.504	45.3952	86.2772	169.371	112.204				12	168.018	231.622	273.134				20210917C	256.029	266.423	265.969	304.55		20210917C	100	104.06	103.882	118.951
					Number of rows omitted	0														13	133.259	61.7535	86.326	152.677	96.4682				13	175.554	208.073	239.36				20210917D	239.738	261.225	268.294	243.83		20210917D	100	108.962	111.911	101.707
																				14	142.259	74.8845	88.4055	154.592	101.844				14	146.177	171.628	242.354
																				15	143.226	56.3596	89.3352	174.904	115.925				15	161.629	240.591	273.001
																				16	0	0	0	0	0				16	201.685	224.241	291.99
																				17	0	0	0	0	0				17	248.885	207.529	282.649
					Statistics - only period P1															18	0	0	0	0	0				18	210.103	238.305	271.461
																				19	0	0	0	0	0				19	171.161	257.77	267.156
					Mann-Whitney Rank Sum Test	Thursday, November 24, 2022, 10:02:56 AM														20	0	0	0	0	0				20	197.895	236.347	251.79
																				21	0	0	0	0	0				21	195.671	271.232	265.226
					Data source: Data 1 in Notebook4															22	0	0	0	0	0				22	202.728	209.988	254.937
																				23	0	0	0	0	0				23	189.691	176.356	256.378
					Group	N	Missing	Median	0.25	0.75										24	0	0	0	0	0				24	200.152	153.908	261.571
					mix GtACR2+cre	5	0	0	0	0										25	0	145.679	0	0	0				25	256.331	173.383	264.387
					control	3	0	108.962	105.285	111.894										26	0	139.672	0	0	0				26	243.976	244.195	243.476
																				27	0	198.38	8.17551	0	0				27	263.831	187.601	246.603
					Mann-Whitney U Statistic= 0.000															28	23.1549	136.351	34.9469	0	0				28	177.912	194.974	255.665
																				29	10.4962	78.5447	88.6869	124.369	0				29	288.517	185.459	259.063
					T = 21.000 n(small)= 3 n(big)= 5 P(est.)= 0.017 P(exact)= 0.036															30	128.67	76.6925	91.1189	196.361	0				30	253.955	255.553	262.126
																				31	146.475	93.2814	87.3615	207.22	0				31	266.91	234.745	263.528
																				32	148.15	112.194	83.298	199.367	0				32	288.106	343.803	275.218
																				33	152.48	123.615	78.9465	197.305	106.663				33	140.178	418.751	275.057
																				34	123.269	89.0755	121.849	217.315	92.1063				34	323.391	203.716	279.907
																				35	131.625	84.3142	128.133	212.624	132.026				35	308.542	162.932	253.909
																				36	95.897	97.2271	122.369	194.006	138.145				36	322.105	148.579	271.989
																				37	178.243	66.5773	116.817	228.694	98.365				37	262.478	153.858	281.65
																				38	160.957	111.859	113.156	238.715	169.043				38	309.614	289.709	266.093
																				39	159.233	160.205	119.684	210.381	164.866				39	310.771	177.799	275.113
																				40	145.194	141.426	118.342	206.566	136.766				40	307.313	277.75	281.977
																				41	105.911	131.724	129.651	211.597	166.744				41	291.607	283.502	246.057
																				42	118.957	148.122	132.832	166.569	162.335				42	303.32	136.715	240.764
																				43	111.267	157.294	136.753		199.459				43	306.372	256.608	225.735
																				44	163.25	182.39	141.69		179.357				44	302.546	242.803	235.862
																				45	149.523	179.802	124.218		181.203				45	303.825	241.789	245.937
																				46	170.078	167.777	134.364		139.352				46	297.166	202.337	189.54
																				47	189.47	189.921	125.235		194.608				47	305.428	297.821	227.681
																				48	164.474	191.792			213.298				48	282.132	278.244	169.305
																				49	156.108				200.993				49	311.414	316.362	208.729
																				50	172.035				180.72				50	232.798	226.109	218.108
																				51	179.042				153.818				51	267.864	226.438	221.503
																				52	167.075				219.502				52	294.423	246.451	234.612
																				53	177.303				238.567				53	275.479	343.812	222.063
																				54	172.696				226.65				54	300.312	281.233	255.893
																				55	185.738				174.713				55		260.101	264.299
																				56	176.725				238.349				56		134.437	155.333
																				57	200.142				199.807				57		265.587	245.272
																				58					234.513				58		207.523	262.167
																				59					229.203				59		373.951	260.493
																				60					248.156				60		343.186	268.321
																													61			268.581
																													62			248.308
																													63			249.418
																													64			249.019

## Sheet: DIA activity (AUC) mix vs contr
Two Way Analysis of Variance SigmaPlot v11					Analysis Summary				Mann-Whitney Analysis											DATA mix Dio-GtACR2+cre									DATA control							DATA mix Dio-GtACR2+cre									DATA control
										Below threshold?	P value	Mean rank of GtACR2	Mean rank of control	Mean rank diff.	Mann-Whitney U	Adjusted P Value				AUC DIA									AUC DIA							DIA amplitude									DIA amplitude
Two Way Analysis of Variance					Table Analyzed	DIA amplitude			off	No	>0.999999	4.5	4.5	0	7.5	>0.999999				rats	off	P1	P2	off					rats	off	P1	P2	off			time	20210715A	20210715C	20210715D	20210913A	20210913B				time	20210917B	20210917C	20210917D
									P1	No	0.035714	3	7	-4	0	0.142857				20210715A	0.151672	0.0983436	0.0633957	0.116198					20210917B	0.0771914	0.0682689	0.0543243	0.0748729			0	1.38466	1.23555	0.43541	0.87578	0.77216				0	0.49204	0.52999	0.5335
Data source: Data 1 in DIA activity					Column A	50 HZ mix			P2	No	0.114286	2.75	5.667	-2.917	1	0.457143				20210715C	0.221772	0.139164	0.163775	0.260672					20210917C	0.0620885	0.0749022	0.0705188	0.0585509			1	1.22781	1.16104	0.50138	0.76947	0.8629				1	0.50265	0.65931	0.48393
					vs.	vs.			off	No	0.785714	4.2	5	-0.8	6	>0.999999				20210715D	0.0480406	0.00809532	0.0307048	0.0530906					20210917D	0.0389954	0.0363579	0.0391401	0.0366154			2	1.20898	1.06964	0.45172	0.83222	0.80659				2	0.50497	0.76389	0.49175
General Linear Model					Column B	control														20210713A	0.093035	0.0680281		0.084486												3	1.2189	1.0343	0.4725	0.7999	0.8219				3	0.37664	0.46939	0.56712
																				20210713B	0.113896	0.0418565	0.051436	0.0784526												4	1.21919	1.16718	0.49522	0.85284	0.83222				4	0.54637	0.57018	0.50473
Dependent Variable: data					Test details																															5	1.0312	1.19697	0.45064	0.86352	0.85517				5	0.51479	0.53975	0.52563
					Test name	Mann-Whitney test																														6	1.25205	1.07921	0.39537	0.87177	0.76105				6	0.49662	0.62152	0.57712
Normality Test:	Failed	(P < 0.050)			Comparison for each test	Compare ranks																														7	1.11247	1.15628	0.42592	0.77277	0.78885				7	0.51336	0.58637	0.53577
					Multiple comparisons	Set P value threshold																														8	2.34168	1.11556	0.45124	0.87651	0.73133				8	0.4475	0.55399	0.52525
Equal Variance Test:	Passed	(P = 0.445)			Method	Bonferroni-Dunn method																														9	1.0224	1.17596	0.45524	1.11844	0.77305				9	0.45033	0.50697	0.52021
					Alpha	0.05														DATA mix Dio-GtACR2+cre									DATA control							10	1.12917	1.28796	0.39895	0.87635	0.74537				10	0.48843	0.56147	0.45969
																				AUC DIA									AUC DIA							11	1.03491	1.39307	0.4065	0.85103	0.72131				11	0.47172	0.56379	0.51096
					Number of tests performed	4														rats	off	P1	P2	off					rats	off	P1	P2	off			12	1.06545	1.32129	0.4007	0.8987	0.90357				12	0.5234	0.50002	0.5472
					Number of rows omitted	0														20210715A	100	64.8396	41.7978	76.6109					20210917B	100	88.4411	70.3761	96.9964			13	1.19091	1.36721	0.41851	0.93406	0.82788				13	0.49052	0.5347	0.49941
																				20210715C	100	62.7507	73.8481	117.541					20210917C	100	120.638	113.578	94.3025			14	1.21115	1.34183	0.46462	0.90721	0.94401				14	0.6021	0.73242	0.47774
																				20210715D	100	16.851	63.9143	110.512					20210917D	100	93.2364	100.371	93.8967			15	1.15939	1.16457	0.34417	1.08774	0.73808				15	0.4819	0.56352	0.50468
																				20210713A	100	73.1209		90.811												16	0.738538	0.280964	0.0163	0.366701	0.149561				16	0.49045	0.5082	0.49221
																				20210713B	100	36.7497	45.1605	68.881												17	0.354649	0.251908	0.0163	0.342373	0.152115				17	0.51565	0.52061	0.46747
																																				18	0.184512	0.254021	0.0163	0.382665	0.157982				18	0.48597	0.4655	0.47629
																																				19	0.134044	0.246039	0.0163	0.387636	0.169883				19	0.44082	0.62428	0.42371
					Statistics - only period P1																															20	0.119964	0.264561	0.0163	0.394692	0.160404				20	0.50162	0.60445	0.53725
																																				21	0.151698	0.352724	0.0163	0.422493	0.160041				21	0.46683	0.60633	0.44055
																																				22	0.152334	0.289773	0.0163	0.719759	0.159008				22	0.52894	0.54948	0.47163
					Normality Test:	Passed	(P = 0.379)																													23	0.150938	0.359828	0.0163	0.668109	0.161921				23	0.60491	0.5664	0.55984
																																				24	0.154662	0.537655	0.0163	0.58277	0.147479				24	0.51387	0.51947	0.46619
					Equal Variance Test:	Passed	(P = 0.771)																													25	0.15641	0.94539	0.0163	0.527532	0.147976				25	0.41918	0.56581	0.42048
																																				26	0.161171	1.0352	0.0163	0.449716	0.142056				26	0.49999	0.56485	0.51068
					Group Name	N	Missing	Mean	Std Dev	SEM																										27	0.213076	0.90698	0.15859	0.453339	0.124206				27	0.54889	0.64629	0.52275
					mix GtACR2+cre	5	0	50.862	23.388	10.46																										28	0.64848	1.06319	0.17863	0.632522	0.120707				28	0.49604	0.59251	0.47171
					control	3	0	100.772	17.371	10.029																										29	0.58804	1.42487	0.21717	2.94887	0.113137				29	0.41083	0.56388	0.47532
																																				30	0.67351	0.97515	0.244	1.08667	0.113269				30	0.50477	0.66393	0.48259
					Difference	-49.909																														31	0.72692	0.98857	0.25558	1.02078	0.104659				31	0.54459	0.62542	0.44491
																																				32	0.67055	1.00575	0.88348	0.95035	0.115097				32	0.55161	0.51549	0.47387
					t = -3.168 with 6 degrees of freedom. (P = 0.019)																															33	0.93905	1.25266	0.7077	1.04599	0.44572				33	1.12979	0.59648	0.45387
																																				34	1.01242	1.70584	0.46925	1.05928	0.46911				34	0.41683	0.62279	0.49464
					95 percent confidence interval for difference of means: -88.454 to -11.365																															35	1.0343	1.57699	0.47579	1.17223	0.62334				35	0.48469	0.48202	0.4222
																																				36	1.64194	2.21869	0.48134	0.99164	1.06609				36	0.47747	0.56842	0.4917
																																				37	0.6678	2.02864	0.52811	1.05656	0.55914				37	0.59398	0.73689	0.43419
																																				38	0.73311	1.56448	0.46994	1.0923	0.50172				38	0.51175	0.59168	0.51739
																																				39	0.90838	1.55936	0.49767	1.10618	0.54376				39	0.52014	0.55642	0.49533
																																				40	0.80294	1.36286	0.48846	0.96817	0.72384				40	0.53621	0.581	0.54535
																																				41	0.79038	1.36121	0.473	1.10807	0.71702				41	0.4774	0.44238	0.49575
																																				42	0.89149	1.19981	0.48173	0.88922	0.8449				42	0.44676	0.68203	0.52245
																																				43	2.16783	1.11341	0.42508		0.81061				43	0.46328	0.64227	0.45688
																																				44	1.59574	1.25796	0.47886		0.81236				44	0.47613	0.56583	0.46045
																																				45	1.51332	1.18	0.51578		0.66425				45	0.48543	0.50165	0.47403
																																				46	1.39837	1.25752	0.46288		2.4128				46	0.50281	0.54709	0.47271
																																				47	1.28289	1.13906	0.5242		0.98491				47	0.49927	0.45515	0.45792
																																				48	1.36719	1.00315			1.00616				48	0.58779	0.65815	0.40921
																																				49	1.40732				1.00704				49	0.55913	0.55757	0.44657
																																				50	1.27953				1.09906				50	0.48223	0.57531	0.45048
																																				51	1.46447				0.97205				51	0.5433	0.60131	0.41549
																																				52	1.37822				0.86607				52	0.56762	0.49146	0.46578
																																				53	1.30866				0.80138				53	0.52287	0.57672	0.43748
																																				54	1.34221				0.95109				54	0.618	0.61329	0.44969
																																				55	1.38184				1.02216				55		0.52397	0.39162
																																				56	1.52745				0.85529				56		0.53558	0.38081
																																				57	1.33429				1.13015				57		0.49929	0.44645
																																				58					0.8689				58		0.54108	0.40535
																																				59					0.86552				59		0.66146	0.46324
																																				60					0.84943				60		0.48246	0.5483
																																													61			0.51827
																																													62			0.45749
																																													63			0.47536
																																													64			0.56821

## Sheet: HR - mix vs control
Two Way Analysis of Variance SigmaPlot v11					Analysis Summary				Mann-Whitney Analysis												DATA mix Dio-GtACR2+cre								DATA control					HR GtACr2-GFP						HR GtACr2-GFP
																					HR									HR
Two Way Analysis of Variance					Table Analyzed	HR				Below threshold?	P value	Mean rank of 50 HZ mix	Mean rank of control	Mean rank diff.	Mann-Whitney U	Adjusted P Value					time	20210715A	20210715C	20210715D	20210913A	20210913B			time	20210917B	20210917C	20210917D		rats	basal	P1	P2	5 cycles after stim		rats	basal	P1	P2	5 cycles after stim
									off	No	>0.999999	4.5	4.5	0	7.5	>0.999999					0	197.667	143.75	172.948	226.945	166.941			0	242.482	201.429	223.645		20210715A	195.48	161.43	133.921	205.092		20210715A	100	82.5814	68.5091	104.917
Data source: Data 1 in HR - normality test					Column A	50 HZ mix			P1	No	>0.999999	4.6	4.333	0.2667	7	>0.999999					1	209.658	138.48	169.704	225.258	151.37			1	235.327	206.483	221.916		20210715C	135.234	108.321	137.432	147.982		20210715C	100	80.0987	101.625	109.427
					vs.	vs.			P2	No	0.857143	4.25	3.667	0.5833	5	>0.999999					2	199.34	139.783	168.424	225.762	154.244			2	237.974	122.41	221.741		20210715D	177.612	201.37	223.06	252.307		20210715D	100	113.377	125.589	142.055
General Linear Model					Column B	control			off	No	0.571429	4	5.333	-1.333	5	>0.999999					3	204.301	147.368	162.326	225.281	167.101			3	244.092	256.893	224.022		20210713A	229.368	246.586		256.25		20210713A	100	107.507		111.72
																					4	197.325	130.223	162.347	224.369	186.829			4	247.305	212.206	224.548		20210713B	162.662	251.419	188.291	241.168		20210713B	100	154.565	115.756	148.263
Dependent Variable: data					Test details																5	201.762	132.602	159.742	226.55	146.489			5	241.448	217.117	222.751
					Test name	Mann-Whitney test															6	196.234	136.423	161.826	223.438	162.33			6	246.731	231.618	225.103
Normality Test:	Failed	(P < 0.050)			Comparison for each test	Compare ranks															7	197.063	141.792	160.763	228.693	170.314			7	252.819	246.593	220.843
					Multiple comparisons	Set P value threshold															8	199.368	126.042	159.543	231.376	162.832			8	252.123	232.01	220.056
Equal Variance Test:	Passed	(P = 0.539)			Method	Bonferroni-Dunn method															9	168.651	109.58	173.557	229.713	164.31			9	251.817	245.613	227.632		HR control						HR control
					Alpha	0.05															10	177.82	109.462	172.178	227.145	156.573			10	251.012	236.772	227.49
																					11	190.17	112.394	175.712	225.396	163.723			11	252.347	180.373	224.106		rats	basal	P1	P2	5 cycles after stim		rats	basal	P1	P2	5 cycles after stim
					Number of tests performed	4															12	194.298	103.488	176.003	226.811	165.492			12	252.724	203.725	227.57		20210917B	252.115	254.587	259.381	280.513		20210917B	100	100.981	102.882	111.264
					Number of rows omitted	0															13	196.138	110.889	177.095	228.509	147.89			13	252.681	249.386	229.403		20210917C	186.92	206.279	188.629	277.675		20210917C	100	110.357	100.914	148.553
																					14	193.386	140.018	175.864	229.992	157.801			14	252.435	271.664	229.497		20210917D	229.728	239.847	242.991	257.38		20210917D	100	104.405	105.773	112.037
																					15	198.601	141.46	172.81	228.686	149.682			15	250.934	269.79	232.922
																					16	192.892	111.562	173.41	323.571	169.837			16	252.958	268.936	238.909
																					17	164.93	109.863	178.846	303.295	174.61			17	257.068	260.605	242.56
																					18	157.388	107.768	181.71	316.59	233.099			18	260.399	271.191	247.03
					Statistics - only period P1																19	167.338	107.197	182.466	294.408	247.903			19	259.76	241.502	239.748
																					20	168.915	109.826	208.866	280.469	253.324			20	260.924	259.814	238.716
					Normality Test:	Passed	(P = 0.151)														21	186.402	118.043	221.272	260.724	254.03			21	256.357	269.788	242.972
																					22	193.836	113.285	219.696	296.369	255.333			22	257.672	252.941	238.544
					Equal Variance Test:	Passed	(P = 0.163)														23	194.41	116.373	216.115	244.737	252.292			23	256.824	243.981	240.696
																					24	192.147	111.646	219.233	233.565	248.608			24	258.864	305.417	243.549
					Group Name	N	Missing	Mean	Std Dev	SEM											25	167.639	119.764	181.811	220.261	247.035			25	254.843	258.304	237.605
					mix GtACR2+cre	5	0	107.626	30.089	13.456											26	140.512	175.594	191.443	208.57	234.456			26	258.847	277.855	237.261
					control	3	0	105.247	4.744	2.739											27	140.483	179.205	188.66	241.113	169.987			27	285.6	266.634	237.104
																					28	137.927	224.84	184.167	242.86	158.041			28	270.214	276.892	238.035
					Difference	2.378															29	132.775	232.226	182.634	320.106	139.888			29	248.166	251.323	236.126
																					30	131.863	145.419	173.742	198.305	132.886			30	266.724	264.482	235.537
					t = 0.132 with 6 degrees of freedom. (P = 0.899)																31	133.447	155.677	171.741	220.729	131.586			31	283.952	248.471	235.862
																					32	142.043	137.432	169.469	240.813	129.522			32	281.869	261.043	238.081
					95 percent confidence interval for difference of means: -41.795 to 46.552																33	184.488	148.664	126.097	258.474	134.464			33	277.19	270.616	238.076
																					34	191.859	178.917	108.082	258.254	133.142			34	212.022	238.208	243.032
																					35	198.427	147.695	109.361	261.02	184.444			35	221.383	242.742	242.452
																					36	293.585	152.109	105.253	261.044	268.289			36	227.32	253.045	242.13
																					37	168.633	147.767	106.373	259.418	227.039			37	275.969	261.268	239.659
																					38	183.611	113.488	117.746	249.06	248.343			38	281.81	237.103	245.293
																					39	179.267	134.685	120.909	250.683	248.846			39	292.244	288.965	243.813
																					40	184.989	145.263	125.105	250.145	239.759			40	296.911	250.973	256.398
																					41	185.421	144.955	126.667	250.92	243.868			41	297.909	265.195	247.912
																					42	187.157	161.975	131.692	240.15	182.643			42	288.836	195.789	247.633
																					43	195.211	201.879	147.218		217.233			43	280.319	299.773	243.724
																					44	157.851	138.505	154.438		251.118			44	285.498	255.687	240.542
																					45	174.841	180.653	156.572		252.99			45	290.409	282.492	236.797
																					46	182.686	181.19	161.693		252.704			46	287.705	237.907	234.568
																					47	193.995	179.987	159.178		173.927			47	292.606	236.141	236.818
																					48	236.907	178.937			224.072			48	279.317	321.293	231.406
																					49	235.921				257.183			49	288.772	277.152	231.716
																					50	227.809				263.295			50	284.836	305.712	231.674
																					51	225.292				266.424			51	276.964	297.221	228.887
																					52	231.072				269.406			52	285.84	338.778	228.766
																					53	190.722				274.241			53	284.708	322.966	231.588
																					54	212.54				281.209			54	283.797	286.967	236.824
																					55	216.693				283.907			55		202.832	241.249
																					56	213.626				278.502			56		279.439	240.822
																					57	214.714				278.288			57		304.845	247.682
																					58					276.859			58		205.015	245.648
																					59					286.898			59		300.219	248.201
																					60					293.908			60		243.778	252.097
																													61			242.604
																													62			242.721
																													63			251.505
																													64			250.389

## Sheet: apnea duration mix
DATA GtACr2-GFP					DATA control				apnea duration				missed resp cycles
	apnea duration	1 resp cycle	missed res cycles		rats	apnea duration	missed res cycles		Column B	control			Column B	control
20210715A	12.3115	0.51812	23.7619		20210917B	0	0		vs.	vs.			vs.	vs.
20210715C	9.31053	0.56644	16.4369		20210917C	0	0		Column A	GtACR2+CRE			Column A	GtACR2+CRE
20210715D	11.2769	0.671414	16.7957		20210917D	0	0
20210713A	12.7848	0.38352	33.3353						Unpaired t test with Welch's correction				Unpaired t test with Welch's correction
20210713B	16.6716	0.57452	29.0183						P value	0.0005			P value	0.002
									P value summary	***			P value summary	**
									Significantly different (P < 0.05)?	Yes			Significantly different (P < 0.05)?	Yes
average	12.4711		23.8696						One- or two-tailed P value?	Two-tailed			One- or two-tailed P value?	Two-tailed
SD	2.70109		7.43984						Welch-corrected t, df	t=10.32, df=4.000			Welch-corrected t, df	t=7.174, df=4.000
confidence 95%	3.354		9.2396
bottom limit	9.117		14.63						How big is the difference?				How big is the difference?
upper limit	15.82		33.11						Mean of column A	12.47			Mean of column A	23.87
n	5		5						Mean of column B	0			Mean of column B	0
									Difference between means (B - A) ± SEM	-12.47 ± 1.208			Difference between means (B - A) ± SEM	-23.87 ± 3.327
									95% confidence interval	-15.82 to -9.117			95% confidence interval	-33.11 to -14.63
									R squared (eta squared)	0.9638			R squared (eta squared)	0.9279
									Data analyzed				Data analyzed
									Sample size, column A	5			Sample size, column A	5
									Sample size, column B	3			Sample size, column B	3

## Sheet: MP Activity (AUC) mix vs contro
Two Way Analysis of Variance SigmaPlot v11					Analysis Summary				Mann-Whitney Analysis											DATA mix Dio-GtACR2+cre								DATA control
										Below threshold?	P value	Mean rank of 50 HZ mix	Mean rank of control	Mean rank diff.	Mann-Whitney U	Adjusted P Value				AUC MP								AUC MP
Two Way Analysis of Variance					Table Analyzed	MP activity			off	No	>0.999999	4.5	4.5	0	7.5	>0.999999				rats	off	P1	P2	off				rats	off	P1	P2	off
									P1	No	0.071429	5.8	2.333	3.467	1	0.285714				20210715A	0.0171814	0.0555397	0.0189251	0.0211114				20210917B	0.067237	0.0629938	0.0656092	0.0538692
Data source: Data 1 in MP activity					Column A	50 HZ mix			P2	No	0.114286	5.25	2.333	2.917	1	0.457143				20210715C	0.0309563	0.0334889	0.0321019	0.0298895				20210917C	0.0400007	0.0433806	0.0477147	0.0473488
					vs.	vs.			off	No	0.142857	5.6	2.667	2.933	2	0.571429				20210715D	0.0160856	0.0255046	0.0196366	0.0196089				20210917D	0.016463	0.0180966	0.0170194	0.0159308
General Linear Model					Column B	control														20210913A	0.0528132	0.199426		0.0680318
																				20210913B	0.0523204	0.150813	0.115701	0.111066
Dependent Variable: data					Test details
					Test name	Mann-Whitney test
Normality Test:	Failed	(P < 0.050)			Comparison for each test	Compare ranks
					Multiple comparisons	Set P value threshold
Equal Variance Test:	Passed	(P = 0.155)			Method	Bonferroni-Dunn method
					Alpha	0.05
																				noise								noise
					Number of tests performed	4
					Number of rows omitted	0														20210715A	0.0133179							20210917B	0.0191212
																				20210715C	0.0264548							20210917C	0.0116969
																				20210715D	0.0125201							20210917D	0.014054
																				20210913A	0.0207888
																				20210913B	0.0314894
					Statistics - only period P1
					Normality Test:	Passed	(P = 0.138)
																				DATA mix Dio-GtACR2+cre								DATA control
					Equal Variance Test:	Passed	(P = 0.223)													AUC MP								AUC MP
																				rats	off	P1	P2	off				rats	off	P1	P2	off
					Group Name	N	Missing	Mean	Std Dev	SEM										20210715A	0.00386351	0.0422218	0.00560718	0.00779344				20210917B	0.0481158	0.0438726	0.046488	0.034748
					mix GtACR2+cre	5	0	548.78	348.141	155.693										20210715C	0.0045015	0.00703402	0.00564701	0.00343466				20210917C	0.0283038	0.0316837	0.0360179	0.035652
					control	3	0	123.646	39.635	22.883										20210715D	0.00356551	0.0129845	0.00711646	0.00708873				20210917D	0.00240895	0.00404256	0.00296537	0.0018767
																				20210913A	0.0320244	0.178637		0.0472429
					Difference	425.134														20210913B	0.020831	0.119324	0.0842121	0.0795769
					t = 2.041 with 6 degrees of freedom. (P = 0.087)
					95 percent confidence interval for difference of means: -84.467 to 934.734
																				DATA mix Dio-GtACR2+cre								DATA control
																				AUC MP								AUC MP
																				rats	off	P1	P2	off				rats	off	P1	P2	off
																				20210715A	100	1092.83	145.132	201.719				20210917B	100	91.1813	96.6169	72.2174
																				20210715C	100	156.26	125.447	76.3003				20210917C	100	111.942	127.254	125.962
																				20210715D	100	364.168	199.592	198.814				20210917D	100	167.815	123.098	77.9056
																				20210913A	100	557.817		147.522
																				20210913B	100	572.819	404.264	382.012

## Sheet: fR preBotC to 7n
Two Way Analysis of Variance SigmaPlot v11					Analysis Summary				Mann-Whitney Analysis												DATA preBotC to 7n									DATA control						fR preBotC--7n						fR preBotC--7n
										Below threshold?	P value	Mean rank of GtACR2	Mean rank of control	Mean rank diff.	Mann-Whitney U	Adjusted P Value					fR									fR
Two Way Analysis of Variance					Table Analyzed	fR			off	No	>0.999999	4.5	4.5	0	7.5	>0.999999					time	20210716A	20210716B	20210716C	20210914A	20210914B				time	20210917B	20210917C	20210917D			rats	basal	P1	P2	recovery		rats	basal	P1	P2	recovery
									P1	No	0.035714	3	7	-4	0	0.142857					0	135.504	135.765	141.645	127.008	129.321				0	173.344	166.893	212.575			20210716A	143.766	115.125	128.942	207.067		20210716A	100	80.0781	89.689	144.03
Data source: Data 1 in fR - normality test					Column A	preBotC to 7n			P2	No	0.571429	4	5.333	-1.333	5	>0.999999					1	103.187	160.226	149.282	119.569	131.252				1	250.64	211.132	227.726			20210716B	195.675	110.324	197.657	283.138		20210716B	100	56.3811	101.013	144.698
					vs.	vs.			off2	No	0.571429	5	3.667	1.333	5	>0.999999					2	113.873	135.765	137.068	130.247	114.505				2	154.515	175.223	228.557			20210716C	138.208	120.431	120.108	151.211		20210716C	100	87.1375	86.9035	109.408
General Linear Model					Column B	control															3	91.7441	118.377	140.899	132.736	177.765				3	263.549	312.695	223.472			20210914A	124.423	71.6746	136.395	223.913		20210914A	100	57.6058	109.622	179.961
																					4	133.488	206.292	137.781	122.237	182.462				4	145.309	251.844	223.995			20210914B	164.905	139.41	187.396	233.78		20210914B	100	84.5398	113.639	141.766
Dependent Variable: data					Test details																5	121.842	204.514	117.306	148.805	164.773				5	199.831	305.708	151.537
					Test name	Mann-Whitney test															6	136.65	193.561	123.232	118.611	160.477				6	194.312	182.465	244.73
Normality Test:	Failed	(P < 0.050)			Comparison for each test	Compare ranks															7	117.155	204.699	127.674	133.07	152.909				7	169.659	208.157	236.681
					Multiple comparisons	Set P value threshold															8	114.398	185.752	125.064	148.282	149.423				8	187.842	186.097	248.166			fR control						fR control
Equal Variance Test:	Passed	(P = 0.384)			Method	Bonferroni-Dunn method															9	138.264	195.806	121.982	139.952	150.386				9	202.486	268.164	237.709
					Alpha	0.05															10	135.353	197.645	121.227	141.789	162.063				10	187.577	231.363	241.256			rats	basal	P1	P2	recovery		rats	basal	P1	P2	recovery
																					11	125.315	177.857	114.128	149.235	172.134				11	178.998	234.523	254.902			20210917B	187.568	211.711	195.166	291.342		20210917B	100	112.872	104.051	155.326
					Number of tests performed	4															12	154.184	215.304	117.236	127.226	170.265				12	168.018	231.622	273.134			20210917C	256.029	266.423	265.969	304.55		20210917C	100	104.06	103.882	118.951
					Number of rows omitted	0															13	129.034	195.103	137.984	124.801	184.081				13	175.554	208.073	239.36			20210917D	239.738	261.225	268.294	243.83		20210917D	100	108.962	111.911	101.707
																					14	132.469	235.905	132.954	122.92	159.881				14	146.177	171.628	242.354
																					15	140.77	200.352	145.626	121.133	171.812				15	161.629	240.591	273.001
																					16	70.8113	89.9901	156.51	75.7494	158.107				16	201.685	224.241	291.99
					Statistics - only period P1																17	106.113	144.602	95.2994	75.1123	136.382				17	248.885	207.529	282.649
																					18	211.955	103.417	102.463	68.5998	141.767				18	210.103	238.305	271.461
					Normality Test:	Passed	(P = 0.446)														19	83.5861	188.292	102.232	67.5059	177.231				19	171.161	257.77	267.156
																					20	124.369	176.944	116.526	95.2302	177.417				20	197.895	236.347	251.79
					Equal Variance Test:	Passed	(P = 0.256)														21	116.133	149.094	120.282	95.2541	165.898				21	195.671	271.232	265.226
																					22	138.453	211.981	137.857	124.171	185.765				22	202.728	209.988	254.937
					Group Name	N	Missing	Mean	Std Dev	SEM											23	116.769	222.355	137.147	135.234	190.941				23	189.691	176.356	256.378
					preBotC to 7n	5	0	73.148	14.968	6.694											24	120.909	194.114	134.16	134.488	159.836				24	200.152	153.908	261.571
					control	3	0	108.631	4.415	2.549											25	119.422	217.483	86.3467	129.881	160.997				25	256.331	173.383	264.387
																					26	130.27	191.724	139.422	156.746	186.653				26	243.976	244.195	243.476
					Difference	-35.483															27	163.617	212.625	163.585	154.583	194.376				27	263.831	187.601	246.603
																					28	192.061	218.5	152.138	163.005	175.117				28	177.912	194.974	255.665
					t = -3.892 with 6 degrees of freedom. (P = 0.008)																29	156.765	212.282	146.31	155.161	190.817				29	288.517	185.459	259.063
																					30	151.213	226.93	140.722	169.969	199.392				30	253.955	255.553	262.126
					95 percent confidence interval for difference of means: -57.792 to -13.173																31	152.296	180.943	144.644	163.154	202.442				31	266.91	234.745	263.528
																					32	176.733	212.331	131.95	164.106	200.775				32	288.106	343.803	275.218
																					33	162.946	199.67	134.572	168.993	204.393				33	140.178	418.751	275.057
																					34	209.562	245.555	103.5	179.186	194.95				34	323.391	203.716	279.907
																					35	194.933	279.645	114.035	183.839	193.998				35	308.542	162.932	253.909
																					36	186.861	187.118	167.106	208.142	193.711				36	322.105	148.579	271.989
																					37	114.726	217.636	201.515	188.565	157.873				37	262.478	153.858	281.65
																					38	116.706	287.729	199.38	182.723	353.487				38	309.614	289.709	266.093
																					39	204.392	271.814	157.227	186.329	208.369				39	310.771	177.799	275.113
																					40	218.042	281.105	164.596	168.989	229.882				40	307.313	277.75	281.977
																					41	191.871	262.438	135.861	213.932	200.774				41	291.607	283.502	246.057
																					42	216.679	261.149	164.431	254.025	216.198				42	303.32	136.715	240.764
																					43	181.87	285.749	166.347	216.418	227.376				43	306.372	256.608	225.735
																					44	200.415	313.857	157.578	203.13	209.479				44	302.546	242.803	235.862
																					45	172.511	272.727	147.868	211.58	165.576				45	303.825	241.789	245.937
																					46	188.162	229.947	157.364		260.246				46	297.166	202.337	189.54
																					47	207.536	288.434	169.054		246.456				47	305.428	297.821	227.681
																					48	196.729	292.438			215.784				48	282.132	278.244	169.305
																					49		311.256			229.73				49	311.414	316.362	208.729
																					50					228.991				50	232.798	226.109	218.108
																					51					230.115				51	267.864	226.438	221.503
																														52	294.423	246.451	234.612
																														53	275.479	343.812	222.063
																														54	300.312	281.233	255.893
																														55		260.101	264.299
																														56		134.437	155.333
																														57		265.587	245.272
																														58		207.523	262.167
																														59		373.951	260.493
																														60		343.186	268.321
																														61			268.581
																														62			248.308
																														63			249.418
																														64			249.019

## Sheet: DIA activity- preBotC to 7n
Two Way Analysis of Variance SigmaPlot v11					Analysis Summary				Mann-Whitney Analysis											DATA preBotC to 7n									DATA control								DATA preBotC to 7n									DATA control
										Below threshold?	P value	Mean rank of 50 HZ mix	Mean rank of control	Mean rank diff.	Mann-Whitney U	Adjusted P Value				AUC DIA									AUC DIA								DIA amplitude									DIA amplitude
Two Way Analysis of Variance					Table Analyzed	Two-way ANOVA , not RM			off	No	>0.999999	4.5	4.5	0	7.5	>0.999999				rats	off	P1	P2	off					rats	off	P1	P2	off				time	20210716A	20210716B	20210716C	20210714A	20210714B				time	20210917B	20210917C	20210917D
									P1	No	>0.999999	4.6	4.333	0.2667	7	>0.999999				20210716A	0.0487324	0.079531	0.0487469	0.0418381					20210917B	0.0771914	0.0682689	0.0543243	0.0748729				0	0.57678	0.67823	0.89749	0.80141	0.70845				0	0.49204	0.52999	0.5335
Data source: Data 1 in DIA AUC					Column A	preBotC to 7n			P2	No	>0.999999	4.6	4.333	0.2667	7	>0.999999				20210716B	0.05266	0.0394263	0.0578033	0.035783					20210917C	0.0620885	0.0749022	0.0705188	0.0585509				1	0.54163	0.76198	0.92094	0.86755	0.68138				1	0.50265	0.65931	0.48393
					vs.	vs.			off2	No	0.035714	3	7	-4	0	0.142857				20210716C	0.102229	0.0949038	0.107722	0.0746506					20210917D	0.0389954	0.0363579	0.0391401	0.0366154				2	0.49327	0.69598	0.98009	0.81248	0.9336				2	0.50497	0.76389	0.49175
General Linear Model					Column B	control														20210914A	0.139895	0.144968	0.151612	0.0830996													3	0.60411	0.88558	1.00502	0.81895	0.64303				3	0.37664	0.46939	0.56712
																				20210914B	0.0762873	0.0865335	0.0678604	0.0527875													4	0.56946	0.68737	0.98264	0.7287	0.61644				4	0.54637	0.57018	0.50473
Dependent Variable: data					Test details																																5	0.54047	0.60424	0.99722	0.76669	0.65153				5	0.51479	0.53975	0.52563
					Test name	Mann-Whitney test																															6	0.5755	0.68454	1.05363	0.88735	0.63759				6	0.49662	0.62152	0.57712
Normality Test:	Failed	(P < 0.050)			Comparison for each test	Compare ranks																															7	0.5692	0.68442	1.16113	0.94095	0.67092				7	0.51336	0.58637	0.53577
					Multiple comparisons	Set P value threshold																															8	0.4986	0.7171	0.96157	0.89384	0.73682				8	0.4475	0.55399	0.52525
Equal Variance Test:	Passed	(P = 0.249)			Method	Bonferroni-Dunn method																															9	0.53627	0.68615	1.06947	0.85019	0.81098				9	0.45033	0.50697	0.52021
					Alpha	0.05														DATA preBotC to 7n									DATA control								10	0.48162	0.69271	1.05151	0.85435	0.7315				10	0.48843	0.56147	0.45969
																				AUC DIA									AUC DIA								11	0.63414	0.80586	0.85504	0.96549	0.69853				11	0.47172	0.56379	0.51096
					Number of tests performed	4														rats	off	P1	P2	off					rats	off	P1	P2	off				12	0.54831	0.63516	0.95749	1.05009	0.74303				12	0.5234	0.50002	0.5472
					Number of rows omitted	0														20210716A	100	163.199	100.03	85.8528					20210917B	100	88.4411	70.3761	96.9964				13	0.5172	0.67824	1.12197	1.01051	0.64669				13	0.49052	0.5347	0.49941
																				20210716B	100	74.8694	109.767	67.951					20210917C	100	120.638	113.578	94.3025				14	0.52855	0.66591	1.16172	0.99427	0.74298				14	0.6021	0.73242	0.47774
																				20210716C	100	92.8349	105.374	73.0232					20210917D	100	93.2364	100.371	93.8967				15	0.4986	0.70458	1.18645	0.98586	0.77936				15	0.4819	0.56352	0.50468
																				20210914A	100	103.626	108.375	59.4012													16	0.46615	0.46428	0.95524	0.95178	0.66333				16	0.49045	0.5082	0.49221
																				20210914B	100	113.431	88.9538	69.1958													17	0.42644	0.41949	0.86382	1.15808	0.62388				17	0.51565	0.52061	0.46747
																																					18	0.46349	0.43014	0.87546	1.00758	0.68589				18	0.48597	0.4655	0.47629
					Statistics - only period P1																																19	0.4574	0.5675	1.01532	1.15008	0.67816				19	0.44082	0.62428	0.42371
																																					20	0.49691	0.61747	1.01606	1.15732	0.78544				20	0.50162	0.60445	0.53725
					Normality Test:	Passed	(P = 0.437)																														21	0.46892	0.67884	1.012	1.03719	0.75194				21	0.46683	0.60633	0.44055
																																					22	0.50311	0.57982	1.0222	1.12559	0.74292				22	0.52894	0.54948	0.47163
					Equal Variance Test:	Passed	(P = 0.585)																														23	0.48549	0.63188	1.08477	1.18337	0.7073				23	0.60491	0.5664	0.55984
																																					24	0.45068	0.71751	1.09688	1.04259	0.7491				24	0.51387	0.51947	0.46619
					Group Name	N	Missing	Mean	Std Dev	SEM																											25	0.52773	0.65909	2.5512	1.0923	0.67085				25	0.41918	0.56581	0.42048
					preBotC to 7n	5	0	109.592	33.206	14.85																											26	0.49748	0.69134	0.95418	1.10663	0.67824				26	0.49999	0.56485	0.51068
					control	3	0	100.772	17.371	10.029																											27	0.49851	0.66652	1.02226	1.05559	0.7306				27	0.54889	0.64629	0.52275
																																					28	0.51743	0.62739	0.94589	1.04416	0.71834				28	0.49604	0.59251	0.47171
					Difference	8.82																															29	0.45724	0.68477	0.95405	1.11924	0.74491				29	0.41083	0.56388	0.47532
																																					30	0.48755	0.75399	0.90114	1.1709	0.74454				30	0.50477	0.66393	0.48259
					t = 0.418 with 6 degrees of freedom. (P = 0.691)																																31	0.42993	0.69262	0.88066	1.13911	0.72014				31	0.54459	0.62542	0.44491
																																					32	0.43613	0.67813	0.99497	1.13225	0.75248				32	0.55161	0.51549	0.47387
					95 percent confidence interval for difference of means: -42.837 to 60.478																																33	0.49689	0.79056	1.00904	1.1297	0.69898				33	1.12979	0.59648	0.45387
																																					34	0.49129	0.6503	1.00855	1.1398	0.70889				34	0.41683	0.62279	0.49464
																																					35	0.49689	0.57601	1.07967	1.08622	0.70907				35	0.48469	0.48202	0.4222
																																					36	0.4601	0.72205	1.07529	1.12887	0.65891				36	0.47747	0.56842	0.4917
																																					37	0.50946	0.70819	1.03804	1.07096	0.68267				37	0.59398	0.73689	0.43419
																																					38	1.0481	0.69539	1.02943	1.1346	1.41646				38	0.51175	0.59168	0.51739
																																					39	0.45231	0.65215	0.99147	1.06282	0.69808				39	0.52014	0.55642	0.49533
																																					40	0.44087	0.68383	0.95065	1.12339	0.63278				40	0.53621	0.581	0.54535
																																					41	0.4164	0.64906	0.9066	0.81253	0.64463				41	0.4774	0.44238	0.49575
																																					42	0.42811	0.60798	1.05925	1.00917	0.63117				42	0.44676	0.68203	0.52245
																																					43	0.48864	0.7359	0.99709	1.04872	0.60308				43	0.46328	0.64227	0.45688
																																					44	0.42376	0.70943	1.02975	1.07521	0.65208				44	0.47613	0.56583	0.46045
																																					45	0.4416	0.66147	0.97985	1.11124	1.17363				45	0.48543	0.50165	0.47403
																																					46	0.38746	0.63829	1.08956	0	0.63035				46	0.50281	0.54709	0.47271
																																					47	0.48964	0.70495	0.93921	0	0.55672				47	0.49927	0.45515	0.45792
																																					48	0.42265	0.74362	0	0	0.58464				48	0.58779	0.65815	0.40921
																																					49	0	0.73616	0	0	0.52956				49	0.55913	0.55757	0.44657
																																					50	0	0	0	0	0.60337				50	0.48223	0.57531	0.45048
																																					51	0	0	0	0	0.57846				51	0.5433	0.60131	0.41549
																																														52	0.56762	0.49146	0.46578
																																														53	0.52287	0.57672	0.43748
																																														54	0.618	0.61329	0.44969
																																														55		0.52397	0.39162
																																														56		0.53558	0.38081
																																														57		0.49929	0.44645
																																														58		0.54108	0.40535
																																														59		0.66146	0.46324
																																														60		0.48246	0.5483
																																														61			0.51827
																																														62			0.45749
																																														63			0.47536
																																														64			0.56821

## Sheet: HR preBotC to 7n
Two Way Analysis of Variance SigmaPlot v11				Analysis Summary				Mann-Whitney Analysis											DATA preBotC to 7n								DATA control						HR preBotC--7n						HR preBotC--7n
									Below threshold?	P value	Mean rank of GtACR2	Mean rank of control	Mean rank diff.	Mann-Whitney U	Adjusted P Value													HR
Two Way Analysis of Variance				Table Analyzed	HR			off	No	>0.999999	4.5	4.5	0	7.5	>0.999999				time	20210716A	20210716B	20210716C	20210914A	20210914B			time	20210917B	20210917C	20210917D			rats	off	P1	P2	off		rats	off	P1	P2	off
								P1	No	0.25	3.6	6	-2.4	3	>0.999999				0	150.732	169.787	141.12	146.586	82.8767			0	242.482	201.429	223.645			20210716A	156.246	162.645	151.671	220.306		20210716A	100	104.095	97.0723	141
Data source: Data 1 in HR - normality test				Column A	preBotC to 7n			P2	No	>0.999999	4.6	4.333	0.2667	7	>0.999999				1	147.069	228.26	143.992	137.142	84.4668			1	235.327	206.483	221.916			20210716B	197.965	154.298	211.716	257.785		20210716B	100	77.9419	106.947	130.217
				vs.	vs.			off2	No	0.785714	4.8	4	0.8	6	>0.999999				2	148.391	129.403	141.986	126.127	74.4735			2	237.974	122.41	221.741			20210716C	118.158	125.459	128.703	117.08		20210716C	100	106.18	108.925	99.0878
General Linear Model				Column B	control														3	141.093	158.272	142.528	134.249	78.7522			3	244.092	256.893	224.022			20210914A	138.666	139.474	145.37	189.989		20210914A	100	100.583	104.835	137.012
																			4	149.413	112.943	121.168	149.695	89.0704			4	247.305	212.206	224.548			20210914B	123.687	121.59	96.1713	233.79		20210914B	100	98.3044	77.7536	189.017
Dependent Variable: data				Test details															5	151.481	139.618	111.05	157.585	89.1967			5	241.448	217.117	222.751
				Test name	Mann-Whitney test														6	165.132	198.858	115.602	146.827	211.284			6	246.731	231.618	225.103
Normality Test:	Failed	(P < 0.050)		Comparison for each test	Compare ranks														7	140.223	201.919	122.71	137.557	158.95			7	252.819	246.593	220.843
				Multiple comparisons	Set P value threshold														8	150.599	200.898	120.647	141.142	89.2925			8	252.123	232.01	220.056
Equal Variance Test:	Passed	(P = 0.507)		Method	Bonferroni-Dunn method														9	160.589	197.009	116.153	148.529	84.9216			9	251.817	245.613	227.632			HR control						HR control
				Alpha	0.05														10	140.76	197.562	113.738	149.594	86.5943			10	251.012	236.772	227.49
																			11	152.411	200.587	111.244	152.66	91.2303			11	252.347	180.373	224.106			rats	off	P1	P2	off		rats	off	P1	P2	off
				Number of tests performed	4														12	155.216	198.632	112.569	148.735	92.1559			12	252.724	203.725	227.57			20210917B	252.115	254.587	259.381	280.513		20210917B	100	100.981	102.882	111.264
				Number of rows omitted	0														13	156.6	199.289	116.031	130.663	110.51			13	252.681	249.386	229.403			20210917C	186.92	206.279	188.629	277.675		20210917C	100	110.357	100.914	148.553
																			14	147.084	160.193	116.254	136.712	155.185			14	252.435	271.664	229.497			20210917D	229.728	239.847	242.991	257.38		20210917D	100	104.405	105.773	112.037
																			15	140.293	202.736	127.105	145.643	102.31			15	250.934	269.79	232.922
																			16	149.647	142.386	134.448	145.447	117.972			16	252.958	268.936	238.909
																			17	145.868	146.347	118.255	148.238	145.813			17	257.068	260.605	242.56
																			18	155.979	171.594	120.7	135.412	103.223			18	260.399	271.191	247.03
				Statistics - only period P1															19	209.639	209.602	134.113	130.188	95.9785			19	259.76	241.502	239.748
																			20	159.858	208.168	126.24	140.192	93.1637			20	260.924	259.814	238.716
				Normality Test:	Passed	(P = 0.090)													21	152.465	213.767	126.124	150.261	95.5051			21	256.357	269.788	242.972
																			22	149.926	207.788	120.795	153.799	96.2359			22	257.672	252.941	238.544
				Equal Variance Test:	Passed	(P = 0.623)													23	157.38	213.647	125.453	156.874	96.5072			23	256.824	243.981	240.696
																			24	146.114	212.615	113.535	143.304	166.61			24	258.864	305.417	243.549
				Group Name	N	Missing	Mean	Std Dev	SEM										25	154.838	201.879	118.778	145.26	152.598			25	254.843	258.304	237.605
				preBotC to 7n	5	0	97.421	11.308	5.057										26	157.433	209.07	100.579	159.908	97.8956			26	258.847	277.855	237.261
				control	3	0	105.247	4.744	2.739										27	154.763	213.005	110.987	163.78	96.461			27	285.6	266.634	237.104
																			28	158.057	213.93	114.892	156.465	97.0566			28	270.214	276.892	238.035
				Difference	-7.826														29	152.774	210.738	118.499	158.938	103.32			29	248.166	251.323	236.126
																			30	154.337	213.803	112.874	166.957	97.6457			30	266.724	264.482	235.537
				t = -1.113 with 6 degrees of freedom. (P = 0.308)															31	161.275	211.505	115.332	159.003	101.026			31	283.952	248.471	235.862
																			32	148.893	206.662	114.872	159.02	193.303			32	281.869	261.043	238.081
				95 percent confidence interval for difference of means: -25.036 to 9.383															33	157.484	213.543	116.206	159.904	218.129			33	277.19	270.616	238.076
																			34	161.391	217.988	113.769	185.002	117.505			34	212.022	238.208	243.032
																			35	171.919	213.527	111.907	189.034	174.978			35	221.383	242.742	242.452
																			36	218.269	206.707	119.263	189.879	200.928			36	227.32	253.045	242.13
																			37	193.957	218.449	124.672	187.529	200.339			37	275.969	261.268	239.659
																			38	186.686	199.378	123.776	174.535	117.705			38	281.81	237.103	245.293
																			39	134.786	225.425	158.965	183.28	178.479			39	292.244	288.965	243.813
																			40	134.887	256.951	119.538	186.73	196.275			40	296.911	250.973	256.398
																			41	145.134	255.542	116.719	148.885	210.928			41	297.909	265.195	247.912
																			42	152.872	252.456	118.67	150.045	220.943			42	288.836	195.789	247.633
																			43	171.246	240.628	117.459	166.281	223.816			43	280.319	299.773	243.724
																			44	165.568	264.954	119.477	165.741	224.112			44	285.498	255.687	240.542
																			45	159.31	261.82	120.689	185.411	223.863			45	290.409	282.492	236.797
																			46	162.989	268.074	140.14		98.5947			46	287.705	237.907	234.568
																			47	191.423	261.908	169.005		111.351			47	292.606	236.141	236.818
																			48	204.851	265.05			112.175			48	279.317	321.293	231.406
																			49		267.082			215.248			49	288.772	277.152	231.716
																			50					226.103			50	284.836	305.712	231.674
																			51					234.27			51	276.964	297.221	228.887
																											52	285.84	338.778	228.766
																											53	284.708	322.966	231.588
																											54	283.797	286.967	236.824
																											55		202.832	241.249
																											56		279.439	240.822
																											57		304.845	247.682
																											58		205.015	245.648
																											59		300.219	248.201
																											60		243.778	252.097
																											61			242.604
																											62			242.721
																											63			251.505
																											64			250.389

## Sheet: MP activity- preBotC to 7n
Normality and Lognormality test GraphPad					ANOVA results							Multiple Comparisons										DATA preBotC to 7n								DATA control
Test for normal distribution	preBotC to 7n	control																				AUC MP								AUC MP
					Table Analyzed	Two-way ANOVA , not RM						Compare each cell mean with the other cell mean in that row										rats	off	P1	P2	off				rats	off	P1	P2	off
Shapiro-Wilk test																						20210716A	0.0468386	0.103942	0.0457905	0.0603736				20210917B	0.067237	0.0629938	0.0656092	0.0538692
W	0.7865	0.9514			Two-way RM ANOVA	Matching: Stacked						Number of families	1									20210716B	0.0211979	0.0439049	0.0267593	0.0232569				20210917C	0.0400007	0.0433806	0.0477147	0.0473488
P value	0.0801	0.7247			Assume sphericity?	No						Number of comparisons per family	4									20210716C	0.0311626	0.0530725	0.0432488	0.0284389				20210917D	0.016463	0.0180966	0.0170194	0.0159308
Passed normality test (alpha=0.05)?	Yes	Yes			Alpha	0.05						Alpha	0.05									20210914A	0.042934	0.0998139	0.048814	0.0478285
P value summary	ns	ns																				20210914B	0.0375825	0.110617	0.0369321	0.0705702
					Source of Variation	% of total variation	P value	P value summary	Significant?	Geisser-Greenhouse's epsilon		Bonferroni's multiple comparisons test	Mean Diff.	95.00% CI of diff.	Below threshold?	Summary	Adjusted P Value
					Time x Column Factor	22.29	0.0002	***	Yes
					Time	29.17	0.0021	**	Yes	0.5119		preBotC to 7n - control
					Column Factor	16.33	0.0014	**	Yes			off	0
					Subject	3.158	0.5947	ns	No			p1	338.3	196.9 to 479.8	Yes	***	0.0006
												p2	51.49	-114.6 to 217.6	No	ns	>0.9999
					ANOVA table	SS	DF	MS	F (DFn, DFd)	P value		off2	62.63	-95.97 to 221.2	No	ns	0.7973					noise								noise
					Time x Column Factor	130997	3	43666	F (3, 18) = 11.05	P=0.0002
					Time	171388	3	57129	F (1.536, 9.215) = 14.45	P=0.0021												20210716A	0.0235903							20210917B	0.0191212
					Column Factor	95962	1	95962	F (1, 6) = 31.03	P=0.0014		Test details	Mean 1	Mean 2	Mean Diff.	SE of diff.	N1	N2	t	DF		20210716B	0.0157601							20210917C	0.0116969
					Subject	18554	6	3092	F (6, 18) = 0.7823	P=0.5947												20210716C	0.0253071							20210917D	0.014054
					Residual	71155	18	3953				preBotC to 7n - control										20210714A	0.0263218
												off	100	100	0	0	5	3				20210714B	0.0206026
					Difference between column means							p1	462	123.6	338.3	40.17	5	3	8.422	5.998
					Mean of preBotC to 7n	220.9						p2	167.1	115.7	51.49	41.02	5	3	1.255	4.447
					Mean of control	107.8						off2	154.7	92.03	62.63	42.7	5	3	1.467	5.281
					Difference between means	113.1
					SE of difference	20.31
					95% CI of difference	63.43 to 162.8																DATA preBotC to 7n								DATA control
																						AUC MP								AUC MP
					Data summary																	rats	off	P1	P2	off				rats	off	P1	P2	off
					Number of columns (Column Factor)	2																20210716A	0.0232483	0.080352	0.0222001	0.0367832				20210917B	0.0481158	0.0438726	0.046488	0.034748
					Number of rows (Time)	4																20210716B	0.00543775	0.0281448	0.0109992	0.0074968				20210917C	0.0283038	0.0316837	0.0360179	0.035652
					Number of subjects (Subject)	8																20210716C	0.00585555	0.0277654	0.0179417	0.00313182				20210917D	0.00240895	0.00404256	0.00296537	0.0018767
																						20210914A	0.0166122	0.0734921	0.0224922	0.0215067
																						20210914B	0.0169799	0.0900145	0.0163295	0.0499676
					Statistics - only period P1
																						DATA preBotC to 7n								DATA control
					ormality Test:	Passed	(P = 0.481)															AUC MP								AUC MP
																						rats	off	P1	P2	off				rats	off	P1	P2	off
					Equal Variance Test:	Passed	(P = 0.482)															20210716A	100	345.625	95.4914	158.219				20210917B	100	91.1813	96.6169	72.2174
																						20210716B	100	517.582	202.274	137.866				20210917C	100	111.942	127.254	125.962
					Group Name	N	Missing	Mean	Std Dev	SEM												20210716C	100	474.172	306.405	53.4846				20210917D	100	167.815	123.098	77.9056
					preBotC to 7n	5	0	461.98	73.834	33.019												20210914A	100	442.4	135.396	129.463
					control	3	0	123.646	39.635	22.883												20210914B	100	530.124	96.1694	294.275
					Difference	338.335
					t = 7.185 with 6 degrees of freedom. (P = <0.001)
					95 percent confidence interval for difference of means: 223.107 to 453.562
