# Supplementary material for: Selective transduction and photoinhibition of pre-Bötzinger complex neurons that project to the facial nucleus in rats affects nasofacial activity
Source: eLife. 2023 Sep 29;12:e85398. doi: 10.7554/eLife.85398 (PMC10653671; doi:10.7554/eLife.85398)
Supplement: Figure 9—source data 1. [file elife-85398-fig9-data1.xlsx]

## Sheet: fR - mix vs control
Two Way Analysis of Variance SigmaPlot v11					Analysis Summary				Mann-Whitney Analysis											DATA mix Dio-GtACR2+cre									DATA control								fR GtACr2-GFP						fR GtACr2-GFP
										Below threshold?	P value	Mean rank of 50 HZ mix	Mean rank of control	Mean rank diff.	Mann-Whitney U	Adjusted P Value				fR									fR
Two Way Analysis of Variance					Table Analyzed	fR			off	No	>0.999999	4.5	4.5	0	7.5	>0.999999				time	20210715A	20210715C	20210715D	20210713A	20210713B				time	20210917B	20210917C	20210917D					rats	basal	P1	P2	recovery		rats	basal	P1	P2	recovery
									P1	No	0.017857	3	7	-4	0	0.071429				0	180.538	231.282	169.665	185.544	247.565				0	283.347	166.129	349.65					20210715A	192.791	0	86.1281	236.16		20210715A	100	0	44.6743	122.495
Data source: Data 1 in fR - normality test					Column A	50 HZ mix			P2	No	0.035714	3	7	-4	0	0.142857				1	234.282	202.597	303.958	141.296	184.509				1	262.439	165.283	404.887					20210715C	261.361	0	129.102	128.691		20210715C	100	0	49.396	49.2389
					vs.	vs.			off 2	No	0.571429	4	5.333	-1.333	5	>0.999999				2	212.144	228.865	170.561	201.265	258.611				2	329.575	204.704	339.992					20210715D	221.558	0	180	193.605		20210715D	100	0	81.2428	87.3833
General Linear Model					Column B	control														3	256.207	212.597	190.2	237.116	262.843				3	282.588	180.637	298.501					20210713A	250.757	0	157.441	190.1		20210713A	100	0	62.7861	75.8105
																				4	215.794	206.461	233.65	193.023	303.561				4	275.784	178.358	216.185					20210713B	241.2	0	163.998	223.932		20210713B	100	0	67.9925	92.8408
Dependent Variable: data					Test details															5	231.25	274.308	220.764	115.81	207.438				5	279.968	157.465	307.832
					Test name	Mann-Whitney test														6	229.43	198.78	188.135	194.739	277.362				6	262.306	191.083	236.403
Normality Test:	Failed	(P < 0.050)			Comparison for each test	Compare ranks														7	221.991	259.781	214.316	121.87	256.024				7	256.43	159.687	301.235					fR control						fR control
					Multiple comparisons	Set P value threshold														8	179.894	245.765	217.435	221.547	208.851				8	234.995	187.692	263.042
Equal Variance Test:	Passed	(P = 0.506)			Method	Bonferroni-Dunn method														9	244.309	231.984	297.535	241.88	216.164				9	299.054	170.386	302.799					rats	basal	P1	P2	recovery		rats	basal	P1	P2	recovery
					Alpha	0.05														10	197.423	279.037	140.274	190.762	276.381				10	242.234	160.491	344.498					20210917B	274.953	255.357	274.971	243.429		20210917B	100	92.873	100.007	88.5348
																				11	203.981	238.67	297.063	159.344	220.416				11	278.662	176.729	241.478					20210917C	175.926	138.78	147.691	193.189		20210917C	100	78.8852	83.9504	109.813
					Number of tests performed	4														12	216.633	271.871	230.846	107.825	133.61				12	360.18	177.302	258.534					20210917D	341.887	316.427	335.534	311.503		20210917D	100	92.5531	98.1418	91.1131
					Number of rows omitted	0														13	185.512	261.128	263.638	176.335	304.992				13	260.916	179.186	362.206
																				14	202.41	243.172	220.673	261.593	275.702				14	310.94	185.334	392.741
																				15	186.251	129.495	174.128	226.537	247.026				15	277.707	163.712	332.203
																				16	0	0	0	0	0				16	329.471	139.858	292.099
					Statistics - only P1 period															17	0	0	0	0	0				17	330.239	134.432	305.007
																				18	0	0	0	0	0				18	317.083	147.73	291.818
					Normality Test:	Failed	(P < 0.050)													19	0	0	0	0	0				19	296.964	142.646	363.008
																				20	0	0	0	0	0				20	264	180.451	358.072
																				21	0	0	0	0	0				21	322.748	175.728	263.572
					Test execution ended by user request, Rank Sum Test begun															22	0	0	0	0	0				22	278.83	181.285	354.485
																				23	0	0	0	0	0				23	274.084	171.999	324.766
					Mann-Whitney Rank Sum Test	Thursday, November 24, 2022, 10:16:14 AM														24	0	0	0	0	0				24	267.468	221.28	403.66
																				25	0	0	0	0	0				25	261.102	151.375	279.663
					Data source: Data 1 in Notebook6															26	73.654	0	0	63.0744	0				26	210.084	177.456	305.948
																				27	79.7081	0	0	92.4204	0				27	269.652	167.427	385.074
					Group	N	Missing	Median	0.25	0.75										28	79.5155	0	0	51.0774	0				28	254.83	146.415	340.348
					mix GtACR2+cre	5	0	0	0	0										29	48.4464	0	4.77688	88.6932	0				29	214.598	127.567	318.583
					control	3	0	92.553	82.302	92.793										30	107.422	4.56992	39.4568	63.3919	0				30	258.458	119.401	315.508
																				31	98.0237	131.801	70.7883	48.3582	0				31	294.42	116.502	369.823
					Mann-Whitney U Statistic= 0.000															32	47.1495	117.296	138.024	49.3241	0				32	297.429	129.394	328.656
																				33	36.7912	160.328	80.0211	171.137	126.943				33	219.507	121.711	294.672
					T = 21.000 n(small)= 3 n(big)= 5 P(est.)= 0.017 P(exact)= 0.036															34	26.4328	237.207	120.936	130.2	147.843				34	283.396	261.892	381.841
																				35	143.266	220.21	119.971	174.855	143.669				35	339.299	218.659	325.226
																				36	81.4067	216.565	244.394	151.877	165.728				36	344.624	211.473	326.788
		a																		37	52.8035	250.544	163.288	125.42	193.74				37	300.974	234	319.827
																				38	135.382	218.875	162.38	251.938	177.368				38	321.638	187.426	323.987
																				39	104.606	257.595	117.078	136.026	138.455				39	287.613	176.116	323.378
																				40	233.009	251.543	87.0118	62.8362	157.823				40	325.391	194.274	425.555
																				41	212.885	260.775	160.939	47.6707	168.38				41	322.272	183.224	446.601
																				42	240.808	220.909	85.3532	50.4474	168.172				42	301.762	153.964	335.911
																				43	208.697	188.665	102.694	80.8299	145.872				43	230.517	193.418	495.209
																				44	260.201	138.3	80.3021	189.469	145.347				44	324.688	155.455	348.896
																				45	228.716	123.163	172.136	173.999	147.935				45	299.877	253.086	319.222
																				46	223.905	132.345	151.774	175.901	147.2				46	351.637	219.655	394.052
																				47	248.498	116.142	90.9389	156.466	137.595				47	305.15	218.397	278.944
																				48	183.462	89.7328	189.997	193.331	138.322				48	241.337	192.889	335.185
																				49	146.543	101.826	136.923	167.907	124.615				49	239.613	170.389	407.575
																				50	144.235	82.6144	345.185	198.951	114.733				50	256.829	128.024	320.936
																				51	199.417	91.8624	148.537	202.694	154.706				51	221.722	181.301	319.542
																				52	135.77	98.5798	198.143	191.91	160.578				52	313.76	140.956	217.301
																				53	251.176	132.703	214.486	174.043	146.491				53	315.745	175.11	340.696
																				54	216.955	154.826	170.057	189.407	154.405				54	309.493	208.304	249.592
																				55	214.915	124.975	133.426	142.637	205.621				55	374.937	244.233	282.24
																				56		106.612	117.215	110.493	183.152				56	358.729	232.981	266.044
																				57		131.983	184.997	144.816	200.784				57	322.669	199.317	295.915
																				58		133.777	200.127	151.661	239.975				58	342.173	199.657	274.17
																				59			272.109	101.367	190.98				59	316.967	174.838	249.932
																				60			192.73	188.099	211.095				60	321.22	205.226	220.469
																				61			192.73	164.942	251.755				61	282.538	187.992	293.058
																				62				222.237	224.778				62	238.032	191.57	231.197
																				63				199.984	236.591				63	351.538	152.297	256.099
																				64					230.445				64	250.558	194.223
																				65					192.091				65		206.485
																				66					171.692				66		128.612
																				67					142.41				67		185.994
																				68					137.909				68		241.593
																				69					123.025				69		200.564
																				70					131.09				70		134.338
																				71					109.582				71
																				72					149.131				72
																				73					172.911				73
																				74					148.463				74
																				75									75

## Sheet: DIA activity (AUC) mix vs contr
Two Way Analysis of Variance SigmaPlot v11					Analysis Summary				Mann-Whitney Analysis											DATA mix Dio-GtACR2+cre									DATA control								DATA mix Dio-GtACR2+cre									DATA control
										Below threshold?	P value	Mean rank of GtACR2	Mean rank of control	Mean rank diff.	Mann-Whitney U	Adjusted P Value				AUC DIA									AUC DIA								DIA amplitude									DIA amplitude
Two Way Analysis of Variance					Table Analyzed	DIA data			off	No	>0.999999	4.5	4.5	0	7.5	>0.999999				rats	off	P1	P2	off					rats	off	P1	P2	off				time	20210715A	20210715C	20210715D	20210713A	20210713B				time	20210917B	20210917C	20210917D
									P1	No	0.142857	3.4	6.333	-2.933	2	0.571429				20210715A	0.0618695	0.045393	0.0713665	0.0742368					20210917B	0.0448498	0.0405181	0.0427058	0.0477443				0	1.29133	1.07447	0.58168	0.94024	0.62045				0	0.5892	0.69218	0.2652
Data source: Data 1 in DIA activity					Column A	GtACR2-DIO + cre			P2	No	>0.999999	4.4	4.667	-0.2667	7	>0.999999				20210715C	0.0615305	0.0645402	0.0710211	0.0721971					20210917C	0.104258	0.113671	0.145202	0.113932				1	1.10706	1.08765	0.5335	0.97396	0.549				1	0.61894	0.51891	0.32058
					vs.	vs.			off 2	No	0.785714	4.2	5	-0.8	6	>0.999999				20210715D	0.0350244	0.00718127	0.0268387	0.0405883					20210917D	0.0308998	0.0321473	0.0301288	0.0464535				2	1.12989	1.01142	0.52852	1.22856	0.66044				2	0.47166	0.62197	0.34281
General Linear Model					Column B	control														20210713A	0.0782298	0.0402438	0.191999	0.0807569													3	0.97314	1.05131	0.5057	1.30593	0.67324				3	0.56187	0.55489	0.24543
																				20210713B	0.0656469	0.0365118	0.0249206	0.0580921													4	1.10753	1.12408	0.43502	1.12796	0.67762				4	0.5897	0.53359	0.25496
Dependent Variable: Col 3					Test details																																5	1.02299	0.89538	0.528	1.19311	0.58177				5	0.61222	0.66885	0.2583
					Test name	Mann-Whitney test																															6	1.18477	0.90285	0.53985	1.19041	0.67166				6	0.55845	0.63536	0.38811
Normality Test:	Failed	(P < 0.050)			Comparison for each test	Compare ranks																															7	1.03916	1.04829	0.52806	1.35421	0.72746				7	0.58893	0.58901	0.4088
					Multiple comparisons	Set P value threshold																															8	1.29203	1.08025	0.611	1.19245	0.56347				8	0.48696	0.59567	0.46918
Equal Variance Test:	Passed	(P = 0.394)			Method	Bonferroni-Dunn method																															9	1.30866	1.03694	0.6141	1.29883	0.91203				9	0.54274	0.6106	0.4926
					Alpha	0.05														DATA mix Dio-GtACR2+cre									DATA control								10	0.95833	1.07158	0.51335	1.27774	0.62643				10	0.42121	0.41596	0.36443
																				AUC DIA									AUC DIA								11	0.97296	0.79845	0.43092	1.21877	0.75314				11	0.59349	0.68037	0.40391
					Number of tests performed	4														rats	off	P1	P2	off					rats	off	P1	P2	off				12	1.04875	0.98412	0.46279	1.26401	0.60215				12	0.5036	0.72052	0.36587
					Number of rows omitted	0														20210715A	100	73.369	115.35	119.989					20210917B	100	90.3418	95.2195	106.454				13	0.92693	1.0412	0.37845	1.36664	0.51549				13	0.43864	0.69384	0.26049
																				20210715C	100	104.891	115.424	117.336					20210917C	100	109.028	139.271	109.278				14	0.89216	1.20456	0.47255	1.07366	0.77661				14	0.53616	0.58284	0.45946
																				20210715D	100	20.5036	76.6285	115.886					20210917D	100	104.037	97.5049	150.336				15	0.87004	1.30199	0.53977	1.07792	1.04851				15	0.50301	0.61148	0.42795
																				20210713A	100	51.4431	245.43	103.23													16	0.377973	0.591664	0.0244	0.324739	0.151456				16	0.44409	0.50542	0.40968
					Statistics - only P1 period															20210713B	100	55.6185	37.9615	88.4917													17	0.208297	0.494928	0.0244	0.483339	0.117992				17	0.49627	0.46331	0.33508
																																					18	0.132755	0.411926	0.0244	0.556708	0.119948				18	0.39353	0.59944	0.28118
																																					19	0.113242	0.37009	0.0244	0.560404	0.117423				19	0.40004	0.57329	0.3417
					Normality Test:	Passed	(P = 0.725)																														20	0.191625	0.398507	0.0244	0.549528	0.118511				20	0.3728	0.52919	0.38609
																																					21	0.19682	0.399892	0.0244	0.502435	0.117164				21	0.42337	0.61687	0.38063
					Equal Variance Test:	Passed	(P = 0.316)																														22	0.120444	0.419942	0.0244	0.496721	0.115222				22	0.52785	0.68435	0.35976
																																					23	0.143622	0.474322	0.0244	0.466588	0.111032				23	0.39283	0.64583	0.2728
					Group Name	N	Missing	Mean	Std Dev	SEM																											24	0.162641	0.412694	0.0244	0.410901	0.107131				24	0.50224	0.65637	0.23608
					mix GtACR2+cre	5	0	61.165	30.982	13.856																											25	0.389218	0.449299	0.0244	0.439666	0.107635				25	0.44195	0.62285	0.28672
					control	3	0	101.136	9.675	5.586																											26	0.75607	0.453145	0.0244	1.15097	0.109944				26	0.47847	0.6626	0.25074
																																					27	0.78209	0.49673	0.0244	2.93629	0.10302				27	0.413	0.67358	0.37178
					Difference	-39.971																															28	0.6983	0.570143	0.0244	4.17972	0.108729				28	0.41342	0.56035	0.31286
																																					29	0.84181	0.692169	0.24938	3.1165	0.112302				29	0.40835	0.58842	0.27502
					t = -2.113 with 6 degrees of freedom. (P = 0.079)																																30	1.17533	1.12153	0.39478	2.78725	0.123452				30	0.48367	0.6522	0.26701
																																					31	0.77766	1.11773	0.3974	2.86496	0.122323				31	0.44126	0.75149	0.26905
					95 percent confidence interval for difference of means: -86.264 to 6.323																																32	0.65537	1.10295	0.47126	1.64607	0.160313				32	0.5118	0.70034	0.27788
																																					33	0.77759	0.77006	0.39492	1.0692	0.34006				33	0.37166	0.79306	0.26847
																																					34	0.89982	1.04838	0.36555	0.79635	0.38226				34	0.49958	0.6788	0.26178
																																					35	0.926	1.02413	0.37725	0.95275	0.42446				35	0.45992	0.78845	0.28021
																																					36	2.51409	0.88817	0.38764	0.9341	0.46665				36	0.51948	0.7733	0.27676
																																					37	1.62531	1.06395	0.49128	0.99557	0.50885				37	0.45965	0.7991	0.27354
																																					38	0.81235	1.00946	0.3981	0.97327	0.49606				38	0.40791	0.68485	0.33196
																																					39	1.04873	0.86574	0.46862	0.65695	0.70467				39	0.5672	0.58062	0.33155
																																					40	1.09945	1.07665	0.54245	1.36124	0.50424				40	0.47167	0.58197	0.2999
																																					41	1.32053	1.05157	0.52302	1.47806	0.45255				41	0.4455	0.55357	0.35209
																																					42	1.02514	1.05851	0.45162	1.31795	0.43154				42	0.4248	0.53241	0.36095
																																					43	1.14369	1.10801	0.52516	1.51688	0.42941				43	0.40755	0.44374	0.44006
																																					44	1.38265	0.91657	0.52123	1.386	0.39602				44	0.43623	0.39568	0.40644
																																					45	1.16435	1.1077	0.45273	1.40822	0.42495				45	0.46605	0.40201	0.43982
																																					46	1.26002	1.07696	0.5129	1.11177	0.36071				46	0.38965	0.56404	0.39281
																																					47	1.21821	0.94287	0.58315	0.94178	0.34963				47	0.33364	0.46431	0.30865
																																					48	0.95505	1.01093	0.45689	1.18489	0.48104				48	0.39561	0.55434	0.31527
																																					49	1.32249	0.99875	0.4613	1.19456	1.92641				49	0.44357	0.59394	0.32252
																																					50	0.9697	1.04817	0.57531	1.35048	0.64197				50	0.42574	0.6286	0.32227
																																					51	0.97634	0.99786	0.58184	1.2165	0.71309				51	0.47667	0.61559	0.54068
																																					52	1.08804	1.0257	0.56836	1.05497	0.77033				52	0.49445	0.70644	0.50168
																																					53	1.16331	1.07494	0.48936	1.10457	0.62967				53	0.32238	0.74686	0.43784
																																					54	0.92443	1.06174	0.52687	1.08827	0.62173				54	0.4856	0.76466	0.30146
																																					55	0.98991	1.02884	0.62853	1.08126	0.61424				55	0.53991	0.6249	0.43419
																																					56		1.07193	0.50817	0.82741	0.89079				56	0.44503	0.51927	0.40479
																																					57		0.99725	0.62763	1.15253	1.22847				57	0.46935	0.6995	0.54948
																																					58		0.92016	0.56611	0.97439	1.34727				58	0.49468	0.65302	0.377
																																					59			0.55406	1.02547	0.86992				59	0.47931	0.89287	0.4939
																																					60			0.50237	1.07749	0.73207				60	0.43929	0.77486	0.52871
																																					61			0.42826	1.1673	0.90547				61	0.40119	0.71505	0.40113
																																					62				1.04276	0.70883				62	0.36769	0.72847	0.48519
																																					63				1.13966	0.95097				63	0.33458	0.75814	0.46088
																																					64					0.67295				64	0.49117	0.64152
																																					65					0.63276				65		0.57757
																																					66					0.65374				66		0.67572
																																					67					0.64361				67		0.68927
																																					68					0.58834				68		0.67103
																																					69					0.6006				69		0.7077
																																					70					0.59425				70		0.64335
																																					71					0.5159				71
																																					72					0.5528				72
																																					73					0.47506				73
																																					74					0.56043				74
																																					75									75

## Sheet: HR - mix vs control
Two Way Analysis of Variance SigmaPlot v11					Analysis Summary				Mann-Whitney Analysis												DATA mix Dio-GtACR2+cre								DATA control						HR GtACr2-GFP						HR GtACr2-GFP
										Below threshold?	P value	Mean rank of GtACR2	Mean rank of control	Mean rank diff.	Mann-Whitney U	Adjusted P Value					HR									HR
wo Way Analysis of Variance	Tuesday, November 22, 2022, 10:35:16 PM				Table Analyzed	HR			off	No	>0.999999	4.5	4.5	0	7.5	>0.999999					time	20210715A	20210715C	20210715D	20210713A	20210713B			time	20210917B	20210917C	20210917D			rats	basal	P1	P2	5 cycles after stim		rats	basal	P1	P2	5 cycles after stim
									P1	No	0.392857	3.8	5.667	-1.867	4	>0.999999					0	349.445	307.238	309.072	304.45	295.654			0	194.439	349.876	380.221			20210715A	350.437	335.502	331.276	326.845		20210715A	100	95.7382	94.5324	93.268
Data source: Data 1 in HR - normality test					Column A	50 HZ mix			P2	No	0.392857	3.8	5.667	-1.867	4	>0.999999					1	344.419	260.018	320.586	322.987	282.509			1	243.788	347.332	387.77			20210715C	285.775	279.284	286.576	289.001		20210715C	100	97.7284	100.28	101.129
					vs.	vs.			off 2	No	0.25	3.6	6	-2.4	3	>0.999999					2	329.653	296.534	306.95	287.463	310.993			2	242.684	362.085	380.472			20210715D	340.976	337.596	312.667	323.094		20210715D	100	99.0088	91.6977	94.7557
General Linear Model					Column B	control															3	328.779	295.189	317.286	290.917	299.033			3	270.272	352.134	385.906			20210713A	278.407	355.41	289.869	303.608		20210713A	100	127.659	104.117	109.052
																					4	338.137	298.787	323.208	276.246	301.021			4	264.498	355.947	386.788			20210713B	340.424	324.528	297.213	313.724		20210713B	100	95.3308	87.3067	92.1568
Dependent Variable: data					Test details																5	335.925	290.805	335.542	295.132	357.215			5	258.399	325.688	388.619
					Test name	Mann-Whitney test															6	336.52	288.173	336.017	295.756	328.328			6	270.01	342.576	392.842
Normality Test:	Failed	(P < 0.050)			Comparison for each test	Compare ranks															7	340.304	314.305	342.736	275.765	379.403			7	270.445	329.941	385.881
					Multiple comparisons	Set P value threshold															8	345.212	286.093	343.622	313.733	307.485			8	261.706	347.035	388.122			HR control						HR control
Equal Variance Test:	Passed	(P = 0.819)			Method	Bonferroni-Dunn method															9	331.543	292.653	338.395	303.684	307.665			9	269.011	338.5	390.39
					Alpha	0.05															10	330.77	334.371	335.074	264.52	308.114			10	255.927	352.581	380.631			rats	basal	P1	P2	5 cycles after stim		rats	basal	P1	P2	5 cycles after stim
																					11	343.375	299.539	336.731	280.919	305.55			11	260.463	323.835	389.591			20210917B	252.642	247.592	262.879	257.273		20210917B	100	98.001	104.052	101.833
					Number of tests performed	4															12	351.379	276.139	343.241	285.771	316.387			12	267.842	333.993	388.677			20210917C	340.66	342.088	352.507	355.403		20210917C	100	100.419	103.478	104.328
					Number of rows omitted	0															13	346.959	289.145	339.209	292.573	375.118			13	259.492	335.06	385.008			20210917D	388.099	391.881	380.941	394.592		20210917D	100	100.974	98.1557	101.673
																					14	349.025	290.694	332.623	291.816	303.593			14	261.49	351.856	390.181
																					15	350.532	277.292	334.721	230.812	381.048			15	253.817	339.555	393.949
																					16	341.485	297.08	343.513	316.991	315.644			16	243.959	338.242	392.881
																					17	333.931	284.68	335.657	296.98	327.114			17	257.018	354.306	391.192
					Statistics - only P1 period																18	335.862	275.93	333.986	318.799	331.418			18	252.149	358.483	391.625
																					19	346.823	279.043	339.816	332.068	329.433			19	248.944	347.789	374.968
					Normality Test:	Failed	(P < 0.050)														20	343.017	277.231	336.359	329.789	329.893			20	265.659	355.742	392.908
																					21	344.906	281.441	328.399	331.591	330.611			21	259.588	348.759	392.659
																					22	333.986	269.263	326.027	312.657	323.612			22	272.063	338.86	398.785
					Test execution ended by user request, Rank Sum Test begun																23	342.127	273.026	330.199	322.572	321.106			23	263.618	325.792	388.229
																					24	336.273	269.951	329.395	319.195	306.534			24	269.837	342.773	366.38
					Mann-Whitney Rank Sum Test	Thursday, November 24, 2022, 10:19:01 AM															25	334.8	267.4	325.193	277.123	297.469			25	241.346	343.648	380.231
																					26	312.444	262.211	330.292	332.278	285.436			26	254.068	343.093	366.166
					Data source: Data 1 in DIA - P1 period																27	337.212	267.831	331.953	331.781	286.744			27	257.445	338.802	389.198
																					28	338.621	277.13	328.488	327.962	382.316			28	250.824	348.683	376.733
					Group	N	Missing	Median	0.25	0.75											29	335.003	297.877	329.141	312.3	296.167			29	258.441	357.846	387.127
					mix GtACR2+cre	5	0	97.728	95.636	106.171											30	337.209	262.806	321.415	301.786	380.208			30	261.931	358.083	391.866
					control	3	0	100.419	98.606	100.836											31	317.734	304.485	315.202	290.735	276.33			31	258.236	359.799	392.112
																					32	340.575	286.449	312.936	311.535	243.53			32	258.421	360.675	386.717
					Mann-Whitney U Statistic= 4.000																33	340.089	291.618	311.489	295.539	300.825			33	255.512	353.512	385.764
																					34	325.635	277.986	307.189	265.654	297.774			34	257.779	349.448	379.291
					T = 17.000 n(small)= 3 n(big)= 5 P(est.)= 0.371 P(exact)= 0.393																35	319.224	287.531	309.99	279.292	299.124			35	255.874	349.639	381.1
																					36	300.872	340.156	306.278	318.591	301.451			36	253.405	353.175	390.57
																					37	317.493	297.388	300.905	295.573	297.287			37	245.528	352.38	391.831
																					38	329.367	268.971	309.435	296.606	287.751			38	250.774	332.383	382.665
																					39	324.042	282.497	298.235	304.539	303.604			39	257.363	349.025	384.151
																					40	328.413	297.197	291.109	330.889	295.394			40	253.165	342.841	388.332
																					41	317.793	286.112	291.582	309.421	301.123			41	238.227	334.997	380.58
																					42	319.168	291.097	287.607	328.756	295.96			42	245.064	327.348	381.067
																					43	327.794	333.382	290.098	320.756	295.635			43	250.596	344.585	387.703
																					44	327.288	289.77	296.573	232.808	290.843			44	250.313	347.464	389
																					45	334.4	300.896	313.747	220.459	290.968			45	258.916	352.886	383.604
																					46	323.809	289.869	309.703	214.303	280.636			46	251.771	345.491	385.106
																					47	340.612	296.075	315.942	210.436	273.656			47	257.24	323.883	392.018
																					48	345.358	278.051	312.82	210.514	277.846			48	251.525	337.127	385.803
																					49	345.47	289.2	319.208	207.829	338.956			49	257.224	350.313	375.24
																					50	344.312	269.477	308.784	238.057	296.083			50	258.73	340.095	392.026
																					51	321.18	274.572	321.431	312.033	303.318			51	257.583	368.122	395.681
																					52	342.206	240.205	321.031	278.86	305.623			52	251.366	347.413	391.229
																					53	334.724	273.267	324.938	284.979	310.553			53	249.327	354.08	397.638
																					54	329.172	286.359	320.124	313.423	305.743			54	249.975	361.35	376.852
																					55	346.833	280.853	334.613	307.025	303.877			55	255.411	347.738	398.916
																					56		290.133	334.132	303.957	391.729			56	253	343.245	359.772
																					57		269.97	337.915	306.563	224.91			57	253.218	357.122	353.811
																					58		296.082	334.938	311.458	373.166			58	246.536	353.762	395.973
																					59			327.837	266.191	351.458			59	247.851	353.04	383.674
																					60			334.12	298.512	374.447			60	243.415	354.672	369.894
																					61			334.278	273.323	336.198			61	232.88	358.455	365.368
																					62				288.847	269.376			62	246.888	355.375	391.537
																					63				283.662	312.739			63	252.945	361.709	380.518
																					64					287.361			64	246.801	363.659
																					65					301.873			65		363.396
																					66					289.093			66		347.456
																					67					200.143			67		362.171
																					68					250.609			68		363.513
																					69					281.641			69		363.922
																					70					199.591			70		359.355
																					71					241.961			71
																					72					247.842
																					73					287.889
																					74					227.1

## Sheet: MP Activity (AUC) mix vs contro
Two Way Analysis of Variance SigmaPlot v11					Analysis Summary				Mann-Whitney Analysis											DATA mix Dio-GtACR2+cre								DATA control
										Below threshold?	P value	Mean rank of 50 HZ mix	Mean rank of control	Mean rank diff.	Mann-Whitney U	Adjusted P Value				AUC MP								AUC MP
Two Way Analysis of Variance					Table Analyzed	MP activity			off	No	>0.999999	4.5	4.5	0	7.5	>0.999999				rats	off	P1	P2	off				rats	off	P1	P2	off
									P1	No	0.571429	5	3.667	1.333	5	>0.999999				20210715A	0.0285791	0.0315134	0.0336115	0.0228841				20210917B	0.108214	0.108165	0.102093	0.111537
Data source: Data 1 in MP activity					Column A	GtACR2-DIO + cre			P2	No	>0.999999	4.6	4.333	0.2667	7	>0.999999				20210715C	0.0238276	0.0192066	0.0229101	0.0212448				20210917C	0.055989	0.0625385	0.0782709	0.0965591
					vs.	vs.			off 2	No	0.035714	3	7	-4	0	0.142857				20210715D	0.0271522	0.0417218	0.0268387	0.0234054				20210917D	0.0241261	0.0314471	0.0262279	0.0326624
General Linear Model					Column B	control														20210713A	0.161482	0.305903	0.258164	0.0812116
																				20210713B	0.111993	0.141493	0.156532	0.0913379
Dependent Variable: data					Test details
					Test name	Mann-Whitney test
Normality Test:	Failed	(P < 0.050)			Comparison for each test	Compare ranks
					Multiple comparisons	Set P value threshold
Equal Variance Test:	Passed	(P = 0.107)			Method	Bonferroni-Dunn method														noise								noise
					Alpha	0.05														20210715A	0.0137713							20210917B	0.01106
																				20210715C	0.0120081							20210917C	0.019701
					Number of tests performed	4														20210715D	0.0173638							20210917D	0.00957337
					Number of rows omitted	0														20210713A	0.0130043
																				20210713B	0.0132131
					Statistics - only P1 period
					Normality Test:	Passed	(P = 0.906)													DATA mix Dio-GtACR2+cre								DATA control
																				AUC MP								AUC MP
					Equal Variance Test:	Passed	(P = 0.289)													rats	off	P1	P2	off				rats	off	P1	P2	off
																				20210715A	0.0148079	0.0177422	0.0198402	0.00911289				20210917B	0.0971544	0.0971052	0.091033	0.100477
					Group Name	N	Missing	Mean	Std Dev	SEM										20210715C	0.0118194	0.00719845	0.010902	0.00923665				20210917C	0.036288	0.0428375	0.0585699	0.0768581
					mix GtACR2+cre	5	0	151.339	72.888	32.596										20210715D	0.00978835	0.0243579	0.00947485	0.00604159				20210917D	0.0145527	0.0218737	0.0166545	0.0230891
					control	3	0	122.768	25.508	14.727										20210713A	0.148478	0.292898	0.24516	0.0682073
																				20210713B	0.0987796	0.12828	0.143319	0.0781248
					Difference	28.571
					t = 0.638 with 6 degrees of freedom. (P = 0.547)
					95 percent confidence interval for difference of means: -80.984 to 138.126
																				DATA mix Dio-GtACR2+cre								DATA control
																				AUC MP								AUC MP
																				rats	off	P1	P2	off				rats	off	P1	P2	off
																				20210715A	100	119.816	133.984	61.5408				20210917B	100	99.9493	93.6992	103.42
																				20210715C	100	60.9034	92.2377	78.1479				20210917C	100	118.049	161.403	211.8
																				20210715D	100	248.846	96.7973	61.7222				20210917D	100	150.307	114.443	158.658
																				20210713A	100	197.267	165.115	45.9377
																				20210713B	100	129.865	145.09	79.0901

## Sheet: apnea duration mix
DATA GtACr2-GFP					DATA control				apnea duration				missed resp cycles
	apnea duration	1 resp cycle	missed res cycles		rats	apnea duration	missed res cycles		Column B	control			Column B	control
20210715A	9.76	0.3234	30.1793		20210917B	0	0		vs.	vs.			vs.	vs.
20210715C	13.6979	0.25068	54.643		20210917C	0	0		Column A	GtACR2+CRE			Column A	GtACR2+CRE
20210715D	13.2624	0.3219	41.2004		20210917D	0	0
20210713A	10.2821	0.2398	42.8776						Unpaired t test with Welch's correction				Unpaired t test
20210713B	17.4669	0.22542	77.4858						P value	0.0004			P value	0.0037
									P value summary	***			P value summary	**
									Significantly different (P < 0.05)?	Yes			Significantly different (P < 0.05)?	Yes
average	12.8938		49.2772						One- or two-tailed P value?	Two-tailed			One- or two-tailed P value?	Two-tailed
SD	3.09585		17.9961						Welch-corrected t, df	t=6.985, df=6			t, df	t=4.592, df=6
confidence 95%	3.84385		22.3472
bottom limit	9.05		26.93						How big is the difference?				How big is the difference?
upper limit	16.74		71.62						Mean of column A	12.89			Mean of column A	49.28
n	5		5						Mean of column B	0			Mean of column B	0
									Difference between means (B - A) ± SEM	-12.89 ± 1.846			Difference between means (B - A) ± SEM	-49.28 ± 10.73
									95% confidence interval	-17.41 to -8.377			95% confidence interval	-75.53 to -23.02
									R squared (eta squared)	0.8905			R squared (eta squared)	0.7785
									Data analyzed				Data analyzed
									Sample size, column A	5			Sample size, column A	5
									Sample size, column B	3			Sample size, column B	3

## Sheet: fR preBotC to 7n
Two Way Analysis of Variance SigmaPlot v11					Analysis Summary				Mann-Whitney Analysis										DATA preBotC to 7n									DATA control							fR preBotC--7n						fR preBotC--7n
										Below threshold?	P value	Mean rank of GtACR2	Mean rank of control	Mean rank diff.	Mann-Whitney U	Adjusted P Value			fR									fR
Two Way Analysis of Variance					Table Analyzed	fR			off	No	>0.999999	4.5	4.5	0	7.5	>0.999999			time	20210716A	20210716B	20210716C	20210714A	20210714B				time	20210917B	20210917C	20210917D				rats	basal	P1	P2	recovery		rats	basal	P1	P2	recovery
									P1	No	0.035714	3	7	-4	0	0.072143			0	227.832	363.188	304.776	221.357	336.679				0	283.347	166.129	349.65				20210716A	323.347	113.36	183.996	384.838		20210716A	100	35.0582	56.9036	119.017
Data source: Data 1 in fR - normality test					Column A	preBotC to 7n			P2	No	0.035714	3	7	-4	0	0.072143			1	113.487	327.816	215.917	167.949	228.441				1	262.439	165.283	404.887				20210716B	281.279	0	160.281	299.829		20210716B	100	0	56.983	106.595
					vs.	vs.			off2	No	0.142857	5.6	2.667	2.933	2	0.192381			2	275.634	308.423	335.389	196.094	176.198				2	329.575	204.704	339.992				20210716C	263.319	0	182.293	283.333		20210716C	100	0	69.2292	107.601
General Linear Model					Column B	control													3	422.533	320.174	335.914	201.025	249.619				3	282.588	180.637	298.501				20210914A	243.274	118.765	204.186	278.895		20210914A	100	48.8194	83.9327	114.642
																			4	294.258	296.609	355.644	183.618	207.584				4	275.784	178.358	216.185				20210914B	244.011	132.597	186.185	270.902		20210914B	100	54.3406	76.3018	111.02
Dependent Variable: data					Test details														5	295.945	342.912	377.386	145.119	201.159				5	279.968	157.465	307.832
					Test name	Mann-Whitney test													6	285.866	298.721	235.569	139.012	222.355				6	262.306	191.083	236.403
Normality Test:	Failed	(P < 0.050)			Comparison for each test	Compare ranks													7	284.983	328.825	293.728	147.639	299.527				7	256.43	159.687	301.235
					Multiple comparisons	Set P value threshold													8	275.96	361.609	276.818	142.061	224.765				8	234.995	187.692	263.042				fR control						fR control
Equal Variance Test:	Passed	(P = 0.180)			Method	Bonferroni-Dunn method													9	267.547	336.953	282.294	151.195	259.501				9	299.054	170.386	302.799
					Alpha	0.05													10	215.646	312.881	232.458	175.393	315.2				10	242.234	160.491	344.498				rats	basal	P1	P2	recovery		rats	basal	P1	P2	recovery
																			11	354.014	383.292	250.727	182.431	255.254				11	278.662	176.729	241.478				20210917B	274.953	255.357	274.971	243.429		20210917B	100	92.873	100.007	88.5348
					Number of tests performed	4													12	401.643	301.26	238.578	182.04	244.945				12	360.18	177.302	258.534				20210917C	175.926	138.78	147.691	193.189		20210917C	100	78.8852	83.9504	109.813
					Number of rows omitted	0													13	270.049	345.583	205.722	205.618	212.863				13	260.916	179.186	362.206				20210917D	341.887	316.427	335.534	311.503		20210917D	100	92.5531	98.1418	91.1131
																			14	329.229	342.154	235.236	289.872	210.734				14	310.94	185.334	392.741
																			15	295.099	323.396	248.399	280.237	185.999				15	277.707	163.712	332.203
																			16	118.126	0	111.382	202.223	230.488				16	329.471	139.858	292.099
																			17	156.211	141.624	42.833	163.407	188.171				17	330.239	134.432	305.007
					Statistics - only P1 period														18	103.354	173.758	0	82.1515	137.934				18	317.083	147.73	291.818
																			19	118.47	158.535	0	89.0251	126.724				19	296.964	142.646	363.008
					ormality Test:	Passed	(P = 0.388)												20	130.464	190.447	93.6459	185.792	162.786				20	264	180.451	358.072
																			21	143.444	156.298	58.7141	154.975	148.112				21	322.748	175.728	263.572
					Equal Variance Test:	Passed	(P = 0.110)												22	166.759	270.995	0	171.285	206.996				22	278.83	181.285	354.485
																			23	213.986	305.877	192.62	200.277	166.847				23	274.084	171.999	324.766
					Group Name	N	Missing	Mean	Std Dev	SEM									24	181.614	277.062	170.91	224.243	166.735				24	267.468	221.28	403.66
					preBotC to 7n	5	0	27.644	26.194	11.714									25	170.843	291.983	220.366	193.207	205.467				25	261.102	151.375	279.663
					control	3	0	88.104	7.985	4.61									26	152.123	238.916	198.618	255.873	254.532				26	210.084	177.456	305.948
																			27	168.092	273.544	234.365	317.013	281.806				27	269.652	167.427	385.074
					Difference	-60.46													28	180.862	245.482	248.933	258.58	216.389				28	254.83	146.415	340.348
																			29	233.057	278.279	217.694	245.358	263.196				29	214.598	127.567	318.583
					t = -3.784 with 6 degrees of freedom. (P = 0.009)														30	147.181	282.378	312.846	174.19	219.842				30	258.458	119.401	315.508
																			31	239.711	290.435	266.464	220.955	287.414				31	294.42	116.502	369.823
					95 percent confidence interval for difference of means: -99.556 to -21.364														32	225.089	345.749	223.202	222.021	304.936				32	297.429	129.394	328.656
																			33	233.604	361.176	262.104	228.536	219.5				33	219.507	121.711	294.672
																			34	292.279	332.344	154.846	236.771	276.87				34	283.396	261.892	381.841
																			35	258.219	341.128	298.419	230.426	273.34				35	339.299	218.659	325.226
																			36	266.515	285.385	280.221	303.98	290.968				36	344.624	211.473	326.788
																			37	282.965	301.48	364.75	265.023	238.675				37	300.974	234	319.827
																			38	271.843	332.326	343.611	216.824	340.522				38	321.638	187.426	323.987
																			39	334.19	319.899	282.989	254.794	212.261				39	287.613	176.116	323.378
																			40	309.618	359.435	266.16	332.767	232.977				40	325.391	194.274	425.555
																			41	284.304	389.887	312.684	287.043	322.896				41	322.272	183.224	446.601
																			42	291.507	338.029	317.118	339.128	225.219				42	301.762	153.964	335.911
																			43	270.119	284.369	282.919	270.065	240.599				43	230.517	193.418	495.209
																			44	369.712	313.147	302.639	268.852	224.703				44	324.688	155.455	348.896
																			45	258.26	322.656	250.41	238.064	222.956				45	299.877	253.086	319.222
																			46	264.653	340.049	256.23	261.611	299.102				46	351.637	219.655	394.052
																			47	184.049	336.433	259.216	249.639	147.334				47	305.15	218.397	278.944
																			48	293.642		262.295	170.959	217.57				48	241.337	192.889	335.185
																			49	371.058		288.496	317.603	228.976				49	239.613	170.389	407.575
																			50	388.708		314.294	263.437	258.22				50	256.829	128.024	320.936
																			51	334.758		396.398	382.847	292.648				51	221.722	181.301	319.542
																			52	425.401		206.784	289.174	201.577				52	313.76	140.956	217.301
																			53	279.721		171.671	260.322	240.255				53	315.745	175.11	340.696
																			54	390.381		307.781	271.676	256.479				54	309.493	208.304	249.592
																			55	317.007		216.737		208.105				55	374.937	244.233	282.24
																			56	273.63		278.155						56	358.729	232.981	266.044
																			57	357.486		147.53						57	322.669	199.317	295.915
																			58	285.656		187.837						58	342.173	199.657	274.17
																			59	340.27		303.765						59	316.967	174.838	249.932
																			60	283.544		267.496						60	321.22	205.226	220.469
																			61	332.682		185.879						61	282.538	187.992	293.058
																			62	254.366		241.777						62	238.032	191.57	231.197
																			63	262.907								63	351.538	152.297	256.099
																												64	250.558	194.223
																												65		206.485
																												66		128.612
																												67		185.994
																												68		241.593
																												69		200.564
																												70		134.338
																												71
																												72
																												73
																												74
																												75

## Sheet: DIA activity- preBotC to 7n
Two Way Analysis of Variance SigmaPlot v11					Analysis Summary				Mann-Whitney Analysis											DATA preBotC to 7n									DATA control								DATA preBotC to 7n									DATA control
										Below threshold?	P value	Mean rank of GtACR2	Mean rank of control	Mean rank diff.	Mann-Whitney U	Adjusted P Value				AUC DIA									AUC DIA								DIA amplitude									DIA amplitude
wo Way Analysis of Variance					Table Analyzed	DIA amplitude			off	No	>0.999999	4.5	4.5	0	7.5	>0.999999				rats	off	P1	P2	off					rats	off	P1	P2	off				time	20210716A	20210716B	20210716C	20210714A	20210714B				time	20210917B	20210917C	20210917D
									P1	No	0.035714	3	7	-4	0	0.142857				20210716A	0.0203076	0.0136039	0.035498	0.017178					20210917B	0.0448498	0.0405181	0.0427058	0.0477443				0	0.41162	0.57822	0.83656	0.97519	0.64423				0	0.5892	0.69218	0.2652
Data source: Data 1 in DIA activity sigma					Column A	preBotC to 7n			P2	No	0.785714	4.8	4	0.8	6	>0.999999				20210716B	0.029184	0.0257874	0.0390372	0.0366498					20210917C	0.104258	0.113671	0.145202	0.113932				1	0.38162	0.67557	0.7654	0.88093	0.69124				1	0.61894	0.51891	0.32058
					vs.	vs.			off2	No	0.142857	3.4	6.333	-2.933	2	0.571429				20210716C	0.0577785	0.0181567	0.0749003	0.0438473					20210917D	0.0308998	0.0321473	0.0301288	0.0464535				2	0.35084	0.80086	0.81577	2.55425	0.72977				2	0.47166	0.62197	0.34281
General Linear Model					Column B	control														20210714A	0.0671473	0.0584186	0.0691787	0.0695798													3	0.27178	0.72419	0.67957	1.08591	0.75241				3	0.56187	0.55489	0.24543
																				20210714B	0.0846995	0.0735691	0.0553271	0.0637871													4	0.45816	0.64328	0.73542	1.21908	0.83816				4	0.5897	0.53359	0.25496
Dependent Variable: data					Test details																																5	0.43195	0.56339	0.64626	1.34302	0.80516				5	0.61222	0.66885	0.2583
					Test name	Mann-Whitney test																															6	0.4532	0.73888	0.75566	1.33853	0.65283				6	0.55845	0.63536	0.38811
Normality Test:	Failed	(P < 0.050)			Comparison for each test	Compare ranks																															7	0.47984	0.68035	0.87279	1.11063	0.77536				7	0.58893	0.58901	0.4088
					Multiple comparisons	Set P value threshold																															8	0.37993	0.55696	0.8423	1.09725	0.94932				8	0.48696	0.59567	0.46918
Equal Variance Test:	Passed	(P = 0.834)			Method	Bonferroni-Dunn method																															9	0.45486	0.61676	0.78018	1.21519	0.68964				9	0.54274	0.6106	0.4926
					Alpha	0.05														DATA preBotC to 7n									DATA control								10	0.32342	0.69056	0.88683	1.32601	0.71279				10	0.42121	0.41596	0.36443
																				AUC DIA									AUC DIA								11	0.35847	0.55574	1.00676	1.06847	1.11732				11	0.59349	0.68037	0.40391
					Number of tests performed	4														rats	off	P1	P2	off					rats	off	P1	P2	off				12	0.37854	0.51675	1.15934	1.02301	0.95119				12	0.5036	0.72052	0.36587
					Number of rows omitted	1														20210716A	100	66.989	174.801	84.589					20210917B	100	90.3418	95.2195	106.454				13	0.40671	0.64054	0.66844	0.50482	0.93459				13	0.43864	0.69384	0.26049
																				20210716B	100	88.3615	133.762	125.582					20210917C	100	109.028	139.271	109.278				14	0.34045	0.58506	0.72848	0.63443	1.0389				14	0.53616	0.58284	0.45946
																				20210716C	100	31.4247	129.633	75.8885					20210917D	100	104.037	97.5049	150.336				15	0.35286	0.5693	0.84367	0.628	0.85243				15	0.50301	0.61148	0.42795
																				20210714A	100	87.0006	103.025	103.623													16	0.30264	0.49302	0.333571	0.54095	0.62886				16	0.44409	0.50542	0.40968
																				20210714B	100	86.859	65.3217	75.3099													17	0.33066	0.4488	0.887273	0.91742	0.89032				17	0.49627	0.46331	0.33508
																																					18	0.34401	0.51181	0.0418345	1.3054	0.98096				18	0.39353	0.59944	0.28118
					Statistics - only P1 period																																19	0.36878	0.56585	0.0418345	0.87079	0.80821				19	0.40004	0.57329	0.3417
																																					20	0.39904	0.52262	0.95281	0.76253	0.70448				20	0.3728	0.52919	0.38609
					Normality Test:	Passed	(P = 0.066)																														21	0.42068	0.72834	0.480183	0.85087	0.70618				21	0.42337	0.61687	0.38063
																																					22	0.54821	0.55179	0.0418345	0.82127	0.73586				22	0.52785	0.68435	0.35976
					Equal Variance Test:	Passed	(P = 0.639)																														23	0.49027	0.68577	1.22924	0.81908	0.68756				23	0.39283	0.64583	0.2728
																																					24	0.50342	0.63625	1.04677	0.76746	0.73655				24	0.50224	0.65637	0.23608
					Group Name	N	Missing	Mean	Std Dev	SEM																											25	0.45616	0.64273	1.01454	0.84858	0.63087				25	0.44195	0.62285	0.28672
					preBotC to 7n	5	0	72.127	24.418	10.92																											26	0.46724	0.64493	1.44079	1.15113	0.68417				26	0.47847	0.6626	0.25074
					control	3	0	101.136	9.675	5.586																											27	0.44603	0.63955	1.0849	1.02946	0.6529				27	0.413	0.67358	0.37178
																																					28	0.47436	0.67536	1.04823	1.17132	0.58084				28	0.41342	0.56035	0.31286
					Difference	-29.009																															29	0.40078	0.54923	0.81356	0.87466	0.57417				29	0.40835	0.58842	0.27502
																																					30	0.71225	0.55757	0.81554	0.95866	0.66485				30	0.48367	0.6522	0.26701
					t = -1.919 with 6 degrees of freedom. (P = 0.103)																																31	0.38538	0.70899	0.68295	1.12563	0.65426				31	0.44126	0.75149	0.26905
																																					32	0.34007	0.6353	0.69439	0.85613	0.73798				32	0.5118	0.70034	0.27788
					95 percent confidence interval for difference of means: -66.008 to 7.990																																33	0.28797	0.60983	0.7608	0.8643	0.60885				33	0.37166	0.79306	0.26847
																																					34	0.28889	0.46657	0.88428	0.81371	0.63871				34	0.49958	0.6788	0.26178
																																					35	0.3217	0.54973	0.99214	0.88463	0.53975				35	0.45992	0.78845	0.28021
																																					36	0.31483	0.53827	1.00364	0.91999	0.72956				36	0.51948	0.7733	0.27676
																																					37	0.29486	0.58405	0.6797	0.8834	0.78632				37	0.45965	0.7991	0.27354
																																					38	0.32592	0.46371	0.66418	0.59318	0.71011				38	0.40791	0.68485	0.33196
																																					39	0.31631	0.68013	0.59524	0.71712	0.70098				39	0.5672	0.58062	0.33155
																																					40	0.3254	0.65094	0.64066	0.74587	0.91557				40	0.47167	0.58197	0.2999
																																					41	0.34863	0.56685	0.80491	0.91519	0.66476				41	0.4455	0.55357	0.35209
																																					42	0.37672	0.53255	0.88604	0.84551	0.7494				42	0.4248	0.53241	0.36095
																																					43	0.29692	0.50066	0.99019	0.82338	0.67818				43	0.40755	0.44374	0.44006
																																					44	0.28026	0.57286	0.99371	0.71829	0.80637				44	0.43623	0.39568	0.40644
																																					45	0.31976	0.53418	0.90006	0.93054	0.88127				45	0.46605	0.40201	0.43982
																																					46	0.29414	0.54475	0.92849	0.73221	0.7502				46	0.38965	0.56404	0.39281
																																					47	0.27011	0.59208	0.9269	0.98119	0.62928				47	0.33364	0.46431	0.30865
																																					48	0.25353		1.02298	0.8153	0.69728				48	0.39561	0.55434	0.31527
																																					49	0.29687		0.94825	0.81957	0.79032				49	0.44357	0.59394	0.32252
																																					50	0.26982		0.90893	0.77304	0.74443				50	0.42574	0.6286	0.32227
																																					51	0.31021		0.88892	0.85073	0.60678				51	0.47667	0.61559	0.54068
																																					52	0.32257		0.57928	0.81092	0.65452				52	0.49445	0.70644	0.50168
																																					53	0.34142		0.74276	0.93309	0.74852				53	0.32238	0.74686	0.43784
																																					54	0.32992		0.82964	1.14333	0.88629				54	0.4856	0.76466	0.30146
																																					55	0.36172		0.90973		0.76765				55	0.53991	0.6249	0.43419
																																					56	0.26731		0.81987						56	0.44503	0.51927	0.40479
																																					57	0.33321		0.47167						57	0.46935	0.6995	0.54948
																																					58	0.33332		0.82354						58	0.49468	0.65302	0.377
																																					59	0.33348		0.80974						59	0.47931	0.89287	0.4939
																																					60	0.25414		0.87631						60	0.43929	0.77486	0.52871
																																					61	0.3541		0.80231						61	0.40119	0.71505	0.40113
																																					62	0.27104		0.96343						62	0.36769	0.72847	0.48519
																																					63	0.32054								63	0.33458	0.75814	0.46088
																																														64	0.49117	0.64152
																																														65		0.57757
																																														66		0.67572
																																														67		0.68927
																																														68		0.67103
																																														69		0.7077
																																														70		0.64335
																																														71
																																														72
																																														73
																																														74
																																														75

## Sheet: HR preBotC to 7n
Two Way Analysis of Variance SigmaPlot v11					Analysis Summary				Mann-Whitney Analysis										DATA preBotC to 7n								DATA control							HR preBotC--7n						HR preBotC--7n
										Below threshold?	P value	Mean rank of GtACR2	Mean rank of control	Mean rank diff.	Mann-Whitney U	Adjusted P Value												HR
Two Way Analysis of Variance					Table Analyzed	HR			off	No	>0.999999	4.5	4.5	0	7.5	>0.999999			time	20210716A	20210716B	20210716C	20210714A	20210714B			time	20210917B	20210917C	20210917D				rats	off	P1	P2	off		rats	off	P1	P2	off
									P1	No	0.25	5.4	3	2.4	3	>0.999999			0	268.189	273.202	244.656	214.509	338.722			0	194.439	349.876	380.221				20210716A	264.552	277.501	278.984	246.322		20210716A	100	104.895	105.455	93.1089
Data source: Data 1 in HR - normality test					Column A	preBotC to 7n			P2	No	0.571429	5	3.667	1.333	5	>0.999999			1	384.447	279.173	243.934	182.31	338.144			1	243.788	347.332	387.77				20210716B	296.701	346.249	351.996	306.283		20210716B	100	116.699	118.636	103.229
					vs.	vs.			off2	No	>0.999999	4.4	4.667	-0.2667	7	>0.999999			2	269.182	264.31	243.532	226.552	341.693			2	242.684	362.085	380.472				20210716C	261.485	271.37	259.733	268.113		20210716C	100	103.78	99.3299	102.535
General Linear Model					Column B	control													3	279.055	273.61	240.855	203.88	330.264			3	270.272	352.134	385.906				20210914A	207.746	222.957	245.026	221.136		20210914A	100	107.322	117.945	106.445
																			4	272.472	271.793	243.12	174.939	306.112			4	264.498	355.947	386.788				20210914B	258.104	227.093	173.619	241.152		20210914B	100	87.9851	67.2668	93.432
Dependent Variable: data					Test details														5	275.028	276.831	242.514	203.868	306.277			5	258.399	325.688	388.619
					Test name	Mann-Whitney test													6	267.054	279.117	242.807	201.766	306.415			6	270.01	342.576	392.842
Normality Test:	Failed	(P < 0.050)			Comparison for each test	Compare ranks													7	285.803	279.126	242.15	171.845	267.67			7	270.445	329.941	385.881
					Multiple comparisons	Set P value threshold													8	287.893	273.818	241.156	193.485	250.384			8	261.706	347.035	388.122				HR control						HR control
Equal Variance Test:	Passed	(P = 0.206)			Method	Bonferroni-Dunn method													9	272.085	287.294	240.387	176.001	343.972			9	269.011	338.5	390.39
					Alpha	0.05													10	264.274	280.763	235.642	207.623	324.247			10	255.927	352.581	380.631				rats	off	P1	P2	off		rats	off	P1	P2	off
																			11	259.479	263.749	239.166	188.619	281.283			11	260.463	323.835	389.591				20210917B	252.642	247.592	262.879	257.273		20210917B	100	98.001	104.052	101.833
					Number of tests performed	4													12	263.072	277.265	235.709	220.539	237.375			12	267.842	333.993	388.677				20210917C	340.66	342.088	352.507	355.403		20210917C	100	100.419	103.478	104.328
					Number of rows omitted	0													13	250.144	255.515	238.256	205.036	217.3			13	259.492	335.06	385.008				20210917D	388.099	391.881	380.941	394.592		20210917D	100	100.974	98.1557	101.673
																			14	247.438	276.302	240.231	280.498	266.809			14	261.49	351.856	390.181
																			15	257.634	277.998	245.123	339.34	289.829			15	253.817	339.555	393.949
																			16	293.854	275.892	262.473	198.251	297.922			16	243.959	338.242	392.881
																			17	260.981	276.606	271.991	227.042	310.739			17	257.018	354.306	391.192
					Statistics - only P1 period														18	267.122	275.614	265.68	214.449	235.207			18	252.149	358.483	391.625
																			19	256.768	274.913	279.906	227.247	254.129			19	248.944	347.789	374.968
																			20	265.072	279.347	277.178	216.072	208.193			20	265.659	355.742	392.908
					Normality Test:	Passed	(P = 0.097)												21	318.27	275.327	270.074	309.568	201.179			21	259.588	348.759	392.659
																			22	281.343	274.866	270.239	237.88	191.743			22	272.063	338.86	398.785
					Equal Variance Test:	Passed	(P = 0.314)												23	276.756	276.8	280.72	332.562	176.953			23	263.618	325.792	388.229
																			24	273.513	278.984	249.744	333.065	184.134			24	269.837	342.773	366.38
					Group Name	N	Missing	Mean	Std Dev	SEM									25	300.436	273.313	247.179	329.362	189.27			25	241.346	343.648	380.231
					preBotC to 7n	5	0	104.136	10.363	4.634									26	280.4	282.631	257.979	345.377	190.379			26	254.068	343.093	366.166
					control	3	0	99.798	1.581	0.913									27	296.076	275.291	251.811	349.679	191.382			27	257.445	338.802	389.198
																			28	296.513	279.171	240.8	254.067	189.323			28	250.824	348.683	376.733
					Difference	4.338													29	279.113	280.23	239.737	340.555	185.845			29	258.441	357.846	387.127
																			30	279.238	272.584	245.173	340.207	189.022			30	261.931	358.083	391.866
					t = 0.698 with 6 degrees of freedom. (P = 0.511)														31	248.838	280.171	245.924	292.152	256.598			31	258.236	359.799	392.112
																			32	274.978	264.107	246.054	234.587	302.902			32	258.421	360.675	386.717
					95 percent confidence interval for difference of means: -10.869 to 19.545														33	272.426	273.168	267.378	212.075	198.179			33	255.512	353.512	385.764
																			34	264.998	273.234	271.799	208.394	310.657			34	257.779	349.448	379.291
																			35	261.874	276.057	265.139	179.057	186.613			35	255.874	349.639	381.1
																			36	261.082	276.122	260.167	201.142	283.094			36	253.405	353.175	390.57
																			37	257.558	276.575	239.018	255.096	185.686			37	245.528	352.38	391.831
																			38	253.38	280.308	245.26	208.538	259.328			38	250.774	332.383	382.665
																			39	261.275	281.967	246.687	196.992	324.985			39	257.363	349.025	384.151
																			40	261.445	294.671	248.227	201.644	325.831			40	253.165	342.841	388.332
																			41	259.362	282.82	248.918	326.45	342.937			41	238.227	334.997	380.58
																			42	253.827	271.35	231.517	219.404	329.462			42	245.064	327.348	381.067
																			43	254.959	270.076	239.324	219.629	322.041			43	250.596	344.585	387.703
																			44	266.791	281.774	238.265	190.484	336.292			44	250.313	347.464	389
																			45	257.152	272.828	263.779	250.345	327.514			45	258.916	352.886	383.604
																			46	250.563	275.503	265.918	219.998	333.816			46	251.771	345.491	385.106
																			47	249.147	285.206	273.116	226.952	271.484			47	257.24	323.883	392.018
																			48	254.703		265.09	207.893	248.383			48	251.525	337.127	385.803
																			49	251.35		262.121	292.516	260.225			49	257.224	350.313	375.24
																			50	256.176		267.283	263.404	232.909			50	258.73	340.095	392.026
																			51	241.23		259.097	304.207	256.29			51	257.583	368.122	395.681
																			52	247.419		236.648	232.364	222.89			52	251.366	347.413	391.229
																			53	251.897		243.091	244.395	286.004			53	249.327	354.08	397.638
																			54	241.843		279.022	227.248	253.8			54	249.975	361.35	376.852
																			55	241.587		254.242		260.785			55	255.411	347.738	398.916
																			56	246.363		251.336					56	253	343.245	359.772
																			57	256.806		250.03					57	253.218	357.122	353.811
																			58	243.662		245.354					58	246.536	353.762	395.973
																			59	232.412		238.31					59	247.851	353.04	383.674
																			60	250.156		244.817					60	243.415	354.672	369.894
																			61	244.962		273.876					61	232.88	358.455	365.368
																			62	338.418		280.245					62	246.888	355.375	391.537
																			63	256.265							63	252.945	361.709	380.518
																											64	246.801	363.659
																											65		363.396
																											66		347.456
																											67		362.171
																											68		363.513
																											69		363.922
																											70		359.355
																											71

## Sheet: MP activity- preBotC to 7n
Two Way Analysis of Variance SigmaPlot v11					Analysis Summary				Mann-Whitney Analysis											DATA preBotC to 7n								DATA control
										Below threshold?	P value	Mean rank of preotC to 7n	Mean rank of control	Mean rank diff.	Mann-Whitney U	Adjusted P Value				AUC MP								AUC MP
wo Way Analysis of Variance					Table Analyzed	MP activity			off	No	>0.999999	4.5	4.5	0	7.5	>0.999999				rats	off	P1	P2	off				rats	off	P1	P2	off
									P1	No	0.071429	5.8	2.333	3.467	1	0.285714				20210716A	0.0336647	0.0454174	0.0740018	0.0427235				20210917B	0.108214	0.108165	0.102093	0.111537
Data source: Data 1 in MP aactivity sigma					Column A	preBotC to 7n			p2	No	0.25	5.4	3	2.4	3	>0.999999				20210716B	0.0299871	0.0422469	0.0614047	0.0257727				20210917C	0.055989	0.0625385	0.0782709	0.0965591
					vs.	vs.			off2	No	0.25	3.6	6	-2.4	3	>0.999999				20210716C	0.0335923	0.0683367	0.0812641	0.0461514				20210917D	0.0241261	0.0314471	0.0262279	0.0326624
General Linear Model					Column B	control														20210714A	0.0885568	0.183022	0.155189	0.089923
																				20210714B	0.128166	0.201602	0.105411	0.0976417
Dependent Variable: data					Test details
					Test name	Mann-Whitney test
Normality Test:	Failed	(P < 0.050)			Comparison for each test	Compare ranks
					Multiple comparisons	Set P value threshold
Equal Variance Test:	Passed	(P = 0.134)			Method	Bonferroni-Dunn method														noise								noise
					Alpha	0.05														20210716A	0.00995469							20210917B	0.01106
																				20210716B	0.0169205							20210917C	0.019701
					Number of tests performed	4														20210716C	0.0125213							20210917D	0.00957337
					Number of rows omitted	0														20210714A	0.0146269
																				20210714B	0.0193322
					Statistics - only P1 period
																				DATA preBotC to 7n								DATA control
					Normality Test:	Passed	(P = 0.859)													AUC MP								AUC MP
																				rats	off	P1	P2	off				rats	off	P1	P2	off
					Equal Variance Test:	Passed	(P = 0.288)													20210716A	0.02371	0.0354627	0.0640471	0.0327688				20210917B	0.0971544	0.0971052	0.091033	0.100477
																				20210716B	0.0130666	0.0253264	0.0444842	0.00885224				20210917C	0.036288	0.0428375	0.0585699	0.0768581
					Group Name	N	Missing	Mean	Std Dev	SEM										20210716C	0.021071	0.0558154	0.0687428	0.0336301				20210917D	0.0145527	0.0218737	0.0166545	0.0230891
					preBotC to 7n	5	0	200.708	46.42	20.76										20210714A	0.0739299	0.168395	0.140562	0.075296
					control	3	0	122.768	25.508	14.727										20210714B	0.108834	0.18227	0.0860784	0.0783095
					Difference	77.939
					t = 2.625 with 6 degrees of freedom. (P = 0.039)
					95 percent confidence interval for difference of means: 5.276 to 150.602
																				DATA preBotC to 7n								DATA control
																				AUC MP								AUC MP
																				rats	off	P1	P2	off				rats	off	P1	P2	off
																				20210716A	100	149.568	270.127	138.207				20210917B	100	99.9493	93.6992	103.42
																				20210716B	100	193.825	340.441	67.7469				20210917C	100	118.049	161.403	211.8
																				20210716C	100	264.892	326.243	159.603				20210917D	100	150.307	114.443	158.658
																				20210714A	100	227.777	190.129	101.848
																				20210714B	100	167.476	79.0918	71.9534

## Sheet: apnea
DATA preBotC to 7n					DATA control				apnea duration				missed resp cycles
	apnea duration	1 resp cycle	missed res cycles		rats	apnea duration	missed res cycles		Column B	control			Column B	control
20210716A	0		0		20210917B	0	0		vs.	vs.			vs.	vs.
20210716B	0.835369	0.22052	3.78818		20210917C	0	0		Column A	preBotC to 7n			Column A	preBotC to 7n
20210716C	1.14773	0.2571	4.46412		20210917D	0	0
20210714A	0		0						Unpaired t test with Welch's correction				Unpaired t test with Welch's correction
20210714B	0		0						P value	0.1848			P value	0.1797
									P value summary	ns			P value summary	ns
									Significantly different (P < 0.05)?	No			Significantly different (P < 0.05)?	No
average	0.396619		1.65046						One- or two-tailed P value?	Two-tailed			One- or two-tailed P value?	Two-tailed
SD	0.554207		2.27259						Welch-corrected t, df	t=1.600, df=4.000			Welch-corrected t, df	t=1.624, df=4.000
confidence 95%	0.6838		2.8214
bottom limit	-0.2915		-1.171						How big is the difference?				How big is the difference?
upper limit	1.085		4.472						Mean of column A	0.3966			Mean of column A	1.65
n	5		5						Mean of column B	0			Mean of column B	0
									Difference between means (B - A) ± SEM	-0.3966 ± 0.2478			Difference between means (B - A) ± SEM	-1.650 ± 1.016
									95% confidence interval	-1.085 to 0.2915			95% confidence interval	-4.472 to 1.171
									R squared (eta squared)	0.3903			R squared (eta squared)	0.3973
									Data analyzed				Data analyzed
									Sample size, column A	5			Sample size, column A	5
									Sample size, column B	3			Sample size, column B	3
